# Supplementary material for: Identifying Potential Mitochondrial Proteome Signatures Associated with the Pathogenesis of Pulmonary Arterial Hypertension in the Rat Model
Source: Oxid Med Cell Longev. 2022 Feb 21;2022:8401924. doi: 10.1155/2022/8401924 (PMC8885180; doi:10.1155/2022/8401924)
Supplement: Supplementary Materials — Supplementary Table S1: the label-free quantitative analysis of the mitochondrial proteome in the rat model. Supplementary Table S2: the significant mitochondrial DEPs in the PAH rat model when compared with control. Supplementary Table S3: identification of upregulated mitochondrial genes based on functional enrichment of the PPI network. Supplementary Table S4: identification of downregulated mitochondrial genes based on functional enrichment of the PPI network. Supplementary Figure S1: the visualization of the PPI network with upregulated mitochondrial DEPs. Supplementary Figure S2: the visualization of the PPI network with downregulated mitochondrial DEPs. [file 8401924.f1.zip › Supplementary Table S1.txt]

Supplementary Table S1. The result of label-free quantitative analysis of the mitochondrial proteome in rat model.
Accession	Symbol	Description	Coverage [%]	# Peptides	# PSMs	# Unique Peptides	# Protein Groups	# AAs	MW [kDa]	calc. pI	Score Sequest HT: Sequest HT	# Peptides (by Search Engine): Sequest HT	# Razor Peptides	97	101	112	114	99	102	46	35	19	32	57	45
A0A023IKI3	Psmb8	Proteasome subunit beta OS=Rattus norvegicus OX=10116 GN=Psmb8 PE=2 SV=1	13	3	14	1	1	276	30.6	7.78	39.73	3	0	671454.3191	NA	NA	NA	1349253.344	299760.2938	NA	981107.0635	1246391.743	288305.0362	NA	605502.8611
A0A023IKJ0	Tap2	Transporter 1 ATP-binding cassette sub-family B OS=Rattus norvegicus OX=10116 GN=Tap2 PE=2 SV=1	26	16	133	1	1	725	79	8.62	326.16	16	0	769543.396	605211.5625	770930.0214	NA	NA	458664.1921	381255.4576	NA	673116.7414	NA	423060.6211	563142.2924
A0A023ILN9	Psmb9	Proteasome subunit beta OS=Rattus norvegicus OX=10116 GN=Psmb9 PE=2 SV=1	26	4	26	4	1	219	23.3	5.12	60.98	4	0	7880948.585	8664999.906	9910425.132	7622010.718	11969328.52	10460877.39	10287662.07	8419895.805	7640963.413	5171509.466	6968650.195	4649463.018
A0A023IM45	Psmb8	Proteasome subunit beta OS=Rattus norvegicus OX=10116 GN=Psmb8 PE=2 SV=1	18	4	16	2	1	276	30.6	7.08	44.35	4	2	1919778.728	3910878.469	2726551.835	1745524.565	3560958.702	3546893.878	3150589.217	5011082.772	2661150.736	678807.6832	2296921.798	4362792.735
A0A023IM52	#N/A	RT1-DOb OS=Rattus norvegicus OX=10116 GN=DOb PE=2 SV=1	5	1	4	1	1	272	30.6	5.06	9.36	1	0	596422.2278	657367.6875	1431469.653	756433.4349	814757.1264	626877.1084	510439.7495	NA	678877.8015	861243.7004	744754.7533	903613.9471
A0A023IM54	Tapbp	TAP binding protein OS=Rattus norvegicus OX=10116 GN=Tapbp PE=2 SV=1	25	10	139	10	1	464	50	7.65	331.59	10	0	23478150.34	28230632.37	29030812.33	20846940.92	49023936.48	27964527.63	18040403.1	14330126.21	24553046.33	36578411.55	41223850.85	43444072.64
A0A023IM59	#N/A	RT1-Da OS=Rattus norvegicus OX=10116 GN=DA1 PE=2 SV=1	23	4	89	4	1	255	29.2	5.19	205.52	4	0	19029251.8	21049587.16	28341438.01	25984419.77	30828927.51	16078823.15	19825409.34	1442787.584	26498358.17	38219021.39	63025398.54	46372809.55
A0A023IMI9	Tap2	Transporter 2 ATP-binding cassette sub-family B OS=Rattus norvegicus OX=10116 GN=Tap2 PE=2 SV=1	19	11	70	2	1	703	77.7	6.73	152.48	11	9	29775932.97	29833089.19	31825535.32	25521723.88	36554314.33	32106775.91	15851337.34	5130143.794	21106222.75	16586091.39	32491093.23	31761333.27
A0A059NZR0	Hn1	HN1 OS=Rattus norvegicus OX=10116 GN=Jpt1 PE=1 SV=1	10	1	1	1	1	149	15.6	5.12	2.29	1	0	NA	NA	NA	NA	NA	NA	NA	NA	NA	NA	NA	NA
A0A068F1Y2	Actb	Beta-actin (Fragment) OS=Rattus norvegicus OX=10116 GN=Actb PE=2 SV=1	59	10	557	1	1	186	20.4	5.91	1432.41	10	0	NA	NA	4775406.332	NA	NA	NA	NA	NA	1411235.035	34118558.14	543887.1783	NA
A0A096MIS5	Tmem168	Transmembrane protein 168 OS=Rattus norvegicus OX=10116 GN=Tmem168 PE=1 SV=1	7	5	19	5	1	697	79.7	8.03	40.32	5	0	1246324.02	1485895.813	1540945.879	1459143.758	2000497.571	1416325.102	1045532.269	520382.3337	1334289.856	1468040.089	2152720.684	1685406.007
A0A096MIU6	LOC103694908	Low affinity immunoglobulin gamma Fc region receptor III-like OS=Rattus norvegicus OX=10116 GN=LOC103694908 PE=4 SV=1	4	1	1	1	1	267	30.3	8.68	2.13	1	0	817525.2154	1055212.25	1843977.367	639168.7846	1098113.764	1323300.489	631140.3251	267412.0185	1561259.745	2043088.633	2147302.429	1911622.872
A0A096MIV5	Abcf2	ATP-binding cassette subfamily F member 2 OS=Rattus norvegicus OX=10116 GN=Abcf2 PE=1 SV=1	12	6	34	6	1	627	71.6	7.14	86.11	6	0	3788675.523	990104.2188	2146990.523	67700.67207	2406433.161	1897288.119	4593341.431	3448457.114	3544909.381	1922645.335	6076959.579	5760235.782
A0A096MIX2	Ddx17	DEAD (Asp-Glu-Ala-Asp) box polypeptide 17, isoform CRA_a OS=Rattus norvegicus OX=10116 GN=Ddx17 PE=1 SV=1	31	18	148	12	1	652	72.6	8.68	319.23	18	5	44078256.15	20386931.75	24306183.16	24425171.51	20240750.28	18934175.5	36196963.98	27244223.55	44300284.63	40190218.63	48497833.25	28022912.96
A0A096MJ11	Gsdmd	Gasdermin D OS=Rattus norvegicus OX=10116 GN=Gsdmd PE=1 SV=1	8	3	11	3	1	488	53.2	4.93	24.91	3	0	728149.8352	955018.0625	1012705.44	669931.0534	976918.4743	829122.1956	1041023.379	401047.1796	997889.5072	1176254.507	355093.6608	643045.3854
A0A096MJ37	Urgcp	RCG35712, isoform CRA_e OS=Rattus norvegicus OX=10116 GN=Urgcp PE=4 SV=1	1	1	1	1	1	928	104.5	6.52	2.09	1	0	23616.00961	34457.94922	NA	NA	65121.53473	NA	102251.5405	98683.33824	124886.8952	39858.60193	101443.0886	72125.09586
A0A096MJ98	Parp4	Uncharacterized protein (Fragment) OS=Rattus norvegicus OX=10116 PE=1 SV=1	20	5	11	1	1	407	45.9	6.65	22.24	5	0	NA	NA	NA	NA	NA	NA	NA	NA	323813.1401	NA	NA	NA
A0A096MJ99	Vamp4	Vesicle-associated membrane protein 4 OS=Rattus norvegicus OX=10116 GN=Vamp4 PE=1 SV=1	18	2	8	2	1	141	16.4	7.34	23.72	2	0	2024919.106	1902113.5	1109939.843	1245041.723	2905135.008	1381734.074	969126.1842	466411.7465	499110.657	NA	1542199.501	2554711.868
A0A096MJI4	Gigyf2	Uncharacterized protein (Fragment) OS=Rattus norvegicus OX=10116 GN=Gigyf2 PE=1 SV=1	5	2	6	2	1	538	64.1	8.7	14.2	2	0	816253.6352	684807.2427	1234759.297	NA	609937.8132	1414481.306	1565056.318	2133825.092	820360.5792	488489.8751	1711402.768	1550658.297
A0A096MJR6	Parp4	Poly [ADP-ribose] polymerase (Fragment) OS=Rattus norvegicus OX=10116 PE=1 SV=1	14	9	53	9	1	804	89.8	5.57	124.56	9	0	5412546.064	6886979.5	8403199.148	6072253.533	7398312.611	5904945.059	7305541.537	1162677.846	6076450.654	9501899.292	13888907.37	13070366.86
A0A096MJT3	4-Sep	Septin 4 OS=Rattus norvegicus OX=10116 GN=Sept4 PE=1 SV=1	41	12	105	11	1	360	41.8	6.9	257.29	12	1	23950645.4	25071589.69	18910234.9	16523074.72	22057517.36	20428329.42	29962574.96	4083496.606	23343371.83	10201182.31	17681904.83	31809853.68
A0A096MJW8	Plch1	Phosphoinositide phospholipase C OS=Rattus norvegicus OX=10116 GN=Plch1 PE=4 SV=1	0	1	26	1	1	1648	183.6	7.46	33.06	1	0	4842094.078	5499500.125	6054132.255	5024386.474	5016886.815	4723328.975	3756160.876	7417332.879	2700239.668	3766707.723	6828385.44	4566966.687
A0A096MJY6	Gbe1	Glucan (1,4-alpha-), branching enzyme 1 (Fragment) OS=Rattus norvegicus OX=10116 GN=Gbe1 PE=1 SV=1	30	10	44	5	1	412	47.1	6.61	114.26	10	0	1937323.076	2392394.891	1987151.96	1687908.372	3817800.491	2154450.711	3507260.541	39449617.67	2448229.756	1959603.176	1733167.43	2379931.848
A0A096MJZ2	Tbl2	RCG21429, isoform CRA_b OS=Rattus norvegicus OX=10116 GN=Tbl2 PE=1 SV=1	43	14	120	14	1	442	49.6	9.04	299.95	14	0	25282653.95	26507625.88	27991376.24	17595346	31138402.15	25620302.2	14612832.6	90580966.09	21130638.86	16200934.58	32236205.89	30339314.92
A0A096MK30	Msn	Moesin OS=Rattus norvegicus OX=10116 GN=Msn PE=1 SV=1	69	57	1266	43	1	577	67.8	6.47	3350.64	57	17	3817283087	5488310692	4323288359	4261778450	4019332676	4961369046	5683077918	216444007.4	3162335258	2715592772	3427402516	3398662326
A0A096MK41	LOC259245	Similar to alpha-2u-globulin OS=Rattus norvegicus OX=10116 GN=RGD1566134 PE=3 SV=1	43	6	20	6	1	181	20.9	5.92	40.57	6	0	857756.7812	216588.3281	1643387.194	609281.9292	525352.0661	2132242.339	3122541.361	154237873.3	1043824.83	2068624.549	3105984.311	2722774.716
A0A096MK46	Timm10b	Mitochondrial import inner membrane translocase subunit Tim10 B OS=Rattus norvegicus OX=10116 GN=Timm10b PE=1 SV=1	9	1	1	1	1	100	11.7	9.03	2.62	1	0	694143.6391	1061413.375	2627206.474	1188316.476	1024437.999	850711.5534	NA	NA	411748.6251	909850.0486	NA	NA
A0A096MK61	Crtap	Cartilage-associated protein-like 1 OS=Rattus norvegicus OX=10116 GN=Crtapl1 PE=1 SV=1	11	3	3	3	1	403	46.5	5.8	7.42	3	0	88643.50914	230244.6328	70226.03181	254154.7855	551641.3869	97040.60126	141237.918	99394.59879	264820.1096	544202.2434	647434.8983	409028.6479
A0A096MKA0	G6b	Megakaryocyte and platelet inhibitory receptor G6b OS=Rattus norvegicus OX=10116 GN=Mpig6b PE=4 SV=1	8	2	4	2	1	244	26.3	9.61	9.8	2	0	170988.0438	224067.5156	510085.0752	NA	NA	1253271.05	NA	NA	NA	NA	NA	NA
A0A096MKB0	Rab24	RAB24, member RAS oncogene family OS=Rattus norvegicus OX=10116 GN=Rab24 PE=1 SV=1	31	5	16	5	1	203	23.1	6.23	37.13	5	0	1556130.883	3371817.344	3635297.422	5462684.77	2582409.549	1174965.304	2432632.409	1899135.133	633524.621	1453314.477	2804824.704	2099259.579
A0A096MKC0	Gigyf2	Uncharacterized protein (Fragment) OS=Rattus norvegicus OX=10116 GN=Gigyf2 PE=1 SV=1	3	1	1	1	1	740	83.4	5.05	2.4	1	0	NA	NA	NA	NA	NA	NA	NA	NA	NA	NA	NA	NA
A0A096MKC1	Fyn	Tyrosine-protein kinase OS=Rattus norvegicus OX=10116 GN=Fyn PE=1 SV=1	26	14	124	6	1	534	60.1	6	233.04	14	0	2661761.917	3942006.359	4007995.293	3613850.535	5460216.001	4611507.849	2959001.412	502740.1142	2458848.558	2446430.628	2730064.33	1957036.8
A0A096MKE0	Asph	Aspartate-beta-hydroxylase OS=Rattus norvegicus OX=10116 GN=Asph PE=1 SV=1	30	17	140	17	1	737	82.6	5.08	367.89	17	0	24089407.66	27091588.6	24882770.07	21460600.67	23898318.41	21496185.85	14760609.56	28421909.2	10438295.22	10269212.95	19208559.11	32399060.62
A0A096MKG5	Nadk2	NAD kinase 2, mitochondrial OS=Rattus norvegicus OX=10116 GN=Nadk2 PE=1 SV=1	30	12	45	11	1	450	50.6	7.88	114.8	12	1	10663651.52	16569900.7	13346210.42	22170497.63	17214343.72	19404441.94	9870537.406	45170671.76	6218219.513	11694427.18	7676624.754	4125330.307
A0A096MKH2	Vta1	Similar to RIKEN cDNA 1110059P08 OS=Rattus norvegicus OX=10116 GN=Vta1 PE=1 SV=1	12	3	14	3	1	309	34	6.13	36.25	3	0	1698833.565	2299680.781	1628334.857	1588529.387	5055970.717	1447760.549	3719508.805	1960514.951	4760251.656	2090751.604	3918456.172	4513936.741
A0A096MKH3	Mctp2	Multiple C2 and transmembrane domain-containing 2 OS=Rattus norvegicus OX=10116 GN=Mctp2 PE=1 SV=1	1	1	1	1	1	878	100.1	6.98	1.79	1	0	NA	NA	NA	NA	NA	NA	NA	NA	NA	NA	NA	NA
A0A096P6L8	Fn1	Fibronectin OS=Rattus norvegicus OX=10116 GN=Fn1 PE=1 SV=2	36	61	935	2	1	2477	272.3	5.67	2299.78	61	59	89742867.11	110818596.1	109088534.7	100473207.1	99859516.61	174359967.4	207659135.6	81312160.59	235045858.3	560973130.5	405225445	263725620.6
A0A096P6L9	C5	Complement C5 OS=Rattus norvegicus OX=10116 GN=C5 PE=1 SV=2	27	38	341	38	1	1681	189	6.62	761.63	38	0	61066234.3	38557198.48	38753206.24	43194182.59	38800766.36	34649924.97	129915782.8	58914193.73	164383739.2	176397038.3	169111797.8	192003215
A0A096XKT2	COX3	Cytochrome c oxidase subunit 3 OS=Rattus norvegicus OX=10116 GN=COX3 PE=3 SV=1	5	1	48	1	1	261	29.9	7.14	132.57	1	0	26975134.95	30701267.5	64697780.52	47173738.53	41158501.76	32087636.21	5534595.467	19858298.67	17056875.84	33314958.1	44024805.34	21187335.61
A0A096XKT9	ND5	NADH-ubiquinone oxidoreductase chain 5 OS=Rattus norvegicus OX=10116 GN=ND5 PE=3 SV=1	7	4	30	1	1	609	68.5	9.26	70.52	4	3	13730394.76	13577827.56	34562101.7	21441167.85	17995247.15	21253207.53	7602813.939	16160483.77	11499400.04	30965736.33	20647572.52	9990812.695
A0A097PE04	COX2	Cytochrome c oxidase subunit 2 OS=Rattus norvegicus OX=10116 GN=COX2 PE=3 SV=1	23	4	90	1	1	227	25.9	4.73	172.11	4	0	36551.40297	398942.1875	76321.73195	95911.60565	798112.5961	50761.08977	2973068.361	3138388.171	112719.7797	9476899.507	3383632.404	1289525.639
A0A0A0MP80	Sidt2	SID1 transmembrane family member 2 OS=Rattus norvegicus OX=10116 GN=Sidt2 PE=1 SV=1	4	4	13	4	1	979	109.7	8.81	25.11	4	0	2860286.6	3063676.281	2879372.032	2506459.134	3551319.444	3632273.685	1450080.631	2992260.964	3546346.926	3676794.09	3633922.07	2309860.324
A0A0A0MP84	Pex5	Peroxisomal targeting signal 1 receptor OS=Rattus norvegicus OX=10116 GN=Pex5 PE=1 SV=1	12	5	5	5	1	641	71	4.56	11.25	5	0	266480.4846	237502.1563	168156.8862	326130.4226	447989.9534	296756.4678	310886.3237	1910685.106	597833.0966	201788.3739	268648.6596	573273.7427
A0A0A0MXU8	Cav2	Caveolin OS=Rattus norvegicus OX=10116 GN=Cav2 PE=1 SV=1	48	6	136	6	1	162	18.2	5.64	352.2	6	0	108897193.4	152050081.6	88072955.66	88227724.99	177284205.2	135271360.3	33065958.22	455104.5096	73535322.36	70597895.48	67717723.9	103386467.6
A0A0A0MXW1	Bckdhb	2-oxoisovalerate dehydrogenase subunit beta, mitochondrial OS=Rattus norvegicus OX=10116 GN=Bckdhb PE=1 SV=1	22	8	52	8	1	391	42.9	6.9	123.83	8	0	5288883.483	15637127.92	10252342.74	9910550.455	14837330.64	9491060.002	6929129.01	22418638.75	2702675.967	11203980.01	9997017.303	5511181.144
A0A0A0MXX5	Bdh2	3-hydroxybutyrate dehydrogenase type 2 OS=Rattus norvegicus OX=10116 GN=Bdh2 PE=1 SV=1	12	2	4	2	1	255	27.7	6.57	8.49	2	0	NA	NA	NA	NA	NA	NA	NA	258818.5694	328634.8754	208008.195	414110.4657	796997.3422
A0A0A0MXX7	Fxn	Frataxin, mitochondrial OS=Rattus norvegicus OX=10116 GN=Fxn PE=1 SV=2	6	1	1	1	1	208	23.1	8.81	3.33	1	0	286849.9181	739814.0625	598977.6148	801677.2851	554053.4918	487880.7607	649645.5069	NA	148627.9975	NA	NA	NA
A0A0A0MY00	Acadsb	Short/branched chain-specific acyl-CoA dehydrogenase, mitochondrial OS=Rattus norvegicus OX=10116 GN=Acadsb PE=1 SV=2	23	8	38	8	1	469	52	8.62	89.28	8	0	4443011.719	5932237.484	4437603.042	6641053.812	7410698.436	2710566.383	2893521.33	31300885.06	2044048.76	2748692.087	2337053.908	2801386.472
A0A0A0MY07	Usp15	Ubiquitin carboxyl-terminal hydrolase 15 OS=Rattus norvegicus OX=10116 GN=Usp15 PE=1 SV=1	3	2	6	2	1	952	109.2	5.11	15.13	2	0	267983.7493	250078.6563	190980.4676	251536.8915	973220.4737	322088.677	NA	1243577.836	904696.9011	NA	2729267	765378.3245
A0A0A0MY09	Hsp90b1	Endoplasmin OS=Rattus norvegicus OX=10116 GN=Hsp90b1 PE=1 SV=1	53	42	983	40	1	804	92.8	4.81	2625.09	42	0	984798506	991193500.2	1108988640	891384142.5	1208405271	955436351.1	1086446107	1991686651	586502476.3	749552186.9	1254514207	1105722578
A0A0A0MY22	Siae	Sialate O-acetylesterase OS=Rattus norvegicus OX=10116 GN=Siae PE=1 SV=1	12	5	16	5	1	542	60.5	7.55	35.55	5	0	3185832.584	1330994.594	2939614.413	3230292.729	3971397.463	1184285.837	1293218.183	8006305.84	451103.3191	3313882.73	2174955.693	1206193.713
A0A0A0MY24	Gzmbl3	Granzyme B-like 3 OS=Rattus norvegicus OX=10116 GN=Gzmbl3 PE=3 SV=2	9	2	3	2	1	248	27	9.28	6.42	2	0	335867.1011	1153738.438	1331504.111	1113070.019	641075.9459	1162424.53	NA	NA	NA	360320.4769	357002.7414	NA
A0A0A0MY43	Ascc3	Activating signal cointegrator 1 complex subunit 3 OS=Rattus norvegicus OX=10116 GN=Ascc3 PE=1 SV=1	1	2	8	2	1	2201	250.4	6.92	20.13	2	0	1112577.814	705617.1406	935368.5168	454506.119	981219.3874	746846.8493	1075449.454	1237945.703	1868063.263	1609209.92	NA	1166235.367
A0A0A1FZ34	COX1	Cytochrome c oxidase subunit 1 OS=Rattus norvegicus OX=10116 GN=COX1 PE=3 SV=1	2	1	12	1	1	514	56.9	6.8	10.07	1	0	15595494.99	20347201	34114639.35	31466859.59	17317496.57	18241982.81	3202679.997	14534141.88	4069389.09	11629417.91	22669921.35	14727973.49
A0A0A1FZ38	ND3	NADH-ubiquinone oxidoreductase chain 3 OS=Rattus norvegicus OX=10116 GN=ND3 PE=3 SV=1	13	1	32	1	1	115	13.1	4.44	76.53	1	0	3151392.498	3703891.75	5932105.168	6259110.605	4910836.984	4039182.329	1103240.235	3979060.103	1173743.944	2520431.719	4999899.69	3267152.375
A0A0B4J2J1	Fcgr3a	Fc fragment of IgG receptor IIIa OS=Rattus norvegicus OX=10116 GN=Fcgr3a PE=1 SV=1	15	3	21	3	1	249	28.1	8.25	43.96	3	0	715620.8263	1865366.25	820283.1822	1355210.755	1077185.622	2519343.159	3885706.931	3938881.731	1733419.399	1864599.84	3652685.851	2200050.075
A0A0F7R5I4	#N/A	Alanine/serine/cysteine/threonine transporter 1 OS=Rattus norvegicus OX=10116 GN=ratASCT1 PE=2 SV=1	9	4	30	4	1	529	55.8	6.11	65.37	4	0	1872816.406	1684513.68	3115320.545	1463843.665	1462581.386	1998168.414	2726253.327	1755477.056	4658549.644	2184134.086	2649894.341	4578310.011
A0A0F7RQJ6	Ddt	D-dopachrome tautomerase, isoform CRA_a OS=Rattus norvegicus OX=10116 GN=Ddt PE=1 SV=1	58	5	66	5	1	118	13.1	6.54	140.81	5	0	48459066.89	32665519.88	37426038.14	63850730.3	38581132.53	40076052.67	52259989.7	100740682.4	40845056.44	24393050.49	27554842.11	29816047.35
A0A0G2JSH2	Bdh1	3-hydroxybutyrate dehydrogenase, type 1, isoform CRA_a OS=Rattus norvegicus OX=10116 GN=Bdh1 PE=1 SV=1	40	12	38	12	1	344	38.3	8.84	86.32	12	0	3309250.075	2776599.188	5700169.294	3564410.962	2896597.895	2239121.585	2999835.447	267911665.9	2116763.487	4011128.115	4521005.74	4048683.95
A0A0G2JSH5	Alb	Serum albumin OS=Rattus norvegicus OX=10116 GN=Alb PE=1 SV=1	79	57	2207	2	1	608	68.7	6.48	6195.52	57	0	251064842.7	25243067.52	47653240.92	56295501.42	19624181.9	104935285.6	45446291.86	35087011.78	177996867.9	483901476.2	20687618.33	307832899.6
A0A0G2JSH9	Prdx2	Peroxiredoxin-2 OS=Rattus norvegicus OX=10116 GN=Prdx2 PE=1 SV=1	45	7	172	7	1	198	21.8	5.59	449.66	7	0	47726867.17	64655951.11	53594990.26	40402203.69	54316672.01	44101841.01	81005183.2	43438538.73	67920239.04	48901054.87	46886041.31	38825723.36
A0A0G2JSI0	Fmo3	Dimethylaniline monooxygenase [N-oxide-forming] OS=Rattus norvegicus OX=10116 GN=Fmo3 PE=1 SV=1	43	20	219	20	1	531	59.9	8.05	475.07	20	0	99078714.26	100263880.5	83028964.68	78433219.8	102829335.8	76104337.61	71263953.25	573266023	45489087.71	27132715.86	62472161.3	97869698.02
A0A0G2JSI1	Aldh9a1	4-trimethylaminobutyraldehyde dehydrogenase OS=Rattus norvegicus OX=10116 GN=Aldh9a1 PE=1 SV=1	38	17	177	17	1	497	54	6.67	392.37	17	0	76363692.56	104980383.1	89870300.82	93964380.61	96823198.4	75137555.1	81778038.83	120234486.1	70643892.47	81912956.26	69018057.52	69646597.83
A0A0G2JSI4	Adgre5	Adhesion G protein-coupled receptor E5 OS=Rattus norvegicus OX=10116 GN=Adgre5 PE=1 SV=1	12	8	68	8	1	903	99.3	8.18	122.33	8	0	15723661.66	19208863.84	19319538.11	8650328.656	12067729.44	14907248.64	5591607.233	3196779.531	4344874.109	4250863.291	6501164.708	8770892.948
A0A0G2JSJ1	Tacstd2	Tumor-associated calcium signal transducer 2 OS=Rattus norvegicus OX=10116 GN=Tacstd2 PE=4 SV=1	23	7	43	7	1	317	35.5	8.6	109.01	7	0	2830747.082	6089108.5	3416433.783	2456933.896	3021884.612	2933202.015	7782836.533	1208822.041	6669361.667	4715774.591	4308327.107	2315107.752
A0A0G2JSJ2	Cmpk1	UMP-CMP kinase OS=Rattus norvegicus OX=10116 GN=Cmpk1 PE=1 SV=1	30	6	48	6	1	227	25.8	8.03	92.35	6	0	9568206.582	5916812.125	7612122.208	8770077.31	8938865.891	8728106.487	9115601.878	11482581.86	9932004.602	9775001.459	8595544.674	4951152.92
A0A0G2JSJ5	Antxr1	Anthrax toxin receptor 1 OS=Rattus norvegicus OX=10116 GN=Antxr1 PE=1 SV=1	2	1	1	1	1	576	63.8	8	2.86	1	0	NA	450601.75	371599.8474	NA	NA	407227.1493	NA	NA	NA	NA	NA	NA
A0A0G2JSJ8	Fuca1	Alpha-L-fucosidase OS=Rattus norvegicus OX=10116 GN=Fuca1 PE=1 SV=1	11	4	24	4	1	462	53.4	6.24	47.31	4	0	3816278.85	4069410.469	4586925.783	5724505.987	3703342.754	6916027.048	1153627.863	1940212.583	1465224.596	6140686.708	2146412.078	1342704.831
A0A0G2JSK1	Serpina3c	RCG20603 OS=Rattus norvegicus OX=10116 GN=Serpina3c PE=3 SV=1	41	17	289	2	1	416	46.4	5.44	749.67	17	0	6785660.795	6758807.5	2573762.261	2546349.897	734130.2535	3889354.271	8424093.845	3002262.649	7601357.394	23912702.31	856784.2234	13954567.02
A0A0G2JSK5	Itgb1	Integrin beta OS=Rattus norvegicus OX=10116 GN=Itgb1 PE=1 SV=1	36	26	555	26	1	798	88.3	6.01	1431.2	26	0	356973703.6	403180160.5	303698257.1	255416543.3	339583745.7	424556635.8	258463424.6	88340052.68	377341235.6	272688759.3	372961592.7	424277671.6
A0A0G2JSK9	Bhmt	Betaine--homocysteine S-methyltransferase 1 OS=Rattus norvegicus OX=10116 GN=Bhmt PE=1 SV=1	71	21	85	17	1	407	45	7.9	273.62	21	4	2455563.909	3208519.492	7653568.332	8174565.386	3853967.82	12217137.53	5465848.949	2634793590	9051693.932	3516096.492	16025222.25	17824739.44
A0A0G2JSL0	LOC100360846	Proteasome subunit beta OS=Rattus norvegicus OX=10116 GN=LOC100360846 PE=3 SV=1	18	4	18	4	1	238	25.3	5	45.72	4	0	10049741.17	11661897.63	12884118.44	22913278.63	12294905.15	14390502.37	13515787.95	15742697.28	11953767.25	6607127.725	7521118.657	5887234.192
A0A0G2JSL2	Trappc4	RCG58353, isoform CRA_e OS=Rattus norvegicus OX=10116 GN=Trappc4 PE=1 SV=1	35	7	23	7	1	219	24.4	6.21	59.2	7	0	7680581.288	5988343.25	4762793.271	7064290.029	7820742.147	2930153.721	4870134.017	1055775.061	7257922.586	11780967.19	6606514.215	6207120.573
A0A0G2JSL4	Tsc2	Tuberin OS=Rattus norvegicus OX=10116 GN=Tsc2 PE=1 SV=1	4	4	14	4	1	1809	201.1	7.18	33.78	4	0	NA	NA	2249226.38	1968695.574	2502017.651	3513833.512	NA	1820458.186	1045070.529	590082.1671	477179.9617	1131921.729
A0A0G2JSM0	Dnajc2	DnaJ (Hsp40) homolog, subfamily C, member 2 OS=Rattus norvegicus OX=10116 GN=Dnajc2 PE=1 SV=1	4	2	2	2	1	621	71.8	8.85	4.39	2	0	9935.852132	26253.82617	9313.612179	11736.65385	39223.86957	8159.245621	660026.3379	158112.9893	463298.4632	NA	NA	NA
A0A0G2JSM2	Aspg	60 kDa lysophospholipase OS=Rattus norvegicus OX=10116 GN=Aspg PE=1 SV=1	2	1	1	1	1	564	60.8	5.77	2.54	1	0	NA	NA	NA	NA	745250.2213	NA	583612.4905	1100303.774	1074303.064	NA	753851.2321	757349.5384
A0A0G2JSM4	Bet1l	BET1-like protein OS=Rattus norvegicus OX=10116 GN=Bet1l PE=1 SV=1	31	2	12	2	1	111	12.4	8.82	29.46	2	0	1710920.987	1997297.625	1703545.566	2160810.815	3388631.667	2592981.403	1395684.316	717933.2041	2175209.065	2479910.759	1040503.012	1288876.997
A0A0G2JSM7	Add1	Adducin 1 (Alpha), isoform CRA_b OS=Rattus norvegicus OX=10116 GN=Add1 PE=1 SV=1	37	20	145	19	1	735	80.3	6.15	391.83	20	1	47333955.07	46797270	40096242.71	40744919.98	60538485.18	54092778.85	26343720.95	4993763.387	25401406.43	26240997.25	25084089.14	34893225.05
A0A0G2JSN3	Slc6a12	Transporter OS=Rattus norvegicus OX=10116 GN=Slc6a12 PE=1 SV=1	5	3	5	3	1	628	71.2	6.64	14.73	3	0	NA	NA	NA	NA	NA	NA	214704.1818	2896028.43	NA	NA	NA	NA
A0A0G2JSN6	Adgrg3	Adhesion G protein-coupled receptor G3 OS=Rattus norvegicus OX=10116 GN=Adgrg3 PE=3 SV=1	3	1	7	1	1	547	60.8	6.79	18.34	1	0	561186.1381	579934.1875	892713.3828	822021.7406	694058.8981	977867.5795	NA	NA	NA	452620.0936	NA	NA
A0A0G2JSN8	Pdpn	Podoplanin OS=Rattus norvegicus OX=10116 GN=Pdpn PE=4 SV=1	7	1	3	1	1	166	17.6	4.94	9.02	1	0	2942728.002	2950327.125	3460954.544	1490655.583	3691125.978	1466078.31	2055573.43	667112.3873	2463452.677	2509221.257	2956143.967	3924267.608
A0A0G2JSP4	Hyal3	Hyaluronidase-3 OS=Rattus norvegicus OX=10116 GN=Hyal3 PE=3 SV=1	3	1	1	1	1	412	46.1	8.43	3	1	0	NA	NA	NA	NA	NA	NA	NA	NA	165380.9307	700924.0889	484333.8651	NA
A0A0G2JSP8	Ckm	Creatine kinase M-type OS=Rattus norvegicus OX=10116 GN=Ckm PE=1 SV=1	33	10	38	10	1	381	43	7.06	100.51	10	0	2877216.787	3704600.492	40885521.45	7638097.243	9200193.639	5995214.352	2213803.459	257345.4359	1318516.013	996098.3841	2443413.991	7917083.157
A0A0G2JSQ2	Fmo5	Dimethylaniline monooxygenase [N-oxide-forming] OS=Rattus norvegicus OX=10116 GN=Fmo5 PE=1 SV=1	24	11	71	1	1	533	60	8.41	194.77	11	0	2025055.148	1577572.75	1818750.574	1631893.74	2132068.903	427256.4616	1013103.217	35208188.6	1170256.934	1729597.244	4459590.642	1314976.104
A0A0G2JSQ4	Tpm1	Tropomyosin 1, alpha, isoform CRA_p OS=Rattus norvegicus OX=10116 GN=Tpm1 PE=1 SV=1	50	18	315	0	1	248	28.5	4.77	816.02	18	3	45169493.57	56846192.44	58195377.2	45826109.3	84789756.33	57545941.48	53725743.49	26986075.98	36289196.95	43866188.02	52714970.27	42138133.41
A0A0G2JSQ6	Smad1	Mothers against decapentaplegic homolog OS=Rattus norvegicus OX=10116 GN=Smad1 PE=1 SV=1	6	2	3	1	1	468	52.5	7.31	5.88	2	0	NA	NA	NA	NA	199046.077	NA	490267.1845	NA	471406.0481	295560.9762	NA	657462.264
A0A0G2JSQ9	Pelp1	Proline-, glutamic acid- and leucine-rich protein 1 OS=Rattus norvegicus OX=10116 GN=Pelp1 PE=1 SV=1	2	2	4	2	1	1177	124.1	4.4	9.84	2	0	456154.5289	248099.9844	116003.5833	341016.44	205458.4638	NA	712652.9319	NA	564130.6834	706282.2759	2888523.089	1580477.448
A0A0G2JSR0	Vdac3	Voltage-dependent anion-selective channel protein 3 OS=Rattus norvegicus OX=10116 GN=Vdac3 PE=1 SV=1	56	13	268	12	1	283	30.8	8.59	723.39	13	0	58364876.13	90047599.02	89326583.21	84145465.11	93393399.22	74268516.03	70265735.15	69741132.04	46029262.91	96280886.19	140462740	96807159.14
A0A0G2JSR4	Stat5b	Signal transducer and activator of transcription OS=Rattus norvegicus OX=10116 GN=Stat5b PE=1 SV=1	19	13	60	2	1	786	90	6.05	130.52	13	10	7256133.421	6894617.172	4358201.955	5559126.55	12584154.45	8178486.292	6343442.106	125266882.4	23019234.82	11567968.34	8206229.943	7692549.37
A0A0G2JSR7	Matr3	Matrin-3 OS=Rattus norvegicus OX=10116 GN=Matr3 PE=1 SV=1	5	3	3	3	1	845	94.4	6.25	6.93	3	0	NA	81913.46875	NA	NA	58365.89243	NA	338188.7991	62908.26956	55831.46426	178613.8686	266817.7829	124246.8
A0A0G2JSR9	Sdf4	45 kDa calcium-binding protein OS=Rattus norvegicus OX=10116 GN=Sdf4 PE=1 SV=1	5	2	14	2	1	382	44.3	5.17	35.86	2	0	5168483.449	2579962.188	5673938.513	4589204.73	4201813.986	6297788.05	5916092.774	4691032.471	3761127.928	3493724.662	5155882.247	5584639.298
A0A0G2JSS3	Slc22a18	Solute carrier family 22 member 18 OS=Rattus norvegicus OX=10116 GN=Slc22a18 PE=1 SV=1	9	3	39	3	1	412	43.8	9.45	102.98	3	0	3500699.34	3199162.625	4474770.76	2749467.262	4245201.934	3603580.174	1747213.032	16490292.7	4056615.177	2281625.533	4929139.914	4920651.916
A0A0G2JSS8	Prdx5	Peroxiredoxin 5, isoform CRA_c OS=Rattus norvegicus OX=10116 GN=Prdx5 PE=1 SV=1	44	10	154	10	1	213	22.2	8.66	368.1	10	0	36233609.74	41492928.2	85552550.25	74046361.98	39204259.55	53881227.11	34444130.53	52859446.56	36090458.25	36381436.46	31124226.42	22516088.44
A0A0G2JSS9	Atl3	Atlastin-3 OS=Rattus norvegicus OX=10116 GN=Atl3 PE=1 SV=1	32	12	232	12	1	536	60.2	5.55	612.56	12	0	72127275.11	74958326.81	67230666.04	54324154.13	64669593.83	75995655.9	68171473.85	148186995.4	82580138.49	79044211.29	64376192.87	80963132.89
A0A0G2JST1	Adgrg6	Adhesion G protein-coupled receptor G6 OS=Rattus norvegicus OX=10116 GN=Adgrg6 PE=1 SV=1	1	1	2	1	1	1193	133.1	7.02	4.11	1	0	NA	NA	NA	NA	NA	NA	NA	NA	NA	NA	NA	NA
A0A0G2JST3	Krt1	Keratin, type II cytoskeletal 1 OS=Rattus norvegicus OX=10116 GN=Krt1 PE=1 SV=1	10	7	99	5	1	625	64.7	7.93	228.95	7	0	16471796.18	49525989.41	18566390.19	15825471.42	16553301.4	145623854.6	15142201.49	154612093	74188782.31	99455943.77	145958846.1	44693715.95
A0A0G2JSU2	Adgra3	Adhesion G protein-coupled receptor A3 OS=Rattus norvegicus OX=10116 GN=Adgra3 PE=3 SV=1	1	1	1	1	1	1306	143.6	8.54	2.06	1	0	1854296.268	3193544.5	1136849.548	804057.9908	1514619.369	952018.2067	1365590.872	NA	2545362.771	1213428.245	NA	NA
A0A0G2JSU3	Set	Protein SET OS=Rattus norvegicus OX=10116 GN=Set PE=1 SV=1	21	6	48	6	1	289	33.4	4.31	118.81	6	0	30579897.52	25011378.12	15766936.94	16005771.37	21363735.41	13357628.29	35488212.96	26631546.31	25157148.31	17604694.01	24131987.63	18441964.85
A0A0G2JSU8	Cyp2d1	Cytochrome P450 2D3 OS=Rattus norvegicus OX=10116 GN=Cyp2d1 PE=1 SV=1	48	20	60	5	1	504	57.1	7.3	160.93	20	10	1924006.592	1330571.633	1850050.869	1404464.443	2806697.907	1501165.997	1365187.927	587830726.1	3927346.231	1966669.18	1850303.004	3739603.597
A0A0G2JSV0	Ndrg2	N-myc downstream regulated gene 2, isoform CRA_a OS=Rattus norvegicus OX=10116 GN=Ndrg2 PE=1 SV=1	17	4	7	4	1	371	40.7	5.3	18.54	4	0	201647.9822	NA	890103.3429	1247923.141	411171.1246	518077.2418	86668.18413	4336473.045	1215802.336	258948.0631	NA	NA
A0A0G2JSV5	Haao	3-hydroxyanthranilate 3,4-dioxygenase OS=Rattus norvegicus OX=10116 GN=Haao PE=1 SV=1	10	2	2	2	1	286	32.5	5.67	6.65	2	0	NA	NA	60925.72734	NA	NA	NA	NA	1897289.93	NA	NA	NA	NA
A0A0G2JSV6	Hba2	Globin c2 OS=Rattus norvegicus OX=10116 GN=Hba-a2 PE=1 SV=1	90	11	766	9	1	142	15.3	8.31	2526.4	11	2	11528905502	6817361986	10231012457	15715069514	5880069097	8210268558	9954869189	2774985939	6385250479	5471507922	2659532241	6374404153
A0A0G2JSW0	Myl12b	Myosin regulatory light chain 12B OS=Rattus norvegicus OX=10116 GN=Myl12b PE=4 SV=1	63	10	232	1	1	172	19.8	4.84	640.47	10	8	115349380.5	164880157.5	127612066.1	134258807.4	136421173.7	131927855.7	208779803.4	61307675.25	230664706.9	248103937.1	181959277.5	147871585.3
A0A0G2JSW3	Hbb	Globin a4 OS=Rattus norvegicus OX=10116 GN=Hbb PE=1 SV=1	79	17	1291	5	1	147	16	8.07	3432.86	17	12	22458125228	15571380523	14444901515	20421232827	11631838416	16525608350	12947077974	7069744038	15405706497	11994825606	8492560615	13681290910
A0A0G2JSX5	Ednra	Endothelin-1 receptor OS=Rattus norvegicus OX=10116 GN=Ednra PE=3 SV=1	2	1	2	1	1	426	48.2	8.24	4.63	1	0	2880143.179	3900643.125	6388913.514	5491803.899	4358810.703	7001287.132	5974015.513	4607664.585	6849660.087	6714785.762	7261206.71	4796698.961
A0A0G2JSY3	Nln	Neurolysin (Metallopeptidase M3 family), isoform CRA_a OS=Rattus norvegicus OX=10116 GN=Nln PE=1 SV=1	23	13	73	13	1	704	80.2	6.47	150.65	13	0	8204271.845	14990754.94	13483296.29	19453265.49	16417976.71	14944890.05	9327800.078	12885347.64	7499763.577	13341220.22	14371068.29	13732537.88
A0A0G2JSZ1	Rab31	Ras-related protein Rab-31 OS=Rattus norvegicus OX=10116 GN=Rab31 PE=4 SV=1	38	6	70	4	1	195	21.5	7.12	175.85	6	0	7171702.46	6457527.75	5967221.144	5973845.962	8651343.291	7133919.797	10996213.97	625458.7745	8252141.377	6484674.168	8212498.259	9770112.724
A0A0G2JSZ5	Pdia6	Protein disulfide-isomerase A6 OS=Rattus norvegicus OX=10116 GN=Pdia6 PE=1 SV=1	45	20	455	20	1	445	48.7	5.19	1367.22	20	0	299882298.6	359649708	365334719.9	337472048.3	472478120.9	342712249.6	494718462.2	665277198.2	274952279.7	507959348.7	534683058.4	446725843.3
A0A0G2JSZ9	Ccs	Copper chaperone for superoxide dismutase OS=Rattus norvegicus OX=10116 GN=Ccs PE=1 SV=1	10	2	3	2	1	274	28.9	6.21	7.94	2	0	1116330.025	980267.3125	1659982.219	1520539.373	1285512.94	547458.4474	1449372.534	1487542.914	1386450.596	778891.7486	1662529.232	945296.3846
A0A0G2JT06	Gps1	COP9 signalosome complex subunit 1 OS=Rattus norvegicus OX=10116 GN=Gps1 PE=1 SV=1	11	5	25	5	1	526	58.8	6.74	59.61	5	0	7045799.14	10481531.63	5006126.664	6813425.894	13841039.79	8803868.719	7476852.576	10593884.6	11251477.18	7922906.136	7919364.637	8122009.105
A0A0G2JT24	Ankdd1b	Uncharacterized protein OS=Rattus norvegicus OX=10116 GN=Ankdd1b PE=4 SV=1	3	1	1	1	1	394	43.5	7.61	0	1	0	115337738.9	114320184	141244501.2	167307210.4	94050337.16	139037355.9	46916505.04	107747391.1	62870091.49	106556913.7	101870328.3	67706515.37
A0A0G2JT33	Tep1	Telomerase protein component 1 OS=Rattus norvegicus OX=10116 GN=Tep1 PE=1 SV=1	2	3	3	3	1	2641	292.8	7.66	8.1	3	0	48570.76321	26718.63086	62430.57621	464153.3232	NA	64596.38002	820862.5869	96731.44087	1048891.431	1104541.734	508276.7625	798793.3972
A0A0G2JT50	Gas7	Growth arrest-specific protein 7 OS=Rattus norvegicus OX=10116 GN=Gas7 PE=4 SV=1	11	3	3	3	1	423	48.4	8	8.46	3	0	558301.7896	389623.875	283467.7614	246504.7833	260637.0691	197237.6285	412031.8636	NA	903078.8522	588428.7169	713059.1444	1053561.005
A0A0G2JT62	Ptprf	Receptor-type tyrosine-protein phosphatase F OS=Rattus norvegicus OX=10116 GN=Ptprf PE=1 SV=1	7	9	42	8	1	1904	212	6.7	104.25	9	1	3148416.509	3630561.891	2409768.393	2910442.354	3590254.099	2895727.653	2983441.918	2648153.688	4200191.577	3311749.458	3602460.665	2822747.592
A0A0G2JT63	Cyfip2	Cytoplasmic FMR1-interacting protein 2 OS=Rattus norvegicus OX=10116 GN=Cyfip2 PE=4 SV=1	16	12	134	3	1	967	112	7.43	263.22	12	0	26601.98921	34027.79688	972892.2705	32575.80022	449440.7727	1356247.965	576023.3577	NA	893215.6993	401370.7045	617269.5792	139461.7173
A0A0G2JT78	Rab6b	RAB6B, member RAS oncogene family OS=Rattus norvegicus OX=10116 GN=Rab6b PE=4 SV=1	48	8	159	4	1	208	23.4	5.53	335.82	8	0	5780187.258	6215239.813	7015818.432	5352247.55	8893100.124	6367749.968	6164842.568	NA	5512681.635	4369070.899	8158441.947	8115651.184
A0A0G2JT93	Ctnnb1	Catenin (Cadherin associated protein), beta 1, isoform CRA_a OS=Rattus norvegicus OX=10116 GN=Ctnnb1 PE=1 SV=1	34	22	338	18	1	781	85.4	5.86	843.04	22	0	63807566.18	64183507.9	63987931.27	64588646.35	70915950.89	65591086.91	40336014.29	59634061.08	67002654.08	83158039.51	65512734.34	59327046.06
A0A0G2JTA0	Faf2	FAS-associated factor 2 OS=Rattus norvegicus OX=10116 GN=Faf2 PE=1 SV=1	26	7	70	7	1	445	52.4	5.47	161.84	7	0	6701378.361	8771962.563	6081157.706	6561056.172	12788518.54	7277152.356	8129690.751	10316196.28	6897768.658	5074933.725	12388283.34	16275125.4
A0A0G2JTA1	Ppp2r5e	Serine/threonine-protein phosphatase 2A 56 kDa regulatory subunit OS=Rattus norvegicus OX=10116 GN=Ppp2r5e PE=1 SV=1	11	4	27	3	1	467	54.7	6.95	67.18	4	0	3620461.196	3631868.656	2122950.793	2281549.034	4569187.811	2499409.46	4404775.054	967989.2379	3326530.763	2165008.303	5026793.129	3169024.576
A0A0G2JTA7	Rasal2	RAS protein activator-like 2 OS=Rattus norvegicus OX=10116 GN=Rasal2 PE=1 SV=1	3	3	6	3	1	1279	143.6	7.55	12.81	3	0	1497688.006	1290170.844	636358.2369	1376539.637	1359725.505	1524670.737	801045.7112	NA	1012297.598	264767.0703	787607.4672	1548937.162
A0A0G2JTB7	Ptpn21	Tyrosine-protein phosphatase non-receptor type OS=Rattus norvegicus OX=10116 GN=Ptpn21 PE=1 SV=1	2	2	5	2	1	1175	133.4	7.94	13.96	2	0	84309.09631	199198.0625	57281.54762	76145.97965	199855.8935	59753.02976	97129.38958	55064.60766	121538.6347	109907.5014	144461.3618	152484.2556
A0A0G2JTF2	Dab2ip	Disabled homolog 2-interacting protein OS=Rattus norvegicus OX=10116 GN=Dab2ip PE=1 SV=1	1	1	1	1	1	1161	128	7.11	1.96	1	0	151460.6995	260296.2969	NA	190791.4208	261587.847	248127.1543	279711.1696	NA	296681.4654	300111.4422	322387.0486	281872.8371
A0A0G2JTG7	Hnrnph1	Heterogeneous nuclear ribonucleoprotein H OS=Rattus norvegicus OX=10116 GN=Hnrnph1 PE=1 SV=1	25	8	88	3	1	449	49.2	6.3	220.51	8	3	24675826.1	27304715.6	17922910.99	18737294.39	35587723.38	27165744.18	16551244.47	10186619.63	21457029.52	14875775.92	24307537.84	21910942.7
A0A0G2JTK4	Ppp6r1	Protein phosphatase 6, regulatory subunit 1 OS=Rattus norvegicus OX=10116 GN=Ppp6r1 PE=1 SV=1	3	3	12	3	1	886	97.7	4.65	26.17	3	0	2204303.105	1914879.781	1994799.69	1762450.165	2646457.034	2871416.727	3691311.956	1370715.127	3465950.955	2859932.545	1092970.95	2409781.312
A0A0G2JTL5	Pc	Pyruvate carboxylase, mitochondrial OS=Rattus norvegicus OX=10116 GN=Pc PE=1 SV=1	32	33	234	33	1	1277	139.9	6.77	547.03	33	0	17637183.9	29583063.88	43704544.56	39684666.43	36805346.45	27179370.34	36607667.82	307570230	40738740.8	58281764.78	47973305.24	36592797.47
A0A0G2JTL6	Card6	Caspase recruitment domain family, member 6 OS=Rattus norvegicus OX=10116 GN=Card6 PE=1 SV=1	2	1	7	1	1	1126	124.9	6.81	18.26	1	0	214666.358	4229.487305	55913.817	NA	NA	120289.1476	283879.6907	335307.858	480120.5742	140680.8667	NA	NA
A0A0G2JTM1	Diaph2	Uncharacterized protein OS=Rattus norvegicus OX=10116 PE=1 SV=1	4	3	9	3	1	706	80.2	5.96	17.34	3	0	862815.0116	1184255.531	1489573.977	1329759.527	1475987.736	1001293.235	1162767.134	1058785.329	1876928.313	2732742.235	4013343.372	3436773.195
A0A0G2JTM9	Dnajb14	DnaJ heat shock protein family (Hsp40) member B14 OS=Rattus norvegicus OX=10116 GN=Dnajb14 PE=4 SV=1	4	1	1	1	1	377	42.1	8.65	3.56	1	0	NA	NA	NA	117638.6743	NA	132907.3347	NA	47176.71772	NA	NA	NA	NA
A0A0G2JTN7	Ntn4	Netrin 4 OS=Rattus norvegicus OX=10116 GN=Ntn4 PE=4 SV=1	3	1	1	1	1	631	70.3	8.02	0	1	0	NA	NA	13164.06	28021.25827	28015.63038	26085.97914	NA	NA	NA	34579.05004	NA	NA
A0A0G2JTR4	Abr	ABR, RhoGEF and GTPase-activating protein OS=Rattus norvegicus OX=10116 GN=Abr PE=1 SV=1	10	7	47	6	1	842	95.6	6.48	88.36	7	1	4026976.429	4256522.547	2984012.773	4115609.502	5626541.746	3639643.818	7758712.524	462269.8114	8369513.268	5835116.095	7089736.165	6655176.326
A0A0G2JTS3	Vps29	Vacuolar protein sorting-associated protein 29 OS=Rattus norvegicus OX=10116 GN=Vps29 PE=1 SV=1	25	5	77	5	1	209	23.6	7.37	162.82	5	0	69101178.58	40459169.13	91910102.61	83601050.66	51787479.87	46862940.09	34072757.37	26328908.56	67143293.39	53949403.79	52694834.05	60827912.61
A0A0G2JTT2	Picalm	Phosphatidylinositol binding clathrin assembly protein, isoform CRA_a OS=Rattus norvegicus OX=10116 GN=Picalm PE=1 SV=1	22	11	92	11	1	655	71	8.37	257.94	11	0	24408509.29	26386823.67	32615889.34	33236895.61	24043444.9	24379253.61	26527019.71	14979374.7	30624228.62	29595268	22607310.02	35315851.03
A0A0G2JTU0	Arhgef15	Rho guanine nucleotide exchange factor 15 OS=Rattus norvegicus OX=10116 GN=Arhgef15 PE=1 SV=1	8	4	9	4	1	850	92.9	8.1	19.25	4	0	1756793.7	2406108.313	1876464.659	2210964.86	2089586.571	2383543.925	NA	NA	NA	628083.3548	759346.8904	1768848.83
A0A0G2JTW1	Rap2a	RAS related protein 2a OS=Rattus norvegicus OX=10116 GN=Rap2a PE=4 SV=1	32	5	43	3	1	183	20.6	4.82	91.12	5	2	14757601.94	17680143.33	15755937.24	13997344.24	17359029.35	19753216.96	11080840.45	3553063.634	18473296.83	9812401.812	19981463.82	17186483.06
A0A0G2JTW9	Hbb-b1	Beta-globin OS=Rattus norvegicus OX=10116 GN=Hbb-b1 PE=1 SV=1	53	10	598	2	1	147	16	8.06	1396.75	10	0	174555631.3	116426601	126218745	201644373.1	75824449.86	106448083.7	101574427.7	75504175.82	104182315.3	103650246.5	45832248.12	69221477.69
A0A0G2JTX2	Praf2	PRA1 family protein OS=Rattus norvegicus OX=10116 GN=Praf2 PE=1 SV=1	6	1	13	1	1	178	19.5	9.23	29.66	1	0	1247591.323	1859691.32	3439459.612	2167828.105	2233146.104	2390224.548	3105455.133	NA	2670066.499	1998019.433	NA	4895848.041
A0A0G2JTX3	#N/A	Uncharacterized protein OS=Rattus norvegicus OX=10116 PE=4 SV=1	13	1	1	1	1	101	10.2	11.03	2.43	1	0	1318454.727	1873839	NA	NA	1421290.178	781357.126	NA	NA	1746038.904	960774.317	785185.5342	1315098.888
A0A0G2JTX7	Col6a5	Collagen type VI alpha 5 chain OS=Rattus norvegicus OX=10116 GN=Col6a5 PE=1 SV=1	15	34	300	32	1	2632	288.8	6.39	733.24	34	2	38382238.21	54133726.91	43683410.83	60810701.22	34820549.97	47072291.8	45268667.3	3645319.887	29974604.15	108037659.7	92498111.86	61871851.15
A0A0G2JTX9	Derl2	Derlin OS=Rattus norvegicus OX=10116 GN=Derl2 PE=1 SV=1	17	2	4	2	1	239	27.6	7.28	4.69	2	0	287481.3394	330716	286632.785	NA	NA	NA	NA	979321.4106	NA	NA	820467.0661	593511.7004
A0A0G2JTY2	Hk3	Hexokinase-3 OS=Rattus norvegicus OX=10116 GN=Hk3 PE=1 SV=1	6	4	9	3	1	963	104.5	5.58	21.31	4	0	NA	NA	NA	48450.06621	69332.87987	NA	1050233.243	NA	2085209.678	1792472.444	NA	911562.2715
A0A0G2JTY3	Slc37a4	Solute carrier family 37 member 4 OS=Rattus norvegicus OX=10116 GN=Slc37a4 PE=1 SV=1	12	4	8	4	1	450	48.6	8.32	22.84	4	0	1423517.693	896949.0938	1300770.721	979220.2481	1191654.595	1257148.297	506323.9597	41912473.89	869051.149	471993.1043	1379402.345	746484.9617
A0A0G2JU05	Llgl2	LLGL2, scribble cell polarity complex component OS=Rattus norvegicus OX=10116 GN=Llgl2 PE=1 SV=1	38	29	303	29	1	1077	119.6	8.19	759.84	29	0	56728444.49	67557606.66	43617285.79	40356798.44	61429901.97	46425338.75	93369907.73	26500599.92	77785896.8	24475058.22	52670381.77	71054313.87
A0A0G2JU12	Mgst2	Microsomal glutathione S-transferase 2 OS=Rattus norvegicus OX=10116 GN=Mgst2 PE=1 SV=1	20	2	49	2	1	128	14.8	9.77	81.43	2	0	6245349.126	9255718.75	7669913.613	7502235.76	8570109.7	4963751.948	2202874.191	16411370.19	2575813.573	7756597.407	10543149.49	8065601.299
A0A0G2JU15	Ptcd3	Pentatricopeptide repeat domain 3 OS=Rattus norvegicus OX=10116 GN=Ptcd3 PE=1 SV=1	5	3	6	3	1	747	84.5	6.62	12.85	3	0	279939.0003	622090.4922	565757.7594	523743.6135	683759.0186	223793.7303	1054056.559	723635.629	359744.8834	463349.2649	270726.459	652427.0538
A0A0G2JU46	Prss23	Serine protease 23 OS=Rattus norvegicus OX=10116 GN=Prss23 PE=4 SV=1	5	2	16	1	1	392	44.1	9.5	27.2	2	0	762383.7961	530651.0313	286780.4438	NA	430537.5853	305070.6518	353823.2849	NA	NA	328272.189	113756.0719	416947.2015
A0A0G2JU49	Mtx1	Metaxin 1 OS=Rattus norvegicus OX=10116 GN=Mtx1 PE=1 SV=1	11	5	39	5	1	463	51.9	9.28	76.4	5	0	4608336.328	5151651.375	4376474.615	5741158.948	5392651.167	3626176.104	2990559.759	4616447.541	1640245.825	3690347.159	3696529.161	3311369.759
A0A0G2JU56	Mark3	Non-specific serine/threonine protein kinase OS=Rattus norvegicus OX=10116 GN=Mark3 PE=1 SV=1	8	4	9	3	1	798	89	9.54	27.42	4	1	924273.1353	1983912.445	2056275.865	822046.6492	2745647.935	1224730.04	27446950.57	387370.9728	6832494.623	6267926.425	947033.4703	1468818.492
A0A0G2JU66	Nploc4	Nuclear protein localization protein 4 homolog OS=Rattus norvegicus OX=10116 GN=Nploc4 PE=1 SV=1	12	6	21	6	1	608	68	6.49	33.33	6	0	1549630.465	1155572.164	1239908.203	1161262.293	1193258.93	1117151.187	3904261.217	2119336.26	4687112.935	3008294.765	2234547.822	2717593.539
A0A0G2JU73	Trip12	E3 ubiquitin-protein ligase TRIP12 OS=Rattus norvegicus OX=10116 GN=Trip12 PE=1 SV=1	3	4	12	4	1	2038	225.5	8.5	26.97	4	0	3185654.746	4479709.611	5529723.661	5108916.501	4340918.512	4543503.839	1712189.009	893537.756	914740.8513	4942503.106	6937225.634	5836241.367
A0A0G2JU77	Eif3k	Eukaryotic translation initiation factor 3 subunit K OS=Rattus norvegicus OX=10116 GN=Eif3k PE=1 SV=1	29	4	15	4	1	215	24.8	4.97	30.56	4	0	1925647.639	1002159.5	2381433.466	1650500.54	1792162.895	810521.2198	3233805.198	4534270.321	3307842.381	2497791.02	1916023.446	3073380.95
A0A0G2JUA5	Ahnak	AHNAK nucleoprotein OS=Rattus norvegicus OX=10116 GN=Ahnak PE=1 SV=1	69	178	2373	155	1	5450	580.8	6.14	5602.86	178	22	790358116.1	1076792331	1185609083	1092242428	776792172.1	1112323347	1659534722	41542702.36	955676821.8	563075945.1	707878200.1	835773370.5
A0A0G2JUB0	Fam3c	Protein FAM3C OS=Rattus norvegicus OX=10116 GN=Fam3c PE=1 SV=1	19	4	12	4	1	227	24.7	8.03	24.9	4	0	6002724.611	7823679.625	10506492.72	5812823.947	7823940.392	8160746.781	6215823.427	1323982.484	3357347.591	4932050.735	4669992.291	7019410.66
A0A0G2JUC7	Dctn2	Dynactin subunit 2 OS=Rattus norvegicus OX=10116 GN=Dctn2 PE=1 SV=1	37	13	163	13	1	420	46.2	5.5	436.12	13	0	26908711.9	27425332.24	27277582.25	24982068.97	34296558.58	19284496.27	60495491.82	6873597.734	47953481.96	38968460.18	33646930.65	55586311.88
A0A0G2JUD3	Ugt2b17	UDP-glucuronosyltransferase 2B17 OS=Rattus norvegicus OX=10116 GN=Ugt2b17 PE=3 SV=1	27	12	56	10	1	536	61.5	8.25	135.65	12	1	102472.6072	NA	1268754.088	857685.9089	892929.99	1815972.118	843573.9681	428976655.9	1256646.379	2648857.248	940471.5811	1336664.212
A0A0G2JUE4	Golga4	Golgin subfamily A member 4 OS=Rattus norvegicus OX=10116 GN=Golga4 PE=1 SV=1	6	12	30	12	1	2281	262.3	5.34	77.97	12	0	2142168.648	2485060.094	4061420.332	3071188.979	1072988.237	2403979.128	5919076.851	7683289.545	6357099.598	3365945.427	1993066.389	4502566.504
A0A0G2JUF2	Snx30	Sorting nexin family member 30 OS=Rattus norvegicus OX=10116 GN=Snx30 PE=1 SV=1	9	4	5	4	1	470	53.2	6.21	11.02	4	0	2595488.13	2028114.984	832288.1511	994176.211	2803262.287	919463.4649	1386016.583	83075.70133	3082829.117	794550.7691	939102.9625	3105830.132
A0A0G2JUF5	Sftpd	Pulmonary surfactant-associated protein D OS=Rattus norvegicus OX=10116 GN=Sftpd PE=1 SV=1	23	8	179	8	1	414	42	8.43	498.83	8	0	55681561.73	75273620.69	70100734.77	80233870.51	87738052.35	98276871.01	36286396.03	818075.5872	44678918.82	102747441	48483520.87	34299114.17
A0A0G2JUF9	Nckap1l	NCK-associated protein 1-like OS=Rattus norvegicus OX=10116 GN=Nckap1l PE=1 SV=1	11	11	55	10	1	1134	129	6.64	134.26	11	0	4240250.265	4508706.766	9156066.897	8332084.519	5899437.049	8539940.497	6252874.447	1899986.389	11298079.11	8704931.872	11993498.46	9308119.842
A0A0G2JUG4	Rgs6	Regulator of G-protein-signaling 6 OS=Rattus norvegicus OX=10116 GN=Rgs6 PE=1 SV=1	3	1	1	1	1	421	49.1	8.22	2.75	1	0	NA	NA	NA	NA	NA	NA	NA	NA	NA	NA	NA	NA
A0A0G2JUG7	Iqsec1	IQ motif and Sec7 domain 1 OS=Rattus norvegicus OX=10116 GN=Iqsec1 PE=1 SV=1	2	2	10	2	1	962	108	7.68	21.04	2	0	1096841.825	447233.4063	648638.9127	688280.3102	374203.6895	536903.8347	1034126.04	217525.6342	540230.2235	460396.7294	918524.8248	1307100.597
A0A0G2JUI5	Clasp1	Cytoplasmic linker-associated protein 1 OS=Rattus norvegicus OX=10116 GN=Clasp1 PE=1 SV=1	4	4	26	2	1	1551	170.8	9.19	59.42	4	2	1313777.982	1383615.387	1100041.544	1069581.23	1157063.334	1265345.096	1290342.88	326287.8378	1794234.878	2567875.806	1483964.064	2280997.36
A0A0G2JUJ9	Sec63	SEC63 homolog, protein translocation regulator OS=Rattus norvegicus OX=10116 GN=Sec63 PE=1 SV=1	28	17	131	17	1	760	87.7	5.41	299.19	17	0	25274203.56	28003199.75	56319662.18	54500696.92	33287918.7	34969755.56	22605741.01	60075701.99	18574488.21	23477219.6	33830917.49	32772291.33
A0A0G2JUM2	LOC361635	VPS35 endosomal protein sorting factor-like OS=Rattus norvegicus OX=10116 GN=Vps35l PE=1 SV=1	18	16	97	16	1	1006	113.9	7.91	220.89	16	0	24395718.39	17063253.99	17790023.52	15816500.87	29491802.37	15830790.74	11800241.39	9460139.017	19966587.71	18862135.01	32163460.25	30718951.56
A0A0G2JUM3	Rp2	RP2, ARL3 GTPase-activating protein OS=Rattus norvegicus OX=10116 GN=Rp2 PE=1 SV=1	8	3	36	3	1	409	44.7	5.8	83.2	3	0	8532752.287	10598290.5	5095551.916	7001293.557	10397911.25	6826608.068	9523069.786	2874216.277	15029911.28	5570326.521	9411185.459	9602328.04
A0A0G2JUM8	Coa6	Cytochrome c oxidase assembly factor 6 OS=Rattus norvegicus OX=10116 GN=Coa6 PE=1 SV=1	14	1	1	1	1	79	9.4	7.75	2.66	1	0	801764.3823	NA	1424249.836	1532340.191	412915.2079	753195.0785	NA	896681.9178	NA	NA	NA	NA
A0A0G2JUN8	Psmb7	Proteasome subunit beta OS=Rattus norvegicus OX=10116 GN=Psmb7 PE=1 SV=1	9	3	5	3	1	293	31.8	9.29	14.63	3	0	2450007.253	2763024.125	3235762.676	2697013.306	3901853.848	3225661.089	1710817.437	10415631.55	3464721.694	1402645.179	4170461.941	2760599.329
A0A0G2JUS5	Dolpp1	Dolichyl pyrophosphate phosphatase 1 (Predicted), isoform CRA_b OS=Rattus norvegicus OX=10116 GN=Dolpp1 PE=1 SV=1	3	1	2	1	1	238	27.1	9.44	0	1	0	45373.28145	69947.35938	38838.72009	36952.33455	52064.92674	35183.33829	NA	115595.9426	NA	118621.8225	100968.8061	79913.12556
A0A0G2JUT7	B3glct	Beta 3-glucosyltransferase OS=Rattus norvegicus OX=10116 GN=B3glct PE=1 SV=1	8	3	5	3	1	485	55.2	6.57	11.16	3	0	2747763.991	2251360.781	1619284.94	1669199.964	2458304.538	1733837.298	1396273.255	330043.1638	1583325.328	238940.5635	405405.9727	340893.877
A0A0G2JUU7	Tubgcp3	Gamma-tubulin complex component OS=Rattus norvegicus OX=10116 GN=Tubgcp3 PE=1 SV=1	1	1	2	1	1	902	103	8.21	4.06	1	0	408515.3061	285549.8125	513192.0411	267756.8151	337031.0764	403343.3371	424948.5446	118770.2786	394491.8971	NA	547614.4478	477951.4604
A0A0G2JUX2	Arap3	ArfGAP with RhoGAP domain, ankyrin repeat and PH domain 3 OS=Rattus norvegicus OX=10116 GN=Arap3 PE=1 SV=1	5	6	32	6	1	1536	169.6	6.92	70.13	6	0	3111626.791	2808102.969	2019699.532	2359466.976	3555156.234	2026023.776	1026427.734	8530848.903	1272562.696	395877.8043	862245.2325	3310535.329
A0A0G2JUX4	Usp47	Ubiquitin-specific peptidase 47 OS=Rattus norvegicus OX=10116 GN=Usp47 PE=1 SV=1	5	5	14	5	1	1375	157.2	5.12	33.14	5	0	345538.1985	517704.3438	494355.8335	201752.3271	425853.6465	352977.8451	NA	1033826.381	1582128.709	272224.801	NA	129561.0411
A0A0G2JUX5	Purb	Transcriptional activator protein Pur-beta OS=Rattus norvegicus OX=10116 GN=Purb PE=1 SV=1	28	6	97	6	1	317	33.5	5.43	232.25	6	0	20835030.56	18519044.03	19881916.08	17344124.46	21692329.51	27989251.28	39740359.02	25059197.71	38859362.2	14499998.57	23900704.43	31610431.46
A0A0G2JUY3	#N/A	Uncharacterized protein OS=Rattus norvegicus OX=10116 PE=4 SV=1	11	1	1	1	1	115	12.7	5.99	2.35	1	0	NA	NA	NA	NA	250407.2578	351238.794	207824.199	NA	791393.8736	1019615.801	NA	NA
A0A0G2JUZ0	Mtmr1	Myotubularin-related protein 1 OS=Rattus norvegicus OX=10116 GN=Mtmr1 PE=1 SV=1	4	2	3	2	1	672	75.5	7.15	4.19	2	0	1681268.394	747771.6875	886949.3203	808997.2835	705292.3625	868886.662	1022330.973	685098.1338	907278.8816	862693.2124	250754.1933	390410.102
A0A0G2JUZ5	Gldc	Glycine cleavage system P protein OS=Rattus norvegicus OX=10116 GN=Gldc PE=1 SV=1	13	8	8	8	1	943	105.1	6.84	22.42	8	0	2500000.965	2995798.391	1604304.825	1127776.061	2203378.888	2919571.391	3061676.277	11257797.26	3971443.281	3016019.599	2475931.977	1334388.082
A0A0G2JV05	Mroh1	Maestro heat-like repeat family member 1 OS=Rattus norvegicus OX=10116 GN=Mroh1 PE=1 SV=1	1	1	2	1	1	1640	181.8	6.38	5.48	1	0	86025.05997	128587.4531	55232.09293	77448.0318	226756.698	70340.70027	267185.4424	103605.0321	325058.2813	479740.7233	580094.2245	435028.9879
A0A0G2JV12	Col15a1	Collagen type XV alpha 1 chain OS=Rattus norvegicus OX=10116 GN=Col15a1 PE=1 SV=1	1	1	2	1	1	1345	138.2	5.01	0	1	0	208822.2193	151489.0625	374976.1105	394389.07	201637.6042	446781.6418	259397.9573	NA	349192.3325	408351.2121	NA	619786.9777
A0A0G2JV16	Dock11	Dedicator of cytokinesis 11 OS=Rattus norvegicus OX=10116 GN=Dock11 PE=1 SV=1	3	5	18	4	1	2086	239.1	7.75	31.92	5	0	244922.2059	301815.4766	NA	NA	587597.4482	145027.5762	133743.5613	NA	462926.8434	749964.4666	1346903.479	1501504.23
A0A0G2JV31	Xpnpep1	X-prolyl aminopeptidase (Aminopeptidase P) 1, soluble, isoform CRA_a OS=Rattus norvegicus OX=10116 GN=Xpnpep1 PE=1 SV=1	15	8	60	8	1	666	74.6	5.9	142.58	8	0	3909381.893	4939045.266	4143069.784	4004402.685	5449643.881	4399457.894	6578822.368	4044299.967	7730511.988	8206684.557	7476865.753	6135950.105
A0A0G2JV37	LOC100910040	Carboxylic ester hydrolase OS=Rattus norvegicus OX=10116 GN=Ces2c PE=1 SV=1	16	7	54	3	1	560	62.1	6.09	85.57	7	0	242094.023	NA	304403.2644	330753.4707	374630.0593	NA	77813.04749	6654289.689	NA	101360.6989	NA	368953.7941
A0A0G2JV42	#N/A	Uncharacterized protein OS=Rattus norvegicus OX=10116 PE=1 SV=1	17	1	1	1	1	115	12.6	7.24	2.78	1	0	180463.7027	197134.5469	NA	NA	NA	69167.01014	1116685.961	NA	333800.2592	246115.4809	NA	NA
A0A0G2JV51	Nat10	RNA cytidine acetyltransferase OS=Rattus norvegicus OX=10116 GN=Nat10 PE=1 SV=1	1	1	5	1	1	1024	115.3	8.34	12.82	1	0	NA	NA	NA	NA	NA	93003.40562	NA	NA	NA	267858.195	139995.4846	NA
A0A0G2JV54	Ptbp3	Polypyrimidine tract-binding protein 3 OS=Rattus norvegicus OX=10116 GN=Ptbp3 PE=1 SV=1	21	8	30	7	1	554	59.8	8.94	62.69	8	0	3205475.322	2923003.625	2779001.074	2759675.507	2489872.408	3714111.263	7494056.463	4034270.753	6919428.199	3008164.137	3988939.688	6074307.536
A0A0G2JV79	Slco2a1	Solute carrier organic anion transporter family member OS=Rattus norvegicus OX=10116 GN=Slco2a1 PE=1 SV=1	21	15	203	15	1	644	70.3	8.63	394.34	15	0	209324144.9	239188489.4	272567894.2	188357984.8	237280627	200256294.7	66514750.94	24540119.73	91063176.15	85292118.4	88977586.6	118722778.2
A0A0G2JV84	Gpt2	Glutamic--pyruvic transaminase 2 OS=Rattus norvegicus OX=10116 GN=Gpt2 PE=1 SV=1	5	2	2	2	1	544	60.3	8.37	4.54	2	0	6429121.86	3174321.5	3660069.407	4366260.63	5392007.402	4523602.533	12387819.27	4549459.763	14414427.06	3671096.71	20648736.56	19366546.87
A0A0G2JVB0	Slc2a3	Solute carrier family 2, facilitated glucose transporter member 3 OS=Rattus norvegicus OX=10116 GN=Slc2a3 PE=1 SV=1	9	5	21	5	1	495	53.9	4.82	45.31	5	0	3599961.192	5216926.844	10618683.89	6100495.457	5207739.468	22586949.67	1433903.531	231143.8139	3084096.789	4188681.613	2345262.098	5578857.926
A0A0G2JVB2	Scube2	Signal peptide, CUB domain and EGF-like domain-containing 2 OS=Rattus norvegicus OX=10116 GN=Scube2 PE=4 SV=1	4	3	6	3	1	1000	110.2	6.71	16.7	3	0	1288834.878	958143.375	1885174.4	1164552.396	661517.1128	995465.1661	417114.703	2986700.166	NA	NA	392456.4626	755850.7792
A0A0G2JVB6	Stx12	Syntaxin-12 OS=Rattus norvegicus OX=10116 GN=Stx12 PE=1 SV=1	35	8	138	8	1	285	32.5	5.78	352.91	8	0	60449477.21	46293353.25	60479115.44	50424113.16	60558465.27	47953323.59	50953644.44	13321624.15	30402392.34	24475323.22	37691802.92	54736123.16
A0A0G2JVC2	Scyl2	SCY1-like pseudokinase 2 OS=Rattus norvegicus OX=10116 GN=Scyl2 PE=1 SV=1	4	3	12	3	1	934	103.7	8.13	25.64	3	0	2947606.502	2420186.563	1832044.364	2872116.424	2708187.843	1616512.216	1580415.174	63912.00475	2134074.331	1345881.555	2106811.894	3361793.149
A0A0G2JVC8	Lss	Terpene cyclase/mutase family member OS=Rattus norvegicus OX=10116 GN=Lss PE=1 SV=1	13	7	29	7	1	733	83.2	6.67	69.16	7	0	3988606.383	6060644.938	8022672.05	5334856.576	3783114.564	6109627.847	3476565.645	6253315.023	2485194.21	5074773.835	3862164.881	6082116.67
A0A0G2JVD6	Kmt2d	5'-AMP-activated protein kinase subunit gamma-1 OS=Rattus norvegicus OX=10116 GN=Kmt2d PE=1 SV=1	1	6	38	6	1	5840	628.4	5.87	47.78	6	0	5718550.538	5254147.875	5840328.464	5666801.635	6969330.787	5472569.139	7464904.587	16315866.47	18436711.64	8362592.813	7119255.257	14739785.98
A0A0G2JVE6	Anpep	Aminopeptidase OS=Rattus norvegicus OX=10116 GN=Anpep PE=1 SV=1	33	28	364	2	1	965	109.4	5.47	1027.37	28	25	148371858.7	198919793.2	157096494.6	132823393.5	217815123.6	239134146.5	111837269.7	44132257.14	189036603.3	146830710.1	210511900.1	145927978.4
A0A0G2JVG4	Pecr	Peroxisomal trans-2-enoyl-CoA reductase OS=Rattus norvegicus OX=10116 GN=Pecr PE=1 SV=1	44	8	121	8	1	305	32.7	8.59	326.35	8	0	38405066.1	30973164.94	70119426.14	82664233.94	35106078.27	31738856.37	12428456.21	289453633.8	12145093.85	32060775.1	15648784.24	18556733.31
A0A0G2JVH4	Immt	MICOS complex subunit MIC60 OS=Rattus norvegicus OX=10116 GN=Immt PE=1 SV=1	44	27	465	27	1	776	86.2	5.85	1204.99	27	0	111264440.4	161887767.4	314907631.3	230015188.1	151654311.6	157723768.6	99093302.5	53363101.01	73545896.5	176718742.7	159192745.8	109059422.8
A0A0G2JVH9	Fam102b	Family with sequence similarity 102, member B OS=Rattus norvegicus OX=10116 GN=Fam102b PE=4 SV=1	5	1	1	1	1	352	38.4	6.96	0	1	0	293699.4417	307362	NA	290341.8933	607211.6058	941893.3907	2201419.814	NA	609053.3225	513177.8621	304294.805	269132.3974
A0A0G2JVI4	Fuk	Fucokinase OS=Rattus norvegicus OX=10116 GN=Fuk PE=1 SV=1	1	1	2	1	1	1090	119.5	6.7	5.72	1	0	NA	378364.8125	634370.1291	470454.8604	448481.2554	419443.2757	791183.543	441070.311	1293624.669	NA	NA	517508.4632
A0A0G2JVL5	RGD1305938	Similar to expressed sequence AW549877 (Predicted) OS=Rattus norvegicus OX=10116 GN=RGD1305938 PE=1 SV=1	6	1	1	1	1	251	28.9	4.96	2.39	1	0	27585.99758	84736.63281	NA	20588.99025	149125.4437	19362.85633	245794.3383	68813.55545	80329.76295	181277.3014	81755.03052	121810.1093
A0A0G2JVM2	Mia3	Uncharacterized protein OS=Rattus norvegicus OX=10116 PE=1 SV=1	25	30	164	30	1	1377	153.4	5.21	385.98	30	0	31432734.78	35088067.97	46417979.48	37353923.59	47048038.15	40129366.65	23343202.56	78056848.69	16410782.22	19584090.81	30120894.93	31049068.36
A0A0G2JVR0	Ptpra	Receptor-type tyrosine-protein phosphatase alpha OS=Rattus norvegicus OX=10116 GN=Ptpra PE=1 SV=1	10	6	41	6	1	797	90.3	6.83	111.07	6	0	3304309.815	2148512.656	2891494.834	2843494.778	2916529.994	4165398.383	3200774.868	1610809.137	4482127.773	2294300.102	3615174.106	4050728.31
A0A0G2JVR9	Fam65a	Rho family-interacting cell polarization regulator 1 OS=Rattus norvegicus OX=10116 GN=Ripor1 PE=1 SV=1	23	19	139	19	1	1231	133.2	6.02	366.71	19	0	29869558.8	29551284.58	27470080.93	24265131.25	28172350.71	19990377.97	24496578.93	791770.7665	17513275.98	8764465.733	9739726.919	19670333.51
A0A0G2JVT8	LOC500013	Uncharacterized protein OS=Rattus norvegicus OX=10116 PE=1 SV=1	9	11	57	11	1	1548	178.7	7.47	127.82	11	0	4608567.952	5179633.906	7552313.06	7424211.294	4106029.464	4872423.678	6607832.517	1479355.001	7430693.295	2891790.993	8509875.164	18623668.04
A0A0G2JVW0	Siglec10	Sialic acid-binding Ig-like lectin 10 OS=Rattus norvegicus OX=10116 GN=Siglec10 PE=4 SV=1	4	2	9	2	1	688	76.7	7.55	25.62	2	0	211754.4601	428522.2813	589934.7929	430881.4347	710653.9127	560364.0836	NA	NA	NA	417308.5969	838679.6359	211270.267
A0A0G2JVW3	Ankrd17	Ankyrin repeat domain 17 OS=Rattus norvegicus OX=10116 GN=Ankrd17 PE=1 SV=1	4	7	18	2	1	2524	267.1	6.55	46	7	0	119637.8272	93976.78125	75053.50324	65058.68885	147673.5298	63624.02803	1455517.093	552435.0405	271062.2224	403764.4316	1186341.317	484687.7508
A0A0G2JVW5	Huwe1	E3 ubiquitin-protein ligase HUWE1 OS=Rattus norvegicus OX=10116 GN=Huwe1 PE=1 SV=1	4	13	63	13	1	4062	447.4	5.4	159.08	13	0	2584365.804	2907336.375	2327700.783	2813748.472	4539497.437	2942021.014	3420588.577	2903593.596	4939737.688	3964208.64	4605744.71	4815711.559
A0A0G2JVY4	Tmem63a	Transmembrane protein 63a OS=Rattus norvegicus OX=10116 GN=Tmem63a PE=4 SV=1	10	6	24	6	1	810	92.5	7.83	59.78	6	0	4480819.982	3491712.266	4315631.817	2448855.4	3695845.094	3969099.296	934898.4027	154461.5622	5284133.969	3646378.747	4583446.935	8085562.608
A0A0G2JVZ6	Itgav	Integrin subunit alpha V OS=Rattus norvegicus OX=10116 GN=Itgav PE=1 SV=1	31	24	194	24	1	1052	115.7	5.74	471.53	24	0	32173774.89	35644268.63	30460887.98	24544943.28	30386654.74	46678784.38	31425341.29	6371650.414	51226861.39	40619715.55	42260259.38	46954069.15
A0A0G2JW01	Ablim1	Uncharacterized protein OS=Rattus norvegicus OX=10116 PE=1 SV=1	16	5	12	3	1	427	48.6	8.07	27.23	5	0	1454468.978	1757655.281	1287678.763	1922611.064	2108069.063	1810942.7	5177900.191	925358.8689	2905537.297	1732421.334	2823399.335	1956297.115
A0A0G2JW14	Spg21	Maspardin OS=Rattus norvegicus OX=10116 GN=Spg21 PE=1 SV=1	7	2	8	2	1	308	35	5.95	19.24	2	0	2399611.293	1735124.859	2964427.596	2632049.84	2437888.9	1310077.466	2643315.943	214919.2765	3193977.091	2815940.109	2361894.644	1654178.476
A0A0G2JW29	Man1a1	alpha-1,2-Mannosidase OS=Rattus norvegicus OX=10116 GN=Man1a1 PE=1 SV=1	7	4	9	4	1	746	82.1	6.34	19.97	4	0	2416800.402	2838499.695	3451204.792	2518699.425	3284369.878	3560224.984	1694729.121	7616898.096	424170.2766	3576675.507	2203053.918	3121960.138
A0A0G2JW34	Cisd3	CDGSH iron sulfur domain 3 OS=Rattus norvegicus OX=10116 GN=Cisd3 PE=1 SV=1	10	1	2	1	1	127	14.4	9.88	3.57	1	0	149763.4458	NA	118613.2191	150912.0297	275842.0035	NA	NA	807007.2432	NA	NA	NA	NA
A0A0G2JW38	Rpe	Ribulose-phosphate 3-epimerase OS=Rattus norvegicus OX=10116 GN=Rpe PE=1 SV=1	11	2	20	1	1	228	24.9	5.41	31.57	2	0	NA	134655.8906	NA	42653.99086	190399.2395	57901.5868	302825.0542	146539.9558	147504.4966	156888.3514	NA	101204.1301
A0A0G2JW41	#N/A	Uncharacterized protein OS=Rattus norvegicus OX=10116 PE=1 SV=1	26	2	7	1	1	118	13	7.08	21.42	2	0	NA	NA	NA	NA	NA	NA	1412195.931	NA	NA	NA	124116.428	NA
A0A0G2JW59	Flt3	Fms-related tyrosine kinase 3 OS=Rattus norvegicus OX=10116 GN=Flt3 PE=3 SV=1	2	2	18	1	1	1002	113.7	6.61	20.24	2	0	963627.591	1102782.25	1027226.526	631251.8088	1156063.756	1130407.419	NA	105863.4116	616750.743	496582.1513	602914.5259	468790.4178
A0A0G2JW60	Utrn	Utrophin OS=Rattus norvegicus OX=10116 GN=Utrn PE=1 SV=1	24	66	445	64	1	3424	391.8	5.33	1043.91	66	2	63090844.42	90188755.68	79847988.16	75340647.08	73895651.11	88794003.35	99114580.78	16199613.37	89988053.92	84536898.86	102084498.2	87943115.05
A0A0G2JW85	Rasa3	Ras GTPase-activating protein 3 OS=Rattus norvegicus OX=10116 GN=Rasa3 PE=1 SV=1	17	11	62	11	1	834	95.9	7.34	123.52	11	0	13138920.62	20208697.3	17607631.85	16506034.53	18374050.29	18206194.13	23301840.32	7074489.467	18895122.06	10883678.05	14338700.65	16360854.45
A0A0G2JW88	Map4	Microtubule-associated protein OS=Rattus norvegicus OX=10116 GN=Map4 PE=1 SV=1	17	27	299	4	1	2201	233.3	5.62	746.05	27	22	208034458.7	101737301.3	97959491.76	100048123.7	108902089.6	85053497.58	117830562.3	13574728.32	89126174.4	31096064.11	49776738.62	123009829.7
A0A0G2JW90	Pdha1l1	Pyruvate dehydrogenase E1 component subunit alpha OS=Rattus norvegicus OX=10116 GN=Pdha1 PE=1 SV=1	32	12	172	12	1	390	43.2	8.19	363.14	12	0	88899229.04	111713242.2	192084435.3	172910775.7	110386869.6	151823275.3	82446664.06	36754255.44	74239158.25	147435701.8	83150080.13	74759880.23
A0A0G2JWA2	Plcg2	1-phosphatidylinositol 4,5-bisphosphate phosphodiesterase gamma OS=Rattus norvegicus OX=10116 GN=Plcg2 PE=1 SV=1	3	3	3	3	1	1265	147.5	6.64	7.82	3	0	1269916.285	984404.0625	843848.7176	1598725.674	2301285.468	1357821.646	2519636.496	NA	1096944.599	2054971.789	2003345.144	3420851.04
A0A0G2JWA5	Slmap	Sarcolemmal membrane-associated protein OS=Rattus norvegicus OX=10116 GN=Slmap PE=1 SV=1	18	13	67	13	1	808	92.9	5.26	163.79	13	0	21737845.88	18754625.22	18881083.74	23451703.96	16834461.34	17525051.99	18016521.57	2849405.486	14173139.38	8104716.843	12738473.22	11148746.95
A0A0G2JWB6	Pxdn	Peroxidasin OS=Rattus norvegicus OX=10116 GN=Pxdn PE=4 SV=1	19	19	104	19	1	1475	165.3	6.99	252.01	19	0	9678208.19	9579593.317	9417486.606	7554875.093	12439621.1	14647719.03	13934624.98	1270331.408	12815629.86	23890260.99	21757810.82	17715667.04
A0A0G2JWC7	Fermt2	Fermitin family member 2 OS=Rattus norvegicus OX=10116 GN=Fermt2 PE=1 SV=1	36	25	319	25	1	695	79.6	6.92	755.85	25	0	84462533.83	85549086.25	63238953.99	58283388.89	93306407.51	79535773.49	68793550.66	22589296.51	121726022.9	54823813.18	88566828.76	102368485.5
A0A0G2JWD0	Prom1	Prominin 1 OS=Rattus norvegicus OX=10116 GN=Prom1 PE=4 SV=1	4	3	17	3	1	866	97.5	6.55	47.95	3	0	2026078.263	3002118.906	2640931.454	2325138.757	3151928.899	2659922.434	2539279.668	NA	2421881.23	2113523.559	2541231.587	3021355.729
A0A0G2JWD5	Jmjd8	JmjC domain-containing protein 8 OS=Rattus norvegicus OX=10116 GN=Jmjd8 PE=4 SV=1	4	1	3	1	1	291	32.7	7.71	8.29	1	0	247643.8556	484659.2188	786904.2126	538896.9535	770398.1609	510935.2868	843322.731	470219.8614	571136.0579	1063961.117	1259267.46	1676740.005
A0A0G2JWD6	Ap3b1	AP-3 complex subunit beta OS=Rattus norvegicus OX=10116 GN=Ap3b1 PE=1 SV=1	24	23	189	23	1	1096	121.4	6	408.83	23	0	69249214.86	34025454.65	46661820.28	34685614.55	50749165.9	26240162.17	41207631.8	21232457.18	40643234.42	31364636.92	58142254.41	56676888.24
A0A0G2JWE9	Erg	ETS transcription factor ERG OS=Rattus norvegicus OX=10116 GN=Erg PE=3 SV=1	4	1	1	1	1	479	53.9	7.44	1.65	1	0	NA	NA	NA	NA	NA	NA	NA	NA	NA	NA	NA	NA
A0A0G2JWG6	Golgb1	Golgin B1 OS=Rattus norvegicus OX=10116 GN=Golgb1 PE=1 SV=1	19	50	207	50	1	3228	368.9	5.06	511.93	50	0	37673809.47	34598071.21	38088556.99	34599015.24	67137684.34	44771812.67	40134462.94	32394411.51	19512800.94	39379995.07	46297626.98	43618051.7
A0A0G2JWH3	Ncapd2	Condensin complex subunit 1 OS=Rattus norvegicus OX=10116 GN=Ncapd2 PE=1 SV=1	1	1	1	1	1	1389	155.4	6.38	2.41	1	0	NA	NA	NA	NA	NA	NA	NA	NA	NA	NA	NA	NA
A0A0G2JWH5	Stt3a	STT3A, catalytic subunit of the oligosaccharyltransferase complex OS=Rattus norvegicus OX=10116 GN=Stt3a PE=1 SV=1	19	16	244	16	1	773	88.3	8.21	499.62	16	0	81222581.89	83522868.66	113297378.9	83351370.22	80314910.84	89683493.63	34578564.51	257006455	60589599.77	86421976.99	126747336	116486494
A0A0G2JWI8	Sec14l4	SEC14-like protein 3 OS=Rattus norvegicus OX=10116 GN=Sec14l4 PE=1 SV=1	52	19	408	15	1	400	46.1	5.78	883.92	19	4	267670354.8	346366446.7	279240045	246584192.9	412533682	219126734.8	213512478.8	25080958.81	162957185.3	137220001.5	253524446.6	166793902.6
A0A0G2JWJ0	Ppp1r12a	Protein phosphatase 1 regulatory subunit 12A OS=Rattus norvegicus OX=10116 GN=Ppp1r12a PE=1 SV=1	13	10	33	10	1	1032	115.2	5.47	67.08	10	0	10724999.06	13368160.06	7611932.364	6463559.245	10997464.8	10216098.49	7577747.141	1095941.967	8633652.933	8554601.785	4970500.744	5684675.588
A0A0G2JWJ3	Mid2	Midline 2 OS=Rattus norvegicus OX=10116 GN=Mid2 PE=4 SV=1	2	1	1	1	1	705	79.7	7.05	2.17	1	0	266891.9191	121797.0625	NA	NA	NA	NA	NA	NA	122034.6438	85969.86531	209812.7864	271187.5694
A0A0G2JWJ5	Atp7b	Copper-transporting ATPase 2 OS=Rattus norvegicus OX=10116 GN=Atp7b PE=1 SV=1	1	2	2	2	1	1513	162.5	6.83	4.71	2	0	NA	NA	NA	NA	NA	NA	NA	582102.3038	NA	NA	NA	NA
A0A0G2JWK7	Tagln	Transgelin OS=Rattus norvegicus OX=10116 GN=Tagln PE=1 SV=1	52	10	90	10	1	207	23.3	8.66	221.95	10	0	16475961.84	18863995.25	24634309.5	22939107.59	14227822.3	15915531.21	14847838.85	6634753.939	14842306.31	28873921.85	19841628.38	7511502.936
A0A0G2JWM2	Sirt2	NAD-dependent protein deacetylase OS=Rattus norvegicus OX=10116 GN=Sirt2 PE=1 SV=1	21	7	34	7	1	388	43.1	5.53	86.07	7	0	2527233.05	1961389.016	2838002.038	3539422.44	2794007.166	1533247.196	2312243.264	2057761.078	3882627.316	5367371.032	4055707.036	2614297.99
A0A0G2JWN8	Rapgef3	Rap guanine nucleotide exchange factor 3 OS=Rattus norvegicus OX=10116 GN=Rapgef3 PE=4 SV=1	1	1	1	1	1	926	104.5	8.13	2.74	1	0	572677.9256	515231.7188	5633717.19	3022119.703	NA	1719775.088	NA	1053820.211	1321558.275	9272298.058	NA	NA
A0A0G2JWQ4	Fam213a	Transmembrane protein 254 OS=Rattus norvegicus OX=10116 GN=Tmem254 PE=1 SV=1	9	1	14	1	1	129	14.9	9.94	28.67	1	0	3871744.799	4686318.25	4872209.858	4283524.185	7179526.772	3466822.887	519050.3548	932851.2765	1309127.242	2092055.823	3941130.379	880428.2767
A0A0G2JWQ7	C1galt1	Glycoprotein-N-acetylgalactosamine 3-beta-galactosyltransferase 1 OS=Rattus norvegicus OX=10116 GN=C1galt1 PE=1 SV=1	3	1	2	1	1	390	45.4	6.83	2.31	1	0	NA	NA	NA	NA	NA	NA	NA	678345.1641	NA	NA	631074.4379	377323.6972
A0A0G2JWR1	Trmt11	tRNA (guanine(10)-N2)-methyltransferase homolog OS=Rattus norvegicus OX=10116 GN=Trmt11 PE=4 SV=1	3	1	3	1	1	463	53.1	7.61	7.18	1	0	49619.83015	114945.1094	56341.19037	68340.6476	283215.7601	NA	NA	216581.6396	206291.9548	221509.7431	NA	NA
A0A0G2JWS1	Lrguk	Leucine-rich repeats and guanylate kinase domain-containing OS=Rattus norvegicus OX=10116 GN=Lrguk PE=4 SV=1	3	1	1	1	1	820	93.1	6.24	2.6	1	0	64864.38488	NA	90040.52167	NA	NA	119129.7201	NA	NA	NA	NA	NA	NA
A0A0G2JWS3	Piezo1	Piezo-type mechanosensitive ion channel component OS=Rattus norvegicus OX=10116 GN=Piezo1 PE=1 SV=1	2	5	19	5	1	2535	290.1	7.72	52.94	5	0	1690679.073	2538016.461	2424986.172	944178.0112	1348063.617	3280252.045	1704066.835	2276114.588	3897115.974	4819718.622	3629899.715	3247869.457
A0A0G2JWT6	Pex16	Peroxisomal membrane protein PEX16 OS=Rattus norvegicus OX=10116 GN=Pex16 PE=1 SV=1	14	4	22	4	1	336	38.6	9.74	50.33	4	0	6641983.543	7291410.031	8519345.721	3195593.299	6371945.794	5720456.178	4198459.445	10868501.33	2052088.167	2124687.755	3569607.073	4558950.937
A0A0G2JWX1	Psmd11	26S proteasome non-ATPase regulatory subunit 11 OS=Rattus norvegicus OX=10116 GN=Psmd11 PE=1 SV=1	32	13	116	13	1	500	55.9	7.91	271.28	13	0	10330564.43	15038993.53	11347815.64	15811996.69	25358410.31	14608828.82	25422967.05	39228162.34	39896561.17	21212767.5	24358362.47	29062502.71
A0A0G2JX01	Ttc7a	Tetratricopeptide repeat domain 7A OS=Rattus norvegicus OX=10116 GN=Ttc7a PE=1 SV=1	2	1	5	1	1	859	96.1	6.25	10.98	1	0	34942.27873	97992.32031	NA	NA	114259.6565	NA	165803.7809	202213.5281	94426.79904	229828.6365	283310.5697	172093.9887
A0A0G2JX07	Dapk2	Death-associated protein kinase 2 OS=Rattus norvegicus OX=10116 GN=Dapk2 PE=1 SV=1	7	2	2	2	1	365	42.3	7.06	5.54	2	0	433953.0752	398243.8281	929633.4943	343460.0243	153972.5379	197135.9741	266512.8785	226097.7825	210694.4136	146081.6798	187766.3065	128907.4913
A0A0G2JX25	Gmpr2	GMP reductase OS=Rattus norvegicus OX=10116 GN=Gmpr2 PE=1 SV=1	5	1	5	1	1	348	38	7.44	12.47	1	0	NA	NA	NA	276461.8624	788446.5376	NA	589797.1256	1001907.267	710922.4296	NA	NA	NA
A0A0G2JX39	Cd5	CD5 antigen, isoform CRA_b OS=Rattus norvegicus OX=10116 GN=Cd5 PE=1 SV=1	6	2	7	2	1	503	54.7	8.53	19.53	2	0	262137.4569	1364947.063	1436242.513	1208270.123	724473.4819	2270558.653	269622.0787	NA	1116738.093	620816.0314	565451.534	785471.6121
A0A0G2JX45	Ate1	Arginyl-tRNA--protein transferase 1 OS=Rattus norvegicus OX=10116 GN=Ate1 PE=1 SV=1	6	3	21	3	1	513	58.7	8.18	47.36	3	0	1461521.299	1158965.313	1574523.394	1148704.685	2050138.941	1348800.02	2473030.332	709066.8735	3404859.035	769302.0008	1668850.51	2571372.017
A0A0G2JX62	Srpk2	SRSF protein kinase 2 OS=Rattus norvegicus OX=10116 GN=Srpk2 PE=1 SV=1	4	2	3	1	1	712	80.5	4.96	8.66	2	0	360037.7812	87200.45313	316724.7109	235205.2735	195809.4215	194329.3266	412037.5123	184370.682	472387.3201	260022.9322	441299.6137	562160.1774
A0A0G2JX64	Tpm1	Tropomyosin 1, alpha, isoform CRA_i OS=Rattus norvegicus OX=10116 GN=Tpm1 PE=1 SV=1	47	19	322	1	1	284	32.7	4.75	828.44	19	9	55781415.01	71986995.98	40350574.3	55409068.63	82221547.49	64399583.48	58573030.92	33222402.86	57910548.21	69127115.56	45776091.96	41744456.58
A0A0G2JX67	Prepl	Prolyl endopeptidase-like OS=Rattus norvegicus OX=10116 GN=Prepl PE=1 SV=1	4	2	3	2	1	747	85.8	6.51	7.94	2	0	NA	NA	NA	NA	NA	NA	NA	NA	NA	NA	NA	NA
A0A0G2JX72	Mbnl1	Muscleblind-like-splicing regulator 1 OS=Rattus norvegicus OX=10116 GN=Mbnl1 PE=1 SV=1	5	2	10	2	1	436	47.2	8.62	10.33	2	0	1579385.93	2208249	2702230.663	935894.8728	1991818.553	1542075.56	10279477.29	3067044.501	8275882.336	4194496.16	3912344.508	6341723.233
A0A0G2JXC1	Lman1	Protein ERGIC-53 OS=Rattus norvegicus OX=10116 GN=Lman1 PE=1 SV=1	30	14	198	1	1	517	58.1	6.49	511.12	14	13	95937763.44	97224719.19	105845924.1	72470001.65	110243212.6	110307238.7	59221589.48	116245876.4	72870047.64	93383168.23	72200058.82	98635495.29
A0A0G2JXC2	Fmnl3	Formin-like 3 OS=Rattus norvegicus OX=10116 GN=Fmnl3 PE=1 SV=1	10	8	66	5	1	934	106.9	7.28	145.84	8	0	1258704.197	2518635.766	1882028.148	2863056.14	4294188.662	5912628.774	6038075.364	656772.7901	5598931.362	932368.9178	3745399.07	4159009.466
A0A0G2JXD6	Hydin	Hydin, axonemal central pair apparatus protein OS=Rattus norvegicus OX=10116 GN=Hydin PE=1 SV=1	0	1	1	1	1	5115	577.1	6.7	2.91	1	0	NA	NA	518661.639	429588.6551	NA	845762.1032	748594.6818	NA	946737.722	NA	NA	NA
A0A0G2JXD9	Dopey2	DOP1 leucine zipper-like protein B OS=Rattus norvegicus OX=10116 GN=Dop1b PE=1 SV=1	3	6	17	6	1	2298	257.6	6.01	32.29	6	0	6634205.751	6189394.516	6654555.33	5862974.532	6949217.194	5875107.137	6039381.739	6057854.69	4142649.366	6431925.239	6813743.732	10244380.09
A0A0G2JXE5	Ankle2	Ankyrin repeat and LEM domain-containing protein 2 OS=Rattus norvegicus OX=10116 GN=Ankle2 PE=1 SV=1	5	3	12	3	1	964	106.4	6.73	26.44	3	0	614624.1895	555585.9063	439593.8771	416341.7604	577281.7568	481626.1658	673657.2453	306030.9428	327531.2713	269258.7609	503666.3873	801278.345
A0A0G2JXG3	Tmem30a	Cell cycle control protein OS=Rattus norvegicus OX=10116 GN=Tmem30a PE=1 SV=1	19	7	105	7	1	364	41.1	7.97	287.95	7	0	29538348.49	62874884.5	35276912.68	57148928.5	35438745.08	39541172.91	15652998.94	17952172.86	28945313.48	27518577.45	28022216.01	27285546.62
A0A0G2JXG5	#N/A	Uncharacterized protein OS=Rattus norvegicus OX=10116 PE=1 SV=1	12	2	5	2	1	165	17.7	6.38	10.85	2	0	1756398.965	513157.9063	2078893.26	1077307.147	732251.2625	1315340.522	2815232.269	2116313.356	3191111.633	1767341.052	1137891.494	1959198.563
A0A0G2JXG7	Carmil1	Capping protein regulator and myosin 1 linker 1 OS=Rattus norvegicus OX=10116 GN=Carmil1 PE=1 SV=1	5	6	16	6	1	1421	157.4	7.99	32.14	6	0	13928987.87	18660100	12873657.17	8519849.891	21734599.86	7270433.555	4790679.1	1107322.147	9853089.174	12274392.33	13673443.27	16118472.76
A0A0G2JXH2	Ccdc51	Coiled-coil domain-containing protein 51 OS=Rattus norvegicus OX=10116 GN=Ccdc51 PE=1 SV=1	10	3	6	3	1	429	48	8.68	18.18	3	0	1730829.808	2207758.938	5351249.792	4283747.655	3138913.387	1990912.724	863614.8321	4714901.283	705606.9826	1615248.797	2926965.587	2008184.465
A0A0G2JXI9	Hist1h2bo	Histone H2B OS=Rattus norvegicus OX=10116 GN=Hist1h2bo PE=3 SV=1	41	6	159	6	1	138	15.5	10.24	312.96	6	0	29521178.8	173143560	32537595.45	121452188.3	165236717.7	239551426.4	54172313.99	36252096.38	89163887.08	467531075.1	306154438.1	23633205.93
A0A0G2JXN6	Lgals3	Galectin OS=Rattus norvegicus OX=10116 GN=Lgals3 PE=1 SV=1	19	5	109	5	1	265	27.6	8.87	279.36	5	0	9333303.882	11887106.99	7553047.246	9433983.674	11542655.54	7434067.234	21873763.07	4162409.227	54366188.23	9306376.167	25680037.44	30583161.38
A0A0G2JXN8	Osbpl8	Oxysterol-binding protein OS=Rattus norvegicus OX=10116 GN=Osbpl8 PE=1 SV=1	16	10	62	9	1	888	101.1	6.96	134.46	10	1	6152144.255	7312452.891	4617748.707	5852566.228	8782989.997	4456105.953	9704769.229	3243742.17	7239724.494	10974376.52	22486276.16	12112499.35
A0A0G2JXP1	Gyg1	Glycogenin-1 OS=Rattus norvegicus OX=10116 GN=Gyg1 PE=1 SV=1	7	2	6	2	1	361	40.6	5.87	14.74	2	0	NA	NA	793229.59	NA	NA	502200.1846	519338.2764	NA	1600931.242	NA	1796791.222	1576461.767
A0A0G2JXS8	Ssr1	Translocon-associated protein subunit alpha OS=Rattus norvegicus OX=10116 GN=Ssr1 PE=1 SV=1	11	3	91	3	1	319	35.5	4.4	174.33	3	0	12939437.1	14093135.67	16047230.22	11789205.31	14133765.25	13134356.3	31125830.44	70064987.78	17780279.73	18670113.96	42444436.07	29058789.11
A0A0G2JXT3	Fdps	Farnesyl pyrophosphate synthase OS=Rattus norvegicus OX=10116 GN=Fdps PE=1 SV=1	15	5	17	5	1	420	48.6	6.57	36.07	5	0	398888.498	235103.9609	NA	430073.5739	375832.786	339100.4724	801564.4688	1240730.501	881607.8109	700869.425	670862.103	864412.273
A0A0G2JXT6	Mtmr6	Myotubularin-related protein 6 OS=Rattus norvegicus OX=10116 GN=Mtmr6 PE=1 SV=1	13	6	22	6	1	655	75.5	7.93	49.57	6	0	1454183.749	1344528.281	953836.2843	1214609.114	1764512.667	924593.7546	4448496.493	2148189.86	4388032.423	932563.6201	2066339.988	3157237.626
A0A0G2JXT8	Flnb	Filamin B OS=Rattus norvegicus OX=10116 GN=Flnb PE=1 SV=1	36	69	631	61	1	2602	277.7	5.67	1478.05	69	1	77411943.42	87584272.09	79887980.23	89831402.83	90098684.35	74674086.26	111297963	76734889.35	95288030.86	120762479.2	107441539.7	87435545.2
A0A0G2JXT9	Arhgef17	Rho guanine nucleotide exchange factor (GEF) 17 OS=Rattus norvegicus OX=10116 GN=Arhgef17 PE=1 SV=1	1	2	8	2	1	2056	221.9	6.28	23.97	2	0	2590983.215	2583613.938	2450522.427	1914610.6	1869207.319	3264491.304	1207976.874	325003.6675	2051015.369	988466.5181	1068861.045	1977184.157
A0A0G2JXW4	Hnrnpc	Heterogeneous nuclear ribonucleoprotein C, isoform CRA_a OS=Rattus norvegicus OX=10116 GN=Hnrnpc PE=1 SV=1	26	10	35	10	1	313	34.4	5.05	63.81	10	0	27852327.65	8597116.406	3698209.293	7427142.681	8826427.822	10384123.84	16822003.55	6851767.915	9194047.637	7946465.42	11755465.5	7956680.391
A0A0G2JXY9	Epn2	Epsin-2 OS=Rattus norvegicus OX=10116 GN=Epn2 PE=1 SV=1	17	8	41	8	1	604	64.6	8.24	108.11	8	0	6174231.857	6310928.453	3191782.286	7588181.937	4070745.288	4896454.1	4601238.006	42521.97816	4079850.302	1888211.705	1934306.116	3530478.236
A0A0G2JXZ4	Hps1	HPS1, biogenesis of lysosomal organelles complex 3 subunit 1 OS=Rattus norvegicus OX=10116 GN=Hps1 PE=4 SV=1	2	1	1	1	1	706	80.3	6.09	2.43	1	0	NA	NA	NA	NA	NA	NA	NA	NA	NA	NA	NA	NA
A0A0G2JXZ9	Ptprj	Protein tyrosine phosphatase, receptor type, J OS=Rattus norvegicus OX=10116 GN=Ptprj PE=1 SV=1	8	9	38	9	1	1288	141.7	5.99	60.85	9	0	6618506.202	9432650.438	9717203.603	6504160.895	9338882.941	17720327.11	5880071.201	4174350.533	10405630.87	5049681.813	7719631.454	7456778.669
A0A0G2JY07	Mcm5	DNA helicase OS=Rattus norvegicus OX=10116 GN=Mcm5 PE=1 SV=1	2	1	1	1	1	734	82.4	7.88	2.44	1	0	262408.8272	NA	NA	210471.2148	NA	NA	NA	164221.7264	315503.0686	NA	NA	NA
A0A0G2JY08	Myo18a	Myosin XVIIIa OS=Rattus norvegicus OX=10116 GN=Myo18a PE=1 SV=1	16	27	164	27	1	2054	233.2	6.24	386.48	27	0	21033344.39	32197159.04	29599412.74	27381758.32	21784607.45	29313077.68	52728752.48	12874269.7	43639940.49	52532497.16	56351427.97	31391191.1
A0A0G2JY12	Pxn	Paxillin OS=Rattus norvegicus OX=10116 GN=Pxn PE=1 SV=1	34	14	129	14	1	586	64	6.39	307.4	14	0	11170202.64	13836253.27	88640654.44	45077977.97	24582240.94	31718566.38	34200767.32	7926587.597	46100190.35	16449891.7	14764120.79	22428313.34
A0A0G2JY22	Dip2b	Disco-interacting protein 2 homolog B OS=Rattus norvegicus OX=10116 GN=Dip2b PE=1 SV=1	14	18	81	16	1	1573	170.8	8.09	200.63	18	2	16219105.53	13340946.05	12919879.95	12760988.29	17935679.39	14442001.1	12219139.18	7921538.261	17696348.53	8707860.167	12759469.16	9729744.367
A0A0G2JY32	Lrba	LPS-responsive beige-like anchor protein (Fragment) OS=Rattus norvegicus OX=10116 GN=Lrba PE=4 SV=1	22	1	5	1	1	72	7.5	4.72	11.84	1	0	122043.9895	631271.6406	NA	275211.312	287263.7813	499565.4857	NA	288248.5782	442416.7157	677506.3454	389907.8105	411307.8049
A0A0G2JY43	Aldh3a2	Fatty aldehyde dehydrogenase OS=Rattus norvegicus OX=10116 GN=Aldh3a2 PE=1 SV=1	32	17	274	17	1	584	65.3	9.1	699.81	17	0	86846145.32	91661801.45	85486432.87	66928335.85	106167720.4	83697994.56	49541688.11	513152638.7	48847737.52	35107521.04	67541281.38	103066129.8
A0A0G2JY48	Ephb2	Eph receptor B2 OS=Rattus norvegicus OX=10116 GN=Ephb2 PE=1 SV=1	2	2	17	1	1	986	109.8	5.71	34.14	2	0	NA	228097.2813	379175.0607	295759.913	295993.5185	297640.7565	356416.8202	NA	505139.4311	NA	414250.8302	589599.8557
A0A0G2JY62	Lpin2	Lipin 2 OS=Rattus norvegicus OX=10116 GN=Lpin2 PE=1 SV=1	3	3	4	3	1	932	103.8	5.44	8.12	3	0	3364011.044	272239.6563	281028.9986	196268.5656	673454.862	125265.9979	1879451.253	779176.3262	1075501.644	387195.9916	925023.0393	1908616.784
A0A0G2JY73	Eif4g3	Eukaryotic translation initiation factor 4 gamma, 3 OS=Rattus norvegicus OX=10116 GN=Eif4g3 PE=1 SV=1	3	5	15	2	1	1614	179	5.85	25.15	5	0	389803.5529	NA	476045.8052	302104.327	562080.9311	NA	582684.7526	488540.9025	953008.4208	598245.4881	17254.32375	16928.90274
A0A0G2JY76	Osmr	Oncostatin-M-specific receptor subunit beta OS=Rattus norvegicus OX=10116 GN=Osmr PE=4 SV=1	5	2	2	2	1	962	108.6	6.7	2.55	2	0	34867.61004	NA	NA	NA	88685.1955	NA	NA	NA	202814.9989	229804.6304	406692.532	NA
A0A0G2JY98	#N/A	Uncharacterized protein OS=Rattus norvegicus OX=10116 PE=1 SV=1	11	1	6	1	1	140	15.4	8.87	14.65	1	0	317337.6292	285916.7188	235917.3546	269484.312	137811.614	208004.5157	1609784.901	NA	575516.1784	939128.1508	578595.76	175372.7007
A0A0G2JYA2	Arfip1	ADP-ribosylation factor interacting protein 1, isoform CRA_b OS=Rattus norvegicus OX=10116 GN=Arfip1 PE=1 SV=1	15	4	25	4	1	373	41.4	6.67	66.63	4	0	8906735.6	6622079.125	4800647.09	5073315.019	7054973.433	5087561.668	5450540.556	216473.1446	4677033.291	3553188.801	3730319.849	4725291.011
A0A0G2JYA4	LOC100362453	Serine/threonine-protein phosphatase OS=Rattus norvegicus OX=10116 GN=LOC100362453 PE=3 SV=1	46	9	100	1	1	309	35.5	5.43	262.56	9	0	1100637.417	1684884.125	928701.1126	1012348.133	2506187.083	1158391.301	1853091.055	2145929.949	2755153.943	2105939.32	1837167.979	2478715.349
A0A0G2JYA7	Tarbp1	TAR RNA binding protein 1 OS=Rattus norvegicus OX=10116 GN=Tarbp1 PE=1 SV=1	1	1	4	1	1	1575	174.8	6.9	11.5	1	0	NA	NA	NA	133251.0887	NA	89060.65854	NA	NA	NA	258034.1131	NA	173297.0313
A0A0G2JYB1	Capzb	F-actin-capping protein subunit beta OS=Rattus norvegicus OX=10116 GN=Capzb PE=1 SV=1	43	13	206	13	1	296	33.4	5.49	515.31	13	0	63011421.24	71611890.06	85836296.27	71950157.94	57453841.11	66137210.15	51103656.65	17722233.91	76414753.1	81963855.7	57097233.62	69106297.07
A0A0G2JYC0	Sult2a1	Sulfotransferase OS=Rattus norvegicus OX=10116 GN=Sult2a1 PE=1 SV=1	28	8	13	3	1	284	33.1	8.4	37.81	8	4	137007.0801	NA	NA	129663.0332	312731.9697	NA	550982.739	87716975.15	140839.5461	386794.4009	NA	NA
A0A0G2JYG5	Myo9b	Unconventional myosin-IXb OS=Rattus norvegicus OX=10116 GN=Myo9b PE=1 SV=1	3	5	19	5	1	2016	229.1	8.21	48.77	5	0	4235827.199	5203584.359	6110407.272	1774350.992	4910526.435	3367728.765	3917545.562	3031819.6	1093608.882	440281.7307	4598191.257	2559890.299
A0A0G2JYH7	Sh2d3c	SH2 domain containing 3C (Predicted) OS=Rattus norvegicus OX=10116 GN=Sh2d3c PE=1 SV=1	2	1	3	1	1	853	93.9	7.96	6.74	1	0	NA	94954.20313	NA	NA	133543.9584	50801.79821	NA	NA	262818.9736	204829.8105	NA	428351.5957
A0A0G2JYI0	Lrba	LPS-responsive beige-like anchor protein OS=Rattus norvegicus OX=10116 GN=Lrba PE=1 SV=1	10	21	135	21	1	2783	309.3	5.74	353.34	21	0	4056865.945	5990009.223	7222655.357	5240318.807	9638611.57	8598860.407	16108406.49	9210155.733	23528563.47	13849611	22129281.84	14892857.13
A0A0G2JYI7	Ubap2	Ubiquitin-associated protein 2 OS=Rattus norvegicus OX=10116 GN=Ubap2 PE=1 SV=1	1	1	1	1	1	1135	118.5	7.47	3.13	1	0	NA	NA	NA	NA	NA	NA	NA	NA	NA	NA	NA	NA
A0A0G2JYJ1	Grb10	Growth factor receptor-bound protein 10 OS=Rattus norvegicus OX=10116 GN=Grb10 PE=4 SV=1	2	1	17	1	1	636	72.2	9.33	49.3	1	0	1980973.647	1403844.625	896446.0524	1088484.906	1105971.632	1263086.289	1163468.493	NA	1479993.272	NA	1735713.61	1306664.415
A0A0G2JYK2	Rab11fip1	Rab11 family-interacting protein 1 OS=Rattus norvegicus OX=10116 GN=Rab11fip1 PE=1 SV=1	1	1	3	1	1	1189	127.8	6.39	5.85	1	0	77131.38869	252399.6719	38138.72387	NA	23669.18604	52110.3034	1027681.127	57859.65093	157333.892	327135.3494	303931.5011	385663.4275
A0A0G2JYN4	Ergic2	ERGIC and golgi 2 OS=Rattus norvegicus OX=10116 GN=Ergic2 PE=1 SV=1	3	1	8	1	1	377	42.5	6.83	24.54	1	0	576569.2615	930684.75	1215409.243	1339670.002	1808469.958	1322911.329	1445202.278	1346090.74	1218453.1	1150739.577	2379019.563	1859635.388
A0A0G2JYR1	Exoc6b	Exocyst complex component OS=Rattus norvegicus OX=10116 GN=Exoc6b PE=1 SV=1	14	9	39	8	1	810	94.1	6.39	89.05	9	1	7624855.911	7910709.547	9208529.157	8654333.774	7421012.999	8439551.993	8725455.434	2417736.514	5961610.203	4707839.672	7218232.343	8076050.49
A0A0G2JYT1	Erc1	ELKS/Rab6-interacting/CAST family member 1 OS=Rattus norvegicus OX=10116 GN=Erc1 PE=1 SV=1	12	11	27	11	1	1120	128.2	5.91	60.66	11	0	2835711.507	2461680.219	3277364.733	3027050.092	2214550.266	2773844.545	5696425.54	4346287.445	4485522.66	7982476.462	7013237.949	9946484.838
A0A0G2JYU6	Fmnl1	Formin-like 1 OS=Rattus norvegicus OX=10116 GN=Fmnl1 PE=1 SV=1	8	7	20	6	1	1101	122.7	5.77	55.17	7	0	2073956.954	2759133.742	2535752.871	239708.4022	1061043.904	3103611.381	5028668.346	NA	3302688.149	1680597.214	2811828.765	3584509.488
A0A0G2JZ34	Palmd	Palmdelphin OS=Rattus norvegicus OX=10116 GN=Palmd PE=4 SV=1	7	2	3	2	1	553	62.1	6.29	9.68	2	0	246437.3417	400477.2344	NA	65579.54412	482251.5988	109743.3575	490624.1518	161486.5916	NA	NA	175545.3851	779619.9172
A0A0G2JZ38	Fhod1	Formin homology 2 domain-containing 1 OS=Rattus norvegicus OX=10116 GN=Fhod1 PE=1 SV=1	28	24	186	24	1	1158	126.4	6.1	412.29	24	0	23129101.32	25906219.43	23832466.59	30106441.75	20991775.57	24872724.96	42706843.27	9264609.848	51776055.49	38305984.98	37418322.7	55570142.8
A0A0G2JZ40	Reck	RCG54895, isoform CRA_a OS=Rattus norvegicus OX=10116 GN=Reck PE=4 SV=1	22	17	86	17	1	972	105.9	6.84	199.77	17	0	27416572.82	29495374.62	27199514.43	22268152.74	25963775.34	36958885.18	13179692.31	7320985.882	15207326.68	8613145.506	10532952.79	21777222.99
A0A0G2JZ48	Tmf1	RCG56136, isoform CRA_a OS=Rattus norvegicus OX=10116 GN=Tmf1 PE=1 SV=1	6	5	5	5	1	1093	121.8	4.86	11.37	5	0	401355.6552	482549.2344	1524269.371	1759135.416	1125954.232	531543.066	1434390.543	1494174.295	127193.7992	1485542.094	2121227.093	1057079.433
A0A0G2JZ52	Hnrnpu	Heterogeneous nuclear ribonucleoprotein U OS=Rattus norvegicus OX=10116 GN=Hnrnpu PE=1 SV=1	14	11	132	11	1	803	87.9	6.09	285.51	11	0	100669120.7	44461386	21133362.09	27823665.97	33980530.39	47174592.11	33605051.78	26616500.84	40041045.28	30885610.61	45807153.14	36715941.45
A0A0G2JZ53	Birc6	Baculoviral IAP repeat-containing 6 OS=Rattus norvegicus OX=10116 GN=Birc6 PE=1 SV=1	5	18	73	18	1	3993	434	6.19	127.52	18	0	628024.3228	2247612.865	1486845.211	2376481.648	2695107.032	2778072.219	6834535.949	3082904.303	14915297.52	5929473.476	5701855.557	3592103.238
A0A0G2JZ69	Sptan1	Spectrin alpha chain, non-erythrocytic 1 OS=Rattus norvegicus OX=10116 GN=Sptan1 PE=1 SV=1	61	147	2938	2	1	2489	286.5	5.39	8182.46	147	0	8615692.849	8236526.281	6482032.966	5601621.428	9505833.321	5041095.352	3875715.824	NA	5222785.627	4474994.49	8662543.818	9040474.251
A0A0G2JZ73	Serpina1	Alpha-1-antiproteinase OS=Rattus norvegicus OX=10116 GN=Serpina1 PE=1 SV=1	40	15	211	15	1	415	46.6	6.34	538.43	15	0	92405353.15	67503222.42	64170202.2	68920513.1	81869777.35	65361914.36	140391642.6	133861773.8	202117119.9	324796783.4	253518327.3	101156253.4
A0A0G2JZ75	Plvap	Plasmalemma vesicle-associated protein OS=Rattus norvegicus OX=10116 GN=Plvap PE=4 SV=1	39	17	240	17	1	438	50.1	8.63	645.2	17	0	229084386.9	315518553.1	241719814.8	193049043.5	263494920.3	264000627.8	65195849.23	1014426.726	30283551.43	35281941.25	57834290.18	99184657.33
A0A0G2JZ84	Epg5	Ectopic P-granules autophagy protein 5 homolog OS=Rattus norvegicus OX=10116 GN=Epg5 PE=1 SV=1	0	1	3	1	1	2575	291.2	6.23	7.43	1	0	NA	251426.5781	NA	NA	NA	NA	386237.6634	NA	357028.8582	267648.2163	419774.0571	557481.4126
A0A0G2JZ88	RGD1306556	Similar to hypothetical protein A530094D01 OS=Rattus norvegicus OX=10116 GN=RGD1306556 PE=1 SV=1	1	1	2	1	1	1770	192.3	9.01	5.86	1	0	NA	45476.29688	447849.3102	73762.06674	95553.54713	78394.66118	NA	16157.7062	NA	NA	NA	NA
A0A0G2JZ94	Ttc13	Tetratricopeptide repeat domain 13 OS=Rattus norvegicus OX=10116 GN=Ttc13 PE=1 SV=1	2	1	2	1	1	845	95.3	7.02	5.22	1	0	NA	NA	NA	NA	NA	NA	NA	NA	NA	NA	NA	NA
A0A0G2JZA2	Grpel1	GrpE protein homolog OS=Rattus norvegicus OX=10116 GN=Grpel1 PE=1 SV=1	17	4	23	4	1	230	25.8	8.15	53.05	4	0	5593186.701	8397063.344	14935118.34	11706492.5	10865488.36	7595930.167	6548567.686	6841299.443	237515.7164	7030047.909	5241318.831	3455331.757
A0A0G2JZA7	Tmem2	Cell migration-inducing hyaluronidase 2 OS=Rattus norvegicus OX=10116 GN=Cemip2 PE=1 SV=1	14	14	109	14	1	1383	153.9	7.8	284.74	14	0	8522873.573	13113954.06	10750970.59	8518908.645	11251142.15	10958751.36	6378141.128	7210651.849	9757616.729	6335942.954	5370689.806	8098261.569
A0A0G2JZB8	Gpm6b	Neuronal membrane glycoprotein M6-b OS=Rattus norvegicus OX=10116 GN=Gpm6b PE=4 SV=1	4	1	16	1	1	291	31.5	5.95	43.78	1	0	1094849.816	1621765	905616.0356	927399.3331	1875348.458	752587.8123	1209454.792	NA	2608787.644	2037887.961	3274210.594	2206074.079
A0A0G2JZC3	Mrps36	Mitochondrial ribosomal protein S36 OS=Rattus norvegicus OX=10116 GN=Mrps36 PE=1 SV=1	14	1	7	1	1	112	12.4	10.17	20.62	1	0	3225443.957	2135143.5	7911124.259	9340758.473	2033505.668	NA	2653861.72	NA	277538.4746	NA	NA	1065547.238
A0A0G2JZC6	Arhgef11	Rho guanine nucleotide exchange factor 11 OS=Rattus norvegicus OX=10116 GN=Arhgef11 PE=1 SV=1	1	1	2	1	1	1576	174.1	5.83	0	1	0	NA	NA	15661.41653	NA	110772.5591	NA	195086.1752	49378.77182	77889.90074	174127.1451	NA	120550.492
A0A0G2JZD1	Ppp2r5c	Serine/threonine-protein phosphatase 2A 56 kDa regulatory subunit OS=Rattus norvegicus OX=10116 GN=Ppp2r5c PE=1 SV=1	8	4	26	2	1	550	63.7	8.57	60.95	4	2	4676928.085	5293567.406	4732513.32	4704073.823	6747920.939	4069507.907	4683965.05	2327487.54	7567276.326	5143275.286	3897586.828	4645799.479
A0A0G2JZE7	Arhgef40	Rho guanine nucleotide exchange factor 40 OS=Rattus norvegicus OX=10116 GN=Arhgef40 PE=1 SV=1	1	1	1	1	1	1516	165.2	5.47	1.94	1	0	48103.84721	66097.79688	33602.4084	32391.17847	67839.28461	18694.05034	173038.6641	50835.05582	75469.74798	NA	113269.0201	219733.5661
A0A0G2JZG7	Sars	Serine--tRNA ligase, cytoplasmic OS=Rattus norvegicus OX=10116 GN=Sars PE=1 SV=1	24	10	41	10	1	536	61.3	6.86	100.61	10	0	7124580.604	8656641.844	5204859.525	5918235.755	12726426.82	7098023.323	11906787.88	17678894.6	18365982.32	7285529.731	10688012.42	11409392.58
A0A0G2JZH0	Cab39	Calcium-binding protein 39 OS=Rattus norvegicus OX=10116 GN=Cab39 PE=1 SV=1	34	12	93	8	1	341	39.8	6.89	150	12	4	32911371.51	40169733.63	28503868.47	31032148.36	37341700.31	25429280.84	14886200.94	4391070.06	18044466.38	17943260.59	21496642.59	24188397.3
A0A0G2JZH4	Slc35a1	Solute carrier family 35 member A1 OS=Rattus norvegicus OX=10116 GN=Slc35a1 PE=1 SV=1	7	2	8	2	1	336	36.4	8.95	22.65	2	0	2028704.695	2534619.719	5933902.668	2593522.335	1747576.128	2538970.978	952691.9616	5151458.654	5034818.192	8586405.01	2075980.637	2232396.949
A0A0G2JZH8	Pdhx	Dihydrolipoamide acetyltransferase component of pyruvate dehydrogenase complex OS=Rattus norvegicus OX=10116 GN=Pdhx PE=1 SV=1	12	5	55	5	1	502	54.1	8.75	146.27	5	0	6436197.782	8267386.422	23230362.4	15875033.54	10529889.76	8323424.644	6691268.911	2993932.507	2052346.154	6763053.18	5341022.196	4642692.109
A0A0G2JZI2	Eprs	Glutamyl-prolyl-tRNA synthetase OS=Rattus norvegicus OX=10116 GN=Eprs PE=1 SV=1	40	49	371	48	1	1512	169.8	7.44	961.97	49	1	99552021.02	93205275.77	108675211.1	97135832.83	114823861.2	100650410	120242314.7	208024276.7	212199428.7	86603653.93	101661088.1	96894649.39
A0A0G2JZJ5	Ptdss1	Phosphatidylserine synthase 1 OS=Rattus norvegicus OX=10116 GN=Ptdss1 PE=1 SV=1	7	3	17	3	1	502	58.8	7.91	33.09	3	0	2595890.132	3278151.125	2673583.579	2646194.66	4115564.623	2228240.66	1329025.708	2485821.132	4553110.788	3371200.083	6364636.459	5244053.226
A0A0G2JZL6	Ift122	Intraflagellar transport 122 OS=Rattus norvegicus OX=10116 GN=Ift122 PE=4 SV=1	4	3	6	3	1	1241	141.6	6.34	14.48	3	0	4982112.271	8282240.516	3824968.268	4853848.008	4382559.873	9920108.867	3302848.2	1217509.604	6990194.965	5458192.147	4928168.364	4726546.535
A0A0G2JZM8	Clasp2	CLIP-associating protein 2 OS=Rattus norvegicus OX=10116 GN=Clasp2 PE=1 SV=1	3	3	23	1	1	1505	164.6	8.03	51.27	3	0	NA	NA	NA	NA	NA	NA	NA	NA	NA	NA	NA	NA
A0A0G2JZP7	Spg11	SPG11, spatacsin vesicle-trafficking-associated OS=Rattus norvegicus OX=10116 GN=Spg11 PE=4 SV=1	0	1	1	1	1	2465	277.7	5.96	0	1	0	NA	231539.2813	783791.9933	860352.5276	105765.7109	480583.6193	NA	116646.0707	149517.6283	181700.1048	NA	NA
A0A0G2JZQ1	Ddx19b	DEAD-box helicase 19A OS=Rattus norvegicus OX=10116 GN=Ddx19b PE=1 SV=1	17	6	20	1	1	492	55.3	8.18	50.47	6	5	1748523.029	1597280.008	1566355.614	2018309.59	2793229.478	1295025.831	4933272.75	2662363.991	6613636.904	2242658.69	4293188.72	5684020.218
A0A0G2JZR1	Osbpl6	Oxysterol-binding protein OS=Rattus norvegicus OX=10116 GN=Osbpl6 PE=1 SV=1	21	16	87	15	1	959	108.9	7.27	200.38	16	1	9987058.04	9910728.301	6621864.563	7097421.349	13708338.51	6899717.097	18528805.26	3960987.15	7284900.395	4645450.915	5335363.843	14234357.84
A0A0G2JZS3	Tm6sf1	Transmembrane 6 superfamily member 1 OS=Rattus norvegicus OX=10116 GN=Tm6sf1 PE=4 SV=1	3	1	1	1	1	370	41.6	7.64	2.89	1	0	NA	451134.9375	NA	NA	NA	NA	NA	NA	NA	NA	NA	NA
A0A0G2JZS9	#N/A	Uncharacterized protein OS=Rattus norvegicus OX=10116 PE=1 SV=1	38	3	19	3	1	97	10.8	4.97	47.5	3	0	1800274.851	4016816.313	2753400.632	2909893.576	797913.6992	2852047.952	65362368.53	2153305.296	3510378.594	5056966.038	2380283.661	3731504.729
A0A0G2JZT0	P2rx7	P2X purinoceptor 7 OS=Rattus norvegicus OX=10116 GN=P2rx7 PE=1 SV=1	9	4	34	4	1	616	70.7	8.28	74.06	4	0	3748721.315	5650971.75	2972962.536	3623297.518	5710347.633	4642946.666	6821381.825	2416067.818	7992440.005	6727257.389	4683912.728	11142117.6
A0A0G2JZT3	Slc11a1	Natural resistance-associated macrophage protein 1 OS=Rattus norvegicus OX=10116 GN=Slc11a1 PE=1 SV=1	5	2	5	2	1	548	60.3	7.8	12.58	2	0	1978464.478	1943965.594	2477709.984	2255339.954	1906248.535	1835873.464	2605708.514	1980694.816	2613651.133	2218637.827	1698296.981	1791503.996
A0A0G2JZV7	#N/A	Uncharacterized protein OS=Rattus norvegicus OX=10116 PE=1 SV=1	25	2	14	2	1	111	12.1	9.51	36.38	2	0	1467721.191	2177125.586	1158928.56	1459606.531	644463.8012	2996814.621	9838113.742	NA	1171227.133	707113.0426	6035829.62	322223.2926
A0A0G2JZV8	Fmr1	Synaptic functional regulator FMR1 OS=Rattus norvegicus OX=10116 GN=Fmr1 PE=1 SV=1	14	7	38	5	1	614	68.9	7.42	72.57	7	1	5446113.491	2189672.602	1180640.423	2261751.344	2758833.665	2073651.304	3380747.729	1505203.611	3102525.756	1238322.16	3435716.706	5817072.893
A0A0G2JZY3	Reps1	RALBP1-associated Eps domain-containing 1 OS=Rattus norvegicus OX=10116 GN=Reps1 PE=1 SV=1	3	2	8	1	1	744	80.5	5.88	18.3	2	0	144788.1495	168337.9063	NA	229598.5876	221559.6337	NA	538494.4377	NA	325176.0862	NA	124998.6824	179331.6355
A0A0G2JZZ0	Adgrf5	Adhesion G protein-coupled receptor F5 OS=Rattus norvegicus OX=10116 GN=Adgrf5 PE=1 SV=1	14	14	73	14	1	1384	153.1	6.92	180.9	14	0	35139868.72	40324817.53	24287849.56	26243128.26	37239040.15	34648805.1	12878522.3	890166.4226	16470940.66	12800451.14	9256903.351	12993443.93
A0A0G2JZZ3	Ctif	Cap-binding complex-dependent translation initiation factor OS=Rattus norvegicus OX=10116 GN=Ctif PE=1 SV=1	6	2	7	2	1	598	67.3	6.61	21.36	2	0	335195.851	201572.875	NA	293158.2267	300096.0315	178513.4114	594404.2505	421548.0726	435064.9625	374828.5945	456821.653	654193.4287
A0A0G2JZZ4	Selenom	Selenoprotein M OS=Rattus norvegicus OX=10116 GN=Selenom PE=1 SV=1	10	1	1	1	1	144	16.2	7.34	2.2	1	0	153821.7215	207872.4063	191034.2148	140762.6164	NA	161509.5245	259302.7039	NA	125220.7784	130931.4393	NA	NA
A0A0G2K012	Ubxn6	UBX domain protein 6 OS=Rattus norvegicus OX=10116 GN=Ubxn6 PE=1 SV=1	2	1	9	1	1	524	58.3	9.42	24.57	1	0	111426.1543	212994.6875	41499.03571	NA	407853.8343	92828.91422	456848.3308	NA	223153.8788	289716.5398	401367.0005	415848.4576
A0A0G2K014	Lcp1	Lymphocyte cytosolic protein 1 OS=Rattus norvegicus OX=10116 GN=Lcp1 PE=1 SV=1	59	32	392	29	1	645	71.9	5.34	869.15	32	3	65026978.73	100240911.4	114604620.9	92742693.27	77396634.11	114660661.1	108859310.8	22506980.36	157999895.8	289989813.7	176208144.4	88801812.73
A0A0G2K022	Rcn3	Reticulocalbin-3 OS=Rattus norvegicus OX=10116 GN=Rcn3 PE=1 SV=1	33	11	120	11	1	337	38.9	4.86	269.75	11	0	13256397.54	16035794.66	23378299.91	16373503	15844051.55	15432104.67	36809808.84	1925098.389	35234878.91	43627341.68	43417402.13	50298980.3
A0A0G2K038	Rexo2	Oligoribonuclease, mitochondrial OS=Rattus norvegicus OX=10116 GN=Rexo2 PE=1 SV=1	6	1	4	1	1	254	28.7	6.95	9.1	1	0	132365.8778	289627.4063	349644.3148	291808.6691	275087.1504	196644.8863	NA	NA	206118.2849	869048.1658	240096.5818	156488.0881
A0A0G2K042	Shank3	SH3 and multiple ankyrin repeat domains protein 3 OS=Rattus norvegicus OX=10116 GN=Shank3 PE=1 SV=1	17	22	135	1	1	1741	186.2	8.56	362.99	22	20	55294816.55	55346210.22	38348379.62	45458998.23	66624854.87	44365179.4	19638051.3	571933.2286	12018822.09	5944400.775	12480505.16	24189059.11
A0A0G2K047	Acss3	Acyl-CoA synthetase short-chain family member 3 OS=Rattus norvegicus OX=10116 GN=Acss3 PE=1 SV=1	11	6	13	6	1	683	74.6	8.63	33.31	6	0	1333543.391	2238220.375	3049818.107	3859707.304	2700234.058	1823187.948	152345.7006	5560556.716	133064.1191	1255102.691	911556.4042	460205.9636
A0A0G2K051	Eea1	Early endosome antigen 1 OS=Rattus norvegicus OX=10116 GN=Eea1 PE=1 SV=1	32	39	355	39	1	1449	165.3	5.72	998.44	39	0	58878290.68	58316626.41	76560811.55	85508811.59	74908322.52	78869002.32	117237483	84209256.43	191905579.6	78053971.61	60109205.61	96687211.74
A0A0G2K062	Mcemp1	Mast cell-expressed membrane protein 1 OS=Rattus norvegicus OX=10116 GN=Mcemp1 PE=4 SV=1	4	1	2	1	1	213	24	9.92	1.67	1	0	890449.6698	881338.5	1079128.458	736341.6674	1151386.57	905897.6151	411764.2644	NA	NA	1223980.295	943357.1472	NA
A0A0G2K089	Dennd4c	DENN domain-containing 4C OS=Rattus norvegicus OX=10116 GN=Dennd4c PE=1 SV=1	5	7	10	7	1	1901	211	6.37	23.54	7	0	3924289.551	2229719.063	2407353.355	1659561.249	2890247.763	1520882.884	5119365.886	363382.7961	3390156.873	2501310.937	1294382.859	1933557.122
A0A0G2K098	Mcc	MCC, WNT-signaling pathway regulator OS=Rattus norvegicus OX=10116 GN=Mcc PE=1 SV=1	6	4	14	4	1	811	91.1	5.55	35.5	4	0	346934.1849	1608419.625	2336760.331	2495585.358	2468944.553	2394592.223	2456467.895	771757.036	554887.7461	611856.8135	466494.0613	1944841.226
A0A0G2K0B0	Cdv3	Protein CDV3 homolog OS=Rattus norvegicus OX=10116 GN=Cdv3 PE=1 SV=1	11	1	1	1	1	281	29.6	5.68	2.99	1	0	NA	NA	NA	NA	NA	NA	597014.1005	NA	NA	NA	NA	NA
A0A0G2K0D3	Lmod1	Leiomodin-1 OS=Rattus norvegicus OX=10116 GN=Lmod1 PE=1 SV=1	5	2	7	2	1	595	66.2	9.35	11.3	2	0	454982.9696	530595.0313	369698.5455	223962.5441	103637.4464	222574.7993	556858.3489	NA	118401.5214	258424.2684	372072.5908	182615.7987
A0A0G2K0F3	Epb41l1	Band 4.1-like protein 1-like OS=Rattus norvegicus OX=10116 GN=Epb41l1 PE=1 SV=1	4	5	32	3	1	1551	171	5.34	77.91	5	0	3247502.713	2327281.75	3452527.637	2856697.804	3710540.018	3100343.274	2843704.134	3044849.097	2520430.731	375443.0622	1262246.217	2465710.653
A0A0G2K0G1	Hnf4a	Hepatocyte nuclear factor 4, alpha, isoform CRA_a OS=Rattus norvegicus OX=10116 GN=Hnf4a PE=1 SV=1	3	1	1	1	1	474	52.7	7.24	2.55	1	0	NA	NA	NA	NA	NA	NA	NA	NA	NA	NA	NA	NA
A0A0G2K0J7	Ctdp1	CTD phosphatase subunit 1 OS=Rattus norvegicus OX=10116 GN=Ctdp1 PE=1 SV=1	5	3	5	3	1	1030	113.3	6.06	11.03	3	0	NA	NA	NA	NA	NA	NA	NA	12459.34957	NA	NA	NA	NA
A0A0G2K0N6	#N/A	Uncharacterized protein OS=Rattus norvegicus OX=10116 PE=1 SV=1	10	1	1	1	1	97	10.7	7.12	2.14	1	0	484484.1793	299744.6875	172689.399	286371.0827	385290.5176	NA	1124856.7	NA	740290.4562	721044.5524	NA	927459.564
A0A0G2K0N7	Cyp2d3	Cytochrome P450 2D3 OS=Rattus norvegicus OX=10116 GN=Cyp2d3 PE=1 SV=1	40	17	60	8	1	504	56.9	6.76	149.75	17	1	1457753.327	1396725.053	1897527.771	927097.4047	1360764.773	1777138.508	2208477.255	106162894	804960.2721	944634.2675	1387378.069	1558051.778
A0A0G2K0P8	Slc44a1	CDW92 antigen, isoform CRA_b OS=Rattus norvegicus OX=10116 GN=Slc44a1 PE=1 SV=1	18	9	72	9	1	656	73	8.6	184.35	9	0	14580750.99	20025993.2	16423039.38	17674933.86	21008909.56	22650440.07	7607005.448	1647085.74	17333768.32	16886576.64	27816292.49	19715061.44
A0A0G2K0P9	Copb2	Uncharacterized protein OS=Rattus norvegicus OX=10116 PE=1 SV=1	32	15	259	1	1	733	82.6	6.77	634.74	15	0	2413062.917	1167743.625	4530006.457	2728358.47	3400032.715	1426230.53	1928616.082	4173710.63	8341438.923	9381666.235	5449675.881	4657813.532
A0A0G2K0Q8	Susd2	Sushi domain-containing 2 OS=Rattus norvegicus OX=10116 GN=Susd2 PE=1 SV=1	34	19	306	19	1	825	90.6	6.39	763.7	19	0	99076882.44	266067921.5	175081364.7	117239064.1	154405423.1	234710997.9	173632652.2	3417715.43	71537019.29	128939720.7	88416948.94	176374860.8
A0A0G2K0S1	Calcoco1	Calcium-binding and coiled-coil domain-containing protein 1-like OS=Rattus norvegicus OX=10116 GN=Calcoco1 PE=1 SV=1	2	1	6	1	1	715	79.7	4.86	16.53	1	0	331332.6055	462756.875	450104.8969	424813.1199	512521.1292	383516.588	1017140.178	NA	1214210.47	508652.3623	347325.9129	606064.9662
A0A0G2K0T2	Cd63	Tetraspanin OS=Rattus norvegicus OX=10116 GN=Cd63 PE=1 SV=1	7	1	10	1	1	262	28.5	8.41	23.91	1	0	283989.1893	969524.7656	NA	NA	NA	NA	2241664.927	NA	NA	3831325.955	3557295.801	2004838.668
A0A0G2K0T5	Micu1	Calcium uptake protein 1, mitochondrial OS=Rattus norvegicus OX=10116 GN=Micu1 PE=1 SV=1	1	1	11	1	1	481	54.8	8.66	12.19	1	0	556359.9801	779430.125	862719.2076	742812.8908	949034.931	701201.7773	858853.0173	NA	NA	NA	1079677.487	736690.6056
A0A0G2K0V3	Bpnt1	3'(2'),5'-bisphosphate nucleotidase 1 OS=Rattus norvegicus OX=10116 GN=Bpnt1 PE=1 SV=1	4	1	1	1	1	323	35	6.24	2.18	1	0	NA	NA	NA	NA	NA	NA	NA	NA	NA	NA	NA	NA
A0A0G2K0V4	Arhgef2	Rho guanine nucleotide exchange factor 2 OS=Rattus norvegicus OX=10116 GN=Arhgef2 PE=1 SV=1	17	17	99	17	1	1180	133.3	6.77	246.41	17	0	19767723.7	9521303.133	11955322.12	9747377.646	9624762.788	11109867.65	20750010.89	5473651.859	18709734.59	11858278.62	9735630.733	25223378.46
A0A0G2K0W5	Tjap1	Tight junction-associated protein 1 OS=Rattus norvegicus OX=10116 GN=Tjap1 PE=1 SV=1	3	1	1	1	1	553	61.2	6.07	2.04	1	0	NA	NA	NA	NA	NA	NA	NA	NA	NA	NA	NA	NA
A0A0G2K0W9	Psma7	Proteasome subunit alpha type OS=Rattus norvegicus OX=10116 GN=Psma7 PE=1 SV=1	47	9	69	9	1	248	27.8	8.46	148.72	9	0	12087473.86	13983143.8	10188305.34	9351200.67	17611775.33	9122865.93	12342795.73	31071586.33	27460117.06	7480011.797	12048087.59	13586689.18
A0A0G2K0Z3	Slc6a13	Transporter OS=Rattus norvegicus OX=10116 GN=Slc6a13 PE=1 SV=1	3	2	3	2	1	607	68.8	6.37	8.04	2	0	NA	763699.9375	NA	417596.8232	NA	671029.7181	NA	4119042.2	NA	NA	NA	NA
A0A0G2K110	Eif6	Eukaryotic translation initiation factor 6 OS=Rattus norvegicus OX=10116 GN=Eif6 PE=1 SV=1	37	5	36	5	1	246	26.7	4.81	92.02	5	0	18977253.41	15593586.02	12467291.37	14599626.58	19945992.83	17799747.49	19191287.24	11084027.93	7786892.492	7313173.241	11206257.63	19706103.48
A0A0G2K121	Mlec	Unc-119 lipid-binding chaperone B OS=Rattus norvegicus OX=10116 GN=Mlec PE=1 SV=1	46	11	142	11	1	294	32.8	5.55	286.03	11	0	29226374.79	29386752.25	28810583.4	20247611.33	33176871.28	29431524.74	19049239.35	71515781.44	27097467.62	25026035	39463001.96	40576196.33
A0A0G2K132	Fmnl2	Formin-like 2 OS=Rattus norvegicus OX=10116 GN=Fmnl2 PE=1 SV=1	13	12	62	8	1	1038	117.9	8.06	129.51	12	4	24039041.81	26491930.23	13864528.95	11926121.77	21892924.18	29805416.47	34007982.54	2338558.582	26762426.71	7078172.363	17022455.48	24620297.27
A0A0G2K135	Cfi	Complement factor I OS=Rattus norvegicus OX=10116 GN=Cfi PE=1 SV=1	15	6	35	6	1	626	69.7	7.52	92.92	6	0	1615058.156	1402488.969	2003754.123	1569921.596	1742439.112	1415472.882	4085069.331	5242906.769	1975294.531	10176221.25	5541494.478	4746250.096
A0A0G2K151	Apoe	Apolipoprotein E OS=Rattus norvegicus OX=10116 GN=Apoe PE=1 SV=1	35	16	312	16	1	359	41.2	5.83	799	16	0	93592287.64	83832088.23	99890567.28	87469582.27	81323597.73	84087599.89	464287400.5	359055508	558308115.4	290840964.4	229383324.5	392618284.5
A0A0G2K161	Epb41	Erythrocyte membrane protein band 4.1 OS=Rattus norvegicus OX=10116 GN=Epb41 PE=1 SV=1	23	17	125	14	1	866	96.8	5.45	291.51	17	2	56334100.67	51178698.56	35104167.12	27406911.1	90269491.8	81362535.18	34266511.5	10270694.2	13123367.18	11282995.31	9904437.347	17524784.41
A0A0G2K167	Rmdn1	Regulator of microtubule dynamics protein 1 OS=Rattus norvegicus OX=10116 GN=Rmdn1 PE=1 SV=1	3	1	4	1	1	320	36.8	8.41	10.31	1	0	NA	1201112.5	209690.2436	474977.9707	1203676.267	NA	1074935.682	953897.1799	NA	553974.4026	1350893.895	2542745.368
A0A0G2K199	P3h1	Leprecan 1, isoform CRA_c OS=Rattus norvegicus OX=10116 GN=P3h1 PE=1 SV=1	10	6	35	6	1	739	83.5	5.21	97.91	6	0	2808597.93	4702064.125	9008709.788	7299332.679	2148616.498	6047819.326	6429912.225	2206241.51	3757277.315	8247284.159	9957098.082	9110941.656
A0A0G2K1A2	Mpo	Myeloperoxidase OS=Rattus norvegicus OX=10116 GN=Mpo PE=1 SV=1	38	26	498	22	1	718	80.8	9.52	1075.36	26	4	291004238.9	513233882.4	778153117.4	509980604.8	598064159.8	535096742	97930532.53	10589314.97	127438865.7	325045139	239634320.2	410149775.2
A0A0G2K1A8	Plekha1	Pleckstrin homology domain-containing A1 OS=Rattus norvegicus OX=10116 GN=Plekha1 PE=4 SV=1	6	2	6	2	1	385	43.6	9.22	19.61	2	0	2361328.744	1468537.25	1146158.322	1183885.655	1393856.984	745563.4408	1282814.853	262034.8007	NA	162585.8357	244984.6656	685956.9555
A0A0G2K1B5	Rgs3	Regulator of G-protein-signaling 3 OS=Rattus norvegicus OX=10116 GN=Rgs3 PE=1 SV=1	1	1	5	1	1	1144	126.3	5.88	14.33	1	0	1291235.464	NA	1444300.912	1470549.489	1012534.4	1249812.384	NA	NA	1692942.723	NA	NA	NA
A0A0G2K1C0	Actr3	Actin-related protein 3 OS=Rattus norvegicus OX=10116 GN=Actr3 PE=1 SV=1	53	19	368	19	1	419	47.6	6.18	963.2	19	0	88121903.14	81256220.87	68998869.69	69099154.47	72501476.24	82693758.7	127933842.4	105375289.5	176651169	143907346.3	161936898.3	162165612.9
A0A0G2K1E2	Itga5	Integrin alpha 5 (Mapped) OS=Rattus norvegicus OX=10116 GN=Itga5 PE=1 SV=1	8	6	32	6	1	1099	119.4	6.28	75.46	6	0	2798190.624	3579326.578	3071932.295	1991152.993	3315454.992	3514092.031	3230065.767	2622415.965	3113178.684	1461426.743	3245864.856	2949272.988
A0A0G2K1F2	Acacb	Acetyl-CoA carboxylase beta OS=Rattus norvegicus OX=10116 GN=Acacb PE=1 SV=1	4	6	19	2	1	2455	276.2	6.25	49.99	6	0	NA	428566.2656	388457.9602	385990.0588	380063.0753	288926.6691	805181.6027	1502803.528	1010032.833	661102.5785	509591.1769	487327.4964
A0A0G2K1G5	Ltbp2	Latent transforming growth factor beta binding protein 2, isoform CRA_a OS=Rattus norvegicus OX=10116 GN=Ltbp2 PE=1 SV=1	1	1	6	1	1	1831	197	5.29	12.8	1	0	262192.1679	198468.2969	244921.853	NA	152266.3345	182889.9527	714758.4615	NA	324847.2396	217931.1819	254925.5245	390669.3896
A0A0G2K1J9	Slc2a2	Solute carrier family 2, facilitated glucose transporter member 2 OS=Rattus norvegicus OX=10116 GN=Slc2a2 PE=1 SV=1	9	5	11	5	1	522	57	6.93	28.06	5	0	21591.97795	50987.75	NA	49988.53275	99490.68189	NA	NA	83183571.91	NA	65726.24211	54965.18193	NA
A0A0G2K1K0	Olr1	Oxidized low density lipoprotein (Lectin-like) receptor 1, isoform CRA_a OS=Rattus norvegicus OX=10116 GN=Olr1 PE=4 SV=1	14	3	10	3	1	368	42.4	6.25	21.95	3	0	325835.8098	237968.7656	1789409.964	399711.2594	747652.9804	841063.0029	1201581.426	253809.3688	1490306.623	2560767.623	2432251.237	1763391.015
A0A0G2K1K5	Trappc11	Trafficking protein particle complex 11 OS=Rattus norvegicus OX=10116 GN=Trappc11 PE=1 SV=1	12	11	53	11	1	1193	135	8.13	133.79	11	0	14523906.77	19528819.47	12476227.46	14461038.92	15291027.2	13938239.39	16055160.11	6320351.655	17802585.13	9163494.521	14550503.19	16679966.61
A0A0G2K1L0	Tnc	Tenascin C OS=Rattus norvegicus OX=10116 GN=Tnc PE=1 SV=1	0	1	1	1	1	2019	221.6	4.92	0	1	0	126326.1067	NA	NA	NA	NA	164230.4091	270540.2786	278107.3212	335152.3245	NA	765342.8446	NA
A0A0G2K1L4	Reps2	RALBP1 associated Eps domain containing protein 2 OS=Rattus norvegicus OX=10116 GN=Reps2 PE=1 SV=1	18	8	29	7	1	574	63.4	8.84	64.59	8	1	9422305.677	8863174.125	7004130.07	11223480.09	15676953.18	10806367.97	8709852.506	734594.0194	14026449.67	1553348.313	10561248.81	15959387.97
A0A0G2K1L8	Basp1	Brain acid soluble protein 1 OS=Rattus norvegicus OX=10116 GN=Basp1 PE=1 SV=1	60	8	124	1	1	219	21.7	4.51	388.43	8	0	7286880.194	3476966.438	10926839.98	8887427.713	6217899.113	8107207.735	18849307.2	870299.708	45401960.55	23650489.27	16264024.23	19532780.97
A0A0G2K1M0	Taok2	Serine/threonine-protein kinase TAO2 OS=Rattus norvegicus OX=10116 GN=Taok2 PE=1 SV=1	4	4	14	2	1	1235	138.6	7.11	33.96	4	0	768674.0024	242172.4063	190922.5894	323123.349	380745.6711	231745.4678	390418.3334	163583.6525	NA	NA	427658.6609	632176.1821
A0A0G2K1M2	Dlg1	Disks large homolog 1 OS=Rattus norvegicus OX=10116 GN=Dlg1 PE=1 SV=1	15	11	61	10	1	917	101.1	5.71	148.36	11	1	10852728.98	11058727.34	11794469.94	11853334.14	11916730.03	12312004.47	18065698.67	12596551.29	10683911.72	4742010.541	12555181.79	12554472.18
A0A0G2K1M5	RGD1309079	Similar to Ab2-095 OS=Rattus norvegicus OX=10116 GN=RGD1309079 PE=1 SV=1	29	10	64	10	1	430	49.4	8.63	132.5	10	0	5013270.793	8761465.984	7393063.04	6396911.251	8698553.378	8661881.141	7138026.55	1937081.266	3473319.356	7567779.132	12179888.77	11410041.82
A0A0G2K1M7	Ano6	Anoctamin OS=Rattus norvegicus OX=10116 GN=Ano6 PE=1 SV=1	24	18	160	18	1	909	105.8	7.74	350.64	18	0	37917193.49	42550572.81	34767574.96	34038914.44	43671972.02	43240887.39	26121644.82	2843693.203	42808372.11	20012680.62	38514247.69	46831310.25
A0A0G2K1P3	Bnip2	BCL2-interacting protein 2 OS=Rattus norvegicus OX=10116 GN=Bnip2 PE=1 SV=1	5	2	8	2	1	331	38.3	4.93	6.8	2	0	1783818.617	834001.6875	1913558.585	1024199.457	883369.059	944005.9148	413263.0094	NA	1030578.371	498141.2706	1411757.309	1897078.059
A0A0G2K1Q8	Abca3	ATP-binding cassette subfamily A member 3 OS=Rattus norvegicus OX=10116 GN=Abca3 PE=1 SV=1	25	36	578	36	1	1704	191.6	7.11	1336.19	36	0	214854869.4	279368263.2	266415041.7	221630404.9	289425817.3	318702433.2	114042851.6	11677738.37	150502700.5	171913484	208074782.3	145380832.4
A0A0G2K1R4	Rdh5	Retinol dehydrogenase 5 OS=Rattus norvegicus OX=10116 GN=Rdh5 PE=1 SV=1	3	1	1	1	1	318	34.9	8.68	0	1	0	NA	NA	NA	NA	272892.053	NA	894920.283	71963451.89	720904.4735	353662.0955	388009.4611	668745.5228
A0A0G2K1S9	Ccm2	CCM2 scaffold protein OS=Rattus norvegicus OX=10116 GN=Ccm2 PE=1 SV=1	6	2	2	2	1	453	49.8	5.54	4.94	2	0	238541.7113	303073.375	308946.5425	NA	224539.979	155902.497	NA	NA	190928.7178	119668.3906	NA	NA
A0A0G2K1V3	Tsen15	Similar to RIKEN cDNA 5730449L18 (Predicted), isoform CRA_a OS=Rattus norvegicus OX=10116 GN=Tsen15 PE=1 SV=1	11	1	2	1	1	168	18.5	4.73	5.01	1	0	187516.1264	790340.625	455229.5608	1723252.857	346715.2287	NA	407849.9628	736158.9315	1210130.36	NA	757422.7159	617754.7979
A0A0G2K1W9	Ldhd	Lactate dehydrogenase D OS=Rattus norvegicus OX=10116 GN=Ldhd PE=1 SV=1	4	2	2	2	1	482	51.8	7.11	4.36	2	0	NA	NA	NA	989857.8533	735173.8156	NA	965697.2533	3003736.801	218370.3803	NA	NA	315817.2572
A0A0G2K1Z6	Rtkn2	Rhotekin 2 OS=Rattus norvegicus OX=10116 GN=Rtkn2 PE=1 SV=1	25	12	50	12	1	598	66.7	7.96	121.34	12	0	18722874.75	21648108.27	25231007.81	22508138.63	18677407.66	16192048.98	20955899.97	11725659.98	18983154.48	8772253.815	11893484.98	17674522.35
A0A0G2K1Z9	Hm13	Histocompatibility 13 (Predicted), isoform CRA_d OS=Rattus norvegicus OX=10116 GN=Hm13 PE=1 SV=1	18	6	80	6	1	378	41.7	6.23	115.24	6	0	20964342.76	18971669.75	26388226.96	22476719.32	25883986.98	21682801.94	6510078.891	13929476.91	15355517.76	21344208.25	26847844	17398506.9
A0A0G2K214	Zc3h7b	Zinc finger CCCH-type-containing 7B OS=Rattus norvegicus OX=10116 GN=Zc3h7b PE=1 SV=1	6	6	31	6	1	982	110.3	7.33	67.37	6	0	1884143.035	714714.2188	1006219.074	792612.5095	786171.0496	815674.4515	3760273.937	1071201.491	2267004.18	506288.333	1193352.024	2382767.97
A0A0G2K227	Slc6a6	Transporter OS=Rattus norvegicus OX=10116 GN=Slc6a6 PE=1 SV=1	3	1	17	1	1	631	71	6.7	41.47	1	0	842272.6875	939547.6563	1007779.151	362050.314	2130219.684	1448158.662	NA	NA	1569608.669	2062773.949	2873935.928	2036599.942
A0A0G2K238	Dpp4	Dipeptidyl peptidase 4 OS=Rattus norvegicus OX=10116 GN=Dpp4 PE=1 SV=1	35	26	667	3	1	789	90.6	6.4	1654.13	26	24	752725630.8	802206334.6	498674417	485128425.5	874037474.7	681523301.1	263840787.8	141659147.4	272519630.3	181689245.9	244025779.1	331403396.4
A0A0G2K248	Mat1a	S-adenosylmethionine synthase OS=Rattus norvegicus OX=10116 GN=Mat1a PE=1 SV=1	39	11	31	9	1	396	43.5	6.21	80.54	11	2	264135.8147	446801.0313	354545.2031	363172.2744	727532.3739	633923.0543	2016916.503	136894527.6	2062057.984	1091984.733	2288752.699	1454789.489
A0A0G2K261	Iars2	Isoleucyl-tRNA synthetase 2, mitochondrial OS=Rattus norvegicus OX=10116 GN=Iars2 PE=1 SV=1	28	21	173	21	1	1011	112.6	6.74	430.41	21	0	20604997.38	36558073.95	46880654.26	47085069.7	47858828.98	30694579.63	35744042.55	16449022.84	23950443.01	51699431.64	42552660.36	30638206.99
A0A0G2K277	Eci3	Enoyl-CoA delta isomerase 2, mitochondrial OS=Rattus norvegicus OX=10116 GN=Eci3 PE=1 SV=1	24	7	41	5	1	379	42.3	9.07	94.85	7	0	6532026.929	5335027.719	11646839.93	12038222.08	5178674.669	4566494.403	1744194.999	17138644	843674.4944	1024864.424	NA	2478737.114
A0A0G2K278	Gpx2	Glutathione peroxidase OS=Rattus norvegicus OX=10116 GN=Gpx2 PE=1 SV=1	71	11	62	11	1	189	21.8	8.15	135.92	11	0	17156555.37	18118236.16	11541751.58	15925255.94	18693824.72	12027653.27	8337383.832	683735.9842	12920654.96	16723874.04	12853468.46	9710843.079
A0A0G2K290	#N/A	Uncharacterized protein OS=Rattus norvegicus OX=10116 PE=4 SV=1	31	3	44	1	1	124	13.9	8.16	129.76	3	1	10670334.03	11621624.25	4418175.713	8125472.213	5792374.606	7945038.879	71078818.24	2653008.435	10832542.84	24235490.95	24552555.61	20200381.65
A0A0G2K2B3	Khsrp	Far upstream element-binding protein 2 OS=Rattus norvegicus OX=10116 GN=Khsrp PE=1 SV=1	3	2	2	2	1	748	76.7	7.33	4.67	2	0	68976.69785	109518.0859	NA	NA	86237.6693	NA	544613.1197	287816.9539	471645.5797	236412.3197	277257.35	187149.2499
A0A0G2K2B7	Wdr20	WD repeat domain 20 OS=Rattus norvegicus OX=10116 GN=Wdr20 PE=1 SV=1	3	1	2	1	1	584	64.6	7.64	5	1	0	69336.98877	149352.6719	NA	NA	196288.1109	NA	NA	118065.5587	156747.4435	NA	343928.5832	1037861.065
A0A0G2K2C2	Gmps	GMP synthase [glutamine-hydrolyzing] OS=Rattus norvegicus OX=10116 GN=Gmps PE=1 SV=1	6	3	6	3	1	700	77.8	6.86	15.17	3	0	24679.17277	33387.98828	NA	NA	79610.47259	NA	44167.19587	140130.0789	104873.5169	131907.9883	126458.3643	104037.5069
A0A0G2K2C7	Usp9x	Ubiquitin-specific peptidase 9, X-linked OS=Rattus norvegicus OX=10116 GN=Usp9x PE=1 SV=1	15	32	138	21	1	2554	290	5.82	309.58	32	11	8507056.92	12155525.14	12730756.19	9463653.603	16635065.77	9908614.413	17328449.38	13861670.61	48456579.86	20037227.07	25333727.07	28989133.47
A0A0G2K2D4	Agap3	ArfGAP with GTPase domain, ankyrin repeat and PH domain 3 OS=Rattus norvegicus OX=10116 GN=Agap3 PE=4 SV=1	8	4	29	4	1	812	88.3	8.25	61.75	4	0	3158670.372	1775034.609	1727265.236	1822849.911	2768368.943	1621352.116	1834213.995	139929.3654	1129406.591	835204.9842	1865235.174	2275959.675
A0A0G2K2D6	Tppp	Tubulin polymerization-promoting protein OS=Rattus norvegicus OX=10116 GN=Tppp PE=1 SV=1	6	1	2	1	1	235	25.6	9.55	4.43	1	0	641347.4206	513090.875	684860.8045	683366.6344	609020.9497	417465.1968	557665.0833	158043.7617	NA	NA	NA	290114.7863
A0A0G2K2E4	LOC100911252	Peptidyl-prolyl cis-trans isomerase OS=Rattus norvegicus OX=10116 GN=LOC100911252 PE=3 SV=1	45	7	108	1	1	164	17.8	6.9	275.4	7	0	721003.1168	NA	NA	1012896.73	NA	374375.5887	440884.9631	NA	NA	NA	NA	NA
A0A0G2K2I0	Suz12	SUZ12 polycomb repressive complex 2 subunit OS=Rattus norvegicus OX=10116 GN=Suz12 PE=1 SV=1	2	1	1	1	1	740	82.8	9.33	2.29	1	0	2778169.503	3974995.5	5195587.189	5947233.134	3586345.557	3289219.355	2458166.393	NA	1326463.173	2698157.974	1574491.175	1846872.64
A0A0G2K2J9	Ctage5	MIA SH3 domain ER export factor 2 OS=Rattus norvegicus OX=10116 GN=Mia2 PE=1 SV=1	25	17	102	17	1	807	91	5.24	257.1	17	0	26139678.08	24329367.28	32783234.03	22364485.95	30307504.99	31007955.48	13120809.39	46808173.34	11810194.13	13247718.36	26649373.77	19808539.49
A0A0G2K2K6	Clcn3	Chloride channel protein OS=Rattus norvegicus OX=10116 GN=Clcn3 PE=1 SV=1	2	1	1	1	1	866	96.5	6.15	3.37	1	0	NA	75507.94531	NA	52356.81453	180771.9197	90459.49325	NA	NA	NA	NA	NA	NA
A0A0G2K2L8	Cask	Peripheral plasma membrane protein CASK-like OS=Rattus norvegicus OX=10116 GN=LOC100910506 PE=1 SV=1	9	6	11	6	1	909	103.1	6.43	18.46	6	0	2223676.84	3662819.563	4431622.753	3323480.354	3213774.636	2863891.705	1393025.948	10309746.07	3742511.08	1381093.902	2799135.248	2983894.792
A0A0G2K2M2	Mff	Mitochondrial fission factor OS=Rattus norvegicus OX=10116 GN=LOC102556337 PE=1 SV=1	7	3	11	3	1	353	39.7	8.94	26.3	3	0	2979486.851	7791459.813	10118203.67	4997015.439	5880322.176	6861840.445	3821283.456	1117357.728	2085200.056	4900569.906	3720950.893	3353952.522
A0A0G2K2M9	Srrm2	Serine/arginine repetitive matrix 2 OS=Rattus norvegicus OX=10116 GN=Srrm2 PE=1 SV=1	2	4	9	4	1	2707	295.9	12.02	19.79	4	0	10222951.75	580029.4375	769117.4338	935872.8779	1058120.542	566037.2643	NA	282092.2413	972883.5304	672692.0222	773457.0998	1700982.72
A0A0G2K2P3	Tnfaip8	TNF alpha-induced protein 8 OS=Rattus norvegicus OX=10116 GN=Tnfaip8 PE=4 SV=1	5	1	5	1	1	192	22.2	8.92	2.14	1	0	215582.6335	190318.4844	NA	159698.7635	193437.9834	274337.3602	214448.937	NA	389654.5136	403201.136	377363.4077	304021.055
A0A0G2K2P4	Cyp2t1	Cytochrome P450, family 2, subfamily t, polypeptide 1 OS=Rattus norvegicus OX=10116 GN=Cyp2t1 PE=1 SV=1	15	6	11	6	1	497	56.2	6.8	24.78	6	0	1587471.921	1674030.109	1525836.662	556804.6437	2306131.232	2245390.931	641003.6607	11185822.07	591493.5224	843451.0913	600431.3821	928367.3525
A0A0G2K2P5	Tjp1	Tight junction protein ZO-1 OS=Rattus norvegicus OX=10116 GN=Tjp1 PE=1 SV=1	17	24	212	24	1	1765	197	6.6	562.67	24	0	73999134.82	56202707.06	50198063.32	54102695.93	35397758.73	55562380.81	51924519.67	6540602.808	40277816.97	41300213.3	45768841.43	76416481.75
A0A0G2K2P6	Hbs1l	HBS1-like protein OS=Rattus norvegicus OX=10116 GN=Hbs1l PE=1 SV=1	8	4	9	4	1	679	74.8	6.6	20.48	4	0	1305054.773	973784.2188	1151533.604	1134291.891	668788.6382	186213.2912	1840613.357	1409092.426	2021676.121	977322.3211	NA	1927761.067
A0A0G2K2P7	Acvr1	Serine/threonine-protein kinase receptor OS=Rattus norvegicus OX=10116 GN=Acvr1 PE=3 SV=1	2	1	1	1	1	528	59.2	7.18	2.07	1	0	282632.6438	265009.9688	251546.32	261547.9921	366814.5587	227067.7927	NA	NA	518000.9286	251739.6724	314623.8516	175802.6274
A0A0G2K2Q2	Gcat	Glycine C-acetyltransferase OS=Rattus norvegicus OX=10116 GN=Gcat PE=1 SV=1	18	5	5	5	1	416	45.2	7.65	12.4	5	0	213077.4849	273227.0938	510771.5758	370749.5135	1030459.799	234616.6145	NA	4973443.984	NA	308185.3691	258130.1847	NA
A0A0G2K2U7	Gpam	Glycerol-3-phosphate acyltransferase 1, mitochondrial OS=Rattus norvegicus OX=10116 GN=Gpam PE=1 SV=1	8	4	19	4	1	828	93.7	8.07	53.63	4	0	275222.3841	873994.2813	1055761.489	942713.7344	1099787.054	926042.0237	664630.2281	3374095.959	313952.4769	2329867.539	2570709.637	1051102.519
A0A0G2K2V5	Exoc1	Exocyst complex component 1 OS=Rattus norvegicus OX=10116 GN=Exoc1 PE=1 SV=1	8	5	35	1	1	721	81.9	6.42	84.44	5	4	5761042.818	5959686.281	6170708.872	5331550.145	4310524.453	4451822.647	6087484.375	2597246.244	4935320.273	1791825.799	4986957.448	5272204.991
A0A0G2K2V6	Krt10	Keratin, type I cytoskeletal 10 OS=Rattus norvegicus OX=10116 GN=Krt10 PE=1 SV=1	13	8	94	6	1	559	56.8	5.11	213.95	8	1	8036046.949	52747904	12758779.91	10604588.5	11906021.52	35920986.78	6851881.268	40191169.96	34192703.12	65520152.7	50674036.93	22630939.77
A0A0G2K2W0	Ptprb	Protein tyrosine phosphatase, receptor type, B OS=Rattus norvegicus OX=10116 GN=Ptprb PE=1 SV=1	6	11	34	11	1	2238	250	7.52	82.49	11	0	7188016.6	7991219	7078107.816	5196011.368	6630070.362	6843663.795	2104249.385	1136299.798	872092.1998	578421.2638	1092571.86	2280086.906
A0A0G2K2W1	#N/A	Uncharacterized protein OS=Rattus norvegicus OX=10116 PE=1 SV=1	1	1	10	1	1	1613	176.5	5.97	19.27	1	0	12080071.51	18839349.75	14625579.43	14517728.81	15091805.07	15326037	29286043.74	6367355.975	32830194.26	22021739.24	18874929.48	18090642.54
A0A0G2K2W5	Myl7	Myosin light chain 7 OS=Rattus norvegicus OX=10116 GN=Myl7 PE=1 SV=1	18	2	4	2	1	175	19.5	4.81	8.52	2	0	285057.2775	242988.3438	147367.6107	175181.3435	163711.4851	NA	NA	NA	119482.9697	664103.7198	NA	NA
A0A0G2K2Y8	Mpdz	Multiple PDZ domain protein OS=Rattus norvegicus OX=10116 GN=Mpdz PE=1 SV=1	1	1	2	1	1	2068	220	5.05	3.9	1	0	NA	NA	NA	NA	NA	NA	NA	NA	NA	NA	NA	NA
A0A0G2K2Z0	Eml4	Echinoderm microtubule-associated protein-like 4 OS=Rattus norvegicus OX=10116 GN=Eml4 PE=1 SV=1	20	15	81	15	1	914	101.8	6.92	146.57	15	0	26207542.18	14573754.55	15500706.28	15248469.68	18291678.58	12239465.39	17876181.67	12062758.21	24868716.76	12065008.35	12298903.98	25660038.04
A0A0G2K309	Slc25a15	Mitochondrial ornithine transporter 1 OS=Rattus norvegicus OX=10116 GN=Slc25a15 PE=1 SV=1	15	3	9	3	1	301	32.8	8.9	25.22	3	0	246301.2329	443739.625	886886.7723	671407.6126	743392.0858	506619.1163	381717.5712	13593116.47	87121.05853	531762.1473	980105.4495	287596.2358
A0A0G2K318	Myo5b	Unconventional myosin-Vb OS=Rattus norvegicus OX=10116 GN=Myo5b PE=1 SV=1	8	13	70	10	1	1846	213.8	7.06	150.98	13	2	8379670.347	8259262.891	9736078.64	7009926.908	6261938.629	7747640.5	10662050.31	760546.8102	4936499.08	6767020.378	12009007.23	11458107.1
A0A0G2K320	Siglec1	Sialic acid-binding Ig-like lectin 1 OS=Rattus norvegicus OX=10116 GN=Siglec1 PE=1 SV=1	28	33	180	33	1	1693	182.5	6.7	460.97	33	0	5456993.843	6579894.984	10619659.68	12687499.25	7116537.448	6512053.596	26512699.41	24655942	51386196.28	61600359.18	82074381.17	50831689.29
A0A0G2K344	Pik3ca	Phosphatidylinositol 4,5-bisphosphate 3-kinase catalytic subunit alpha isoform OS=Rattus norvegicus OX=10116 GN=Pik3ca PE=1 SV=1	1	1	4	1	1	1068	124.3	7.15	5.95	1	0	176631.1199	183545.2813	218984.1776	199492.4009	229610.2775	156834.8337	181611.6224	164636.6515	382378.9452	222566.9175	315018.8169	389187.6077
A0A0G2K350	Napg	NSF attachment protein gamma OS=Rattus norvegicus OX=10116 GN=Napg PE=1 SV=1	26	8	82	8	1	312	34.6	5.41	179.04	8	0	29778027.71	29201561.5	27028953.9	23289100.4	28387654.4	21898690.44	21166031.5	12196929.79	16023780.97	10135328.54	16832793.04	20140067.99
A0A0G2K366	Rps6ka5	Ribosomal protein S6 kinase OS=Rattus norvegicus OX=10116 GN=Rps6ka5 PE=1 SV=1	4	3	6	3	1	798	89.3	7.27	12.67	3	0	1831483.951	NA	334898.8332	307850.6408	215173.9202	NA	201140.7659	346549.3171	1730236.898	565532.8217	751185.7159	2101133.47
A0A0G2K383	Ppfibp2	PPFIA-binding protein 2 OS=Rattus norvegicus OX=10116 GN=Ppfibp2 PE=1 SV=1	10	7	27	5	1	970	108.8	6.07	58.29	7	2	3052030.545	2608480.703	2745093.483	3214944.545	2324886.832	2320450.209	2396499.032	3228216.963	3970836.984	1603127.99	3761363.548	4325904.667
A0A0G2K387	#N/A	Uncharacterized protein OS=Rattus norvegicus OX=10116 PE=4 SV=1	6	1	3	1	1	126	14.3	8.21	2.06	1	0	NA	NA	NA	NA	NA	NA	NA	NA	NA	NA	NA	NA
A0A0G2K3A0	Wnk1	Serine/threonine-protein kinase WNK1 OS=Rattus norvegicus OX=10116 GN=Wnk1 PE=1 SV=1	5	9	39	8	1	2164	229.4	6.81	91.27	9	1	6732279.497	4494856.203	4850430.221	6665399.49	6702450.819	2959395.16	12298638.86	1984169.319	9993849.529	6776382.095	6901157.926	4398734.677
A0A0G2K3B0	Grb14	Growth factor receptor-bound protein 14 OS=Rattus norvegicus OX=10116 GN=Grb14 PE=1 SV=1	11	5	5	5	1	538	60.6	8.54	11.25	5	0	NA	NA	379043.7235	67815.20418	NA	309897.5197	161187.4889	3654365.956	145456.5116	NA	NA	NA
A0A0G2K3B2	Selenot	Selenoprotein T OS=Rattus norvegicus OX=10116 GN=Selenot PE=1 SV=1	7	1	15	1	1	195	22.2	8.6	31.31	1	0	1198387.654	1516037.375	1989008.08	2158464.831	1610586.261	1418908.321	964370.2387	1644579.612	106771.0833	121977.2671	2709107.565	1979860.634
A0A0G2K3C5	Cth	Cystathionine gamma-lyase OS=Rattus norvegicus OX=10116 GN=Cth PE=1 SV=1	37	12	19	12	1	398	43.6	7.8	50.34	12	0	6296851.574	8108375.945	6673198.209	14795332.42	8363913.85	7723849.566	11171345.79	300910186	4245759.005	6203695.451	2780703.127	3462476.479
A0A0G2K3F1	RGD1565059	Similar to hypothetical protein E130311K13 OS=Rattus norvegicus OX=10116 GN=RGD1565059 PE=1 SV=1	3	1	2	1	1	294	33.8	9.92	4.29	1	0	1321442.516	2186213.25	6239102.397	5146289.389	1464172.072	3592439.384	376093.7902	240789.6426	NA	NA	1051552.806	NA
A0A0G2K3G0	Hrg	Histidine-rich glycoprotein OS=Rattus norvegicus OX=10116 GN=Hrg PE=1 SV=1	40	18	423	18	1	536	60.3	7.83	1075.35	18	0	155105515.7	41873652.49	37265089.89	58032211.18	48211841.3	48614917.74	439304485.2	66702735.21	298909390.2	193474482.1	287325858.7	485291550
A0A0G2K3H2	Dock7	Dedicator of cytokinesis 7 OS=Rattus norvegicus OX=10116 GN=Dock7 PE=1 SV=1	11	19	85	16	1	2129	241.1	6.79	187.11	19	3	18758903.61	15523950.59	16964866.37	14250402.26	16571382.31	17251965.93	13895718.55	6298884.847	17430035.48	18777083.45	20479142.96	24301273.54
A0A0G2K3I9	Dusp3	Dual-specificity phosphatase 3 OS=Rattus norvegicus OX=10116 GN=Dusp3 PE=1 SV=1	36	5	105	5	1	211	23.1	5.85	293.58	5	0	5966366.518	7421555.563	6625510.426	6075806.501	9054856.623	5521792.177	13940171.63	5721482.598	11981110.87	12919795.02	10407049.85	12386836.63
A0A0G2K3K2	Actb	Actin, cytoplasmic 1 OS=Rattus norvegicus OX=10116 GN=Actb PE=1 SV=1	74	28	1382	11	1	378	42.1	5.48	3760.37	28	21	8972175372	12318339424	12397934634	9536495208	9723970907	11561377467	12097164019	2868727834	15055617838	12703788518	10503585198	11530738989
A0A0G2K3L5	#N/A	Uncharacterized protein OS=Rattus norvegicus OX=10116 PE=4 SV=1	27	2	6	1	1	115	12.8	7.84	17.88	2	0	NA	NA	NA	NA	NA	NA	NA	NA	NA	NA	NA	NA
A0A0G2K3L8	Wdfy1	WD repeat and FYVE domain-containing 1 OS=Rattus norvegicus OX=10116 GN=Wdfy1 PE=1 SV=1	21	7	43	7	1	410	46.1	7.34	109.85	7	0	9271974.024	7515895.125	5968895.806	5568417.376	6790381.397	6562105.792	3691548.186	2237303.871	10073677.24	3563608.706	11012520.22	10472768.25
A0A0G2K3P6	Fcgr1a	Fc fragment of IgG receptor Ia OS=Rattus norvegicus OX=10116 GN=Fcgr1a PE=4 SV=1	13	4	16	4	1	362	40.8	7.46	30.43	4	0	1438177.407	1303074.203	393316.7055	521085.1999	1588059.157	844660.1309	2737542.18	2412251.415	6140462.628	7045167.64	8052766.694	5696146.683
A0A0G2K3P7	Atp11b	Phospholipid-transporting ATPase OS=Rattus norvegicus OX=10116 GN=Atp11b PE=1 SV=1	8	8	35	5	1	1126	127.1	6.71	66.36	8	0	7228620.7	8105661.75	3556482.956	3577560.068	12091853.25	5329126.23	5912348.38	1762569.472	16459453.85	11117715.61	14135404.12	15989282.59
A0A0G2K3Q6	Aldoc	Fructose-bisphosphate aldolase OS=Rattus norvegicus OX=10116 GN=Aldoc PE=1 SV=1	12	3	16	1	1	373	40.5	6.86	41.29	3	0	112724.7837	179574.7188	172637.7959	294525.8537	360244.6913	128223.9893	157575.3882	NA	233323.1264	244818.7348	296210.1811	220095.8649
A0A0G2K3S4	Abca9	ATP-binding cassette subfamily A member 9 OS=Rattus norvegicus OX=10116 GN=Abca9 PE=1 SV=1	8	10	45	5	1	1623	183.1	7.4	83.64	10	0	989110.5577	1573500.875	1533614.325	1111586.383	1602232.595	1292927.191	2112381.153	1657440.092	4044928.691	3705394.209	4567022.203	3542162.317
A0A0G2K3T0	Acoxl	Acyl-coenzyme A oxidase OS=Rattus norvegicus OX=10116 GN=Acoxl PE=3 SV=1	29	16	125	5	1	622	70	8.31	294.21	16	11	59290731.42	62396419.84	108329361	93604524.09	98937489.53	68607281.7	3288046.933	168479.7391	542712.7534	12956953.28	17450598.07	9392434.436
A0A0G2K3V4	Ogt	O-linked N-acetylglucosamine (GlcNAc) transferase (UDP-N-acetylglucosamine:polypeptide-N-acetylglucosaminyl transferase), isoform CRA_a OS=Rattus norvegicus OX=10116 GN=Ogt PE=1 SV=1	3	2	2	2	1	1046	116.9	6.7	5.81	2	0	NA	NA	NA	NA	112227.2936	NA	399167.093	NA	180772.2733	212566.8319	178141.8486	NA
A0A0G2K3W1	Vwa8	von Willebrand factor A domain-containing 8 OS=Rattus norvegicus OX=10116 GN=Vwa8 PE=1 SV=1	20	7	66	7	1	481	53.7	8.76	133.08	7	0	3465066.019	5952760.953	6493979.234	6295488.007	6320703.482	5775224.072	3700534.314	10050202.5	3803606.288	8211217.982	8635140.67	5787514.719
A0A0G2K3Z9	#N/A	Uncharacterized protein OS=Rattus norvegicus OX=10116 PE=4 SV=1	75	17	410	15	1	199	22.2	8.4	1008.33	17	2	365687523	322456263	376628639.3	414074799.6	411718426.4	374321557.2	531821465.3	1397319988	388180039.3	485298959.7	455326012.7	304955657.5
A0A0G2K401	Pcca	Propionyl-CoA carboxylase alpha chain, mitochondrial OS=Rattus norvegicus OX=10116 GN=Pcca PE=1 SV=1	31	19	125	19	1	723	79.8	7.21	302.29	19	0	36633564.1	48441869.41	67915115.26	66890583.5	48955484.02	37764471.02	23017978.31	55763178.72	15740290.2	27080135.67	22926574.11	18316126.88
A0A0G2K402	Myef2	Myelin expression factor 2 OS=Rattus norvegicus OX=10116 GN=Myef2 PE=1 SV=1	2	1	7	1	1	591	63.3	8.94	10.81	1	0	164691.3661	168126.2344	133143.3189	78124.58112	164062.8361	313480.9819	223593.0524	41991.61499	NA	110817.3659	42763.0953	121037.5767
A0A0G2K427	Ivns1abp	Influenza virus NS1A binding protein (Predicted), isoform CRA_b OS=Rattus norvegicus OX=10116 GN=Ivns1abp PE=1 SV=1	2	1	1	1	1	642	71.5	5.41	2.48	1	0	NA	NA	NA	NA	NA	NA	NA	NA	NA	NA	NA	NA
A0A0G2K428	Dctn1	Dynactin subunit 1 OS=Rattus norvegicus OX=10116 GN=Dctn1 PE=1 SV=1	35	35	325	35	1	1263	139.8	5.69	839.8	35	0	52776295.18	50176289.29	57253656.12	56407469.05	62652350.31	45131421.65	133128415.1	28834170.52	133419405.9	88623545.98	79510177.26	115572935
A0A0G2K435	Dnajc7	DnaJ heat shock protein family (Hsp40) member C7 OS=Rattus norvegicus OX=10116 GN=Dnajc7 PE=1 SV=1	6	3	11	3	1	579	65.5	8.38	29.55	3	0	194610.1779	132000.7813	94924.98165	198607.7503	296145.1391	256087.8852	315634.6008	2130371.471	4243304.32	1426514.83	799641.1705	70091.39226
A0A0G2K437	Amfr	Autocrine motility factor receptor OS=Rattus norvegicus OX=10116 GN=Amfr PE=1 SV=1	4	2	5	2	1	630	71.4	6.39	12.01	2	0	951108.7077	757813.75	616481.9625	NA	1116007.152	777994.5558	881377.363	2884310.737	NA	225389.3315	952941.8728	906713.6116
A0A0G2K459	Mtch2	Mitochondrial carrier 2 OS=Rattus norvegicus OX=10116 GN=Mtch2 PE=1 SV=1	44	10	200	10	1	303	33.7	8.94	396.42	10	0	43454893.77	66067216.02	70956630.75	65626605.24	64483804	48023087.31	31409959.16	157890857.4	33339975.4	74509936.24	85898888.33	53380913.59
A0A0G2K463	Pde4dip	Myomegalin OS=Rattus norvegicus OX=10116 GN=Pde4dip PE=1 SV=1	1	1	1	1	1	2356	264.8	5.33	2.28	1	0	NA	NA	NA	NA	NA	NA	NA	NA	NA	NA	NA	NA
A0A0G2K464	Scamp5	Secretory carrier-associated membrane protein OS=Rattus norvegicus OX=10116 GN=Scamp5 PE=1 SV=1	5	1	6	1	1	235	26.1	8.54	14.07	1	0	689426.9847	NA	1261460.003	856677.7876	773884.8963	947386.8885	482541.7396	436855.9996	1430003.08	781752.2583	803905.5051	1346563.339
A0A0G2K470	Itga2	Integrin subunit alpha 2 OS=Rattus norvegicus OX=10116 GN=Itga2 PE=3 SV=1	15	12	42	12	1	1178	128.8	5.2	101.93	12	0	3695353.913	4461515.891	4639761.265	4777983.207	5583094.491	5300883.318	5171641.651	1986063.13	5943933.622	3517031.567	3449477.2	6025897.366
A0A0G2K477	#N/A	Uncharacterized protein OS=Rattus norvegicus OX=10116 PE=4 SV=1	34	10	185	1	1	466	51.1	7.74	447.29	10	6	16518008.66	13026229.19	16790188.73	10150908.1	6630186.15	12459398.55	16655813.12	3492142.774	17239985.74	40268113.15	19258407.76	23096584.7
A0A0G2K4B4	Acpp	Prostatic acid phosphatase OS=Rattus norvegicus OX=10116 GN=Acpp PE=3 SV=1	7	2	3	2	1	417	47.9	7.14	4.96	2	0	156738.7332	467291.9063	NA	111303.8514	354033.8702	NA	NA	NA	228365.0544	412754.9534	NA	250738.1987
A0A0G2K4D9	Stag2	Stromal antigen 2 OS=Rattus norvegicus OX=10116 GN=Stag2 PE=1 SV=1	1	1	1	1	1	1268	145.6	5.49	0	1	0	56594.66838	72688.6875	NA	97819.3334	NA	123535.3591	434848.2019	NA	NA	NA	264376.3851	NA
A0A0G2K4G3	Nedd8	NEDD8 OS=Rattus norvegicus OX=10116 GN=Nedd8 PE=1 SV=1	28	2	5	2	1	81	9	5.48	13.46	2	0	1375344.467	979157.4375	1414717.317	NA	611324.3571	1239520.444	1271762.751	NA	1411036.181	1411864.064	1806002.886	1598662.185
A0A0G2K4I9	F11	Coagulation factor XI OS=Rattus norvegicus OX=10116 GN=F11 PE=1 SV=1	8	4	4	4	1	622	69.6	8.12	11.54	4	0	NA	NA	2776644.009	1663507.414	181540.4463	2771000.356	431551.6822	3384195.813	2792593.759	911313.1786	1485974.366	3270324.496
A0A0G2K4K2	#N/A	Uncharacterized protein OS=Rattus norvegicus OX=10116 PE=1 SV=1	17	2	7	1	1	96	10.4	6.48	7.42	2	0	1146358.041	670056.25	381647.8364	553534.0366	61155.47433	869749.538	1223866.274	258112.8193	816702.552	1701514.312	1089672.272	427450.5459
A0A0G2K4L3	Fam134b	Reticulophagy regulator 1 OS=Rattus norvegicus OX=10116 GN=LOC103689968 PE=1 SV=1	1	1	1	1	1	751	83.8	5.05	2.02	1	0	104772.1406	71096.14063	NA	NA	NA	NA	NA	501402.7557	NA	NA	NA	NA
A0A0G2K4M3	Ccpg1	Cell cycle progression 1 OS=Rattus norvegicus OX=10116 GN=Ccpg1 PE=1 SV=1	2	1	2	1	1	642	73	5.86	4.79	1	0	NA	NA	NA	NA	NA	NA	NA	NA	NA	NA	NA	NA
A0A0G2K4P4	Bbof1	Basal body orientation factor 1 OS=Rattus norvegicus OX=10116 GN=Bbof1 PE=4 SV=1	2	1	2	1	1	528	62.1	8.88	4.58	1	0	NA	NA	NA	NA	NA	NA	NA	NA	NA	NA	NA	NA
A0A0G2K4R1	Ppp1r12c	Protein phosphatase 1, regulatory subunit 12C OS=Rattus norvegicus OX=10116 GN=Ppp1r12c PE=1 SV=1	5	3	9	3	1	784	84.7	5.95	24.26	3	0	1983150.653	1858764.688	2444016.41	2028904.71	1501936.854	2111319.736	1131591.491	1496796.618	1713241.001	1007649.331	NA	1416292.538
A0A0G2K4R9	Eogt	EGF domain-specific O-linked N-acetylglucosamine transferase OS=Rattus norvegicus OX=10116 GN=Eogt PE=4 SV=1	20	10	51	10	1	565	65.5	6.49	114.11	10	0	4660698.641	5877530.961	5841259.611	6127376.615	7242084.186	5338200.05	4056294.996	817763.6467	3549889.772	2261111.98	5990258.454	6306783.864
A0A0G2K4S4	Ddx51	DEAD-box helicase 51 OS=Rattus norvegicus OX=10116 GN=Ddx51 PE=3 SV=1	2	1	1	1	1	635	70.1	9.03	2.28	1	0	1298382.672	1177262	1030983.622	2109263.848	1029068.119	1349348.42	6477372.466	1261265.556	3801864.436	2156399.879	2683546.375	2837936.42
A0A0G2K4T3	Acap2	Arf-GAP with coiled-coil, ANK repeat and PH domain-containing protein 2 OS=Rattus norvegicus OX=10116 GN=Acap2 PE=1 SV=1	27	16	94	16	1	809	91.5	6.43	232.54	16	0	22371293.01	15807531.98	20780796.53	12872422.86	20333986.63	18520143.77	17837415.63	2465111.097	21997327.79	16642712.28	16860687.32	26243901.02
A0A0G2K4T8	Mipep	Mitochondrial intermediate peptidase OS=Rattus norvegicus OX=10116 GN=Mipep PE=1 SV=1	3	2	3	2	1	711	80.8	6.57	5.83	2	0	642877.9999	992629.9063	1131963.917	1270807.153	885187.3613	1053819.989	541106.3703	955537.2467	242859.288	663279.3082	1344348.86	371398.0584
A0A0G2K4U6	Ilf3	Interleukin enhancer-binding factor 3 OS=Rattus norvegicus OX=10116 GN=Ilf3 PE=1 SV=1	5	3	7	3	1	915	98	8.78	17.63	3	0	1353099.423	73095.55469	56251.99335	NA	470306.7771	467514.341	927813.9891	176462.1106	882213.3296	910191.6156	1721122.652	748755.489
A0A0G2K4V5	Itgb4	Integrin beta OS=Rattus norvegicus OX=10116 GN=Itgb4 PE=1 SV=1	2	2	3	2	1	1807	200.5	5.9	2.83	2	0	NA	NA	97520.65302	NA	NA	165952.8783	NA	NA	95145.66276	88902.96471	13613.6523	93286.87899
A0A0G2K4X8	Skp1	S-phase kinase-associated protein 1 OS=Rattus norvegicus OX=10116 GN=Skp1 PE=1 SV=1	31	5	51	5	1	165	18.9	4.54	111.7	5	0	9785774.773	10956015.19	10941951.08	10539812.65	12570152.42	8846229.523	17435062.62	3073682.377	18991041.04	14109677	11954886.05	11173514.74
A0A0G2K4Y7	Myo5a	Unconventional myosin-Va OS=Rattus norvegicus OX=10116 GN=Myo5a PE=1 SV=1	5	7	40	3	1	1828	212	8.59	78.79	7	0	625736.3128	22513.82617	466933.4756	329450.8369	393506.2134	NA	2249420.682	288991.4368	3635937.74	2200917.55	3551097.371	2174536.81
A0A0G2K500	Npnt	Nephronectin OS=Rattus norvegicus OX=10116 GN=Npnt PE=1 SV=1	13	6	46	6	1	596	65.4	8.21	110.18	6	0	7039902.035	10777650	11111085.45	9158252.032	9626186.631	12606490.52	3386097.63	NA	5350263.222	16420919.1	9595732.878	8911151.699
A0A0G2K502	Me2	Malic enzyme OS=Rattus norvegicus OX=10116 GN=Me2 PE=1 SV=1	41	17	143	17	1	591	66.3	7.91	361.03	17	0	31547667.67	42669905.33	54325068.33	51453516.54	50163049.95	41116496.08	29985666.19	21223319.08	22748841.61	49979084.42	30084592.92	26961545.85
A0A0G2K516	Stx11	Syntaxin 11 OS=Rattus norvegicus OX=10116 GN=Stx11 PE=3 SV=1	27	6	25	6	1	287	33.2	6.65	61.01	6	0	5006609.839	6645000.953	6193807.476	4766563.889	6048690.118	6565752.46	3689449.804	NA	4135552.724	3354740.832	3713306.188	4006226.296
A0A0G2K528	Stx16	Syntaxin 16 OS=Rattus norvegicus OX=10116 GN=Stx16 PE=1 SV=1	20	5	44	5	1	309	35.4	5.52	107.1	5	0	4223322.147	4259484.25	2806424.345	1891213.847	7123652.925	3752018.996	3479807.163	211991.0918	3529224.344	4404902.464	6121495.16	8009405.105
A0A0G2K543	C2cd5	C2 calcium-dependent domain-containing 5 OS=Rattus norvegicus OX=10116 GN=C2cd5 PE=1 SV=1	3	3	7	3	1	1082	118.9	6.33	16.04	3	0	1684225.061	993849.2969	3267665.394	3130295.135	1147319.991	2600489.214	1206682.079	629068.0514	2053789.418	281227.0726	1002634.021	278333.5302
A0A0G2K548	Akap9	A-kinase-anchoring protein 9 OS=Rattus norvegicus OX=10116 GN=Akap9 PE=1 SV=1	1	3	4	3	1	3847	441.3	5.06	10.16	3	0	37516.68356	NA	NA	136611.7266	136960.9118	NA	247401.9849	371958.1395	448988.7614	551164.8731	500931.4256	611890.6918
A0A0G2K549	Aspdh	Putative L-aspartate dehydrogenase OS=Rattus norvegicus OX=10116 GN=Aspdh PE=1 SV=1	22	5	7	5	1	342	35.9	7.84	21.56	5	0	1069480.558	828565.75	1202832.755	809926.3082	361143.402	434676.7573	413753.7448	17226074.88	NA	558987.007	685516.7607	NA
A0A0G2K583	Mtap	S-methyl-5'-thioadenosine phosphorylase OS=Rattus norvegicus OX=10116 GN=Mtap PE=1 SV=1	39	8	41	8	1	283	31.1	7.18	101.62	8	0	5308802.367	7012837.633	5097640.895	3600306.617	8113055.759	5144557.84	5272675.387	423006.6776	6814050.283	4788049.917	2813477.752	5924858.696
A0A0G2K595	Slc23a1	Solute carrier family 23 member 1 OS=Rattus norvegicus OX=10116 GN=Slc23a1 PE=1 SV=1	2	1	1	1	1	666	72.1	6.76	3.81	1	0	NA	NA	NA	NA	NA	NA	NA	NA	NA	NA	NA	NA
A0A0G2K598	Tacc2	Transforming, acidic coiled-coil-containing protein 2 OS=Rattus norvegicus OX=10116 GN=Tacc2 PE=1 SV=1	0	1	1	1	1	2876	304.6	4.81	2.97	1	0	NA	NA	NA	NA	NA	NA	NA	NA	NA	NA	NA	NA
A0A0G2K5A7	Setdb1	Histone-lysine N-methyltransferase OS=Rattus norvegicus OX=10116 GN=Setdb1 PE=1 SV=1	1	1	4	1	1	1322	146	6.05	11.36	1	0	270739.425	86472.30469	158033.3278	116047.5779	105692.9738	195648.6719	128367.5778	NA	4668455.831	861183.6416	59984.23722	136310.4767
A0A0G2K5C6	Map1a	Microtubule-associated protein 1A OS=Rattus norvegicus OX=10116 GN=Map1a PE=1 SV=1	1	2	8	1	1	3014	325.4	4.97	12.7	2	0	NA	NA	NA	NA	NA	NA	358598.1012	NA	NA	NA	NA	156246.6628
A0A0G2K5C8	Stim1	Stromal interaction molecule 1 OS=Rattus norvegicus OX=10116 GN=Stim1 PE=1 SV=1	20	12	167	12	1	716	80.9	6.62	373.77	12	0	30005320.45	32639562.05	37688796.75	23913525.65	29918471.01	42222031.83	16600812.69	15761873.34	16104768.17	18223513.92	28224342.34	37417468.98
A0A0G2K5D2	#N/A	Uncharacterized protein OS=Rattus norvegicus OX=10116 PE=1 SV=1	19	2	7	2	1	126	13.5	9.17	17.24	2	0	2908390.518	5557515.125	3875588.843	3633222.36	2180388.157	4324979.506	6090703.552	416652.7269	2318551.096	6145601.89	1415152.511	2558272.497
A0A0G2K5D3	#N/A	Uncharacterized protein OS=Rattus norvegicus OX=10116 PE=4 SV=1	4	5	18	1	1	1683	188.7	6.54	29.37	5	4	490645.1412	523503.7813	678645.6156	448175.9904	641181.0228	607860.9967	1970247.455	403485.5623	2785904.985	2638209.838	2068705.032	2868920.554
A0A0G2K5D7	Specc1	Sperm antigen with calponin homology and coiled-coil domains 1 OS=Rattus norvegicus OX=10116 GN=Specc1 PE=1 SV=1	2	2	17	2	1	1153	127.5	7.69	49.1	2	0	2583205.606	1055378.922	960373.6197	2017735.004	1648473.111	1266390.416	963156.3227	80902.19488	344901.0655	2723842.255	2089339.224	2323520.038
A0A0G2K5E2	Scarf1	Scavenger receptor class F, member 1 OS=Rattus norvegicus OX=10116 GN=Scarf1 PE=4 SV=1	2	1	1	1	1	452	48.4	7.5	2.08	1	0	NA	NA	NA	NA	NA	NA	NA	NA	NA	NA	NA	NA
A0A0G2K5E4	Dnaja3	DnaJ heat shock protein family (Hsp40) member A3 OS=Rattus norvegicus OX=10116 GN=Dnaja3 PE=1 SV=1	14	5	28	5	1	480	52.4	9.28	55.17	5	0	2467244.915	4262914.625	6855482.724	9079218.312	6540843.718	4283712.343	5337042.061	5058762.673	1513409.535	2074580.635	7157477.108	3462769.391
A0A0G2K5F1	Macrod1	LRP16 protein OS=Rattus norvegicus OX=10116 GN=Macrod1 PE=1 SV=1	15	3	7	3	1	323	35.3	9.03	16.98	3	0	9283525.59	10605218.39	12593876.33	15752171.76	11004271.46	8597290.152	17166275.56	3989465.669	11099433.72	6932864.107	1271083.929	273495.1292
A0A0G2K5G6	Magt1	Magnesium transporter protein 1 OS=Rattus norvegicus OX=10116 GN=Magt1 PE=1 SV=1	14	5	54	5	1	368	41.6	10.05	128.15	5	0	23803046.85	23240818.5	22265392.65	20901899.8	24263309.35	23106000.71	20064481.34	66013613.22	28966615.88	22563733.83	33355221	35880495.36
A0A0G2K5I0	Flvcr2	Feline leukemia virus subgroup C receptor-related protein 2 OS=Rattus norvegicus OX=10116 GN=Flvcr2 PE=1 SV=1	8	3	19	3	1	547	59.7	6.1	41.48	3	0	195724.1962	1906308.219	2130353.27	1051334.759	1184768.685	1315456.701	NA	186139.8616	1356684.401	136392.8523	595765.0919	1204697.689
A0A0G2K5J0	Sult1c3	Sulfotransferase OS=Rattus norvegicus OX=10116 GN=Sult1c3 PE=1 SV=1	25	6	11	6	1	304	35.8	6.55	20.07	6	0	22757.88871	45613.2793	321901.8311	261565.8212	NA	NA	151651.2522	26065157.85	NA	59972.83248	181113.5544	580481.3371
A0A0G2K5K2	#N/A	Uncharacterized protein OS=Rattus norvegicus OX=10116 PE=4 SV=1	15	1	1	1	1	105	12.1	10.43	1.91	1	0	527784.1713	607998.125	445420.6279	680743.9245	984266.2815	603002.0842	NA	NA	NA	NA	493588.1597	1085496.961
A0A0G2K5K7	Inpp5k	Inositol polyphosphate-5-phosphatase K OS=Rattus norvegicus OX=10116 GN=Inpp5k PE=1 SV=1	14	5	16	5	1	451	52.4	5.81	30.71	5	0	3580136.286	2598843.188	1639870.256	598687.5752	3105694.31	911941.925	1981674.479	1758925.489	2302737.017	86187.66571	1085553.868	2707797.493
A0A0G2K5L1	Fat1	FAT atypical cadherin 1 OS=Rattus norvegicus OX=10116 GN=Fat1 PE=1 SV=1	1	3	3	3	1	4601	507	5.01	7.79	3	0	430700.5507	263723.5938	1038114.085	467369.4694	813982.9588	866999.6555	3414901.219	797483.3903	1029772.807	1159133.77	1799512.202	1164154.83
A0A0G2K5L2	Slc25a22	RCG47744, isoform CRA_c OS=Rattus norvegicus OX=10116 GN=LOC100911440 PE=1 SV=1	16	5	39	5	1	323	34.6	9.09	67.1	5	0	8258141.552	6212283.563	10728998.17	8928858.097	7458709.633	8653049.657	8269795.302	34753565.99	6454522.376	9576242.789	9471189.791	7811011.197
A0A0G2K5N6	Rock2	Rho-associated protein kinase OS=Rattus norvegicus OX=10116 GN=Rock2 PE=1 SV=1	32	40	320	33	1	1388	160.5	5.99	743.91	40	6	78230033.49	73376326.55	99109968.73	93681557.34	99238050.76	55839032.3	105854056.2	13669966.7	112359624.8	45299510.58	64763917.21	94064231.37
A0A0G2K5Q8	Clk2	Secretory carrier-associated membrane protein OS=Rattus norvegicus OX=10116 GN=Clk2 PE=1 SV=1	8	5	67	5	1	799	92.5	9.26	207.43	5	0	19300601.42	14264872.72	22283885.49	13144502.34	15419060.25	16189738.73	20673542.36	6092358.913	19160976.51	8580242.453	10838977.17	26464597.22
A0A0G2K5X3	#N/A	Uncharacterized protein OS=Rattus norvegicus OX=10116 PE=4 SV=1	11	1	1	1	1	120	13.3	6.52	1.7	1	0	NA	NA	602686.4415	NA	NA	NA	3563936.703	NA	NA	NA	NA	443130.3102
A0A0G2K5Y1	Vipas39	RCG20801, isoform CRA_c OS=Rattus norvegicus OX=10116 GN=Vipas39 PE=1 SV=1	4	1	2	1	1	491	56.8	7.14	5.85	1	0	NA	99785.35938	NA	182518.3995	237083.7392	NA	295366.7351	NA	370557.3146	426572.5608	NA	636349.2859
A0A0G2K607	Lilrb3a	Leukocyte immunoglobulin-like receptor subfamily B member 3-like OS=Rattus norvegicus OX=10116 GN=Lilrb3a PE=4 SV=1	4	2	4	2	1	840	93	6.81	10.2	2	0	NA	NA	NA	352288.7648	146631.8369	NA	321776.4453	NA	241706.6531	285930.9156	NA	655576.7255
A0A0G2K612	Smurf1	E3 ubiquitin-protein ligase OS=Rattus norvegicus OX=10116 GN=Smurf1 PE=4 SV=1	1	1	13	1	1	731	83.3	7.27	27.94	1	0	NA	NA	NA	NA	NA	NA	NA	NA	NA	NA	NA	NA
A0A0G2K613	#N/A	Uncharacterized protein OS=Rattus norvegicus OX=10116 PE=4 SV=1	14	2	34	2	1	199	19.8	4.69	105.28	2	0	8007574.561	3912792.25	8901183.58	7634361.125	7180980.606	6600292.133	9914746.34	3478308.689	10923257.24	5400305.948	2751520.866	8482110.264
A0A0G2K617	Rwdd4	RWD domain-containing protein 4 OS=Rattus norvegicus OX=10116 GN=Rwdd4 PE=1 SV=1	5	1	2	1	1	188	21.1	5.2	1.76	1	0	210091.1048	99766.90625	193362.0032	136704.0387	90578.20516	150187.212	179092.0556	399299.8217	461822.4416	161888.0014	395647.4695	645821.3729
A0A0G2K639	Pigr	Polymeric immunoglobulin receptor OS=Rattus norvegicus OX=10116 GN=Pigr PE=1 SV=1	26	18	231	18	1	782	86.9	6.39	636.23	18	0	76914405.36	67851256.75	47520745.74	49826095.31	71049560.21	67195695.13	26675967.85	55527992.41	17826906.27	45080449.25	35039327.09	22264544.67
A0A0G2K658	LOC102556347	Carbonyl reductase [NADPH] 1-like OS=Rattus norvegicus OX=10116 GN=LOC102556347 PE=1 SV=1	21	6	57	5	1	329	36.2	8.59	133.76	6	1	11073697.88	9803018.125	10840514.46	12779687.22	10416448.73	9777145.853	15258283.33	794065.1548	16210495.14	10216719.75	10760956.34	11891627.88
A0A0G2K676	Chia	Acidic mammalian chitinase OS=Rattus norvegicus OX=10116 GN=Chia PE=3 SV=1	15	6	20	6	1	510	56.1	5.21	38.45	6	0	6786558.33	5502640.383	4280700.277	8422739.999	8197924.346	6211129.82	2954332.161	1346309.235	3227984.617	10005943.35	8813832.662	2507521.467
A0A0G2K681	Clip1	CAP-Gly domain-containing linker protein 1 OS=Rattus norvegicus OX=10116 GN=Clip1 PE=1 SV=1	10	11	34	9	1	1416	159.4	5.16	81.6	11	1	2890706.065	8824142.969	3825931.766	4393785.85	6750152.291	1490010.957	6043400.337	2454045.995	3288075.187	2473490.221	3885424.988	4896398.8
A0A0G2K684	Cr2	Complement C3d receptor 2 OS=Rattus norvegicus OX=10116 GN=Cr2 PE=4 SV=1	1	1	1	1	1	1406	155.2	7.84	2.38	1	0	NA	165647.3906	61377.51034	89314.39487	NA	228097.5188	252075.9938	NA	NA	NA	NA	NA
A0A0G2K694	Ralbp1	RalA-binding protein 1 OS=Rattus norvegicus OX=10116 GN=Ralbp1 PE=1 SV=1	6	5	27	5	1	693	80	6.49	62.37	5	0	6338390.67	8549192.375	7414526.546	6109523.386	9440686.721	8196673.246	6781451.166	467109.6825	4468181.789	4394445.199	7704131.892	11844799.32
A0A0G2K695	Myof	Myoferlin OS=Rattus norvegicus OX=10116 GN=Myof PE=1 SV=1	49	85	1292	84	1	2061	234.5	6.09	3262.05	85	0	301182129.9	428206385.3	341350846.3	321015512.3	380523144.2	438909106.4	626394261	26239910.26	700001013.3	436900045.3	733909214.9	523930689
A0A0G2K6A9	Rufy3	Protein RUFY3 OS=Rattus norvegicus OX=10116 GN=Rufy3 PE=1 SV=1	8	5	16	4	1	637	72	5.35	28.61	5	0	1890922.704	2858173.5	4842099.526	4064476.154	4406629.3	4417123.765	3234154.717	3160515.459	3302851.86	3903360.329	4835245.939	2819798.352
A0A0G2K6B2	Triobp	RCG60109 OS=Rattus norvegicus OX=10116 GN=Triobp PE=1 SV=1	33	16	60	15	1	580	66.9	6.21	143.5	16	0	19215163.21	21025012.8	17143421.51	14721303.35	20429297.99	24056457.5	17259170.11	9427932.345	6837184.058	11717334.69	11670632.71	11222804.63
A0A0G2K6D5	Pitrm1	Pitrilysin metallopeptidase 1 OS=Rattus norvegicus OX=10116 GN=Pitrm1 PE=1 SV=1	18	14	53	14	1	1035	117.3	6.89	120.51	14	0	4036864.493	6002145.305	7861252.373	8819746.113	6109412.482	5716997.3	1832848.94	1531230.102	2249107.31	4351314.745	5179106.108	3474342.774
A0A0G2K6E3	Myo1g	Myosin IG OS=Rattus norvegicus OX=10116 GN=Myo1g PE=1 SV=1	31	24	147	23	1	1018	116.6	8.47	313.03	24	0	27244425.23	34492239.09	37821401.63	29158337.63	35090924.34	39950189.8	17827693.16	2359114.729	31107015.4	33907218.55	41237987.12	33524238.2
A0A0G2K6E5	Grk6	G protein-coupled receptor kinase OS=Rattus norvegicus OX=10116 GN=Grk6 PE=1 SV=1	3	2	4	1	1	589	67.1	8.65	6.93	2	0	NA	NA	NA	NA	NA	NA	NA	NA	NA	NA	NA	NA
A0A0G2K6E7	Adck5	AarF domain-containing kinase 5 OS=Rattus norvegicus OX=10116 GN=Adck5 PE=1 SV=1	5	3	7	3	1	649	73.8	8.69	17.49	3	0	1205135.064	2028371.375	2983024.22	1989307.57	1856929.753	2262284.832	428838.8	2660963.301	126618.3949	2186456.79	2727437.776	1287688.096
A0A0G2K6E8	Spag9	Sperm-associated antigen 9 OS=Rattus norvegicus OX=10116 GN=Spag9 PE=1 SV=1	15	14	62	14	1	1352	149.5	5.21	166.04	14	0	10349915.64	10714227	8687612.627	9903895.623	15792007.74	7353373.98	20047273.27	9123519.254	20489465.4	13823237.73	12897872.03	10931502.89
A0A0G2K6G2	Apmap	Adipocyte plasma membrane-associated protein OS=Rattus norvegicus OX=10116 GN=Apmap PE=1 SV=1	30	11	96	11	1	415	46.4	6.14	242.06	11	0	43127946.65	45543583.79	51222510	33312060.33	40180908.23	33436179.91	27566306.44	104287718.4	20178843.42	16482487.76	43218110.66	40583469.17
A0A0G2K6H8	Aph1a	Anterior pharynx defective 1a homolog (C. elegans), isoform CRA_a OS=Rattus norvegicus OX=10116 GN=Aph1a PE=1 SV=1	5	2	9	2	1	265	28.9	7.9	28.78	2	0	635944.2663	703562.4375	1077546.036	606477.0585	891115.1145	811350.9695	NA	282580.4833	692204.2132	715635.6297	961536.8771	1264797.237
A0A0G2K6L6	#N/A	Uncharacterized protein OS=Rattus norvegicus OX=10116 PE=3 SV=1	25	3	80	3	1	119	13.4	9.86	198.19	3	0	69169856.98	37455773.5	49946884.4	41655242.07	37955524.93	45495455.95	85164782.69	226202895.7	57148960.5	9477202.453	54084932.02	82223845.39
A0A0G2K6N9	Commd4	COMM domain containing 4 (Predicted), isoform CRA_c OS=Rattus norvegicus OX=10116 GN=Commd4 PE=1 SV=1	28	5	12	5	1	199	21.9	6.77	28.84	5	0	1662670.145	2273703.875	2968262.146	2379765.893	2839635.507	995026.9386	928709.0263	442583.8697	2650788.018	2144618.718	3132067.799	2465752.815
A0A0G2K6R8	Ehbp1l1	EH domain-binding protein 1-like 1 OS=Rattus norvegicus OX=10116 GN=Ehbp1l1 PE=1 SV=1	3	3	5	3	1	1699	182.4	4.82	10.32	3	0	249954.7498	313626.6484	179201.8532	29547.5209	165910.5397	40233.29283	153119.2139	45051.79499	377624.0331	NA	487992.9332	741706.1026
A0A0G2K6S9	Myh11	Myosin-11 OS=Rattus norvegicus OX=10116 GN=Myh11 PE=1 SV=1	48	96	1415	1	1	1979	227.9	5.49	3729.79	96	0	156411.3351	178762.3594	159534.5565	427268.8955	113734.4992	154246.355	423418.4323	115866.0109	1278744.647	852024.2569	927027.4642	659975.4034
A0A0G2K6T8	#N/A	Uncharacterized protein OS=Rattus norvegicus OX=10116 PE=4 SV=1	42	3	6	3	1	96	10.3	7.12	14.96	3	0	2320483.333	1913421.5	3752293.004	1502784.888	1219692.146	1515378.73	11168759.06	NA	7599676.329	10919896.56	2251690.73	8671366.784
A0A0G2K6T9	Pcdh1	Protocadherin 1 OS=Rattus norvegicus OX=10116 GN=Pcdh1 PE=1 SV=1	13	12	49	12	1	1191	128.7	5.12	120.24	12	0	11886592.12	8212344.063	9631131.973	10373597.7	12886333.5	6983949.446	12010592.45	6547269.123	9731763.844	3886441.06	3730201.717	8584055.025
A0A0G2K6U1	Nsf	Vesicle-fusing ATPase OS=Rattus norvegicus OX=10116 GN=Nsf PE=1 SV=1	35	26	315	22	1	744	82.6	6.95	726.15	26	4	82911782.72	79744907.9	128588993.7	117146590.3	136871350.5	85475994.4	90355540.44	57742589.08	100070870.8	84805208.31	97680380.06	133728800.1
A0A0G2K6X6	Mark2	Non-specific serine/threonine protein kinase OS=Rattus norvegicus OX=10116 GN=Mark2 PE=1 SV=1	5	3	8	2	1	731	82	9.69	20.26	3	0	1255467.167	842805.0625	816360.1075	893125.3937	NA	1024607.524	NA	1846514.633	NA	NA	791938.7425	NA
A0A0G2K6X9	Adk	Adenosine kinase OS=Rattus norvegicus OX=10116 GN=Adk PE=1 SV=1	32	10	48	10	1	403	44.1	6	125.08	10	0	11167977.05	14832668.16	10214883.22	11741512.44	14779018.95	13257286.58	11859787.84	26471654.15	13656105.41	15998395.97	15312839.01	9253392.775
A0A0G2K6Z6	Acp5	Tartrate-resistant acid phosphatase type 5 OS=Rattus norvegicus OX=10116 GN=Acp5 PE=1 SV=1	9	2	12	2	1	335	37.5	8.31	33.66	2	0	575298.9879	1018983.531	956104.3873	697467.4738	512892.5358	458912.8882	722991.6824	1161380.125	193975.2474	1790667.677	3055216.691	1367562.987
A0A0G2K712	Tbc1d5	TBC1 domain family, member 5 OS=Rattus norvegicus OX=10116 GN=Tbc1d5 PE=1 SV=1	6	3	13	3	1	827	93	6.54	32.38	3	0	984088.8694	634492.7891	72908.53726	140611.4447	852928.4418	322526.1956	908995.656	NA	504146.7017	22471.97459	NA	508162.5198
A0A0G2K713	Hao2	Hydroxyacid oxidase 2 OS=Rattus norvegicus OX=10116 GN=Hao2 PE=1 SV=1	10	3	4	3	1	396	43.8	6.7	11.6	3	0	208021.6227	562598.5625	NA	NA	95731.12545	102790.1566	NA	5800531.419	799924.1951	208967.2501	NA	474252.5576
A0A0G2K714	Sh3glb1	Endophilin-B1 OS=Rattus norvegicus OX=10116 GN=Sh3glb1 PE=1 SV=1	28	10	82	9	1	384	43.1	6.71	192.67	10	1	36930614.98	28197283.94	18178899.59	22411872.47	38210351.2	24196405.3	36986239.83	7378480.745	25993376.26	8974833.979	13491338.39	30478551.44
A0A0G2K719	Ddx3x	DEAD-box helicase 3, X-linked OS=Rattus norvegicus OX=10116 GN=Ddx3x PE=1 SV=1	40	23	322	3	1	662	73.1	7.18	730.1	23	0	9491620.066	3964549.125	3910640.06	2451865.73	3399254.877	3398472.147	22702525	18143306.85	14048012.49	5701374.558	9356069.782	16321742.4
A0A0G2K735	Uba7	Ubiquitin-like modifier-activating enzyme 7 OS=Rattus norvegicus OX=10116 GN=Uba7 PE=1 SV=1	2	1	2	1	1	989	109.8	5.69	4.49	1	0	300223.3332	363006.2813	290713.9357	258539.6337	541881.8117	325812.8015	652856.6348	424167.8708	854921.7109	NA	NA	NA
A0A0G2K737	Txnl1	Thioredoxin-like protein 1 OS=Rattus norvegicus OX=10116 GN=Txnl1 PE=1 SV=1	30	7	27	7	1	292	32.7	5.07	50.66	7	0	3280556.04	4946495.688	3196947.381	5538901.793	3818566.828	4191961.663	3534960.344	1852378.365	7080434.815	5193565.307	3833439.698	4242723.374
A0A0G2K742	Col4a4	Collagen type IV alpha 4 chain OS=Rattus norvegicus OX=10116 GN=Col4a4 PE=4 SV=1	1	1	6	1	1	1682	163.9	8.43	7.99	1	0	1060088.854	1233210	1029095.24	1662913.654	2010083.752	1855917.101	1453892.058	NA	667500.3229	2873743.343	1178461.166	1032741.471
A0A0G2K743	RGD1562415	40S ribosomal protein S26 OS=Rattus norvegicus OX=10116 GN=RGD1562415 PE=3 SV=1	44	4	35	4	1	115	12.8	9.86	86.61	4	0	70715682.8	22880206.75	33195780.51	22924723.02	20138557.11	37780440.31	41712073.66	144375204.3	43223300.6	13984077.99	27423716.99	47123460.02
A0A0G2K751	Dnajc8	DnaJ homolog subfamily C member 8 OS=Rattus norvegicus OX=10116 GN=Dnajc8 PE=1 SV=1	4	1	1	1	1	277	32.7	8.76	3.62	1	0	NA	NA	1063448.822	NA	NA	NA	1181537.88	1055985.111	NA	NA	NA	NA
A0A0G2K756	Acbd3	Acyl-Coenzyme A binding domain containing 3 OS=Rattus norvegicus OX=10116 GN=Acbd3 PE=1 SV=1	25	10	43	10	1	526	60.3	5.01	102.95	10	0	25951546.33	15087838.91	25367495.58	30405503.12	15686303.78	17582637.94	26598801.16	9169377.248	17363973.58	20188717.36	13838842.72	18435371.4
A0A0G2K761	Cul2	Cullin 2 OS=Rattus norvegicus OX=10116 GN=Cul2 PE=1 SV=1	8	5	6	5	1	745	86.9	7.12	12.61	5	0	1926853.547	959864.2969	2135475.677	967488.4239	1165757.313	1697546.27	1692418.963	8252508.819	2589759.113	705684.4466	1472243.831	3617712.917
A0A0G2K770	Zfyve26	Zinc finger FYVE domain-containing protein 26 OS=Rattus norvegicus OX=10116 GN=Zfyve26 PE=1 SV=1	2	3	12	3	1	2542	284	6.24	33.73	3	0	526287.9088	199576.9531	348181.8923	268124.0504	NA	286684.8478	NA	252482.6085	233855.5939	132448.9888	887137.055	780622.4493
A0A0G2K777	Rhot1	Ras homolog family member T1 OS=Rattus norvegicus OX=10116 GN=Rhot1 PE=1 SV=1	19	11	116	9	1	752	86	6.79	269.21	11	2	13111596.06	16619280.63	23283183.78	27535392.99	22442328.47	14569806.04	11159065.24	5825060.229	6883066.833	12609911.75	21981421.4	20482329.38
A0A0G2K781	Ppfibp1	PPFIA-binding protein 1 OS=Rattus norvegicus OX=10116 GN=Ppfibp1 PE=1 SV=1	7	6	35	4	1	1032	116	5.71	72.42	6	0	40809910.77	69953456.55	332097979.8	246385693.6	92151267.89	256159633	14930826.21	1928697.155	22662970	196904989.4	56254634.29	32557442.02
A0A0G2K785	Gk	Glycerol kinase OS=Rattus norvegicus OX=10116 GN=Gk PE=1 SV=1	17	7	17	7	1	559	61.2	5.9	43.54	7	0	947817.7119	1688834.344	2118794.342	1946434.742	1574847.611	1671779.49	2813504.612	9700491.94	3175352.475	3220352.091	3437730.494	2597958.058
A0A0G2K7B6	Dysf	Dysferlin OS=Rattus norvegicus OX=10116 GN=Dysf PE=1 SV=1	17	30	138	29	1	2134	242.3	5.8	329.09	30	0	15839835.76	17090703.9	16652324.98	14359719.36	15822816.66	17642033.1	16278131.77	5388214.237	16469118.75	13790416.15	18127412.77	26611385.37
A0A0G2K7C4	Csnk1g1	Casein kinase I isoform gamma-1 OS=Rattus norvegicus OX=10116 GN=Csnk1g1 PE=1 SV=1	12	4	11	2	1	427	49.2	9.09	19.52	4	0	334065.6823	495763.0938	344449.6157	342627.3762	784994.188	369498.6086	120298.9004	124661.3774	474699.9719	NA	451466.7847	491654.7648
A0A0G2K7E5	Cacna2d1	Voltage-dependent calcium channel subunit alpha-2/delta-1 OS=Rattus norvegicus OX=10116 GN=Cacna2d1 PE=1 SV=1	19	16	76	16	1	1084	122.7	5.2	174.88	16	0	14146255.52	21915738.86	19627446.43	16159535.09	16606928.67	15796272.92	18354681.16	1715248.361	14145000.99	11908122.36	12336065.65	19432251.25
A0A0G2K7G2	Agfg2	ArfGAP with FG repeats 2 OS=Rattus norvegicus OX=10116 GN=Agfg2 PE=1 SV=1	4	1	1	1	1	488	50.1	8.95	0	1	0	NA	NA	NA	NA	NA	NA	NA	NA	NA	NA	NA	NA
A0A0G2K7G7	8-Sep	Septin-8 OS=Rattus norvegicus OX=10116 GN=Sept8 PE=1 SV=1	36	13	211	9	1	483	55.8	6.1	480.94	13	0	23720638.99	24387236.03	21740314.53	22404417.43	23093723.78	19608090.69	29394180.63	860346.1816	27406712.72	21899536.78	23598684.87	28167492.98
A0A0G2K7I1	#N/A	Uncharacterized protein OS=Rattus norvegicus OX=10116 PE=1 SV=1	35	2	5	2	1	96	10.1	4.73	14.63	2	0	NA	NA	NA	NA	275274.3187	NA	363693.279	NA	852626.2836	292897.3687	277257.8739	431862.8217
A0A0G2K7I4	Rcsd1	RCSD domain containing 1 (Predicted), isoform CRA_a OS=Rattus norvegicus OX=10116 GN=Rcsd1 PE=1 SV=1	9	3	16	3	1	412	43.8	5	46.49	3	0	1821836.125	1046562.785	1343073.287	1811317.942	1972513.817	2035741.838	3155935.364	NA	1017954.81	NA	225941.336	926759.6279
A0A0G2K7M4	Apobr	Apolipoprotein B receptor OS=Rattus norvegicus OX=10116 GN=Apobr PE=1 SV=1	1	1	3	1	1	1016	111	4.44	6.51	1	0	289475.6145	341750.75	NA	NA	153573.734	365814.0516	NA	69648.61515	345673.0645	843054.0573	658719.6475	502192.3454
A0A0G2K7N9	Arhgap5	Rho GTPase-activating protein 5 OS=Rattus norvegicus OX=10116 GN=Arhgap5 PE=1 SV=1	1	1	4	1	1	1503	172.2	6.6	9.92	1	0	225247.8719	366577.4375	326700.3185	281671.8111	666129.8551	NA	635802.8	267735.6976	NA	460873.0444	NA	NA
A0A0G2K7S6	Wdr44	WD repeat-containing protein 44 OS=Rattus norvegicus OX=10116 GN=Wdr44 PE=1 SV=1	1	1	8	1	1	915	101.5	5.66	20.41	1	0	2205575.114	1322231.875	1514845.268	NA	1093085.765	1494168.932	1734876.944	NA	2304146.908	537470.7005	1324755.401	1877658.075
A0A0G2K7T2	Gne	Bifunctional UDP-N-acetylglucosamine 2-epimerase/N-acetylmannosamine kinase OS=Rattus norvegicus OX=10116 GN=Gne PE=1 SV=1	32	19	41	19	1	753	82.9	7.05	94.64	19	0	781785.4379	399290.7969	654513.0627	544637.0742	1101438.093	707837.1631	6832260.719	86692811.64	8346696.216	22046378.29	4110988.492	6080324.971
A0A0G2K7T6	Nup155	Nuclear pore complex protein Nup155 OS=Rattus norvegicus OX=10116 GN=Nup155 PE=1 SV=1	1	1	1	1	1	1390	155	6.18	2.62	1	0	NA	NA	NA	NA	NA	NA	NA	NA	NA	NA	NA	NA
A0A0G2K7W4	Map4k4	Mitogen-activated protein kinase kinase kinase kinase 4 OS=Rattus norvegicus OX=10116 GN=Map4k4 PE=1 SV=1	9	8	65	5	1	1348	153.1	7.52	174.72	8	0	4171648.42	2944884.156	2687681.872	3248636.427	2983879.589	3595429.21	7302442.72	NA	2827471.742	2315810.307	1252110.839	1826196.267
A0A0G2K7X2	Traf3	Tnf receptor-associated factor 3 OS=Rattus norvegicus OX=10116 GN=Traf3 PE=4 SV=1	2	1	1	1	1	610	69.2	8.09	2.36	1	0	308890.7707	383884.8438	230985.4981	NA	NA	NA	323972.5893	NA	442523.1595	308765.914	340330.9387	214517.6391
A0A0G2K7X7	C7	Complement C7 OS=Rattus norvegicus OX=10116 GN=C7 PE=1 SV=1	30	20	166	20	1	846	93.6	7.25	379.12	20	0	19786747.81	20098608.63	19803951.25	18807341.38	23065482.2	16415909.8	27456577.89	4329188.506	50422449.43	94094380.39	59784452	51854860.61
A0A0G2K7Y2	Oxr1	Oxidation resistance protein 1 OS=Rattus norvegicus OX=10116 GN=Oxr1 PE=1 SV=1	2	1	1	1	1	873	97	5.34	2.49	1	0	NA	NA	NA	NA	NA	NA	NA	1047707.538	NA	NA	NA	358388.0116
A0A0G2K808	Asap2	ArfGAP with SH3 domain, ankyrin repeat and PH domain 2 OS=Rattus norvegicus OX=10116 GN=Asap2 PE=1 SV=1	2	2	3	1	1	844	94.3	7.01	5.7	2	0	781402.5226	856919.3125	942520.2069	717317.8746	898983.0862	147742.9273	835945.1966	246350.4868	461683.8747	276635.1589	815295.0939	1051660.903
A0A0G2K828	#N/A	Uncharacterized protein OS=Rattus norvegicus OX=10116 PE=4 SV=1	13	1	1	1	1	119	13.2	8.48	2.95	1	0	272899.1801	322553.3125	NA	686008.2838	124815.762	NA	166175.706	NA	1475002.557	238817.971	NA	NA
A0A0G2K847	Agap1	ArfGAP with GTPase domain, ankyrin repeat and PH domain 1 OS=Rattus norvegicus OX=10116 GN=Agap1 PE=4 SV=1	3	1	1	1	1	889	97.4	8.6	2.03	1	0	NA	769515.1875	NA	1717579.397	993024.7801	1132397.087	NA	NA	504920.2387	6517001.267	1797528.7	NA
A0A0G2K860	Arhgef12	Rho guanine nucleotide exchange factor 12 OS=Rattus norvegicus OX=10116 GN=Arhgef12 PE=1 SV=1	22	27	121	27	1	1532	171.5	5.99	280.44	27	0	28962460.24	31796444.43	28672606.32	26078555.76	30655145.03	27806285.61	33118639.32	12440853.11	28053995.24	21939256.95	22204305.5	30288468.35
A0A0G2K865	Tpd52	Tumor protein D52 OS=Rattus norvegicus OX=10116 GN=Tpd52 PE=1 SV=1	27	7	51	7	1	247	26.9	4.96	121.78	7	0	6698667.71	4098021.059	5843499.571	7256433.599	6497731.501	4218135.547	13799666.8	3549175.986	17108636.45	5996169.205	5795166.851	4273870.002
A0A0G2K872	Cadm3	Cell adhesion molecule 3 OS=Rattus norvegicus OX=10116 GN=Cadm3 PE=1 SV=1	6	2	5	2	1	430	46.6	5.21	3.28	2	0	359703.8403	279033.9375	814694.1685	596183.4645	NA	544097.7175	408970.9447	NA	2351172.599	1629499.246	1512453.31	1559025.444
A0A0G2K896	RGD1310507	Similar to RIKEN cDNA 1300017J02 OS=Rattus norvegicus OX=10116 GN=RGD1310507 PE=1 SV=1	55	33	378	32	1	700	76.7	6.96	942.61	33	0	38329136.8	31217313.57	25585874.87	35178654.2	30246819.09	30124883.32	73705825.41	41974777.42	92937055.78	199796783.4	108361918.4	97014127.56
A0A0G2K8A9	#N/A	Uncharacterized protein OS=Rattus norvegicus OX=10116 PE=1 SV=1	6	1	6	1	1	213	23.8	4.56	6.27	1	0	51112.3823	77965.71875	20559.448	36791.8424	NA	16739.60212	530496.8809	759026.3287	130469.3064	138101.0623	361414.7092	422617.8173
A0A0G2K8C7	Mtmr3	Myotubularin-related protein 3 OS=Rattus norvegicus OX=10116 GN=Mtmr3 PE=1 SV=1	1	1	3	1	1	1207	135	5.91	2.06	1	0	NA	95047.25781	87888.99444	105547.8251	129318.8388	50336.53445	NA	NA	224940.8686	184279.5077	NA	129626.4866
A0A0G2K8D1	Mospd2	Motile sperm domain-containing 2 OS=Rattus norvegicus OX=10116 GN=Mospd2 PE=1 SV=1	17	8	30	8	1	518	59.7	5.85	60.94	8	0	16443925.52	17487575	24048845.59	18927461.56	17619245.44	18680434.83	8386723.673	6222024.422	14689846.18	20613731.83	12137044.58	11058208.44
A0A0G2K8D6	Dcun1d1	DCN1-like protein OS=Rattus norvegicus OX=10116 GN=Dcun1d1 PE=1 SV=1	15	3	4	3	1	273	31.6	5.48	10.54	3	0	1252517.104	901619.25	NA	NA	NA	740882.5326	1595228.306	2343433.599	1351741.093	684828.7953	60169.66673	349492.3921
A0A0G2K8E7	Gdpd1	Lysophospholipase D GDPD1 OS=Rattus norvegicus OX=10116 GN=Gdpd1 PE=1 SV=1	8	2	4	2	1	315	35.9	8.16	11.85	2	0	615244.2196	1174146.5	771222.1512	637486.37	821835.7414	853776.6831	NA	NA	196856.7579	257511.689	NA	NA
A0A0G2K8H0	Caprin1	Caprin-1 OS=Rattus norvegicus OX=10116 GN=Caprin1 PE=1 SV=1	16	9	67	9	1	720	79.6	5.3	145.46	9	0	31506116.58	11172744.25	17202750.64	13929993.4	15685069.69	7367855.019	49322821.32	35534957.63	26329904.43	11324670.3	32928522.34	38413617.31
A0A0G2K8H6	Ctsh	Pro-cathepsin H OS=Rattus norvegicus OX=10116 GN=Ctsh PE=1 SV=1	19	4	34	4	1	370	42	8.62	78.55	4	0	10709543.08	9098280.688	11267307.85	14091485.27	11201606.68	12333004.48	4390437.872	5428010.318	4697655.108	16600952.04	9807235.547	4406148.625
A0A0G2K8K3	Serpind1	Heparin cofactor 2 OS=Rattus norvegicus OX=10116 GN=Serpind1 PE=1 SV=1	12	6	41	6	1	511	58	6.73	56.86	6	0	2711275.53	2421070.648	1295334.271	1063106.005	3621457.281	1981219.483	4851648.417	8334993.591	9574126.444	10004589.68	10768401.68	9758237.027
A0A0G2K8M2	Rsph1	Radial spoke head component 1 OS=Rattus norvegicus OX=10116 GN=Rsph1 PE=4 SV=1	13	3	5	3	1	316	35.4	5.06	13.28	3	0	715177.7084	464912.5625	874034.14	NA	NA	1444288.951	1621687.513	NA	1004041.892	563852.7119	583726.2809	504289.8801
A0A0G2K8N1	Obscn	Obscurin, cytoskeletal calmodulin and titin-interacting RhoGEF OS=Rattus norvegicus OX=10116 GN=Obscn PE=1 SV=1	0	1	1	1	1	8031	874.2	6.01	2.38	1	0	NA	NA	NA	NA	NA	NA	NA	NA	NA	NA	NA	NA
A0A0G2K8N6	Ankmy2	Ankyrin repeat and MYND domain-containing 2 OS=Rattus norvegicus OX=10116 GN=Ankmy2 PE=1 SV=1	4	1	6	1	1	436	48.3	6.42	11.49	1	0	22656.40425	66069.19531	NA	NA	142965.5615	NA	116857.5836	60041.30724	95099.12136	NA	166259.56	358982.02
A0A0G2K8N9	Nek9	NIMA-related kinase 9 OS=Rattus norvegicus OX=10116 GN=Nek9 PE=1 SV=1	21	13	49	13	1	958	104.8	6.19	123.33	13	0	13630632.89	18713078.42	14652139.77	20396896.16	20357217.79	27951703.44	31166923.51	2333392.08	13585922.95	5262174.218	34381160.26	15939360.06
A0A0G2K8P3	Nedd4	E3 ubiquitin-protein ligase OS=Rattus norvegicus OX=10116 GN=Nedd4 PE=1 SV=1	31	21	152	21	1	889	102.7	5.24	315.82	21	0	16270249.99	18110156.82	19809728.99	17885134.08	19741004.89	20114412.08	39894739.14	16144465.4	55799500.51	33151779.09	29275538.24	42212848.92
A0A0G2K8Q1	Apoc3	Apolipoprotein C-III OS=Rattus norvegicus OX=10116 GN=Apoc3 PE=1 SV=1	19	1	31	1	1	100	11	4.77	95.21	1	0	2110081.989	2152939.375	813006.34	563988.8992	NA	370311.4966	16154648.71	5894128.584	3435900.244	9636078.349	10802346.75	27553220.59
A0A0G2K8R3	Lmo7	LIM domain 7 OS=Rattus norvegicus OX=10116 GN=Lmo7 PE=1 SV=1	31	38	315	38	1	1729	195.6	6.6	832.13	38	0	100282072.9	136901145.6	138267063.8	131472485.4	114867208.1	108000220.7	121656000.6	5560515.56	64978871.11	111866218.3	81404963.08	79756758
A0A0G2K8S1	Slc12a7	Solute carrier family 12 member 7 OS=Rattus norvegicus OX=10116 GN=Slc12a7 PE=1 SV=1	4	3	7	3	1	1088	119.9	6.51	14.19	3	0	489477.5322	211282.0449	237303.0852	NA	47569.78128	NA	263950.2764	635994.7961	629607.3673	310969.6133	675349.5324	71303.35102
A0A0G2K8S6	LOC103692171	Glucosidase 1 OS=Rattus norvegicus OX=10116 GN=LOC103692171 PE=1 SV=1	33	22	301	22	1	834	91.9	9.11	660.03	22	0	80391744.5	85451710.5	108549671.5	92043056.12	97599792.95	101372759.5	47746059.71	162610661.1	44186165.91	57082982.12	97870200	81719744.27
A0A0G2K8T0	Asah1	Acid ceramidase OS=Rattus norvegicus OX=10116 GN=Asah1 PE=1 SV=1	31	12	141	12	1	428	48.3	9.17	309.92	12	0	69016422.04	90429712.32	88504536.1	95182698.89	99939727.5	104470999.9	30438482.56	31961710.2	47128079.79	67817205.69	75554169.04	53511014.76
A0A0G2K8V1	Atp11a	Phospholipid-transporting ATPase OS=Rattus norvegicus OX=10116 GN=Atp11a PE=1 SV=1	25	25	153	21	1	1142	130.9	6.58	366.12	25	4	35772280.39	38637147.94	58091467.05	53982713.5	39445186.16	36660099.22	23771735.89	27945477.83	39827311.25	50775845.85	53468814.75	38604070.9
A0A0G2K8V2	Vcl	Vinculin OS=Rattus norvegicus OX=10116 GN=Vcl PE=1 SV=1	62	67	1022	67	1	1134	123.5	5.71	2563.96	67	0	539673430.1	662794884.1	388693371.2	423929539.4	895339542.2	667150577.1	561578876.3	84813477.46	504973566.5	414801684.6	519019606.9	453587277.2
A0A0G2K8V3	Thoc2	THO complex 2 OS=Rattus norvegicus OX=10116 GN=Thoc2 PE=1 SV=1	1	1	1	1	1	1613	184.9	8.41	1.98	1	0	16753.7524	32156.39453	NA	21620.53169	18198.29019	NA	46636.10658	NA	36286.48201	117074.4095	51111.0048	40694.30568
A0A0G2K8V5	Crp	C-reactive protein OS=Rattus norvegicus OX=10116 GN=Crp PE=1 SV=1	2	2	28	2	1	1017	116.4	9.25	55.17	2	0	3882946.905	2420914.5	2272223.809	3092213.98	4155520.865	2401229.153	26596157.6	20362718.35	15649138.81	15165506.93	14667460.19	14647674.69
A0A0G2K8W9	Sptbn1	Spectrin beta chain OS=Rattus norvegicus OX=10116 GN=Sptbn1 PE=1 SV=1	63	125	2407	114	1	2358	273.3	5.64	6363.77	125	11	1244457144	1845925844	1397745625	1299828521	1673192416	1795449575	1033904421	127360724.3	807453584.3	1473621173	1266217955	1089727166
A0A0G2K8X3	Pid1	Phosphotyrosine interaction domain-containing 1 OS=Rattus norvegicus OX=10116 GN=Pid1 PE=1 SV=1	10	2	8	2	1	217	24.8	6.99	18.17	2	0	517841.0299	379338.0625	235929.9495	168334.0423	397093.3171	195609.0545	306048.7732	302495.0147	178098.7093	NA	179529.6784	479724.1113
A0A0G2K8Z9	Kif13b	Kinesin family member 13B OS=Rattus norvegicus OX=10116 GN=Kif13b PE=1 SV=1	12	19	95	17	1	1843	204.7	5.8	236.39	19	2	26769128.97	13495156.46	17797419.94	19342352.3	16958707.88	18479896.28	39185097.94	17572619.29	28779769.07	11770614.61	24718306.07	34387208.92
A0A0G2K916	Ankhd1	Eukaryotic translation initiation factor 4E-binding protein 3 OS=Rattus norvegicus OX=10116 GN=Ankhd1 PE=1 SV=1	5	8	18	3	1	2615	276.7	6.05	46.36	8	2	1163910.114	1229994.117	699675.6477	426389.5704	900493.1123	598909.9516	6532468.058	1761485.633	6030204.223	8262606.222	4899069.677	11280642.38
A0A0G2K926	LOC297568	Murinoglobulin-1 OS=Rattus norvegicus OX=10116 GN=LOC297568 PE=1 SV=1	40	51	1207	2	1	1477	163.6	6.01	3264.88	51	52	363677400.8	292752984.1	151218533.3	205624626.5	372717971.8	191942871.9	824782013.9	967305027.2	678135132.5	1076077241	883734605	873312691.3
A0A0G2K946	Spock2	SPARC/osteonectin, cwcv and kazal-like domains proteoglycan 2 OS=Rattus norvegicus OX=10116 GN=Spock2 PE=1 SV=1	8	3	12	3	1	425	47	4.87	14.64	3	0	1180079.863	2785799.438	2031302.732	1722652.258	2967990.61	1720315.902	2313509.784	NA	895885.0629	1633709.333	1441858.814	1892498.745
A0A0G2K950	Papss2	3'-phosphoadenosine 5'-phosphosulfate synthase 2 OS=Rattus norvegicus OX=10116 GN=Papss2 PE=1 SV=1	28	14	28	13	1	619	69.9	7.42	67.76	14	1	1502582.5	968081.6094	7088442.254	4918154.723	1657158.679	5469924.679	4928022.14	56281650.27	7296801.689	6117470.526	4717813.455	10501241.91
A0A0G2K977	Golga2	Golgin subfamily A member 2 OS=Rattus norvegicus OX=10116 GN=Golga2 PE=1 SV=1	9	8	51	8	1	1026	115.9	4.97	128.79	8	0	3559566.861	2134873.258	2063839.64	1827860.245	2064756.805	2251394.74	13857589.81	5446131.43	9978594.532	9316233.91	7477563.539	14825004.25
A0A0G2K995	Fblim1	Filamin binding LIM protein 1, isoform CRA_a OS=Rattus norvegicus OX=10116 GN=Fblim1 PE=4 SV=1	31	8	48	8	1	376	41.5	6.19	130.92	8	0	2309440.559	3401373.227	4054740.345	2755825.678	4190627.739	4597673.271	10868023.01	876708.0453	37056074.77	14169093.15	10456690.67	9876242.676
A0A0G2K9A2	Arpc2	Arp2/3 complex 34 kDa subunit OS=Rattus norvegicus OX=10116 GN=Arpc2 PE=1 SV=1	35	12	248	12	1	300	34.3	7.36	569.53	12	0	79755017.54	76318174.34	56223046.06	63138941.13	81161818.28	65318677.7	88561683.36	81991002.48	145082308.2	98786207.45	135906197.3	117812250.1
A0A0G2K9B1	LOC299282	Serine protease inhibitor A3N OS=Rattus norvegicus OX=10116 GN=LOC299282 PE=1 SV=1	41	18	226	18	1	432	48.3	5.57	568.27	18	0	33553633.37	39168547.06	16308066.17	8283080.675	38682625.23	12821396.78	86772050.19	115438830.1	163764285.6	365225687.4	168527370.5	85681269.26
A0A0G2K9D7	Pcdhgc3	Protocadherin gamma subfamily C, 3 OS=Rattus norvegicus OX=10116 GN=Pcdhgc3 PE=4 SV=1	5	3	6	3	1	934	101.1	5.19	15.56	3	0	425605.5435	766561.9219	418561.6279	659625.2176	590000.1231	137174.5991	1184579.423	293345.1062	479731.0374	150910.8082	491921.8602	546725.6602
A0A0G2K9E0	Rnh1	Ribonuclease inhibitor OS=Rattus norvegicus OX=10116 GN=Rnh1 PE=1 SV=1	53	17	159	17	1	492	54.1	4.98	417.47	17	0	19515827.22	25673929.67	21143775.18	22439129.42	26838249.47	16612514.63	40075739.98	12364106.1	36065856.97	34178904.72	31777488.28	22204827.58
A0A0G2K9E1	Zfyve21	Zinc finger FYVE domain-containing protein 21 OS=Rattus norvegicus OX=10116 GN=Zfyve21 PE=1 SV=1	4	1	8	1	1	252	27.9	7.84	18.09	1	0	2319333.199	1174478.5	1687085.629	2722775.782	2263554.086	2053615.227	4492731.768	1709255.099	2844874.534	NA	2238250.321	2551717.487
A0A0G2K9F0	Kat7	Histone acetyltransferase OS=Rattus norvegicus OX=10116 GN=Kat7 PE=1 SV=1	3	1	1	1	1	612	70.7	8.98	0	1	0	56643.0304	NA	NA	65044.44379	NA	NA	NA	NA	NA	1153666.395	NA	61941.9288
A0A0G2K9F2	Nemf	Uncharacterized protein OS=Rattus norvegicus OX=10116 PE=1 SV=1	5	4	20	4	1	781	89.5	5.97	43.95	4	0	1232391.89	2626172.719	710232.4054	1097581.551	2684909.227	NA	9466336.599	12519578.02	5142235.394	2755185.282	5366802.921	6513018.278
A0A0G2K9I6	Cp	Ceruloplasmin OS=Rattus norvegicus OX=10116 GN=Cp PE=1 SV=1	40	39	666	39	1	1084	123.6	5.68	1636.3	39	0	142087684.6	216258904	148046855	143105934.7	159444069.4	179348430.4	324083199.3	136523480.2	662900661	382205334	354766359.4	386016763.4
A0A0G2K9I8	LOC100361025	Protein arginine methyltransferase 1-like OS=Rattus norvegicus OX=10116 GN=LOC100361025 PE=3 SV=1	24	7	43	7	1	353	40.5	5.59	99	7	0	4143135.183	5014720.031	2606797.262	3189694.306	6093525.718	3436138.141	2630459.376	4110746.973	10605670.44	5916603.304	4552632.476	3639069.21
A0A0G2K9J0	Tanc2	Tetratricopeptide repeat, ankyrin repeat and coiled-coil-containing 2 OS=Rattus norvegicus OX=10116 GN=Tanc2 PE=1 SV=1	0	1	8	1	1	2076	228.9	8.19	7.34	1	0	NA	NA	NA	NA	NA	NA	NA	NA	NA	NA	NA	NA
A0A0G2K9J2	Atp6v1h	V-type proton ATPase subunit H OS=Rattus norvegicus OX=10116 GN=Atp6v1h PE=1 SV=1	12	4	33	4	1	483	55.8	6.61	97.39	4	0	3811546.109	3080517.875	5995185.353	5027561.625	3576051.824	4791581.4	2988295.388	1429163.402	5934423.181	8992415.15	4393201.514	3922591.431
A0A0G2K9K2	Tacc1	Transforming, acidic coiled-coil-containing protein 1 OS=Rattus norvegicus OX=10116 GN=Tacc1 PE=1 SV=1	2	1	1	1	1	784	85.6	5.02	2.78	1	0	1090351.516	NA	865916.3807	745360.0048	665019.3402	605642.9882	1180631.451	NA	1319347.049	835423.3783	1356142.418	2276234.713
A0A0G2K9L2	Tom1l2	Target of myb1-like 2 membrane-trafficking protein OS=Rattus norvegicus OX=10116 GN=Tom1l2 PE=1 SV=1	5	2	17	2	1	528	57.9	4.82	35.03	2	0	1313926.356	1434223.656	1139923.152	1348793.573	1472657.64	1061082.089	758931.5862	413737.0217	953776.4116	980872.5028	869998.9097	1047242.995
A0A0G2K9L6	Rbck1	Protein kinase C-binding protein Beta15, isoform CRA_a OS=Rattus norvegicus OX=10116 GN=Rbck1 PE=1 SV=1	5	2	13	2	1	508	57.6	6.19	28.06	2	0	NA	437266.9688	863655.4058	NA	1210225.422	746173.3182	2479902.521	498650.0941	4899894.964	1371366.176	467391.2213	3676236.18
A0A0G2K9M4	Wdfy3	WD repeat and FYVE domain-containing 3 OS=Rattus norvegicus OX=10116 GN=Wdfy3 PE=1 SV=1	4	9	49	9	1	3506	391.3	6.84	82.82	9	0	3236982.642	1165206.488	1422395.439	1311307.418	2010723.357	1371672.893	2780704.155	1092426.593	3046572.086	2684015.725	2544360.367	4581197.115
A0A0G2K9P5	Cog5	Component of oligomeric golgi complex 5 OS=Rattus norvegicus OX=10116 GN=Cog5 PE=1 SV=1	9	4	19	4	1	756	83.6	6.55	37.91	4	0	24589.12428	57831.49609	2107872.425	34303.05681	1828292.712	1566754.569	3101708.918	1500052.926	3123121.298	1408655.213	2325658.229	3321293.256
A0A0G2K9Q3	Naa25	N-alpha-acetyltransferase 25, NatB auxiliary subunit OS=Rattus norvegicus OX=10116 GN=Naa25 PE=1 SV=1	2	2	3	2	1	972	111.7	6.61	7.01	2	0	352418.1909	202285.1719	NA	NA	419720.9428	403919.9142	149032.7557	NA	395669.7157	NA	278397.1273	NA
A0A0G2K9Q9	Krt17	Keratin, type I cytoskeletal 17 OS=Rattus norvegicus OX=10116 GN=Krt17 PE=1 SV=1	20	11	124	3	1	447	49.5	5.11	270.19	11	1	NA	982794.1719	312195.7789	679166.1829	NA	2651626.031	NA	646023.0952	1211106.624	3250462.497	4577519.642	1350882.34
A0A0G2K9T1	Itch	E3 ubiquitin-protein ligase OS=Rattus norvegicus OX=10116 GN=Itch PE=1 SV=1	5	3	11	3	1	882	100.8	6.34	25.55	3	0	607855.5405	679432.1016	199355.6926	493076.1381	127031.3949	605740.676	NA	6012552.91	NA	164391.5801	1429457.935	785459.3819
A0A0G2K9T4	Macf1	Microtubule-actin cross-linking factor 1 OS=Rattus norvegicus OX=10116 GN=Macf1 PE=1 SV=1	28	159	1087	31	1	7384	834.6	5.38	2695.08	159	123	129586568.8	159626618.7	161776582.9	133060666.1	155329483.2	169362462.9	197593993.6	31045189.48	165134224	246130800.5	201931827.1	186166172.9
A0A0G2K9U6	Atg16l1	Autophagy-related 16-like 1 OS=Rattus norvegicus OX=10116 GN=Atg16l1 PE=1 SV=1	6	2	2	2	1	623	69.6	6.32	2.68	2	0	NA	NA	NA	NA	NA	NA	226527.603	93839.35752	438326.7437	NA	NA	201472.4308
A0A0G2K9V4	Cyth3	Cytohesin-3 OS=Rattus norvegicus OX=10116 GN=Cyth3 PE=4 SV=1	11	5	25	5	1	471	54.8	6.43	30.98	5	0	3834598.726	3217085.188	2900595.961	3145161.717	4193993.569	3426998.447	2877261.236	217961.5129	2327069.114	1711502.787	2454683.35	2969874.47
A0A0G2K9V6	Tars	Threonine--tRNA ligase, cytoplasmic OS=Rattus norvegicus OX=10116 GN=Tars PE=1 SV=1	35	22	118	20	1	722	83.3	7.03	286.79	22	2	10021085.03	11735902.04	10597615.94	9668096.311	17029179.59	11403450.13	14735093.3	107479595.1	43183516.96	10837500.84	18170231.76	17184220.87
A0A0G2K9W7	Lrp2	Low-density lipoprotein receptor-related protein 2 OS=Rattus norvegicus OX=10116 GN=Lrp2 PE=1 SV=1	12	44	266	44	1	4660	519	5.24	601.8	44	0	46339341.44	42324543.32	43491028.95	40212716.87	46538144.21	42852500.7	13495977.42	1305039.777	15989015.36	27471638.63	55815903.26	31778164.35
A0A0G2K9Y7	LOC501233	Carboxylic ester hydrolase OS=Rattus norvegicus OX=10116 GN=LOC501233 PE=1 SV=1	28	11	53	1	1	544	59.8	5.69	140.97	11	0	525850.5071	NA	739147.281	1639140.065	859320.3857	1497842.323	NA	10146711.16	545690.8119	1122339.729	870849.5436	NA
A0A0G2K9Z5	#N/A	Uncharacterized protein OS=Rattus norvegicus OX=10116 PE=4 SV=1	14	1	2	1	1	118	13	6.76	6.09	1	0	NA	NA	NA	NA	NA	NA	NA	NA	252454.8135	1504724.418	NA	NA
A0A0G2KA11	Prex2	Phosphatidylinositol-3,4,5-trisphosphate-dependent Rac exchange factor 2 OS=Rattus norvegicus OX=10116 GN=Prex2 PE=1 SV=1	3	3	5	3	1	1598	181.6	7.44	9.2	3	0	1404423.361	1651909.039	1286705.947	1254857.652	2321769.55	1407482.414	2012431.375	NA	774898.3407	917527.2382	698987.554	2694183.543
A0A0G2KA14	Clec16a	C-type lectin domain-containing 16A OS=Rattus norvegicus OX=10116 GN=Clec16a PE=1 SV=1	2	2	7	2	1	979	110.3	7.43	15.54	2	0	1191502.813	2255285.25	976408.5178	1596569.874	1364365.157	1811591.697	1667094.939	233719.6155	1849945.144	2046984.738	1537291.559	1593881.998
A0A0G2KA25	Tm9sf4	Transmembrane 9 superfamily member OS=Rattus norvegicus OX=10116 GN=Tm9sf4 PE=1 SV=1	23	13	131	13	1	643	74.7	7.06	281.92	13	0	41597272.91	45545148.06	54692252.51	41347345.64	49263762.92	57876086.53	15829783.77	36257512.35	29810697.91	33159172.27	44830628.31	31788657.04
A0A0G2KA27	Madd	MAP kinase-activating death domain protein OS=Rattus norvegicus OX=10116 GN=Madd PE=1 SV=1	1	1	2	1	1	1627	181	6.21	6.2	1	0	402120.3732	NA	NA	92809.41238	NA	222489.6706	NA	NA	251754.4817	272161.0234	NA	221160.1312
A0A0G2KA38	Isg20	Interferon-stimulated exonuclease gene 20 OS=Rattus norvegicus OX=10116 GN=Isg20 PE=4 SV=1	4	1	3	1	1	185	20.9	8.65	4.03	1	0	139112.9818	164008.1875	125866.0501	120679.4383	176953.4511	119189.1461	269424.6612	NA	279470.9518	330643.3067	523298.6941	140295.7728
A0A0G2KA50	Vps39	VPS39 HOPS complex subunit OS=Rattus norvegicus OX=10116 GN=Vps39 PE=1 SV=1	12	8	41	8	1	886	101.6	6.98	79.14	8	0	2268841.49	4455606.953	3756553.962	3365019.638	4923665.951	3702209.154	1826865.872	1262872.237	3387522.613	4929969.488	6719411.736	5986376.793
A0A0G2KA88	Soga1	Suppressor of glucose, autophagy-associated 1 OS=Rattus norvegicus OX=10116 GN=Soga1 PE=4 SV=1	2	2	2	2	1	1452	163.2	6.24	4	2	0	221012.6431	57863.78125	154040.7398	141297.054	78062.40656	43169.2777	431508.9388	NA	135016.1569	100644.5763	413282.3255	531592.4316
A0A0G2KAE1	Lims2	LIM and senescent cell antigen-like-containing domain protein OS=Rattus norvegicus OX=10116 GN=Lims2 PE=1 SV=1	25	7	45	3	1	341	38.9	8.03	105.9	7	0	2005161.761	2767040.531	1513200.972	1517996.751	1751020.058	1426685.682	3294652.217	3285701.646	3217783.371	1426269.689	3010636.728	3306278.547
A0A0G2KAE2	Tusc3	Tumor suppressor candidate 3 OS=Rattus norvegicus OX=10116 GN=Tusc3 PE=4 SV=1	4	1	2	1	1	347	39.6	10.13	5.12	1	0	NA	NA	NA	NA	NA	1019377.047	NA	279796.6576	NA	NA	624133.8806	NA
A0A0G2KAH4	Dock6	Dedicator of cytokinesis 6 OS=Rattus norvegicus OX=10116 GN=Dock6 PE=1 SV=1	11	17	57	14	1	2113	236.6	6.89	121.77	17	0	4336838.636	5099693	4247820.815	3947649.766	5906458.595	5954147.195	4528526.576	462653.9893	3889415.642	3811734.243	4078325.402	6237408.888
A0A0G2KAH7	Ext2	Exostosin glycosyltransferase 2 OS=Rattus norvegicus OX=10116 GN=Ext2 PE=1 SV=1	2	1	1	1	1	718	82	6.87	2.39	1	0	NA	NA	NA	NA	NA	NA	NA	NA	NA	NA	NA	NA
A0A0G2KAI8	Drg2	Developmentally-regulated GTP-binding protein 2 OS=Rattus norvegicus OX=10116 GN=Drg2 PE=1 SV=1	15	4	16	4	1	364	40.5	9.35	35.47	4	0	1241613.36	1152275.75	NA	1834012.776	1538747.46	1219860.222	2757530.179	2068011.322	3120418.928	331875.1403	2235193.818	3653678.763
A0A0G2KAI9	Rsph9	Radial spoke head 9 homolog OS=Rattus norvegicus OX=10116 GN=Rsph9 PE=4 SV=1	11	3	8	3	1	276	31.2	5.41	9.61	3	0	565735.6996	1530083.391	1708976.863	2705724.282	685435.905	1048833.11	2921307.662	NA	2258442.177	2575530.702	1566474.916	1038679.783
A0A0G2KAJ7	Col12a1	Collagen alpha-1(XII) chain OS=Rattus norvegicus OX=10116 GN=Col12a1 PE=1 SV=1	6	12	93	12	1	3143	342.3	5.64	215.22	12	0	15101094.53	13085595.81	13339060.18	11947999.85	18286996.83	10603782.52	11999804.8	98757.28896	5618614.851	10616215.17	15201777.49	13250517.96
A0A0G2KAL1	#N/A	Uncharacterized protein OS=Rattus norvegicus OX=10116 PE=1 SV=1	14	1	1	1	1	116	12.7	8.5	2.17	1	0	NA	NA	NA	NA	NA	NA	NA	NA	NA	NA	NA	NA
A0A0G2KAM3	Pdhb	Pyruvate dehydrogenase E1 component subunit beta, mitochondrial OS=Rattus norvegicus OX=10116 GN=Pdhb PE=1 SV=1	28	10	168	10	1	423	46.2	8.41	424.75	10	0	62246635.06	83097520.56	114505173.8	111980231.9	85447503.59	73868832.46	34278895.21	30167743.7	22817972.16	68702709.75	46592714.34	38087930.22
A0A0G2KAM4	Fscn1	Fascin OS=Rattus norvegicus OX=10116 GN=Fscn1 PE=3 SV=1	20	7	49	7	1	492	53.8	7.4	123.29	7	0	16151525.73	10652391.06	16869211.74	11828853.48	3406769.476	12540536.12	20029320.27	1496315.185	22012854.4	8564875.704	11203245.03	13234317.79
A0A0G2KAN1	NEWGENE_621351	Collagen, type I, alpha 2 OS=Rattus norvegicus OX=10116 GN=NEWGENE_621351 PE=1 SV=1	12	11	65	11	1	1372	129.5	9.29	177.6	11	0	6132100.745	15196783.93	17995608.29	27736581.13	11849259.73	23909261.32	6084990.623	1573388.519	3856495.755	111345261.6	34807247.9	12654046.76
A0A0G2KAN5	Erh	ERH, mRNA-splicing and mitosis factor OS=Rattus norvegicus OX=10116 GN=Erh PE=1 SV=1	14	1	2	1	1	122	14.2	5.54	3.56	1	0	NA	NA	NA	NA	NA	NA	NA	NA	NA	NA	NA	NA
A0A0G2KAN7	Gls	Glutaminase kidney isoform, mitochondrial OS=Rattus norvegicus OX=10116 GN=Gls PE=1 SV=1	18	7	47	1	1	602	65.8	8.12	115.28	7	0	672283.3123	554372.9375	582444.713	NA	1052787.686	496112.4524	556481.0199	NA	474368.434	159608.8401	631217.1269	518206.0256
A0A0G2KAP1	Ero1b	Endoplasmic reticulum oxidoreductase 1 beta OS=Rattus norvegicus OX=10116 GN=Ero1b PE=1 SV=1	16	6	10	5	1	467	53.4	8.09	25.32	6	0	184334.0065	79233.32813	997930.1214	613617.1119	632303.176	738890.5266	172681.0499	4878177.764	242705.7264	1704280.91	129937.0494	416436.6119
A0A0G2KAU8	Acot12	Acyl-coenzyme A thioesterase 12 OS=Rattus norvegicus OX=10116 GN=Acot12 PE=1 SV=1	15	8	11	8	1	573	63.4	6.9	22.49	8	0	1873466.327	4201390.25	2876138.819	2081579.181	3389753.566	5091830.474	3832122.392	23077760	5096204.394	3956840.239	3420286.966	3338879.437
A0A0G2KAV3	Amotl2	Angiomotin-like protein 2 OS=Rattus norvegicus OX=10116 GN=Amotl2 PE=4 SV=1	2	1	1	1	1	796	88	7.55	2.52	1	0	NA	NA	NA	NA	NA	NA	NA	NA	NA	NA	NA	NA
A0A0G2KAV5	Akr1d1	3-oxo-5-beta-steroid 4-dehydrogenase OS=Rattus norvegicus OX=10116 GN=Akr1d1 PE=1 SV=1	51	15	31	1	1	314	36.5	6.86	84.04	15	14	5062031.222	7010195.84	10796141.65	6485987.86	5003220.669	6604420.463	4936108.813	1037527962	5704387.04	4393651.397	6486370.881	8947420.755
A0A0G2KAW5	Wdr48	WD repeat domain 48 OS=Rattus norvegicus OX=10116 GN=Wdr48 PE=1 SV=1	10	5	26	5	1	691	77.5	6.95	64.58	5	0	4787595.165	6406655.813	3787225.604	3864479.181	5774654.696	3495748.282	4901506.431	4660456.973	7383086.537	1801749.083	3529184.675	6160718.297
A0A0G2KAX0	Psme4	Proteasome activator subunit 4 OS=Rattus norvegicus OX=10116 GN=Psme4 PE=1 SV=1	1	2	5	2	1	1865	213.8	7.37	9.22	2	0	36028.91605	78848.85156	NA	NA	153252.4242	24832.01611	79377.14612	211034.6177	193477.7293	NA	NA	NA
A0A0G2KAX2	RGD1305455	Similar to hypothetical protein FLJ10925 OS=Rattus norvegicus OX=10116 GN=RGD1305455 PE=4 SV=1	3	1	1	1	1	580	62.8	8.68	2.56	1	0	420165.7146	429501.8438	529697.5978	395622.4818	349200.5337	594803.1211	442434.2617	NA	646571.8033	463272.7075	1068464.966	NA
A0A0G2KB10	Setd2	SET domain-containing 2 OS=Rattus norvegicus OX=10116 GN=Setd2 PE=1 SV=1	1	1	3	1	1	2523	283.8	6.42	5.92	1	0	618112.2567	1071612.875	3863960.363	1882110.818	1134327.92	1454482.805	1850981.691	729167.0459	887789.3584	4697492.52	2364179.503	1028362.184
A0A0G2KB11	Stard10	StAR-related lipid transfer domain-containing 10 OS=Rattus norvegicus OX=10116 GN=Stard10 PE=1 SV=1	15	4	6	4	1	363	40.2	9.04	15.08	4	0	NA	83288.89844	NA	NA	314068.7874	60879.2065	173197.1882	6797095.526	206874.1356	NA	101758.3601	258659.0052
A0A0G2KB20	Bnc2	Basonuclin 2 OS=Rattus norvegicus OX=10116 GN=Bnc2 PE=4 SV=1	2	1	1	1	1	916	102.3	6.54	1.92	1	0	NA	NA	NA	NA	NA	NA	NA	NA	NA	NA	NA	204999.3469
A0A0G2KB26	Mxra8	Limitrin, isoform CRA_b OS=Rattus norvegicus OX=10116 GN=Mxra8 PE=4 SV=1	16	6	20	6	1	442	49.7	7.25	48.22	6	0	4574876.057	5323824.125	8998591.707	7102913.104	6540574.761	7307244.41	3723906.143	443093.4212	4342002.075	2975475.778	6650453.581	8185705.851
A0A0G2KB31	Hpn	Serine protease hepsin OS=Rattus norvegicus OX=10116 GN=Hpn PE=1 SV=1	7	3	5	2	1	416	44.9	7.87	2.43	3	0	NA	NA	NA	NA	NA	NA	NA	1457994.576	NA	NA	NA	NA
A0A0G2KB47	Egfl6	EGF-like-domain, multiple 6 OS=Rattus norvegicus OX=10116 GN=Egfl6 PE=1 SV=1	6	3	8	3	1	551	61.5	8.4	17.74	3	0	2146917.231	1967281.969	3872191.005	2562413.591	2853998.008	3532458.562	NA	571394.3597	NA	NA	NA	NA
A0A0G2KB56	Gfpt1	Glutamine fructose-6-phosphate transaminase 1, isoform CRA_a OS=Rattus norvegicus OX=10116 GN=Gfpt1 PE=1 SV=1	36	18	93	15	1	699	78.9	7.02	240.08	18	3	16320626.62	15766919.2	18359151.37	17510941.48	17342991.21	15370852.99	24691806.37	24912329.65	42621066.28	21203558.26	29021603.85	47716813.61
A0A0G2KB98	Gsk3b	Glycogen synthase kinase-3 beta OS=Rattus norvegicus OX=10116 GN=Gsk3b PE=1 SV=1	4	1	7	1	1	430	48	8.7	19.09	1	0	NA	NA	136897.8779	275598.4781	504822.7962	409697.9451	249808.3744	NA	1092969.068	551690.3527	566121.3837	942044.3659
A0A0G2KBB9	Ank2	Ankyrin 2 OS=Rattus norvegicus OX=10116 GN=Ank2 PE=1 SV=1	2	8	44	3	1	3963	433.3	5.16	47.36	8	0	543119.8514	659230.3125	642970.1763	643434.2292	931726.3195	499231.4993	327551.8554	165764.8979	365412.6157	473417.1612	NA	NA
A0A0G2KBC7	Pfkm	ATP-dependent 6-phosphofructokinase OS=Rattus norvegicus OX=10116 GN=Pfkm PE=1 SV=1	22	15	127	12	1	851	93.5	7.42	250.56	15	0	10476014.24	8042352.781	9790659.573	8199345.964	7119916.076	6201808.598	10730804.54	1038576.418	13510797.78	5925157.788	7219523.354	22323745.12
A0A0G2QC02	Skiv2l	Ski2-like RNA helicase OS=Rattus norvegicus OX=10116 GN=Skiv2l PE=1 SV=1	16	12	45	12	1	1244	137.2	6.38	110.02	12	0	7340209.542	2925971.895	2129272.93	3301676.198	2936372.904	2669393.999	6607215.736	5190947.871	8583168.079	4098148.222	6737490.786	6736496.106
A0A0G2QC04	Pls1	Plastin 1 OS=Rattus norvegicus OX=10116 GN=Pls1 PE=1 SV=1	9	6	125	1	1	630	70.3	5.48	333.94	6	0	207113.6866	529736	534352.9951	561795.0386	361689.7347	525573.8872	NA	210015.7463	NA	1145775.857	NA	NA
A0A0G2QC06	Tf	Serotransferrin OS=Rattus norvegicus OX=10116 GN=Tf PE=1 SV=1	54	58	1464	13	1	979	107.3	8.05	3950.9	58	46	1389940681	1122785838	1330329993	1636461486	1546099781	1434189792	1286893443	1491440906	1798032097	2430194243	1774714375	1468842862
A0A0G2QC17	Pdp1	Protein phosphatase 2C, magnesium dependent, catalytic subunit, isoform CRA_a OS=Rattus norvegicus OX=10116 GN=Pdp1 PE=1 SV=1	20	8	47	8	1	563	63.8	6.81	86.7	8	0	5969053.938	7904678.563	14269505.06	13432476.41	9113746.869	7752762.645	14023394.65	11222870.13	1769644.664	9735993.795	7426121.084	6103731.949
A0A0G2QC21	Arhgef7	Rho guanine nucleotide exchange factor 7 OS=Rattus norvegicus OX=10116 GN=Arhgef7 PE=1 SV=1	15	11	78	8	1	862	97.1	6.74	161.4	11	0	8982748.456	7876216.688	6404086.278	5992598.158	8130907.848	7563635.027	15647609.92	3264583.644	6753447.747	7605436.343	11945651.26	18363978.52
A0A0G2QC28	Nlrp1a	NLR family, pyrin domain-containing 1A OS=Rattus norvegicus OX=10116 GN=Nlrp1a PE=4 SV=1	4	3	3	3	1	1229	139.4	6.58	7.72	3	0	NA	NA	NA	NA	NA	NA	NA	NA	NA	NA	NA	NA
A0A0G2QC33	Atg4b	Cysteine protease OS=Rattus norvegicus OX=10116 GN=Atg4b PE=1 SV=1	3	1	1	1	1	393	44.3	5.07	1.67	1	0	NA	150004.3594	122866.4777	NA	315502.3297	127220.115	118295.6061	NA	207314.0393	NA	155843.4199	251658.0766
A0A0G2QC39	Txlng	Taxilin gamma OS=Rattus norvegicus OX=10116 GN=Txlng PE=1 SV=1	3	1	4	1	1	530	60.8	7.68	7.91	1	0	NA	NA	334564.0021	143405.323	NA	NA	NA	267162.7532	NA	NA	156802.2166	451236.7821
A0A0G2QC52	Rabl2a	RAB, member of RAS oncogene family-like 2 OS=Rattus norvegicus OX=10116 GN=Rabl2 PE=1 SV=1	6	1	1	1	1	250	28.5	6.18	3.05	1	0	NA	NA	NA	NA	NA	NA	NA	NA	234991.3117	365786.7085	NA	NA
A0A0H2UH94	Gcc2	GRIP and coiled-coil domain-containing protein 2 OS=Rattus norvegicus OX=10116 GN=Gcc2 PE=1 SV=1	7	10	36	10	1	1681	195.2	5.1	100.41	10	0	3682405.452	3816470.625	6255732.063	4155422.544	2714292.227	4055289.604	7513207.571	3138285.105	6176945.524	4044053.732	4571884.544	4202289.501
A0A0H2UH97	Anapc5	Anaphase-promoting complex subunit 5 OS=Rattus norvegicus OX=10116 GN=Anapc5 PE=1 SV=1	1	1	1	1	1	740	83.1	6.77	0	1	0	77797.2596	78695.49219	62411.86347	50514.32016	105749.4611	53715.63358	118845.1944	NA	243080.0185	127094.8959	NA	120999.3474
A0A0H2UHA1	Masp1	Mannan-binding lectin serine protease 1 OS=Rattus norvegicus OX=10116 GN=Masp1 PE=1 SV=1	2	1	1	1	1	704	80.1	5.69	2.78	1	0	NA	NA	NA	NA	NA	NA	NA	NA	NA	NA	NA	NA
A0A0H2UHA7	Slc15a2	Solute carrier family 15 (H+/peptide transporter), member 2, isoform CRA_a OS=Rattus norvegicus OX=10116 GN=Slc15a2 PE=1 SV=1	3	2	5	2	1	740	82.6	7.78	14.1	2	0	1201241.809	1302029.563	1883701.628	1889443.059	2390157.234	1569454.811	2777946.384	357709.9953	951576.7972	905590.7977	887492.8283	1054960.073
A0A0H2UHB1	Hsd17b7	3-keto-steroid reductase OS=Rattus norvegicus OX=10116 GN=Hsd17b7 PE=1 SV=1	4	1	1	1	1	335	37.5	7.52	2.53	1	0	272909.6731	295870.8125	336841.5682	NA	NA	NA	214400.9711	1259263.932	NA	NA	NA	NA
A0A0H2UHB3	Car4	Carbonic anhydrase 4 OS=Rattus norvegicus OX=10116 GN=Car4 PE=1 SV=1	47	16	259	16	1	314	35.6	6.8	690.35	16	0	298204423.2	310031153.5	189702728.9	153878889.8	330038820.7	319000865.8	124114896	1805452.881	148160957.8	113765051	127049392.1	249936011.3
A0A0H2UHB6	Upk1b	RCG52686 OS=Rattus norvegicus OX=10116 GN=Upk1b PE=3 SV=1	11	3	4	3	1	287	33.1	5.44	7.55	3	0	2169099.617	100803.6797	1065276.406	360713.585	1438099.624	575862.1777	903680.8763	122580.6625	NA	565109.9222	98978.95138	322475.7712
A0A0H2UHB7	Slc4a4	Anion exchange protein OS=Rattus norvegicus OX=10116 GN=Slc4a4 PE=1 SV=1	1	1	1	1	1	1099	123.5	6.79	0	1	0	NA	NA	NA	NA	NA	NA	NA	NA	NA	NA	NA	NA
A0A0H2UHC9	Slc35b1	Solute carrier family 35 member B1 OS=Rattus norvegicus OX=10116 GN=Slc35b1 PE=4 SV=1	3	1	4	1	1	358	39.5	9.35	5.95	1	0	362026.238	622458.25	446500.8705	335667.3691	675841.9269	492312.7241	509865.0108	635126.3149	703892.7367	1312555.839	1195609.265	711259.4916
A0A0H2UHE1	Suclg1	Succinate--CoA ligase [ADP/GDP-forming] subunit alpha, mitochondrial OS=Rattus norvegicus OX=10116 GN=Suclg1 PE=1 SV=1	21	8	143	8	1	360	37.5	9.48	355.33	8	0	39893219.9	44810001.81	102676544.4	85845209.97	48723567.53	44878563.54	38664341.85	65891864.72	23173101.74	35402603.97	21191779.65	23941815.14
A0A0H2UHE5	Ppm1a	Protein phosphatase 1A OS=Rattus norvegicus OX=10116 GN=Ppm1a PE=1 SV=1	8	3	6	3	1	472	53.4	7.85	16.26	3	0	764278.6727	2259666.313	1536427.759	1321287.075	2394209.709	726428.7383	NA	2793566.52	1967459.14	895809.9094	659322.5564	370643.8108
A0A0H2UHF6	Arl6ip5	PRA1 family protein OS=Rattus norvegicus OX=10116 GN=Arl6ip5 PE=1 SV=1	10	2	35	2	1	207	23.6	9.6	80.02	2	0	17123131.85	17671400	22690856.18	16676746.44	19335573.31	23129065.64	7547944.261	9100658.78	21298915.72	15622429.74	24823820.74	30261444.13
A0A0H2UHF8	Orm1	Alpha-1-acid glycoprotein OS=Rattus norvegicus OX=10116 GN=Orm1 PE=1 SV=1	4	1	2	1	1	235	26.7	6.54	4.49	1	0	NA	NA	NA	NA	3646893.576	NA	3780944.29	NA	2256112.493	4794047.365	3942802.834	NA
A0A0H2UHG0	Yars	Tyrosine--tRNA ligase OS=Rattus norvegicus OX=10116 GN=Yars PE=1 SV=1	23	12	48	12	1	564	63	8.44	88.18	12	0	15000305.11	10666468.69	9834256.054	6337055.706	13574544.65	15231625.82	11539052.63	23268770.28	18871126.67	10739151.39	15989759.82	21068049.65
A0A0H2UHG3	Cul5	Cullin-5 OS=Rattus norvegicus OX=10116 GN=Cul5 PE=1 SV=1	14	10	43	10	1	855	98.7	8.6	93.59	10	0	3197413.93	4192686.156	3044839.449	3078053.488	3984281.401	3202011.069	4658355.045	2837156.744	7609495.055	3413487.303	4589021.585	6237763.854
A0A0H2UHH0	Miox	Inositol oxygenase OS=Rattus norvegicus OX=10116 GN=Miox PE=1 SV=1	3	1	1	1	1	289	33.6	5.63	1.74	1	0	NA	NA	NA	NA	NA	NA	NA	NA	NA	NA	NA	NA
A0A0H2UHH2	Apcs	Serum amyloid P-component OS=Rattus norvegicus OX=10116 GN=Apcs PE=1 SV=1	19	4	18	4	1	275	31.6	7.52	39.95	4	0	205702.8588	1331664.633	905473.6245	768991.9329	790418.717	1061505.569	2869844.666	42464855.5	841550.9685	5015986.668	2859448.892	1660682.956
A0A0H2UHH7	Lck	Tyrosine-protein kinase OS=Rattus norvegicus OX=10116 GN=Lck PE=1 SV=1	6	3	61	1	1	520	58.9	5.21	125.66	3	0	248511.0241	444999.2188	402002.7619	231645.8902	408968.8284	540252.1298	582060.2886	NA	579069.2422	231943.8408	201450.495	242000.3041
A0A0H2UHI7	Atad1	ATPase family AAA domain-containing protein 1 OS=Rattus norvegicus OX=10116 GN=Atad1 PE=1 SV=1	23	8	44	8	1	403	45.1	7.8	112.89	8	0	11188156.25	13132031.86	10652132.84	12082030.56	15713519.82	7525840.445	4965887.622	12287080.17	5300988.165	6312706.33	11064737.38	11636140.67
A0A0H2UHI8	Sftpc	Pulmonary surfactant-associated protein C OS=Rattus norvegicus OX=10116 GN=Sftpc PE=4 SV=1	30	4	108	4	1	215	23.9	7.85	317.58	4	0	137871220.3	133705342.2	203778927.1	195970176.6	152079795.1	161639632	34736581.38	4659125.953	38849440.36	81737667.61	172820097	88128462.04
A0A0H2UHJ1	S100a9	Protein S100-A9 OS=Rattus norvegicus OX=10116 GN=S100a9 PE=1 SV=1	29	5	50	5	1	133	15.2	8.05	63.55	5	0	49000042.45	28238512.11	21956840.67	66341328.98	40447957.29	52620652.06	29052449.72	4798869.318	33737826.82	91195258.5	22075175.63	56493439.03
A0A0H2UHL1	Far1	Fatty acyl-CoA reductase OS=Rattus norvegicus OX=10116 GN=Far1 PE=3 SV=1	14	7	44	7	1	574	65.6	8.97	92.59	7	0	7394432.956	7575833.875	10842712.76	8275884.796	10486327.46	8183279.568	3777473.814	536668.8806	3707522.462	5942179.534	13239022.01	7439386.599
A0A0H2UHM0	Vps28	Vacuolar protein sorting-associated protein 28 homolog OS=Rattus norvegicus OX=10116 GN=Vps28 PE=1 SV=1	34	5	19	5	1	221	25.5	5.54	49.48	5	0	4458977.753	4010001.125	2456368.032	3410085.475	4739152.299	3224162.221	2201505.648	1680440.944	6711337.163	1223569.957	5460804.615	7143234.352
A0A0H2UHM5	Pdia3	Protein disulfide-isomerase OS=Rattus norvegicus OX=10116 GN=Pdia3 PE=1 SV=1	66	41	1154	41	1	510	57	6.21	2803.8	41	0	1702443040	1676003257	2040442054	1885392116	2079542352	1967832896	2032566290	3652252776	1286153540	1225654857	1989852865	2191132694
A0A0H2UHN7	Cyp27a1	RCG24013, isoform CRA_a OS=Rattus norvegicus OX=10116 GN=Cyp27a1 PE=1 SV=1	20	8	39	8	1	550	62.5	9.32	104.46	8	0	4454432.458	3766571.352	7658989.797	7076751.2	6513525.594	5745232.054	351311.9387	33036388.87	2149909.806	3856867.537	5970744.287	3441043.556
A0A0H2UHP1	Aldh1a1	Retinal dehydrogenase 1 OS=Rattus norvegicus OX=10116 GN=Aldh1a1 PE=1 SV=1	59	24	408	15	1	521	56.6	7.8	1032.11	24	7	142125165.4	196394036.2	64978932.54	103885186.7	181627354.7	106633064.2	130711439.4	52464581.89	197063194.6	146764855	140861464.5	121416196.6
A0A0H2UHP7	Apoa5	Apolipoprotein A-V OS=Rattus norvegicus OX=10116 GN=Apoa5 PE=1 SV=1	6	2	3	2	1	391	43.9	6.39	8.07	2	0	NA	331397.875	83369.28413	NA	NA	NA	182616.8709	2319970.591	NA	NA	NA	NA
A0A0H2UHP9	Rab6a	RCG39700, isoform CRA_d OS=Rattus norvegicus OX=10116 GN=Rab6a PE=1 SV=1	48	9	230	1	1	208	23.5	5.54	513.45	9	7	42040757.19	42240606.2	54005489.55	36342797.08	62922113.99	47016838.54	27121024.33	24130855.15	39062604.48	27108146.4	51916741.75	57089811.96
A0A0H2UHQ0	Slc3a2	4F2 cell-surface antigen heavy chain OS=Rattus norvegicus OX=10116 GN=Slc3a2 PE=1 SV=1	33	13	194	13	1	566	61.8	5.19	518.58	13	0	36091730.31	34117941.46	45150216.74	41347018.09	47634258.36	48259773.16	48733103.27	32327871.13	96699559.66	72464713.17	81158673.48	73606307.96
A0A0H2UHR6	F10	Coagulation factor X OS=Rattus norvegicus OX=10116 GN=F10 PE=1 SV=1	14	6	37	6	1	494	55.4	5.41	104.77	6	0	1966045.36	1689486.625	2613890.727	1198869.172	1980823.987	2136489.373	3114072.35	19457089.01	3245787.972	4026819.8	7375943.818	11019406.69
A0A0H2UHS7	Rpl18	60S ribosomal protein L18 OS=Rattus norvegicus OX=10116 GN=Rpl18 PE=1 SV=1	41	7	85	7	1	189	21.8	11.78	188.93	7	0	54373174.52	28203739	34439049.4	30293064.01	5120174.201	26572844.04	63415479.01	264402705.5	76352131.78	5995444.296	49450822.28	73237367.49
A0A0H2UHS8	Fxyd1	FXYD domain-containing ion transport regulator OS=Rattus norvegicus OX=10116 GN=Fxyd1 PE=1 SV=1	13	1	7	1	1	95	10.6	8.54	12.72	1	0	2019234.967	915325.3125	1137506.099	861313.9882	1002591.428	1430487.536	766509.2519	6238669.307	2930509.018	1529412.807	1253812.794	2021636.709
A0A0H2UHT3	Mrpl22	39S ribosomal protein L22, mitochondrial OS=Rattus norvegicus OX=10116 GN=Mrpl22 PE=1 SV=1	5	1	2	1	1	223	25.8	10.14	4.87	1	0	551165.5848	NA	811250.9347	NA	915256.0669	NA	NA	NA	NA	688394.2885	743451.6267	NA
A0A0H2UHT5	Ppm1g	Protein phosphatase 1G OS=Rattus norvegicus OX=10116 GN=Ppm1g PE=1 SV=1	4	2	6	2	1	542	58.7	4.39	12.1	2	0	5325813.243	12495481	13908425.24	19701129.82	4783241.803	24410188.85	4933546.866	1888249.558	3772378.451	130312734.6	7621698.882	4740407.424
A0A0H2UHU1	Rpl37a	60S ribosomal protein L37a OS=Rattus norvegicus OX=10116 GN=Rpl37a PE=3 SV=1	33	2	30	2	1	92	10.3	10.29	49.82	2	0	17474505.09	7364744	4105349.538	6136046.555	7749585.534	3674372.214	7000198.021	29579294.82	15169272.61	NA	9086673.789	15710146.12
A0A0H2UHV9	Copg2	Coatomer subunit gamma OS=Rattus norvegicus OX=10116 GN=Copg2 PE=1 SV=1	19	13	76	11	1	870	97.5	5.74	169.49	13	0	11267735.99	5874263.484	20854607.41	10672554.18	13214194.25	9084208.136	18794173.49	13267401.75	18408932.34	17719006.49	27927936.67	24708929.39
A0A0H2UHX0	Trpm4	Transient receptor potential cation channel subfamily M member 4 OS=Rattus norvegicus OX=10116 GN=Trpm4 PE=1 SV=1	3	3	3	3	1	1296	144.3	8.05	6.59	3	0	1063089.096	1087467.813	1002416.835	1018238.253	1034015.02	1432827.051	318502.7725	NA	1779859.795	883600.6555	939268.3089	692478.8353
A0A0H2UHX3	Rps4x	40S ribosomal protein S4 OS=Rattus norvegicus OX=10116 GN=Rps4x PE=3 SV=1	50	15	339	15	1	290	32.5	10.07	756.57	15	0	224999378.6	114703102.5	149022027.2	105339931.3	127323668.6	103367466	208113510	398144820.5	235015281.9	95984298.78	191267841.1	230339012.3
A0A0H2UHY4	Slc39a4	Solute carrier family 39 (Zinc transporter), member 4 (Predicted), isoform CRA_a OS=Rattus norvegicus OX=10116 GN=Slc39a4 PE=4 SV=1	22	8	169	8	1	657	71.2	5.36	506.16	8	0	21270453.66	31276772.91	21328214.9	17416472.31	40515799.34	25634990.61	42348987.97	501735.1607	42105834.5	38478113.99	40799924.61	24069978.91
A0A0H2UHZ0	Slc34a2	Sodium-dependent phosphate transport protein 2B OS=Rattus norvegicus OX=10116 GN=Slc34a2 PE=1 SV=1	10	7	53	7	1	735	80	7.83	136.92	7	0	41244414.59	47569757	43608694.96	36833174.62	45564504.19	48063973.12	7359852.318	436054.3497	27051041.26	19604077.01	24701687.24	14950038.05
A0A0H2UHZ2	Nap1l4	Nucleosome assembly protein 1-like 4 OS=Rattus norvegicus OX=10116 GN=Nap1l4 PE=1 SV=1	26	8	74	7	1	387	44	4.74	191.36	8	1	8976329.544	12870808.75	11674959.88	12071039.24	19535485.45	11800480.99	23677932.88	7805799.174	24718319.54	7252133.098	18516063.71	21053160.72
A0A0H2UHZ4	Zranb2	Zinc finger Ran-binding domain-containing protein 2 OS=Rattus norvegicus OX=10116 GN=Zranb2 PE=1 SV=1	9	3	3	3	1	332	37.8	9.1	6.27	3	0	12485226.5	1414832.125	1547491.533	562762.5695	346066.6143	1176773.909	387040.6188	310788.447	NA	1035789.144	281741.1205	992696.9106
A0A0H2UHZ9	Gimap8	GTPase IMAP family member 8 OS=Rattus norvegicus OX=10116 GN=Gimap8 PE=4 SV=1	20	11	45	11	1	716	80	8.07	108.35	11	0	10453727.75	8406127.344	6218454.624	7465819.679	6768045.746	7136295.091	6899980.495	1473921.626	3608637.466	2764035.425	3854276.365	8530151.204
A0A0H2UI08	Cd37	Tetraspanin OS=Rattus norvegicus OX=10116 GN=Cd37 PE=3 SV=1	4	1	1	1	1	304	34.3	8.57	2.16	1	0	983678.5782	541669.1875	654803.0486	736868.8155	818360.9956	1032321.181	NA	338370.1218	593778.2852	NA	NA	NA
A0A0H2UI10	Mgea5	Protein O-GlcNAcase OS=Rattus norvegicus OX=10116 GN=Oga PE=1 SV=1	1	1	1	1	1	948	106.1	5.03	2.85	1	0	NA	NA	NA	NA	NA	NA	NA	NA	NA	NA	NA	NA
A0A0H2UI14	Fbxl20	F-box/LRR-repeat protein 20 OS=Rattus norvegicus OX=10116 GN=Fbxl20 PE=1 SV=1	17	6	19	6	1	436	48.4	7.49	48.96	6	0	6322334.826	7408725.719	5103104.162	6052973.43	4757356.961	9762538.415	8637733.343	9090016	8368778.967	1522924.956	4130999.827	4956864.649
A0A0H2UI19	F12	Coagulation factor XII OS=Rattus norvegicus OX=10116 GN=F12 PE=1 SV=1	17	8	59	8	1	603	66.7	7.3	139.41	8	0	5556282.493	4068795.172	722360.2698	2778504.047	3800175.369	3712629.084	23579482.82	9633902.531	30552140.8	18537083.98	24910849.94	23324632.15
A0A0H2UI21	Crat	Carnitine O-acetyltransferase OS=Rattus norvegicus OX=10116 GN=Crat PE=1 SV=1	16	8	19	8	1	626	71	8.21	43.19	8	0	4878818.959	6287053.422	4150568.048	7710543.992	3521194.916	5346913.136	2678101.005	7994095.253	4301190.209	2366677.232	2770267.064	1898675.967
A0A0H2UI26	Steap3	Metalloreductase STEAP3 OS=Rattus norvegicus OX=10116 GN=Steap3 PE=1 SV=1	6	2	5	2	1	498	55.6	9.22	11.06	2	0	679739.821	124853.4922	NA	NA	303913.4728	417888.9251	NA	1321341.605	737239.4856	NA	824335.1257	886741.2579
A0A0H2UI38	LOC100910336	Ribosomal protein S19-like2 OS=Rattus norvegicus OX=10116 GN=Rps19l2 PE=4 SV=1	38	9	131	9	1	157	17.4	10.62	267.27	9	0	92868855.01	46319433.96	44433961.01	44254711.72	41529452.58	50030130.06	72234139.62	228450636.3	66729863.05	16216921.98	65846533.08	93793276
A0A0H2UI42	Mrpl30	Mitochondrial ribosomal protein L30 OS=Rattus norvegicus OX=10116 GN=Mrpl30 PE=1 SV=1	7	1	1	1	1	179	20.7	10.04	3.32	1	0	NA	693741.0625	NA	NA	594971.491	779751.0962	NA	1986713.904	132720.1915	456374.8854	NA	NA
A0A0M6L0Y1	Prl8a9	Growth hormone d9 OS=Rattus norvegicus OX=10116 GN=Prl8a9 PE=2 SV=1	3	1	1	1	1	241	27.7	5.83	2.28	1	0	3285413.065	2413910.5	1922674.057	2455994.773	2336133.009	1468265.344	4231884.357	2661060.589	4373057.704	2050239.4	1848877.39	3019273.18
A0A0U1RRT8	44445	Septin 6 OS=Rattus norvegicus OX=10116 GN=Sept6 PE=1 SV=1	34	12	156	6	1	432	49.4	6.8	365.36	12	0	1486613.471	2138834.383	2380367.099	2381859.219	1872355.669	2533792.316	3771539.471	329293.8861	4615302.468	3735051.538	3735514.282	4346292.624
A0A0U1RRU5	Tab1	RCG59826 OS=Rattus norvegicus OX=10116 GN=Tab1 PE=1 SV=1	2	1	1	1	1	502	54.6	5.52	1.75	1	0	NA	NA	175944.7983	NA	412501.9053	NA	NA	NA	396368.125	NA	NA	NA
A0A0U1RRV5	Cluh	Clustered mitochondria protein homolog OS=Rattus norvegicus OX=10116 GN=Cluh PE=1 SV=1	19	20	43	20	1	1349	151.1	6.02	89.69	20	0	35968492.41	17273868.51	30621512.07	21125815.88	12899863.14	823928.9734	20431707.33	37471859.28	12954967.42	4430388.691	24292270.57	40449591.27
A0A0U1RRZ2	Eif2b1	Translation initiation factor eIF-2B subunit alpha OS=Rattus norvegicus OX=10116 GN=Eif2b1 PE=1 SV=1	3	1	1	1	1	305	33.7	8.03	0	1	0	NA	NA	NA	NA	NA	NA	NA	134309.4578	NA	92804.89624	NA	249920.2054
A0A0U1RRZ5	Prrc2a	Protein PRRC2A OS=Rattus norvegicus OX=10116 GN=Prrc2a PE=1 SV=1	1	2	3	2	1	2162	229	9.45	7.43	2	0	3022774.595	326759.1563	407578.3275	331875.1074	175665.9894	248608.8786	2001192.057	242605.0702	NA	317367.0314	NA	782235.5246
A0A0U1RS06	Tsr1	TSR1, ribosome maturation factor OS=Rattus norvegicus OX=10116 GN=Tsr1 PE=4 SV=1	42	1	1	1	1	65	6.5	10.95	0	1	0	NA	NA	NA	NA	NA	NA	NA	NA	NA	NA	NA	NA
A0A0U1RS13	Shank3	SH3 and multiple ankyrin repeat domains protein 3 (Fragment) OS=Rattus norvegicus OX=10116 GN=Shank3 PE=1 SV=2	18	22	141	1	1	1646	174.8	8.54	385.78	22	0	16995817.37	12376033	12140388.19	12704417.1	11128749.03	14661043.14	9114214.116	NA	3363750.118	NA	2969861.503	5368636.759
A0A0U1RS25	Upf1	UPF1, RNA helicase and ATPase OS=Rattus norvegicus OX=10116 GN=Upf1 PE=1 SV=1	28	24	107	24	1	1124	123.9	6.61	248.21	24	0	15146180.41	7336236.172	7396695.724	16541219.43	8796960.294	5997939.108	15464239.33	27045132.17	29526440.75	19142492.4	28150347.13	29800095.42
A0A0U5J7B5	#N/A	Tumor necrosis factor ligand superfamily member OS=Rattus norvegicus OX=10116 GN=Tnlg6a PE=2 SV=1	3	1	1	1	1	292	33.5	8.85	2.05	1	0	NA	478810.375	2088297	1071161.779	NA	1277242.867	NA	NA	NA	531000.5529	NA	NA
A0A140TA89	Gatm	Glycine amidinotransferase, mitochondrial OS=Rattus norvegicus OX=10116 GN=Gatm PE=1 SV=1	22	7	48	7	1	462	52.1	8.16	100.07	7	0	3067945.568	4991331.008	7094911.519	7452473.468	5143191.823	5674815.606	4416225.272	4270845.657	334750.7344	4800634.539	4068418.083	4603212.148
A0A140TAA4	Pdcd6ip	Programmed cell death 6-interacting protein OS=Rattus norvegicus OX=10116 GN=Pdcd6ip PE=1 SV=1	47	33	328	33	1	868	95.8	6.52	698.45	33	0	68303441.53	99695766.54	75269441.58	80133084.79	88323861.84	94481464.81	83215343.25	31827719.13	145132288.8	68732805.11	106247340.3	77105075.16
A0A140TAC3	Epn1	Epsin-1 OS=Rattus norvegicus OX=10116 GN=Epn1 PE=1 SV=1	5	3	22	3	1	576	60.2	4.81	31.55	3	0	2145844.354	3611328.219	1912476.545	2922355.494	2395168.241	2742642.485	3096261.569	3898413.993	2120020.597	954257.1001	2366491.406	2901666.479
A0A140TAC7	Gulo	L-gulonolactone oxidase OS=Rattus norvegicus OX=10116 GN=Gulo PE=1 SV=1	30	12	16	12	1	440	50.6	7.4	40.33	12	0	NA	502836.5469	197795.1994	246098.0985	391779.7335	111398.9709	531450.3057	139739969	500723.2031	226002.8566	1849219.395	322710.357
A0A140TAD1	Nudt5	ADP-sugar pyrophosphatase OS=Rattus norvegicus OX=10116 GN=Nudt5 PE=1 SV=1	11	2	6	2	1	219	24.1	5.38	13.63	2	0	2075464.583	1823987.688	2078743.198	1860945.653	2889832.978	1875705.054	2531157.054	320205.4256	1975770.48	819579.2406	1630240.57	1292198.173
A0A140TAE0	Mvp	Major vault protein OS=Rattus norvegicus OX=10116 GN=Mvp PE=1 SV=1	59	40	698	40	1	871	96.8	5.63	1669.43	40	0	140664881.4	146495542.3	169599619.3	238165987.2	197008104.7	130771116.7	350144366.8	47730502.74	346635412.7	329786796.8	352408607	388035490.3
A0A140TAE2	LOC500956	Hypothetical protein LOC500956 OS=Rattus norvegicus OX=10116 GN=LOC500956 PE=1 SV=1	10	3	16	3	1	288	32.8	7.65	45.3	3	0	NA	185368.9219	NA	168999.0858	214763.413	159033.6803	363904.5499	3705318.56	362552.6168	611091.9456	269202.4639	596493.8458
A0A140TAF0	Tpm3	RCG62531, isoform CRA_g OS=Rattus norvegicus OX=10116 GN=Tpm3 PE=1 SV=1	41	16	260	2	1	285	33	4.72	672.79	16	0	941448.7565	1477106.125	809545.3925	1041495.226	1959992.503	1171775.627	2036551.668	391746.1049	1043686.09	1870221.273	NA	1663170.629
A0A140TAF5	Clcc1	Chloride channel CLIC-like 1, isoform CRA_c OS=Rattus norvegicus OX=10116 GN=Clcc1 PE=1 SV=1	17	7	14	1	1	541	61.2	5.54	33.79	7	5	5037247.954	5098575.656	4850188.411	5032911.738	5277968.559	2728696.106	1591054.405	1104522.809	587602.4856	723019.6135	2175214.877	3242998.107
A0A140TAF7	Poglut1	Protein O-glucosyltransferase 1 OS=Rattus norvegicus OX=10116 GN=Poglut1 PE=1 SV=1	7	3	16	3	1	454	52.8	9.04	36.08	3	0	2353105.974	85015212.32	2675787.125	2766779.907	59553800.05	4406592.81	2702766.206	1541481.26	2930304.166	3155819.515	38362111.88	4187936.92
A0A140TAG3	Zc3h18	Zinc finger CCCH domain-containing protein 18 OS=Rattus norvegicus OX=10116 GN=Zc3h18 PE=1 SV=1	1	1	1	1	1	1007	112.2	8.38	3.23	1	0	552145.2781	105820.0313	NA	392624.7059	NA	NA	NA	NA	NA	NA	82029.35832	NA
A0A140TAH1	Hgs	Hepatocyte growth factor-regulated tyrosine kinase substrate OS=Rattus norvegicus OX=10116 GN=Hgs PE=1 SV=1	6	5	48	5	1	914	101.1	7.03	139.87	5	0	3915429.932	6857701.938	8219566.018	5446748.836	8421035.346	7205123.775	10071185.12	4324631.46	9293806.097	6840816.309	9292063.508	9658838.837
A0A140TAH2	Bpifb1	BPI fold-containing family B member 1 OS=Rattus norvegicus OX=10116 GN=Bpifb1 PE=4 SV=1	10	4	12	4	1	473	52.4	6.34	26.83	4	0	NA	NA	NA	NA	NA	NA	190809.6521	143245.6641	2613791.355	3478588.591	237163.5319	NA
A0A140TAI1	Ubqln1	Ubiquilin 1, isoform CRA_a OS=Rattus norvegicus OX=10116 GN=Ubqln1 PE=1 SV=1	6	2	4	1	1	582	62	4.94	10.01	2	0	257885.2125	405414.9688	NA	340362.1284	434887.9384	270126.04	698871.4606	562939.8518	696191.5095	405533.1978	1174099.162	941530.4572
A0A140TAI2	Btd	Biotinidase OS=Rattus norvegicus OX=10116 GN=Btd PE=1 SV=1	3	1	1	1	1	535	59.8	6.2	1.7	1	0	NA	NA	NA	NA	NA	NA	NA	NA	NA	NA	NA	NA
A0A140TAJ2	Serinc5	Serine incorporator 5 OS=Rattus norvegicus OX=10116 GN=Serinc5 PE=4 SV=1	3	1	1	1	1	461	51.9	7.72	2.96	1	0	NA	NA	NA	NA	NA	NA	NA	NA	NA	NA	NA	NA
A0A140UHW7	Cyp2b1	Cytochrome P450 2B1 OS=Rattus norvegicus OX=10116 GN=Cyp2b1 PE=1 SV=1	34	19	486	17	1	499	56.8	7.64	1134.53	19	0	363905011.6	372374148.2	552577517.9	276446348.9	643143091.4	305334383.1	202130428.2	26680279.33	220862583.1	167802597	361120189.7	431192390.7
A0A140UHW8	Mbl2	Uncharacterized protein OS=Rattus norvegicus OX=10116 PE=4 SV=1	10	3	5	3	1	371	39.9	5.85	13.62	3	0	1555849.734	1911867.375	2098372.379	1963167.479	1452770.417	2095975.534	561967.7509	17866791.35	1162610.111	445858.3117	716556.0422	1997249.685
A0A140UHX0	Prkcd	Protein kinase C delta type OS=Rattus norvegicus OX=10116 GN=Prkcd PE=1 SV=1	27	17	158	16	1	673	77.5	7.83	337.86	17	1	47771790.89	46189179.27	49619951.02	42615532.45	46800124.54	45261474.57	57643712.15	8340699.86	52189328.39	34922318.59	47736543.95	56194849.89
A0A140UHX6	Sptb	Spectrin beta chain OS=Rattus norvegicus OX=10116 GN=Sptb PE=1 SV=1	48	90	1220	84	1	2329	267.9	5.45	3140.08	90	0	353415647.1	432250054.5	277705661.2	184606060.6	754118162.6	761401085.9	277307058	78586301.96	156971141.6	141736571.8	187136348.8	222972730.8
A0A140UHX9	Ccz1b	CCZ1 homolog B, vacuolar protein-trafficking and biogenesis-associated OS=Rattus norvegicus OX=10116 GN=Ccz1b PE=1 SV=1	13	5	33	5	1	480	55.6	6.02	78.85	5	0	3276242.96	4426937.938	4472677.998	4839243.746	5222892.53	4835390.243	2783945.626	1595506.57	3460656.424	3745735.124	2882707.543	3131236.906
A0A140UHY3	Ewsr1	RNA-binding protein EWS-like OS=Rattus norvegicus OX=10116 GN=Ewsr1 PE=1 SV=1	5	2	3	2	1	661	68.9	9.29	6.41	2	0	NA	NA	NA	NA	NA	NA	NA	NA	NA	NA	NA	NA
A0A142BM04	#N/A	Anti-F4/80 kappa light chain variable region (Fragment) OS=Rattus norvegicus OX=10116 PE=2 SV=1	16	4	81	1	1	203	22.3	5.6	241.03	4	1	316400.4186	220872.3281	NA	NA	122414.2322	131462.6715	8262443.076	275079.185	728578.883	8919824.325	721553.5329	656722.3386
A0A146J2K6	Nebl	Lasp-2 OS=Rattus norvegicus OX=10116 GN=Nebl PE=2 SV=1	36	10	69	9	1	270	31.1	8.31	175.56	10	1	24602452.65	19968805.69	26931004.73	22394135.99	24385204.85	20264864.62	29404012.84	1747891.677	28665473.97	11542847.8	12453225.85	27321745.87
A0A1B0GWM3	Lama3	Uncharacterized protein (Fragment) OS=Rattus norvegicus OX=10116 PE=4 SV=1	6	9	17	7	1	2108	230.7	6.13	37.54	9	2	5931389.774	5668497.891	11695660.13	9825428.184	8402753.073	11380876.83	6901996.925	5304899.181	7335173.08	9707794.482	6320458.172	4167774.164
A0A1B0GWQ7	Tsn	Translin OS=Rattus norvegicus OX=10116 GN=Tsn PE=1 SV=1	16	4	31	4	1	282	31.9	9.2	78.86	4	0	3210738.769	4185902.234	2928267.353	2739371.925	4958194.768	3259212.766	3536946.827	4351472.424	7310359.805	4315035.69	6579486.221	6166037.536
A0A1B0GWS0	Ppfia1	PTPRF-interacting protein alpha 1 OS=Rattus norvegicus OX=10116 GN=Ppfia1 PE=1 SV=1	6	6	18	6	1	1266	142.5	6.25	41.87	6	0	2461217.534	2305651.641	1025361.168	1538234.52	2224993.178	1314141.422	6038740.576	4198541.287	4757768.372	3157248.077	2882777.609	2134077.37
A0A1B0GWU6	Ccdc170	Coiled-coil domain-containing 170 OS=Rattus norvegicus OX=10116 GN=Ccdc170 PE=4 SV=1	4	2	7	2	1	718	81.6	6.27	19.58	2	0	429566.0745	72312.57031	1284907.936	1075364.95	55438.24549	497249.8701	1326374.187	NA	538168.3108	720637.0429	621634.1038	319048.8186
A0A1B0GWW0	Ube3c	Ubiquitin protein ligase E3C (Fragment) OS=Rattus norvegicus OX=10116 GN=Ube3c PE=1 SV=1	5	4	14	4	1	962	110.4	6.68	20.85	4	0	166247.5962	228023.1719	341136.2261	484682.0945	1064224.771	582148.2949	464439.0452	2287923.371	1105537.437	1045759.113	1109689.149	1821888.571
A0A1K0FUA6	LOC689064	Globin a2 OS=Rattus norvegicus OX=10116 GN=LOC689064 PE=3 SV=1	78	16	1138	3	1	147	16	8.79	2893.48	16	1	3051719408	1655022976	1573391629	2614117721	1259557991	1571904682	1461205450	611269086.7	2259924544	1169944694	848840086.3	1544175968
A0A1L6ZA30	#N/A	G6F-LY6G6D fusion protein OS=Rattus norvegicus OX=10116 GN=g6g-ly6g6d PE=2 SV=1	5	1	3	1	1	333	36.3	7.91	9.39	1	0	76656.24563	NA	179257.7052	117414.1123	247909.8454	1024969.426	NA	NA	NA	NA	NA	NA
A0A1S7IVG9	Vkorc1	Vitamin K epoxide reductase complex OS=Rattus norvegicus OX=10116 GN=Vkorc1 PE=2 SV=1	8	1	29	1	1	161	17.7	9.13	78.48	1	0	16671645.6	21608024	33024988.65	14713760.19	18488681.17	14885980	7928626.4	13290260.06	11891796.94	9177836.473	14634236.35	17548737.78
A0A1W2Q5Z6	Tax1bp3	Tax1-binding protein 3 OS=Rattus norvegicus OX=10116 GN=Tax1bp3 PE=1 SV=1	14	1	17	1	1	124	13.7	8.48	45.71	1	0	1033453.038	1122146.875	881233.6616	1330829.727	1224433.136	999998.8461	1244972.28	NA	1774267.484	1309998.312	1893887.646	1662307.597
A0A1W2Q627	Eif4e	Eukaryotic translation initiation factor 4E OS=Rattus norvegicus OX=10116 GN=Eif4e PE=1 SV=1	11	2	7	2	1	218	25.1	6.15	13.09	2	0	1328318.783	1067741	1124190.262	1300174.276	1347831.303	968972.118	1053648.794	2337125.306	1764978.735	1631734.795	1486919.362	1291502.863
A0A1W2Q6F8	Ndufa10l1	NADH dehydrogenase [ubiquinone] 1 alpha subcomplex subunit 10, mitochondrial OS=Rattus norvegicus OX=10116 GN=Ndufa10l1 PE=3 SV=1	39	15	121	15	1	355	40.5	7.53	310.95	15	0	27550793.35	31461357.33	65614769.16	49038359.73	32571193.08	26814727.84	12882018.35	23120864.11	5431608.975	19026558.07	13754358.28	12309799.31
A0A1W2Q6L2	Rpl13a	Predicted gene 45713 OS=Rattus norvegicus OX=10116 GN=Gm45713 PE=3 SV=1	11	5	58	5	1	444	50.6	10.07	115.38	5	0	41275655.6	13827935.81	10044773.22	6913501.005	16074162.79	13897173.43	34590322.96	168882567.7	34469888.42	7980399.719	39102223.38	50216275.22
A0A1W2Q6M9	Adamtsl1	Uncharacterized protein OS=Rattus norvegicus OX=10116 PE=4 SV=1	1	1	1	1	1	1383	151.8	7.06	2.39	1	0	NA	NA	334919.8472	NA	NA	NA	157295.2137	NA	333284.5936	1401504.865	282544.0496	NA
A0A1W2Q6Q2	Dclk1	Serine/threonine-protein kinase DCLK1 OS=Rattus norvegicus OX=10116 GN=Dclk1 PE=1 SV=1	1	1	9	1	1	739	82	8.73	14.52	1	0	608620.8455	506125.707	666275.3919	687524.0068	648086.7829	608015.8566	574016.4858	1377667.606	636972.4234	359082.7768	1685581.084	1526667.306
A0A2P1EA62	#N/A	ATP-binding cassette subfamily B member 11 OS=Rattus norvegicus OX=10116 GN=Abcb11 PE=2 SV=1	12	11	16	10	1	1321	146.2	7.4	33.06	11	1	2002057.704	4514308.422	3561888.495	2470091.378	2873163.063	4837626.182	7146575.154	10277904.23	3484289.741	3106352.737	6943062.37	9674002.219
A0A387KC71	#N/A	Aldo-keto reductase family 1, member C15 OS=Rattus norvegicus OX=10116 GN=17beta-HSD PE=2 SV=1	39	11	185	10	1	324	37.2	7.46	463.3	11	1	139713735.2	125924704.9	66762506.57	83770124.17	167261055.1	108414624	54515570.13	34423439.25	79961778.22	20905468.73	49581410.29	63598907.85
A0A3B0IYY4	#N/A	Adiponectin b OS=Rattus norvegicus OX=10116 GN=Adib PE=4 SV=1	18	4	28	4	1	268	28.2	7.8	67.36	4	0	12953779.31	3488769.219	6239177.204	1996929.649	5098941.859	2179259.629	21601067.83	6496398.922	13774270.7	4580741.023	12297081.6	24588585.7
A0A3B0J380	#N/A	Adiponectin c OS=Rattus norvegicus OX=10116 GN=Adic PE=4 SV=1	19	4	19	4	1	257	27.2	8.88	45.41	4	0	7089843.649	988719.25	1904570.452	NA	1745066.137	1303548.97	14379865.46	3118295.176	12031777.71	7568328.423	4619604.902	11216529.79
A0A4Z3	A3galt2	Alpha-1,3-galactosyltransferase 2 OS=Rattus norvegicus OX=10116 GN=A3galt2 PE=1 SV=1	4	1	1	1	1	339	39.5	8.32	0	1	0	NA	385941.75	NA	NA	228827.4544	462360.7114	NA	NA	NA	NA	311993.1728	178060.4017
A0FKI7	Acbd5	Acyl-CoA-binding domain-containing protein 5 OS=Rattus norvegicus OX=10116 GN=Acbd5 PE=1 SV=1	17	8	50	8	1	506	56.7	5.54	125.53	8	0	24835343.95	27301012.88	36674423.84	26452552.55	30394988.64	31044732.56	2235460.268	48987961.61	6367976.019	10401120.62	20270770.13	13996925.52
A0JN30	Cnpy2	Canopy 2 homolog (Zebrafish) OS=Rattus norvegicus OX=10116 GN=Cnpy2 PE=1 SV=1	61	11	163	11	1	182	20.7	5.14	412.83	11	0	57547026.74	65912215.56	71596551.87	66806859.44	78306415.93	61531096.75	59921243.9	125342430.4	33422071.86	51036899.97	71202590.9	69845413.23
A0JPJ7	Ola1	Obg-like ATPase 1 OS=Rattus norvegicus OX=10116 GN=Ola1 PE=2 SV=1	9	3	9	3	1	396	44.5	7.77	18.56	3	0	2890225.649	3082366.375	3436749.622	2361004.541	2962139.341	4120035.469	4719337.332	4566377.577	6130779.788	3539951.285	3209445.035	4148741.513
A0JPM9	Eif3j	Eukaryotic translation initiation factor 3 subunit J OS=Rattus norvegicus OX=10116 GN=Eif3j PE=1 SV=1	24	5	33	5	1	259	29.2	4.81	76.74	5	0	15918387.36	4180044.031	5509366.535	6548983.402	3995866.612	4461865.866	23088628.29	9210815.166	10013135.85	3424880.316	1093705.482	7356594.491
A0JPN0	Rad18	RAD18 E3 ubiquitin protein ligase OS=Rattus norvegicus OX=10116 GN=Rad18 PE=1 SV=1	1	1	4	1	1	494	56	8.18	5.93	1	0	30158973.81	9337349	51998200.81	5944682.621	29601017.31	25337003.11	17782370.59	6713458.694	11252143.33	2928787.924	13976881.65	19645992.14
A0JPQ8	Agmo	Alkylglycerol monooxygenase OS=Rattus norvegicus OX=10116 GN=Agmo PE=2 SV=1	16	6	16	6	1	447	51.7	7.62	35.43	6	0	NA	218580.3203	74028.34934	38111.37459	NA	NA	NA	46456306.82	105808.2954	NA	271606.3888	140724.734
A0MZ67	Shtn1	Shootin-1 OS=Rattus norvegicus OX=10116 GN=Shtn1 PE=1 SV=1	3	2	2	2	1	633	71.4	5.44	4.51	2	0	164091.5157	286279.2813	129775.3625	NA	218946.5524	165293.7714	786128.8363	846889.3728	643859.6183	746661.303	182932.6234	NA
A1A5L1	Blmh	Bleomycin hydrolase OS=Rattus norvegicus OX=10116 GN=Blmh PE=1 SV=1	28	9	48	9	1	455	52.4	6.38	117.39	9	0	5138982.825	4816886.125	1982010.374	3064431.843	7022279.926	3094659.046	12161239.1	2016680.109	10071231.75	2182195.008	6006696.677	6371855.017
A1A5L2	Pgm1	Pgm1 protein (Fragment) OS=Rattus norvegicus OX=10116 GN=Pgm1 PE=2 SV=1	16	7	17	7	1	583	63.3	6.4	40.9	7	0	2683271.38	2798383.563	3299354.751	3225658.926	2590494.393	2204083.485	1928750.063	14704167.07	3347698.91	2611374.453	1737636.082	1456390.706
A1A5P0	Cdc42ep1	Cdc42 effector protein 1 OS=Rattus norvegicus OX=10116 GN=Cdc42ep1 PE=1 SV=1	25	7	53	7	1	388	41	7.36	126.18	7	0	13274120.59	8192009.625	10565900.81	8684176.6	10973062.95	8733130.696	12084053.64	1220700.552	2698091.266	2947162.685	3276767.212	4992062.884
A1A5Q1	Parp9	Poly [ADP-ribose] polymerase OS=Rattus norvegicus OX=10116 GN=Parp9 PE=1 SV=1	25	15	80	15	1	830	92.2	6.93	195.59	15	0	13448655.37	13258764.86	12532944.73	8884402.838	11914455.35	13555728.85	11877658.09	8527699.046	11873025.68	11548460.48	17434177.64	20994489.82
A1A5R2	Gprc5a	G protein-coupled receptor, class C, group 5, member A OS=Rattus norvegicus OX=10116 GN=Gprc5a PE=1 SV=1	17	6	264	6	1	358	40.4	8.28	766.7	6	0	118291647.7	147528195.5	64109696.98	68508988.5	67239273.92	114620922.4	124845039.8	4631311.029	210048269.9	88125221.03	143593055.4	135764146.4
A1A5R3	Krr1	KRR1 small subunit processome component OS=Rattus norvegicus OX=10116 GN=Krr1 PE=1 SV=1	4	1	1	1	1	380	43.6	9.85	2.11	1	0	NA	NA	NA	NA	NA	NA	NA	NA	NA	NA	NA	NA
A1A5R4	Acot5	Acyl-CoA thioesterase 5 OS=Rattus norvegicus OX=10116 GN=Acot5 PE=1 SV=1	5	2	19	1	1	421	46.6	6.73	42.64	2	0	413879.9177	187195.5	659440.4853	389564.6888	163920.4602	237785.0276	NA	NA	630375.5117	NA	650401.836	NA
A1EC97	Dusp14	Dual specificity phosphate 14 OS=Rattus norvegicus OX=10116 GN=Dusp14 PE=2 SV=1	6	1	1	1	1	198	22.3	9.54	1.92	1	0	242272.8747	366133.9688	NA	305274.804	291169.7466	286621.679	356412.6232	211292.6117	NA	812485.3894	NA	389110.7268
A1KXK4	Dhcr24	3-beta-hydroxysterol delta 24 reductase OS=Rattus norvegicus OX=10116 GN=Dhcr24 PE=2 SV=1	5	3	4	3	1	516	60	7.94	11.71	3	0	969322.9894	677791.625	152550.3381	814759.5116	723537.0596	557466.7243	557277.948	9897618.264	454177.81	694696.0621	1240461.116	1166878.618
A1L108	Arpc5l	Actin-related protein 2/3 complex subunit 5-like protein OS=Rattus norvegicus OX=10116 GN=Arpc5l PE=1 SV=2	16	2	12	2	1	153	17	6.8	25.11	2	0	2030787.711	1354093.875	1567947.869	3085773.838	2717389.954	2875296.437	5173782.445	5796714.598	7178809.934	3188120.669	8017764.188	6063716.055
A1L122	Nae1	NEDD8-activating enzyme E1 regulatory subunit OS=Rattus norvegicus OX=10116 GN=Nae1 PE=2 SV=1	3	1	2	1	1	534	60.3	5.66	3.81	1	0	NA	988435.1875	NA	742765.785	1644681.434	884386.9944	543239.5907	81711.16115	819992.1696	236778.7306	NA	NA
A1L128	Adh4	Alcohol dehydrogenase 4 (Class II), pi polypeptide OS=Rattus norvegicus OX=10116 GN=Adh4 PE=1 SV=1	35	9	12	9	1	377	40.2	7.85	31.31	9	0	118430.1138	145512.2227	5057890.624	2855443.141	432625.1766	1079639.711	88456.06579	23968835	173864.5281	881061.1463	73074.07068	419289.2895
A1L134	Aup1	Ancient ubiquitous protein 1 OS=Rattus norvegicus OX=10116 GN=Aup1 PE=2 SV=1	15	5	33	5	1	410	46.2	8.4	83.86	5	0	7426697.149	6916204.688	6884586.142	3546474.382	6626201.797	8836725.304	4393179.983	7677138.241	7654316.354	6822067.768	5452835.242	6564714.309
A1L1I1	Zdhhc9	Palmitoyltransferase OS=Rattus norvegicus OX=10116 GN=Zdhhc9 PE=2 SV=1	4	1	2	1	1	364	40.9	7.84	4.27	1	0	NA	148235.4219	NA	NA	231818.5938	NA	NA	NA	NA	NA	NA	NA
A1L1I2	Gpr182	G-protein coupled receptor 182 OS=Rattus norvegicus OX=10116 GN=Gpr182 PE=1 SV=1	7	2	8	2	1	398	45.2	7.93	21.84	2	0	1073382.714	1327198.125	1141593.132	724169.8297	1622258.826	860048.5002	200589.3473	762972.0189	215534.1424	308785.4332	288672.9685	264410.0424
A1L1I6	Rtn3	Reticulon OS=Rattus norvegicus OX=10116 GN=Rtn3 PE=2 SV=1	14	4	80	3	1	262	28.3	9.19	175.23	4	1	104826912.8	108140507.5	95851942.99	66219315.92	116362190.5	95584731.23	37875391.47	21996558.67	109100452.8	78680089.8	94601713.4	132240367.1
A1L1J8	Rab5b	RAB5B, member RAS oncogene family OS=Rattus norvegicus OX=10116 GN=Rab5b PE=1 SV=1	48	8	243	5	1	215	23.7	8.13	608.24	8	0	34310446.82	36417554.49	45395530.11	28977056.09	45768477.41	30322035.74	31812923.89	16918272.81	38211083.8	27758584.92	37443508.9	44474878.27
A1L1J9	Lmf2	Lipase maturation factor 2 OS=Rattus norvegicus OX=10116 GN=Lmf2 PE=2 SV=1	14	7	59	7	1	702	80.2	10.02	131.01	7	0	26173291.57	31244068	47236301.23	27592842.05	34189951.92	38663595.33	14117704.99	13209158.85	15642593.57	21307357.34	24171899.57	22846085.01
A1L1K8	Habp4	Intracellular hyaluronan-binding protein 4 OS=Rattus norvegicus OX=10116 GN=Habp4 PE=1 SV=1	4	1	1	1	1	411	45.8	6.84	2.55	1	0	52120.63548	NA	NA	10683.90796	NA	NA	103031.0574	144898.384	81817.28065	NA	NA	82541.54141
A1L1L2	Tmem214	Transmembrane protein 214 OS=Rattus norvegicus OX=10116 GN=Tmem214 PE=2 SV=1	19	11	56	11	1	685	76.5	9.03	156.35	11	0	15973850.67	16422459.34	20895303.04	16970028.89	18425714.02	14919726.33	8367657.132	26536115.89	5949704.987	9092558.257	20689268.82	13332803.6
A1L1L9	Tmem65	RGD1563224 protein OS=Rattus norvegicus OX=10116 GN=Tmem65 PE=2 SV=1	16	4	49	4	1	261	27.9	8.1	105.52	4	0	6003185.612	8614871.5	11946760.86	11456904.51	10329971.04	7976496.598	3511943.511	664112.5672	3403094.267	6773968.044	12336995.12	8810515.728
A1L1M0	Prkaca	Protein kinase, cAMP-dependent, catalytic, alpha OS=Rattus norvegicus OX=10116 GN=Prkaca PE=1 SV=1	31	13	118	4	1	351	40.6	8.79	231.35	13	9	43233396.47	43251996.3	35569261.27	37337703.64	56007783.96	43724356.52	51286950.8	16997752.42	47430855.86	35433193.95	43086604.95	42607089.23
A1XF83	Ugt2b	UDP-glucuronosyltransferase OS=Rattus norvegicus OX=10116 GN=Ugt2b PE=2 SV=1	34	15	79	3	1	530	60.9	8.5	201.09	15	11	912496.7896	157425.7969	1396598.059	2803783.037	640669.7284	309085.2006	1917038.359	928706376.9	1469102.93	1529394.614	1656692.846	1193968.831
A1YR15	#N/A	Retinal dehydrogenase/reductase family member 3 OS=Rattus norvegicus OX=10116 PE=2 SV=1	5	1	1	1	1	302	33.6	8.69	2.92	1	0	NA	115525.5234	NA	NA	137506.3183	NA	NA	380269.8279	NA	NA	NA	NA
A2IBE0	Car14	Carbonic anhydrase 14 OS=Rattus norvegicus OX=10116 GN=Car14 PE=1 SV=1	10	2	2	2	1	337	37.5	6.42	5.19	2	0	NA	75098.46094	201024.7523	249318.4661	NA	86187.21762	NA	4108791.088	NA	100300.3906	28933.85822	NA
A2RRT9	Cyp4v3	Cytochrome P450 4V2 OS=Rattus norvegicus OX=10116 GN=Cyp4v2 PE=2 SV=1	18	9	50	9	1	525	60.5	8.35	99.74	9	0	17003609.19	16510527.66	16736379.43	13397546.63	17409129.37	15112408.35	9709472.57	17401276.18	3268976.667	3161168.203	10809743.78	12130467.2
A2RRU1	Gys1	Glycogen [starch] synthase, muscle OS=Rattus norvegicus OX=10116 GN=Gys1 PE=1 SV=1	8	5	11	4	1	738	84	6.18	17.31	5	0	1387709.016	1595378.219	1281869.103	1262205.928	1602884.19	1274068.41	1379455.384	1373597.862	2964704.2	414211.9028	2210947.329	2840596.884
A2RUV9	Aebp1	Adipocyte enhancer-binding protein 1 OS=Rattus norvegicus OX=10116 GN=Aebp1 PE=2 SV=1	15	12	64	12	1	1128	128	5.2	164.6	12	0	4949755.344	2556178.984	5210318.634	5317479.99	6576231.454	3145294.006	7711017.614	NA	12406842.74	12743127.23	12633368.93	11855924.91
A2RUW1	Tollip	Toll-interacting protein OS=Rattus norvegicus OX=10116 GN=Tollip PE=1 SV=1	34	6	40	6	1	274	30.3	5.17	92.56	6	0	4433735.087	4347787.703	4136403.751	6049834.923	6344912.97	3350065.044	6394089.468	4063961.703	6561289.807	3616042.004	5714939.619	5595306.261
A2VCW8	7-Sep	Septin 7 OS=Rattus norvegicus OX=10116 GN=Sept7 PE=2 SV=1	41	17	245	1	1	437	50.6	8.57	579.85	17	0	NA	NA	NA	NA	NA	NA	NA	NA	NA	NA	NA	NA
A2VCW9	Aass	Alpha-aminoadipic semialdehyde synthase, mitochondrial OS=Rattus norvegicus OX=10116 GN=Aass PE=2 SV=1	17	13	15	13	1	926	102.8	6.92	37.27	13	0	596717.2178	842377.2031	1903244.901	1395337.087	1424053.752	784020.9098	2656324.871	38230278.42	2094556.434	931992.1887	2210565.166	2354862.65
A2VD07	Cyp4f5	Cytochrome P450 4F5 OS=Rattus norvegicus OX=10116 GN=Cyp4f5 PE=2 SV=1	14	6	11	2	1	526	60.7	7.14	22.33	6	0	NA	292525.8125	244044.4982	357874.4473	NA	289573.0053	732589.4859	224982.4426	564321.059	302892.7709	588202.9464	1542307.021
A2VD09	Abi1	Abi1 protein OS=Rattus norvegicus OX=10116 GN=Abi1 PE=1 SV=1	17	9	60	9	1	481	52.3	7.64	150.58	9	0	22809467.72	17371548.28	14544030.88	13856738.21	19091098.03	16040384.9	22113171.81	4917453.817	15278497.64	5335569.536	15729320.99	25871036.88
A2VD12	Pbxip1	Pre-B-cell leukemia transcription factor-interacting protein 1 OS=Rattus norvegicus OX=10116 GN=Pbxip1 PE=1 SV=1	20	11	101	11	1	722	80.2	5.41	239.14	11	0	19447527.39	14554185.27	13407698.9	8367297.104	13590541.08	14080404.2	18289327.16	4925681.183	10877737.89	6590551.375	16040927.25	15234917.57
A3KN98	Bco2	Bco2 protein OS=Rattus norvegicus OX=10116 GN=Bco2 PE=1 SV=1	3	1	1	1	1	532	60.2	6.6	2.17	1	0	NA	NA	NA	NA	NA	NA	NA	1341489.542	NA	NA	NA	NA
A3RLA8	Fcgr2b	Fc fragment of IgG receptor IIb OS=Rattus norvegicus OX=10116 GN=Fcgr2b PE=1 SV=1	4	1	2	1	1	342	38	6.83	5.81	1	0	121685.3024	NA	190605.4495	NA	NA	333146.6504	NA	1588453.56	588089.2769	638586.7646	343024.0561	NA
A4D0F6	#N/A	Ac2-059 OS=Rattus norvegicus OX=10116 PE=2 SV=1	2	2	5	1	1	1552	173.1	6.27	6.49	2	0	NA	NA	NA	NA	NA	NA	NA	NA	181696.7189	175031.7108	NA	NA
A4GW50	Stk38l	Non-specific serine/threonine protein kinase OS=Rattus norvegicus OX=10116 GN=Stk38l PE=1 SV=1	7	3	8	2	1	464	53.7	6.96	14.54	3	0	941853.9033	1876721.047	2326341.029	1506651.491	2136671.778	2767100.006	1586258.336	426964.5231	766299.6586	987831.4313	1388154.264	1930894.465
A4LA56	Chi3l1	Chitinase 3-like 1 protein (Fragment) OS=Rattus norvegicus OX=10116 GN=Chi3l1 PE=2 SV=1	28	7	29	7	1	362	40.3	8.85	68.34	7	0	10065144.61	8857899.563	14127301.49	10511237.33	11933039.79	12080335.65	10802381.86	72440.43437	10667332.91	10651363.67	7433484.111	9739936.987
A4PB92	Glyat	Glycine N-acyltransferase OS=Rattus norvegicus OX=10116 GN=Glyat PE=2 SV=1	25	5	10	5	1	296	33.9	8.63	28.78	5	0	NA	NA	NA	NA	95284.83478	542183.056	NA	9935995.1	NA	NA	NA	NA
A5H2Z9	Tlr7	Toll-like receptor 7 OS=Rattus norvegicus OX=10116 GN=Tlr7 PE=2 SV=1	1	1	1	1	1	1050	121.2	6.84	0	1	0	NA	NA	75350.76864	NA	NA	44155.80227	NA	NA	151402.7761	190919.042	240561.3038	165915.0564
A6N6J5	Wdr35	WD repeat-containing protein 35 OS=Rattus norvegicus OX=10116 GN=Wdr35 PE=1 SV=1	4	3	3	3	1	1170	132.7	6.73	7.64	3	0	124668.253	NA	NA	NA	158232.9695	NA	898180.3155	1207557.125	1238349.212	58538.80224	1344335.436	298930.6082
A6Y7S3	Kctd8	Potassium channel tetramerisation domain containing 8 (Predicted) OS=Rattus norvegicus OX=10116 GN=Kctd8 PE=2 SV=1	2	1	10	1	1	476	52.8	8.27	23.48	1	0	4878093.875	9002008	3867264.761	4689350.258	6216325.114	4144999.534	2050390.336	948313.0436	7271963.785	3446829.92	11122854.09	8386564.942
A7BFV9	#N/A	Epidermal growth factor receptor pathway substrate 15 OS=Rattus norvegicus OX=10116 PE=1 SV=1	26	17	89	17	1	897	98.6	4.61	197.52	17	0	9733069.082	7725571.375	7815156.099	7528668.841	10954733.54	6746654.051	18474593.61	1937168.379	18125289.39	9474853.456	11583188.13	15614973.05
A7VJC2	Hnrnpa2b1	Heterogeneous nuclear ribonucleoproteins A2/B1 OS=Rattus norvegicus OX=10116 GN=Hnrnpa2b1 PE=1 SV=1	43	14	203	12	1	353	37.5	8.95	467.01	14	2	51100273.82	42487481.86	17515101.6	23022891.2	49297354.44	53329056.69	55601591.06	76454783.44	59344733.08	50090875.38	67860574.52	39716741.7
A7XYB9	#N/A	NADH-ubiquinone oxidoreductase chain 4 OS=Rattus norvegicus OX=10116 GN=Nd4 PE=3 SV=1	6	2	36	2	1	459	51.7	9.41	85.43	2	0	4100454.568	4458026.313	6874733.768	8599733.661	6179734.298	5277274.96	905865.3444	4174291.308	1319097.771	6667404.683	3778084.615	2898899.463
A8IRI3	#N/A	Glucocorticoid receptor OS=Rattus norvegicus OX=10116 GN=gr PE=2 SV=1	20	10	20	1	1	794	87.5	6.79	48.84	10	0	NA	NA	NA	NA	NA	NA	NA	NA	NA	NA	NA	NA
A8QIC3	Dnajc9	DnaJ (Hsp40) homolog, subfamily C, member 9 (Predicted) OS=Rattus norvegicus OX=10116 GN=Dnajc9 PE=1 SV=1	4	1	1	1	1	259	30	7.33	2.22	1	0	NA	NA	NA	NA	NA	NA	NA	NA	NA	NA	NA	NA
A8WCF8	Tprg1l	Tumor protein p63-regulated gene 1-like protein OS=Rattus norvegicus OX=10116 GN=Tprg1l PE=1 SV=1	5	1	3	1	1	266	29.8	7.37	5.7	1	0	NA	NA	1402384.016	1556206.819	438562.364	NA	441056.8513	301371.7463	825731.3144	384474.63	NA	NA
A9CMA6	Tmem163	Transmembrane protein 163 OS=Rattus norvegicus OX=10116 GN=Tmem163 PE=1 SV=1	5	1	4	1	1	288	31.3	8.29	6.71	1	0	174565.7003	401024.1563	1212563.873	651687.36	226418.1955	NA	NA	NA	NA	NA	266575.0675	817281.7261
A9CMB8	Mcm6	DNA helicase OS=Rattus norvegicus OX=10116 GN=Mcm6 PE=1 SV=1	2	1	3	1	1	821	92.8	5.43	8.04	1	0	190075.1897	NA	NA	NA	221538.6352	NA	464568.001	NA	417870.3666	306112.9566	NA	273058.8861
A9EEP5	Aldh1a3	Aldehyde dehydrogenase family 1 subfamily A3 OS=Rattus norvegicus OX=10116 GN=Aldh1a3 PE=2 SV=1	14	6	24	5	1	512	56.2	6.57	59.39	6	0	2919047.872	1979685.859	4495479.555	4640036.347	3701448.103	4780529.476	3441490.106	477280.2221	1647751.274	2050145.803	4891682.438	6907217.579
A9LNM8	Prkg1	cGMP-dependent protein kinase OS=Rattus norvegicus OX=10116 GN=Pkg PE=2 SV=1	18	9	31	9	1	671	76.3	5.87	65.91	9	0	879583.3834	2109915.662	1701202.375	1259862.454	2345272.664	3174317.332	6113462.363	474719.9214	7948132.889	3960522.839	5576006.953	6481281.324
A9UMV9	Ndufa7	NADH:ubiquinone oxidoreductase subunit A7 OS=Rattus norvegicus OX=10116 GN=Ndufa7 PE=1 SV=1	20	2	7	2	1	112	12.5	10.48	16.59	2	0	5794249.765	1802329.5	23249585.4	14213904.01	3190193.554	3692126.131	1307672.929	823793.6405	593824.9997	398803.5055	170274.0414	967569.1371
A9UMW1	Gsta4	Glutathione S-transferase alpha 4 OS=Rattus norvegicus OX=10116 GN=Gsta4 PE=2 SV=1	27	8	98	6	1	222	25.5	7.33	171.29	8	0	34240275.95	38154007.06	31122307.03	30455935.4	36941552.38	20775923.77	24553414.16	12539529.55	20751645.73	2961399.061	19575624.21	20253410.79
B0BMS8	Myl9	Myl9 protein OS=Rattus norvegicus OX=10116 GN=Myl9 PE=1 SV=1	62	8	182	3	1	172	19.8	4.92	498.37	8	0	2832885.341	2934053.891	1946820.293	3287788.707	4918627.849	3801306.205	8540697.818	1466607.693	7277185.381	10158731.46	5376795.282	5066165.897
B0BMT9	Sqrdl	Sqrdl protein OS=Rattus norvegicus OX=10116 GN=Sqor PE=1 SV=1	43	21	375	21	1	450	50.2	9.07	1007.15	21	0	133596637.3	173251395.5	249500549.6	204400410.8	175357080.1	137750706.2	139471988	12870373.7	66607597.97	148124499	158310321.9	110213548.7
B0BMV4	Yif1a	Yip1 interacting factor homolog (S. cerevisiae) OS=Rattus norvegicus OX=10116 GN=Yif1a PE=1 SV=1	5	1	7	1	1	293	32	9.09	19.1	1	0	33340999.53	63494002.5	76752215.45	58974409.71	44608602.09	74067252.4	50771022.33	13224779.45	42320295.76	26335640.41	24290224.96	27629012.1
B0BMW0	Rab14	RAB14, member RAS oncogene family OS=Rattus norvegicus OX=10116 GN=Rab14 PE=1 SV=1	86	17	387	15	1	215	23.9	6.21	1055.92	17	2	254086767.8	217734981.6	239778053.6	202188818.8	287110638.5	210801669.2	172194906.2	94184323.11	227263709.3	127243629.9	177822181.6	267293295.4
B0BMW2	Hsd17b10	3-hydroxyacyl-CoA dehydrogenase type-2 OS=Rattus norvegicus OX=10116 GN=Hsd17b10 PE=1 SV=1	68	16	256	16	1	261	27.2	8.59	670.12	16	0	51833056.46	83499709.77	116596738.5	114757577.9	98540728.82	75928503.15	52877749.18	216587980.6	42745878.49	122721564.2	59533696.99	49728796.35
B0BMW4	Gnas	GNAS complex locus OS=Rattus norvegicus OX=10116 GN=Gnas PE=2 SV=1	29	10	225	9	1	394	45.6	5.96	541.7	10	0	40045521.33	54997684.55	45292695.38	42578322.99	55419166.35	47476702.73	29375893.53	16842753.63	47342397.06	35950954.53	44621455.33	48797912.13
B0BMX3	S100a16	S100 calcium binding protein A16 (Predicted), isoform CRA_a OS=Rattus norvegicus OX=10116 GN=S100a16 PE=1 SV=1	28	3	9	3	1	123	14.2	5.52	23.28	3	0	7346598.54	9509570.469	8540405.736	5770346.496	8100974.026	7927562.657	10296741.42	NA	11720673.33	6532082.31	8976450.54	7398345.603
B0BMY6	Otulin	LOC64038 protein OS=Rattus norvegicus OX=10116 GN=Otulin PE=1 SV=1	3	1	1	1	1	353	40.4	5.39	2.52	1	0	517641.8658	1173259.25	NA	662616.5589	NA	NA	NA	658822.7752	228933.3747	NA	NA	NA
B0BMY7	Twf2	Protein tyrosine kinase 9-like (A6-related protein) (Predicted), isoform CRA_b OS=Rattus norvegicus OX=10116 GN=Twf2 PE=1 SV=1	28	6	32	6	1	349	39.4	6.8	85.41	6	0	2939905.54	1415556.064	3797097.432	4012558.259	4560052.424	3055695.716	2972022.135	460958.3176	3553751.228	2963656.362	3760886.419	3208425.744
B0BMZ1	RGD1305587	Family with sequence similarity 241 member B OS=Rattus norvegicus OX=10116 GN=Fam241b PE=1 SV=1	27	2	73	2	1	120	13.2	11.41	199.06	2	0	4148753.047	4193691.594	4201106.925	2549982.16	3874828.272	5232514.226	3171748.926	7810056.597	3670693.086	3606831.01	4286711.22	5420604.539
B0BN06	Bcas3	Bcas3 protein (Fragment) OS=Rattus norvegicus OX=10116 GN=Bcas3 PE=2 SV=1	8	2	4	2	1	475	52.2	6.95	10.02	2	0	57036.94916	81063.5625	NA	57924.71094	NA	NA	327893.5494	NA	269887.9989	144019.2364	NA	386627.1973
B0BN18	Pfdn2	Prefoldin subunit 2 OS=Rattus norvegicus OX=10116 GN=Pfdn2 PE=2 SV=1	24	3	21	3	1	154	16.6	6.58	61.46	3	0	3197895.366	3637958.656	2295190.526	2283663.535	4764051.725	2670681.872	6873124.861	2317087.207	4857054.075	2834197.772	4925161.939	4074289.376
B0BN19	Rab22a	RAB22A, member RAS oncogene family OS=Rattus norvegicus OX=10116 GN=Rab22a PE=1 SV=1	45	7	58	5	1	194	21.8	8.15	153.27	7	2	24531491.57	21586144.89	21492375.17	16303580.16	23841179.28	22603138.94	14832064	9798410.337	19803886.17	15005001.41	17245389.42	18593712.24
B0BN20	Tspan6	Tetraspanin OS=Rattus norvegicus OX=10116 GN=Tspan6 PE=1 SV=1	19	4	29	4	1	245	27.5	8.1	73.28	4	0	13201062.3	14210279	16545347.39	11617977.74	7218311.474	15004511.95	1638503.601	967320.9031	15187541.02	10863815.39	15472247.79	13562298.58
B0BN23	Tspan15	Tetraspanin OS=Rattus norvegicus OX=10116 GN=Tspan15 PE=2 SV=1	19	4	38	4	1	294	32.9	5.68	71.76	4	0	3840247.242	4650571.031	4617815.588	2848984.611	4720844.935	3739813.309	2167624.761	134428.9621	6903674.177	3019309.391	5288766.752	5325458.943
B0BN30	Mtch1	Mitochondrial carrier 1 OS=Rattus norvegicus OX=10116 GN=Mtch1 PE=1 SV=1	16	6	42	6	1	389	41.6	9.32	78.84	6	0	17753532.26	18115517.03	26043726.97	25445047.73	23425683.96	17984814.16	6227534.301	18389024.45	13502555.07	11316160.61	17771309.93	14132075.86
B0BN33	#N/A	Uncharacterized protein (Fragment) OS=Rattus norvegicus OX=10116 PE=2 SV=1	7	2	2	2	1	288	30.5	5.21	3.96	2	0	264933.4512	NA	1060362.286	849614.4229	1295718.518	NA	328204.6336	2413176.934	1582964.262	NA	119069.4889	216191.7646
B0BN41	RGD1565410	RGD1565410 protein OS=Rattus norvegicus OX=10116 GN=RGD1565410 PE=2 SV=1	16	2	52	1	1	134	14	7.87	112.06	2	1	19131184.31	16558355.5	7670460.874	16605154.9	16193655.19	38521886.89	14485930.63	1355705.792	51063501.64	65026951.02	67044820.63	26185281
B0BN43	Was	Was protein OS=Rattus norvegicus OX=10116 GN=Was PE=2 SV=1	3	1	1	1	1	503	53.1	6.7	3.04	1	0	NA	NA	NA	NA	NA	NA	NA	NA	NA	NA	NA	NA
B0BN46	Grhpr	Glyoxylate and hydroxypyruvate reductase OS=Rattus norvegicus OX=10116 GN=Grhpr PE=1 SV=1	24	6	9	6	1	335	35.9	7.93	20.37	6	0	894831.6025	1586041.188	1844545.933	1727264.663	1241588.46	1725718.769	1215934.591	23091360.22	991084.2741	927868.4718	1088110.493	412728.8383
B0BN55	Urod	Uroporphyrinogen decarboxylase OS=Rattus norvegicus OX=10116 GN=Urod PE=1 SV=1	4	1	4	1	1	367	40.6	6.54	10.41	1	0	NA	NA	211471.6918	NA	NA	NA	NA	563729.0917	578137.3376	340097.5731	NA	390946.902
B0BN63	Ahsa1	Activator of Hsp90 ATPase activity 1 OS=Rattus norvegicus OX=10116 GN=Ahsa1 PE=1 SV=1	22	5	21	5	1	338	38.1	5.53	53.49	5	0	1784744.518	1952708.57	1899503.038	1687610.056	3549421.037	2210061.311	1991620.714	1671232.319	2676902.452	1920845.754	2605633.22	3325028.827
B0BN65	Fam49a	Family with sequence similarity 49, member A OS=Rattus norvegicus OX=10116 GN=Fam49a PE=1 SV=1	20	5	30	4	1	323	37.3	6.01	68.81	5	0	2686283.156	2724573.031	1988810.098	1513090.532	3801658.621	1762420.115	1765900.327	458389.1696	1884447.912	1799066.934	919700.6183	3410885.219
B0BN68	Mrps9	Mitochondrial ribosomal protein S9 OS=Rattus norvegicus OX=10116 GN=Mrps9 PE=1 SV=1	15	5	15	5	1	390	45	9.11	38.19	5	0	1268264.79	1242043.813	3935949.024	3350115.136	1705752.413	1909905.344	1346809.602	1069772.105	303751.6824	2367289.063	1090041.109	447576.2996
B0BN70	Smim7	Small integral membrane protein 7 OS=Rattus norvegicus OX=10116 GN=Smim7 PE=3 SV=1	13	1	2	1	1	75	8.6	8.18	4.42	1	0	1533194.669	814303.0625	2958414.463	1890802.571	1736703.091	2024866.307	NA	NA	NA	1755379.925	1343296.602	1473858.509
B0BN81	Rps5	40S ribosomal protein S5 OS=Rattus norvegicus OX=10116 GN=Rps5 PE=1 SV=1	28	9	120	9	1	204	22.9	9.72	301.24	9	0	93069867.75	55181739.58	33537213.63	47597332.42	57632596.48	39134531.65	116754805.9	273937090.8	97104762.52	30982078.91	100543401.4	146301642.5
B0BN83	Armc1	Armadillo repeat-containing protein 1 OS=Rattus norvegicus OX=10116 GN=Armc1 PE=1 SV=1	4	1	4	1	1	282	31.2	5.57	8.12	1	0	NA	NA	NA	NA	NA	NA	NA	NA	NA	NA	NA	NA
B0BN85	Sugt1	Protein SGT1 homolog OS=Rattus norvegicus OX=10116 GN=Sugt1 PE=2 SV=1	18	4	14	4	1	336	38.1	5.29	31.78	4	0	1003293.572	1145989.688	1236962.008	1820026.797	1058703.686	915929.8913	1298621.582	637989.6017	995385.6337	2576938.243	3141589.136	870796.7948
B0BN86	Tmem11	Transmembrane protein 11, mitochondrial OS=Rattus norvegicus OX=10116 GN=Tmem11 PE=2 SV=1	18	3	20	3	1	190	21.3	7.36	31.11	3	0	5719482.41	6472862.563	11103094.62	7053926.829	7297845.48	6554308.325	4178075.546	3924945.701	3812009.288	2886250.308	7601609.058	4941473.622
B0BN93	Psmd13	26S proteasome non-ATPase regulatory subunit 13 OS=Rattus norvegicus OX=10116 GN=Psmd13 PE=1 SV=1	47	15	77	15	1	376	42.8	5.83	177.31	15	0	7927023.32	11271669.73	9261443.417	7315197.407	22233634.48	10421349.28	18752858.82	39327672.52	40307973.38	15066950.66	30189710.2	27637097.53
B0BN94	Fam136a	Protein FAM136A OS=Rattus norvegicus OX=10116 GN=Fam136a PE=1 SV=1	42	4	26	4	1	138	15.6	7.61	76.59	4	0	7902486.24	5148864.219	9795192.508	9806307.286	8672895.31	5243462.735	11970197.41	9712260.291	11678710.04	9022674.935	11767073.47	9134822.998
B0BN97	Txndc12	Txndc12 protein (Fragment) OS=Rattus norvegicus OX=10116 GN=Txndc12 PE=2 SV=1	31	5	83	5	1	201	22.3	5.86	189.53	5	0	24884743.51	25658626.06	29687223.64	31902522.96	29420310.9	27349433.27	23099424.42	24288560.7	11194411.12	10983729.06	29393711.96	26619467.48
B0BN99	Hmgb3	Hmgb3 protein OS=Rattus norvegicus OX=10116 GN=Hmgb3 PE=1 SV=1	7	1	1	1	1	200	23	8.37	2.17	1	0	365403.2094	254318.0313	322501.997	NA	246643.8873	290045.8761	366442.6088	638615.1961	NA	475890.2216	NA	463551.2779
B0BNA3	Rars2	Arginyl-tRNA synthetase 2, mitochondrial OS=Rattus norvegicus OX=10116 GN=Rars2 PE=2 SV=1	2	1	2	1	1	578	65.3	8.41	4.47	1	0	22788.74909	24884.49414	10478.82399	14620.1126	14509.43333	NA	85726.56141	33610.76268	31928.75274	23051.8562	67855.6501	NA
B0BNA5	Cotl1	Coactosin-like protein OS=Rattus norvegicus OX=10116 GN=Cotl1 PE=1 SV=1	56	7	28	7	1	142	15.9	5.4	47.46	7	0	3002402.956	7187900.5	10297040.07	6107238.115	6671914.908	11373988.96	10778190.15	1998104.886	12675324.99	8224248.295	12032288.62	12210649.66
B0BNA7	Eif3i	Eukaryotic translation initiation factor 3 subunit I OS=Rattus norvegicus OX=10116 GN=Eif3i PE=2 SV=1	50	11	98	11	1	325	36.4	5.64	237.76	11	0	50325367.21	15475516.19	26571031.51	19693801.87	16973705.99	18389403.67	79043701.87	44479665.12	55011500.46	28107192.99	24488140.62	35913053.52
B0BNB0	Golt1b	Golgi transport 1B OS=Rattus norvegicus OX=10116 GN=Golt1b PE=1 SV=1	7	1	11	1	1	138	15.4	10.36	25.46	1	0	31280783.87	35732664	41604456.81	38176860.52	25194722.55	31269162.14	21420708.24	1521402.32	11810940.02	14134935.77	15462851.5	13661586.01
B0BNB1	Commd1	Commd1 protein OS=Rattus norvegicus OX=10116 GN=Commd1 PE=1 SV=1	8	2	5	2	1	188	21	7.55	16.17	2	0	1622469.528	1002505.313	2497253.807	968375.5735	461063.7122	1052542.562	1881687.695	597654.0899	1639322.802	342737.9251	858813.6302	1641053.65
B0BNB5	Nup43	LOC683983 protein OS=Rattus norvegicus OX=10116 GN=Nup43 PE=1 SV=1	2	1	1	1	1	378	41.8	5.47	0	1	0	111268.6052	NA	NA	NA	NA	NA	NA	NA	NA	375812.0223	NA	NA
B0BNB9	Htra2	HtrA serine peptidase 2 OS=Rattus norvegicus OX=10116 GN=Htra2 PE=1 SV=1	13	5	16	5	1	458	49.1	9.5	22.46	5	0	1540596.466	2288815.969	3331156.248	2747389.749	2856605.7	1890890.139	2640497.599	4213161.558	1408381.957	2019069.586	3759312.159	2478677.049
B0BNC0	Ckmt2	Ckmt2 protein OS=Rattus norvegicus OX=10116 GN=Ckmt2 PE=2 SV=1	31	9	57	7	1	419	47.4	8.4	151.67	9	0	44615358.33	6448111.242	15847071.53	19679976.85	3623016.554	4734181.502	1383816.053	520131.8298	12121945.89	971254.7768	3305198.094	4695999.226
B0BND0	Enpp6	Ectonucleotide pyrophosphatase/phosphodiesterase family member 6 OS=Rattus norvegicus OX=10116 GN=Enpp6 PE=1 SV=1	8	3	10	3	1	440	50.7	6.95	25.63	3	0	604337.3694	1027971.156	889144.4919	960867.5769	1508918.407	898764.2899	923727.7201	NA	1073665.633	1264429.158	364331.5518	675666.8951
B0BNE2	Polr2e	DNA-directed RNA polymerases I, II, and III subunit RPABC1 OS=Rattus norvegicus OX=10116 GN=Polr2e PE=2 SV=1	6	1	3	1	1	210	24.6	5.95	4.8	1	0	NA	NA	NA	252194.9768	NA	NA	NA	569119.252	664012.0826	697363.9295	302293.3923	583047.6216
B0BNE3	Trappc5	Trafficking protein particle complex subunit 5 OS=Rattus norvegicus OX=10116 GN=Trappc5 PE=1 SV=1	21	4	29	4	1	188	20.8	9.66	71.37	4	0	12627483.44	6370416	12361220.16	7175464.998	3362298.379	6756414.54	3592727.92	1970468.199	2140557.638	4722214.536	6149743.934	8765909.796
B0BNE5	Esd	S-formylglutathione hydrolase OS=Rattus norvegicus OX=10116 GN=Esd PE=2 SV=1	25	5	44	5	1	282	31.3	6.9	123.7	5	0	6292120.649	6128555.063	4434526.023	5941676.513	7472151.901	5212668.314	6308659.096	25171944.54	8499145.292	1856043.208	4362954.123	3512072.996
B0BNE6	Ndufs8	NADH dehydrogenase (Ubiquinone) Fe-S protein 8 (Predicted), isoform CRA_a OS=Rattus norvegicus OX=10116 GN=Ndufs8 PE=1 SV=1	18	3	53	3	1	212	24	6.21	125.1	3	0	2974823.734	5933147.422	7117225.63	6968901.654	5797086.885	4238733.342	3109825.712	4277734.431	3283329.685	13392612.41	6350863.26	5982944.137
B0BNE7	Tspan7	Tetraspanin OS=Rattus norvegicus OX=10116 GN=Tspan7 PE=2 SV=1	9	3	15	3	1	249	27.5	7.52	36.82	3	0	1506006.109	6918017.125	13231980.07	2037173.32	8598768.085	12994249.27	NA	NA	NA	881270.2347	1505903.036	2403777.867
B0BNF6	5-Mar	Membrane-associated ring finger (C3HC4) 5 OS=Rattus norvegicus OX=10116 GN=March5 PE=1 SV=1	19	4	32	4	1	278	31.2	8.7	77.74	4	0	3042879.66	3910908.906	5542784.316	3886987.712	4904044.233	2862831.141	1863549.231	4555380.359	1853006.995	2548300.797	5743629.951	2965223.063
B0BNF9	Hao1	Hydroxyacid oxidase 1 OS=Rattus norvegicus OX=10116 GN=Hao1 PE=1 SV=1	17	5	6	5	1	370	40.9	7.33	17.29	5	0	1075218.266	884291.2188	896334.2474	349546.4693	1579997.089	1006959.85	1606103.944	9549190.057	140833.8702	315614.6765	1351151.803	1832952.653
B0BNG0	Emc2	ER membrane protein complex subunit 2 OS=Rattus norvegicus OX=10116 GN=Emc2 PE=2 SV=1	23	6	35	6	1	297	34.8	6.81	84.5	6	0	12857847.52	13788574.75	17934783.51	13897785.56	11563522.74	15944447.5	8688602.428	24857546.82	8185916.396	5580750.98	20103760.88	18317454.3
B0BNG1	Prodh2	Proline dehydrogenase OS=Rattus norvegicus OX=10116 GN=Prodh2 PE=2 SV=1	11	4	4	4	1	456	51.1	8.51	11.84	4	0	NA	NA	241229.0112	NA	NA	NA	197408.0089	5061712.114	95013.8339	NA	NA	516490.6634
B0BNG2	Tm6sf2	Transmembrane 6 superfamily member 2 OS=Rattus norvegicus OX=10116 GN=Tm6sf2 PE=2 SV=1	3	1	1	1	1	378	42.5	7.81	2.45	1	0	NA	NA	NA	17202.47499	NA	NA	NA	2222631.62	NA	NA	NA	NA
B0BNG3	Lman2	Lectin, mannose-binding 2 OS=Rattus norvegicus OX=10116 GN=Lman2 PE=1 SV=1	47	15	201	15	1	358	40.4	6.95	486.11	15	0	78598543.39	82241467.95	103947366.7	71855845.53	98282489.07	82765170.14	85542640.31	129534533.5	93679285.96	75711997.54	116754926.6	111423492.5
B0BNH8	LOC685157	LOC685157 protein OS=Rattus norvegicus OX=10116 GN=LOC685157 PE=2 SV=1	5	1	1	1	1	222	25.1	8	1.66	1	0	899044.7581	NA	NA	NA	NA	824401.8442	NA	NA	1525964.409	1772536.487	NA	NA
B0BNI6	Slc25a35	Similar to solute carrier family 25, member 35, isoform CRA_a OS=Rattus norvegicus OX=10116 GN=Slc25a35 PE=1 SV=1	8	2	16	2	1	300	32.5	9.58	33.97	2	0	178850.9346	489317	1144994.405	416944.7879	897831.7866	114054.5789	710374.2518	165087.5564	251492.5446	676505.546	556446.0776	813730.7922
B0BNJ1	Sri	LOC683667 protein OS=Rattus norvegicus OX=10116 GN=Sri PE=1 SV=1	55	10	132	10	1	198	21.6	5.9	277.79	10	0	37098917.24	52707181	35688086.18	50080010.6	52468403.82	48701672.98	48314846.12	4438595.695	105548482	32500144.5	68866808.37	43681980.77
B0BNJ4	Ethe1	ETHE1, persulfide dioxygenase OS=Rattus norvegicus OX=10116 GN=Ethe1 PE=1 SV=1	35	6	67	6	1	254	27.7	7.06	172.38	6	0	8081906.067	12540938.66	17013694.49	17954512.84	14055295.55	10563996.12	11421189.56	5352804.501	3984435.463	12741901	8659354.629	7443085.984
B0BNJ8	#N/A	H2-T24 protein OS=Rattus norvegicus OX=10116 GN=H2-T24 PE=2 SV=1	5	2	8	1	1	349	40	5.91	17.49	2	0	425745.822	479945.5938	253326.6456	256521.9544	441286.2813	404928.2524	81537.09488	NA	188115.2604	179938.4792	120978.1602	246786.9077
B0BNJ9	Tmem14c	RCG44002, isoform CRA_a OS=Rattus norvegicus OX=10116 GN=Tmem14c PE=1 SV=1	10	1	14	1	1	114	11.7	9.64	31.04	1	0	1869830.827	1816245.813	3761040.88	2260208.962	1804901.317	2609981.075	932271.6465	1026517.623	2781965.057	3640017.194	3043676.491	2384589.37
B0BNK1	Rab5c	RAB5C, member RAS oncogene family OS=Rattus norvegicus OX=10116 GN=Rab5c PE=1 SV=1	48	8	229	5	1	216	23.4	8.41	587.73	8	3	101832987.7	108666426.7	98083762.67	93233510.56	124963581.6	93904063.76	63651102.87	29978730.18	75736982.08	53173384.27	86382870.52	93357945.19
B0BNK4	Pstpip1	Proline-serine-threonine phosphatase-interacting protein 1 OS=Rattus norvegicus OX=10116 GN=Pstpip1 PE=1 SV=1	13	3	8	3	1	416	47.5	5.53	18.9	3	0	NA	NA	NA	NA	204109.5977	NA	692580.4169	NA	739730.5559	592368.5562	880519.9876	698164.5578
B0BNL2	Pin1	Peptidyl-prolyl cis-trans isomerase OS=Rattus norvegicus OX=10116 GN=Pin1 PE=1 SV=1	12	1	12	1	1	165	18.3	8.82	21.54	1	0	137321.8314	189249.9531	NA	NA	187003.1162	63756.21622	315124.1744	300819.6627	665417.8212	263210.7445	218889.3908	521303.3568
B0BNL5	Reep3	Receptor expression-enhancing protein OS=Rattus norvegicus OX=10116 GN=Reep3 PE=2 SV=1	9	2	3	2	1	254	29.2	9.58	6.44	2	0	1259243.732	807747.125	761511.3058	683558.3762	789946.3086	569384.5397	815044.4967	1188052.211	686890.7463	328908.5592	NA	1968716.775
B0BNL6	Arrdc1	Arrestin domain-containing protein 1 OS=Rattus norvegicus OX=10116 GN=Arrdc1 PE=1 SV=1	12	5	13	5	1	434	46.1	7.02	26.24	5	0	3966411.819	5447054.063	5216980.15	5715292.281	4524209.868	5645277.884	446127.0208	874313.387	4845997.601	2049619.258	2878831.102	3410228.25
B0BNL7	Rell1	RELT-like 1 OS=Rattus norvegicus OX=10116 GN=Rell1 PE=1 SV=1	6	1	14	1	1	272	29.5	8.1	42.9	1	0	1943381.64	2114857.813	1956643.37	1476300.487	1694316.406	1603252.91	1515597.414	819413.623	1937974.097	523210.4738	NA	81653.34528
B0BNM1	Naxe	NAD(P)H-hydrate epimerase OS=Rattus norvegicus OX=10116 GN=Naxe PE=2 SV=1	24	4	19	4	1	282	30.9	6.89	43.44	4	0	2294589.524	3334391.938	1629728.332	4143374.056	2835672.76	1756143.808	4373435.521	1574548.185	1163007.972	1494316.073	1529575.445	3901704.712
B0BNM3	Snx9	Sorting nexin OS=Rattus norvegicus OX=10116 GN=Snx9 PE=2 SV=1	15	7	40	7	1	595	66.4	5.58	88.87	7	0	8651323.006	7173245.031	3638759.638	5459739.426	5614656.619	6777549.429	8595229.761	3936186.848	11203356.84	4825201.343	9868833.188	12092150.05
B0BNM6	Ap3s2	LOC683402 protein OS=Rattus norvegicus OX=10116 GN=Ap3s2 PE=2 SV=1	11	2	8	2	1	193	22	5.22	16.95	2	0	4432625.495	1962165.406	2780159.444	1674235.483	3757283.657	239175.015	535863.0661	389482.898	413572.7942	269769.0948	3103833.531	4453202.672
B0BNM9	Gltp	Glycolipid transfer protein OS=Rattus norvegicus OX=10116 GN=GLTP PE=2 SV=1	5	1	3	1	1	209	23.7	7.39	3.59	1	0	552450.3119	502943.9375	631741.0509	649543.7616	750252.6913	541009.6581	416933.4107	NA	809108.3645	898800.3483	498001.0441	331311.8189
B0BNN3	Car1	Carbonic anhydrase 1 OS=Rattus norvegicus OX=10116 GN=Ca1 PE=1 SV=1	70	12	227	12	1	261	28.3	7.42	619.21	12	0	58759548.02	97393689.44	74347411.3	64724697.39	130617032	94829085.4	84339465.66	27380878.3	176561101.5	53474181.31	103398196.8	154981342.4
B0BNN4	Cfp	Complement factor properdin OS=Rattus norvegicus OX=10116 GN=Cfp PE=1 SV=1	17	5	52	5	1	465	50.5	7.9	166	5	0	15296207.07	7178232.813	5513487.38	7685988.259	10414716.25	6277320.709	12393611.66	3312284.292	12721063.14	13720357.9	20550594.07	22281457.74
B0K008	Eif1	Eukaryotic translation initiation factor 1 OS=Rattus norvegicus OX=10116 GN=Eif1 PE=1 SV=1	27	2	7	2	1	113	12.7	7.44	17.51	2	0	681088.8744	682479.8125	896069.328	898224.5588	725885.7562	535500.0448	327612.2862	666690.5394	618961.3537	180190.1674	559957.9058	1061367.476
B0K010	Txndc17	Thioredoxin domain-containing 17 OS=Rattus norvegicus OX=10116 GN=Txndc17 PE=1 SV=1	19	2	14	2	1	123	14.1	4.93	30.26	2	0	2750563.343	3268193.25	2342771.757	3014803.084	3431773.357	2288730.08	2613212.132	1546984.755	914639.1129	762821.4478	1281188.276	1059808.632
B0K014	Dtd1	D-aminoacyl-tRNA deacylase OS=Rattus norvegicus OX=10116 GN=Dtd1 PE=1 SV=1	15	2	17	2	1	209	23.4	7.87	37.98	2	0	1560684.711	2361969.344	3363344.72	2150376.226	1226373.152	1938734.991	2307807.807	528458.8107	1302462.652	1570707.014	2352973.465	1613560.626
B0K015	Commd8	COMM domain containing 8 (Predicted), isoform CRA_a OS=Rattus norvegicus OX=10116 GN=Commd8 PE=1 SV=1	13	2	4	2	1	183	20.8	5.4	9.97	2	0	648204.814	146993.2344	533573.683	489453.1173	2316871.415	249118.1087	2984222.611	800295.9257	1803098.275	251941.3933	1925182.527	1563791.953
B0K020	Cisd1	CDGSH iron-sulfur domain-containing protein 1 OS=Rattus norvegicus OX=10116 GN=Cisd1 PE=3 SV=1	36	4	37	4	1	108	12.1	8.84	99.92	4	0	16201290.27	14433832.25	28127987.19	12116160.36	8307035.807	6784850.55	9221035.711	36063050.3	3942488.917	6920061.981	3232049.111	7346996.18
B0K025	Ostc	Oligosaccharyltransferase complex subunit OSTC OS=Rattus norvegicus OX=10116 GN=Ostc PE=2 SV=1	8	1	17	1	1	149	16.8	9.13	44.06	1	0	8970982.9	8025693.5	3454375.203	2321359.202	8310936.113	4106715.853	8022954.501	62835548.86	15256367.39	15433270.25	24076967.03	19414767.22
B0K026	Letmd1	LETM1 domain-containing 1 OS=Rattus norvegicus OX=10116 GN=Letmd1 PE=1 SV=1	6	2	11	2	1	371	43.1	10.67	30.74	2	0	1899229.545	2144655.5	4356149.301	2844011.243	2039946.682	2100103.491	601474.6137	2261394.07	1098474.333	1401713.395	2415294.581	858116.259
B0K030	Dnajb1	DnaJ (Hsp40) homolog, subfamily B, member 1 (Predicted), isoform CRA_b OS=Rattus norvegicus OX=10116 GN=Dnajb1 PE=1 SV=1	14	4	32	3	1	340	38.1	8.63	79.75	4	0	1493153.857	1478783.219	1559646.462	1191328.547	1623028.657	1634261.172	1244703.356	3113855.701	1618675.241	1190262.294	1702918.89	1452820.522
B0K031	Rpl7	60S ribosomal protein L7 OS=Rattus norvegicus OX=10116 GN=Rpl7 PE=1 SV=1	35	14	230	14	1	260	30.3	10.87	574.79	14	0	217293838.2	105391057.9	116370993.6	100080798.8	121955627.1	111068601.3	237991369.2	442976566.2	213341054.8	32753271.38	183250336.9	289771481.3
B0K032	Ptp4a3	Protein tyrosine phosphatase 4a3 (Predicted), isoform CRA_a OS=Rattus norvegicus OX=10116 GN=Ptp4a3 PE=2 SV=1	6	1	3	1	1	173	19.6	9.32	5.76	1	0	58986.21006	90780.73438	27811.47785	32451.39623	82342.65791	38313.16001	NA	NA	61285.76155	NA	46731.55385	100405.2364
B0LPN4	Ryr2	Ryanodine receptor 2 OS=Rattus norvegicus OX=10116 GN=Ryr2 PE=1 SV=2	0	1	1	1	1	4953	562.6	6.1	2.85	1	0	358170.75	NA	NA	NA	NA	NA	NA	NA	NA	NA	NA	NA
B0LT89	Stk24	Serine/threonine-protein kinase 24 OS=Rattus norvegicus OX=10116 GN=Stk24 PE=2 SV=1	37	16	92	7	1	431	48	5.43	190.34	16	8	47968385.08	53405589.72	34058139.37	40669729.14	50250973.94	43549634.72	22417397.34	3100751.351	19821189.16	14438696.54	19765080.95	25948885.37
B1H223	Dscr3	Down syndrome critical region gene 3 OS=Rattus norvegicus OX=10116 GN=Vps26c PE=2 SV=1	40	8	74	8	1	297	32.9	7.68	161.28	8	0	14870079.37	13524510.91	14201493.46	15330034.53	15193640.95	12181036.17	13902004.22	7941967.276	12546948.22	10600467.32	8373340.006	10866329.81
B1H230	Map2k3	Map2k3 protein OS=Rattus norvegicus OX=10116 GN=Map2k3 PE=1 SV=1	3	1	1	1	1	347	39.3	7.43	2.49	1	0	NA	NA	1711984.461	NA	1148721.843	NA	1275790.877	1212070.405	4940789.108	1764996.594	1256128.693	1380922.559
B1H232	Islr	Immunoglobulin superfamily-containing leucine-rich repeat OS=Rattus norvegicus OX=10116 GN=Islr PE=1 SV=1	4	1	3	1	1	428	45.7	5.68	5.35	1	0	NA	76088.36719	NA	11898.26649	89638.38131	NA	151916.2796	NA	43115.4447	87894.58372	112905.7163	146298.6249
B1H234	Flrt3	Leucine-rich repeat transmembrane protein FLRT3 OS=Rattus norvegicus OX=10116 GN=Flrt3 PE=1 SV=1	6	3	7	3	1	649	72.9	8.06	14.14	3	0	883937.7616	865806.8125	781010.1151	704604.9473	611040.2621	582624.7842	1232701.404	NA	701710.1545	138173.3162	753759.923	808457.8681
B1H241	Ric8a	Resistance to inhibitors of cholinesterase 8 homolog A (C. elegans) OS=Rattus norvegicus OX=10116 GN=Ric8a PE=1 SV=1	1	1	4	1	1	530	59.8	5.68	1.7	1	0	158118.7451	171875.875	159827.7415	100344.756	114675.5608	160193.4124	294613.1973	367361.954	198283.0086	115495.71	222128.561	198579.6129
B1H248	Vps36	Vacuolar protein-sorting-associated protein 36 OS=Rattus norvegicus OX=10116 GN=Vps36 PE=1 SV=1	3	1	1	1	1	386	43.7	7.46	2.09	1	0	825972.0943	739499.9375	NA	761212.9765	744734.334	285227.2649	1350661.233	987427.2803	1232148.114	1089845.758	1008543.274	792798.8528
B1H250	Glyatl1	Glycine-N-acyltransferase-like 1 OS=Rattus norvegicus OX=10116 GN=Glyatl1 PE=1 SV=1	28	6	9	6	1	296	34	8.02	24.67	6	0	105743.6578	510572.3008	534429.2828	NA	NA	NA	NA	17222134.58	NA	478143.5611	209436.1238	76935.82799
B1H251	Fcer1g	Fcer1g protein OS=Rattus norvegicus OX=10116 GN=Fcer1g PE=2 SV=1	33	4	45	4	1	86	9.8	6	115.75	4	0	19837898.32	17788963.88	20628907.62	12871557.88	18039908.12	20798491.14	27552309.71	6679511.655	34167874.27	16164735.77	38681791.23	30079936.22
B1H253	Proz	Proz protein (Fragment) OS=Rattus norvegicus OX=10116 GN=Proz PE=2 SV=1	10	3	5	3	1	410	45.8	5.54	10.51	3	0	20410.36586	124040.0078	NA	NA	NA	366332.4213	390824.0872	965496.3993	NA	873752.2707	1265707.197	1569088.945
B1H257	Borcs5	BLOC-1-related complex subunit 5 OS=Rattus norvegicus OX=10116 GN=Borcs5 PE=1 SV=1	13	2	11	2	1	195	22.2	6.55	23.79	2	0	2975924.394	2738833.5	4869832.14	1188984.779	2845270.594	3430217.109	2786509.655	2010455.617	1038728.21	939109.6093	1516112.28	1707594.959
B1H261	Tysnd1	Trypsin domain containing 1 (Predicted), isoform CRA_a OS=Rattus norvegicus OX=10116 GN=Tysnd1 PE=1 SV=1	5	2	2	2	1	567	58.9	6.95	3.93	2	0	430998.4803	NA	771805.5127	650806.0278	NA	427223.2358	NA	2586016.118	NA	NA	NA	NA
B1H262	Ppp1r9b	Protein phosphatase 1, regulatory subunit 9B OS=Rattus norvegicus OX=10116 GN=Ppp1r9b PE=2 SV=1	6	4	17	4	1	817	89.6	4.92	26.36	4	0	157100.1009	352172.0781	191978.8097	1074669.089	1071591.59	1098594.675	648917.1195	NA	106003.6116	203185.9455	1148460.113	777510.8966
B1H264	Tbc1d17	TBC1 domain family, member 17 OS=Rattus norvegicus OX=10116 GN=Tbc1d17 PE=1 SV=1	1	1	2	1	1	646	72.8	5.22	4.18	1	0	255516.9638	NA	318866.8088	380235.8335	316521.2054	223503.0823	385162.8485	NA	551753.6509	696313.6687	556878.9908	464150.1137
B1H266	Trappc9	Nibp protein (Fragment) OS=Rattus norvegicus OX=10116 GN=Nibp PE=2 SV=1	12	5	24	3	1	569	62.8	5.19	62.02	5	0	1751457.628	742181.3125	1456265.974	967532.2417	2066304.454	1333858.682	1770064.603	487869.7735	1239836.73	433721.9663	1607988.864	909326.0811
B1H267	Snx5	Sorting nexin-5 OS=Rattus norvegicus OX=10116 GN=Snx5 PE=1 SV=1	40	14	127	13	1	404	46.8	6.62	254.85	14	0	44032452.21	26799586.65	27196331.24	38759342.8	32818984.3	25903147.13	58899824.86	33394576.63	76214695.73	21127468.33	29755632.56	53468631.06
B1H270	Suclg2	Succinate--CoA ligase [GDP-forming] subunit beta, mitochondrial OS=Rattus norvegicus OX=10116 GN=Suclg2 PE=2 SV=1	42	15	146	15	1	434	47	7.72	342.49	15	0	43156223.57	71121544.11	86024791.05	89327895.75	73250184.96	67592287.56	30269531.61	68310815.11	26422955.74	76703874.11	48494629.37	32616120.2
B1H282	Colgalt1	Collagen beta(1-O)galactosyltransferase 1 OS=Rattus norvegicus OX=10116 GN=Colgalt1 PE=1 SV=1	22	12	110	12	1	617	71.1	7.12	230.63	12	0	19718362.58	18311371.02	24939051.87	23709640.33	24139503.38	23486419.69	19880850.56	20638119.37	10707029.59	14711542.9	29647598.54	28617740.32
B1H2A6	Fxr2	FMR1 autosomal homolog 2 OS=Rattus norvegicus OX=10116 GN=Fxr2 PE=1 SV=1	11	6	27	3	1	675	74.3	6.1	61.24	6	0	4100533.51	88574.17188	2361171.258	1003420.881	1705454.947	595261.0701	2394188.843	NA	623063.0043	NA	3113699.804	5484788.152
B1PLB1	Cd34	CD34 antigen (Predicted) OS=Rattus norvegicus OX=10116 GN=Cd34 PE=1 SV=1	22	7	108	7	1	386	41.2	5.49	258.02	7	0	80652956.78	93925396.5	72215918.04	67929869.11	98225698.3	86654278.43	46673613.35	367906.3969	56325825.77	32759191.49	47467510.68	70323621.76
B1WBM0	Cd9	Tetraspanin OS=Rattus norvegicus OX=10116 GN=Cd9 PE=2 SV=1	27	6	184	6	1	226	25.2	7.27	475.22	6	0	651365686.8	552634538	407779474.1	337728732.3	527781500.5	566615256.5	263822342.6	5025782.665	236466617.4	236207779	199242439.3	224330284.1
B1WBP4	Nadsyn1	Glutamine-dependent NAD(+) synthetase OS=Rattus norvegicus OX=10116 GN=Nadsyn1 PE=1 SV=1	2	1	1	1	1	725	81.5	6.49	1.82	1	0	NA	NA	NA	NA	NA	NA	NA	NA	NA	NA	NA	NA
B1WBQ5	Stk3	Serine/threonine kinase 3 (STE20 homolog, yeast) OS=Rattus norvegicus OX=10116 GN=Stk3 PE=1 SV=1	18	7	26	1	1	491	56.1	5.15	55.23	7	0	79189.25998	55559.24219	NA	53367.25269	103943.1146	NA	394696.9551	NA	285746.9278	NA	NA	76195.10299
B1WBS4	Vps26b	Similar to Vacuolar protein sorting 26 homolog (VPS26 protein homolog), isoform CRA_a OS=Rattus norvegicus OX=10116 GN=Vps26b PE=1 SV=1	32	9	110	9	1	336	39.1	7.37	278.35	9	0	55558931.04	37123274.63	42303548.49	37030813.71	54833180.99	33772677.51	23108622.32	7882651.641	22125229.83	19877514.96	12212238.23	33288027.75
B1WBU9	Pygm	Alpha-1,4 glucan phosphorylase OS=Rattus norvegicus OX=10116 GN=Pygm PE=2 SV=1	23	15	127	8	1	842	97.3	7.11	253.02	15	0	2195441.719	2534907.117	3618859.902	2504486.376	5344268.454	1900358.533	2696501.197	219146.2206	4751402.97	1284143.474	2531622.906	4336788.977
B1WBV1	Aida	Axin interactor, dorsalization-associated OS=Rattus norvegicus OX=10116 GN=Aida PE=1 SV=1	6	1	9	1	1	305	34.8	6.74	26.2	1	0	NA	278540.1875	NA	NA	NA	NA	NA	209460.0739	NA	172651.1829	192185.7884	412127.5887
B1WBV4	Plekhf2	Pleckstrin homology and FYVE domain-containing 2 OS=Rattus norvegicus OX=10116 GN=Plekhf2 PE=1 SV=1	21	3	11	3	1	249	27.7	8.21	27.73	3	0	983486.4468	555280.375	292734.2156	492819.2008	862871.7206	393277.1139	1004588.322	179570.7847	1283538.834	440606.5718	993266.1118	971005.1717
B1WBW4	Armc10	Armadillo repeat-containing protein 10 OS=Rattus norvegicus OX=10116 GN=Armc10 PE=1 SV=1	38	8	70	8	1	306	33.4	7.97	172.3	8	0	9916800.486	10799441.62	18154165.65	13040086.4	11510758.66	9866556.812	4936995.55	4715764.531	3792819.255	8178844.897	11253646.14	6559601.394
B1WBW9	Abhd10	Abhd10 protein OS=Rattus norvegicus OX=10116 GN=Abhd10 PE=2 SV=1	7	1	2	1	1	297	33.1	8.9	5.77	1	0	NA	NA	NA	NA	NA	NA	NA	NA	NA	NA	NA	NA
B1WBX5	Slc43a1	Solute carrier family 43, member 1 OS=Rattus norvegicus OX=10116 GN=Slc43a1 PE=2 SV=1	13	5	25	5	1	606	67.1	8.46	48.46	5	0	10344750.14	8564288.813	5400627.985	4191740.872	17505336.26	14536398.64	3446443.436	4429227.07	4271885.391	2756562.111	1576291.815	2744692.06
B1WBY1	Cul1	Cul1 protein OS=Rattus norvegicus OX=10116 GN=Cul1 PE=1 SV=1	9	6	12	6	1	776	89.6	8	30.95	6	0	1668263.813	62068.61328	1269775.913	1326606.906	2479070.155	1660915.076	2980605.444	2921419.853	5395621.967	994365.4088	2342890.507	4284011.279
B1WBY3	Alg12	Mannosyltransferase OS=Rattus norvegicus OX=10116 GN=Alg12 PE=1 SV=1	2	1	1	1	1	488	54.7	9.39	1.86	1	0	336322.0797	475915.5938	427246.5729	501429.6115	450807.3285	406419.3099	180892.5441	798547.9658	382516.5509	187006.2118	273082.4497	232145.0384
B1WBY5	Dnajc11	DnaJ (Hsp40) homolog, subfamily C, member 11 OS=Rattus norvegicus OX=10116 GN=Dnajc11 PE=1 SV=1	19	9	31	9	1	559	63.2	8.32	64.17	9	0	8177173.222	9064109.641	11132801.08	9772538.277	7544459.444	7980328.706	5779778.097	5810270.536	5480504.454	4756073.289	7736841.22	5280450.218
B1WBY7	Erlin1	ER lipid raft-associated 1 OS=Rattus norvegicus OX=10116 GN=Erlin1 PE=1 SV=1	23	7	51	5	1	348	39.2	7.01	123.36	7	0	6959023.223	5808781.418	3624930.542	4578859.65	7566862.476	4133889.035	2178501.155	15237651.87	1267421.342	2293606.309	4190065.179	3874047.896
B1WC02	Ctps1	CTP synthase OS=Rattus norvegicus OX=10116 GN=Ctps1 PE=1 SV=1	16	8	40	7	1	591	66.6	6.58	86.04	8	1	4599068.994	4503191.969	1696927.351	2985030.443	6851232.742	1592539.416	8034170.002	741954.6632	11982180.84	5230983.121	13096405.98	11199021.25
B1WC06	Mon1a	MON1 homolog A, secretory-trafficking-associated OS=Rattus norvegicus OX=10116 GN=Mon1a PE=1 SV=1	4	2	4	2	1	555	62.1	6.14	10.1	2	0	324226.9816	818085.4063	429211.4218	467032.08	329975.8681	1238078.106	NA	472663.002	675626.1512	NA	688767.0302	737015.4894
B1WC12	Mfsd5	Major facilitator superfamily domain-containing 5 OS=Rattus norvegicus OX=10116 GN=Mfsd5 PE=2 SV=1	3	1	10	1	1	450	49.7	7.96	23.9	1	0	171077.2656	280292.3438	195234.8937	NA	378183.0066	NA	NA	278699.9921	340928.9176	466506.9432	1101037.37	NA
B1WC21	Fbln1	Fibulin-1 OS=Rattus norvegicus OX=10116 GN=Fbln1 PE=1 SV=1	7	5	15	1	1	685	75.3	5.24	32.01	5	0	343016.7795	292407.8906	430745.2827	241026.7785	NA	359648.5955	NA	311650.5031	215181.9388	1367595.776	529795.7953	222186.4599
B1WC24	Ctdsp1	CTD small phosphatase 1 OS=Rattus norvegicus OX=10116 GN=Ctdsp1 PE=1 SV=1	4	1	12	1	1	261	29.3	6.13	33.42	1	0	2316892.847	3286808.5	6020393.736	2577369.002	8588572.12	3814841.937	2673589.97	2929513.198	5440486.79	2119333.199	2212666.082	3828887.556
B1WC26	Nans	N-acetylneuraminate synthase OS=Rattus norvegicus OX=10116 GN=Nans PE=1 SV=1	23	6	55	6	1	359	40	6.84	140.91	6	0	4851942.098	6549030.25	3768194.916	3727464.9	5490884.167	5635401.044	4349599.782	25615810.35	12088455.68	4883066.226	7149029.704	7423164.705
B1WC32	Uba2	RCG53609 OS=Rattus norvegicus OX=10116 GN=Uba2 PE=2 SV=1	2	1	2	1	1	639	70.7	5.25	5.62	1	0	NA	NA	166080.3333	280255.3179	590955.2623	NA	1398828.718	1668186.979	1390956.749	915209.9465	819784.5944	592497.0789
B1WC33	Cdc42ep4	CDC42 effector protein (Rho GTPase binding) 4 (Predicted), isoform CRA_a OS=Rattus norvegicus OX=10116 GN=Cdc42ep4 PE=1 SV=1	18	4	21	4	1	350	37.9	5.62	48.53	4	0	1818272.841	1780644.766	2006917.553	1839313.293	2003578.85	1647460.655	1851601.525	127207.3753	476782.8004	344862.6445	550173.5201	946916.963
B1WC34	Prkcsh	Protein kinase C substrate 80K-H OS=Rattus norvegicus OX=10116 GN=Prkcsh PE=1 SV=1	38	15	248	15	1	525	59.2	4.48	616.95	15	0	171948960.6	168336806.1	203806880.8	166411443.5	184031665.9	203320015.4	186279291.5	216058411.1	102446530.1	139427005.5	183999309.6	168144173.1
B1WC42	Trip6	LOC686323 protein OS=Rattus norvegicus OX=10116 GN=Trip6 PE=2 SV=1	8	3	17	3	1	480	50.9	7.42	38.21	3	0	1423388.448	1116436.641	1643050.276	1128143.053	1080560.983	1666884.839	2355684.846	275929.2941	2726680.681	4822041.01	2296364.956	2840608.069
B1WC43	Tmem41a	LOC681708 protein OS=Rattus norvegicus OX=10116 GN=Tmem41a PE=2 SV=1	5	1	5	1	1	264	29.2	8.97	11.62	1	0	NA	NA	NA	NA	NA	NA	NA	NA	NA	NA	NA	NA
B1WC44	Nmd3	60S ribosomal export protein NMD3 OS=Rattus norvegicus OX=10116 GN=Nmd3 PE=2 SV=1	2	1	2	1	1	503	57.7	7.25	4.42	1	0	8008431.644	5543765.5	6498278.71	6734997.932	5535701.985	7389407.234	8079299.289	10149819.22	6561203.99	18224645.33	10861267.98	8961202.792
B1WC49	Api5	Api5 protein OS=Rattus norvegicus OX=10116 GN=Api5 PE=1 SV=1	8	3	6	3	1	504	56.8	5.92	15.22	3	0	759430.9365	NA	NA	946456.7556	116175.4665	178925.538	585078.8271	1493905.455	483558.2554	774950.7222	325869.7035	NA
B1WC61	Acad9	Acad9 protein OS=Rattus norvegicus OX=10116 GN=Acad9 PE=1 SV=1	32	17	114	17	1	625	68.8	7.69	298.19	17	0	18478442.78	33942703.13	52027524.38	41168166.49	52543893.97	27919683.42	19413372.1	23402850.93	7567753.668	29219762.83	22214728.14	12363407.77
B1WC67	Slc25a24	RCG29001 OS=Rattus norvegicus OX=10116 GN=Slc25a24 PE=1 SV=1	35	14	138	14	1	475	52.9	8.05	300.18	14	0	62917418.63	93487446.59	130742212.8	135916231.8	113225839.9	93943122.07	39932312.42	8701733.876	27693002.37	68061577.35	98877998.28	72275502.06
B1WC71	Aspscr1	Aspscr1 protein OS=Rattus norvegicus OX=10116 GN=Aspscr1 PE=2 SV=1	4	1	6	1	1	467	51.1	7.78	16.87	1	0	NA	NA	NA	NA	NA	NA	NA	NA	NA	NA	NA	NA
B1WC73	Arl6	ADP-ribosylation factor-like 6 (Predicted), isoform CRA_a OS=Rattus norvegicus OX=10116 GN=Arl6 PE=1 SV=1	29	5	13	5	1	186	21	8.25	31.75	5	0	4356158.875	6408779.094	1285558.566	4073074.94	5629537.693	1040344.602	3443195.979	6673915.571	5477859.688	663316.1552	416041.5488	4425836.316
B1WC77	Kdelr3	ER lumen protein-retaining receptor OS=Rattus norvegicus OX=10116 GN=Kdelr3 PE=2 SV=1	5	1	3	1	1	214	25.1	9.06	5.86	1	0	496026.9214	618051	978909.357	534736.3032	1248431.359	714972.3287	158150.0481	NA	NA	NA	659742.5036	640635.5989
B1WC80	RGD1563692	Uncharacterized protein RGD1563692_predicted OS=Rattus norvegicus OX=10116 GN=Mab21l4 PE=2 SV=1	4	2	5	2	1	452	50.4	6.52	11.59	2	0	64681.26146	200508.5938	35411.95949	65088.15529	163304.2278	181710.1385	952717.7434	NA	908701.8452	1183874.92	1351558.097	554147.3429
B1WC84	Cnpy4	Canopy 4 homolog (Zebrafish) OS=Rattus norvegicus OX=10116 GN=Cnpy4 PE=1 SV=1	21	4	22	4	1	247	28.4	4.86	58.89	4	0	4454414.086	8443529.344	7777482.522	6323700.583	6595284.595	2891229.997	4146377.691	1443804.812	NA	3139077.122	3797330.092	6234310.46
B1WC85	Wdr92	RCG23253, isoform CRA_a OS=Rattus norvegicus OX=10116 GN=Wdr92 PE=1 SV=1	7	2	7	2	1	357	39.9	7.91	14.6	2	0	463822.8793	549858.8281	1116107.077	814227.3655	302121.5914	845174.2851	1305259.108	427358.3442	1271595.227	116405.1119	214948.6443	1345892.49
B1WCA2	Ttc25	Tetratricopeptide repeat domain 25 OS=Rattus norvegicus OX=10116 GN=Ttc25 PE=2 SV=1	4	2	3	2	1	645	74	5.48	7.66	2	0	NA	84856.17969	NA	200746.3506	NA	NA	84688.32841	NA	52368.33046	71946.70923	NA	450431.1194
B2B9A9	Efnb2	Ephrin B2 OS=Rattus norvegicus OX=10116 GN=Efnb2 PE=2 SV=1	9	2	9	2	1	336	37.3	8.88	22.91	2	0	505454.2286	444733.0625	338531.0916	513002.0134	1765508.044	420734.2074	220128.3205	NA	44551.7688	450433.6742	174159.0777	110571.1947
B2GUU4	Lonp2	Lon protease homolog 2, peroxisomal OS=Rattus norvegicus OX=10116 GN=Lonp2 PE=2 SV=1	6	4	19	4	1	852	94.3	7.23	34.21	4	0	1615384.053	1355262.813	1859840.449	1539050.889	1835191.458	1140894.418	1273605.336	6071379.205	721213.5336	1267255.518	2475950.182	1045705.855
B2GUV5	Atp6v1g1	V-type proton ATPase subunit G OS=Rattus norvegicus OX=10116 GN=Atp6v1g1 PE=1 SV=1	19	2	29	2	1	118	13.7	7.28	124.45	2	0	5592754.606	4347524.75	5627399.177	6642440.813	7677182.143	7207806.559	8498942.238	3851713.347	5329648.517	12711085.97	4693938.783	6683696.785
B2GUV7	Eif5b	Eukaryotic translation initiation factor 5B OS=Rattus norvegicus OX=10116 GN=Eif5b PE=1 SV=1	10	7	48	7	1	1216	137.6	5.57	129.16	7	0	2844627.043	1515002.984	1576558.166	1753944.599	3459999.427	1278810.237	8512209.322	6412799.181	10981103.62	6232097.496	9200855.431	13167829.19
B2GUV9	Exoc3l4	Exocyst complex component 3-like 4 OS=Rattus norvegicus OX=10116 GN=Exoc3l4 PE=1 SV=1	6	3	4	3	1	721	81	6.42	9.97	3	0	123997.3193	218908.75	217436.7564	682498.7986	818675.6875	1094215.074	334173.2642	NA	NA	NA	5993071.832	8812106.052
B2GUW4	Exd2	Exdl2 protein OS=Rattus norvegicus OX=10116 GN=Exd2 PE=2 SV=1	2	1	1	1	1	648	74	7.9	2.02	1	0	157397.9081	383153.3438	132707.7397	221379.3699	441011.1953	140104.1893	NA	82916.24652	179149.4184	187037.2363	356029.1617	305716.4226
B2GUX5	Nt5c3a	5'-nucleotidase OS=Rattus norvegicus OX=10116 GN=Nt5c3a PE=1 SV=1	4	1	2	1	1	297	33.8	5.47	5.21	1	0	NA	NA	NA	NA	NA	NA	NA	NA	NA	NA	NA	NA
B2GUX7	Creg1	Cellular repressor of E1A-stimulated genes (Predicted), isoform CRA_b OS=Rattus norvegicus OX=10116 GN=Creg1 PE=1 SV=1	14	2	3	2	1	220	24.4	6.42	8.31	2	0	16888.93742	196761.9141	NA	NA	66167.73635	NA	74013.96658	5736284.957	NA	51011.37551	329636.8363	358909.8483
B2GUY0	Man1b1	Endoplasmic reticulum mannosyl-oligosaccharide 1,2-alpha-mannosidase OS=Rattus norvegicus OX=10116 GN=Man1b1 PE=2 SV=2	2	1	3	1	1	657	74.8	8.22	4.5	1	0	243589.3261	493161.75	644816.7544	600460.1392	531468.2168	556115.2102	471794.8215	471195.3442	NA	2017845.504	1116782.807	591390.8114
B2GUY2	Tfr2	Transferrin receptor protein 2 OS=Rattus norvegicus OX=10116 GN=Tfr2 PE=2 SV=1	11	7	9	7	1	798	88.3	6.11	21.32	7	0	669036.6365	2045759.391	3739412.164	4109179.162	1255701.344	3399597.945	NA	8969631.658	497551.2029	401004.8348	2513076.16	1535086.613
B2GUY4	Dmtn	Dematin actin-binding protein OS=Rattus norvegicus OX=10116 GN=Dmtn PE=1 SV=1	7	2	7	2	1	354	39.5	7.02	15.6	2	0	1933717.605	2027338.813	1988478.421	2079529.875	1993245.141	6611673.262	689044.1939	4091578.929	180302.3609	182664.4849	301470.6218	363365.2088
B2GUY8	Slc25a17	Slc25a17 protein OS=Rattus norvegicus OX=10116 GN=Slc25a17 PE=1 SV=1	12	4	18	4	1	307	34.3	10.11	23.08	4	0	3262061.497	4054974.234	5276193.23	3933455.1	5116841.073	3578728.868	251996.7396	1341123.145	883361.4855	1016715.677	1687418.853	1561355.051
B2GUZ3	Mthfd1l	Methylenetetrahydrofolate dehydrogenase (NADP+-dependent) 1-like OS=Rattus norvegicus OX=10116 GN=Mthfd1l PE=1 SV=1	14	12	46	12	1	977	105.8	7.5	98.59	12	0	6365251.372	10540076.81	22053510.15	17941461.77	11271450.71	11676909.18	15646829.48	3005018.992	16441757.08	18361539.77	7449713.604	9645829.194
B2GUZ4	Pex26	Peroxisomal biogenesis factor 26 OS=Rattus norvegicus OX=10116 GN=Pex26 PE=1 SV=1	6	1	1	1	1	301	33.1	6.73	3.21	1	0	NA	NA	NA	NA	NA	NA	NA	NA	NA	NA	NA	NA
B2GUZ5	Capza1	F-actin-capping protein subunit alpha-1 OS=Rattus norvegicus OX=10116 GN=Capza1 PE=1 SV=1	52	9	194	7	1	286	32.9	5.69	533.38	9	0	10785663.63	15098502.64	12669140.77	13643217.26	15081103.44	8473105.92	21859967.61	3354527.183	18785131.68	27593201.2	21442498.68	22212137.14
B2GUZ8	Slc35e3	Slc35e3 protein OS=Rattus norvegicus OX=10116 GN=Slc35e3 PE=2 SV=1	2	1	2	1	1	313	34.8	9.16	1.87	1	0	NA	597324.5	799233.472	NA	398449.2136	508392.1205	76113.79229	89957.67968	373279.7461	317950.1255	NA	619465.9357
B2GUZ9	Fam49b	Fam49b protein OS=Rattus norvegicus OX=10116 GN=Fam49b PE=1 SV=1	27	7	41	6	1	324	36.8	6.06	89.52	7	1	2221052.981	3527932.859	2160088.386	1877275.429	4582913.114	2779737.945	3219321.483	666520.7468	5802160.831	7264263.332	13116743.89	12660266.55
B2GV01	Mta2	Metastasis-associated 1 family, member 2 OS=Rattus norvegicus OX=10116 GN=Mta2 PE=1 SV=1	2	1	1	1	1	668	74.9	9.67	2.42	1	0	NA	NA	NA	NA	NA	NA	NA	NA	NA	NA	NA	NA
B2GV06	Oxct1	Succinyl-CoA:3-ketoacid coenzyme A transferase 1, mitochondrial OS=Rattus norvegicus OX=10116 GN=Oxct1 PE=1 SV=1	35	13	144	13	1	520	56.2	8.47	351.51	13	0	42706271.83	58993552.55	53913873.45	73325935.2	59305829.5	60505234.03	34965201.51	3639873.467	38909398.4	50674223.55	36372562.93	31987907.04
B2GV08	Ap1s2	AP complex subunit sigma OS=Rattus norvegicus OX=10116 GN=Ap1s2 PE=2 SV=1	28	4	15	3	1	157	18.6	5.47	33.03	4	0	1842530.966	1293895.781	733259.6044	861921.103	1645708.089	815551.9936	2201793.001	530583.528	1833674.994	859002.1282	1107039.218	2395315.07
B2GV14	Txlna	Taxilin alpha OS=Rattus norvegicus OX=10116 GN=Txlna PE=1 SV=1	13	5	33	5	1	557	62.5	6.58	91.98	5	0	1273273.046	861467.4063	1459079.419	1305555.186	1181985.662	595167.7593	3390895.814	1258047.728	2353804.408	1431118.877	1666574.557	4664233.486
B2GV15	Dbt	Dihydrolipoamide acetyltransferase component of pyruvate dehydrogenase complex OS=Rattus norvegicus OX=10116 GN=Dbt PE=1 SV=1	23	10	48	10	1	482	53.2	8.41	111.97	10	0	474718170.6	660025600.5	531288746.9	606406964.7	573537241.5	786701951.9	800888109.8	171202169.9	923287960.5	663592315	581083404.3	457183303.8
B2GV20	Slc25a16	Slc25a16 protein OS=Rattus norvegicus OX=10116 GN=Slc25a16 PE=2 SV=1	4	1	1	1	1	332	36.2	9.82	2.75	1	0	342951.351	416976.3438	906651.5561	934488.6789	427325.9359	403637.2709	259101.7362	623717.2511	NA	NA	NA	NA
B2GV22	Ptdss2	Phosphatidylserine synthase 2 OS=Rattus norvegicus OX=10116 GN=Ptdss2 PE=1 SV=1	11	4	18	4	1	471	54.7	6.58	45.78	4	0	4975382.887	2591570.57	3574407.605	1774947.656	3047525.896	2819171.248	1927731.553	NA	3564204.175	1584254.34	2519166.69	4184878.191
B2GV24	Ufl1	E3 UFM1-protein ligase 1 OS=Rattus norvegicus OX=10116 GN=Ufl1 PE=1 SV=1	25	17	92	17	1	793	89.5	6.99	208.52	17	0	19823923.43	19419735.22	15937580.58	16758445.09	24214837.05	15819033.55	25585328.18	34196012.68	12394030.61	11928712.34	23058908.2	24609776.97
B2GV31	Muc1	Muc1 protein OS=Rattus norvegicus OX=10116 GN=Muc1 PE=2 SV=1	6	3	28	3	1	655	66	5.27	68.21	3	0	25378748.66	36841028.75	16341541.88	18541460	26085759.73	34857239.59	17659579.65	4845397.173	50526526.75	36599503.19	51553444.16	18747540.41
B2GV38	Ubl4a	Ubiquitin-like protein 4A OS=Rattus norvegicus OX=10116 GN=Ubl4a PE=2 SV=1	20	2	3	2	1	157	17.8	8.44	6.95	2	0	58226.33024	NA	100576.0915	76169.43645	74620.54784	66548.81225	630228.1208	57166.79703	493720.4527	151088.5926	372048.4517	373508.6279
B2GV41	Usp39	Ubiquitin specific protease 39 (Predicted), isoform CRA_b OS=Rattus norvegicus OX=10116 GN=Usp39 PE=1 SV=1	3	1	3	1	1	564	65.2	8.9	7.02	1	0	277288.2834	194723.8125	209136.7641	149591.5693	130327.5015	270947.906	323293.2724	270922.6404	958933.5293	NA	379371.4668	269888.4355
B2GV52	Bloc1s5	Biogenesis of lysosome-related organelles complex 1 subunit 5 OS=Rattus norvegicus OX=10116 GN=Bloc1s5 PE=1 SV=1	19	3	9	3	1	187	21.5	8.44	21.16	3	0	4093088.883	2056026.609	1160290.189	463711.9489	2346771.914	1882311.516	5202144.052	1350530.133	2888353.774	2084863.573	2431735.422	1733299.481
B2GV54	Nceh1	Neutral cholesterol ester hydrolase 1 OS=Rattus norvegicus OX=10116 GN=Nceh1 PE=1 SV=1	35	14	218	14	1	408	45.8	7.05	473.25	14	0	45614477.68	47929295.4	52813613.89	41400419.7	51293001.54	49644870.92	21524509.91	4319435.264	27988192.75	34481836.82	63391556.56	55604240.72
B2GV57	Cars2	Cysteinyl-tRNA synthetase 2, mitochondrial OS=Rattus norvegicus OX=10116 GN=Cars2 PE=1 SV=1	19	8	31	8	1	550	60.9	8.29	65.8	8	0	9900624.857	12370473.98	15601269.37	13391162.91	12296075.06	9874221.416	7178478.285	1767970.665	7082365.073	9627126.552	9706137.728	6632031.528
B2GV58	Lsm14a	LSM14A mRNA-processing body assembly factor OS=Rattus norvegicus OX=10116 GN=Lsm14a PE=1 SV=1	7	2	10	2	1	468	51.2	9.52	20.33	2	0	1073645.571	515740.0625	457440.6949	455399.2479	442181.961	476964.4446	2324452.543	613088.2818	424647.5325	539465.1411	521842.5155	1363337.221
B2GV61	#N/A	RGD1560755 protein OS=Rattus norvegicus OX=10116 GN=RGD1560755 PE=1 SV=1	11	1	1	1	1	112	13.1	6.77	2.32	1	0	NA	NA	NA	NA	NA	NA	NA	NA	NA	NA	NA	NA
B2GV63	Chst14	Carbohydrate sulfotransferase OS=Rattus norvegicus OX=10116 GN=Chst14 PE=2 SV=1	4	1	1	1	1	375	43	9.36	2.16	1	0	NA	NA	NA	134329.6259	185943.3379	NA	342969.0116	NA	NA	284781.7325	NA	NA
B2GV65	Higd2a	HIG1 domain family, member 2A OS=Rattus norvegicus OX=10116 GN=Higd2a PE=2 SV=1	18	1	4	1	1	106	11.4	9.79	7.22	1	0	NA	NA	NA	NA	NA	NA	NA	232492.7604	NA	NA	NA	262512.3544
B2GV72	Cbr3	Carbonyl reductase 3 OS=Rattus norvegicus OX=10116 GN=Cbr3 PE=1 SV=1	21	5	28	4	1	277	30.8	6.9	63.72	5	0	2294516.89	3572371.625	12965363.76	11316756.81	5462218.726	8213388.719	3475588.118	856130.8977	4199473.857	8176600.374	4150228.18	1379383.85
B2GV73	Arpc3	Actin-related protein 2/3 complex subunit 3 OS=Rattus norvegicus OX=10116 GN=Arpc3 PE=1 SV=1	21	4	68	4	1	178	20.5	8.6	155.62	4	0	18066889.3	20115002.97	21428122.4	25788823.41	22998344.69	22969812.42	21627585.78	22127382.45	14421590.74	14272740.71	31404633.98	33226204.54
B2GV74	Klc2	Kinesin light chain 2 OS=Rattus norvegicus OX=10116 GN=Klc2 PE=1 SV=1	18	9	27	5	1	622	68.6	7.03	72.8	9	0	1308341.288	589521.375	733352.0231	1537633.972	1346139.816	2994821.347	2154035.625	108460.8208	4308189.528	1713582.917	1161269.553	3599786.24
B2GV75	D2hgdh	D2hgdh protein OS=Rattus norvegicus OX=10116 GN=D2hgdh PE=2 SV=1	12	4	25	4	1	535	58.8	8.13	53.77	4	0	1097284.679	3489580.5	3062043.774	6277491.292	3839914.031	3201543.519	491979.8276	2295335.924	697607.0044	2160152.087	1746799.858	856003.6324
B2GV87	Ptpre	Receptor-type tyrosine-protein phosphatase epsilon OS=Rattus norvegicus OX=10116 GN=Ptpre PE=2 SV=1	8	4	42	4	1	699	80.7	7.02	96.34	4	0	1286743.41	1838818.375	1259783.782	1056408.146	2280378.013	1734300.382	2106110.432	64009.77993	2784842.435	1509274.343	1901203.065	2434256.421
B2GV92	Ptges3	Ptges3 protein OS=Rattus norvegicus OX=10116 GN=Ptges3 PE=1 SV=1	38	6	75	6	1	160	18.7	4.55	195.71	6	0	29243390.8	29598435.52	25168770.39	25664705.39	36201148.87	33895392.42	53929631.65	52254102.38	47577297.37	34846874.35	19865738.19	20770699.15
B2GV94	Fam134c	Fam134c protein OS=Rattus norvegicus OX=10116 GN=Retreg3 PE=1 SV=1	6	2	18	2	1	466	51.5	4.97	41.89	2	0	1616393.021	1727393.375	186670.7564	685088.7894	1780974.493	1598763.322	1663783.967	1014293.666	950625.4379	827870.5663	2290595.871	2525703.831
B2GV97	Sepsecs	O-phosphoseryl-tRNA(Sec) selenium transferase OS=Rattus norvegicus OX=10116 GN=Sepsecs PE=1 SV=1	14	5	5	5	1	504	55.3	7.81	13.11	5	0	158654.0141	315397.6719	162440.8795	201135.7022	129949.9739	NA	1125331.704	5654025.96	1108043.656	1777184.636	1956826.96	2004612.893
B2GV98	Lrch1	Leucine-rich repeats and calponin homology domain-containing 1 OS=Rattus norvegicus OX=10116 GN=Lrch1 PE=1 SV=1	13	6	29	5	1	677	75.2	5.59	68.16	6	1	3347703.959	4349511.438	2547235.701	3019289.296	3623551.007	2195600.666	3501502.423	314972.9489	3368922.173	1969771.61	3386160.862	3806041.996
B2GV99	Myl6	Myl6 protein OS=Rattus norvegicus OX=10116 GN=Myl6 PE=2 SV=1	58	9	378	9	1	152	17	4.65	1070.91	9	0	457841450.2	593975316.2	606490153	496451672.5	474991348.7	535033379.2	859529809.5	128284399.3	943168694.3	869875925.2	613798885.5	529466538.8
B2GVA1	Selenoo	Selenoprotein O OS=Rattus norvegicus OX=10116 GN=Selenoo PE=2 SV=1	6	3	9	3	1	666	74.3	5.59	16.82	3	0	728581.3576	1144093.727	1551107.952	1449781.932	1685284.909	834848.7714	1371653.857	4271318.036	498418.3224	1298665.096	719723.393	629483.211
B2GVA4	Mtus1	Mitochondrial tumor suppressor 1 OS=Rattus norvegicus OX=10116 GN=Mtus1 PE=2 SV=1	6	2	3	2	1	440	50.7	7.55	7.76	2	0	NA	NA	NA	NA	NA	NA	NA	848303.2346	NA	718377.2437	NA	NA
B2GVB7	Apeh	N-acylaminoacyl-peptide hydrolase OS=Rattus norvegicus OX=10116 GN=Apeh PE=2 SV=1	16	8	26	8	1	732	81.3	5.73	56.65	8	0	3748543.953	4773639.031	3377723.669	4075077.084	4825549.545	4848324.479	5258482.339	2479294.436	4377422.234	3594977.465	5387069.584	3776390.387
B2GVB9	Fermt3	Fermitin family member 3 OS=Rattus norvegicus OX=10116 GN=Fermt3 PE=1 SV=1	29	15	165	15	1	665	75.6	7.08	385.11	15	0	16552739.74	23132314.58	27768446.71	24625344.53	22056417.52	40063584.6	20166312	10399396.23	33135196.78	13461482.44	26652951.76	29638983.29
B2RYA8	Dnajb2	DnaJ heat shock protein family (Hsp40) member B2 OS=Rattus norvegicus OX=10116 GN=Dnajb2 PE=1 SV=1	12	3	11	2	1	277	30.7	4.89	28.72	3	0	3610490.761	2660740.75	7181110.546	3468413.403	3737796.299	2164587.952	4834219.834	1338481.41	2907449.167	1452928.32	917125.3387	3151196.585
B2RYB1	Txndc11	Thioredoxin domain-containing 11 OS=Rattus norvegicus OX=10116 GN=Txndc11 PE=1 SV=1	1	1	1	1	1	947	105.8	7.62	1.94	1	0	605722.1074	516018.2188	1287656.402	NA	669947.9196	NA	NA	544397.8542	NA	NA	810825.6969	2068988.656
B2RYB8	Itgb2	Integrin beta OS=Rattus norvegicus OX=10116 GN=Itgb2 PE=1 SV=1	44	28	368	27	1	768	84.8	7.23	908.4	28	1	97474036.75	112326490.2	126236559.6	105416316.3	124882870.4	133099283.7	52027913.68	11537000.4	97546787.86	121468005	138204973.2	136131550.1
B2RYC9	Gba	Glucosylceramidase OS=Rattus norvegicus OX=10116 GN=Gba PE=1 SV=1	19	8	62	8	1	515	57.5	7.39	126.67	8	0	10283294.31	16504501.25	15525933.83	15372931.26	20521726.6	13954690.22	8172520.862	11038956.1	8701969.748	13282146.5	17659684.8	14528368.06
B2RYD0	Ube2g2	Ube2g2 protein OS=Rattus norvegicus OX=10116 GN=Ube2g2 PE=1 SV=1	5	1	1	1	1	165	18.6	4.7	2.08	1	0	2605289.961	2239948.25	2103522.412	2068239.207	2370159.882	2586026.765	1228555.572	6623104.895	1228563.215	1093614.308	2852140.317	2143541.049
B2RYD7	Stt3b	RCG25591, isoform CRA_a OS=Rattus norvegicus OX=10116 GN=Stt3b PE=1 SV=1	19	15	174	15	1	824	93.4	9.01	348.05	15	0	34264597.89	38231309.28	43182437.37	32003394.17	35618867.6	31790165.15	13557332.7	81658997.51	25005522.84	28716834.55	47492741.16	42056648.66
B2RYE8	Fam69a	Fam69a protein OS=Rattus norvegicus OX=10116 GN=Dipk1a PE=2 SV=1	2	1	1	1	1	428	48.9	7.03	1.77	1	0	893077.6729	917088.1875	744631.2026	773146.2904	1120501.346	775282.873	710048.2099	190386.7955	703767.0113	956530.1158	573086.6774	973200.5682
B2RYF1	Ppp1r37	Protein phosphatase 1 regulatory subunit 37 OS=Rattus norvegicus OX=10116 GN=Ppp1r37 PE=1 SV=1	2	1	2	1	1	710	76.9	5.03	6.03	1	0	NA	NA	NA	NA	NA	NA	NA	NA	NA	NA	NA	NA
B2RYF6	Clptm1	CLPTM1, transmembrane protein OS=Rattus norvegicus OX=10116 GN=Clptm1 PE=1 SV=1	10	7	60	7	1	664	75.2	6.01	139.77	7	0	3401735.44	4762563.797	5514088.67	3482552.44	5326035.898	3161076.994	1311689.908	6726836.62	2260569.817	3679151.921	6802601.378	6234375.834
B2RYF7	Wash1	WASH complex subunit 1 OS=Rattus norvegicus OX=10116 GN=Washc1 PE=2 SV=1	12	4	33	4	1	475	51.3	5.52	95.76	4	0	6523883.818	4268747.625	2802602.609	2995362.34	4770855.792	3117111.161	4225748.951	1981072.765	1855864.764	1269206.695	3038799.031	5204967.579
B2RYF8	Cnpy3	Cnpy3 protein OS=Rattus norvegicus OX=10116 GN=Cnpy3 PE=2 SV=1	24	5	18	5	1	276	30.6	6.13	40.92	5	0	5626848.83	4251639.391	6252671.39	7461684.95	5891364.463	5206965.377	3904232.09	5624442.685	1663810.229	2687621.13	3565393.784	4093099.54
B2RYG2	Pck2	Pck2 protein (Fragment) OS=Rattus norvegicus OX=10116 GN=Pck2 PE=2 SV=1	34	18	138	18	1	663	73.2	8	292.73	18	0	22849858.68	35149749.94	41983088.73	44918761.67	34523155.12	39048345.44	23067290.65	10635154.31	20219967.63	48499336.85	43376334.07	28539495.93
B2RYG6	Otub1	Ubiquitin thioesterase OTUB1 OS=Rattus norvegicus OX=10116 GN=Otub1 PE=1 SV=1	33	7	63	7	1	271	31.3	4.94	137.69	7	0	4718895.053	6084924.063	4581267.867	3795834.966	8264715.3	4931781.408	6131023.594	10393970.14	11891268.61	8069954.118	8140398.98	9649614.11
B2RYG9	Clec7a	Clec7a protein (Fragment) OS=Rattus norvegicus OX=10116 GN=Clec7a PE=2 SV=1	5	1	5	1	1	257	29	6.96	13.93	1	0	549151.8549	648187.3125	397108.9819	372397.9745	698583.6049	648701.4345	NA	NA	556963.0579	364966.7316	988451.9428	421742.5958
B2RYH5	Irak1	Interleukin-1 receptor-associated kinase 1 OS=Rattus norvegicus OX=10116 GN=Irak1 PE=1 SV=1	3	2	4	1	1	710	77.8	6.39	7.88	2	0	NA	NA	NA	NA	NA	NA	NA	NA	NA	NA	NA	NA
B2RYH6	Lrch4	Lrch4 protein OS=Rattus norvegicus OX=10116 GN=Lrch4 PE=2 SV=1	14	6	21	5	1	686	73.9	7.34	42.31	6	0	342753.9732	734598.9688	3954812.178	1885460.886	977364.4113	1309582.673	960462.9743	439104.9964	694576.6518	1236722.414	1942403.411	2482316.169
B2RYI0	Wdr91	WD repeat-containing protein 91 OS=Rattus norvegicus OX=10116 GN=Wdr91 PE=2 SV=1	12	7	23	7	1	747	83.1	6.73	57.86	7	0	2636209.501	2580452.969	6822961.376	5071091.839	3472943.069	3144961.841	5143916.065	4230750.809	12003468.56	4359311.59	4884012.606	5389651.936
B2RYI2	Srp68	Signal recognition particle subunit SRP68 OS=Rattus norvegicus OX=10116 GN=Srp68 PE=1 SV=1	36	19	171	19	1	625	70.4	8.57	410.43	19	0	49878157.07	23987652.44	29738835.51	36315750.03	48225444.67	27204938.91	42387332.74	69581081.35	35875590.9	28766347.44	59343410.34	58712221.21
B2RYI6	Snx4	Snx4 protein OS=Rattus norvegicus OX=10116 GN=Snx4 PE=2 SV=1	35	14	121	14	1	450	51.9	5.81	301.97	14	0	31719964.97	17722827	17084170.7	20323601.77	26074234.05	18335628.6	34152878.24	2455051.959	25668177.49	8037382.821	19599434.5	35746896.2
B2RYI7	Wdr41	Wdr41 protein OS=Rattus norvegicus OX=10116 GN=Wdr41 PE=2 SV=1	6	2	4	2	1	460	51.4	5.25	8.04	2	0	NA	NA	NA	169829.9963	118889.8275	NA	262486.3775	169039.9263	NA	NA	347657.8829	NA
B2RYI8	Papss1	Papss1 protein OS=Rattus norvegicus OX=10116 GN=Papss1 PE=2 SV=1	11	5	15	4	1	624	70.7	6.83	33.32	5	0	689804.8984	1012360.844	827337.2677	888858.1685	1542217.084	873570.5857	1728157.899	357363.3948	4368325.207	1545517.397	1728072.246	584386.5839
B2RYJ1	Anapc2	Anapc2 protein OS=Rattus norvegicus OX=10116 GN=Anapc2 PE=1 SV=1	2	1	1	1	1	836	95.3	5.29	2.94	1	0	NA	NA	NA	NA	NA	NA	NA	NA	NA	NA	NA	NA
B2RYJ3	Cul4a	Cullin 4A OS=Rattus norvegicus OX=10116 GN=Cul4a PE=1 SV=1	16	10	23	5	1	759	87.7	8.35	54.3	10	4	10802906.67	14861841.01	21007131.15	11715163.21	9947263.043	16964216.09	10708125.14	9798498.792	21614831.29	7099345.068	25816735.51	57006758.92
B2RYJ4	Aasdhppt	L-aminoadipate-semialdehyde dehydrogenase-phosphopantetheinyl transferase OS=Rattus norvegicus OX=10116 GN=Aasdhppt PE=2 SV=1	5	1	12	1	1	309	35.8	6.65	36.31	1	0	NA	NA	NA	625749.5226	288205.1628	435890.4439	NA	407183.3299	NA	NA	323491.6119	415936.1608
B2RYJ7	Actr1b	ARP1 actin-related protein 1 homolog B OS=Rattus norvegicus OX=10116 GN=Actr1b PE=1 SV=1	35	9	85	4	1	376	42.3	6.4	207.9	9	0	549282.6022	1577707.359	340709.3241	1483775.826	1733014.041	572070.1094	4039626.97	1757226.081	5782564.383	3022150.398	2021850.508	4236425.289
B2RYK3	Spr	RCG56371 OS=Rattus norvegicus OX=10116 GN=Spr PE=1 SV=1	17	3	7	3	1	262	28.1	5.71	18.69	3	0	803134.3605	861995.4375	789058.2319	1690030.239	1323942.315	651148.3553	1498932.403	7101493.695	2096512.365	1222343.763	542784.5629	NA
B2RYL3	Tmem119	RCG21543 OS=Rattus norvegicus OX=10116 GN=Tmem119 PE=1 SV=1	17	3	6	3	1	283	29.8	4.58	16.02	3	0	11141.71668	857110.7969	1392598.881	1057844.266	312687.9098	416171.2557	540697.8398	633214.0613	1297523.641	640524.4288	1953719.298	2941029.288
B2RYL4	Armc6	Armadillo repeat containing 6 OS=Rattus norvegicus OX=10116 GN=Armc6 PE=1 SV=1	7	2	8	2	1	468	50.6	6.21	19.32	2	0	NA	389783.3945	377953.0189	265239.9315	597535.7553	507888.1627	587954.0989	NA	866133.7858	1727361.748	1097263.165	909184.5489
B2RYM3	Itih1	Inter-alpha trypsin inhibitor, heavy chain 1 OS=Rattus norvegicus OX=10116 GN=Itih1 PE=1 SV=1	18	13	89	13	1	904	100.5	6.86	223.65	13	0	10192111.12	11501375.02	10386139.65	8673335.896	12679643.78	9914871.663	34414579.56	18807768.76	40319935.61	39634869.45	42367280.28	32181359.68
B2RYM5	Brcc3	Lys-63-specific deubiquitinase BRCC36 OS=Rattus norvegicus OX=10116 GN=Brcc3 PE=2 SV=1	32	8	26	8	1	291	33	6.27	58.59	8	0	2596502.849	5010810.805	7015770.624	4833777.345	6373888.564	4754905.714	7656326.562	6467678.292	11661929.46	5140361.544	3618739.303	4472672.001
B2RYN1	Fn3krp	Fructosamine-3-kinase-related protein OS=Rattus norvegicus OX=10116 GN=Fn3krp PE=1 SV=1	6	1	1	1	1	309	34.1	7.88	3.08	1	0	NA	NA	NA	NA	NA	NA	NA	NA	NA	NA	NA	NA
B2RYN3	Eef1e1	Eukaryotic translation elongation factor 1 epsilon 1 OS=Rattus norvegicus OX=10116 GN=Eef1e1 PE=1 SV=1	27	4	22	4	1	174	19.8	8.16	71.52	4	0	1867300.465	1470411.484	1230046.04	839722.1186	3521266.297	1455559.162	2926039.182	3137627.838	7678726.157	2976678.945	974895.1693	3277129.461
B2RYN6	Ap1g1	AP-1 complex subunit gamma OS=Rattus norvegicus OX=10116 GN=Ap1g1 PE=2 SV=1	30	19	159	19	1	822	91.3	6.8	309.42	19	0	66229045.89	59422720.88	60660033.9	60953009.5	81805342.79	55134593.42	67994967.59	40377057.06	79552401.54	53127134.93	73299138.01	106693247.8
B2RYN8	Kank3	Ankyrin repeat domain 47 (Predicted) OS=Rattus norvegicus OX=10116 GN=Kank3 PE=1 SV=1	9	7	18	7	1	808	86	5.17	44.88	7	0	17141818.99	10578068.69	9144308.562	6913307.524	7273204.705	10578426.83	9015260.902	466437.4347	3897366.791	5198887.895	4661144.028	11690858.06
B2RYP0	Rhoc	Ras homolog family member C OS=Rattus norvegicus OX=10116 GN=Rhoc PE=1 SV=1	38	9	205	1	1	193	22	6.58	575.22	9	0	1867821.955	1370131.125	NA	NA	1268654.761	160750.4916	3624247.514	1551695.375	4043192.26	694912.0641	2266585.402	4262922.68
B2RYP3	Fam91a1	Fam91a1 protein OS=Rattus norvegicus OX=10116 GN=Fam91a1 PE=1 SV=1	7	5	23	5	1	838	93.5	6.32	45.57	5	0	2044053.685	1783024.516	1463551.881	1035808.706	2240192.74	1393445.247	3972431.049	1887842.019	3637218.69	1245100.161	2579429.929	3694838.513
B2RYP4	Snx2	Sorting nexin 2 OS=Rattus norvegicus OX=10116 GN=Snx2 PE=1 SV=1	39	19	329	18	1	519	58.5	5.12	781.59	19	1	87488990.55	68711920.09	59343482.55	68496428.5	109049537	57940216.52	112261489.9	51993652.25	188409717.3	71905251.01	103156758	168310218.5
B2RYP6	Luc7l2	LUC7-like 2 (S. cerevisiae) OS=Rattus norvegicus OX=10116 GN=Luc7l2 PE=1 SV=1	22	7	74	5	1	392	46.6	10.1	207.93	7	2	39148969	22414747.75	21986379.45	16627628.83	23399087.97	21707144.01	12331190.29	8310739.085	19446230.77	18290453.6	21061207.65	27055809.61
B2RYP8	Tubgcp2	Gamma-tubulin complex component OS=Rattus norvegicus OX=10116 GN=Tubgcp2 PE=1 SV=1	3	2	8	2	1	905	103	6.64	6.29	2	0	88131.49233	77011.79688	NA	28113.2062	129617.946	18503.77451	340398.3232	204945.7457	213416.6145	NA	158056.1813	414348.6924
B2RYQ2	Ptpa	Serine/threonine-protein phosphatase 2A activator OS=Rattus norvegicus OX=10116 GN=Ptpa PE=1 SV=1	21	5	44	5	1	323	36.6	6.29	93.06	5	0	5228247.922	6804289.883	6806198.13	6042384.069	9877440.373	7974236.398	4894249.744	5919574.995	11347917.42	5114462.274	8356518.506	9021265.246
B2RYQ8	Rpl36al	Large subunit ribosomal protein L36a, isoform CRA_a OS=Rattus norvegicus OX=10116 GN=Rpl36a PE=2 SV=1	8	1	8	1	1	106	12.4	10.58	17.69	1	0	15053169.47	8008638.5	3591839.459	7376183	9275918.421	10776187.28	9374072.167	46876406.1	7944910.97	823108.5326	11442379.17	14500112.51
B2RYS0	Cox7a2	Cox7a2 protein OS=Rattus norvegicus OX=10116 GN=Cox7a2 PE=2 SV=1	28	2	46	2	1	83	9.3	10.27	111.41	2	0	28188139.49	24035659.25	44002026.46	40110279.94	7960934.57	18984131.76	16728090.66	33374070.65	8695804.561	8965991.099	17464319.91	13529168.17
B2RYS2	Uqcrb	Cytochrome b-c1 complex subunit 7 OS=Rattus norvegicus OX=10116 GN=Uqcrb PE=1 SV=1	46	6	52	6	1	111	13.6	9.31	115.77	6	0	21057378.79	19875310.19	30274671.84	31497069.53	19532050.46	11469394.77	4650814.129	21492862.43	5216968.569	8677773.392	10675807.59	13748184.36
B2RYS8	Ndufb8	NADH dehydrogenase [ubiquinone] 1 beta subcomplex subunit 8, mitochondrial OS=Rattus norvegicus OX=10116 GN=Ndufb8 PE=1 SV=1	29	4	31	4	1	186	21.9	6.05	77.95	4	0	4508635.973	6011764.844	10956695.1	7576121.975	6738705.894	3464717.425	1825484.185	5459148.025	2485542.885	5913499.942	7392558.797	4262493.215
B2RYS9	Trmt112	Similar to RIKEN cDNA 0610038D11 (Predicted), isoform CRA_b OS=Rattus norvegicus OX=10116 GN=Trmt112 PE=1 SV=1	10	1	12	1	1	125	14.1	5.27	27.21	1	0	841505.2645	1023252.688	2212338.284	1337382.778	1338260.411	1360954.072	1810706.238	2412906.599	1346221.025	4585371.695	2303854.956	1071003.483
B2RYT5	Cox7a2l	Cox7a2l protein OS=Rattus norvegicus OX=10116 GN=Cox7a2l PE=2 SV=1	37	3	6	3	1	113	12.6	9.77	13.08	3	0	1414115.496	1085706.75	1192013.761	1250935.253	1116906.435	554161.5284	1152767.143	NA	159294.35	NA	1826481.161	3171030.224
B2RYT7	Hdhd3	Haloacid dehalogenase-like hydrolase domain-containing 3 OS=Rattus norvegicus OX=10116 GN=Hdhd3 PE=1 SV=1	24	5	13	5	1	251	27.8	7.01	32.89	5	0	290998.6353	2337361.266	1944292.496	3267188.933	2484964.81	1943555.982	1499265.624	11878669.52	713330.5335	1425593.503	1266120.891	1273909.057
B2RYT9	Taco1	Translational activator of cytochrome c oxidase 1 OS=Rattus norvegicus OX=10116 GN=Taco1 PE=2 SV=1	13	2	3	2	1	295	32.7	7.93	7.9	2	0	NA	421178.2813	56006.8082	68469.92558	157930.5028	82674.23604	NA	296116.7764	NA	NA	213651.0673	NA
B2RYU2	Rpl12	RCG45615, isoform CRA_a OS=Rattus norvegicus OX=10116 GN=Rpl12 PE=2 SV=1	59	7	175	7	1	165	17.8	9.42	483.6	7	0	152412113	92810016.44	151028087.2	99824908.02	90499475.81	96978744.42	189259729.9	244762931	125431145.4	70858478.38	143804294	178778990.9
B2RYU6	Trappc2l	Trafficking protein particle complex subunit 2-like protein OS=Rattus norvegicus OX=10116 GN=Trappc2l PE=2 SV=1	19	2	5	2	1	139	16	6.77	12.16	2	0	772992.1449	NA	534690.6101	610538.1554	1012344.655	NA	696642.0243	602397.6212	167084.0845	NA	408200.9174	559126.25
B2RYV2	Nudt16	Nudt16 protein OS=Rattus norvegicus OX=10116 GN=Nudt16 PE=2 SV=1	15	2	8	2	1	195	21.7	7.46	13.87	2	0	319967.6763	335857.1641	303520.2296	224712.9745	305450.265	195407.6481	730097.673	1622737.221	367224.957	471188.9101	NA	421863.6403
B2RYW3	Ndufb9	NADH dehydrogenase (Ubiquinone) 1 beta subcomplex, 9 OS=Rattus norvegicus OX=10116 GN=Ndufb9 PE=1 SV=1	29	4	40	4	1	179	21.9	8.07	84.81	4	0	16632052.41	19582103.97	31981978.73	20976854.63	15349224.07	16229946.72	5474754.658	14216471.1	5661413.911	5925858.924	12534958.79	7496439.829
B2RYW6	#N/A	Uncharacterized protein OS=Rattus norvegicus OX=10116 PE=2 SV=1	17	2	17	1	1	129	14.4	6.02	49.27	2	1	1355530.095	816789.4375	1988225.894	2041090.226	217266.1804	1533124.888	23501102.23	552281.6402	1077128.152	2722159.563	6700715.308	1878558.2
B2RYW7	Srp14	RCG26543, isoform CRA_b OS=Rattus norvegicus OX=10116 GN=Srp14 PE=1 SV=1	21	2	8	2	1	110	12.5	10.17	26.24	2	0	2072306.454	1262413.375	1656526.142	1989655.501	4325634.599	1305157.412	2348247.985	4393679.163	3711542.286	845873.1016	NA	NA
B2RYW8	Minos1	MICOS complex subunit Mic10 OS=Rattus norvegicus OX=10116 GN=Minos1 PE=3 SV=1	11	1	6	1	1	76	8.5	9.25	11.11	1	0	4525940.308	7079677.5	14984327.29	6095178.448	4755040.233	6695970.097	1590604.094	2396109.921	2114193.714	6629139.132	3599429.618	1699289.867
B2RYW9	Fahd2a	Fumarylacetoacetate hydrolase domain-containing protein 2 OS=Rattus norvegicus OX=10116 GN=Fahd2 PE=1 SV=1	31	7	33	7	1	313	34.6	8.35	76.72	7	0	5223166.153	6561027.672	11159335.22	14584346.91	8869261.42	6999646.172	2741104.738	1847833.96	1547330.458	3183956.22	1013956.636	2075425.749
B2RYX1	Uqcr10	LOC685322 protein OS=Rattus norvegicus OX=10116 GN=Uqcr10 PE=2 SV=1	27	1	23	1	1	64	7.5	9.13	71.36	1	0	3379428.381	3976755.313	7593310.056	7161455.446	2754675.929	3785495.5	1898721.365	3717387.161	1758240.94	NA	2663314.287	4125699.949
B2RZ22	Paip1	Paip1 protein (Fragment) OS=Rattus norvegicus OX=10116 GN=Paip1 PE=2 SV=1	8	3	25	3	1	404	46.1	4.54	63.86	3	0	10425623.15	11624889.81	2401646.727	7616179.167	2420691.553	4239456.499	12623769.35	5542950.193	7679419.297	8546978.088	6347868.165	4167211.125
B2RZ27	Sh3bgrl3	SH3 domain binding glutamic acid-rich protein-like 3 OS=Rattus norvegicus OX=10116 GN=Sh3bgrl3 PE=1 SV=1	31	3	30	3	1	93	10.5	5.14	69.1	3	0	10942156.14	13080420.06	11448411.9	14398576.61	9554403.025	9025877.835	14191982.58	NA	7413193.036	9318715.823	11022426.11	9295337.206
B2RZ33	Nck1	Cytoplasmic protein OS=Rattus norvegicus OX=10116 GN=Nck1 PE=2 SV=1	9	3	14	3	1	377	42.8	6.47	29.33	3	0	2036861.075	1379733.875	1528933.368	422895.6214	757357.6428	369936.9603	1354890.563	823853.7688	1207647.422	516207.3393	689946.6218	1005900.669
B2RZ37	Reep5	Receptor expression-enhancing protein 5 OS=Rattus norvegicus OX=10116 GN=Reep5 PE=1 SV=1	18	7	90	7	1	189	21.4	8.12	226.9	7	0	52305681.63	55609886	60398617.7	31677450.51	47309840.9	56330411.51	55392259.8	7715822.585	67353999.46	28432973.55	28694187.35	51757858.87
B2RZ46	Rab17	RAB17, member RAS oncogene family OS=Rattus norvegicus OX=10116 GN=Rab17 PE=2 SV=1	8	1	1	1	1	213	23.3	5.6	2.43	1	0	NA	NA	NA	NA	NA	NA	NA	151022.6337	NA	NA	NA	NA
B2RZ55	Sirt7	NAD-dependent protein deacetylase sirtuin-7 OS=Rattus norvegicus OX=10116 GN=Sirt7 PE=2 SV=1	5	1	1	1	1	402	45.1	9.69	0	1	0	NA	NA	NA	NA	NA	NA	NA	NA	NA	NA	NA	NA
B2RZ62	Ap3s1	AP complex subunit sigma OS=Rattus norvegicus OX=10116 GN=Ap3s1 PE=2 SV=1	22	2	15	2	1	162	18.8	5.08	33.01	2	0	1818387.882	1017706.641	1030340.721	943824.1308	1851820.573	728829.5261	1870860.812	643675.999	1287830.294	729102.1026	251611.4902	442347.901
B2RZ66	Srp19	Signal recognition particle 19 OS=Rattus norvegicus OX=10116 GN=Srp19 PE=1 SV=1	47	5	41	5	1	144	16.1	9.85	133.27	5	0	7119875.729	4750061.75	5170654.255	3237931.075	5227202.258	3238406.962	8595577.184	8537853.077	5118611.971	5422882.458	8080084.074	9404693.69
B2RZ68	Dcaf7	DDB1 and CUL4-associated factor 7 OS=Rattus norvegicus OX=10116 GN=Dcaf7 PE=1 SV=1	8	2	4	2	1	342	38.9	5.52	9.29	2	0	920424.6904	941428.875	645254.2081	683700.9279	1062023.578	334979.1677	995796.488	617547.6679	867090.4316	639220.734	739260.9939	1565762.137
B2RZ72	Arpc4	Actin-related protein 2/3 complex subunit 4 OS=Rattus norvegicus OX=10116 GN=Arpc4 PE=1 SV=1	34	5	82	5	1	168	19.7	8.43	143.36	5	0	40961059.62	36973502	21242773.3	25542689.78	31024288.59	27386809.65	63451199.98	46205517.74	77681773.94	50925011.06	76238326.45	71382804.65
B2RZ74	Snrnp70	Small nuclear ribonucleoprotein U1 subunit 70 OS=Rattus norvegicus OX=10116 GN=Snrnp70 PE=1 SV=1	2	1	4	1	1	451	52.1	9.94	8.14	1	0	2016128.65	324385.8438	592297.7392	711440.4922	305887.7235	314351.0948	NA	421444.9839	372712.4831	333951.1494	602594.114	428567.6755
B2RZ76	Dhrsx	Dehydrogenase/reductase X-linked OS=Rattus norvegicus OX=10116 GN=Dhrsx PE=1 SV=1	15	3	14	3	1	312	33.4	8.24	34.71	3	0	2404986.082	2065575.5	2874905.041	1728427.902	2639942.399	2093180.861	1662923.042	1426191.783	1078025.569	943962.5345	2357730.663	2051594.113
B2RZ77	Dpt	Dermatopontin OS=Rattus norvegicus OX=10116 GN=Dpt PE=1 SV=1	18	4	15	4	1	202	24.2	4.86	32.18	4	0	2675290.157	5001419.75	3983022.778	3334642.127	3870572.919	3575566.947	578158.152	2264880.035	1025417.668	2943779.088	2615661.433	3448620.611
B2RZ79	Iscu	Iron-sulfur cluster assembly enzyme OS=Rattus norvegicus OX=10116 GN=Iscu PE=1 SV=1	22	3	4	3	1	167	18	9.29	9.51	3	0	1818969.518	2744389.563	4000911.662	3175134.438	3298588.824	2214606.706	1214554.767	7905187.233	989646.4313	2032792.182	2000602.664	2796418.285
B2RZ97	Kcmf1	LOC684322 protein OS=Rattus norvegicus OX=10116 GN=Kcmf1 PE=2 SV=1	6	2	11	2	1	381	41.8	5.76	32.13	2	0	854579.5456	645357.8125	NA	1112819.516	1146029.853	NA	2036312.471	1103477.311	4621425.218	1757423.32	1142285.715	1705512.611
B2RZ98	Ncf4	Ncf4 protein OS=Rattus norvegicus OX=10116 GN=Ncf4 PE=1 SV=1	5	1	1	1	1	339	38.7	5.91	3.31	1	0	NA	57505.03516	NA	NA	107384.1903	NA	136255.097	NA	353601.8273	402011.6226	NA	NA
B2RZA3	Fam45a	Fam45a protein (Fragment) OS=Rattus norvegicus OX=10116 GN=Fam45a PE=2 SV=1	21	5	16	5	1	359	40.7	6.58	36.65	5	0	2381689.827	1777525.469	1639955.075	1758219.3	3184421.666	1210144.014	3258291.412	1099143.959	2460660.615	1541406.844	3371703.129	3281844.453
B2RZA4	Ap1m2	RCG31866, isoform CRA_a OS=Rattus norvegicus OX=10116 GN=Ap1m2 PE=2 SV=1	18	8	45	4	1	423	48.2	7.55	88.72	8	0	5071342.708	5306524.469	5523961.832	4065978.193	6365353.025	4777722.517	4280590.764	6467583.33	5026223.219	2139798.913	5447447.6	6623201.324
B2RZA9	Ube2l3	Ube2l3 protein OS=Rattus norvegicus OX=10116 GN=Ube2l3 PE=2 SV=1	47	5	42	5	1	154	17.9	8.51	111.13	5	0	4442577.472	4840444.227	3959612.13	4801472.785	5028037.233	4179210.169	5593311.095	1770266.691	5790802.422	4514658.447	7625550.637	4566301.592
B2RZB3	Eva1b	Eva-1 homolog B OS=Rattus norvegicus OX=10116 GN=Eva1b PE=1 SV=1	10	1	17	1	1	225	24.6	5	50.21	1	0	296680.1468	372443.5625	401217.0288	252698.8756	390620.5448	298669.6868	887674.2131	NA	385798.5173	NA	971801.9789	1035547.571
B2RZB5	Chmp2a	Charged multivesicular body protein 2A OS=Rattus norvegicus OX=10116 GN=Chmp2a PE=1 SV=1	17	3	8	3	1	222	25.1	5.97	19.53	3	0	824402.462	1181736.031	811454.2491	1315749.934	1192460.281	1197100.973	2047167.217	1072143.784	3608445.263	785036.6884	1501193.248	NA
B2RZB6	Lsm8	U6 snRNA-associated Sm-like protein LSm8 OS=Rattus norvegicus OX=10116 GN=Lsm8 PE=1 SV=1	17	1	2	1	1	96	10.4	4.48	2.59	1	0	NA	24439.53125	NA	40135.32909	57564.72296	41595.72155	NA	141733.425	59483.46462	72258.57848	196996.765	NA
B2RZB7	Snrpd1	Small nuclear ribonucleoprotein Sm D1 OS=Rattus norvegicus OX=10116 GN=Snrpd1 PE=1 SV=1	11	1	4	1	1	119	13.3	11.56	10.7	1	0	3559350.079	832352.4375	563840.613	1094698.99	1076422.215	651936.9457	1375269.949	2730657.713	1856806.281	2675301.415	2133859.792	1899943.54
B2RZC6	Ilf2	Ilf2 protein OS=Rattus norvegicus OX=10116 GN=Ilf2 PE=1 SV=1	16	4	17	4	1	390	43	5.26	40.58	4	0	2537661.975	1174236.828	595203.7704	1138054.211	1785975.868	1126368.508	1912465.473	1785297.985	3154373.127	3623460.347	3055565.983	1804246.347
B2RZC9	Krtcap2	Keratinocyte-associated protein 2 OS=Rattus norvegicus OX=10116 GN=Krtcap2 PE=2 SV=2	13	1	23	1	1	136	14.7	9.61	65.4	1	0	875175.1108	1075541.5	510301.8153	416842.361	1371404.907	497579.809	591369.8391	3648610.673	1227531.576	1494351.008	2567750.673	2499528.366
B2RZD1	Sec61b	Protein transport protein Sec61 subunit beta OS=Rattus norvegicus OX=10116 GN=Sec61b PE=1 SV=1	22	2	20	2	1	96	10	11.56	38.85	2	0	41822650.74	41422601.5	67396887.64	38688573.04	39969648.48	48006469.3	13105111.09	48074058.48	14140586.31	17436150.74	31981377.14	38953284.46
B2RZD4	Rpl34	60S ribosomal protein L34 OS=Rattus norvegicus OX=10116 GN=Rpl34 PE=1 SV=1	15	2	20	2	1	117	13.3	11.47	37.91	2	0	32154097.83	15596536	14562949.18	14630976.64	11894268.32	21005518.11	24519904.05	63453986.95	35749619	10116928.87	24519187	37075467.41
B2RZD5	Rpl22l1	RCG41580, isoform CRA_a OS=Rattus norvegicus OX=10116 GN=Rpl22l1 PE=2 SV=1	10	1	12	1	1	122	14.5	9.45	28.31	1	0	6125973.615	2186687	2272864.465	2103214.878	1905040.369	2729870.996	3351441.193	NA	3849120.2	1367475.833	2340547.465	2779437.255
B2RZD6	Ndufa4	NDUFA4, mitochondrial complex-associated OS=Rattus norvegicus OX=10116 GN=Ndufa4 PE=1 SV=1	48	5	48	5	1	82	9.3	9.52	115.14	5	0	49189794.49	45789387.69	119309400.1	58268310.45	37188915.22	42872531.34	27351794.12	71556258.27	27361543.57	23439074.1	35490875.63	35556015.1
B2ZDP8	#N/A	Calcium release-activated calcium modulator 1 OS=Rattus norvegicus OX=10116 GN=ORAI1 PE=2 SV=1	4	1	1	1	1	304	33	7.17	2.39	1	0	405850.516	617553.9375	288477.8587	258055.1195	450610.8482	293314.7625	786406.5179	612415.7563	769643.7955	342209.4078	655432.887	866081.8825
B3DM95	Ptms	Parathymosin OS=Rattus norvegicus OX=10116 GN=Ptms PE=1 SV=1	23	2	29	2	1	102	11.6	4.2	67.54	2	0	9076173.456	8499808.594	14096755.41	9879134.025	11070415	8314871.164	10825525.03	20966435.29	8293770.535	3029087.538	NA	4742686.116
B3DMA0	Tp53i11	Tumor protein p53-inducible protein 11 OS=Rattus norvegicus OX=10116 GN=Tp53i11 PE=1 SV=1	10	2	9	2	1	189	20.9	9.41	19.29	2	0	6873023.875	8634062.938	6730757.613	5519855.418	8775387.984	8120343.166	3458443.56	NA	2832713.715	1313614.55	2427406.16	3702295.136
B3DMA2	Acad11	Acyl-CoA dehydrogenase family member 11 OS=Rattus norvegicus OX=10116 GN=Acad11 PE=1 SV=1	26	15	66	15	1	779	87.3	8.18	142.09	15	0	17182453.61	19250155.23	31002515.8	26508456.89	18293388.79	22089315.91	6890727.589	126728224.2	3488416.791	7123171.046	13461567.13	8121360.079
B3DMA5	Cnot7	CCR4-NOT transcription complex, subunit 7 OS=Rattus norvegicus OX=10116 GN=Cnot7 PE=1 SV=1	8	2	13	2	1	285	32.7	4.84	20.92	2	0	793377.3792	594604.7969	433053.5164	627649.0833	924018.6743	522701.2234	941507.7964	1062932.589	1013041.856	731061.6953	1158691.523	1411544.657
B3GNI6	11-Sep	Septin-11 OS=Rattus norvegicus OX=10116 GN=Sept11 PE=1 SV=1	47	19	320	11	1	431	49.7	6.68	845.62	19	8	139805124.8	154377181	131353981.9	124475865.4	151994227.5	135867736.4	179012886	44294673.66	169228199.2	68025039.46	161573063.7	208054932.7
B3STT9	Kdm1a	Neuroprotective protein 3 OS=Rattus norvegicus OX=10116 GN=Kdm1a PE=2 SV=1	2	1	1	1	1	872	94.5	6.25	0	1	0	NA	NA	NA	NA	NA	NA	NA	NA	NA	NA	NA	NA
B3SVE6	#N/A	Neuroprotective protein 9 (Fragment) OS=Rattus norvegicus OX=10116 PE=2 SV=1	35	5	33	5	1	198	22	6.28	85.48	5	0	6809907.05	4465109.313	6972402.862	7613877.8	5735135.466	3786662.878	4476255.954	3147244.907	6024156.998	7107011.714	4166076.101	4374493.791
B3SVE9	Tecr	Neuroprotective protein 13 OS=Rattus norvegicus OX=10116 GN=Tecr PE=1 SV=1	27	12	107	12	1	308	36.1	9.55	193.16	12	0	82407881.7	78482590.93	117219504.4	81298619.75	83802198.33	97109141.49	28978225.78	233544678.3	36866319.1	35961984.34	84560185.28	68284162.07
B3VPA7	Csad	Cysteine-sulfinate decarboxylase OS=Rattus norvegicus OX=10116 GN=Csad PE=2 SV=1	25	10	15	10	1	493	55.2	7.24	33.83	10	0	152531.1584	660491.75	881633.4262	439984.858	119267.2793	484708.7664	1616153.147	46141681.45	1341895.588	915007.5537	840410.4697	249812.9098
B3Y9H3	S100a10	S100 calcium binding protein A10 OS=Rattus norvegicus OX=10116 GN=S100a10 PE=2 SV=1	33	4	169	4	1	95	11.1	6.77	448.75	4	0	16037457.67	26366518.25	28039054.26	22541317.11	23921656.37	29564532.55	41340409.03	1367561.594	42927044.85	53496219.71	47562252.76	41037907.96
B4F759	Phf5a	PHD finger protein 5A OS=Rattus norvegicus OX=10116 GN=Phf5a PE=2 SV=1	15	1	1	1	1	110	12.4	8.41	2.32	1	0	NA	NA	NA	NA	NA	NA	NA	422718.4922	NA	211402.8087	NA	191458.4545
B4F767	Wwp2	E3 ubiquitin-protein ligase OS=Rattus norvegicus OX=10116 GN=Wwp2 PE=2 SV=1	2	1	1	1	1	870	98.7	7.21	3.32	1	0	98754.97854	93357.00781	NA	115020.9219	156191.6481	152083.4824	NA	NA	114979.7673	NA	168571.1528	202532.5333
B4F768	Aldh4a1	Aldh4a1 protein (Fragment) OS=Rattus norvegicus OX=10116 GN=Aldh4a1 PE=2 SV=1	35	15	118	15	1	572	62.9	8.35	273.7	15	0	56157216.04	76285782.5	84358781.06	101218055.6	74095088.45	85190972.39	28165716.08	231558640.3	24311424.07	60166627.89	24790292.28	25479645.32
B4F775	Gopc	Golgi associated PDZ and coiled-coil motif containing (Predicted) OS=Rattus norvegicus OX=10116 GN=Gopc PE=1 SV=1	6	1	6	1	1	308	34.1	6.54	13.52	1	0	252422.6928	224054.5625	111850.7808	236778.8063	311615.8979	125050.254	646722.6163	409250.7551	476820.9987	437049.5375	404772.0246	943505.5496
B4F779	Appl2	Adaptor protein, phosphotyrosine interaction, PH domain and leucine zipper containing 2 OS=Rattus norvegicus OX=10116 GN=Appl2 PE=1 SV=1	4	2	5	2	1	662	74.1	5.12	11.51	2	0	100567.4621	191271.3906	NA	261199.7571	330899.9051	171719.9666	394218.0849	121879.4735	387356.9335	368744.5341	384192.2823	405926.5292
B4F793	Tnxb	Tnxb protein (Fragment) OS=Rattus norvegicus OX=10116 GN=Tnxb PE=2 SV=1	1	1	2	1	1	1460	158.8	5.14	3.65	1	0	119770.6747	175482.3438	155107.7307	194555.0305	135414.1846	117469.6862	166286.8007	35466.72843	96713.18133	165934.3752	222709.3526	165504.6617
B4F795	Slc44a2	Choline transporter-like protein 2 OS=Rattus norvegicus OX=10116 GN=Slc44a2 PE=2 SV=1	19	12	200	12	1	705	79.8	8.79	430.27	12	0	58475272.28	78784493	32615520.55	47405465.69	64800450.97	71355776.97	38361828.56	6790336.067	53085439.74	34150205.22	64529996.81	61460552.06
B4F7A5	Cd99	CD99 molecule (Xg blood group) OS=Rattus norvegicus OX=10116 GN=Cd99 PE=1 SV=1	25	3	39	3	1	165	16.6	5.12	104.86	3	0	48943203.33	52436861.33	50980415.32	47839677.85	48595352.16	45223939.72	50236058.22	7929332.399	50068774.48	30833785.59	20930323.6	35348578.53
B4F7A9	Csnk2a2	Casein kinase 2 alpha 2 OS=Rattus norvegicus OX=10116 GN=Csnk2a2 PE=1 SV=1	14	4	9	4	1	350	41.2	8.56	19.64	4	0	476161.2574	453108.6875	520870.079	1122908.499	1016875.458	493060.9014	434591.2056	1679431.749	1598462.26	782024.3386	861373.9139	1600232.394
B4F7C2	Tubb4a	Tubulin beta chain OS=Rattus norvegicus OX=10116 GN=Tubb4a PE=1 SV=1	66	23	1258	3	1	444	49.6	4.88	3090.55	23	0	74853.59167	NA	460796.5053	310772.8308	NA	288002.3154	1128423.911	NA	502939.2013	887058.2261	NA	NA
B4F7C7	Hebp1	Hebp1 protein OS=Rattus norvegicus OX=10116 GN=Hebp1 PE=1 SV=1	24	3	29	3	1	190	21.1	5.43	83.25	3	0	2134796.88	4181650.938	1765846.482	3731375.684	3461898.911	1608927.109	3840814.034	4290489.981	3272534.242	1992048.577	4016062.649	3080941.691
B4F7D5	Tmem181	RGD1566403 protein OS=Rattus norvegicus OX=10116 GN=Tmem181 PE=1 SV=1	3	1	2	1	1	475	55.1	6.96	4.54	1	0	NA	NA	NA	NA	NA	NA	NA	NA	430488.4108	351091.9285	364504.3307	NA
B4F7E2	Arsb	Arylsulfatase B OS=Rattus norvegicus OX=10116 GN=Arsb PE=2 SV=1	14	6	37	6	1	528	58.9	6.6	84.92	6	0	13483044.59	11777908.84	12518277.97	19622928.61	12297474.09	14101458.67	4136446.76	13839949.49	3033082.761	7335934.736	7674233.484	4588793.64
B4F7E7	Mpp5	Membrane palmitoylated protein 5 OS=Rattus norvegicus OX=10116 GN=Mpp5 PE=1 SV=1	31	17	96	17	1	675	77.1	6.27	224.22	17	0	13440140.01	20707276.25	13680061.97	11375430.74	17584481.93	14674298.53	19905050.89	1073528.913	22018435.97	8767507.948	11169673.27	12921607.6
B4F7E8	Fam129b	Niban-like protein 1 OS=Rattus norvegicus OX=10116 GN=Fam129b PE=1 SV=1	33	20	277	20	1	747	84.7	5.95	706.39	20	0	125547194.3	150383028.9	117148161.4	103841648.5	137674161.2	79902442.92	104950473.3	1959432.183	116254062.9	63738913.19	94655670.25	120358222.7
B4F7F3	Arvcf	ARVCF, delta catenin family member OS=Rattus norvegicus OX=10116 GN=Arvcf PE=1 SV=1	6	4	10	4	1	973	105.4	6.57	24.92	4	0	336940.64	1144255.664	18868.9535	23766.59104	412488.9644	284434.1497	36720.19375	1129037.925	940873.1931	721863.9967	300870.9542	872633.7144
B5DEF4	Dram1	DNA-damage-regulated autophagy modulator 1 OS=Rattus norvegicus OX=10116 GN=Dram1 PE=2 SV=1	6	1	5	1	1	238	26.2	5.74	8.32	1	0	1259974.205	1278567.5	1227511.883	NA	1152566.984	NA	NA	NA	888263.4233	725307.1202	NA	625056.6933
B5DEF5	Slc39a1	Slc39a1 protein OS=Rattus norvegicus OX=10116 GN=Slc39a1 PE=2 SV=1	4	1	10	1	1	324	34.3	5.69	24.73	1	0	460092.4507	450907.5	1038116.061	314470.7798	666597.178	573545.4741	NA	405192.2865	780781.8195	836618.3737	719130.9287	825234.6771
B5DEF6	Acad10	RGD1310159 protein OS=Rattus norvegicus OX=10116 GN=RGD1310159 PE=2 SV=1	1	1	1	1	1	1069	119.2	8.44	2.03	1	0	204335.8202	368116.7813	347744.1017	327299.0234	320849.0613	544461.9578	335896.3762	845704.633	115527.3833	324693.2262	261983.5271	NA
B5DEG1	Itga8	Integrin subunit alpha 8 OS=Rattus norvegicus OX=10116 GN=Itga8 PE=1 SV=1	4	4	34	4	1	1062	117.5	5.53	80.07	4	0	11261752.42	18133098.5	11930468.21	10353590.13	14376736.11	14015249.11	14307117.54	1899537.069	13724577.1	9997401.747	12456548.68	11339055.75
B5DEG8	Sec24c	LOC685144 protein OS=Rattus norvegicus OX=10116 GN=Sec24c PE=1 SV=1	28	21	178	21	1	1095	118.4	7.06	379.35	21	0	21224410.47	20011931.37	17646213.53	16967962.37	31563141.39	16814684.9	25671789.8	8658067.003	22437165.55	22256647.27	20970085.47	28455992.77
B5DEG9	Pear1	Pear1 protein OS=Rattus norvegicus OX=10116 GN=Pear1 PE=2 SV=1	1	1	1	1	1	1033	110.3	6.8	2.1	1	0	NA	NA	NA	NA	15057.07103	178257.4658	NA	NA	NA	NA	109465.7075	NA
B5DEH0	Limd1	LIM domain-containing protein 1 OS=Rattus norvegicus OX=10116 GN=Limd1 PE=1 SV=1	3	1	1	1	1	663	71.3	6.29	1.85	1	0	NA	NA	NA	NA	NA	NA	NA	NA	NA	NA	NA	NA
B5DEH2	Erlin2	Erlin-2 OS=Rattus norvegicus OX=10116 GN=Erlin2 PE=1 SV=1	47	15	160	13	1	339	37.7	5.74	382.66	15	1	66110885.47	62472073.19	69878966.19	64488742.96	76051082.26	58882471.97	32732144.46	61293057.72	37950963.81	47057185.95	51102669.38	62312754.34
B5DEH4	Uap1l1	UDP-N-acetylglucosamine pyrophosphorylase 1-like 1 OS=Rattus norvegicus OX=10116 GN=Uap1l1 PE=1 SV=1	9	3	8	3	1	507	56.4	5.66	16.58	3	0	244722.8784	375104.5742	196687.9767	204964.3934	682701.2106	223471.9549	1583719.709	465708.8904	1400668.657	363381.3366	480348.6221	529894.8214
B5DEH6	Atp13a2	Cation-transporting ATPase OS=Rattus norvegicus OX=10116 GN=Atp13a2 PE=2 SV=1	1	1	1	1	1	1145	124.7	8.15	2.81	1	0	NA	NA	NA	NA	NA	NA	NA	NA	NA	NA	NA	NA
B5DEH7	C1r	C1r protein OS=Rattus norvegicus OX=10116 GN=C1r PE=1 SV=1	7	4	15	4	1	707	80.4	6.24	39.85	4	0	1238240.428	846559.0156	578328.3818	733293.8112	715269.3998	559559.5889	292172.8057	2067138.626	668080.1775	1764518.638	2751631.206	2667593.256
B5DEI0	Pcyox1l	Pcyox1l protein OS=Rattus norvegicus OX=10116 GN=Pcyox1l PE=2 SV=1	12	6	31	6	1	494	54.6	7.65	58.04	6	0	8947376.518	7272983.438	6106441.153	7945014.228	11473947.92	7859070.011	5522481.015	49921.36267	3609335.76	8320810.436	9864453.93	8890827.586
B5DEJ5	Eefsec	Eefsec protein OS=Rattus norvegicus OX=10116 GN=Eefsec PE=1 SV=1	13	6	23	6	1	583	63.6	8.29	50.08	6	0	2113443.098	1897962.781	2508272.006	794875.1068	1463534.479	2227230.768	2584921.971	9034777.762	3519022.761	3397211.929	4203843.788	3763690.599
B5DEJ9	Sbf2	LOC691036 protein OS=Rattus norvegicus OX=10116 GN=Sbf2 PE=2 SV=1	2	3	8	3	1	1826	205.4	7.21	9.48	3	0	1268763.895	125415.4297	735875.5937	649114.3155	655959.3432	633381.071	109568.8019	NA	257094.9294	147407.7395	396254.5694	580677.9653
B5DEL7	Sec61g	RCG23282, isoform CRA_a OS=Rattus norvegicus OX=10116 GN=Sec61g PE=1 SV=1	29	2	20	2	1	68	7.7	9.99	47.17	2	0	288406.4238	593435.125	1334616.734	1043204.958	855756.9308	448622.2913	3097925.244	2281473.613	298654.3708	187314.1003	759876.1301	2135094.546
B5DEL8	Ndufs5	NADH dehydrogenase (Ubiquinone) Fe-S protein 5 OS=Rattus norvegicus OX=10116 GN=Ndufs5 PE=1 SV=1	44	4	46	4	1	106	12.7	8.92	71.68	4	0	14758468.19	16903661.47	27531703.86	20917991.44	17367336.34	10876287.95	6941848.068	7939173.726	5039189.929	15603340.83	12795922.87	7685196.683
B5DEL9	Rps7	40S ribosomal protein S7 OS=Rattus norvegicus OX=10116 GN=Rps7 PE=2 SV=1	30	6	43	6	1	194	22.1	10.1	97.16	6	0	40168839.88	25318457.63	40226848.41	29970247.63	25909579.01	35230443.4	67689623.52	88987102.82	54654016.57	45202715.92	46357242.88	45987478
B5DEM3	Tmed4	Tmed4 protein OS=Rattus norvegicus OX=10116 GN=Tmed4 PE=2 SV=1	28	5	63	4	1	227	26.1	8.59	151.34	5	0	11836941.9	7201856.641	7736646.363	13317027.87	14421354.98	14367117.78	2833917.749	9351692.78	8373169.046	12562082.16	11620266.73	12071990.69
B5DEM5	Rpl14	60S ribosomal protein L14 OS=Rattus norvegicus OX=10116 GN=Rpl14 PE=1 SV=1	28	6	62	6	1	219	23.8	11.12	114.09	6	0	83916429.81	49761106.66	63141574.87	46263396.79	59826665.9	51636254.77	94147732.41	154129258	67215543.02	19206329.36	93653012.19	104709615.2
B5DEN5	Eef1b2	Eukaryotic translation elongation factor 1 beta 2 OS=Rattus norvegicus OX=10116 GN=Eef1b2 PE=1 SV=1	39	5	54	5	1	225	24.7	4.72	154.59	5	0	5572925.159	8237637.688	7621085.868	7485974.214	10417459.67	5714522.189	16341797.62	27533506.47	11584783.81	10882891.81	18948267.62	15464651.95
B5DEP2	Rab25	RAB25, member RAS oncogene family OS=Rattus norvegicus OX=10116 GN=Rab25 PE=2 SV=1	18	4	18	3	1	213	23.4	5.96	31.83	4	0	2343930.706	1164250.063	2568325.936	883516.8981	2108102.843	1084361.387	966376.5072	NA	2554104.21	989512.0123	1260227.026	1003751.739
B5DEQ4	Snrpb2	RCG27500, isoform CRA_c OS=Rattus norvegicus OX=10116 GN=Snrpb2 PE=1 SV=1	5	1	1	1	1	225	25.3	9.72	2.91	1	0	NA	NA	NA	NA	NA	NA	NA	NA	NA	NA	NA	NA
B5DER3	Iah1	Hypertrophic agonist responsive protein B64, isoform CRA_b OS=Rattus norvegicus OX=10116 GN=Iah1 PE=2 SV=1	10	2	8	2	1	249	28	5.95	17.13	2	0	2115471.344	3038354.438	4639910.674	4465087.194	3863305.772	3643617.286	2199034.522	1760586.672	2517379.568	1436119.784	3216973.408	1994224.649
B5DES0	Snrpd2	Small nuclear ribonucleoprotein Sm D2 OS=Rattus norvegicus OX=10116 GN=Snrpd2 PE=1 SV=1	40	5	10	5	1	118	13.5	9.91	21.69	5	0	9493230.345	2263552.875	384976.9753	1809903.375	2409779.879	1778973.725	2167755.072	8467887.451	1178360.482	843686.6999	NA	974012.8486
B5DES1	Rpl23a	RCG33340 OS=Rattus norvegicus OX=10116 GN=Rpl23a PE=2 SV=1	42	8	158	8	1	156	17.7	10.45	384.97	8	0	125541940.2	70947647	34540634.84	71038140.6	67745491.16	84304286.63	116939378.1	206133564.1	110041815.4	61458018.24	164168457.3	162126717.6
B5DEX3	Cpne8	Copine 8 OS=Rattus norvegicus OX=10116 GN=Cpne8 PE=1 SV=1	5	2	18	1	1	577	64.6	5.97	32.3	2	0	130633.3784	164065.0313	69650.35409	78015.29479	126532.692	61802.04312	1021896.755	241755.4473	1388643.097	398715.8965	472771.4973	1057409.245
B5DEX4	Vasp	Vasp protein OS=Rattus norvegicus OX=10116 GN=Vasp PE=2 SV=1	31	10	48	10	1	376	39.7	8.68	105.63	10	0	12048847.98	13382093.69	11813259.18	9739301.576	10217271.02	16093478.81	15537817.44	830699.7442	17517878.76	4675537.681	13807770.78	19651737.58
B5DEY8	Snx6	Sorting nexin OS=Rattus norvegicus OX=10116 GN=Snx6 PE=1 SV=1	40	17	174	16	1	406	46.6	6.16	393.5	17	2	38996315.54	24887653.03	20624618.18	20672733.7	31854930.03	25670975.72	43089466.28	9794229.486	66595597.07	24112972.56	36595298.99	75334900.64
B5DEZ0	Epb41l4a	Erythrocyte membrane protein band 4.1-like 4A OS=Rattus norvegicus OX=10116 GN=Epb41l4a PE=2 SV=1	3	1	1	1	1	504	57.5	10.02	2.72	1	0	NA	NA	NA	NA	NA	NA	NA	NA	NA	NA	NA	NA
B5DEZ3	Ccdc126	Ccdc126 protein OS=Rattus norvegicus OX=10116 GN=Ccdc126 PE=1 SV=1	9	1	1	1	1	140	15.5	10.05	1.86	1	0	22616.38412	64831.58984	7186.694514	11317.12266	102740.4974	NA	168294.3315	63657.10745	37576.72502	NA	NA	NA
B5DEZ8	Plxdc2	Plexin domain containing 2 (Predicted) OS=Rattus norvegicus OX=10116 GN=Plxdc2 PE=1 SV=1	15	7	73	7	1	530	59.4	6.62	186.57	7	0	10350775.54	11192513.53	13470413.33	8487033.642	11622899.44	9484219.045	9983340.672	214665.2417	9716073.829	10336001.62	8167316.305	15643101.1
B5DF01	Vps11	Vps11 protein (Fragment) OS=Rattus norvegicus OX=10116 GN=Vps11 PE=2 SV=1	14	11	61	11	1	903	103.6	7.01	140.02	11	0	57025153.24	55270516.03	76720232.94	76682934.7	63835950.73	116567025.3	37373618.21	8462643.684	34180355.32	14569659.68	63262950.08	51290926.04
B5DF05	Rasip1	Ras interacting protein 1 (Predicted), isoform CRA_a OS=Rattus norvegicus OX=10116 GN=Rasip1 PE=1 SV=1	26	11	146	11	1	619	67.8	5.44	366.94	11	0	117252992.9	105510333.6	114554499.4	166126995.5	113713108.5	114044860.9	44081883.16	18079167.64	12979868.85	42145351.97	27862910.53	51651234.91
B5DF26	Osbpl8	Oxysterol-binding protein-like 8 OS=Rattus norvegicus OX=10116 GN=Osbpl8 PE=1 SV=1	19	2	13	1	1	144	16.2	7.28	38.24	2	0	NA	NA	NA	NA	NA	NA	NA	NA	NA	NA	NA	NA
B5DF46	Pmm2	Phosphomannomutase OS=Rattus norvegicus OX=10116 GN=Pmm2 PE=1 SV=1	10	2	7	2	1	242	27.7	7.3	15.06	2	0	1901359.311	1061026.75	1820495.45	1331251.656	2177242.619	1414249.049	1857950.253	1205049.671	2627090.623	3140793.014	438118.7079	839492.1209
B5DF47	Krit1	KRIT1, ankyrin repeat containing OS=Rattus norvegicus OX=10116 GN=Krit1 PE=2 SV=1	3	1	1	1	1	736	84	8.34	1.83	1	0	NA	NA	NA	NA	NA	NA	NA	NA	NA	NA	NA	NA
B5DF48	Tyw1	Radical S-adenosyl methionine and flavodoxin domains 1 (Predicted), isoform CRA_a OS=Rattus norvegicus OX=10116 GN=Tyw1 PE=1 SV=1	1	1	1	1	1	724	82	7.58	2.02	1	0	271725.2834	296334.5313	305126.0229	224108.0071	290125.511	270734.7734	175970.2327	514904.3426	140649.5213	194510.1737	409472.8738	303297.1416
B5DF50	Galnt2	Polypeptide N-acetylgalactosaminyltransferase (Fragment) OS=Rattus norvegicus OX=10116 GN=Galnt2 PE=2 SV=1	19	9	40	9	1	569	64.4	8.62	100.33	9	0	10513610.43	13021564.31	15000645.65	11956027.09	18344163.21	13950049.25	10917915.25	5792016.319	9975657.281	7701659.151	11290986.24	10131011.46
B5DF51	Mmgt1	Membrane magnesium transporter 1 OS=Rattus norvegicus OX=10116 GN=Mmgt1 PE=2 SV=1	18	1	3	1	1	131	14.7	9.16	8.91	1	0	NA	NA	NA	NA	NA	NA	NA	NA	NA	NA	NA	NA
B5DF55	Stam	RCG55706 OS=Rattus norvegicus OX=10116 GN=Stam PE=1 SV=1	6	3	13	2	1	547	59.6	4.86	28.78	3	1	3516637.749	4685698.438	4485680.826	3881830.849	5066252.898	5198415.914	5919648.049	2408385.446	5770691.501	4812486.18	4303489.823	4147482.408
B5DF57	Epb42	Erythrocyte membrane protein band 4.2 OS=Rattus norvegicus OX=10116 GN=Epb42 PE=1 SV=1	33	21	205	21	1	689	76.5	7.23	541.37	21	0	100483629.2	106638100.8	70711204.41	51482795.61	157689966.9	215506764.7	31625033.07	5899796.899	31244604.16	24072016.46	28893854.46	26833149.6
B5DF60	Eif1ax	Eukaryotic translation initiation factor 1A, X-linked OS=Rattus norvegicus OX=10116 GN=Eif1ax PE=1 SV=1	25	3	28	3	1	144	16.5	5.24	48.04	3	0	17295621.56	6943410.5	11452595.18	9227673.413	9489760.004	7553062.595	25373194.04	14656984.35	13604643.16	8089857.147	13637520.1	17486763.96
B5DF62	Pak4	Non-specific serine/threonine protein kinase OS=Rattus norvegicus OX=10116 GN=Pak4 PE=1 SV=1	2	1	2	1	1	593	64.7	9.8	5.31	1	0	320262.4392	334100.7813	490153.8861	340602.9994	407869.8989	516771.3883	559702.0564	154030.6616	407238.0887	243784.7459	320881.0859	424427.038
B5DF65	Blvrb	Biliverdin reductase B OS=Rattus norvegicus OX=10116 GN=Blvrb PE=1 SV=1	49	7	97	7	1	206	22.1	6.8	261.97	7	0	21456766.52	30534554.58	33022377.54	29837196.17	33781519.39	26892742.57	39674658.37	79506992.36	64863333.94	47081630.82	33641130.83	33735609.89
B5DF74	Osbpl11	Oxysterol-binding protein OS=Rattus norvegicus OX=10116 GN=Osbpl11 PE=1 SV=1	3	2	20	2	1	754	83.9	7.18	32.38	2	0	1189485.061	1022435.969	924505.4179	1268249.491	1266394.697	736995.8602	1722006.461	1291961.867	2306953.233	1118385.137	1651663.874	1832920.307
B5DF79	Rnaset2	Rnaset2 protein OS=Rattus norvegicus OX=10116 GN=Rnaset2 PE=2 SV=1	15	3	41	3	1	329	38	6.15	136.19	3	0	7625644.034	8984442.016	9743348.32	10859613.77	9348676.329	12239586.74	7088141.672	12953225.45	6916458.181	21281938.26	21673285.77	6177678.327
B5DF86	Cog8	Conserved oligomeric Golgi complex subunit 8 OS=Rattus norvegicus OX=10116 GN=Cog8 PE=1 SV=1	5	2	2	2	1	634	70.7	5.01	2.42	2	0	122141.4344	170028.0156	147524.076	150989.1332	266997.1195	137243.8361	324199.7332	212768.1531	387697.7756	228146.1	292773.1026	423811.426
B5DF88	Nagpa	N-acetylglucosamine-1-phosphodiester alpha-N-acetylglucosaminidase OS=Rattus norvegicus OX=10116 GN=Nagpa PE=2 SV=1	6	2	4	2	1	517	55.8	6.16	10.15	2	0	487527.2097	589774.5625	487570.2934	476598.6903	581001.581	521144.3113	1105037.078	609957.763	442351.5272	793012.7927	1186212.216	1245945.915
B5DF89	Cul3	Cullin-3 OS=Rattus norvegicus OX=10116 GN=Cul3 PE=1 SV=2	18	11	56	11	1	768	88.9	8.48	135.5	11	0	5688540.833	4718356.945	1538036.134	3707064.323	5478089.898	3678908.182	5424701.324	5732190.091	8554425.693	3689001.773	7672135.458	6846815.175
B5DF91	Elavl1	ELAV-like protein 1 OS=Rattus norvegicus OX=10116 GN=Elavl1 PE=1 SV=1	13	3	12	3	1	326	36.1	9.04	26.44	3	0	1694764.971	2695920.234	686481.0784	995895.4118	2564491.457	2376812.865	6638143.772	5962931.096	5299749.829	1466381.07	2571078	2354356.687
B5DF98	Map3k3	Map3k3 protein OS=Rattus norvegicus OX=10116 GN=Map3k3 PE=1 SV=1	5	3	20	2	1	626	70.6	8.87	34.4	3	0	259899.2283	2122193.453	318774.3565	290085.0572	NA	166381.0085	2205889.479	2583251.463	2879251.71	333224.6825	1885836.681	1600314.787
B5DFA3	Acsm1	Bucs1 protein OS=Rattus norvegicus OX=10116 GN=Acsm1 PE=2 SV=1	52	22	43	22	1	577	65.3	7.65	115.29	22	0	2553811	2660471.25	2328511.275	2410180.109	2523579.041	2116022.031	2692932.455	224365759.7	4713732.586	2241762.409	1756489.39	2708258.14
B5DFB0	P3h3	Leprecan-like 2 (Predicted), isoform CRA_b OS=Rattus norvegicus OX=10116 GN=P3h3 PE=2 SV=1	5	2	6	2	1	548	62.2	5.4	2.14	2	0	118351.9058	422107.1563	835516.4073	575013.0282	514706.1905	618057.4994	NA	NA	738162.4125	1038873.059	1032349.728	652955.1238
B5DFB4	Ttc7b	Tetratricopeptide repeat domain 7B OS=Rattus norvegicus OX=10116 GN=Ttc7b PE=2 SV=1	5	3	5	3	1	585	64.9	6.49	8.1	3	0	1555844.058	770923.25	537005.2425	2163984.569	1390616.944	400890.7707	1606997.719	207294.04	803372.834	1371299.605	1590677.907	1479442.267
B5DFC3	Sec23a	Protein transport protein SEC23 OS=Rattus norvegicus OX=10116 GN=Sec23a PE=1 SV=1	36	21	233	18	1	765	86.1	7.08	655.8	21	4	46467497.05	39496308.98	33942805.65	32847352.17	54704124.5	54875117.64	48397798.13	71470982.7	57130264.72	45567325.01	75686681.75	60610805.27
B5DFC4	Prkca	Protein kinase C OS=Rattus norvegicus OX=10116 GN=Prkca PE=2 SV=1	19	10	36	5	1	672	76.7	7.05	64.17	10	3	7620354.323	8888226.438	10014688.56	4305083.264	6115590.795	15459686.04	8990464.928	8057060.775	17956875.46	9407519.267	6359312.269	12948646.02
B5DFC6	Gnpda1	Glucosamine-6-phosphate isomerase OS=Rattus norvegicus OX=10116 GN=Gnpda1 PE=2 SV=1	8	2	2	2	1	289	32.6	6.74	4.35	2	0	NA	NA	NA	NA	NA	NA	NA	NA	NA	NA	NA	NA
B5DFC8	Eif3c	Eukaryotic translation initiation factor 3 subunit C OS=Rattus norvegicus OX=10116 GN=Eif3c PE=1 SV=1	22	20	216	20	1	911	105.4	5.78	498.97	20	0	73896248.81	27085180.94	32050020	33840431.04	26137602.48	19014724.88	96070767.72	59404235	105495638.6	30241925.22	52743564.1	77558332.11
B5DFD1	Nudcd1	NudC domain containing 1 OS=Rattus norvegicus OX=10116 GN=Nudcd1 PE=2 SV=1	2	1	1	1	1	580	66.3	5.43	2.12	1	0	NA	NA	NA	NA	NA	198125.312	NA	996179.5822	851337.6578	1001196.398	NA	NA
B5DFD6	Tie1	Tie1 protein OS=Rattus norvegicus OX=10116 GN=Tie1 PE=2 SV=1	2	2	4	1	1	1137	125.1	7.01	9.41	2	0	NA	NA	NA	NA	NA	NA	NA	NA	NA	NA	NA	NA
B5DFD8	Sh3bgrl	SH3 domain-binding glutamic acid-rich-like protein OS=Rattus norvegicus OX=10116 GN=Sh3bgrl PE=1 SV=1	50	6	37	6	1	114	12.8	5.07	99.46	6	0	5206122.128	7676993.617	9436288.309	11479265.66	9560429.65	9854642.038	14009403.72	1318940.782	11436946.87	5923228.157	6643740.998	5860973.839
B5DFE0	Mpp6	Membrane palmitoylated protein 6 OS=Rattus norvegicus OX=10116 GN=Mpp6 PE=1 SV=1	20	9	14	8	1	540	60.9	6.18	31.52	9	1	5545013.812	9461655.453	6347692.2	6780855.443	9344011.856	9431047.011	6208251.425	20546586.98	8492414.11	4642250.924	5502389.875	6309650.04
B5DFF4	Vps37c	VPS37C, ESCRT-I subunit OS=Rattus norvegicus OX=10116 GN=Vps37c PE=1 SV=1	9	2	10	2	1	353	38.4	5.21	24.76	2	0	402049.0448	NA	405501.4491	354828.3111	432190.9976	626941.9187	865590.0807	235917.9014	984795.2449	431700.4294	NA	839077.019
B5DFG9	Pik3ap1	Pik3ap1 protein OS=Rattus norvegicus OX=10116 GN=Pik3ap1 PE=2 SV=1	2	1	1	1	1	812	91	5.2	1.8	1	0	50637.74449	96708.53906	NA	NA	147035.5917	NA	365741.6125	1121578.522	367207.2182	656047.3217	577456.6046	399482.1539
B5DFH2	Map1s	BPY2 interacting protein 1 (Predicted), isoform CRA_b OS=Rattus norvegicus OX=10116 GN=Map1s PE=2 SV=1	11	8	39	8	1	972	102.7	7.11	79.94	8	0	3158605.645	1707718.484	1921172.037	1923142.106	1898476.012	2332120.585	6791257.368	1258234.972	7945712.046	3180304.078	3325456.688	6671065.914
B5DFH7	Traf2	Tnf receptor-associated factor 2 OS=Rattus norvegicus OX=10116 GN=Traf2 PE=1 SV=1	3	1	6	1	1	497	55.5	6.99	15.14	1	0	138371.8833	NA	272308.5028	407932.6827	196854.5664	145265.653	439666.5345	416582.0177	392687.4903	304614.2016	357699.6522	535169.7569
B5DFI3	Ap1s1	AP complex subunit sigma OS=Rattus norvegicus OX=10116 GN=Ap1s1 PE=1 SV=1	27	4	29	3	1	158	18.7	5.73	58.5	4	1	6294077.341	5454610.375	3625034.939	3874484.799	6290093.023	3685522.305	4588688.755	3118818.225	3926121.168	2183301.015	4405471.465	8565740.824
B5DFI9	Pdk3	Pdk3 protein OS=Rattus norvegicus OX=10116 GN=Pdk3 PE=2 SV=1	13	4	19	3	1	415	47.9	8.81	50.79	4	0	1570770.877	1730148.188	1439776.762	2099292.327	2235270.173	967256.8859	965132.0445	107720.7116	651617.3448	1437891.624	736363.6655	2076943.337
B5DFJ2	Fam3a	Fam3a protein OS=Rattus norvegicus OX=10116 GN=Fam3a PE=1 SV=1	5	1	2	1	1	227	25.1	8.44	4.67	1	0	NA	1076730.125	NA	NA	849133.8513	NA	1095957.749	1455920.344	NA	NA	1345743.468	903890.2524
B5DFJ4	Vps18	VPS18 CORVET/HOPS core subunit OS=Rattus norvegicus OX=10116 GN=Vps18 PE=1 SV=1	18	14	80	14	1	973	110.1	6.07	179.46	14	0	21254235.26	17065167.76	28785187.42	22535469.97	21332535.1	22298747.03	15581178.72	7639446.896	24641415.55	23634169.7	31633613.6	27920739.01
B5DFK0	Mboat7	Leng4 protein OS=Rattus norvegicus OX=10116 GN=Mboat7 PE=2 SV=1	12	3	18	3	1	473	53.3	8.56	40.96	3	0	3487067.763	2767790.813	3184779.521	3493453.428	4206236.243	4794711.023	1522155.237	2467454.819	2603226.977	4903016.604	3527574.169	4226855.722
B5DFK6	Ap3d1	Adaptor-related protein complex 3 subunit delta 1 OS=Rattus norvegicus OX=10116 GN=Ap3d1 PE=1 SV=1	28	25	221	25	1	1204	135.6	7.15	523.9	25	0	45971204.8	35292569.97	60206019.36	55068703.07	45351696.69	44755926.1	39660107.13	17052157.65	31384337.02	47250826.28	41052120.43	43268340.65
B5DFK7	Abhd17c	Alpha/beta hydrolase domain-containing protein 17C OS=Rattus norvegicus OX=10116 GN=Abhd17c PE=1 SV=1	3	1	3	1	1	320	35.1	5.64	5.14	1	0	36952.58164	83035.63281	NA	NA	82400.24815	NA	192718.5688	NA	99467.56322	NA	156647.6586	309381.1895
B5DFL6	Cmtm3	CKLF-like MARVEL transmembrane domain containing 3 (Predicted) OS=Rattus norvegicus OX=10116 GN=Cmtm3 PE=1 SV=1	8	1	10	1	1	184	20.3	4.91	16.42	1	0	NA	930914.9375	629711.4539	508268.0095	922837.5692	NA	879475.1363	NA	886600.6208	950001.1665	1136928.752	1718799.566
B5DFL9	Sestd1	SEC14 and spectrin domain-containing 1 OS=Rattus norvegicus OX=10116 GN=Sestd1 PE=1 SV=1	2	1	3	1	1	696	79.4	5.1	6.74	1	0	NA	NA	NA	NA	NA	NA	NA	NA	NA	NA	NA	NA
B5DFM3	Ly6h	Ly6h protein (Fragment) OS=Rattus norvegicus OX=10116 GN=Ly6h PE=2 SV=1	7	1	1	1	1	181	19	8.75	2.87	1	0	NA	NA	NA	NA	NA	NA	NA	NA	NA	1344899.454	NA	NA
B5DFN2	Ahcyl1	S-adenosylhomocysteine hydrolase-like protein 1 OS=Rattus norvegicus OX=10116 GN=Ahcyl1 PE=1 SV=2	24	10	89	9	1	483	53.7	7.44	193.76	10	0	15396664.01	15930303.69	19970557.5	18451077.84	16626242.86	18423105.45	18811567.82	4436616.193	30021199.63	23305036.95	22845895.84	23062585.79
B5DFN4	Pfdn5	Prefoldin 5 (Predicted), isoform CRA_a OS=Rattus norvegicus OX=10116 GN=Pfdn5 PE=1 SV=1	30	4	10	4	1	154	17.3	6.33	22.41	4	0	6077158.965	7053843	6537507.437	5257326.682	8499084.433	6996962.905	7578773.492	14180961.19	8865739.146	4391762.771	7248349.106	6183890.732
B6DYP7	Gsta2	Glutathione S-transferase alpha 2 OS=Rattus norvegicus OX=10116 GN=Gsta2 PE=2 SV=1	38	9	68	2	1	222	25.6	8.79	145.08	9	3	20261590.68	22477306.75	36483565.4	29052527.01	29068416.32	36855298.35	15263463.84	105463963.4	19003482.69	32512019.54	29324572.89	20585898.88
B6DYP8	Gsta1	Glutathione S-transferase OS=Rattus norvegicus OX=10116 GN=Gsta1 PE=2 SV=1	36	9	107	4	1	221	25.3	8.75	200.26	9	5	235281983.7	188171401.1	251192652.7	325996381.9	163759885.8	220526254.3	175733751.9	562578989.1	126065994.9	71513384.05	99377529.31	166027301.7
B6DYQ9	Gstt2	Glutathione S-transferase theta 2 OS=Rattus norvegicus OX=10116 GN=Gstt2 PE=2 SV=1	24	4	45	4	1	244	27.4	7.91	116.16	4	0	6378209.005	8704438.719	5675557.574	4878377.679	12913846.58	6758863.549	4171870.794	27493923.53	7748760.696	4610224.618	5854114.789	8467325.354
B7X6I3	Cend1	C38 protein OS=Rattus norvegicus OX=10116 GN=Cend1 PE=1 SV=1	19	2	16	2	1	149	15	8.97	43.54	2	0	253540.6332	NA	2395275.73	1744546.714	978984.0442	1193463.394	NA	NA	807745.1108	2543959.611	624608.2775	1038867.258
B8PS70	Clec2g	C-type lectin-related protein 11 (Fragment) OS=Rattus norvegicus OX=10116 GN=Clr11 PE=2 SV=1	37	7	58	7	1	210	23.9	8.43	133.81	7	0	23840271.76	30319251.28	13624579.23	12744385.38	33080799.84	18631966	8615055.821	3840871.08	13335226.31	13416929.66	15709549.28	21065340.89
C0IXW5	Fry	Furry-like protein OS=Rattus norvegicus OX=10116 GN=Fry PE=2 SV=1	2	5	18	5	1	3011	338.2	6.07	37.48	5	0	1222616.474	411555.3438	1483913.973	1866765.367	979229.2237	1497260.249	604197.0573	NA	1078939.595	1369525.619	549345.2162	907277.5273
C0JPT7	Flna	Filamin A OS=Rattus norvegicus OX=10116 GN=Flna PE=1 SV=1	61	122	2725	113	1	2639	280.3	6.04	7270.1	122	9	968350779.8	1290638696	1207490984	1244623529	1062068703	1327486522	1805586264	129458620.7	1603019422	2348263381	1949913921	1305795455
C0KUC6	Lims1	LIM and senescent cell antigen-like-containing domain protein OS=Rattus norvegicus OX=10116 GN=Lims1 PE=1 SV=1	41	13	110	9	1	387	44.4	7.84	254.74	13	4	26782887.81	25695820.81	15252375.07	13618560.1	23495486.17	19202621.5	31160253.4	7829283.646	40433078.28	13530995.53	25737460.03	41433090.25
C5NTX8	#N/A	Tensin3 OS=Rattus norvegicus OX=10116 GN=TSN3 PE=2 SV=1	10	10	61	1	1	1444	155.7	6.67	135.2	10	0	319691.0569	NA	243383.1427	310898.1833	310262.9314	NA	669900.6869	NA	469924.7975	310728.6146	130944.3614	502478.7083
C6JUQ2	Gab1	GRB2-associated binding protein 1 long isoform OS=Rattus norvegicus OX=10116 GN=Gab1 PE=2 SV=1	2	1	1	1	1	721	79.7	5.54	2.54	1	0	NA	NA	NA	NA	NA	NA	NA	NA	NA	NA	NA	NA
C6ZII9	Sirt3	NAD-dependent protein deacetylase OS=Rattus norvegicus OX=10116 GN=Sirt3 PE=1 SV=1	11	3	3	3	1	320	35	7.42	7.94	3	0	1626034.629	1624033.154	1595164.162	643315.1089	14046.7328	NA	3377148.897	622879.8067	2501359.254	5070846.545	3737385.284	2649307.473
C7C5T2	Pfkp	ATP-dependent 6-phosphofructokinase OS=Rattus norvegicus OX=10116 GN=Pfkp PE=2 SV=1	28	17	145	14	1	788	85.7	7.28	367.75	17	0	12527589.92	11457756.94	6326344.938	9044090.412	12688022.55	9766567.478	17062525.06	1227265.959	39304502.74	14965492.55	15198207.43	26659229.26
C7E1V1	Itpr3	Inositol 1,4,5-trisphosphate receptor type 3 OS=Rattus norvegicus OX=10116 GN=Itpr3 PE=1 SV=1	7	14	61	9	1	2670	304	6.54	112.08	14	0	4201339.884	3338388.125	3488439.113	2617315.501	4274097.146	4806017.978	1637680.213	NA	1780042.702	3613492.412	4636007.943	3981079.11
C7ECU5	Ace2	Angiotensin-converting enzyme OS=Rattus norvegicus OX=10116 GN=Ace2 PE=2 SV=1	5	3	11	3	1	805	92.4	5.41	28.33	3	0	1616211.291	1973144.813	1103620.976	815568.364	1923052.239	1877185.095	283021.0693	76649.53633	850222.5097	245703.5544	365481.9704	NA
C9WPN6	Eif2s3y	Eukaryotic translation initiation factor 2 subunit 3, Y-linked OS=Rattus norvegicus OX=10116 GN=Eif2s3y PE=2 SV=2	41	16	206	2	1	472	51.1	8.4	492.21	16	0	3945316.803	2026974	2584330.503	3276572.826	3117078.738	1539822.05	5701375.433	7164685.351	5899637.301	2793910.509	4984013.202	8371719.929
D1M8S3	Il1rap	Interleukin 1 receptor accessory protein b OS=Rattus norvegicus OX=10116 GN=Il1rap PE=1 SV=1	8	5	15	5	1	685	78.4	6.71	31.73	5	0	3312960.227	4767979.625	4269397.827	3965846.223	4040490.392	5528535.212	3668918.063	1393720.215	5009058.171	4374021.936	4545162.876	4950575.406
D2E6L7	ND1	NADH-ubiquinone oxidoreductase chain 1 OS=Rattus norvegicus OX=10116 GN=ND1 PE=3 SV=1	12	3	20	3	1	318	36	6.92	22.16	3	0	1792763.999	2365861.047	3371564.136	2107087.451	2357844.563	1934068.214	517874.3381	2287038.44	1068393.598	3679344.46	3270529.261	1879785.531
D2XV59	Gtpbp1	GTP-binding protein 1 OS=Rattus norvegicus OX=10116 GN=Gtpbp1 PE=1 SV=1	6	3	17	3	1	669	72.4	8.34	36.48	3	0	2452535.919	1221135.516	1266852.112	1389997.931	1292443.512	1063263.9	2966096.595	1539799.032	2302154.317	827215.6462	1941722.699	5996380.871
D3KR63	Rapgef4	cAMPS OS=Rattus norvegicus OX=10116 GN=Rapgef4 PE=2 SV=1	4	3	8	3	1	1011	115.5	6.87	14.89	3	0	1326101.602	1046139.031	513089.5419	706992.8767	1051271.446	591902.7899	1905694.313	624877.1709	1705431.428	320626.2335	493165.3311	699673.9482
D3Z7Z5	Ranbp10	RAN-binding protein 10 OS=Rattus norvegicus OX=10116 GN=Ranbp10 PE=1 SV=2	3	2	3	2	1	718	77.8	6.79	8.34	2	0	540353.2336	301720.75	770926.0252	196328.8036	NA	907330.1544	1224872.295	463078.3146	1577034.261	299944.4649	577277.1792	999230.8396
D3Z837	Cdc42bpg	CDC42 binding protein kinase gamma (DMPK-like) (Predicted) OS=Rattus norvegicus OX=10116 GN=Cdc42bpg PE=3 SV=2	16	17	91	17	1	1551	172.2	5.87	222.92	17	0	10228157.99	10690405.03	9084322.786	8558253.897	12777220.43	6723851.917	18622213.99	772421.3118	8906735.487	12165678.74	12306798.8	19203065.23
D3Z841	Btnl10	Butyrophilin-like 10 OS=Rattus norvegicus OX=10116 GN=Btnl10 PE=1 SV=3	6	2	3	2	1	453	50.1	6	9.04	2	0	162473.0518	177631.3125	NA	NA	1280116.902	974456.4886	NA	NA	NA	NA	109916.6532	NA
D3Z863	Cwf19l1	CWF19-like 1, cell cycle control (S. pombe) (Predicted) OS=Rattus norvegicus OX=10116 GN=Cwf19l1 PE=1 SV=1	3	1	1	1	1	537	60.3	7.27	2.82	1	0	NA	NA	NA	NA	NA	NA	742249.5503	NA	NA	911840.5786	371875.9348	527339.1882
D3Z865	Mpdu1	Mannose-P-dolichol utilization defect 1 OS=Rattus norvegicus OX=10116 GN=Mpdu1 PE=1 SV=1	4	1	20	1	1	247	26.5	8.56	39.43	1	0	10010107.26	9767202	13382882.12	8355391.699	7301302.578	11077793.97	2637746.944	8144649.027	4396519.952	6968497.563	8421993.024	9175050.568
D3Z890	Daglb	Sn1-specific diacylglycerol lipase beta OS=Rattus norvegicus OX=10116 GN=Daglb PE=1 SV=3	3	1	11	1	1	669	73.6	6.55	31.91	1	0	89873.09409	193051.0527	28944.24124	61888.70761	542685.145	79014.28751	104877.2003	NA	966320.0974	583561.6329	683335.0877	710395.5749
D3Z898	Samhd1	SAM and HD domain-containing deoxynucleoside triphosphate triphosphohydrolase 1 OS=Rattus norvegicus OX=10116 GN=Samhd1 PE=1 SV=3	16	8	32	8	1	620	71.6	8.06	64.87	8	0	2508704.843	3251191.438	1501933.006	2145925.94	3346023.293	2266533.419	5142111.032	1751397.738	8810599.7	2181333.81	5679062.088	4308844.421
D3Z8B6	Abhd15	Abhydrolase domain-containing 15 OS=Rattus norvegicus OX=10116 GN=Abhd15 PE=1 SV=1	5	2	2	2	1	459	51.3	7.75	2.46	2	0	NA	NA	NA	NA	NA	232622.818	160126.9848	221342.3853	191683.4343	NA	NA	NA
D3Z8D8	Slitrk1	SLIT and NTRK-like family, member 1 OS=Rattus norvegicus OX=10116 GN=Slitrk1 PE=4 SV=1	2	1	1	1	1	696	77.8	6.49	2.61	1	0	NA	NA	NA	NA	338409.8742	NA	NA	109821.2224	933375.7843	707942.5872	411928.4818	516323.3837
D3Z8E0	Rps6ka3	Ribosomal protein S6 kinase OS=Rattus norvegicus OX=10116 GN=Rps6ka3 PE=1 SV=2	25	15	93	11	1	740	83.7	6.89	198.58	15	4	14373099.94	11237751.19	12209455.31	15980265.29	17530608.66	12828230.71	17618736.33	2281314.314	31008532.61	12950318.71	15559782.26	21310406.7
D3Z8E2	Sema3e	Sema domain, immunoglobulin domain (Ig), short basic domain, secreted, (Semaphorin) 3E (Predicted) OS=Rattus norvegicus OX=10116 GN=Sema3e PE=3 SV=1	2	1	1	1	1	775	89.4	7.9	2.74	1	0	NA	NA	NA	NA	NA	NA	NA	NA	NA	NA	NA	NA
D3Z8F1	Vill	Villin-like OS=Rattus norvegicus OX=10116 GN=Vill PE=1 SV=2	2	1	1	1	1	857	96.3	6.93	2.29	1	0	NA	NA	NA	NA	NA	NA	NA	949778.9072	NA	NA	NA	NA
D3Z8I7	Gstt3	Glutathione S-transferase, theta 3 OS=Rattus norvegicus OX=10116 GN=Gstt3 PE=1 SV=1	22	6	97	6	1	210	23.4	9.09	262.91	6	0	13805381.82	14295952.66	8520513.476	12237457.95	14895694.72	8072758.402	10605670.55	99682896.5	16117540.11	6245230.294	8310892.18	30439229.48
D3Z8L7	Rras	Ras-related protein R-Ras OS=Rattus norvegicus OX=10116 GN=Rras PE=1 SV=1	57	10	163	8	1	218	23.9	7.34	438.21	10	0	37147190.2	45182621.72	27669290.6	25040179.09	48487232.96	38109191.42	27089182	2585997.63	42732798.67	25881339.1	39116046.13	51470226.72
D3Z8M8	Tsc22d1	TSC22 domain family protein 1 OS=Rattus norvegicus OX=10116 GN=Tsc22d1 PE=1 SV=1	1	1	2	1	1	1050	106.7	5.87	5.54	1	0	326574.2034	656100.75	1246982.831	1048831.837	894443.6282	555641.295	1333637.881	NA	1267277.431	613321.4277	493278.8799	620811.1743
D3Z8N9	Asxl2	ASXL transcriptional regulator 2 OS=Rattus norvegicus OX=10116 GN=Asxl2 PE=4 SV=3	1	1	1	1	1	1225	130.1	8.15	0	1	0	2125181.065	3306139	2441794.859	3723991.642	3458376.679	2646610.129	351133.6285	3139589.28	592022.8997	2570518.516	3946967.862	3281475.194
D3Z8P1	Rnf7	Ring finger protein 7 OS=Rattus norvegicus OX=10116 GN=Rnf7 PE=1 SV=1	11	1	5	1	1	113	12.7	5.44	14.32	1	0	512033.3414	778435.6875	556426.9781	474531.2949	712398.8632	782730.2765	1405332.137	571001.592	1252797.577	512348.2476	790376.1692	1052049.372
D3Z8P5	RGD1566085	Uncharacterized protein OS=Rattus norvegicus OX=10116 PE=1 SV=2	14	3	6	3	1	319	35.2	8.03	13.7	3	0	1403604.443	1568442.625	1883545.965	1069460.749	688696.4975	330600.475	1654250.317	NA	1005513.684	851734.3509	823591.1976	932516.4785
D3Z8R4	Rbm25l1	RNA-binding motif protein 25-like 1 OS=Rattus norvegicus OX=10116 GN=Rbm25l1 PE=1 SV=3	2	1	1	1	1	817	96.5	6.39	2.39	1	0	585071.9946	NA	NA	NA	NA	NA	NA	NA	NA	NA	NA	NA
D3Z8W0	Paox	Polyamine oxidase OS=Rattus norvegicus OX=10116 GN=Paox PE=1 SV=1	3	1	1	1	1	531	58.8	5.15	2.77	1	0	NA	NA	NA	NA	NA	NA	NA	NA	NA	NA	NA	NA
D3Z8X6	Dtx3l	Deltex E3 ubiquitin ligase 3L OS=Rattus norvegicus OX=10116 GN=Dtx3l PE=1 SV=1	17	9	37	9	1	750	83.1	8.03	88.56	9	0	6615481.988	6232085.297	5607498.184	4071369.18	6373654.552	5952023.155	6842575.772	4959527.299	4404391.518	2520529.191	6673095.31	5569573.979
D3Z900	2-Mar	Mitochondrial amidoxime reducing component 2 OS=Rattus norvegicus OX=10116 GN=Marc2 PE=1 SV=2	21	8	92	8	1	338	38.2	8.68	155.9	8	0	28382006.96	29045941.66	54202856.95	36930947.95	32433095.5	35581557.02	22006362.49	106746021.1	16910237.66	35047570.99	41689507.24	31660167.55
D3Z941	Mars	Methionyl-tRNA synthetase OS=Rattus norvegicus OX=10116 GN=Mars PE=1 SV=1	29	19	78	19	1	902	101.5	6.46	175.87	19	0	8970560.788	9300315.625	11725297.13	8783400.691	18384593.46	7748976.378	13069577.92	25588995.69	34151003.21	9341129.72	14818267.35	16856665.28
D3Z952	Mfap2	Microfibril-associated protein 2 OS=Rattus norvegicus OX=10116 GN=Mfap2 PE=4 SV=1	16	2	3	2	1	185	20.8	4.89	6.64	2	0	2820073.345	3766092	3128374.991	5293990.432	3185167.173	4851290.181	986082.2095	428462.4304	352809.8353	14425523.95	4214200.501	NA
D3Z979	Man1c1	alpha-1,2-Mannosidase OS=Rattus norvegicus OX=10116 GN=Man1c1 PE=1 SV=2	4	2	10	2	1	625	70.6	7.03	24.24	2	0	36297237.3	30922973.5	32002844.22	30501091.14	36430003.62	36384410.89	16695432.01	NA	24672013.88	11669744.95	13848007.01	10289657.35
D3Z981	Plxna1	Plexin A1 OS=Rattus norvegicus OX=10116 GN=Plxna1 PE=1 SV=3	4	6	19	5	1	1912	213.1	6.95	42.67	6	1	2185144.498	1599020.453	2986132.824	2393549.587	2385927.315	2986037.378	4307873.769	3150710.135	3214763.449	3119455.836	1926728.779	1763639.028
D3Z9C0	Mios	Meiosis regulator for oocyte development OS=Rattus norvegicus OX=10116 GN=Mios PE=1 SV=1	9	7	32	7	1	875	98.3	6.71	70.73	7	0	2517702.884	2589604.859	3192878.982	1780490.441	2640057.799	2003286.201	1654477.161	3693482.126	1747774.739	2376286.113	3622472.041	2712425.647
D3Z9D2	Fyco1	FYVE and coiled-coil domain containing 1 (Predicted) OS=Rattus norvegicus OX=10116 GN=Fyco1 PE=1 SV=1	23	26	114	26	1	1451	163.5	5.07	303.97	26	0	21362691.82	16891688.28	23650651.01	19788791.12	25450976.52	18957445.58	15978456.89	11324369.63	13450576.66	11096585.67	15436005.58	22445264.09
D3Z9E1	Emilin1	Elastin microfibril interfacer 1 OS=Rattus norvegicus OX=10116 GN=Emilin1 PE=1 SV=1	22	13	58	13	1	900	94.4	4.98	140.89	13	0	2819691.793	6593752.641	4623910.059	6256772.523	3130009.414	7351139.62	4743756.173	1041973.579	2896503.037	17117830.19	9246544.05	4492549.471
D3Z9E5	Slc5a8	Solute carrier family 5 member 8 OS=Rattus norvegicus OX=10116 GN=Slc5a8 PE=3 SV=1	2	1	2	1	1	611	66.4	7.64	5.42	1	0	200883.5397	517021.3438	NA	135190.9158	415614.2368	302090.3027	521744.713	NA	720777.2103	NA	502151.7645	553312.6941
D3Z9G3	#N/A	Uncharacterized protein OS=Rattus norvegicus OX=10116 PE=4 SV=1	15	2	7	2	1	160	18.6	10.55	16.82	2	0	5006439.857	1826334.75	733406.4326	1674735.759	1588098.182	968433.4423	4606188.293	13593870.61	2782278.909	NA	2777134.181	3069702.364
D3Z9H2	Hapln4	Hyaluronan and proteoglycan link protein 4 OS=Rattus norvegicus OX=10116 GN=Hapln4 PE=4 SV=1	7	1	1	1	1	400	42.7	8.85	0	1	0	179028.6839	NA	1376844.888	731597.091	707617.1895	389520.1366	NA	NA	NA	NA	NA	NA
D3Z9I1	Coa3	Cytochrome C oxidase assembly factor 3 OS=Rattus norvegicus OX=10116 GN=Coa3 PE=1 SV=1	18	2	13	2	1	108	11.9	9.6	27.37	2	0	950708.297	1316741.125	3604132.797	1187347.65	1153987.274	1371588.019	1109314.359	1056699.057	1243847.249	NA	601882.6986	1500673.162
D3Z9I3	Fgd2	FYVE, RhoGEF and PH domain-containing 2 OS=Rattus norvegicus OX=10116 GN=Fgd2 PE=1 SV=1	2	1	2	1	1	655	74.5	6.44	5.69	1	0	NA	NA	NA	NA	NA	NA	NA	NA	NA	NA	NA	NA
D3Z9K4	Plekho2	Pleckstrin homology domain-containing O2 OS=Rattus norvegicus OX=10116 GN=Plekho2 PE=1 SV=2	20	8	70	8	1	494	54	5.2	189.87	8	0	12724592.21	10170743.47	11180408.9	17721959.31	12030213.18	11063725.06	32679767.05	2533051.24	19899855.12	5477128.613	14145851.73	24999656.51
D3Z9L0	Agk	Acylglycerol kinase OS=Rattus norvegicus OX=10116 GN=Agk PE=1 SV=2	17	6	72	6	1	490	54.2	8.6	190.41	6	0	7686978.916	10776336.31	30168211.69	20392271.1	14754914.26	17631195.99	8341036.263	3036271.258	4039555.148	17508322.94	10520240.87	5436216.938
D3Z9L2	Higd1b	HIG1 domain family, member 1B (Predicted), isoform CRA_a OS=Rattus norvegicus OX=10116 GN=Higd1b PE=4 SV=1	15	1	7	1	1	98	10.9	9.55	15.3	1	0	670359.8961	1262106.375	2453565.004	1238749.008	1023404.944	1030114.053	743394.6099	NA	NA	NA	661551.3614	1147479.875
D3Z9L5	Wdr11	WD repeat domain 11 OS=Rattus norvegicus OX=10116 GN=Wdr11 PE=1 SV=2	15	15	64	15	1	1224	135.7	7.12	158.04	15	0	8018213.883	5870418.156	7595198.081	6581442.352	12484662.82	8020035.195	9006317.96	8311739.237	12168204.36	9399719.698	13083111.02	13364168.38
D3Z9M5	Fkbp7	Peptidylprolyl isomerase OS=Rattus norvegicus OX=10116 GN=Fkbp7 PE=4 SV=1	11	2	12	2	1	218	24.8	6.24	12.26	2	0	947830.3383	1381255.5	1591664.443	1566633.476	1143937.306	1109875.318	1794597.411	NA	988885.7553	1429826.287	1424109.771	2385887.378
D3Z9P1	Kdsr	3-ketodihydrosphingosine reductase OS=Rattus norvegicus OX=10116 GN=Kdsr PE=1 SV=1	19	6	90	6	1	332	36	8.29	227.53	6	0	25437111.76	31582110.25	22785538.87	28630881.23	36354655.9	31728449.16	17461570.41	4635845.043	22921490.39	19742038.88	22353072.99	22696567.64
D3Z9R8	LOC691427	6.8 kDa mitochondrial proteolipid OS=Rattus norvegicus OX=10116 GN=Mp68 PE=1 SV=1	18	1	2	1	1	60	6.9	9.92	0	1	0	20359.93049	12543.05762	37235.73037	13505.0471	6611.981394	27385.85767	9952.533174	7866.87424	12596.39677	13906.10907	NA	NA
D3Z9T4	Siglec5	Sialic acid-binding Ig-like lectin 5 OS=Rattus norvegicus OX=10116 GN=Siglec5 PE=1 SV=2	2	1	1	1	1	569	62.1	7.55	1.98	1	0	NA	NA	NA	NA	NA	NA	NA	NA	NA	NA	NA	NA
D3Z9U2	Cd163	CD163 antigen (Predicted) OS=Rattus norvegicus OX=10116 GN=Cd163 PE=1 SV=1	30	25	219	25	1	1120	120.6	6.16	576.5	25	0	25644901.81	25764008.98	35178775.6	23313939.51	37591639.5	32156086.42	35273885.48	19778667.82	138774075.3	79843963.21	113327533.1	62675390.68
D3Z9Y3	Cerk	Ceramide kinase OS=Rattus norvegicus OX=10116 GN=Cerk PE=4 SV=1	2	1	4	1	1	531	59.6	7.24	9.56	1	0	NA	NA	NA	NA	NA	185978.8827	104892.4263	NA	NA	NA	62617.43297	156313.436
D3Z9Z0	Ank1	Ankyrin 1 OS=Rattus norvegicus OX=10116 GN=Ank1 PE=1 SV=1	36	47	575	44	1	1707	187	6.7	1358.25	47	3	180525189.9	198082299.6	87045663.38	65993922.91	360863262	298271176.2	126100328.4	21829931.91	57276930.05	34115231.92	62381851.6	66680265.78
D3Z9Z2	Lipt2	Putative lipoyltransferase 2, mitochondrial OS=Rattus norvegicus OX=10116 GN=Lipt2 PE=3 SV=1	8	1	5	1	1	231	25.2	8.76	12.19	1	0	NA	NA	NA	NA	NA	NA	NA	NA	NA	NA	NA	NA
D3ZA22	Trim47	Similar to Tripartite motif protein 47 OS=Rattus norvegicus OX=10116 GN=Trim47 PE=1 SV=1	2	1	4	1	1	642	70	6.27	10.16	1	0	NA	NA	NA	NA	NA	NA	NA	NA	730843.6095	438073.6098	NA	545248.5049
D3ZA31	Mtmr2	Myotubularin related protein 2 (Predicted), isoform CRA_b OS=Rattus norvegicus OX=10116 GN=Mtmr2 PE=1 SV=1	5	3	7	3	1	643	73.2	7.25	13.62	3	0	2551981.502	2189411.313	1582641.557	1537428.552	2163278.333	1613049.945	1075489.467	NA	1706590.983	1055512.242	3093582.934	2745218.843
D3ZA66	Pstpip2	Proline-serine-threonine phosphatase-interacting protein 2 OS=Rattus norvegicus OX=10116 GN=Pstpip2 PE=1 SV=3	7	2	3	2	1	334	39	8.37	7.39	2	0	NA	131098.8438	273620.5274	NA	NA	802207.8067	NA	926011.8765	565808.5383	NA	66556.3788	NA
D3ZA84	Tln2	Talin 2 OS=Rattus norvegicus OX=10116 GN=Tln2 PE=1 SV=3	9	18	183	9	1	2542	271.5	5.55	470.75	18	0	17106532.27	18183502.79	19290873.29	10429119.03	9849354.7	18485754.82	18967452.2	857246.5141	661918.4308	1182386.527	689884.2075	1101240.914
D3ZA85	Nfu1	Histone cell cycle regulation defective interacting protein 5 (Predicted), isoform CRA_a OS=Rattus norvegicus OX=10116 GN=Nfu1 PE=1 SV=1	17	3	19	3	1	253	28.3	4.96	42.74	3	0	1546816.876	1613069.875	979828.1334	2619550.893	3193684.499	2155123.176	2542264.884	882955.7005	424654.4532	4234710.341	2659163.24	1983336.899
D3ZA93	Acot13	Acyl-CoA thioesterase 13 OS=Rattus norvegicus OX=10116 GN=Acot13 PE=1 SV=1	7	1	4	1	1	140	15.3	8.84	8.61	1	0	1486465.159	2215347.25	2912800.909	4668126.736	2214085.351	3222181.432	695229.9019	2699912.456	889986.5892	1378858.65	1009804.688	703473.7803
D3ZAA3	Ltbp1	Latent-transforming growth factor beta-binding protein 1 OS=Rattus norvegicus OX=10116 GN=Ltbp1 PE=1 SV=2	1	2	2	2	1	1712	186.5	5.97	4.68	2	0	342130.544	1115207.5	206799.883	1083459.475	1073497.17	2311048.168	NA	NA	NA	928582.316	382419.932	NA
D3ZAA9	Mpp2	MAGUK p55 subfamily member 2 OS=Rattus norvegicus OX=10116 GN=Mpp2 PE=1 SV=2	17	8	27	7	1	552	61.5	6.44	65.98	8	0	12147943.37	10251955.44	6830821.871	7352490.672	11218512.08	11056456.69	7355996.964	2428871.805	5536508.599	1494613.119	4317858.659	12174297.41
D3ZAC0	Itga2b	Integrin subunit alpha 2b OS=Rattus norvegicus OX=10116 GN=Itga2b PE=1 SV=2	20	18	106	18	1	1034	112.6	5.92	265.25	18	0	16808773.79	29931840.59	30316407.21	19758104.57	31769511.43	119391368.3	11474714.79	24536232.73	11747278.71	11650964.29	13655122.13	27980808.11
D3ZAE9	Abca8	ATP-binding cassette subfamily A member 8 OS=Rattus norvegicus OX=10116 GN=Abca8 PE=1 SV=3	3	4	23	2	1	1621	182.4	7.84	41.78	4	0	304474.2711	447867.7813	480836.3843	509520.8464	509072.2991	493015.4958	752235.8302	1063632.736	64915.92823	133810.3243	423992.4549	1120306.083
D3ZAF5	Postn	Periostin OS=Rattus norvegicus OX=10116 GN=Postn PE=1 SV=1	20	11	86	11	1	810	90	7.53	211.35	11	0	8453168.555	9889298.398	8237874.351	9622495.622	11213685.38	11806757	18500341.09	1567943.81	14687475.91	22272088.14	19900756.8	14543432.8
D3ZAF6	Atp5j2	ATP synthase subunit f, mitochondrial OS=Rattus norvegicus OX=10116 GN=Atp5mf PE=1 SV=1	24	2	50	2	1	88	10.4	10.04	75.73	2	0	37396441.53	45102060.38	85717759.84	71425566.1	40943805.55	39435321.6	14937524.8	59303299.68	15923785.43	24783808.77	49795561.41	35172435.09
D3ZAF7	Tbc1d2b	TBC1 domain family, member 2B OS=Rattus norvegicus OX=10116 GN=Tbc1d2b PE=1 SV=2	8	6	32	6	1	837	96.5	6.09	77.8	6	0	6721393.571	4654491.625	4997542.332	5842345.822	8597427.782	6149606.733	4580845.288	6371071.108	6228047.467	7730972.154	5438462.508	7985861.702
D3ZAN3	Ganab	Alpha glucosidase 2 alpha neutral subunit (Predicted) OS=Rattus norvegicus OX=10116 GN=Ganab PE=1 SV=1	35	25	486	25	1	797	90.5	6.2	1187.34	25	0	171035648	197908852.5	171266073.6	142687342.3	215871661.5	153149600.1	140590438.1	225588427.1	105261266	135217805.2	206087703.8	186844144.6
D3ZAP9	Gpd1l	Glycerol-3-phosphate dehydrogenase [NAD(+)] OS=Rattus norvegicus OX=10116 GN=Gpd1l PE=1 SV=1	46	15	76	14	1	351	38	7.01	166.88	15	1	48977152.44	46484341.2	112242893.5	89118275.76	44696691.96	54137219.69	21549179.29	14715092.12	23131588.88	19054480.42	24483766.78	20839234.17
D3ZAQ0	Fundc2	FUN14 domain-containing 2 OS=Rattus norvegicus OX=10116 GN=Fundc2 PE=1 SV=1	19	3	19	3	1	151	16.3	10.05	42.67	3	0	5713671.741	6175261.5	13422355.92	5892339.713	4104478.906	6181400.565	2762615.567	397137.8397	3367841.685	2872450.543	3700295.681	3037372.911
D3ZAR1	Ldlrap1	Low density lipoprotein receptor adapter protein 1 OS=Rattus norvegicus OX=10116 GN=Ldlrap1 PE=1 SV=2	4	1	5	1	1	306	33.8	7.36	9.03	1	0	591860.6421	493149.0313	720388.0235	372651.1885	480777.154	527673.2304	566746.2908	912287.0484	620129.9831	356878.3487	317823.1257	625279.7331
D3ZAS0	Ly86	Lymphocyte antigen 86 OS=Rattus norvegicus OX=10116 GN=Ly86 PE=4 SV=1	5	1	2	1	1	187	20.6	5.27	4.02	1	0	NA	NA	NA	NA	NA	NA	580513.5145	NA	759764.7156	583374.9268	1728472.286	1234787.935
D3ZAS8	Sart3	Spliceosome-associated factor 3, U4/U6 recycling protein OS=Rattus norvegicus OX=10116 GN=Sart3 PE=1 SV=1	3	2	3	2	1	960	109.4	5.43	7.28	2	0	27191.10658	119460.1563	30131.60496	57588.60136	397952.7419	37092.36061	126465.1617	464338.8572	740212.0989	523132.048	183241.0355	485777.7647
D3ZAS9	Ddrgk1	DDRGK domain-containing 1 OS=Rattus norvegicus OX=10116 GN=Ddrgk1 PE=1 SV=1	9	2	29	2	1	339	38.6	5.64	83.16	2	0	1920377.282	1993404.563	3895007.571	2279509.643	3418555.016	3060605.735	2191276.321	4443337.93	1474888.828	1604085.474	3874841.178	5847346.451
D3ZAU0	Muc5b	Mucin 5B, oligomeric mucus/gel-forming OS=Rattus norvegicus OX=10116 GN=Muc5b PE=4 SV=2	3	6	7	6	1	4156	448.8	5.59	12.07	6	0	NA	62949.68359	NA	46518.67173	51458.81052	NA	209983.0669	304906.6903	1629863.909	1774011.663	78966.89611	NA
D3ZAW4	Abhd4	Abhydrolase domain containing 4 (Predicted) OS=Rattus norvegicus OX=10116 GN=Abhd4 PE=1 SV=1	2	1	4	1	1	355	40.3	7.94	6.63	1	0	NA	NA	NA	409888.4243	495567.0682	701080.6125	773655.9189	545647.9316	1185222.772	683642.5208	599427.0579	632391.1355
D3ZAY8	Pnn	Pinin, desmosome-associated protein OS=Rattus norvegicus OX=10116 GN=Pnn PE=1 SV=1	4	3	5	3	1	729	82.6	7.4	10.55	3	0	7039354.293	201008.6641	862764.7687	2050713.548	486749.3964	982457.1477	622992.4488	1152132.28	1425421.53	1653448.423	260050.4671	695772.1915
D3ZAZ0	Eif3m	Eukaryotic translation initiation factor 3 subunit M OS=Rattus norvegicus OX=10116 GN=Eif3m PE=1 SV=1	35	11	91	11	1	374	42.5	5.74	232.59	11	0	7051231.981	2527114.836	3173941.067	3139464.22	3521229.465	2180649.741	9173497.683	8937528.391	15628038.73	5525194.633	7244279.848	13153530.62
D3ZB48	Hook1	Hook homolog 1 (Drosophila) (Predicted) OS=Rattus norvegicus OX=10116 GN=Hook1 PE=1 SV=1	2	1	1	1	1	728	84.3	5.22	2.89	1	0	NA	NA	NA	NA	NA	NA	NA	224287.1012	NA	NA	NA	NA
D3ZB55	Coa5	Cytochrome C oxidase assembly factor 5 OS=Rattus norvegicus OX=10116 GN=Coa5 PE=1 SV=1	45	2	3	2	1	74	8.4	8.7	6.55	2	0	36228.89933	65570.04688	31361.8385	62184.05485	145195.1625	NA	NA	NA	NA	NA	NA	NA
D3ZB81	Slc25a31	Solute carrier family 25 member 31 OS=Rattus norvegicus OX=10116 GN=Slc25a31 PE=3 SV=3	12	4	66	1	1	320	35.2	9.6	123.55	4	0	469677.2763	410856.75	763454.0631	673456.1597	NA	490503.3356	NA	248631.7995	370509.6774	310765.9417	473346.0517	294577.9543
D3ZBB3	Tmem47	Similar to transmembrane 4 superfamily member 10 (Predicted) OS=Rattus norvegicus OX=10116 GN=Tmem47 PE=1 SV=1	4	1	4	1	1	181	20	6.73	2.11	1	0	962878.2961	1019537	1240725.255	1690109.255	1716582.746	1259146.346	NA	234888.1711	372177.9396	265997.1059	NA	822055.999
D3ZBC7	Dhrs13	Dehydrogenase/reductase 13 OS=Rattus norvegicus OX=10116 GN=Dhrs13 PE=1 SV=3	16	5	23	5	1	370	40.3	8.25	32.32	5	0	5458709.705	5162373.594	5917771.905	3742175.619	6175180.56	5662007.77	3110922.552	3387771.333	2063347.648	2185723.235	5557201.492	5126787.16
D3ZBC9	Maats1	MYCBP-associated, testis expressed 1 OS=Rattus norvegicus OX=10116 GN=Maats1 PE=1 SV=2	1	1	1	1	1	771	90	8.13	1.92	1	0	7565.739972	18733.26758	15084.56153	9928.480286	NA	NA	75241.15211	NA	59104.96732	74853.74244	51183.29476	39840.98966
D3ZBE5	Nek7	Serine/threonine-protein kinase Nek7 OS=Rattus norvegicus OX=10116 GN=Nek7 PE=2 SV=1	10	3	6	3	1	302	34.5	8.25	10.65	3	0	699382.8239	584895.5781	273963.7328	232614.5341	360053.6331	1053567.811	1371921.992	2031501.068	2062599.314	1043097.584	2460464.126	2221383.317
D3ZBH5	Lmtk2	Lemur tyrosine kinase 2 OS=Rattus norvegicus OX=10116 GN=Lmtk2 PE=1 SV=1	2	2	2	2	1	1531	165.2	4.45	5.12	2	0	936999.655	679365.6875	225829.74	849176.8325	1064402.358	1075728.399	307685.3571	NA	504285.9992	500213.1767	757921.9311	263144.2196
D3ZBL5	Inpp4a	Type I inositol 3,4-bisphosphate 4-phosphatase OS=Rattus norvegicus OX=10116 GN=Inpp4a PE=1 SV=3	3	2	13	2	1	939	105.5	6.98	29.12	2	0	219462.027	210909.9844	397878.0957	287035.9465	415370.7623	212688.6631	683513.2837	221950.3371	679784.561	499185.4904	721283.1506	1007292.897
D3ZBM3	Fech	Ferrochelatase OS=Rattus norvegicus OX=10116 GN=Fech PE=1 SV=1	15	4	13	4	1	422	47.5	8.72	31.8	4	0	1278281.097	2038273.727	3135682.277	3870601.967	1140276.268	1880037.987	1925156.604	3150717.289	650394.4651	2040779.425	2252792.068	803352.5257
D3ZBN0	Hist1h1b	Histone H1.5 OS=Rattus norvegicus OX=10116 GN=Hist1h1b PE=1 SV=1	9	2	13	2	1	222	22.6	10.96	19.15	2	0	200925.5732	7584176	2209088.619	6807416.421	4667538.299	8856630.741	1908815.079	431732.0526	NA	12005522.54	2348110.019	600536.8881
D3ZBN3	Epha2	Eph receptor A2 OS=Rattus norvegicus OX=10116 GN=Epha2 PE=1 SV=3	9	7	45	6	1	977	108.7	6.35	95.7	7	0	10024648.36	16928192.92	7221625.249	5893446.811	8595355.938	16207808.06	10607464.19	3811966.862	17359498.59	10031738.62	14604604.23	16385341.48
D3ZBN4	RGD1310769	Ergosterol biosynthesis 28 homolog OS=Rattus norvegicus OX=10116 GN=Erg28 PE=1 SV=1	19	3	23	3	1	140	15.8	9.91	47.06	3	0	14871262.84	17186817	32379827.82	18625101.97	18897215.74	17368184.9	4224296.972	15134262.6	7202703.723	8206300.46	17627984.23	12776683.66
D3ZBP4	Mical1	[F-actin]-monooxygenase MICAL1 OS=Rattus norvegicus OX=10116 GN=Mical1 PE=1 SV=1	7	6	25	6	1	1047	116.6	6.05	56.8	6	0	944101.5736	872701.7656	292942.733	950146.4286	1175488.944	682670.8621	1560433.62	1036870.91	5649635.187	2364492.522	3381426.043	1565094.526
D3ZBQ5	Scarf2	Scavenger receptor class F, member 2 OS=Rattus norvegicus OX=10116 GN=Scarf2 PE=1 SV=1	6	3	10	3	1	833	87.9	8.24	16.49	3	0	1075300.618	NA	2841050.497	1335723.796	1617870.248	2107658.033	NA	NA	1091233.368	NA	162222.5359	192600.0244
D3ZBS2	Itih3	Inter-alpha-trypsin inhibitor heavy chain H3 OS=Rattus norvegicus OX=10116 GN=Itih3 PE=1 SV=3	15	11	148	11	1	887	99	6.32	322.69	11	0	23124871.43	20390975.25	16100900.66	16150905.59	25138264.11	23619311.19	87130338.27	80041309.04	89921839.12	69707588.58	110590435.1	77727633.86
D3ZBU7	RGD1310819	Similar to putative protein (5S487) OS=Rattus norvegicus OX=10116 GN=RGD1310819 PE=1 SV=3	2	1	1	1	1	1151	123.1	7.68	2.56	1	0	NA	NA	NA	NA	NA	NA	NA	NA	NA	NA	NA	NA
D3ZC15	Carmil2	Capping protein regulator and myosin 1 linker 2 OS=Rattus norvegicus OX=10116 GN=Carmil2 PE=1 SV=2	1	1	1	1	1	1368	148.3	6.93	1.81	1	0	810669.4449	464525.6875	885766.6572	1005582.539	1127012.344	734738.8934	NA	3251803.597	NA	4492558.515	NA	NA
D3ZC46	Tcf25	Transcription factor 25 OS=Rattus norvegicus OX=10116 GN=Tcf25 PE=1 SV=2	3	2	12	2	1	664	75.3	6.67	20.71	2	0	1277157.727	165237.6094	261148.5483	632307.3092	607539.8365	490242.1923	1286703.31	657939.3952	815251.4253	190777.5198	1144612.386	1523439.868
D3ZC54	#N/A	Uncharacterized protein OS=Rattus norvegicus OX=10116 PE=1 SV=2	11	1	1	1	1	117	13.1	9.04	2.47	1	0	NA	616602.4375	NA	NA	NA	NA	2140858.571	NA	NA	NA	504273.2414	853148.5562
D3ZC55	Hspa12a	Heat shock 70kDa protein 12A (Predicted), isoform CRA_a OS=Rattus norvegicus OX=10116 GN=Hspa12a PE=1 SV=1	20	11	72	9	1	675	74.8	6.61	167.96	11	0	7339671.573	8680090.75	6401663.782	6072704.477	8131221.699	6029845.039	11619629.64	206074.1079	14172043.3	9220870.239	11235102.99	8400029.316
D3ZC56	Dst	Dystonin OS=Rattus norvegicus OX=10116 GN=Dst PE=1 SV=3	1	3	21	1	1	7512	846.7	5.34	50.39	3	0	NA	NA	NA	356406.2348	NA	NA	NA	886781.4117	NA	NA	425530.0788	NA
D3ZC63	Cmpk2	Cytidine/uridine monophosphate kinase 2 OS=Rattus norvegicus OX=10116 GN=Cmpk2 PE=1 SV=3	19	6	33	6	1	447	50.1	7.24	88.41	6	0	2029014.057	5767091.563	8236910.875	8557627.367	6085925.625	5579642.26	1376671.784	2904082.761	5098331.177	4748073.686	1152874.111	3378611.023
D3ZC81	Pex10	Peroxisomal biogenesis factor 10 OS=Rattus norvegicus OX=10116 GN=Pex10 PE=1 SV=1	3	1	3	1	1	324	37.1	9.94	6.8	1	0	NA	NA	NA	NA	NA	375995.5206	NA	1173634.089	123845.7021	242636.0866	332706.8948	NA
D3ZC89	Fam114a2	Uncharacterized protein OS=Rattus norvegicus OX=10116 PE=1 SV=3	5	2	13	2	1	499	54.4	4.91	28.9	2	0	560899.7579	605562.1406	632530.0392	534950.9908	1316780.364	587907.9565	801851.4121	879786.0068	549805.6118	462598.792	217184.8733	734534.3336
D3ZC96	Ttc39b	Tetratricopeptide repeat protein 39B OS=Rattus norvegicus OX=10116 GN=Ttc39b PE=3 SV=1	4	2	11	2	1	617	70.1	6.83	6.66	2	0	345702.8621	463056.5938	432263.3382	487096.8952	470595.8776	430027.533	338338.2233	726865.127	947334.4697	790335.0087	1006786.804	765022.4223
D3ZCA0	Prosc	Pyridoxal phosphate homeostasis protein OS=Rattus norvegicus OX=10116 GN=Plpbp PE=1 SV=1	5	1	2	1	1	275	30.1	7.93	4.03	1	0	135543.0318	226412.1406	NA	200851.8935	457886.718	132437.2493	594993.9154	NA	329629.1811	276999.1782	177791.3959	456689.588
D3ZCC5	Ankrd24	Ankyrin repeat domain 24 OS=Rattus norvegicus OX=10116 GN=Ankrd24 PE=4 SV=1	1	1	3	1	1	903	96.2	4.72	5.88	1	0	NA	NA	NA	NA	NA	NA	NA	NA	NA	NA	NA	NA
D3ZCD0	Tek	Endothelial-specific receptor tyrosine kinase OS=Rattus norvegicus OX=10116 GN=Tek PE=1 SV=1	15	11	29	10	1	1120	125.7	6.81	65.79	11	0	6523234.055	8718777.219	5351366.973	4974216.068	5799301.044	5430921.708	123829.0962	302340.1674	632334.9028	1494602.696	744934.0068	329243.3709
D3ZCD4	Pitpnb	Phosphatidylinositol transfer protein beta isoform OS=Rattus norvegicus OX=10116 GN=Pitpnb PE=1 SV=3	38	9	61	7	1	272	31.6	6.25	133.32	9	2	12547384.53	13975982.91	11311406.44	11636722.05	16442319.68	12355320.85	9638071.071	9600665.583	15397447.33	6462350.822	11720921.18	13222341.76
D3ZCF8	Abca8a	ATP-binding cassette, subfamily A (ABC1), member 8a OS=Rattus norvegicus OX=10116 GN=Abca8a PE=1 SV=3	29	40	417	35	1	1624	184.8	7.25	969.68	40	5	123167516.8	146961436.7	123407805.7	90614449.12	114639561.2	137745886.4	152772230.3	115899880.8	251454772.7	82591744.37	132785469.3	189542308.3
D3ZCG3	Mon2	MON2 homolog, regulator of endosome-to-Golgi-trafficking OS=Rattus norvegicus OX=10116 GN=Mon2 PE=1 SV=3	7	10	51	10	1	1707	188.3	6.2	104.17	10	0	6156257.446	5229091.953	4659515.44	5098056.681	4801093.632	4846710.13	6062514.108	4492042.097	11034767.82	4860658.341	6020508.608	7009303.932
D3ZCH9	Cd177	CD177 molecule OS=Rattus norvegicus OX=10116 GN=Cd177 PE=4 SV=2	24	12	127	1	1	818	87	5.92	331.27	12	0	NA	595794.4375	932063.9727	916611.8564	829362.6845	589180.4008	NA	NA	728851.5376	584570.3413	NA	1667337.095
D3ZCI5	Stxbp6	Syntaxin-binding protein 6 OS=Rattus norvegicus OX=10116 GN=Stxbp6 PE=1 SV=2	10	2	10	2	1	210	23.7	9.19	25.7	2	0	4047949.95	4804029.688	3196331.219	3267483.708	7903888.172	3986936.204	447066.9788	NA	1550472.733	960835.3535	2918734.999	3495529.554
D3ZCI9	Myl10	Myosin light chain 10 OS=Rattus norvegicus OX=10116 GN=Myl10 PE=4 SV=3	7	1	2	1	1	147	16.9	4.75	4.98	1	0	NA	NA	NA	NA	NA	NA	NA	NA	NA	NA	NA	NA
D3ZCJ3	Mfsd6	Major facilitator superfamily domain-containing 6 OS=Rattus norvegicus OX=10116 GN=Mfsd6 PE=1 SV=1	2	1	3	1	1	794	87.9	5.81	8.01	1	0	748157.6252	420953.0625	832430.5677	NA	NA	NA	NA	NA	NA	NA	NA	818205.1847
D3ZCK4	Def6	DEF6 guanine nucleotide exchange factor OS=Rattus norvegicus OX=10116 GN=Def6 PE=1 SV=1	2	1	2	1	1	630	73.5	6.06	5.67	1	0	696291.8192	672756.75	685758.522	787394.2647	1750928.015	1180551.217	NA	957197.8734	1348361.507	808033.6013	638692.4246	NA
D3ZCM9	Dnaaf3	Dynein assembly factor 3, axonemal OS=Rattus norvegicus OX=10116 GN=Dnaaf3 PE=3 SV=1	3	1	1	1	1	583	64.3	6.24	2.28	1	0	NA	NA	NA	NA	NA	NA	NA	NA	NA	NA	NA	NA
D3ZCP6	Amer1	APC membrane recruitment protein 1 OS=Rattus norvegicus OX=10116 GN=Amer1 PE=4 SV=1	1	1	1	1	1	1111	121.6	4.77	2.79	1	0	NA	NA	NA	NA	NA	NA	NA	NA	NA	NA	NA	NA
D3ZCQ2	Alg11	ALG11, alpha-1,2-mannosyltransferase OS=Rattus norvegicus OX=10116 GN=Alg11 PE=1 SV=2	7	2	4	2	1	430	48.3	8.21	9.34	2	0	1670642.917	1066562.875	2297908.15	1329918.367	1046989.259	NA	917362.6449	1662813.674	606235.6548	831995.9418	1018145.812	864322.347
D3ZCQ9	Mlf1	Myeloid leukemia factor 1 OS=Rattus norvegicus OX=10116 GN=Mlf1 PE=1 SV=1	3	1	9	1	1	282	32.2	9.16	19.53	1	0	1996698.714	1266360.5	1822311.629	4395401.613	1605244.177	1302096.46	3941068.293	NA	2365465.749	718664.6179	4843148.616	2906706.757
D3ZCS3	Pcbp4	Poly(rC)-binding protein 4 OS=Rattus norvegicus OX=10116 GN=Pcbp4 PE=4 SV=1	5	2	19	1	1	403	41.4	8.16	20.9	2	0	5566510.341	4906589	4843834.924	3941601.777	3744747.946	3966939.097	9733443.813	9679581.897	9930543.228	6659711.571	6150845.239	6172873.558
D3ZCS9	RGD1309350	5-hydroxyisourate hydrolase OS=Rattus norvegicus OX=10116 GN=RGD1309350 PE=1 SV=1	9	1	1	1	1	141	16	8.92	2.93	1	0	224726.6685	NA	1043493.745	1096330.373	NA	268287.4048	NA	1099204.006	199858.6877	299102.5244	NA	192358.0762
D3ZCT5	Pald1	Phosphatase domain-containing, paladin 1 OS=Rattus norvegicus OX=10116 GN=Pald1 PE=1 SV=1	22	16	112	16	1	857	96.8	6.42	281.09	16	0	18638918.33	16447290.96	15315110.4	14763314.47	24623409.23	13227893.46	8436454.414	885456.9841	22359994.22	10604012.93	10654195.77	23545262.28
D3ZCT7	Sec23b	Protein transport protein SEC23 OS=Rattus norvegicus OX=10116 GN=Sec23b PE=1 SV=2	34	19	190	16	1	767	86.3	6.93	506.08	19	0	28764276.13	21778129.64	19589004.4	19724696.57	33164413.45	21273789.72	16482392.37	8991488.638	25788749.68	21687183.73	39894071.21	33496281.26
D3ZCV2	Cst7	Cystatin OS=Rattus norvegicus OX=10116 GN=Cst7 PE=3 SV=1	9	1	1	1	1	148	16.8	8.48	2.4	1	0	NA	441641.6563	507382.1789	580972.856	516047.2684	603922.1107	NA	693646.9903	NA	213789.0632	NA	NA
D3ZCW5	Alg9	Mannosyltransferase OS=Rattus norvegicus OX=10116 GN=Alg9 PE=1 SV=1	13	3	7	3	1	429	47.7	8.46	17.42	3	0	305155.7897	352447.5	467571.3927	273381.4085	448901.8325	347568.4127	149606.2322	240123.461	184688.7868	337746.8302	491579.1183	132710.9541
D3ZCZ3	Cys1	Cystin 1 OS=Rattus norvegicus OX=10116 GN=Cys1 PE=4 SV=1	26	2	7	2	1	145	15.6	5.1	18.3	2	0	985848.1527	847839.125	738805.6247	767388.0484	890259.0575	321809.4659	1210961.048	NA	NA	NA	NA	1352214.483
D3ZCZ9	LOC679739	NADH dehydrogenase [ubiquinone] iron-sulfur protein 6, mitochondrial OS=Rattus norvegicus OX=10116 GN=LOC100912599 PE=1 SV=1	33	3	37	3	1	116	13	9.22	100.29	3	0	10527818	6336423.688	60574342.46	39444840.06	8658608.266	8256077.516	4755002.977	3885043.914	375410.577	2089672.746	2475554.053	3303829.997
D3ZD03	Tyk2	Tyrosine-protein kinase OS=Rattus norvegicus OX=10116 GN=Tyk2 PE=1 SV=1	1	1	1	1	1	1186	133.2	7.11	0	1	0	292307.2321	329574.7813	367406.4427	321719.8563	251781.9132	436997.7882	NA	238639.4455	678952.16	250179.3834	156635.7897	416521.7607
D3ZD05	Kank2	KN motif and ankyrin repeat domain-containing protein 2 OS=Rattus norvegicus OX=10116 GN=Kank2 PE=1 SV=2	21	12	82	12	1	847	90.8	5.43	189.18	12	0	10383218.61	9819763.813	13694794.69	9258439.496	6422726.003	11111764.06	6716431.302	8131360.199	12923821.7	10831685.46	10961386.48	8688455.272
D3ZD09	LOC688869	Cytochrome c oxidase subunit OS=Rattus norvegicus OX=10116 GN=Cox6b1 PE=1 SV=1	52	4	86	4	1	86	10.1	8.72	194.28	4	0	34633876.81	33658690	71853603.21	74214319.17	44419264.84	19562731.59	22222251.51	40214706.06	9878658.392	27514766.34	27824621.23	19621334.82
D3ZD11	Spcs2	Signal peptidase complex subunit 2 OS=Rattus norvegicus OX=10116 GN=Spcs2 PE=1 SV=1	46	8	119	8	1	226	25	8.57	330.87	8	0	41092023.67	31399089.16	49093355.57	32246187.36	37109176.01	41538166.45	29783862.17	46031586.71	42650677.78	34856943.13	39445932.62	43777384.35
D3ZD19	Lyve1	Extracellular link domain-containing 1 (Predicted) OS=Rattus norvegicus OX=10116 GN=Lyve1 PE=1 SV=1	13	4	39	4	1	343	37.2	7.72	66.07	4	0	12830404.84	14924491	8203106.575	8466234.134	13279864.61	8332164.148	5730874.463	6967290.637	3260034.694	1601602.147	2505404.346	3620835.432
D3ZD23	Abce1	ATP-binding cassette subfamily E member 1 OS=Rattus norvegicus OX=10116 GN=Abce1 PE=1 SV=1	31	14	118	14	1	599	67.3	8.34	282.63	14	0	15952501.38	8277487.516	9044217.991	9921212.032	10021848.8	8122562.331	37157778.43	25156344.96	26473300.28	6830408.19	16519902.02	28280326.07
D3ZD31	Mrc1	Mannose receptor, C type 1 OS=Rattus norvegicus OX=10116 GN=Mrc1 PE=1 SV=3	37	44	587	44	1	1456	164.9	6.86	1335.97	44	0	203902142.6	223019004.4	180128125.3	154799790.9	203619190.6	217169463.8	225468981.2	110517217.3	475431545.4	374998811.3	522657258.2	377168902.1
D3ZD46	Dhx58	DEXH-box helicase 58 OS=Rattus norvegicus OX=10116 GN=Dhx58 PE=1 SV=1	3	2	4	2	1	678	76.9	7.94	9.16	2	0	745406.5735	82408.13281	772440.859	535696.8736	70616.48546	614908.7891	911240.1132	903292.5891	5172850.475	127385.6398	176227.4638	226514.7741
D3ZD71	Efhc1	EF-hand domain-containing 1 OS=Rattus norvegicus OX=10116 GN=Efhc1 PE=1 SV=1	2	1	1	1	1	648	74.9	6.14	0	1	0	NA	NA	NA	NA	NA	NA	133751.1349	NA	NA	NA	NA	NA
D3ZD73	Ddx6	DEAD-box helicase 6 OS=Rattus norvegicus OX=10116 GN=Ddx6 PE=1 SV=1	28	10	69	10	1	483	54.2	8.66	149.53	10	0	16563065.47	10700439.1	14645891.52	9632955.724	12214914.23	10526877.08	21527594.57	12208872.03	19380015.22	15489113.18	13936383.03	22981481.88
D3ZD83	Mfsd10	Major facilitator superfamily domain-containing 10 OS=Rattus norvegicus OX=10116 GN=Mfsd10 PE=1 SV=1	3	1	5	1	1	456	49.4	9.91	10.29	1	0	229570.2402	434374.3125	258357.106	NA	444964.782	260943.3096	NA	NA	475769.3669	718642.8291	674299.4761	500650.7
D3ZD88	Cd22	CD22 antigen (Predicted) OS=Rattus norvegicus OX=10116 GN=Cd22 PE=1 SV=1	2	1	1	1	1	852	95.4	7.81	1.85	1	0	NA	NA	NA	NA	NA	NA	NA	NA	NA	NA	NA	NA
D3ZD89	Naa15	N(alpha)-acetyltransferase 15, NatA auxiliary subunit OS=Rattus norvegicus OX=10116 GN=Naa15 PE=1 SV=2	10	7	18	7	1	865	100.9	7.61	30.71	7	0	4872147.633	1729309.125	1917514.145	2077185.894	2413611.751	577418.9656	6923252.635	5339523.192	7228539.641	3098159.18	5892148.594	9297031.048
D3ZD97	Dhx15	DEAH (Asp-Glu-Ala-His) box polypeptide 15 (Predicted), isoform CRA_b OS=Rattus norvegicus OX=10116 GN=Dhx15 PE=1 SV=1	10	7	53	7	1	795	90.9	7.46	90.82	7	0	15599283.07	2057789.402	5820985.52	5675895.955	2997377.57	1944602.139	3183141.599	5481914.619	5338324.104	5970355.069	6400133.079	7305792.89
D3ZDC2	Slc43a2	Solute carrier family 43 member 2 OS=Rattus norvegicus OX=10116 GN=Slc43a2 PE=1 SV=1	4	2	4	2	1	568	62.5	7.65	12.42	2	0	NA	126442.3125	141412.823	157305.5528	NA	NA	NA	NA	NA	231087.7412	NA	186443.2391
D3ZDE4	Dguok	Deoxyguanosine kinase OS=Rattus norvegicus OX=10116 GN=Dguok PE=1 SV=1	22	4	25	4	1	278	32.2	7.96	60.93	4	0	3662563.06	6182112.375	5341168.44	7360428.327	8479514.193	4887379.39	1260178.797	1270115.333	1502778.526	2143932.756	2562671.655	770147.126
D3ZDH8	5-Sep	Septin 5, isoform CRA_d OS=Rattus norvegicus OX=10116 GN=Sept5 PE=1 SV=1	9	3	21	2	1	378	43.9	6.67	45.21	3	0	716431.3749	689589.125	914721.6861	905149.449	880516.894	823586.1583	823505.0822	NA	1394216.8	1906458.513	260022.3051	882631.8197
D3ZDI7	Ppp2r5a	Serine/threonine-protein phosphatase 2A 56 kDa regulatory subunit OS=Rattus norvegicus OX=10116 GN=Ppp2r5a PE=1 SV=1	10	4	19	4	1	486	56.3	6.86	46.03	4	0	2616186.257	3130388.188	2176548.3	1643251.625	4907796.354	4132790.694	3522110.816	3281778.137	2410835.251	2938950.989	3726782.352	2493007.472
D3ZDJ4	Unc93b1	Unc-93 homolog B1 (C. elegans) OS=Rattus norvegicus OX=10116 GN=Unc93b1 PE=4 SV=1	9	4	17	4	1	630	70.8	6.6	16.44	4	0	973828.4045	1357622.557	3311244.947	1794074.356	2545316.96	1488676.728	571855.8901	530267.4719	1485604.375	2436915.867	4284771.334	2823281.224
D3ZDK7	Pgp	Glycerol-3-phosphate phosphatase OS=Rattus norvegicus OX=10116 GN=Pgp PE=1 SV=1	5	1	2	1	1	321	34.6	5.35	3.8	1	0	NA	NA	NA	NA	NA	NA	NA	NA	NA	NA	NA	NA
D3ZDR2	Chmp6	Charged multivesicular body protein 6 OS=Rattus norvegicus OX=10116 GN=Chmp6 PE=1 SV=1	20	3	35	3	1	200	23.3	5.31	94.4	3	0	7146317.423	6235700.75	4673445.408	3954641.835	6338072.294	3818074.389	7086336.197	633937.2226	4051253.554	2261503.393	4764847.501	7312637.523
D3ZDS2	Msr1	Macrophage scavenger receptor 1 OS=Rattus norvegicus OX=10116 GN=Msr1 PE=1 SV=3	6	3	23	3	1	509	55.6	6.98	69.42	3	0	327239.3495	661310.7813	768807.568	NA	1414557.845	1563840.671	1008421.508	3524709.549	3694679.574	6478663.435	7531774.567	2760356.698
D3ZDT1	Epb41l2	Erythrocyte membrane protein band 4.1-like 2 OS=Rattus norvegicus OX=10116 GN=Epb41l2 PE=1 SV=3	46	33	389	1	1	926	102.5	5.35	1017.56	33	0	9825944.36	8177903.5	3980426.118	7281760.911	7239801.861	8965597.332	11432938.33	NA	2624628.56	NA	4349021.067	5907363.767
D3ZDU2	Rptor	Regulatory-associated protein of MTOR, complex 1 OS=Rattus norvegicus OX=10116 GN=Rptor PE=1 SV=2	11	11	55	11	1	1335	149.4	6.87	124.67	11	0	6368642.512	6787831.695	12614546.11	8329700.348	8672229.789	6433481.471	6677533.955	14264139.71	9388612.86	6385533.328	8360137.117	10961269.92
D3ZDV2	Eps8l1	EPS8-like 1 OS=Rattus norvegicus OX=10116 GN=Eps8l1 PE=1 SV=1	18	11	69	11	1	717	80	6.43	161.64	11	0	17237273.28	29988645.13	16493384.01	18982970.01	24859431.06	23679128.62	31969786.63	81927.03984	21768752.55	17352581	24358464.27	20138615.46
D3ZDX5	Plxnb1	Plexin B1 OS=Rattus norvegicus OX=10116 GN=Plxnb1 PE=1 SV=1	2	3	11	3	1	2121	231.7	5.6	21.21	3	0	409134.6497	425756.8359	628278.3072	216737.2404	53991.10131	753892.472	429846.1787	472066.3372	461945.7685	383450.1388	87764.76083	109480.7783
D3ZDZ1	Apbb1ip	Amyloid beta (A4) protein-binding, family B, member 1 interacting protein OS=Rattus norvegicus OX=10116 GN=Apbb1ip PE=1 SV=2	9	4	25	4	1	664	73.6	5.4	63.37	4	0	383654.5741	868332.2031	1175344.628	NA	922186.5638	883354.5077	2955490.373	NA	1908469.541	2483363.084	1426908.121	3075636.613
D3ZE00	#N/A	Uncharacterized protein OS=Rattus norvegicus OX=10116 PE=1 SV=3	28	2	31	1	1	98	10.8	6.58	99.17	2	0	165838.3563	244108.8281	NA	NA	235062.3051	NA	3000919.761	NA	171023.2247	725332.0517	NA	NA
D3ZE02	LOC100361913	Immortalization up-regulated protein-like OS=Rattus norvegicus OX=10116 GN=LOC100361913 PE=1 SV=2	13	1	14	1	1	104	10.7	9.72	36.12	1	0	693570.8891	68168.78906	700895.3209	NA	NA	390289.0521	558510.6006	247898.6275	3650627.766	2620354.707	NA	57012.41516
D3ZE15	LOC100911483	NADH:ubiquinone oxidoreductase subunit A13 OS=Rattus norvegicus OX=10116 GN=Ndufa13 PE=1 SV=1	28	4	77	4	1	144	16.8	9.48	173.51	4	0	15902789.36	21358688.75	38075952.48	24730433.91	25329179.93	20079918.69	9167887.645	20468984.21	14182332.16	28115638.2	25429371.51	11976857.45
D3ZE26	Tmcc2	Similar to RIKEN cDNA 1110063G11 (Predicted) OS=Rattus norvegicus OX=10116 GN=Tmcc2 PE=1 SV=1	17	8	33	8	1	706	77.1	6.76	87.51	8	0	10391532.16	9415698.59	6182820.758	3158640.924	10297368.46	6829331.75	6404859.681	777003.9948	4304853.365	1346577.783	11502775.52	3641516.161
D3ZE30	Bcar1	Breast cancer anti-estrogen resistance protein 1 OS=Rattus norvegicus OX=10116 GN=Bcar1 PE=1 SV=2	1	1	3	1	1	968	104.2	6.28	6.82	1	0	248776.413	1177615.469	2029285.505	1619163.026	1200463.186	1311238.678	612690.2723	1361365.847	265991.8628	950815.7313	NA	NA
D3ZE49	Trappc12	Trafficking protein particle complex 12 OS=Rattus norvegicus OX=10116 GN=Trappc12 PE=1 SV=1	17	10	27	10	1	797	87.5	4.78	61.89	10	0	10823505.31	9458121.25	5646099.254	6241819.033	10396318.13	8612778.1	11895556.08	6416895.099	6360999.771	6826013.876	9119818.749	9200669.196
D3ZE59	Tmem115	Transmembrane protein 115 OS=Rattus norvegicus OX=10116 GN=Tmem115 PE=1 SV=1	5	1	4	1	1	350	38	7.85	6.96	1	0	581685.755	464533.3438	987767.0945	741017.0419	NA	924965.8412	NA	310766.4517	NA	233344.1186	NA	414741.4661
D3ZE63	LOC679748	Uncharacterized protein OS=Rattus norvegicus OX=10116 PE=4 SV=1	8	1	22	1	1	115	12.6	7.9	42.94	1	0	6749113.235	7698617.5	7835743.463	8413183.262	5587191.296	8193661.76	9961547.428	11127183.09	7271060.101	4022399.857	1771999.074	3128718.737
D3ZE72	Metap1	Methionine aminopeptidase OS=Rattus norvegicus OX=10116 GN=Metap1 PE=1 SV=1	19	5	16	5	1	386	43.2	7.17	36.58	5	0	3585025.024	2517739.859	452561.3733	1577919.449	2517199.447	702872.2689	2842816.181	4214468.453	4493203.105	3899410.136	1456624.353	3524354.702
D3ZE91	Kctd9	Potassium channel tetramerisation domain containing 9 (Predicted), isoform CRA_b OS=Rattus norvegicus OX=10116 GN=Kctd9 PE=4 SV=1	3	1	2	1	1	389	42.5	6.54	4.19	1	0	521760.252	407988.5938	753648.3856	894017.4906	437044.4402	429543.4211	NA	1092124.926	442408.1228	497431.704	658827.3027	382875.9139
D3ZEA0	Fndc3a	Fibronectin type III domain containing 3a (Predicted), isoform CRA_a OS=Rattus norvegicus OX=10116 GN=Fndc3a PE=1 SV=2	9	6	13	6	1	1170	128.9	6.83	31.47	6	0	2046338.418	1929937.656	1327503.558	1183693.002	1937863.706	497206.2178	668461.8361	3070947.496	764837.0937	860489.4738	1773692.909	3456601.844
D3ZEE9	Fads6	Fatty acid desaturase 6 OS=Rattus norvegicus OX=10116 GN=Fads6 PE=1 SV=1	4	1	2	1	1	342	38.7	8.59	4.23	1	0	NA	243125.2656	209689.5027	NA	NA	235170.3363	NA	4128599.3	NA	NA	NA	NA
D3ZEG8	RGD1309188	Translocase of inner mitochondrial membrane 29 OS=Rattus norvegicus OX=10116 GN=Timm29 PE=1 SV=1	16	3	11	3	1	267	29.9	8.03	26.85	3	0	254227.4189	919864.7969	1266803.181	913489.9624	1163710.09	699554.5635	171658.5242	573621.9573	NA	239474.3055	825641.0682	158584.6071
D3ZEH6	Nudt8	Nudix hydrolase 8 OS=Rattus norvegicus OX=10116 GN=Nudt8 PE=1 SV=1	6	1	1	1	1	210	23.1	6.93	1.96	1	0	NA	NA	NA	NA	NA	NA	NA	NA	NA	NA	NA	NA
D3ZEI0	LOC690096	Uncharacterized protein OS=Rattus norvegicus OX=10116 PE=4 SV=2	22	4	36	4	1	144	16.5	11.59	78.9	4	0	58509224.91	25283444.25	23490520	21268526.21	23448354.95	35047443.16	70520575.93	124924477.4	56097579.47	4760981.647	25565949.41	56912239.59
D3ZEJ2	Mcur1	Mitochondrial calcium uniporter regulator 1 OS=Rattus norvegicus OX=10116 GN=Mcur1 PE=1 SV=1	7	2	10	2	1	336	37.5	10.26	25.37	2	0	3203759.031	4298841.75	5228674.636	5329782.604	3199014.493	4378379.234	684678.5394	457534.5572	684708.0874	3497807.683	3687972.425	1219520.335
D3ZEJ9	RGD1310429	Similar to Protein Njmu-R1 OS=Rattus norvegicus OX=10116 GN=RGD1310429 PE=1 SV=2	12	3	4	3	1	393	44.4	5.05	10.02	3	0	262772.623	322131.5039	479716.6634	313082.4567	592584.6366	229228.3649	1480849.321	118742.958	748167.3139	227437.9824	570887.1438	765445.5904
D3ZEP5	#N/A	Uncharacterized protein OS=Rattus norvegicus OX=10116 PE=1 SV=3	19	1	2	1	1	97	10.6	4.64	4.89	1	0	NA	NA	NA	NA	NA	NA	653199.0228	NA	179830.4107	240174.1474	NA	NA
D3ZER6	Tnpo2	Transportin 2 OS=Rattus norvegicus OX=10116 GN=Tnpo2 PE=1 SV=2	7	5	18	2	1	913	102.8	5	39.23	5	0	16512.20004	66639.17188	NA	NA	125975.477	NA	39280.14499	44060.08344	67660.32804	175139.3889	75246.22398	64693.51131
D3ZES2	Trappc6b	Trafficking protein particle complex 6B OS=Rattus norvegicus OX=10116 GN=Trappc6b PE=1 SV=1	14	2	4	2	1	158	18	8.68	4.8	2	0	710223.1635	396636.1563	708446.2985	955313.6523	948517.4608	222331.3444	114206.0791	69069.87665	182188.8543	750369.7239	174098.7017	651793.4385
D3ZEW3	LOC100912416	TRPM8 channel-associated factor 2 OS=Rattus norvegicus OX=10116 GN=Tcaf2 PE=4 SV=2	5	3	25	3	1	919	101	6.74	50.7	3	0	3586907.795	2910551.188	827859.0916	537321.984	1613402.256	2965292.715	1192880.711	1064314.395	2796188.808	962870.3863	410012.0507	3932809.94
D3ZEY0	Ccdc141	Coiled-coil domain-containing 141 OS=Rattus norvegicus OX=10116 GN=Ccdc141 PE=1 SV=2	4	4	13	4	1	1530	173.4	6.02	35.02	4	0	992503.2177	1748168.531	982104.3973	394804.7136	973298.911	868521.3772	4521163.083	1605611.518	1124605.55	3501888.345	1431534.237	1440299.843
D3ZEY4	Dgkq	Diacylglycerol kinase OS=Rattus norvegicus OX=10116 GN=Dgkq PE=1 SV=1	1	1	3	1	1	937	102.5	7.3	6.13	1	0	120231.5123	133058.5469	77654.19798	116528.2678	155613.1356	68980.66216	192015.1583	144017.7823	263696.8587	75406.29206	260379.8464	296675.7908
D3ZF11	Lamtor5	Hepatitis B virus x interacting protein (Predicted), isoform CRA_a OS=Rattus norvegicus OX=10116 GN=Lamtor5 PE=1 SV=1	32	3	26	3	1	156	16.4	5.74	83.91	3	0	4410243.781	2994567.938	10224527.3	6727120.758	3925010.007	4320005.049	8561643.58	2599165.779	4813402.375	7669443.964	2952522.552	4652181.154
D3ZF12	Spcs3	Signal peptidase complex subunit 3 OS=Rattus norvegicus OX=10116 GN=Spcs3 PE=1 SV=1	18	3	54	3	1	180	20.3	8.62	121.14	3	0	37136538.81	33310862	43045985.31	32489647.81	31462741.2	35368989.01	17520650.2	35430116.74	25497574.49	20635924.53	51673065.42	34992417.74
D3ZF13	Ndufab1	Acyl carrier protein OS=Rattus norvegicus OX=10116 GN=Ndufab1 PE=1 SV=1	21	4	61	4	1	156	17.5	5.07	135.19	4	0	13669170.98	20113321.88	33827024.72	24628614.83	20637512.13	18621666.68	10980170.32	14874008.91	2359349.159	21464911.98	18634130.41	7506681.231
D3ZF16	Lmf1	Lipase maturation factor OS=Rattus norvegicus OX=10116 GN=Lmf1 PE=1 SV=3	4	2	3	2	1	575	65.9	9.22	7.67	2	0	619768.467	199176.375	887891.8048	667115.0438	1022666.712	540860.602	545613.6819	1864470.165	166925.5823	446134.4424	2543203.958	3818373.629
D3ZF21	Gprin3	GPRIN family member 3 OS=Rattus norvegicus OX=10116 GN=Gprin3 PE=1 SV=2	2	1	1	1	1	762	81.3	6.6	2.71	1	0	NA	NA	NA	NA	NA	NA	NA	NA	NA	NA	NA	NA
D3ZF26	Tnks1bp1	Tankyrase 1-binding protein 1 OS=Rattus norvegicus OX=10116 GN=Tnks1bp1 PE=1 SV=1	18	20	117	20	1	1705	179.9	4.79	292.09	20	0	16187222.5	15132108.2	18047158.01	21529251.91	18650636.79	15522839.09	26989863.88	3100431.608	13080037.3	8604505.078	10610301.44	13570109.84
D3ZF39	Uap1	UDP-N-acetylglucosamine pyrophosphorylase 1 OS=Rattus norvegicus OX=10116 GN=Uap1 PE=1 SV=2	3	1	1	1	1	521	58.4	6.44	2.61	1	0	7529982.367	7645056	10521709.42	9375772.508	10765978.21	7362783.62	3043136.824	2828460.206	2003331.447	3073752.807	2167401.617	3115412.631
D3ZF45	Larp4b	La ribonucleoprotein domain family, member 4B OS=Rattus norvegicus OX=10116 GN=Larp4b PE=1 SV=2	3	2	4	2	1	737	81	7.69	4.63	2	0	8407.1905	14609.0957	NA	145663.595	244113.8908	NA	226871.3166	449850.3039	44206.37528	NA	417910.5205	392743.4499
D3ZF49	Tmprss6	Transmembrane serine protease 6 OS=Rattus norvegicus OX=10116 GN=Tmprss6 PE=1 SV=1	2	1	1	1	1	772	86.3	5.88	2.67	1	0	NA	NA	NA	NA	NA	NA	NA	NA	NA	NA	NA	NA
D3ZF54	Ano10	Anoctamin OS=Rattus norvegicus OX=10116 GN=Ano10 PE=1 SV=2	10	5	58	5	1	688	79	6.7	146.16	5	0	4825525.258	7607436.875	5105528.657	4349705.208	7728228.531	4794364.278	6966563.668	5219883.668	6983980.909	7595942.723	12943440.6	12349170.52
D3ZF64	Abcc3	Canalicular multispecific organic anion transporter 2 OS=Rattus norvegicus OX=10116 GN=Abcc3 PE=1 SV=3	6	7	12	6	1	1523	169	6.87	19.45	7	1	1603219.24	2222858.313	2154336.312	1894250.139	1690031.979	2244738.601	2301811.397	36876.09863	4575246.962	1635082.453	2826369.793	1722008.407
D3ZF97	Erlec1	Endoplasmic reticulum lectin 1 OS=Rattus norvegicus OX=10116 GN=Erlec1 PE=1 SV=2	19	7	41	7	1	482	54.6	6.4	96.02	7	0	8868029.776	6634617.215	5133790.989	8774952.844	7767371.893	9480404.556	6521551.838	12497540.96	4285374.549	6232907.488	10422507.8	8178909.797
D3ZFA8	LOC100362366	40S ribosomal protein S17-like OS=Rattus norvegicus OX=10116 GN=LOC100362366 PE=3 SV=1	56	6	54	6	1	135	15.5	9.77	143.06	6	0	24311877.97	14821245.28	14030517.57	12066386	15799023.41	11785543.59	23146229.85	45480623.79	30412758.7	14697772.04	28727244.79	39149593.89
D3ZFB2	Luc7l3	LUC7-like 3 pre-mRNA-splicing factor OS=Rattus norvegicus OX=10116 GN=Luc7l3 PE=1 SV=1	7	2	10	2	1	491	58.4	9.95	31.07	2	0	3400137.493	1736825.125	1045558.399	1063220.138	975458.8817	1919719.189	817624.0049	1368325.69	1059218.499	1171356.084	2044549.763	1840756.468
D3ZFC5	Atp11c	Phospholipid-transporting ATPase OS=Rattus norvegicus OX=10116 GN=Atp11c PE=1 SV=3	22	20	74	17	1	1130	129.1	6.87	165.94	20	0	5963289.226	6244649.82	4939310.866	4681681.145	8920817.751	6186216.246	5959487.394	61959521.65	9448576.363	6330979.864	8894549.883	9608744.238
D3ZFF4	Lclat1	Lysocardiolipin acyltransferase 1 OS=Rattus norvegicus OX=10116 GN=Lclat1 PE=1 SV=1	13	5	26	5	1	376	44.5	8.65	56.34	5	0	7326238.916	5810813	9669170.324	5206189.828	5828982.936	9570395.351	7450085.749	13635524.18	5589827.588	7717699.579	2953931.631	6936144.673
D3ZFH5	Itih2	Inter-alpha-trypsin inhibitor heavy chain 2 OS=Rattus norvegicus OX=10116 GN=Itih2 PE=1 SV=3	15	9	99	9	1	826	92.3	6.7	228.45	9	0	3817279.376	4589799.469	3455023.335	3923046.686	5630523.075	3348976.724	28734408.52	20497050.37	28691646.3	27911170.63	56352834.18	31758190.94
D3ZFJ3	Sh3bp1	SH3 domain-binding protein 1 OS=Rattus norvegicus OX=10116 GN=Sh3bp1 PE=1 SV=1	15	7	27	7	1	689	74.8	6.6	66.85	7	0	494405.5179	437351.7344	358255.2619	1431842.666	1071066.306	578398.1318	1347575.321	653775.3258	3395446.637	2589746.443	2544424.527	4373272.182
D3ZFJ6	Lactb	Lactamase, beta OS=Rattus norvegicus OX=10116 GN=Lactb PE=1 SV=1	17	8	26	8	1	550	60.4	8.82	38.28	8	0	6109259.199	8034273.92	11080393.53	9392859.702	6670327.422	8012963.217	6799999.233	42605434.56	5201333.641	9652305.607	9557874.232	8729433.499
D3ZFK5	Spcs1	RCG42279 OS=Rattus norvegicus OX=10116 GN=Spcs1 PE=1 SV=3	8	2	25	2	1	162	18.1	9.6	37.08	2	0	18879777.83	17686275.75	22476477.65	22752875.36	21465437.62	18324720.04	7854331.382	13447137.75	9195361.37	10924082.57	17595057.95	12626600.79
D3ZFK8	Farp2	FERM, ARH/RhoGEF and pleckstrin domain protein 2 OS=Rattus norvegicus OX=10116 GN=Farp2 PE=1 SV=1	3	2	2	2	1	1060	120.7	8.22	5.14	2	0	NA	NA	230146.7139	85135.64481	NA	NA	NA	1801718.924	80680.56322	112861.0758	179132.2903	206359.7926
D3ZFL3	Map3k6	Mitogen-activated protein kinase kinase kinase 6 OS=Rattus norvegicus OX=10116 GN=Map3k6 PE=4 SV=1	2	2	3	2	1	1292	143.1	6.6	6.97	2	0	222804.721	165765.5313	NA	159456.5267	337571.2164	135192.2549	254436.6736	NA	425911.0038	NA	366997.4855	510592.2608
D3ZFN9	Kif16b	Kinesin family member 16B OS=Rattus norvegicus OX=10116 GN=Kif16b PE=3 SV=1	2	2	3	1	1	1311	150	6.48	5.58	2	0	168712.2219	265091.4688	251560.9129	144523.7575	NA	206793.3905	NA	NA	220053.5411	NA	NA	NA
D3ZFP4	Mcm3	DNA helicase OS=Rattus norvegicus OX=10116 GN=Mcm3 PE=1 SV=3	6	3	4	3	1	813	91.6	5.48	8.94	3	0	70820.02266	NA	NA	NA	NA	NA	486257.9925	NA	1255452.609	NA	NA	989820.2454
D3ZFQ8	Cyc1	Cytochrome c-1 OS=Rattus norvegicus OX=10116 GN=Cyc1 PE=1 SV=3	37	8	198	8	1	326	35.4	9.26	489.97	8	0	59196816.95	61018075.77	107846276.3	90377638.81	44759949.7	75141033.29	32816376.46	43099464.11	29334133.75	62216339.6	35524963.24	34121942.41
D3ZFR7	Pdlim3	PDZ and LIM domain 3, isoform CRA_b OS=Rattus norvegicus OX=10116 GN=Pdlim3 PE=1 SV=1	3	1	3	1	1	364	39.4	6.77	7.98	1	0	934468.1308	NA	NA	1290540.892	1289252.667	1065395.872	1448300.496	NA	813995.3459	578188.7106	1008896.035	953721.8467
D3ZFU9	Mylk	Myosin light chain kinase OS=Rattus norvegicus OX=10116 GN=Mylk PE=1 SV=2	25	36	282	35	1	1961	214.8	6.02	647.27	36	1	61732040.52	78976289	82459870.29	92984107.65	67254615.58	74737528.68	64001803.01	19011000.26	56596146.23	67574661.05	64862570.49	80441968.14
D3ZFX1	Tmem164	Similar to Expressed sequence AW547186 (Predicted), isoform CRA_a OS=Rattus norvegicus OX=10116 GN=Tmem164 PE=4 SV=1	5	1	26	1	1	296	33.4	8.16	63.68	1	0	2001024.227	2096032.063	3523559.76	2004401.992	4322367.936	3222068.026	NA	NA	244921.7006	1088646.712	1971132.541	1810000.402
D3ZFX4	Pgm3	Phosphoacetylglucosamine mutase OS=Rattus norvegicus OX=10116 GN=Pgm3 PE=1 SV=1	9	4	17	4	1	552	60.8	6.77	41.57	4	0	4296525.249	3914988.914	8895714.825	4893331.542	2108441.784	4755195.041	2878708.718	3140563.628	7672524.98	4409886.007	3296194.503	3362583.604
D3ZFY0	Sephs1	Selenophosphate synthetase 1 OS=Rattus norvegicus OX=10116 GN=Sephs1 PE=1 SV=1	6	2	3	2	1	392	42.9	5.97	3.35	2	0	NA	NA	137107.0295	NA	NA	133638.4142	114425.5941	1379614.311	622697.738	460331.014	454915.9449	365762.4433
D3ZFY8	Ube2v1	Ubiquitin-conjugating enzyme E2 V1 OS=Rattus norvegicus OX=10116 GN=LOC100912618 PE=1 SV=1	18	3	39	3	1	147	16.3	7.96	28.63	3	0	8563225.136	8691246.5	7853213.775	11168186.87	4853704.638	8219192.802	6368664.44	4350296.482	5342474.641	3149844.713	5225975.006	3659650.779
D3ZG10	Grap2	GRB2-related adaptor protein 2 OS=Rattus norvegicus OX=10116 GN=Grap2 PE=1 SV=3	2	1	1	1	1	327	37.5	7.3	1.79	1	0	40589.11103	NA	57409.45543	53031.68945	NA	NA	128421.5552	NA	235378.3877	NA	NA	104792.9816
D3ZG43	Ndufs3	NADH dehydrogenase (Ubiquinone) Fe-S protein 3 (Predicted), isoform CRA_c OS=Rattus norvegicus OX=10116 GN=Ndufs3 PE=1 SV=1	35	9	191	9	1	264	30.2	7.53	482.91	9	0	23754567.53	29106128.56	39196444.89	33523584.13	33718234.57	26568906.54	30146950.74	57766215.27	24004220.4	48644755.51	38347380.61	30943464.9
D3ZG57	Tor4a	RCG45397 OS=Rattus norvegicus OX=10116 GN=Tor4a PE=1 SV=1	3	1	1	1	1	434	48.4	8.62	2.27	1	0	866541.2348	NA	NA	NA	NA	NA	NA	NA	NA	NA	NA	NA
D3ZG74	Frem2	Fras1-related extracellular matrix protein 2 OS=Rattus norvegicus OX=10116 GN=Frem2 PE=4 SV=2	0	1	2	1	1	3158	350.1	5.1	3.72	1	0	192198.1783	255250.0469	261662.5594	405683.1367	322099.2747	152625.9632	NA	NA	NA	NA	433639.0955	90673.02673
D3ZG78	Zzef1	Zinc finger ZZ-type and EF-hand domain-containing 1 OS=Rattus norvegicus OX=10116 GN=Zzef1 PE=1 SV=2	4	9	16	9	1	2965	332.2	5.95	40.26	9	0	931105.7302	1236861.969	609081.944	457712.6689	768661.0322	801669.5413	4052885.331	384807.4364	4369108.665	1256735.26	207451.7042	2367656.577
D3ZG84	Rnft1	Ring finger protein, transmembrane 1 OS=Rattus norvegicus OX=10116 GN=Rnft1 PE=1 SV=1	4	1	8	1	1	397	45.5	8.28	17.4	1	0	229249.5279	NA	NA	48197.33779	78287.37053	NA	133042.06	NA	145712.5662	274304.9958	NA	293848.2575
D3ZG88	Sssca1	Mammary tumor virus receptor 2, isoform CRA_a OS=Rattus norvegicus OX=10116 GN=Sssca1 PE=1 SV=1	42	4	8	4	1	199	21.3	5.12	20.47	4	0	2647906.679	1969983.516	3046608.761	231596.0223	233510.4081	NA	4733969.961	NA	4094311.903	2248919.54	6821734.271	3760621.47
D3ZGA5	Rilp	Rab interacting lysosomal protein (Predicted) OS=Rattus norvegicus OX=10116 GN=Rilp PE=1 SV=2	2	1	1	1	1	366	41	5.12	1.63	1	0	888076.5216	1191491.125	1130157.145	884322.0272	1216412.264	1234379	NA	NA	673291.1419	760258.4038	459739.0521	271234.1365
D3ZGD0	Gemin5	Gem (nuclear organelle)-associated protein 5 OS=Rattus norvegicus OX=10116 GN=Gemin5 PE=1 SV=2	1	1	1	1	1	1497	166	6.99	2.55	1	0	NA	NA	NA	NA	NA	NA	NA	NA	NA	NA	NA	NA
D3ZGE6	Cttn	Cortactin, isoform CRA_c OS=Rattus norvegicus OX=10116 GN=Cttn PE=1 SV=3	24	12	68	12	1	546	61	5.31	153.48	12	0	31734715.16	23403581.13	28223894.01	17430382.31	25982032.88	28632780.01	22051982.59	10373223.77	12717384.48	10513624.43	14524511.73	16232621.94
D3ZGK7	Ces1c	Carboxylic ester hydrolase OS=Rattus norvegicus OX=10116 GN=Ces1c PE=1 SV=3	27	13	109	10	1	584	64.2	6.43	268.98	13	2	19573937.96	11940327.2	12530922.36	13757481.93	14966831.33	12890710.48	23637373.48	15336754.42	9091978.32	31366436.79	17547834.97	17336575.96
D3ZGL1	Arhgap25	Rho GTPase-activating protein 25 OS=Rattus norvegicus OX=10116 GN=Arhgap25 PE=1 SV=1	2	1	1	1	1	648	73.5	6.33	0	1	0	135246.9394	125403.0781	108295.2593	97446.66521	146818.4495	136743.6834	240512.0777	54391.91425	201844.2619	234731.0052	NA	NA
D3ZGL3	Hhip	Hedgehog-interacting protein OS=Rattus norvegicus OX=10116 GN=Hhip PE=4 SV=1	2	1	4	1	1	700	78.5	7.78	9.75	1	0	387871.3993	322784.9688	741329.2739	573824.6279	NA	NA	NA	NA	NA	NA	NA	NA
D3ZGM5	Ccdc167	Coiled-coil domain-containing 167 OS=Rattus norvegicus OX=10116 GN=Ccdc167 PE=1 SV=1	21	2	2	2	1	97	11.4	9.23	4.36	2	0	NA	NA	122994.537	627898.1089	481376.3282	NA	192620.1914	309158.1971	NA	NA	NA	72329.23214
D3ZGN0	Tbc1d4	TBC1 domain family, member 4 OS=Rattus norvegicus OX=10116 GN=Tbc1d4 PE=1 SV=3	7	6	24	6	1	1309	147.3	7.36	64.94	6	0	1578737.289	1248697.125	2012103.664	1066253.564	1491009.342	1453330.459	4529986.868	416137.7113	4823728.242	1785672.357	2891445.047	5199384.454
D3ZGS5	Uaca	Uveal autoantigen with coiled-coil domains and ankyrin repeats OS=Rattus norvegicus OX=10116 GN=Uaca PE=1 SV=2	6	7	31	7	1	1410	160.8	7.12	78.68	7	0	3997875.508	4135053.5	2683853.315	3326299.904	4041756.973	5065427.031	2063961.925	1010327.462	5355470.534	6619057.077	3817702.381	2381377.019
D3ZGT6	P4ha2	Procollagen-proline, 2-oxoglutarate 4-dioxygenase (Proline 4-hydroxylase), alpha II polypeptide (Predicted), isoform CRA_a OS=Rattus norvegicus OX=10116 GN=P4ha2 PE=1 SV=1	18	8	23	8	1	535	60.8	6	57.92	8	0	6683321.985	5898951.438	9984308.281	7418703.312	6480748.506	4081143.429	6618835.491	1459898.402	1752449.112	5210158.276	6127263.754	4589901.398
D3ZGU3	Clec1a	C-type lectin domain family 1 member A OS=Rattus norvegicus OX=10116 GN=Clec1a PE=2 SV=1	8	2	6	2	1	269	31	7.49	14.56	2	0	6536101.342	6298227	3791239.896	4514570.002	5696876.788	3544327.632	NA	392985.208	393835.9345	824335.5476	935310.7658	1718328.544
D3ZGW2	Ap1g2	AP-1 complex subunit gamma OS=Rattus norvegicus OX=10116 GN=Ap1g2 PE=1 SV=1	5	2	7	2	1	785	87.2	6.51	12.63	2	0	13701.62208	20302.25439	15832.83256	29954.52191	24772.72216	NA	275737.1946	47841.01528	49738.76663	135378.0857	NA	645414.061
D3ZGY2	Otud6b	OTU domain-containing 6B OS=Rattus norvegicus OX=10116 GN=Otud6b PE=1 SV=3	16	3	5	3	1	285	32.8	6.02	9.6	3	0	2257816.368	556009.5508	1219419.673	412483.413	449509.5274	848176.4201	5029269.48	1783881.913	1340563.275	234195.67	863903.1419	1284067.019
D3ZH23	RGD1560917	Similar to mitochondrial ribosomal protein L41 OS=Rattus norvegicus OX=10116 GN=RGD1560917 PE=4 SV=1	10	1	5	1	1	134	15.2	9.82	10.79	1	0	186018.6798	299016.375	461254.5466	423514.108	317815.4366	367770.5687	290034.1261	608180.7925	NA	776735.6032	793606.6136	297614.1548
D3ZH39	Ephb3	Eph receptor B3 OS=Rattus norvegicus OX=10116 GN=Ephb3 PE=3 SV=1	5	4	24	1	1	1048	115.5	6.14	50.53	4	0	NA	NA	NA	NA	NA	NA	NA	NA	NA	NA	NA	NA
D3ZH41	Ckap4	Cytoskeleton-associated protein 4 OS=Rattus norvegicus OX=10116 GN=Ckap4 PE=1 SV=2	65	18	296	18	1	326	36.3	4.82	729.57	18	0	192931710.6	210641942.1	321322535.9	203545466.3	240147844.9	231179820.7	239097098.3	17284043.23	191117940.9	266565310.3	259280916.1	240566117.6
D3ZH75	Akt1s1	AKT1 substrate 1 OS=Rattus norvegicus OX=10116 GN=Akt1s1 PE=1 SV=1	4	1	3	1	1	257	27.6	4.82	2.35	1	0	770764.1236	812108.0938	1149964.405	583792.3258	551017.0885	817924.6786	1054775.708	NA	585822.4933	323253.0723	685663.3623	898877.2898
D3ZHA0	Flnc	Filamin-C OS=Rattus norvegicus OX=10116 GN=Flnc PE=1 SV=1	11	24	234	14	1	2726	290.8	5.9	510.44	24	0	3377278.007	5281443.375	3674283.158	3734166.795	3526274.981	5355210.421	4827981.631	NA	5150038.865	12525666.27	7370089.66	2956315.262
D3ZHA1	B4gat1	Beta-1,4-glucuronyltransferase 1 OS=Rattus norvegicus OX=10116 GN=B4gat1 PE=1 SV=1	4	1	3	1	1	415	47.4	7.27	8.48	1	0	NA	236803.4531	392129.0359	322391.3167	455240.7666	NA	NA	NA	NA	NA	418292.7165	NA
D3ZHB5	Serpinb8	Serine (Or cysteine) peptdiase inhibitor, clade B, member 8 (Predicted) OS=Rattus norvegicus OX=10116 GN=Serpinb8 PE=1 SV=1	4	1	9	1	1	375	42.2	6.21	18.93	1	0	159194.4887	360088.5	188442.6743	323515.9885	654620.0923	281792.2247	846427.7658	124138.4435	369036.347	353281.6301	353854.381	NA
D3ZHB8	Tmem198	RCG23725, isoform CRA_a OS=Rattus norvegicus OX=10116 GN=Tmem198 PE=4 SV=1	3	1	1	1	1	360	39.7	9.99	2.73	1	0	NA	NA	NA	NA	NA	NA	NA	NA	NA	NA	NA	NA
D3ZHE5	Rab11fip4	RAB11 family-interacting protein 4 OS=Rattus norvegicus OX=10116 GN=Rab11fip4 PE=4 SV=1	3	1	2	1	1	637	72.1	4.86	3.32	1	0	2027387.304	1478157.125	3133038.201	2856235.326	2156760.364	4015412.155	3875720.62	128649.9354	1438371.227	435672.1661	3213161.141	1813806.761
D3ZHG0	Hacd2	Very-long-chain (3R)-3-hydroxyacyl-CoA dehydratase OS=Rattus norvegicus OX=10116 GN=Hacd2 PE=1 SV=3	5	1	4	1	1	254	28.3	9.55	8.36	1	0	2952517.421	NA	640705.0704	NA	1726922.719	1012410.671	3061202.55	8072569.438	2694260.184	NA	NA	2662243.403
D3ZHG3	Ptk7	Protein tyrosine kinase 7 OS=Rattus norvegicus OX=10116 GN=Ptk7 PE=3 SV=3	28	16	91	16	1	778	86.2	7.9	217.83	16	0	12365508.12	12628987.56	16537527.83	8298555.142	18525835.72	16236608.34	21197149.96	1442916.153	49838279.12	20044851.21	32332147.84	26187704.97
D3ZHJ6	Atp2a3	Calcium-transporting ATPase OS=Rattus norvegicus OX=10116 GN=Atp2a3 PE=1 SV=2	23	21	244	16	1	1061	116.2	5.69	654.84	21	0	27941909.05	34086116.22	26439761.69	22856024.71	34182075.48	40972511.87	15051759.89	1753185.904	5673987.942	6489271.599	9423694.32	23008457.98
D3ZHL6	Map4k5	Mitogen-activated protein kinase kinase kinase kinase OS=Rattus norvegicus OX=10116 GN=Map4k5 PE=1 SV=2	1	1	1	1	1	846	95	8	0	1	0	83247.46423	NA	NA	NA	NA	NA	209748.4206	NA	NA	NA	NA	NA
D3ZHN3	Trabd2b	TraB domain-containing 2B OS=Rattus norvegicus OX=10116 GN=Trabd2b PE=4 SV=1	2	1	1	1	1	516	57.3	7.46	1.66	1	0	216633.6348	732233.125	443568.976	853923.3109	827985.9073	403681.4643	NA	NA	NA	NA	NA	NA
D3ZHQ1	Dpp8	Dipeptidylpeptidase 8 OS=Rattus norvegicus OX=10116 GN=Dpp8 PE=1 SV=3	5	3	6	3	1	892	102.1	5.72	10.6	3	0	NA	483385.1406	NA	272941.3292	NA	640681.3086	552832.8026	304050.4919	1210758.64	NA	NA	790003.4138
D3ZHR2	Abcd1	ATP-binding cassette sub-family D member 1 OS=Rattus norvegicus OX=10116 GN=Abcd1 PE=1 SV=1	9	5	30	5	1	737	81.9	8.53	85.03	5	0	6874089.432	8155754.5	8029563.8	6733331.26	8300081.869	8684515.384	1326357.888	7261021.056	837915.4335	4787886.45	5777145.777	6262210.781
D3ZHV2	Macf1	Microtubule-actin cross-linking factor 1 OS=Rattus norvegicus OX=10116 GN=Macf1 PE=1 SV=1	30	129	906	2	1	5430	619.2	5.4	2243.51	129	0	1466298.38	3778391.875	NA	4145727.081	4814100.336	2838804.175	2373034.806	3343965.878	2496014.105	2764489.697	2146762.744	1724815.041
D3ZHV3	Mt1m	Metallothionein OS=Rattus norvegicus OX=10116 GN=Mt1m PE=3 SV=1	21	2	10	2	1	61	6.1	7.85	24.59	2	0	104881.7768	NA	NA	131012.0949	NA	NA	661474.7819	6173008.602	5383640.845	1140197.513	585611.0342	238920.4329
D3ZHV7	Sdsl	Serine dehydratase-like OS=Rattus norvegicus OX=10116 GN=Sdsl PE=1 SV=3	7	2	3	2	1	329	34.9	6.54	6.37	2	0	NA	NA	NA	86658.33858	233667.4762	89490.60435	NA	2416778.894	497534.0936	NA	215143.1637	280427.7458
D3ZHW0	Dhx29	ATP-dependent RNA helicase DHX29 OS=Rattus norvegicus OX=10116 GN=Dhx29 PE=1 SV=2	8	9	27	9	1	1366	154	8.12	62.94	9	0	1944085.798	1688327.925	1747349.406	1665611.394	19992.27453	1111704.677	6544050.246	4723611.238	5573857.191	1075059.196	5876874.06	6550171.277
D3ZHZ3	Osbpl3	Oxysterol-binding protein OS=Rattus norvegicus OX=10116 GN=Osbpl3 PE=1 SV=2	5	3	8	2	1	886	100.5	7.08	22.8	3	0	189695.8061	76943.29688	123093.3654	NA	NA	53270.0821	NA	NA	NA	NA	214830.1187	NA
D3ZI07	Kif3b	Kinesin-like protein OS=Rattus norvegicus OX=10116 GN=Kif3b PE=1 SV=1	6	4	9	3	1	747	85.2	7.69	22.46	4	1	1213425.69	296611.9063	465513.2832	NA	894970.1243	263912.3929	2671162.011	140848.841	2914523.958	2550343.58	2378032.198	2654304.492
D3ZI16	Cops6	COP9 (Constitutive photomorphogenic) homolog, subunit 6 (Arabidopsis thaliana) (Predicted), isoform CRA_a OS=Rattus norvegicus OX=10116 GN=Cops6 PE=1 SV=1	16	4	17	4	1	344	37.7	6.14	44.77	4	0	1398923.411	1680930.977	674193.0387	1339892.459	3991952.926	1672142.996	2017016.166	3465720.905	4108991.551	1347932.851	2309894.62	2422592.619
D3ZI42	Lrsam1	Leucine-rich repeat and sterile alpha motif-containing 1 OS=Rattus norvegicus OX=10116 GN=Lrsam1 PE=1 SV=3	2	1	2	1	1	728	84	6.3	5.2	1	0	121788.161	114428.375	NA	NA	131994.5284	NA	NA	NA	289770.1155	253979.3591	135671.1341	252432.5201
D3ZI66	Rnf149	Ring finger protein 149 OS=Rattus norvegicus OX=10116 GN=Rnf149 PE=1 SV=1	3	1	1	1	1	394	42.6	6.68	2.19	1	0	NA	NA	NA	NA	NA	NA	NA	NA	NA	NA	NA	NA
D3ZIA7	Agr2	Anterior gradient 2 (Xenopus laevis) (Predicted), isoform CRA_a OS=Rattus norvegicus OX=10116 GN=Agr2 PE=4 SV=1	22	3	22	3	1	175	19.9	9.01	49.55	3	0	8312810.477	7853209	10439339.24	10533493.14	6491927.546	7765788.184	6519936.617	342430.3035	6728376.084	4311347.104	4462539.653	6003001.578
D3ZIC2	Uroc1	Urocanate hydratase 1 OS=Rattus norvegicus OX=10116 GN=Uroc1 PE=1 SV=2	14	7	10	7	1	676	74.6	7.02	25.97	7	0	17039.12583	NA	225580.783	389049.2867	29659.91799	149065.0579	NA	26966026.36	58364.8514	NA	NA	NA
D3ZIC4	Ppp1r12b	Protein phosphatase 1, regulatory (Inhibitor) subunit 12B (Predicted) OS=Rattus norvegicus OX=10116 GN=Ppp1r12b PE=1 SV=1	4	3	24	3	1	993	111.3	5.62	53.94	3	0	1018502.05	961130.6563	739747.503	1082644.391	710010.9479	1142010.982	2642661.809	77254.81976	876573.9193	917611.8356	739735.5382	1242197.287
D3ZIE9	Aldh18a1	Delta-1-pyrroline-5-carboxylate synthase OS=Rattus norvegicus OX=10116 GN=Aldh18a1 PE=3 SV=1	19	11	71	11	1	795	87.3	7.56	169.57	11	0	4013917.97	6753405.273	11386360.44	7497651.167	8433747.238	9193317.303	7462701.538	119823.1271	7101961.932	14624458.42	16732065.77	8615045.707
D3ZIF6	LOC100360095	Urinary protein 1-like OS=Rattus norvegicus OX=10116 GN=LOC100360095 PE=1 SV=1	44	2	2	2	1	100	10.6	7.53	6.4	2	0	96566.03064	311423.6914	1437259.085	739365.4243	235875.0599	952842.684	NA	1125055.641	98256.42952	NA	NA	NA
D3ZII8	Smyd5	SET and MYND domain containing 5 (Predicted) OS=Rattus norvegicus OX=10116 GN=Smyd5 PE=1 SV=2	3	1	1	1	1	417	47	5.05	2.45	1	0	88468.44434	194098.0625	NA	NA	199685.6486	77722.14342	295004.6243	386533.4125	282877.2978	290628.4734	205460.1797	193509.7641
D3ZIJ5	Dpm3	Dolichyl-phosphate mannosyltransferase subunit 3 OS=Rattus norvegicus OX=10116 GN=Dpm3 PE=1 SV=1	24	2	7	2	1	92	10.1	7.08	15.24	2	0	5941089.514	5669641.188	12377328.15	8637319.821	5116274.433	6833394.139	15482275.76	7832558.362	12834260.7	5511442.575	4896026.548	12191889.54
D3ZIK0	Glce	Glucuronic acid epimerase OS=Rattus norvegicus OX=10116 GN=Glce PE=4 SV=1	2	1	1	1	1	618	70.1	8.91	2.25	1	0	76671.93419	134899.0469	29812.51459	54800.79344	220059.3237	67277.0939	139189.4426	NA	150549.9977	130912.7495	227791.6775	NA
D3ZIL6	Echdc2	Enoyl CoA hydratase domain-containing 2 OS=Rattus norvegicus OX=10116 GN=Echdc2 PE=1 SV=1	21	5	51	5	1	296	31.8	9.33	139.75	5	0	5565526.259	10764019.47	11186174.75	13083852.74	11158613.3	5313312.888	5685577.262	17974310.32	3638404.207	7238922.468	5220308.025	5299388.822
D3ZIM7	Fam177a1	Family with sequence similarity 177, member A1 OS=Rattus norvegicus OX=10116 GN=Fam177a1 PE=1 SV=1	21	3	9	3	1	208	23.6	4.55	17.4	3	0	1618136.299	1595486.75	1455094.761	979669.2761	594716.6121	1412347.369	1592396.22	468398.1824	2357839.073	1380091.287	1385225.782	844775.3137
D3ZIN7	Mrps23	Mitochondrial ribosomal protein S23 OS=Rattus norvegicus OX=10116 GN=Mrps23 PE=1 SV=1	8	1	1	1	1	177	20.3	9.25	2.44	1	0	NA	NA	NA	NA	NA	NA	NA	NA	NA	NA	NA	NA
D3ZIP2	Cd180	CD180 antigen (Predicted), isoform CRA_a OS=Rattus norvegicus OX=10116 GN=Cd180 PE=1 SV=1	18	7	15	7	1	662	74.3	6.37	30.42	7	0	226193.1768	198048.8486	160572.3895	485260.9417	1310835.121	95062.62795	835605.5538	827049.637	1760248.132	2431995.428	3312094.654	3081917.883
D3ZIP8	Endod1	Uncharacterized protein OS=Rattus norvegicus OX=10116 PE=4 SV=2	27	7	48	7	1	347	38.1	8.05	125.2	7	0	13093957.05	14256015.73	11569539.77	8846982.131	15134714.68	14654672.41	7148767.573	225345.9348	16074294.8	15870682.79	19489356.45	21953620.01
D3ZIQ1	Acot4	Acyl-CoA thioesterase 4 OS=Rattus norvegicus OX=10116 GN=Acot4 PE=1 SV=1	8	3	11	1	1	421	46.3	7.62	22.4	3	0	NA	NA	NA	NA	NA	NA	NA	1041798.241	NA	NA	NA	NA
D3ZIT1	Olr170	Olfactory receptor 170 OS=Rattus norvegicus OX=10116 GN=Olr170 PE=3 SV=1	10	1	1	1	1	321	36	8.57	0	1	0	NA	NA	NA	NA	NA	NA	NA	NA	NA	NA	NA	NA
D3ZIY3	Ythdf3	YTH N(6)-methyladenosine RNA-binding protein 3 OS=Rattus norvegicus OX=10116 GN=Ythdf3 PE=1 SV=1	6	3	25	2	1	585	63.9	9.04	43.74	3	1	3867472.65	2081167.969	2523160.094	2494537.982	2609747.256	2280021.688	2859282.574	2595980.874	2329189.91	1295228.991	2863152.196	3192183.754
D3ZJ01	RGD1307235	RAB11-binding and LisH domain, coiled-coil and HEAT repeat-containing OS=Rattus norvegicus OX=10116 GN=Relch PE=1 SV=1	1	1	2	1	1	1218	134.6	5.3	4.6	1	0	NA	20112.58203	NA	NA	29859.78097	NA	274836.2563	45680.45137	16416.31671	84232.19335	NA	3384479.312
D3ZJ08	Hist2h3c2	Histone H3 OS=Rattus norvegicus OX=10116 GN=Hist2h3c2 PE=1 SV=1	15	3	27	3	1	136	15.4	11.27	46.94	3	0	12592880.38	65141994.75	17949546.68	35334740.59	24491180.79	91946835.23	13173054.04	23908224.44	12460791.29	84583606.72	55908604.02	10146302.6
D3ZJ25	Slc1a5	Amino acid transporter OS=Rattus norvegicus OX=10116 GN=Slc1a5 PE=1 SV=3	3	1	3	1	1	554	58.2	7.66	9.52	1	0	703871.5706	527652.3125	578069.1874	859877.5843	1032026.776	390942.1062	1467280.478	NA	NA	760502.7594	733200.4074	1569055.272
D3ZJ32	Esyt2	Extended synaptotagmin 2 OS=Rattus norvegicus OX=10116 GN=Esyt2 PE=1 SV=3	37	22	246	22	1	845	93.9	8.24	540.03	22	0	130241169.1	150928100.9	92755141.2	113152242.1	83227716.08	105426068.7	117190356.6	14693462.37	94995539.58	42142332.45	77103328.76	79391670.96
D3ZJ62	Ropn1l	Rhophilin-associated tail protein 1-like OS=Rattus norvegicus OX=10116 GN=Ropn1l PE=4 SV=1	7	1	3	1	1	218	24.3	5.68	7.24	1	0	NA	NA	NA	NA	NA	NA	NA	NA	NA	NA	NA	NA
D3ZJ86	Slc9a6	Sodium/hydrogen exchanger OS=Rattus norvegicus OX=10116 GN=Slc9a6 PE=1 SV=2	5	3	28	3	1	721	79.8	6.11	58.12	3	0	2986660.313	3246527.469	2341762.189	1746999.13	3175031.256	1650054.679	1605196.867	341797.4276	3167647.037	3118765.858	3930585.793	2485899.288
D3ZJ91	Ddhd2	DDHD domain-containing 2 OS=Rattus norvegicus OX=10116 GN=Ddhd2 PE=1 SV=2	1	1	2	1	1	699	79.5	5.27	3.94	1	0	NA	177877.1406	216665.3694	103896.8752	301878.3989	135316.3045	591407.5177	211684.1524	935013.4417	379120.1444	NA	929679.9033
D3ZJA9	Slc27a3	Solute carrier family 27 (Fatty acid transporter), member 3 (Predicted) OS=Rattus norvegicus OX=10116 GN=Slc27a3 PE=4 SV=1	3	1	3	1	1	667	72.4	7.28	7.6	1	0	NA	NA	NA	NA	NA	NA	NA	NA	NA	NA	NA	NA
D3ZJB1	Mfap5	Microfibril-associated protein 5 OS=Rattus norvegicus OX=10116 GN=Mfap5 PE=4 SV=1	14	2	26	2	1	166	18.7	5.94	71	2	0	4027848.947	7545162.188	5770205.196	16717667.57	7102979.208	6553705.783	5444332.223	3012078.785	4457581.193	17991637.34	9334163.339	5241648.831
D3ZJB8	Arih2	RBR-type E3 ubiquitin transferase OS=Rattus norvegicus OX=10116 GN=Arih2 PE=1 SV=1	9	3	7	3	1	492	57.7	5.76	17.06	3	0	NA	60731.24219	NA	28904.56584	454941.1626	268701.4591	1290237.142	597872.9669	1274690.394	154846.2827	578406.4464	786160.409
D3ZJF8	Fcgbp	Fc fragment of IgG-binding protein OS=Rattus norvegicus OX=10116 GN=Fcgbp PE=1 SV=3	0	1	4	1	1	2584	275	5.08	7.29	1	0	2020590.572	4039711	2006468.873	2808279.653	1382524.201	24301146.86	2019405.247	8935565.574	8554912.806	14489801.94	18430876.31	5401461.253
D3ZJF9	Gla	Alpha-galactosidase OS=Rattus norvegicus OX=10116 GN=Gla PE=1 SV=2	23	8	47	8	1	420	47.5	5.72	106.4	8	0	7631424.633	10502162.47	8450677.061	11584846.03	9567939.123	10236786.46	3483818.215	10017954.89	1998825.736	7844648.78	8719547.226	4683505.701
D3ZJK6	Trappc9	Trafficking protein particle complex 9 OS=Rattus norvegicus OX=10116 GN=Trappc9 PE=1 SV=2	8	5	21	3	1	857	95.3	6.96	53.37	5	2	2161532.058	1871714.984	1590472.293	1294310.607	2370438.555	1788006.69	1315675.661	440467.3833	2364682.667	1620513.439	1995797.225	2991542.512
D3ZJK8	Atp8a1	Uncharacterized protein OS=Rattus norvegicus OX=10116 PE=1 SV=3	28	3	38	3	1	106	12.1	6.02	51.35	3	0	11125120.14	16907600.56	28065046.65	13403072.25	15965658.67	17910213.68	5797851.524	1455680.687	6455986.978	7027164.946	14434942.16	9601050.662
D3ZJN9	Evi5	Ecotropic viral integration site 5 OS=Rattus norvegicus OX=10116 GN=Evi5 PE=1 SV=3	1	1	1	1	1	809	92.8	6.1	2.53	1	0	NA	NA	NA	286039.0351	NA	NA	558324.299	994317.2465	682362.6584	NA	NA	565398.2764
D3ZJP6	Myo10	Unconventional myosin-X OS=Rattus norvegicus OX=10116 GN=Myo10 PE=1 SV=1	1	2	4	2	1	2060	237.1	6.3	9.88	2	0	650932.7769	1009635.891	591675.9531	893457.6335	826299.9279	959697.992	515830.7776	496191.2904	697344.8077	477518.3038	130111.9156	173385.3581
D3ZJR1	Eps15l1	Epidermal growth factor receptor pathway substrate 15-like 1 OS=Rattus norvegicus OX=10116 GN=Eps15l1 PE=1 SV=3	24	19	130	19	1	909	99.4	5.02	313.1	19	0	27485145.79	26202704.25	21897876.42	27561570.85	29572730.57	26102874.68	32387835.84	7219508.571	24419655.3	20849802.27	25417502.06	26824529.77
D3ZJR7	Dsc2	Desmocollin 2 OS=Rattus norvegicus OX=10116 GN=Dsc2 PE=1 SV=3	1	1	1	1	1	902	100	5.06	2.57	1	0	NA	NA	NA	NA	NA	NA	NA	NA	NA	NA	NA	NA
D3ZJW6	#N/A	RCG21066 OS=Rattus norvegicus OX=10116 GN=rCG_21066 PE=1 SV=1	9	1	13	1	1	117	13.1	8.94	31.1	1	0	4661241.274	NA	NA	NA	NA	NA	9606177.653	570609.2409	2819144.157	5688431.854	NA	2835037.87
D3ZJX5	Timm50	RCG54610, isoform CRA_a OS=Rattus norvegicus OX=10116 GN=Timm50 PE=1 SV=2	28	7	106	7	1	353	39.8	8.13	297.91	7	0	12392336.61	21991606.91	30164631.89	25845776.67	23307135.93	20645429.85	9463924.308	14620414.99	6620297.774	17122588.11	30877695.44	14339868.21
D3ZJZ0	Tmem205	RGD1563250 (Predicted), isoform CRA_a OS=Rattus norvegicus OX=10116 GN=Tmem205 PE=1 SV=1	27	4	50	4	1	189	21.2	8.6	129.1	4	0	15203355.62	13628664.79	16970874.77	13631404.13	19207416.27	16074534.74	4280065.886	142881325.7	8105000.108	8818083.753	12577652.36	12985211.64
D3ZK56	Rap2c	RAP2C, member of RAS oncogene family OS=Rattus norvegicus OX=10116 GN=Rap2c PE=1 SV=2	16	3	29	1	1	183	20.7	4.94	49.78	3	0	3167890.867	3373990	948911.5223	1368935.183	3180212.458	1305759.455	1251838.41	904560.7954	2665601.062	1491555.83	2968590.071	1628068.587
[truncated: 4,126 more rows]
