# Supplementary material for: Identifying Potential Mitochondrial Proteome Signatures Associated with the Pathogenesis of Pulmonary Arterial Hypertension in the Rat Model
Source: Oxid Med Cell Longev. 2022 Feb 21;2022:8401924. doi: 10.1155/2022/8401924 (PMC8885180; doi:10.1155/2022/8401924)
Supplement: Supplementary Materials — Supplementary Table S1: the label-free quantitative analysis of the mitochondrial proteome in the rat model. Supplementary Table S2: the significant mitochondrial DEPs in the PAH rat model when compared with control. Supplementary Table S3: identification of upregulated mitochondrial genes based on functional enrichment of the PPI network. Supplementary Table S4: identification of downregulated mitochondrial genes based on functional enrichment of the PPI network. Supplementary Figure S1: the visualization of the PPI network with upregulated mitochondrial DEPs. Supplementary Figure S2: the visualization of the PPI network with downregulated mitochondrial DEPs. [file 8401924.f1.zip › Supplementary Table S2.txt]

Supplementary Table S2. The result of signicicant DEPs in PAH rat model when compared with control
Accession	Description	Coverage [%]	# Peptides	# PSMs	# Unique Peptides	# Protein Groups	# AAs	MW [kDa]	calc. pI	Score Sequest HT: Sequest HT	# Peptides (by Search Engine): Sequest HT	# Razor Peptides	97	101	112	114	99	102	46	35	19	32	57	45	Group_Model.average	Group_Normal.average	Group_Model.call.percent	Group_Normal.call.percent	Group_Model.vs.Group_Normal.FC	LogFC	pvalue	LogP
A0A0G2JTY2	Hexokinase-3 OS=Rattus norvegicus OX=10116 GN=Hk3 PE=1 SV=1	6	4	9	3	1	963	104.5	5.58	21.31	4	0	NA	NA	NA	48450.06621	69332.87987	NA	1050233.243	NA	2085209.678	1792472.444	NA	911562.2715	1459869.409	58891.47304	0.666666667	0.333333333	24.78914745	1.394261591	0.030371915	1.517527824
A0A0G2JSM0	DnaJ (Hsp40) homolog, subfamily C, member 2 OS=Rattus norvegicus OX=10116 GN=Dnajc2 PE=1 SV=1	4	2	2	2	1	621	71.8	8.85	4.39	2	0	9935.852132	26253.82617	9313.612179	11736.65385	39223.86957	8159.245621	660026.3379	158112.9893	463298.4632	NA	NA	NA	427145.9301	17437.17659	0.5	1	24.49627828	1.389100107	0.003687182	2.433305425
Q64350	Translation initiation factor eIF-2B subunit epsilon OS=Rattus norvegicus OX=10116 GN=Eif2b5 PE=1 SV=2	19	8	25	8	1	716	80.2	5.02	52.73	8	0	126323.3609	221454.3906	118311.4803	122305.6541	465063.2532	22540.20076	3914915.768	1287073.433	4403458.063	908971.8284	2263747.303	5953875.111	3122006.918	179333.0567	1	1	17.40898737	1.24077351	0.004400239	2.356523734
Q9JJW1	Tetraspanin-2 OS=Rattus norvegicus OX=10116 GN=Tspan2 PE=1 SV=1	12	2	18	2	1	221	24.2	7.96	55.88	2	0	99662.22062	168970	80491.34451	NA	170359.2342	57929.0615	NA	NA	93202.41997	NA	2000549.544	2832051.777	1641934.58	115482.3722	0.5	0.833333333	14.2180538	1.152840153	0.042067274	1.37605563
A0A097PE04	Cytochrome c oxidase subunit 2 OS=Rattus norvegicus OX=10116 GN=COX2 PE=3 SV=1	23	4	90	1	1	227	25.9	4.73	172.11	4	0	36551.40297	398942.1875	76321.73195	95911.60565	798112.5961	50761.08977	2973068.361	3138388.171	112719.7797	9476899.507	3383632.404	1289525.639	3395705.644	242766.769	1	1	13.9875225	1.145740798	0.038987378	1.409075971
P00770	Mast cell protease 2 OS=Rattus norvegicus OX=10116 GN=Mcpt2 PE=1 SV=1	29	6	72	6	1	247	27.1	8.03	169.04	6	0	466203.2542	2446141.906	123619.6346	601122.6508	773440.4326	4049340.408	14064392.21	2478061.248	23189943.1	50737540.54	18070767.68	8178220.574	19453154.22	1409978.048	1	1	13.79677808	1.139777679	0.026727947	1.573034399
F1LWS4	Uncharacterized protein OS=Rattus norvegicus OX=10116 GN=Cfhr2 PE=1 SV=3	16	7	22	6	1	574	65.8	6.55	47.41	7	0	408809.357	225647.125	NA	NA	394245.9681	261248.1614	3988038.649	1059903.99	4905944.959	4617651.759	3164835.344	8251047.113	4331236.969	322487.6529	1	0.666666667	13.43070636	1.128098854	0.010531038	1.97752882
B2GV97	O-phosphoseryl-tRNA(Sec) selenium transferase OS=Rattus norvegicus OX=10116 GN=Sepsecs PE=1 SV=1	14	5	5	5	1	504	55.3	7.81	13.11	5	0	158654.0141	315397.6719	162440.8795	201135.7022	129949.9739	NA	1125331.704	5654025.96	1108043.656	1777184.636	1956826.96	2004612.893	2271004.301	193515.6483	1	0.833333333	11.73550729	1.069501868	0.024440824	1.611884156
D4AE03	Endo-beta-N-acetylglucosaminidase OS=Rattus norvegicus OX=10116 GN=Engase PE=1 SV=1	4	3	5	3	1	732	83	6.79	10.48	3	0	84501.74312	89419.125	55772.85405	117524.6835	213986.1468	133382.7919	NA	604683.0667	728531.265	368595.0158	3239423.006	1394047.143	1267055.899	115764.5574	0.833333333	1	10.94511073	1.03922016	0.037267851	1.42866565
J7JVB9	Mx2 OS=Rattus norvegicus OX=10116 PE=2 SV=1	4	2	5	2	1	659	75.2	5.49	6.85	2	0	93976.28431	78469.92969	100516.1324	76588.47696	82546.2613	46871.59163	528011.1031	613148.6475	1087488.9	1096555.146	728457.5256	1159193.574	868809.1493	79828.11271	1	1	10.88349855	1.036768524	3.96E-05	4.402304814
F1M7F7	Complement component C6 OS=Rattus norvegicus OX=10116 GN=C6 PE=1 SV=3	20	13	24	13	1	931	104.3	6.65	56.98	13	0	947508.0541	206043.0977	945503.525	1236156.144	292302.0515	157349.6844	3234115.129	1819760.539	10763022.45	11373363.09	7312972.99	6357877.761	6810185.327	630810.4261	1	1	10.7959302	1.033260068	0.003007014	2.52186455
P14272	Plasma kallikrein OS=Rattus norvegicus OX=10116 GN=Klkb1 PE=1 SV=1	21	9	25	9	1	638	71.2	8.07	63.97	9	0	919711.9681	416556.4844	932358.8863	89119.84053	412912.4547	144089.4946	5518690.762	1666952.616	8805815.472	4106739.546	2991580.613	7587338.134	5112852.857	485791.5214	1	1	10.52478817	1.022213364	0.002103413	2.677075446
A0A0G2K8Q1	Apolipoprotein C-III OS=Rattus norvegicus OX=10116 GN=Apoc3 PE=1 SV=1	19	1	31	1	1	100	11	4.77	95.21	1	0	2110081.989	2152939.375	813006.34	563988.8992	NA	370311.4966	16154648.71	5894128.584	3435900.244	9636078.349	10802346.75	27553220.59	12246053.87	1202065.62	1	0.833333333	10.18750863	1.00806799	0.020411364	1.690127972
P08932	T-kininogen 2 OS=Rattus norvegicus OX=10116 PE=1 SV=2	53	20	218	6	1	430	47.7	6.35	574.31	20	15	30194327.59	17718841.59	15057540.11	19266011.88	15784044.19	15595372.4	103389206.2	179234183.7	437768301	217915372.5	139724258.9	46990523.92	187503641	18936022.96	1	1	9.901954673	0.995720934	0.012691858	1.896474796
A0A0G2K8A9	Uncharacterized protein OS=Rattus norvegicus OX=10116 PE=1 SV=1	6	1	6	1	1	213	23.8	4.56	6.27	1	0	51112.3823	77965.71875	20559.448	36791.8424	NA	16739.60212	530496.8809	759026.3287	130469.3064	138101.0623	361414.7092	422617.8173	390354.3508	40633.79871	1	0.833333333	9.606641839	0.982571599	0.010636271	1.973210606
B2GUV9	Exocyst complex component 3-like 4 OS=Rattus norvegicus OX=10116 GN=Exoc3l4 PE=1 SV=1	6	3	4	3	1	721	81	6.42	9.97	3	0	123997.3193	218908.75	217436.7564	682498.7986	818675.6875	1094215.074	334173.2642	NA	NA	NA	5993071.832	8812106.052	5046450.383	525955.3977	0.5	1	9.594825731	0.982037091	0.02885738	1.539743102
Q62975	Protein Z-dependent protease inhibitor OS=Rattus norvegicus OX=10116 GN=Serpina10 PE=2 SV=2	11	4	21	4	1	436	50.2	6.81	47.62	4	0	675760.8865	681401.5313	132748.4655	153411.6332	869890.35	470466.3637	1830159.188	5889844.86	2738506.656	4319019.893	5432388.826	6474868.53	4447464.659	497279.8717	1	1	8.943584714	0.951511625	0.000409415	3.38783625
B1WC80	Uncharacterized protein RGD1563692_predicted OS=Rattus norvegicus OX=10116 GN=Mab21l4 PE=2 SV=1	4	2	5	2	1	452	50.4	6.52	11.59	2	0	64681.26146	200508.5938	35411.95949	65088.15529	163304.2278	181710.1385	952717.7434	NA	908701.8452	1183874.92	1351558.097	554147.3429	990199.9897	118450.7227	0.833333333	1	8.359594327	0.922185203	7.06E-05	4.151195299
Q5M890	Apolipoprotein N OS=Rattus norvegicus OX=10116 GN=Apon PE=1 SV=1	21	4	41	4	1	255	28.2	5.3	91.31	4	0	572383.2521	385849.9375	293570.3507	251248.9044	396131.8969	212212.3293	2341689.911	1053520.218	1940975.406	4590656.869	2435240.602	4979458.082	2890256.848	351899.4452	1	1	8.213303226	0.914517857	0.002546995	2.593971908
Q5M852	Leupaxin OS=Rattus norvegicus OX=10116 GN=Lpxn PE=1 SV=1	10	3	5	3	1	386	43.3	6.61	11.52	3	0	565574.5677	NA	286441.4816	703733.4693	487331.7988	246032.4617	4718341.031	634884.9679	5499870.309	4480696.205	3264894.222	3829226.62	3737985.559	457822.7558	1	0.833333333	8.164700228	0.911940244	0.002144433	2.668687518
P55314	Complement component C8 beta chain OS=Rattus norvegicus OX=10116 GN=C8b PE=2 SV=2	28	13	69	13	1	589	66.6	8.05	177.44	13	0	1626537.615	2544712.363	1298951.128	1531436.829	3481313.482	2011885.764	9159509.642	7187968.218	18140612.62	31001460.23	20921600.97	14512594.77	16820624.41	2082472.863	1	1	8.077235821	0.907262763	0.002004331	2.698030556
F1LQT4	Carboxypeptidase N subunit 2 OS=Rattus norvegicus OX=10116 GN=Cpn2 PE=1 SV=1	5	3	13	3	1	565	62.6	6.33	12.77	3	0	277612.2824	548413.0781	NA	NA	275502.6252	305904.4304	2980413.328	2433190.675	3067209.083	2609052.726	2713990.098	3203988.808	2834640.786	351858.104	1	0.666666667	8.056204345	0.906130474	2.94E-07	6.53165267
D3ZFH5	Inter-alpha-trypsin inhibitor heavy chain 2 OS=Rattus norvegicus OX=10116 GN=Itih2 PE=1 SV=3	15	9	99	9	1	826	92.3	6.7	228.45	9	0	3817279.376	4589799.469	3455023.335	3923046.686	5630523.075	3348976.724	28734408.52	20497050.37	28691646.3	27911170.63	56352834.18	31758190.94	32324216.82	4127441.444	1	1	7.831538559	0.893847091	0.000235013	3.628908114
A0A0G2K916	Eukaryotic translation initiation factor 4E-binding protein 3 OS=Rattus norvegicus OX=10116 GN=Ankhd1 PE=1 SV=1	5	8	18	3	1	2615	276.7	6.05	46.36	8	2	1163910.114	1229994.117	699675.6477	426389.5704	900493.1123	598909.9516	6532468.058	1761485.633	6030204.223	8262606.222	4899069.677	11280642.38	6461079.365	836562.0855	1	1	7.723371017	0.887806898	0.001599995	2.795881375
A0A0G2JVW3	Ankyrin repeat domain 17 OS=Rattus norvegicus OX=10116 GN=Ankrd17 PE=1 SV=1	4	7	18	2	1	2524	267.1	6.55	46	7	0	119637.8272	93976.78125	75053.50324	65058.68885	147673.5298	63624.02803	1455517.093	552435.0405	271062.2224	403764.4316	1186341.317	484687.7508	725634.6425	94170.7264	1	1	7.705522408	0.886802088	0.009071027	2.04234354
P62282	40S ribosomal protein S11 OS=Rattus norvegicus OX=10116 GN=Rps11 PE=1 SV=3	47	9	99	1	1	158	18.4	10.3	206.88	9	0	2344784.564	1968620.625	183338.0927	NA	3230373.489	114742.4723	11112591.74	28651428.76	8551938.155	331588.1851	11477457.51	11781175.02	11984363.23	1568371.849	1	0.833333333	7.641276677	0.883165925	0.035154892	1.454014232
Q7TMA5	Apolipoprotein B-100 OS=Rattus norvegicus OX=10116 GN=Apob PE=1 SV=1	15	58	131	58	1	4743	535.7	7.42	291.04	58	0	6321650.162	7826572.916	9482989.716	6075542.4	9579044.6	5865001.003	30742316.96	166320982.3	53000267.07	30884524.64	31063468.96	31451831.36	57243898.54	7525133.466	1	1	7.607027676	0.881214996	0.048364607	1.315472337
Q7TP61	Ab2-076 OS=Rattus norvegicus OX=10116 PE=2 SV=1	9	4	8	4	1	963	103.2	6.54	22.05	4	0	45933.34896	242908.7188	NA	23455.16498	161715.916	NA	774852.9521	2110834.288	976908.9672	574429.7983	528681.0328	435979.4612	900281.0833	118503.2872	1	0.666666667	7.597097976	0.880647727	0.040859338	1.388708674
G3V7N4	Tyrosine-protein kinase OS=Rattus norvegicus OX=10116 GN=Syk PE=1 SV=1	10	5	16	5	1	629	71.4	8.03	38.85	5	0	1197912.414	623408.9375	330283.4545	1106227.797	478527.0174	74737.04418	5348037.518	680400.3297	7277741.107	3272314.399	5731908.816	6425371.837	4789295.668	635182.7773	1	1	7.540027594	0.877372935	0.002016121	2.695483407
B5DEX3	Copine 8 OS=Rattus norvegicus OX=10116 GN=Cpne8 PE=1 SV=1	5	2	18	1	1	577	64.6	5.97	32.3	2	0	130633.3784	164065.0313	69650.35409	78015.29479	126532.692	61802.04312	1021896.755	241755.4473	1388643.097	398715.8965	472771.4973	1057409.245	763531.9897	105116.4656	1	1	7.263676392	0.861156487	0.005424182	2.265665747
Q68FQ7	RNA polymerase II-associated protein 3 OS=Rattus norvegicus OX=10116 GN=Rpap3 PE=1 SV=1	9	4	4	4	1	659	74.6	7.99	9.52	4	0	NA	179049.3828	71771.38192	87999.08409	198414.201	NA	1180319.325	NA	706585.3805	1031490.454	NA	893963.416	953089.6439	134308.5124	0.666666667	0.666666667	7.096271312	0.851030212	0.00024389	3.612806006
P01048	T-kininogen 1 OS=Rattus norvegicus OX=10116 GN=Map1 PE=1 SV=2	45	17	205	5	1	430	47.7	6.52	521.61	17	0	13567737.3	8260728.07	9617868.557	10134254.3	6226044.595	8771269.585	37211152.08	74969707.97	152606333.2	68848893.38	53706800.97	14069806.95	66902115.76	9429650.4	1	1	7.094867033	0.850944261	0.014226969	1.846887615
D3ZPI8	Complement C8 gamma chain OS=Rattus norvegicus OX=10116 GN=C8g PE=1 SV=1	49	6	35	6	1	164	18.4	8.32	66.71	6	0	1019306.709	2264963.375	452952.1968	649601.1768	2823076.369	816458.3416	17812794.9	2421890.453	7436444.126	12946498.48	10125679.19	5293281.038	9339431.365	1337726.361	1	1	6.981570847	0.843953149	0.005851718	2.232716611
A0A0G2K9B1	Serine protease inhibitor A3N OS=Rattus norvegicus OX=10116 GN=LOC299282 PE=1 SV=1	41	18	226	18	1	432	48.3	5.57	568.27	18	0	33553633.37	39168547.06	16308066.17	8283080.675	38682625.23	12821396.78	86772050.19	115438830.1	163764285.6	365225687.4	168527370.5	85681269.26	164234915.5	24802891.55	1	1	6.621603582	0.820963177	0.009033581	2.044140057
Q5EBC0	Inter alpha-trypsin inhibitor, heavy chain 4 OS=Rattus norvegicus OX=10116 GN=Itih4 PE=1 SV=1	37	30	422	30	1	933	103.7	6.2	974.16	30	0	36347530.96	26193368.07	28201184.74	27653053.69	31939920.36	26195856.54	161802976.8	169952483.9	236184203.9	215808260.4	200855025.5	159487443.6	190681732.4	29421819.06	1	1	6.480963395	0.811639569	2.24E-07	6.649751982
Q03626	Murinoglobulin-1 OS=Rattus norvegicus OX=10116 GN=Mug1 PE=2 SV=1	36	44	953	2	1	1487	165.2	6.01	2594.95	44	1	336575.0362	2116553.375	1416815.568	526215.8955	2605501.012	1213514.654	6417864.659	632546.421	2697323.727	16371637.19	17306260.27	9590550.907	8836030.529	1369195.923	1	1	6.453444958	0.80979161	0.025634116	1.591181655
A0A0G2K4Y7	Unconventional myosin-Va OS=Rattus norvegicus OX=10116 GN=Myo5a PE=1 SV=1	5	7	40	3	1	1828	212	8.59	78.79	7	0	625736.3128	22513.82617	466933.4756	329450.8369	393506.2134	NA	2249420.682	288991.4368	3635937.74	2200917.55	3551097.371	2174536.81	2350150.265	367628.133	1	0.833333333	6.392737809	0.805686893	0.006102983	2.21445784
D3ZWD6	Complement C8 alpha chain OS=Rattus norvegicus OX=10116 GN=C8a PE=1 SV=1	19	10	55	10	1	587	66.2	5.96	137.41	10	0	1923041.593	3017102.844	703433.6305	2948322.702	4102007.728	4091135.69	6682618.766	13160238.38	16236103.18	38547721.21	22985248.83	8593297.253	17700871.27	2797507.365	1	1	6.327372536	0.801223405	0.011459388	1.940838576
A0A0H2UI19	Coagulation factor XII OS=Rattus norvegicus OX=10116 GN=F12 PE=1 SV=1	17	8	59	8	1	603	66.7	7.3	139.41	8	0	5556282.493	4068795.172	722360.2698	2778504.047	3800175.369	3712629.084	23579482.82	9633902.531	30552140.8	18537083.98	24910849.94	23324632.15	21756348.7	3439791.073	1	1	6.324904113	0.801053946	0.000103804	3.983785911
D3ZP96	DNA helicase OS=Rattus norvegicus OX=10116 GN=Mcm2 PE=1 SV=2	7	5	12	5	1	905	102.1	5.63	23.98	5	0	427326.2944	656536.6875	183045.7947	156151.187	253423.033	235745.2222	918714.7864	1218315.699	3530497.589	NA	2008828.016	2340769.056	2003425.029	318704.7031	0.833333333	1	6.286148305	0.798384623	0.003255605	2.487368293
F1LRE2	Insulin-like growth factor binding protein, acid labile subunit, isoform CRA_b OS=Rattus norvegicus OX=10116 GN=Igfals PE=1 SV=2	7	3	19	3	1	603	66.9	6.61	42.89	3	0	76935.39901	180510.5156	3854104.275	146558.7575	844181.3518	42445.99485	3169758.916	3924833.57	6299951.489	5759031.707	5687433.858	7473188.078	5385699.603	857456.0489	1	1	6.281021179	0.798030258	0.000466592	3.331062712
G3V915	Ribonuclease L OS=Rattus norvegicus OX=10116 GN=Rnasel PE=1 SV=1	1	1	11	1	1	738	83.2	6.44	19.31	1	0	61449.48327	84451.64063	29010.22694	50978.01813	80843.04683	22693.16751	701678.2232	102960.4406	335223.1073	163639.85	312275.4406	434157.7491	341655.8018	54904.26389	1	1	6.22275535	0.793982727	0.008466736	2.072283982
A0A0G2K320	Sialic acid-binding Ig-like lectin 1 OS=Rattus norvegicus OX=10116 GN=Siglec1 PE=1 SV=1	28	33	180	33	1	1693	182.5	6.7	460.97	33	0	5456993.843	6579894.984	10619659.68	12687499.25	7116537.448	6512053.596	26512699.41	24655942	51386196.28	61600359.18	82074381.17	50831689.29	49510211.22	8162106.467	1	1	6.065861971	0.782892524	0.000944548	3.024775967
Q7TP54	Rho family-interacting cell polarization regulator 2 OS=Rattus norvegicus OX=10116 GN=Ripor2 PE=1 SV=1	8	8	130	8	1	1310	144.6	5.47	379.87	8	0	4817396.455	5625748.531	980507.343	8895061.452	13025760.41	6096159.636	34812308.69	40850401.81	33588803.54	55661665.48	50174796.34	22216449.32	39550737.53	6573438.971	1	1	6.016749787	0.779361951	8.61E-05	4.064996849
B1H253	Proz protein (Fragment) OS=Rattus norvegicus OX=10116 GN=Proz PE=2 SV=1	10	3	5	3	1	410	45.8	5.54	10.51	3	0	20410.36586	124040.0078	NA	NA	NA	366332.4213	390824.0872	965496.3993	NA	873752.2707	1265707.197	1569088.945	1012973.78	170260.9317	0.833333333	0.5	5.949537395	0.774483199	0.021799479	1.661553886
B5DFG9	Pik3ap1 protein OS=Rattus norvegicus OX=10116 GN=Pik3ap1 PE=2 SV=1	2	1	1	1	1	812	91	5.2	1.8	1	0	50637.74449	96708.53906	NA	NA	147035.5917	NA	365741.6125	1121578.522	367207.2182	656047.3217	577456.6046	399482.1539	581252.2388	98127.29174	1	0.5	5.923451351	0.772574826	0.02790587	1.554304433
A0A0G2K8V5	C-reactive protein OS=Rattus norvegicus OX=10116 GN=Crp PE=1 SV=1	2	2	28	2	1	1017	116.4	9.25	55.17	2	0	3882946.905	2420914.5	2272223.809	3092213.98	4155520.865	2401229.153	26596157.6	20362718.35	15649138.81	15165506.93	14667460.19	14647674.69	17848109.43	3037508.202	1	1	5.875904933	0.769074761	2.19E-05	4.659555885
Q6AYJ8	Tumor necrosis factor alpha-induced protein 8-like protein 2 OS=Rattus norvegicus OX=10116 GN=Tnfaip8l2 PE=2 SV=1	15	2	9	2	1	184	20.7	7.59	17.95	2	0	314853.2423	42130.11719	280076.2542	NA	77942.27534	NA	409323.2022	91506.36734	1688441.587	1187316.096	1483879.533	1304718.163	1027530.825	178750.4722	1	0.666666667	5.748409007	0.759547661	0.032155275	1.492747772
D3ZZ95	60S ribosomal protein L36 OS=Rattus norvegicus OX=10116 PE=3 SV=1	28	3	40	3	1	106	12.4	11.66	87.33	3	0	12015078.95	3444036.125	2345411.376	3935671.623	5274169.135	3023339.179	18086441.84	65837746.11	27518121.98	3928873.183	27229931.06	24760838.98	27893658.86	5006284.398	1	1	5.57172878	0.745989968	0.023006717	1.63814535
A0A0G2JT33	Telomerase protein component 1 OS=Rattus norvegicus OX=10116 GN=Tep1 PE=1 SV=1	2	3	3	3	1	2641	292.8	7.66	8.1	3	0	48570.76321	26718.63086	62430.57621	464153.3232	NA	64596.38002	820862.5869	96731.44087	1048891.431	1104541.734	508276.7625	798793.3972	729682.8922	133293.9347	1	0.833333333	5.474239272	0.738323776	0.010517832	1.97807377
Q7TMC3	Aa2-028 OS=Rattus norvegicus OX=10116 GN=Saa4 PE=1 SV=1	4	3	10	3	1	830	92.8	5.43	23.42	3	0	776698.9947	787087	832356.3903	524677.348	341378.0617	411681.3711	2750678.748	2025201.343	3385847.689	5433415.661	2729240.216	3577399.252	3316963.818	612313.1943	1	1	5.417103288	0.733767116	0.000242705	3.614921277
P63322	Ras-related protein Ral-A OS=Rattus norvegicus OX=10116 GN=Rala PE=1 SV=1	33	7	74	4	1	206	23.5	7.11	165.76	7	0	1749548.421	1617230.5	73538.45049	67621.46428	1202760.582	529407.6992	6180641.511	1308287.566	6684921.901	2086329.811	4869336.878	7161459.602	4715162.878	873351.1862	1	1	5.398931097	0.732307785	0.004525046	2.344377002
P16296	Coagulation factor IX OS=Rattus norvegicus OX=10116 GN=F9 PE=2 SV=2	15	6	34	6	1	462	51.8	5.3	73.59	6	0	1675846.213	2765251.016	114292.1141	576090.6245	3341422.153	1204633.43	6342058.574	14408053.49	4336869.797	8078263.356	9765896.922	8149696.121	8513473.042	1612922.592	1	1	5.27828991	0.72249324	0.000934381	3.029476001
A0A0G2K3P6	Fc fragment of IgG receptor Ia OS=Rattus norvegicus OX=10116 GN=Fcgr1a PE=4 SV=1	13	4	16	4	1	362	40.8	7.46	30.43	4	0	1438177.407	1303074.203	393316.7055	521085.1999	1588059.157	844660.1309	2737542.18	2412251.415	6140462.628	7045167.64	8052766.694	5696146.683	5347389.54	1014728.801	1	1	5.269772117	0.721791835	0.00111729	2.951834088
F1LQE6	DNA-binding protein SMUBP-2 OS=Rattus norvegicus OX=10116 GN=Ighmbp2 PE=4 SV=2	4	2	3	2	1	1003	110	8.41	9.35	2	0	206649.4397	NA	26288.19687	26240.75976	25943.23639	NA	396887.2137	NA	NA	NA	NA	347452.9103	372170.062	71280.40817	0.333333333	0.666666667	5.221211151	0.717771257	0.01226921	1.9111834
D3ZQR7	Procollagen-lysine,2-oxoglutarate 5-dioxygenase 2 OS=Rattus norvegicus OX=10116 GN=Plod2 PE=4 SV=1	9	6	24	5	1	758	87	6.65	61.86	6	0	445638.1271	864489.0781	1151256.763	841754.7512	1487310.87	1144206.335	3017500.216	NA	5877292.412	7392524.295	6795994.884	2635918.118	5143845.985	989109.3206	0.833333333	1	5.200482776	0.716043662	0.001236947	2.907648908
F1M981	Phosphatidylinositol 3,4,5-trisphosphate 5-phosphatase 1 OS=Rattus norvegicus OX=10116 GN=Inpp5d PE=1 SV=2	6	5	27	5	1	1190	133.5	7.59	61.25	5	0	383550.1028	468376.0625	49557.09829	462002.9969	664052.9356	688712.8996	1582425.765	306588.5136	3607423.85	3606497.405	2475577.218	2530468.529	2351496.88	452708.6826	1	1	5.194282704	0.715525583	0.004667655	2.330901251
Q3KR94	Vitronectin OS=Rattus norvegicus OX=10116 GN=Vtn PE=1 SV=1	33	14	339	14	1	478	54.7	6.05	1004.74	14	0	51338348.41	19379401.3	21418269.16	18057457.85	23882370.74	10778540.42	137955974.4	38511674.01	71793800.78	98988375.31	132273223.3	271188261.8	125118551.6	24142397.98	1	1	5.182523778	0.714541303	0.012921475	1.888687908
P25236	Selenoprotein P OS=Rattus norvegicus OX=10116 GN=Selenop PE=1 SV=2	10	4	58	4	1	385	43.1	7.36	166.54	4	0	9120503.076	2376555.375	2564218.697	3300388.665	5707305.269	3466411.269	29693645.05	8714164.102	25214993.1	15843399.03	24952539.92	32738236.92	22859496.35	4422563.725	1	1	5.168833684	0.713392558	0.000691498	3.160209072
F1M7B8	Ubiquitin protein ligase E3A OS=Rattus norvegicus OX=10116 GN=Ube3a PE=1 SV=2	1	1	5	1	1	868	99.7	5.07	11.34	1	0	1533227.404	1719342.547	665027.5457	679282.5108	2456033.461	630516.925	2925300.222	5470950.967	3628713.168	10367759.8	9413982.139	7628963.599	6572611.65	1280571.732	1	1	5.132560312	0.710334061	0.002088189	2.680230196
Q5QE80	Aldehyde oxidase 3 OS=Rattus norvegicus OX=10116 GN=Aox3 PE=1 SV=1	14	13	49	13	1	1334	146.7	6.83	121.94	13	0	668278.9424	1532260.232	1586884.399	1162956.1	1777511.867	1575795.094	6193355.583	16587529.56	7995960.225	2479228.438	1555625.65	7686800.404	7083083.31	1383947.772	1	1	5.118027899	0.709102649	0.026797665	1.571903046
M0R5A9	Uncharacterized protein OS=Rattus norvegicus OX=10116 PE=1 SV=2	4	3	8	3	1	977	111.3	6.74	18.08	3	0	50624.79403	19930.11523	NA	NA	72279.94246	NA	328469.0218	246381.6971	121568.4416	NA	198826.5652	315830.292	242215.2035	47611.61724	0.833333333	0.5	5.087313088	0.706488466	0.009790032	2.009215889
Q9Z1Z9	PDZ and LIM domain protein 7 OS=Rattus norvegicus OX=10116 GN=Pdlim7 PE=1 SV=1	5	2	4	2	1	457	49.9	8.47	8.05	2	0	480181.3681	400181.4063	NA	312522.8285	190576.3884	185421.7785	1603039.759	NA	1849157.497	1572121.137	NA	1288473.965	1578198.089	313776.754	0.666666667	0.833333333	5.029684543	0.701540747	1.53E-05	4.815308569
P19944	60S acidic ribosomal protein P1 OS=Rattus norvegicus OX=10116 GN=Rplp1 PE=3 SV=1	52	2	65	2	1	114	11.5	4.32	183.89	2	0	6265811.19	6266719.125	4991670.135	4644633.206	8564228.02	1070918.469	54034958.9	29131639.37	14030421.47	15692377.35	16247752.75	30628556.79	26627617.77	5300663.358	1	1	5.023450081	0.701002091	0.006936009	2.158890352
D3ZIP2	CD180 antigen (Predicted), isoform CRA_a OS=Rattus norvegicus OX=10116 GN=Cd180 PE=1 SV=1	18	7	15	7	1	662	74.3	6.37	30.42	7	0	226193.1768	198048.8486	160572.3895	485260.9417	1310835.121	95062.62795	835605.5538	827049.637	1760248.132	2431995.428	3312094.654	3081917.883	2041485.215	412662.1843	1	1	4.947109991	0.694351566	0.006854647	2.164014906
F7F389	Complement component C9 OS=Rattus norvegicus OX=10116 GN=C9 PE=1 SV=1	34	17	110	17	1	580	65.2	6.1	244.03	17	0	10671492.86	14071748.09	11121765.86	9680174.42	13041135.5	11613250.72	43373982.3	30122978.89	64844847.83	102328598.5	66330766.35	38345312.44	57557747.72	11699927.91	1	1	4.919495928	0.691920605	0.001653352	2.781634675
P01015	Angiotensinogen OS=Rattus norvegicus OX=10116 GN=Agt PE=1 SV=1	13	5	6	5	1	477	51.9	5.57	9.65	5	0	685690.9012	357372.4141	728868.1499	1376527.916	377022.9673	772141.9034	3082886.262	6093828.222	984523.2247	4452806.648	3407081.414	3040001.432	3510187.867	716270.7087	1	1	4.900644162	0.690253169	0.002748923	2.560837425
P20761	Ig gamma-2B chain C region OS=Rattus norvegicus OX=10116 GN=Igh-1a PE=1 SV=1	31	8	252	8	1	333	36.5	7.64	691.9	8	0	33717744.21	25408779.82	31667568.45	33715311.85	17943022.72	28606288.82	349211250.1	22117680.5	78461599.01	168282940	131686354.7	80997324.36	138459524.8	28509785.98	1	1	4.856561353	0.68632888	0.041016933	1.387036817
M0R4H8	Proto-oncogene vav OS=Rattus norvegicus OX=10116 GN=Vav1 PE=1 SV=2	8	6	10	6	1	843	97.8	6.58	22.29	6	0	217938.2252	158271.7813	735655.7667	371095.7858	488105.7476	559057.8447	1270543.613	722703.0603	3647609.898	2022412.835	2333666.269	2228490.818	2037571.082	421687.5252	1	1	4.831945363	0.684122015	0.003182537	2.497226539
F1LZX5	HECT domain E3 ubiquitin protein ligase 4 OS=Rattus norvegicus OX=10116 GN=Hectd4 PE=1 SV=3	0	1	2	1	1	4126	452.2	6.18	5.01	1	0	NA	73022.67188	86589.74435	61776.376	NA	79855.57667	NA	NA	307733.0771	244242.2401	259915.9102	641034.6486	363231.469	75311.09222	0.666666667	0.666666667	4.823080615	0.683324521	0.021891272	1.659729003
Q5M963	Cytidine monophosphate N-acetylneuraminic acid synthetase OS=Rattus norvegicus OX=10116 GN=Cmas PE=1 SV=1	11	4	5	4	1	432	48.1	8.22	11.58	4	0	NA	128236.0156	85680.48146	199672.265	103259.601	421772.1779	480196.7749	1596294.837	1457261.153	744208.687	486733.5497	659417.1605	904018.6937	187724.1082	1	0.833333333	4.815677126	0.682657361	0.012479917	1.903788303
D4A777	Family with sequence similarity 114, member A1 OS=Rattus norvegicus OX=10116 GN=Fam114a1 PE=1 SV=2	3	2	3	2	1	567	60.7	4.65	4.92	2	0	56470.19589	118136.0469	NA	27055.46999	205004.0061	41307.35222	908103.6954	378070.8706	237697.3643	293728.8338	287671.4273	473642.8192	429819.1684	89594.61423	1	0.833333333	4.797377299	0.681003876	0.016698199	1.777330368
D4A6E3	Murinoglobulin-1 OS=Rattus norvegicus OX=10116 GN=Mug1 PE=1 SV=2	36	44	980	1	1	1487	165.2	6.01	2672.47	44	14	29634203.89	21464913.67	17117462.7	14457797.68	18028188.73	17790707.2	92420054.46	94012632.86	72837954.04	136908137.7	82570548.35	84977242.19	93954428.26	19748878.98	1	1	4.757456277	0.677374806	1.31E-05	4.882728704
Q68FV6	Glycosylated lysosomal membrane protein OS=Rattus norvegicus OX=10116 GN=Glmp PE=2 SV=1	5	1	7	1	1	404	43.8	6.51	23.65	1	0	461362.6427	1145909.75	419789.8549	481288.5527	1069859.386	299235.2217	2267989.418	NA	2557202.166	4027963.257	4077172.085	2318856.219	3049836.629	646240.9014	0.833333333	1	4.719349429	0.673882134	0.000226807	3.644343546
Q68FS1	Cytosolic Fe-S cluster assembly factor NUBP2 OS=Rattus norvegicus OX=10116 GN=Nubp2 PE=1 SV=1	7	1	2	1	1	271	28.9	6.21	4.52	1	0	17717.6295	27470.80664	NA	NA	123441.5781	NA	445233.3561	267858.8485	261347.7387	106417.2912	249755.0258	252423.3072	263839.2613	56210.00476	1	0.5	4.693813181	0.6715258	0.018574016	1.731094185
D3ZBC9	MYCBP-associated, testis expressed 1 OS=Rattus norvegicus OX=10116 GN=Maats1 PE=1 SV=2	1	1	1	1	1	771	90	8.13	1.92	1	0	7565.739972	18733.26758	15084.56153	9928.480286	NA	NA	75241.15211	NA	59104.96732	74853.74244	51183.29476	39840.98966	60044.82926	12828.01234	0.833333333	0.666666667	4.680758613	0.670316245	0.000631585	3.199568193
P13832	Myosin regulatory light chain RLC-A OS=Rattus norvegicus OX=10116 GN=Rlc-a PE=2 SV=2	63	10	232	2	1	172	19.9	4.81	629.45	10	0	764833.8356	3385297.572	924846.4568	1162783.803	2595533.98	789121.3807	9374046.954	639444.8496	5279249.769	19155006.23	5768823.251	4717591.502	7489027.093	1603736.171	1	1	4.669737595	0.669292477	0.049534224	1.305094636
Q4QQS7	Uridine monophosphate synthetase OS=Rattus norvegicus OX=10116 GN=Umps PE=1 SV=1	6	2	8	2	1	481	52.3	6.48	16.08	2	0	146326.7721	194097.7031	173190.557	294772.6838	197349.6982	258147.5055	635047.6763	913736.1838	1243058.962	1574496.742	954911.8818	558069.6175	979886.8439	210647.4866	1	1	4.651785121	0.667619645	0.000625069	3.204072039
A0A0G2K0T2	Tetraspanin OS=Rattus norvegicus OX=10116 GN=Cd63 PE=1 SV=1	7	1	10	1	1	262	28.5	8.41	23.91	1	0	283989.1893	969524.7656	NA	NA	NA	NA	2241664.927	NA	NA	3831325.955	3557295.801	2004838.668	2908781.338	626756.9775	0.666666667	0.333333333	4.641003519	0.666611898	0.033949093	1.469171824
D3ZC15	Capping protein regulator and myosin 1 linker 2 OS=Rattus norvegicus OX=10116 GN=Carmil2 PE=1 SV=2	1	1	1	1	1	1368	148.3	6.93	1.81	1	0	810669.4449	464525.6875	885766.6572	1005582.539	1127012.344	734738.8934	NA	3251803.597	NA	4492558.515	NA	NA	3872181.056	838049.2609	0.333333333	1	4.620469508	0.664686109	0.000108682	3.963842378
B2GV38	Ubiquitin-like protein 4A OS=Rattus norvegicus OX=10116 GN=Ubl4a PE=2 SV=1	20	2	3	2	1	157	17.8	8.44	6.95	2	0	58226.33024	NA	100576.0915	76169.43645	74620.54784	66548.81225	630228.1208	57166.79703	493720.4527	151088.5926	372048.4517	373508.6279	346293.5071	75228.24365	1	0.833333333	4.603237964	0.663063426	0.019981248	1.69937739
Q7M079	Calcium-binding protein 4 (Fragment) OS=Rattus norvegicus OX=10116 PE=1 SV=1	100	2	27	2	1	18	2	4.01	82.86	2	0	681626.634	2018960.875	232464.3322	369600.4389	2726290.913	NA	8551941.435	5404507.377	1009164.406	8184305.952	3716894.895	6149018.286	5502638.725	1205788.639	1	0.833333333	4.563518472	0.659299813	0.011426514	1.942086244
Q7TPB4	CD276 antigen OS=Rattus norvegicus OX=10116 GN=Cd276 PE=2 SV=1	10	3	10	3	1	316	34.1	4.83	17.23	3	0	371901.644	288383.6641	353700.2758	245570.5531	NA	422174.394	1428140.87	3233896.872	1749641.143	692340.1163	1262419.127	834241.4544	1533446.597	336346.1062	1	0.833333333	4.559132896	0.658882252	0.018156311	1.740972387
A0A0G2K3G0	Histidine-rich glycoprotein OS=Rattus norvegicus OX=10116 GN=Hrg PE=1 SV=1	40	18	423	18	1	536	60.3	7.83	1075.35	18	0	155105515.7	41873652.49	37265089.89	58032211.18	48211841.3	48614917.74	439304485.2	66702735.21	298909390.2	193474482.1	287325858.7	485291550	295168083.6	64850538.05	1	1	4.551513256	0.658155812	0.005681302	2.245552124
P08649	Complement C4 OS=Rattus norvegicus OX=10116 GN=C4 PE=1 SV=3	40	59	800	15	1	1737	192	7.33	1912.99	59	44	135253933.2	105884806.8	94549789.39	92013109.03	102017124.4	101608580.3	468369755.8	260878902.9	390693583.7	536623489.4	608036836.3	594130258.5	476455471.1	105221223.9	1	1	4.528130862	0.655918969	4.85E-05	4.314258261
Q3B7D8	Inactive ubiquitin thioesterase OTULINL OS=Rattus norvegicus OX=10116 GN=Otulinl PE=2 SV=1	8	2	3	2	1	353	41.8	9.31	6.2	2	0	285435.8955	334613.9531	280932.3704	168330.9364	279856.6325	265774.3309	NA	NA	1155641.551	1185908.05	1747318.575	761107.319	1212493.874	269157.3531	0.666666667	1	4.504777074	0.653673304	0.000407292	3.39009412
Q91YB6	Complement inhibitory factor H OS=Rattus norvegicus OX=10116 GN=Cfh PE=2 SV=1	55	50	712	46	1	1236	140.3	6.87	1862.89	50	4	152037161.3	49046671.21	72438618.69	66764858.67	65793968.04	55370507.27	407495340.7	63169075.22	456666654.4	483050951.6	258955156.7	396581003.2	344319697	76908630.86	1	1	4.476996835	0.650986787	0.002397407	2.620258231
P69897	Tubulin beta-5 chain OS=Rattus norvegicus OX=10116 GN=Tubb5 PE=1 SV=1	72	26	1393	5	1	444	49.6	4.89	3532.93	26	2	35614575.61	57671423.97	28406566.51	29973578.42	66795362.34	60225356.77	222693388.3	25127684.45	383860375.6	201707936.5	162473048.4	251059084.9	207820253	46447810.6	1	1	4.474274467	0.650722622	0.007479917	2.126103221
D4AE79	Charged multivesicular body protein 1A OS=Rattus norvegicus OX=10116 GN=Chmp1a PE=1 SV=1	4	1	1	1	1	196	21.6	8.06	0	1	0	471371.029	372923.1875	NA	NA	529920.757	NA	2044145.68	1191397.636	3284348.376	NA	2039995.384	1684126.707	2048802.757	458071.6578	0.833333333	0.5	4.472668679	0.650566728	0.013822252	1.859421193
Q64240	Protein AMBP OS=Rattus norvegicus OX=10116 GN=Ambp PE=1 SV=1	29	7	87	7	1	349	38.8	6	258.02	7	0	5588708.467	6154879.672	3060175.277	4443930.962	6935057.202	4495612.67	15612242.81	21257021.26	16881967.07	30067567.75	27222272.73	23911333.33	22492067.49	5113060.709	1	1	4.398943954	0.643348429	2.72E-05	4.565431096
D3ZDS2	Macrophage scavenger receptor 1 OS=Rattus norvegicus OX=10116 GN=Msr1 PE=1 SV=3	6	3	23	3	1	509	55.6	6.98	69.42	3	0	327239.3495	661310.7813	768807.568	NA	1414557.845	1563840.671	1008421.508	3524709.549	3694679.574	6478663.435	7531774.567	2760356.698	4166434.222	947151.243	1	0.833333333	4.398911212	0.643345196	0.017740064	1.751044818
A0A0G2K548	A-kinase-anchoring protein 9 OS=Rattus norvegicus OX=10116 GN=Akap9 PE=1 SV=1	1	3	4	3	1	3847	441.3	5.06	10.16	3	0	37516.68356	NA	NA	136611.7266	136960.9118	NA	247401.9849	371958.1395	448988.7614	551164.8731	500931.4256	611890.6918	455389.3127	103696.4407	1	0.5	4.391561656	0.642618984	0.003458668	2.461091124
P42533	Tissue factor OS=Rattus norvegicus OX=10116 GN=F3 PE=2 SV=1	21	5	30	5	1	295	33.4	9.8	66.89	5	0	3658013.6	4882140.531	2724514.785	2877018.221	3066393.469	3819984.773	5840908.288	1586727.873	34332992.67	15132299.3	27288441.03	8096604.3	15379662.24	3504677.563	1	1	4.388324451	0.64229873	0.048505068	1.314212882
Q9EQV8	Carboxypeptidase N catalytic chain OS=Rattus norvegicus OX=10116 GN=Cpn1 PE=2 SV=1	7	2	4	2	1	457	51.9	8.44	12.37	2	0	233317.4087	93791.98438	151891.8449	107843.3437	260141.0437	191123.9572	458860.6898	336423.7927	612740.803	814223.0526	1120301.15	1210235.402	758797.4818	173018.2638	1	1	4.385649614	0.642033931	0.002599775	2.585064237
B2GUV7	Eukaryotic translation initiation factor 5B OS=Rattus norvegicus OX=10116 GN=Eif5b PE=1 SV=1	10	7	48	7	1	1216	137.6	5.57	129.16	7	0	2844627.043	1515002.984	1576558.166	1753944.599	3459999.427	1278810.237	8512209.322	6412799.181	10981103.62	6232097.496	9200855.431	13167829.19	9084482.373	2071490.409	1	1	4.385481262	0.64201726	0.000116201	3.934790134
F7FHF3	Serpin family F member 2 OS=Rattus norvegicus OX=10116 GN=Serpinf2 PE=1 SV=1	21	7	48	7	1	554	62.3	6.8	125.05	7	0	3079189.39	5224597.223	2172049.623	2450505.305	6356922.251	3504239.003	12391695.61	9648471.35	11704609.97	35145758.57	23931601.49	7057693.331	16646638.39	3797917.132	1	1	4.383096788	0.641781061	0.016066641	1.79407491
A0A0G2K977	Golgin subfamily A member 2 OS=Rattus norvegicus OX=10116 GN=Golga2 PE=1 SV=1	9	8	51	8	1	1026	115.9	4.97	128.79	8	0	3559566.861	2134873.258	2063839.64	1827860.245	2064756.805	2251394.74	13857589.81	5446131.43	9978594.532	9316233.91	7477563.539	14825004.25	10150186.25	2317048.591	1	1	4.380653165	0.64153887	0.000389636	3.409340924
P11466	Peroxisomal carnitine O-octanoyltransferase OS=Rattus norvegicus OX=10116 GN=Crot PE=1 SV=3	2	1	1	1	1	612	70.3	6.73	2.75	1	0	NA	NA	NA	165960.7627	255003.5145	NA	1041018.172	NA	NA	NA	788630.5034	NA	914824.3379	210482.1386	0.333333333	0.333333333	4.346327646	0.638122462	0.034252012	1.465313912
D3ZPE5	VPS53 GARP complex subunit OS=Rattus norvegicus OX=10116 GN=Vps53 PE=1 SV=1	5	3	12	3	1	832	94.4	6.61	29.71	3	0	517199.9881	173232.2344	90742.76577	481213.7864	202020.4234	352149.5441	951188.5147	109321.0478	845135.6847	2875099.798	1548337.62	1544166.067	1312208.122	302759.7904	1	1	4.334155868	0.636904526	0.026199841	1.581701344
A0A0G2K151	Apolipoprotein E OS=Rattus norvegicus OX=10116 GN=Apoe PE=1 SV=1	35	16	312	16	1	359	41.2	5.83	799	16	0	93592287.64	83832088.23	99890567.28	87469582.27	81323597.73	84087599.89	464287400.5	359055508	558308115.4	290840964.4	229383324.5	392618284.5	382415599.6	88365953.84	1	1	4.327635056	0.63625063	0.000119984	3.920876664
B0BN06	Bcas3 protein (Fragment) OS=Rattus norvegicus OX=10116 GN=Bcas3 PE=2 SV=1	8	2	4	2	1	475	52.2	6.95	10.02	2	0	57036.94916	81063.5625	NA	57924.71094	NA	NA	327893.5494	NA	269887.9989	144019.2364	NA	386627.1973	282106.9955	65341.74087	0.666666667	0.5	4.317408624	0.635223155	0.01702161	1.768999364
P08934	Kininogen-1 OS=Rattus norvegicus OX=10116 GN=Kng1 PE=2 SV=1	32	18	155	16	1	639	70.9	6.8	358.01	18	0	28123428.77	10764330.03	14391436.94	12345467.77	8442595.246	10473261.06	96810225.03	22095928.6	71140091.95	29107541.61	49013814.99	96540108.6	60784618.46	14090086.64	1	1	4.313998915	0.634880032	0.0065005	2.187053237
Q63186	Translation initiation factor eIF-2B subunit delta OS=Rattus norvegicus OX=10116 GN=Eif2b4 PE=2 SV=1	36	13	54	13	1	524	57.8	9.17	159.57	13	0	3009355.4	1897219.844	2256638.196	2092781.039	3003606.721	1300968.338	14116192.48	3864184.839	17624370.42	2852718.017	4122138.132	15375374.82	9659163.119	2260094.923	1	1	4.273786477	0.630812821	0.023110951	1.636182183
D3ZXE2	Sister chromatid cohesion protein PDS5 homolog B OS=Rattus norvegicus OX=10116 GN=Pds5b PE=1 SV=1	1	1	2	1	1	1450	164.4	8.62	3.07	1	0	51123.7583	8008.230469	52689.22584	40402.38857	180198.7284	36541.54539	349333.0138	NA	114524.2634	244104.4716	249880.6073	350733.2113	261715.1135	61493.9795	0.833333333	1	4.255946934	0.628996204	0.002324575	2.633656437
F1M3F2	SMAD-specific E3 ubiquitin protein ligase 2 OS=Rattus norvegicus OX=10116 GN=Smurf2 PE=4 SV=2	4	2	5	2	1	637	73.7	6.74	13.51	2	0	617381.1512	NA	NA	127045.1289	NA	NA	1793855.501	NA	1665202.28	NA	NA	1292642.432	1583900.071	372213.1401	0.5	0.333333333	4.255357752	0.628936078	0.019935395	1.700375155
M0RBF1	Complement C3 OS=Rattus norvegicus OX=10116 GN=C3 PE=1 SV=1	54	89	1717	89	1	1663	186.2	6.47	4296.92	89	0	453980512.4	354593708.4	279526951.9	362379336.8	366233649.1	293181200.8	1650080229	1004527710	1231479053	1949677329	1702846471	1421585312	1493366018	351649226.6	1	1	4.246749046	0.628056598	1.16E-05	4.935542011
Q6IMF1	Keratin, type II cytoskeletal 80 OS=Rattus norvegicus OX=10116 GN=Krt80 PE=3 SV=1	6	2	3	2	1	452	50.5	6.2	7.4	2	0	60157.07006	169245.5625	49170.13073	63624.65237	162978.1189	60908.86973	354465.3653	NA	235405.9742	683571.9169	465789.0305	261663.323	400179.122	94347.40072	0.833333333	1	4.241548987	0.627524487	0.003457305	2.461262306
Q5PQJ6	Pyrroline-5-carboxylate reductase 3 OS=Rattus norvegicus OX=10116 GN=Pycr3 PE=2 SV=1	13	2	4	2	1	274	28.9	7.06	12.65	2	0	1186633.978	301272.2109	899336.8844	617248.6614	1713470.549	731077.1169	5530633.861	4567880.439	7342000.881	2143569.156	883272.466	2512190.134	3829924.49	908173.2335	1	1	4.217173936	0.625021514	0.015567697	1.80777563
P80386	5'-AMP-activated protein kinase subunit beta-1 OS=Rattus norvegicus OX=10116 GN=Prkab1 PE=1 SV=4	11	2	3	2	1	270	30.4	6.23	6.81	2	0	32391.11585	145315.0625	NA	NA	161547.3845	NA	783817.1638	627324.7221	435778.3667	210823.6779	379300.2287	423205.1674	476708.2211	113084.5209	1	0.5	4.215503741	0.624849479	0.021177586	1.674123546
Q5XI90	Dynein light chain Tctex-type 3 OS=Rattus norvegicus OX=10116 GN=Dynlt3 PE=1 SV=1	29	2	4	2	1	116	12.9	5.36	8.61	2	0	1241824.709	959053.5625	525072.2846	519669.4808	649020.6709	376596.1216	4603447.926	NA	2385033.745	1592424.71	3386517.387	2994353.239	2992355.401	711872.8049	0.833333333	1	4.203497284	0.623610771	0.001015037	2.993518127
Q4V7A0	WD repeat-containing protein 61 OS=Rattus norvegicus OX=10116 GN=Wdr61 PE=1 SV=1	18	3	10	3	1	305	33.7	5.47	24.17	3	0	317283.1632	356697.2188	165579.9275	208291.8216	234699.4192	NA	2176270.914	713547.954	361239.9226	1915643.179	451678.199	806695.7177	1070845.981	256510.3101	1	0.833333333	4.174670331	0.620622185	0.04607645	1.336520989
A0A0G2K9F2	Uncharacterized protein OS=Rattus norvegicus OX=10116 PE=1 SV=1	5	4	20	4	1	781	89.5	5.97	43.95	4	0	1232391.89	2626172.719	710232.4054	1097581.551	2684909.227	NA	9466336.599	12519578.02	5142235.394	2755185.282	5366802.921	6513018.278	6960526.082	1670257.558	1	0.833333333	4.167336976	0.619858619	0.009704108	2.013044379
A0A0H2UHR6	Coagulation factor X OS=Rattus norvegicus OX=10116 GN=F10 PE=1 SV=1	14	6	37	6	1	494	55.4	5.41	104.77	6	0	1966045.36	1689486.625	2613890.727	1198869.172	1980823.987	2136489.373	3114072.35	19457089.01	3245787.972	4026819.8	7375943.818	11019406.69	8039853.273	1930934.207	1	1	4.16371166	0.619480647	0.041204332	1.385057122
Q5FVP9	Cfh protein OS=Rattus norvegicus OX=10116 GN=LOC100361907 PE=2 SV=1	36	10	98	6	1	393	45.3	7.52	216.83	10	1	1661709.806	1604284.266	1714341.974	1479065.425	1525360.521	978436.5215	5934173.804	2464880.32	2599310.482	13846241.56	3623729.033	8704811.799	6195524.5	1493866.419	1	1	4.147308234	0.617766314	0.026864004	1.570829257
P06214	Delta-aminolevulinic acid dehydratase OS=Rattus norvegicus OX=10116 GN=Alad PE=1 SV=1	35	10	67	10	1	330	36	6.79	165.11	10	0	9711558.977	12505650.44	9236460.962	10110174.99	15654404.38	10012497.4	34813447.84	100985862.4	68244068.25	20139602.16	19133377.54	35312087.1	46438074.21	11205124.52	1	1	4.144360387	0.617457514	0.023013297	1.638021158
M0RBM9	Rho guanine nucleotide exchange factor (GEF) 10-like OS=Rattus norvegicus OX=10116 GN=Arhgef10l PE=1 SV=2	4	4	6	4	1	1279	139.5	6.02	14.02	4	0	622166.817	679765.0625	370037.7238	338385.6969	492296.6836	537144.3239	1642960.043	2081737.364	2111580.936	2209910.098	2441793.137	2100484.285	2098077.644	506632.718	1	1	4.141220197	0.617128323	1.11E-07	6.954677021
D3ZBS2	Inter-alpha-trypsin inhibitor heavy chain H3 OS=Rattus norvegicus OX=10116 GN=Itih3 PE=1 SV=3	15	11	148	11	1	887	99	6.32	322.69	11	0	23124871.43	20390975.25	16100900.66	16150905.59	25138264.11	23619311.19	87130338.27	80041309.04	89921839.12	69707588.58	110590435.1	77727633.86	85853190.67	20754204.7	1	1	4.136664926	0.616650344	7.07E-07	6.150580586
B0K025	Oligosaccharyltransferase complex subunit OSTC OS=Rattus norvegicus OX=10116 GN=Ostc PE=2 SV=1	8	1	17	1	1	149	16.8	9.13	44.06	1	0	8970982.9	8025693.5	3454375.203	2321359.202	8310936.113	4106715.853	8022954.501	62835548.86	15256367.39	15433270.25	24076967.03	19414767.22	24173312.54	5865010.462	1	1	4.121614565	0.615067376	0.047697437	1.321504957
D3ZYD7	Coiled coil domain-containing 88A OS=Rattus norvegicus OX=10116 GN=Ccdc88a PE=1 SV=3	2	2	3	2	1	1512	173.8	6.64	8.4	2	0	213111.4547	321291.375	268753.7558	NA	360606.2299	NA	1189853.085	NA	698717.6253	NA	NA	1706079.303	1198216.671	290940.7039	0.5	0.666666667	4.118422259	0.614730872	0.014231593	1.846746485
A0A0G2K8K3	Heparin cofactor 2 OS=Rattus norvegicus OX=10116 GN=Serpind1 PE=1 SV=1	12	6	41	6	1	511	58	6.73	56.86	6	0	2711275.53	2421070.648	1295334.271	1063106.005	3621457.281	1981219.483	4851648.417	8334993.591	9574126.444	10004589.68	10768401.68	9758237.027	8881999.474	2182243.87	1	1	4.070122316	0.609607461	3.50E-05	4.455931956
M0R7M8	Uncharacterized protein OS=Rattus norvegicus OX=10116 PE=4 SV=2	12	2	15	2	1	329	37.2	8.63	40.17	2	0	417072.4438	407314.7813	402794.1974	284368.9079	747740.8055	315027.0259	3522707.676	293317.1256	2305200.058	1251302.122	1462418.158	1629060.197	1744000.889	429053.027	1	1	4.064767709	0.609035732	0.015121816	1.820396051
G3V6H1	Galactosylceramidase OS=Rattus norvegicus OX=10116 GN=Galc PE=1 SV=3	4	2	3	2	1	684	77	6.42	4.92	2	0	2589039.179	1311745.375	1668543.785	1952135.812	1596874.935	1443869.948	7477430.724	NA	7268632.643	5064360.671	6932477.625	8814684.044	7111517.141	1760368.172	0.833333333	1	4.039789661	0.606358753	7.27E-06	5.138465589
G3V8B1	Glycosylphosphatidylinositol specific phospholipase D1, isoform CRA_a OS=Rattus norvegicus OX=10116 GN=Gpld1 PE=1 SV=1	9	6	27	6	1	843	93.6	6.7	67.51	6	0	1058075.374	1044929.742	1030982.589	945186.0111	1100119.47	919284.6243	2361838.367	2858869.002	2489874.907	4499896.888	7473926.613	4870138.891	4092424.111	1016429.635	1	1	4.0262739	0.604903316	0.003299485	2.481553842
E9PU29	Ring finger protein 31 OS=Rattus norvegicus OX=10116 GN=Rnf31 PE=1 SV=2	8	5	6	5	1	1062	119.2	6.62	16.83	5	0	190337.5929	283622.6797	359587.8459	228419.7583	686617.0268	499948.3098	1951469.704	362104.2752	3032228.406	1264685.822	NA	930006.1955	1508098.881	374755.5356	0.833333333	1	4.024220425	0.604681761	0.025377549	1.595550325
Q9WVR6	Large neutral amino acids transporter small subunit 2 OS=Rattus norvegicus OX=10116 GN=Slc7a8 PE=1 SV=1	5	2	10	2	1	533	58.2	5.73	19.96	2	0	205759.8358	264891.8438	391077.3958	439790.7894	501044.0851	358120.7374	NA	207030.9987	2073009.285	1838004.69	2048256.356	1030070.948	1439274.456	360114.1145	0.833333333	1	3.9967177	0.601703474	0.009721573	2.012263458
Q6AXS3	Protein DEK OS=Rattus norvegicus OX=10116 GN=Dek PE=1 SV=1	3	1	3	1	1	378	42.9	7.69	6.3	1	0	88367.25973	265178.4688	102832.217	111004.5736	157521.0228	135902.6802	287497.0453	302303.6087	467901.1982	802560.8836	NA	1003271.584	572706.864	143467.7037	0.833333333	1	3.991887019	0.601178241	0.009775003	2.009883101
A0A0G2K4D9	Stromal antigen 2 OS=Rattus norvegicus OX=10116 GN=Stag2 PE=1 SV=1	1	1	1	1	1	1268	145.6	5.49	0	1	0	56594.66838	72688.6875	NA	97819.3334	NA	123535.3591	434848.2019	NA	NA	NA	264376.3851	NA	349612.2935	87659.51209	0.333333333	0.666666667	3.988298419	0.600787646	0.00984497	2.006785603
A0A0G2K6T8	Uncharacterized protein OS=Rattus norvegicus OX=10116 PE=4 SV=1	42	3	6	3	1	96	10.3	7.12	14.96	3	0	2320483.333	1913421.5	3752293.004	1502784.888	1219692.146	1515378.73	11168759.06	NA	7599676.329	10919896.56	2251690.73	8671366.784	8122277.892	2037342.267	0.833333333	1	3.986702688	0.600613849	0.003045962	2.516275519
Q5BK59	Cd72 molecule OS=Rattus norvegicus OX=10116 GN=Cd72 PE=1 SV=1	3	1	7	1	1	364	41.7	7.65	18.68	1	0	77620.42384	NA	NA	NA	NA	216734.7186	NA	NA	NA	635512.7321	465804.8449	646189.7467	582502.4412	147177.5712	0.5	0.333333333	3.957820722	0.597456118	0.017644376	1.753393696
D3ZVR7	Prostamide/prostaglandin F synthase OS=Rattus norvegicus OX=10116 GN=Prxl2b PE=3 SV=1	5	1	1	1	1	201	21.6	6.02	2.56	1	0	102080.6789	178532.2031	249021.0767	191326.2175	170935.2881	218273.6003	NA	1587271.275	413826.2055	NA	554082.1798	373091.8968	732067.8892	185028.1774	0.666666667	1	3.956521106	0.597313487	0.04382993	1.358229223
G3V8W1	Ras association (RalGDS/AF-6) domain family 2 OS=Rattus norvegicus OX=10116 GN=Rassf2 PE=4 SV=3	14	4	8	4	1	326	38	7.61	20.68	4	0	542450.5815	556760.125	848477.6791	615382.5079	1409089.938	981846.4558	2688220.453	NA	4875845.306	1825534.163	2707245.1	4022272.534	3223823.511	825667.8813	0.833333333	1	3.904503959	0.591565868	0.001147786	2.940139077
B2RYP8	Gamma-tubulin complex component OS=Rattus norvegicus OX=10116 GN=Tubgcp2 PE=1 SV=1	3	2	8	2	1	905	103	6.64	6.29	2	0	88131.49233	77011.79688	NA	28113.2062	129617.946	18503.77451	340398.3232	204945.7457	213416.6145	NA	158056.1813	414348.6924	266233.1114	68275.64318	0.833333333	0.833333333	3.899386356	0.590996268	0.005167582	2.286712623
Q5M7T5	Serine (Or cysteine) peptidase inhibitor, clade C (Antithrombin), member 1 OS=Rattus norvegicus OX=10116 GN=Serpinc1 PE=1 SV=1	42	17	103	17	1	465	52.2	6.57	242.64	17	0	11651713.85	10003048.65	6553310.222	7921935.813	5609286.049	9680892.886	23328380.25	41667986.1	24601314.25	50244068.52	35953212.12	23688973.69	33247322.49	8570031.245	1	1	3.87948673	0.588774271	0.00036251	3.440680009
F1M7S2	Proteasome inhibitor PI31 subunit OS=Rattus norvegicus OX=10116 GN=Psmf1 PE=1 SV=2	7	1	6	1	1	271	29.9	5.26	10.28	1	0	14917.71941	37462.91406	NA	NA	130780.3089	NA	192314.9137	353954.8083	134373.7087	232096.2399	145455.2741	351069.2596	234877.3674	61053.64746	1	0.5	3.847065281	0.585129556	0.027707751	1.557398724
D3ZJB8	RBR-type E3 ubiquitin transferase OS=Rattus norvegicus OX=10116 GN=Arih2 PE=1 SV=1	9	3	7	3	1	492	57.7	5.76	17.06	3	0	NA	60731.24219	NA	28904.56584	454941.1626	268701.4591	1290237.142	597872.9669	1274690.394	154846.2827	578406.4464	786160.409	780368.9401	203319.6074	1	0.666666667	3.838139125	0.584120713	0.041588474	1.381027015
D4A3U2	Tetraspanin OS=Rattus norvegicus OX=10116 GN=Tspan18 PE=3 SV=1	4	1	2	1	1	248	27.8	5.21	4.04	1	0	35067.47594	84581.50781	20660.31944	23648.47997	75149.03931	17710.33604	134965.256	341661.6467	NA	114922.8382	124360.2813	101495.6829	163481.141	42802.85975	0.833333333	1	3.819397629	0.581994874	0.019719695	1.705099806
Q5BJP3	Ubiquitin-fold modifier 1 OS=Rattus norvegicus OX=10116 GN=Ufm1 PE=3 SV=1	51	2	6	2	1	85	9.1	9.31	13.96	2	0	475033.4108	335207.1875	NA	173019.0485	928463.0579	92668.4182	1820244.573	3151676.449	1239985.543	462400.9821	862056.3201	1628150.578	1527419.074	400878.2246	1	0.833333333	3.810182197	0.580945743	0.03171665	1.49871269
D4A5Q1	Phosphatidylinositol 4,5-bisphosphate 3-kinase catalytic subunit OS=Rattus norvegicus OX=10116 GN=Pik3cd PE=1 SV=2	2	2	4	1	1	944	107.8	7.39	9.27	2	0	NA	45115.04297	NA	NA	66911.4966	103230.9828	289423.4129	54103.25984	351420.0141	234882.5314	403535.5275	302122.5824	272581.2214	71752.50747	1	0.5	3.798908651	0.579658851	0.029061293	1.536685067
Q01177	Plasminogen OS=Rattus norvegicus OX=10116 GN=Plg PE=2 SV=2	68	41	941	41	1	812	90.5	7.08	2421.71	41	0	270072223.5	150009574.3	169758971.6	191451304.1	154074448.4	154471887.6	735658673.5	204694269.5	451946356.4	844225888.6	707234864.5	1194344720	689684128.8	181639734.9	1	1	3.796989294	0.579439373	0.004510206	2.345803622
D4A213	Scavenger receptor class A member 5 OS=Rattus norvegicus OX=10116 GN=Scara5 PE=3 SV=3	6	2	7	2	1	493	53.8	6.73	19.01	2	0	305402.2696	515327.7031	172770.0535	488695.8932	806530.2093	232988.053	2116783.823	NA	2287776.023	934485.6762	858579.002	1778253.973	1595175.699	420285.6969	0.833333333	1	3.795455594	0.579263915	0.00276396	2.558468246
P18395	Cold shock domain-containing protein E1 OS=Rattus norvegicus OX=10116 GN=Csde1 PE=2 SV=1	17	11	39	11	1	798	88.8	6.37	72.91	11	0	1857808.517	2077315.688	2823247.912	2152439.504	4865390.742	3565594.879	15295180.25	12227378.25	16412842.82	5327775.999	9324246.938	7187970.974	10962565.87	2890299.54	1	1	3.792882266	0.578969362	0.001544901	2.811099346
Q62910	Synaptojanin-1 OS=Rattus norvegicus OX=10116 GN=Synj1 PE=1 SV=3	5	5	10	5	1	1574	172.8	6.87	25.96	5	0	678614.9588	957407.3672	261510.3878	521235.1019	267951.1852	278951.6053	1763156.275	1126591.161	2754655.107	603379.4978	2049515.559	2944163.078	1873576.78	494278.4344	1	1	3.790529081	0.578699833	0.005299859	2.275735684
O54892	Mutant type II hexokinase OS=Rattus norvegicus OX=10116 PE=2 SV=1	8	6	33	4	1	917	102.4	6.1	41.99	6	0	167230.0556	400780.2188	872978.6831	997717.9802	1075479.992	184396.8895	1292777.939	NA	2225803.891	1717524.799	4103925.603	NA	2335008.058	616430.6365	0.666666667	1	3.787949397	0.578404169	0.012218323	1.912988398
A0A0G2K2B3	Far upstream element-binding protein 2 OS=Rattus norvegicus OX=10116 GN=Khsrp PE=1 SV=1	3	2	2	2	1	748	76.7	7.33	4.67	2	0	68976.69785	109518.0859	NA	NA	86237.6693	NA	544613.1197	287816.9539	471645.5797	236412.3197	277257.35	187149.2499	334149.0955	88244.15102	1	0.5	3.786642986	0.578254361	0.022943803	1.639334595
Q3SWT7	Nuclear receptor binding protein OS=Rattus norvegicus OX=10116 GN=Nrbp1 PE=1 SV=1	3	1	4	1	1	535	59.8	5.08	7.66	1	0	60797.60653	152525.4063	40932.68068	41031.72836	252607.9879	38361.25783	448159.1184	NA	544095.4474	427969.0324	229236.7239	195778.6018	369047.7848	97709.4446	0.833333333	1	3.776991941	0.577146058	0.004529315	2.343967474
D3ZAS8	Spliceosome-associated factor 3, U4/U6 recycling protein OS=Rattus norvegicus OX=10116 GN=Sart3 PE=1 SV=1	3	2	3	2	1	960	109.4	5.43	7.28	2	0	27191.10658	119460.1563	30131.60496	57588.60136	397952.7419	37092.36061	126465.1617	464338.8572	740212.0989	523132.048	183241.0355	485777.7647	420527.8277	111569.4286	1	1	3.769203023	0.576249531	0.018882139	1.72394881
A0A0G2K5D3	Uncharacterized protein OS=Rattus norvegicus OX=10116 PE=4 SV=1	4	5	18	1	1	1683	188.7	6.54	29.37	5	4	490645.1412	523503.7813	678645.6156	448175.9904	641181.0228	607860.9967	1970247.455	403485.5623	2785904.985	2638209.838	2068705.032	2868920.554	2122578.904	565002.0913	1	1	3.756762916	0.574813788	0.002073957	2.683200252
Q07205	Eukaryotic translation initiation factor 5 OS=Rattus norvegicus OX=10116 GN=Eif5 PE=1 SV=1	15	5	23	5	1	429	48.9	5.52	44.98	5	0	1132481.571	608474.9375	521366.9039	453059.2134	1000116.361	226321.0578	5266828.343	4514332.822	1288858.03	563942.9049	1169204.874	1987198.093	2465060.845	656970.0075	1	1	3.752166486	0.5742821	0.049004249	1.309766262
A0A0A0MY07	Ubiquitin carboxyl-terminal hydrolase 15 OS=Rattus norvegicus OX=10116 GN=Usp15 PE=1 SV=1	3	2	6	2	1	952	109.2	5.11	15.13	2	0	267983.7493	250078.6563	190980.4676	251536.8915	973220.4737	322088.677	NA	1243577.836	904696.9011	NA	2729267	765378.3245	1410730.015	375981.4859	0.666666667	1	3.752126284	0.574277447	0.028202893	1.54970634
Q9JIK3	Regulator of steroidogenic factor-1 (Fragment) OS=Rattus norvegicus OX=10116 PE=2 SV=1	5	1	5	1	1	406	45.6	6.68	10.06	1	0	139657.2434	21281.11914	28723.29171	13135.75301	7971.159439	37791.09406	216952.047	NA	NA	69878.70958	NA	178670.5022	155167.0862	41426.61012	0.5	1	3.74558975	0.573520208	0.028136329	1.550732566
Q6P6Q2	Keratin, type II cytoskeletal 5 OS=Rattus norvegicus OX=10116 GN=Krt5 PE=1 SV=1	16	11	94	5	1	576	61.8	7.8	208.28	11	1	844679.8055	6416833.594	1180538.49	1169217.633	2092337.734	17660898.76	3112591.45	18493790.33	14611523.19	30289214.68	33295157.48	9984571.767	18297808.15	4894084.336	1	1	3.738760285	0.572727621	0.034364997	1.46388369
D3ZUC2	Mov10 RISC complex RNA helicase OS=Rattus norvegicus OX=10116 GN=Mov10 PE=1 SV=1	3	2	5	2	1	1004	113.7	9.1	11.96	2	0	268942.0991	314582.8125	NA	110748.7898	161486.8853	NA	860146.2662	1022592.261	606291.2509	608565.4172	711152.1595	986226.5863	799162.3236	213940.1467	1	0.666666667	3.735448143	0.572342712	0.000411957	3.385148113
D3ZHW0	ATP-dependent RNA helicase DHX29 OS=Rattus norvegicus OX=10116 GN=Dhx29 PE=1 SV=2	8	9	27	9	1	1366	154	8.12	62.94	9	0	1944085.798	1688327.925	1747349.406	1665611.394	19992.27453	1111704.677	6544050.246	4723611.238	5573857.191	1075059.196	5876874.06	6550171.277	5057270.535	1362845.246	1	1	3.710817901	0.569469643	0.002013762	2.695991859
Q5U2M6	DDB1- and CUL4-associated factor 8 OS=Rattus norvegicus OX=10116 GN=Dcaf8 PE=1 SV=1	11	5	14	5	1	591	66.1	5.87	38.68	5	0	243518.1815	798606.5625	227369.0339	1536704.097	1990010.674	808035.925	576102.3557	6054233.936	5875738.957	1144457.567	3761009.3	3296033.664	3451262.63	934040.7456	1	1	3.694980809	0.567612187	0.028039679	1.552226963
P52631	Signal transducer and activator of transcription 3 OS=Rattus norvegicus OX=10116 GN=Stat3 PE=1 SV=1	34	18	125	18	1	770	88	6.3	322.7	18	0	5715623.771	6852512.195	5672182.796	4737983.669	9122206.147	5744211.871	12550600.22	21407007.65	34154031.46	24716096.71	27279347.49	19635052.63	23290356.03	6307453.408	1	1	3.692513368	0.567322076	0.000240966	3.618044232
D3Z890	Sn1-specific diacylglycerol lipase beta OS=Rattus norvegicus OX=10116 GN=Daglb PE=1 SV=3	3	1	11	1	1	669	73.6	6.55	31.91	1	0	89873.09409	193051.0527	28944.24124	61888.70761	542685.145	79014.28751	104877.2003	NA	966320.0974	583561.6329	683335.0877	710395.5749	609697.9186	165909.4214	0.833333333	1	3.674884245	0.565243664	0.018255108	1.738615593
D4ACV0	Negative elongation factor complex member B OS=Rattus norvegicus OX=10116 GN=Nelfb PE=1 SV=1	2	1	8	1	1	580	65.6	6.02	12.18	1	0	45624.27808	54627.54297	22593.3457	34707.72579	89794.32961	45066.87245	140079.7781	165646.7133	169764.0309	221868.6817	180149.8095	195308.1425	178802.8593	48735.68243	1	1	3.668828473	0.564527408	4.90E-06	5.30980392
Q5RK25	Phosphomannomutase OS=Rattus norvegicus OX=10116 GN=Pmm1 PE=1 SV=1	11	2	5	2	1	262	29.7	5.59	11.89	2	0	44610.20676	120275.5078	NA	54142.13138	464206.9183	297780.7973	1154615.724	173429.4597	1339329.899	702998.7709	655681.4307	282748.4814	718133.9609	196203.1123	1	0.833333333	3.660155807	0.563499573	0.042418571	1.372443966
Q5XIR6	Dynein regulatory complex protein 10 OS=Rattus norvegicus OX=10116 GN=Iqcd PE=2 SV=2	3	1	2	1	1	457	53.2	9.17	4.2	1	0	26982.28126	41398.89453	18054.3165	38484.05543	NA	NA	NA	NA	128864.3874	76110.93532	137401.8041	NA	114125.709	31229.88693	0.5	0.666666667	3.654374709	0.562813077	0.004864899	2.312926172
P06762	Heme oxygenase 1 OS=Rattus norvegicus OX=10116 GN=Hmox1 PE=1 SV=1	42	8	87	8	1	289	33	6.54	260.09	8	0	15455116.57	9430819.875	10777337.19	13216185.79	5660044.371	7220334.625	28384497.08	35013436.93	45372767.71	37670479.05	46123793.52	33061394.47	37604394.79	10293306.4	1	1	3.653286254	0.562683703	7.16E-06	5.145086978
O55166	Vacuolar protein sorting-associated protein 52 homolog OS=Rattus norvegicus OX=10116 GN=Vps52 PE=1 SV=2	8	3	4	3	1	723	82.1	5.99	10.45	3	0	194723.1289	62250.62891	251808.9493	207954.3108	280240.2812	167029.21	953500.7237	145269.1564	945827.4445	543467.0471	632263.8848	982257.6542	700430.9851	194001.0849	1	1	3.610448806	0.557561191	0.004293931	2.367144939
G3V9U0	Acyl-CoA synthetase short-chain family member 2 OS=Rattus norvegicus OX=10116 GN=Acss2 PE=1 SV=1	10	5	13	5	1	701	78.8	6.64	30.94	5	0	78333.12057	402930.1094	2072041.809	95903.47394	561893.9986	1952537.935	1672346.732	5882670.459	3105836.6	1702879.724	1902731.44	4371730.617	3106365.928	860606.7411	1	1	3.609506852	0.557447871	0.017960683	1.745677152
A0A0G2K6S9	Myosin-11 OS=Rattus norvegicus OX=10116 GN=Myh11 PE=1 SV=1	48	96	1415	1	1	1979	227.9	5.49	3729.79	96	0	156411.3351	178762.3594	159534.5565	427268.8955	113734.4992	154246.355	423418.4323	115866.0109	1278744.647	852024.2569	927027.4642	659975.4034	709509.3692	198326.3335	1	1	3.577484426	0.553577752	0.014239563	1.846503339
D3ZS39	MMS22-like, DNA repair protein OS=Rattus norvegicus OX=10116 GN=Mms22l PE=4 SV=2	1	1	1	1	1	1240	141.3	6.9	0	1	0	NA	514264	496617.5156	640229.475	635408.7296	451889.7104	1256278.853	2657556.89	NA	NA	NA	NA	1956917.872	547681.8861	0.333333333	0.833333333	3.573092193	0.553044222	0.013350227	1.87451135
D3ZI07	Kinesin-like protein OS=Rattus norvegicus OX=10116 GN=Kif3b PE=1 SV=1	6	4	9	3	1	747	85.2	7.69	22.46	4	1	1213425.69	296611.9063	465513.2832	NA	894970.1243	263912.3929	2671162.011	140848.841	2914523.958	2550343.58	2378032.198	2654304.492	2218202.513	626886.6793	1	0.833333333	3.538442571	0.548812151	0.010577554	1.975614749
D4A6D9	HCLS1-binding protein 3 OS=Rattus norvegicus OX=10116 GN=Hs1bp3 PE=1 SV=1	11	2	16	2	1	390	43.4	5.14	41.8	2	0	191765.0367	349086.543	88586.84378	122080.6039	701193.7182	158750.9688	1341148.008	393447.8052	686890.9577	1160197.317	952263.0027	1155099.635	948174.4543	268577.2857	1	1	3.530359806	0.54781897	0.002687517	2.57064878
Q499R7	Ppa1 protein (Fragment) OS=Rattus norvegicus OX=10116 GN=Ppa1 PE=2 SV=1	14	3	5	3	1	331	37.7	6.84	8.92	3	0	355003.497	190493.125	98958.39926	164998.9074	899912.9075	138130.1641	1051304.933	1155165.07	1317970.05	1364736.174	1352703.244	211319.3486	1075533.137	307916.1667	1	1	3.492941433	0.543191304	0.005604051	2.251497921
A0A096P6L9	Complement C5 OS=Rattus norvegicus OX=10116 GN=C5 PE=1 SV=2	27	38	341	38	1	1681	189	6.62	761.63	38	0	61066234.3	38557198.48	38753206.24	43194182.59	38800766.36	34649924.97	129915782.8	58914193.73	164383739.2	176397038.3	169111797.8	192003215	148454294.5	42503585.49	1	1	3.492747559	0.543167198	0.000367727	3.434474481
D3ZBE5	Serine/threonine-protein kinase Nek7 OS=Rattus norvegicus OX=10116 GN=Nek7 PE=2 SV=1	10	3	6	3	1	302	34.5	8.25	10.65	3	0	699382.8239	584895.5781	273963.7328	232614.5341	360053.6331	1053567.811	1371921.992	2031501.068	2062599.314	1043097.584	2460464.126	2221383.317	1865161.234	534079.6855	1	1	3.492290166	0.543110321	0.00039358	3.404966979
Q63030	Rat alpha-smooth muscle actin mRNA (Fragment) OS=Rattus norvegicus OX=10116 PE=2 SV=1	80	2	48	1	1	35	3.5	4.08	129.86	2	0	533408.5783	812960.5	527269.8584	787116.486	645937.4377	290511.5099	1716869.534	NA	4712520.126	1564047.56	435643.3566	2001751.032	2086166.322	599534.0617	0.833333333	1	3.479646037	0.541535068	0.046752559	1.330194613
Q62902	Protein ERGIC-53 OS=Rattus norvegicus OX=10116 GN=Lman1 PE=1 SV=1	35	14	220	1	1	517	57.9	6.34	588.9	14	0	395801.2292	938396.9063	769316.4377	491458.5143	1341391.805	489268.4725	1666088.507	1880495.384	2050146.52	1086758.981	3404365.182	5270418.985	2559712.26	737605.5608	1	1	3.470299569	0.540366966	0.01770949	1.751793945
Q6P9X7	Txndc9 protein (Fragment) OS=Rattus norvegicus OX=10116 GN=Txndc9 PE=2 SV=1	3	1	2	1	1	259	29.7	6.7	0	1	0	NA	55866.04297	68496.88263	111622.9286	78224.8043	NA	NA	NA	NA	NA	260898.2811	284259.2897	272578.7854	78552.66462	0.333333333	0.666666667	3.470013229	0.54033113	0.000548333	3.260955616
Q99N78	Transient receptor potential Ca2+ channel 6A OS=Rattus norvegicus OX=10116 GN=Trpc6 PE=1 SV=1	1	1	6	1	1	930	106.5	7.01	10.65	1	0	41461.54378	96179.61719	22703.28445	35694.74762	130274.3568	67666.83177	214446.6492	NA	109547.0538	263152.4665	281542.6394	264041.2464	226546.0111	65663.39694	0.833333333	1	3.450111045	0.537833073	0.001030297	2.987037565
P61227	Ras-related protein Rap-2b OS=Rattus norvegicus OX=10116 GN=Rap2b PE=2 SV=1	35	5	50	3	1	183	20.5	4.81	114.45	5	0	1284531.291	1648483.688	471577.9955	492445.5108	2523133.769	898418.2044	2664071.641	1129911.963	3734138.454	6522968.876	6034301.45	5060060.348	4190908.789	1219765.076	1	1	3.435832743	0.536032014	0.008255565	2.083253199
Q6TMG5	NF-kappa-B essential modulator OS=Rattus norvegicus OX=10116 GN=Ikbkg PE=2 SV=1	16	5	43	5	1	412	48	5.83	121.11	5	0	1483519.627	826566.5938	1052883.297	2039927.231	2547064.061	1559490.292	5117113.918	1590837.048	5868691.655	5522803.08	5390268.726	9134288.491	5437333.82	1584908.517	1	1	3.430692536	0.535381798	0.003461058	2.460791123
D3ZFJ3	SH3 domain-binding protein 1 OS=Rattus norvegicus OX=10116 GN=Sh3bp1 PE=1 SV=1	15	7	27	7	1	689	74.8	6.6	66.85	7	0	494405.5179	437351.7344	358255.2619	1431842.666	1071066.306	578398.1318	1347575.321	653775.3258	3395446.637	2589746.443	2544424.527	4373272.182	2484040.073	728553.2696	1	1	3.409551746	0.532697286	0.012344623	1.908522169
G3V6N7	RCG27287, isoform CRA_a OS=Rattus norvegicus OX=10116 GN=Slc12a6 PE=1 SV=1	5	6	22	3	1	1150	127.5	7.14	40.31	6	0	376790.9645	264804.3438	266148.004	NA	2014504.493	322172.5622	1787957.589	NA	2594760.939	2507344.42	2641408.858	1518926.291	2210079.619	648884.0735	0.833333333	0.833333333	3.405969894	0.532240805	0.005415223	2.266383654
A0A0G2JV05	Maestro heat-like repeat family member 1 OS=Rattus norvegicus OX=10116 GN=Mroh1 PE=1 SV=1	1	1	2	1	1	1640	181.8	6.38	5.48	1	0	86025.05997	128587.4531	55232.09293	77448.0318	226756.698	70340.70027	267185.4424	103605.0321	325058.2813	479740.7233	580094.2245	435028.9879	365118.7819	107398.3394	1	1	3.399668786	0.531436608	0.005861996	2.231954482
A0A3B0J380	Adiponectin c OS=Rattus norvegicus OX=10116 GN=Adic PE=4 SV=1	19	4	19	4	1	257	27.2	8.88	45.41	4	0	7089843.649	988719.25	1904570.452	NA	1745066.137	1303548.97	14379865.46	3118295.176	12031777.71	7568328.423	4619604.902	11216529.79	8822400.243	2606349.692	1	0.833333333	3.38496414	0.529554072	0.022046773	1.65665497
F1M9Q3	Listerin E3 ubiquitin protein ligase 1 OS=Rattus norvegicus OX=10116 GN=Ltn1 PE=1 SV=2	1	1	2	1	1	1798	201.8	6.19	4.13	1	0	20401.80707	33277.73438	NA	NA	96322.18316	NA	177791.3119	160152.0055	NA	NA	NA	NA	168971.6587	50000.57487	0.333333333	0.5	3.379394319	0.52883887	0.031165915	1.506320118
F1M7Q5	AMP deaminase OS=Rattus norvegicus OX=10116 GN=Ampd3 PE=1 SV=2	8	6	33	6	1	801	92.2	7.3	52.66	6	0	5302314.5	634734.9844	1744661.447	1874509.966	1719626.306	1092653.729	7989554.87	45357.10797	11928398.95	5406580.555	6722297.573	9481008.264	6928866.22	2061416.822	1	1	3.361215522	0.52649636	0.021579343	1.665961782
A0A0G2K926	Murinoglobulin-1 OS=Rattus norvegicus OX=10116 GN=LOC297568 PE=1 SV=1	40	51	1207	2	1	1477	163.6	6.01	3264.88	51	52	363677400.8	292752984.1	151218533.3	205624626.5	372717971.8	191942871.9	824782013.9	967305027.2	678135132.5	1076077241	883734605	873312691.3	883891118.5	262989064.7	1	1	3.360942477	0.52646108	3.08E-06	5.511449283
B2RYJ7	ARP1 actin-related protein 1 homolog B OS=Rattus norvegicus OX=10116 GN=Actr1b PE=1 SV=1	35	9	85	4	1	376	42.3	6.4	207.9	9	0	549282.6022	1577707.359	340709.3241	1483775.826	1733014.041	572070.1094	4039626.97	1757226.081	5782564.383	3022150.398	2021850.508	4236425.289	3476640.605	1042759.877	1	1	3.334075929	0.522975486	0.004529863	2.343914932
A0MZ67	Shootin-1 OS=Rattus norvegicus OX=10116 GN=Shtn1 PE=1 SV=1	3	2	2	2	1	633	71.4	5.44	4.51	2	0	164091.5157	286279.2813	129775.3625	NA	218946.5524	165293.7714	786128.8363	846889.3728	643859.6183	746661.303	182932.6234	NA	641294.3508	192877.2967	0.833333333	0.833333333	3.324882513	0.521776304	0.006356814	2.196760496
F1M1Q7	Uncharacterized protein OS=Rattus norvegicus OX=10116 PE=4 SV=3	20	2	18	1	1	134	14.6	5.29	50.59	2	0	NA	2766908.25	6360496.911	3381458.802	NA	3001890.608	14614569.12	NA	NA	11126797.9	NA	NA	12870683.51	3877688.643	0.333333333	0.666666667	3.319163733	0.521028677	0.005487454	2.260629107
O35095	Neurochondrin OS=Rattus norvegicus OX=10116 GN=Ncdn PE=1 SV=2	3	2	3	2	1	729	78.9	5.62	6.57	2	0	83965.58102	128467.8906	89177.99011	114857.822	155203.1673	126010.9422	674110.1997	176371.7676	518902.3054	333899.7502	400698.2804	211528.4282	385918.4553	116280.5655	1	1	3.318856023	0.520988412	0.006057859	2.217680839
M0R7I0	Importin subunit alpha OS=Rattus norvegicus OX=10116 GN=LOC100359600 PE=3 SV=1	9	3	4	3	1	529	57.8	5.58	10.74	3	0	262216.2416	49863.08984	277367.9022	313024.0411	313146.8363	NA	874570.2126	760911.4817	310538.6047	476071.4192	1171869.752	1239079.026	805506.7492	243123.6222	1	0.833333333	3.313157076	0.520242026	0.009863177	2.005983173
Q5GFD9	Protein IMPACT OS=Rattus norvegicus OX=10116 GN=Impact PE=1 SV=1	10	2	2	2	1	317	36	5.16	4.67	2	0	31134.18054	NA	43321.6672	59136.50221	131158.83	NA	261141.1234	235022.8985	NA	NA	256648.8113	122175.6365	218747.1174	66187.795	0.666666667	0.666666667	3.304946439	0.519164426	0.008464864	2.072380015
D3ZS88	Activating transcription factor 7-interacting protein OS=Rattus norvegicus OX=10116 GN=Atf7ip PE=1 SV=3	0	1	5	1	1	1309	139.2	4.89	0	1	0	352504.4984	297040.2813	560712.1169	326781.6079	291986.7534	433714.608	999724.9901	605148.8765	974718.1573	1012273.264	1515013.856	2358626.968	1244251.019	377123.311	1	1	3.299321422	0.518424627	0.006892914	2.16159714
A0A0G2JX72	Muscleblind-like-splicing regulator 1 OS=Rattus norvegicus OX=10116 GN=Mbnl1 PE=1 SV=1	5	2	10	2	1	436	47.2	8.62	10.33	2	0	1579385.93	2208249	2702230.663	935894.8728	1991818.553	1542075.56	10279477.29	3067044.501	8275882.336	4194496.16	3912344.508	6341723.233	6011828.005	1826609.096	1	1	3.291250447	0.517360931	0.005271368	2.278076664
A1L1K8	Intracellular hyaluronan-binding protein 4 OS=Rattus norvegicus OX=10116 GN=Habp4 PE=1 SV=1	4	1	1	1	1	411	45.8	6.84	2.55	1	0	52120.63548	NA	NA	10683.90796	NA	NA	103031.0574	144898.384	81817.28065	NA	NA	82541.54141	103072.0659	31402.27172	0.666666667	0.333333333	3.2823124	0.516179913	0.048551561	1.313796802
A0A0G2JZ53	Baculoviral IAP repeat-containing 6 OS=Rattus norvegicus OX=10116 GN=Birc6 PE=1 SV=1	5	18	73	18	1	3993	434	6.19	127.52	18	0	628024.3228	2247612.865	1486845.211	2376481.648	2695107.032	2778072.219	6834535.949	3082904.303	14915297.52	5929473.476	5701855.557	3592103.238	6676028.341	2035357.216	1	1	3.280027843	0.51587753	0.026302968	1.579995243
B2RYM3	Inter-alpha trypsin inhibitor, heavy chain 1 OS=Rattus norvegicus OX=10116 GN=Itih1 PE=1 SV=1	18	13	89	13	1	904	100.5	6.86	223.65	13	0	10192111.12	11501375.02	10386139.65	8673335.896	12679643.78	9914871.663	34414579.56	18807768.76	40319935.61	39634869.45	42367280.28	32181359.68	34620965.56	10557912.86	1	1	3.279148637	0.515761103	5.15E-05	4.288192771
B1WC32	RCG53609 OS=Rattus norvegicus OX=10116 GN=Uba2 PE=2 SV=1	2	1	2	1	1	639	70.7	5.25	5.62	1	0	NA	NA	166080.3333	280255.3179	590955.2623	NA	1398828.718	1668186.979	1390956.749	915209.9465	819784.5944	592497.0789	1130910.678	345763.6378	1	0.5	3.270762318	0.514648986	0.019900235	1.701141795
M0R436	Ring finger protein 170 OS=Rattus norvegicus OX=10116 GN=Rnf170 PE=1 SV=2	5	1	8	1	1	257	29.7	5.41	23.15	1	0	NA	NA	320971.0098	264337.4138	NA	503139.7087	NA	952331.0175	NA	NA	1128390.064	1472445.603	1184388.895	362816.0441	0.5	0.5	3.264433626	0.513807843	0.00824877	2.083610806
A0A0G2K135	Complement factor I OS=Rattus norvegicus OX=10116 GN=Cfi PE=1 SV=1	15	6	35	6	1	626	69.7	7.52	92.92	6	0	1615058.156	1402488.969	2003754.123	1569921.596	1742439.112	1415472.882	4085069.331	5242906.769	1975294.531	10176221.25	5541494.478	4746250.096	5294539.409	1624855.806	1	1	3.258467236	0.513013359	0.007912129	2.101706641
D3ZJ91	DDHD domain-containing 2 OS=Rattus norvegicus OX=10116 GN=Ddhd2 PE=1 SV=2	1	1	2	1	1	699	79.5	5.27	3.94	1	0	NA	177877.1406	216665.3694	103896.8752	301878.3989	135316.3045	591407.5177	211684.1524	935013.4417	379120.1444	NA	929679.9033	609381.0319	187126.8177	0.833333333	0.833333333	3.256513627	0.5127529	0.022000873	1.657560086
F1LYZ8	Protein phosphatase 1, regulatory subunit 21 OS=Rattus norvegicus OX=10116 GN=Ppp1r21 PE=1 SV=3	15	8	40	8	1	780	88.3	6.96	97.43	8	0	796682.9891	1423593.656	636711.343	1662917.883	1576633.119	1906291.459	6314891.886	3939942.185	3748530.088	2777846.913	3846552.82	5352840.405	4330100.716	1333805.075	1	1	3.246426931	0.511405632	0.00032188	3.492306007
A0A0G2K719	DEAD-box helicase 3, X-linked OS=Rattus norvegicus OX=10116 GN=Ddx3x PE=1 SV=1	40	23	322	3	1	662	73.1	7.18	730.1	23	0	9491620.066	3964549.125	3910640.06	2451865.73	3399254.877	3398472.147	22702525	18143306.85	14048012.49	5701374.558	9356069.782	16321742.4	14378838.51	4436067.001	1	1	3.241348363	0.510725709	0.00430632	2.365893701
D4AAT4	RCG48672 OS=Rattus norvegicus OX=10116 GN=Snrpf PE=1 SV=1	9	1	5	1	1	86	9.7	4.67	10.08	1	0	NA	NA	756538.6114	410520.6298	NA	528708.4528	2513470.573	2292347.75	2016923.304	NA	1040634.045	1238906.285	1820456.391	565255.898	0.833333333	0.5	3.220588052	0.507935177	0.01900967	1.721025422
A0A0G2K896	Similar to RIKEN cDNA 1300017J02 OS=Rattus norvegicus OX=10116 GN=RGD1310507 PE=1 SV=1	55	33	378	32	1	700	76.7	6.96	942.61	33	0	38329136.8	31217313.57	25585874.87	35178654.2	30246819.09	30124883.32	73705825.41	41974777.42	92937055.78	199796783.4	108361918.4	97014127.56	102298414.7	31780446.97	1	1	3.218910507	0.507708902	0.00887241	2.051958397
A0A0G2JYH7	SH2 domain containing 3C (Predicted) OS=Rattus norvegicus OX=10116 GN=Sh2d3c PE=1 SV=1	2	1	3	1	1	853	93.9	7.96	6.74	1	0	NA	94954.20313	NA	NA	133543.9584	50801.79821	NA	NA	262818.9736	204829.8105	NA	428351.5957	298666.7932	93099.98657	0.5	0.5	3.208021872	0.506237321	0.044519656	1.3514482
G3V9T9	Tyrosine-protein phosphatase non-receptor type OS=Rattus norvegicus OX=10116 GN=Ptpn6 PE=1 SV=1	49	25	216	25	1	613	69.6	7.75	487.88	25	0	15842988.48	17897287.79	18264133.59	18405586.73	19806670.3	23787559.67	65394910.25	29585620.65	97846396.21	61083659.38	63938382.7	47729882.82	60929808.67	19000704.43	1	1	3.206713146	0.506060112	0.00111235	2.953758541
F1LV21	Ubiquitin-associated and SH3 domain-containing, B OS=Rattus norvegicus OX=10116 GN=Ubash3b PE=4 SV=2	2	1	1	1	1	638	71.5	6.81	1.72	1	0	17127.85375	NA	60329.9337	NA	50059.12776	NA	165679.9532	89000.44732	122739.3297	NA	NA	167779.1719	136299.7255	42505.63841	0.666666667	0.5	3.206626948	0.506048438	0.01296882	1.887099537
Q2TBJ5	Ubiquitin-like protein ATG12 OS=Rattus norvegicus OX=10116 GN=Atg12 PE=2 SV=1	7	1	1	1	1	141	15.3	4.97	1.66	1	0	47412.20806	53369.00391	30429.39795	NA	151939.9898	NA	267138.7073	NA	299769.1537	210350.3832	176115.7977	181301.4576	226935.0999	70787.64994	0.833333333	0.666666667	3.205857237	0.505944178	0.003758856	2.424944312
A0A0G2JY98	Uncharacterized protein OS=Rattus norvegicus OX=10116 PE=1 SV=1	11	1	6	1	1	140	15.4	8.87	14.65	1	0	317337.6292	285916.7188	235917.3546	269484.312	137811.614	208004.5157	1609784.901	NA	575516.1784	939128.1508	578595.76	175372.7007	775679.5381	242412.0241	0.833333333	1	3.199839369	0.505128177	0.037985398	1.420383319
Q8R2E7	FAS-associated death domain protein OS=Rattus norvegicus OX=10116 GN=Fadd PE=1 SV=1	6	1	4	1	1	208	23.1	5.55	8.71	1	0	NA	NA	NA	63265.17705	527151.7105	66535.90492	827142.2545	642907.7185	609582.714	719209.8958	NA	NA	699710.6457	218984.2642	0.666666667	0.5	3.195255369	0.504505573	0.019058943	1.719901189
Q4QQV0	Tubulin beta chain OS=Rattus norvegicus OX=10116 GN=Tubb6 PE=1 SV=1	47	18	672	7	1	447	50	4.89	1668.65	18	0	5427965.521	3586312.203	5468734.096	6003975.412	9350956.818	5020862.768	16354757.91	2775927.704	28050956.28	19613469.87	22061754.05	22153289.64	18501692.58	5809801.136	1	1	3.184565554	0.503050193	0.005485438	2.260788689
D3ZWH1	Stabilin 1 OS=Rattus norvegicus OX=10116 GN=Stab1 PE=1 SV=2	14	21	135	21	1	2252	242	6.77	299.39	21	0	4268488.587	5511710.285	8343264.478	4526678.243	8075536.265	4210342.033	11578685.85	1689429.764	16821596.84	18310971.94	33959537.53	28672749.89	18505495.3	5822669.982	1	1	3.178180347	0.502178538	0.024869525	1.60433251
D3ZBP4	[F-actin]-monooxygenase MICAL1 OS=Rattus norvegicus OX=10116 GN=Mical1 PE=1 SV=1	7	6	25	6	1	1047	116.6	6.05	56.8	6	0	944101.5736	872701.7656	292942.733	950146.4286	1175488.944	682670.8621	1560433.62	1036870.91	5649635.187	2364492.522	3381426.043	1565094.526	2592992.135	819675.3844	1	1	3.163437849	0.500159306	0.031112625	1.507063346
Q5RKH5	Phosphorylase b kinase regulatory subunit OS=Rattus norvegicus OX=10116 GN=Phkb PE=1 SV=1	1	1	3	1	1	1100	125.8	6.98	8.56	1	0	114852.2635	107034.5	115750.7873	122039.6291	194123.846	101365.2647	385019.2662	231605.7454	551251.519	349637.6677	395977.9168	474445.0621	397989.5295	125861.0484	1	1	3.16213423	0.499980301	0.000166228	3.77929582
Q9EQV9	Carboxypeptidase B2 OS=Rattus norvegicus OX=10116 GN=Cpb2 PE=2 SV=1	6	2	10	2	1	422	48.8	8.41	19.18	2	0	636799.5534	362578.5313	319366.3839	332586.6522	270554.5123	333324.4434	1001575.18	727520.8667	1093312.025	1475349.803	1172054.629	1614196.836	1180668.223	375868.3461	1	1	3.141174924	0.497092122	0.000208985	3.679884884
Q4AEF8	Coatomer subunit gamma-1 OS=Rattus norvegicus OX=10116 GN=Copg1 PE=2 SV=1	39	25	343	23	1	874	97.6	5.39	788.08	25	2	32251889.08	18472634.75	43794806.71	37450216.37	30136705.34	18729014.24	90574793.52	55215438.83	102546315.9	54405871.82	135211713	129924953.8	94646514.47	30139211.08	1	1	3.14031161	0.496972745	0.001486213	2.827918944
A0A0G2JTL6	Caspase recruitment domain family, member 6 OS=Rattus norvegicus OX=10116 GN=Card6 PE=1 SV=1	2	1	7	1	1	1126	124.9	6.81	18.26	1	0	214666.358	4229.487305	55913.817	NA	NA	120289.1476	283879.6907	335307.858	480120.5742	140680.8667	NA	NA	309997.2474	98774.70247	0.666666667	0.666666667	3.138427549	0.496712107	0.044644167	1.350235276
D3ZKR9	Terminal uridylyl transferase 7 OS=Rattus norvegicus OX=10116 GN=Tut7 PE=1 SV=3	5	6	7	6	1	1479	168.2	6.67	12.97	6	0	3141575.807	1358881.665	335475.1901	589040.8616	1131943.25	443330.5482	4739107.8	4233258.697	3878322.037	1917437.505	2940772.376	4245117.401	3659002.636	1166707.887	1	1	3.136177167	0.496400589	0.00204304	2.68972313
A5H2Z9	Toll-like receptor 7 OS=Rattus norvegicus OX=10116 GN=Tlr7 PE=2 SV=1	1	1	1	1	1	1050	121.2	6.84	0	1	0	NA	NA	75350.76864	NA	NA	44155.80227	NA	NA	151402.7761	190919.042	240561.3038	165915.0564	187199.5446	59753.28546	0.666666667	0.333333333	3.132874504	0.495942998	0.01451122	1.838296074
F1LNG5	Phosphatidylinositol 3-kinase regulatory subunit alpha OS=Rattus norvegicus OX=10116 GN=Pik3r1 PE=1 SV=2	3	2	4	2	1	724	83.5	6.33	9.28	2	0	443299.8265	445020.2813	259767.1733	572765.3539	642002.5762	425787.2147	1658662.849	552340.7267	2093233.282	1493091.659	996668.7784	1912595.975	1451098.878	464773.7376	1	1	3.122161949	0.494455427	0.002292253	2.63973745
D3ZLD5	Golgin A3 OS=Rattus norvegicus OX=10116 GN=Golga3 PE=1 SV=1	17	18	54	18	1	1447	162.4	5.38	141.91	18	0	3611317.283	3580201.266	4874700.607	5578973.239	7562128.474	3132173.608	21302279	7104546.906	16463463.49	13731566.72	14931689.71	14604874.11	14689736.65	4723249.079	1	1	3.110091466	0.492773162	0.000538707	3.268647381
Q9Z2X9	BEIGE OS=Rattus norvegicus OX=10116 GN=Lyst PE=2 SV=1	0	1	2	1	1	3788	426.3	6.52	3.52	1	0	30288.17183	23354.84961	NA	NA	28670.913	NA	104036.3769	69794.16078	104042.5866	23951.38062	81355.59601	127418.2466	85099.72458	27437.97815	1	0.5	3.101530445	0.491576049	0.031928411	1.495822695
P17955	Nuclear pore glycoprotein p62 OS=Rattus norvegicus OX=10116 GN=Nup62 PE=1 SV=1	3	1	1	1	1	525	53.4	5.31	2.44	1	0	34366.58391	97609.89063	22642.79639	91938.11649	113196.4515	35475.81734	262163.223	54642.61507	154442.4427	343579.4814	NA	NA	203706.9406	65871.60937	0.666666667	1	3.092484646	0.490307552	0.033262717	1.478042279
Q9JHZ4	GRIP1-associated protein 1 OS=Rattus norvegicus OX=10116 GN=Gripap1 PE=1 SV=1	9	6	6	6	1	837	96	5.21	15.87	6	0	702832.0729	75830.97656	870233.0124	1237209.327	645355.069	648776.7893	2542227.489	942965.9016	4010602.207	1114762.859	NA	NA	2152639.614	696706.2079	0.666666667	1	3.089737955	0.489921648	0.040801515	1.389323711
D4ABK1	Synaptogyrin 3 OS=Rattus norvegicus OX=10116 GN=Syngr3 PE=1 SV=1	8	1	3	1	1	199	21.4	9.04	7.5	1	0	142082.173	354063.4688	865973.0465	353055.1652	279242.3535	439680.4232	NA	NA	1097904.033	1396262.151	NA	NA	1247083.092	405682.7717	0.333333333	1	3.074035131	0.487708826	0.0052272	2.281730883
D4A746	GDP-mannose pyrophosphorylase B OS=Rattus norvegicus OX=10116 GN=Gmppb PE=1 SV=1	15	4	29	4	1	360	39.9	6.74	75.77	4	0	2870361.394	2762406.969	2296520.982	1398117.647	2274276.681	2515192.795	7013338.816	7816652.613	14688861.22	6002791.738	3445662.95	4228708.331	7199335.944	2352812.745	1	1	3.059884795	0.485705076	0.015112562	1.820661904
Q6MG90	Complement C4B (Chido blood group) OS=Rattus norvegicus OX=10116 GN=C4b PE=1 SV=1	30	49	619	5	1	1737	192	7.05	1496	49	0	3945204.459	2591717.5	2278553.357	1499928.067	2211821.297	2361900.699	10400425.55	1678239.028	6339323.441	6762836.532	8588705.675	11647660.77	7569531.833	2481520.897	1	1	3.0503599	0.484351083	0.006379323	2.195225408
Q2KN99	Cytospin-A OS=Rattus norvegicus OX=10116 GN=Specc1l PE=1 SV=1	2	2	3	2	1	1118	124.3	5.8	6.72	2	0	125908.3335	233901.6328	NA	284246.54	NA	NA	847479.9862	NA	NA	790709.6079	581790.8432	392523.4276	653125.9662	214685.5021	0.666666667	0.5	3.04224533	0.483194233	0.01931616	1.714079206
B5DF98	Map3k3 protein OS=Rattus norvegicus OX=10116 GN=Map3k3 PE=1 SV=1	5	3	20	2	1	626	70.6	8.87	34.4	3	0	259899.2283	2122193.453	318774.3565	290085.0572	NA	166381.0085	2205889.479	2583251.463	2879251.71	333224.6825	1885836.681	1600314.787	1914628.134	631466.6207	1	0.833333333	3.032033794	0.481734037	0.038089011	1.419200304
F1LM16	Plasminogen activator inhibitor 1 OS=Rattus norvegicus OX=10116 GN=Serpine1 PE=3 SV=1	2	1	1	1	1	402	45	6.64	0	1	0	269794.8651	319832.0938	278811.1517	NA	462590.8302	319215.3915	NA	NA	593616.1113	1317360.123	1317365.167	758655.9945	996749.3491	330048.8665	0.666666667	0.833333333	3.02000537	0.480007715	0.00571288	2.243144898
F1M1H0	Deoxyribose-phosphate aldolase OS=Rattus norvegicus OX=10116 GN=Dera PE=1 SV=3	51	11	60	11	1	318	35.1	8.59	138.64	11	0	5771954.563	4171660.18	4965284.117	3572879.327	2963283.644	3488276.522	8316350.863	23483594.17	9064290.445	4811759.801	11780392.24	17598007.33	12509065.81	4155556.392	1	1	3.010202396	0.478595697	0.014608228	1.835402461
D4A4S5	Folate receptor 2 (Fetal) (Predicted), isoform CRA_a OS=Rattus norvegicus OX=10116 GN=Folr2 PE=1 SV=1	15	4	16	4	1	252	29.2	7.31	33.48	4	0	1351047.073	1896819.203	516377.2704	1467444.663	1816151.722	1035978.948	1193139.948	1578054.79	8305788.327	4196873.581	5976839.785	3034490.13	4047531.094	1347303.147	1	1	3.004172523	0.47772487	0.03832198	1.41655206
Q6P734	Plasma protease C1 inhibitor OS=Rattus norvegicus OX=10116 GN=Serping1 PE=2 SV=1	31	12	164	12	1	504	55.6	5.83	439.71	12	0	17552150.89	12695725.63	8484560.286	10182242.94	16394994.07	8731851.391	29320258.53	19288737.55	34158601.71	44974895.28	46701795.68	47249970.31	36949043.18	12340254.2	1	1	2.994188172	0.47627909	0.000518683	3.285097986
G3V9W5	Phosphatidylinositol 5-phosphate 4-kinase type-2 gamma OS=Rattus norvegicus OX=10116 GN=Pip4k2c PE=1 SV=1	3	1	5	1	1	421	47.3	6.89	15.76	1	0	208223.2571	338074.6875	126408.9777	167589.394	304602.956	90129.45488	1004915.058	317860.6968	487617.2192	578463.5843	669686.866	629657.5311	614700.1593	205838.1212	1	1	2.986328071	0.475137517	0.002417384	2.616654357
Q924K2	FAS-associated factor 1 OS=Rattus norvegicus OX=10116 GN=Faf1 PE=1 SV=1	7	3	3	3	1	649	73.7	4.83	7.75	3	0	267897.9368	275283.9297	108311.1769	173755.1378	301185.2279	167330.1572	627011.6914	1162310.205	616321.5135	588459.0956	NA	223350.0964	643490.5204	215627.261	0.833333333	1	2.98427257	0.474838487	0.013505768	1.869480715
E9PU24	Dynein, axonemal, heavy chain 11 OS=Rattus norvegicus OX=10116 GN=Dnah11 PE=4 SV=3	1	2	3	2	1	4487	515.4	6.27	0	2	0	17714.90161	87012.85938	NA	78700.37295	61724.40527	26451.02459	175482.1797	NA	156611.4623	209272.4326	143789.122	123617.8413	161754.6076	54320.71276	0.833333333	0.833333333	2.977770345	0.473891201	0.000691231	3.160376793
Q80Z29	Nicotinamide phosphoribosyltransferase OS=Rattus norvegicus OX=10116 GN=Nampt PE=1 SV=1	36	12	89	12	1	491	55.4	7.15	185.62	12	0	5728292.687	6700504.713	5324951.006	5748731.575	12563843.04	6176280.112	12562316.04	46781327.11	28626068.32	6179700.409	13595545.28	17622710.36	20894611.25	7040433.855	1	1	2.967801656	0.472434873	0.046577085	1.331827695
B4F7C2	Tubulin beta chain OS=Rattus norvegicus OX=10116 GN=Tubb4a PE=1 SV=1	66	23	1258	3	1	444	49.6	4.88	3090.55	23	0	74853.59167	NA	460796.5053	310772.8308	NA	288002.3154	1128423.911	NA	502939.2013	887058.2261	NA	NA	839473.7795	283606.3108	0.5	0.666666667	2.959996825	0.471291245	0.026707427	1.57336795
Q5XIF6	Tubulin alpha-4A chain OS=Rattus norvegicus OX=10116 GN=Tuba4a PE=1 SV=1	58	21	885	8	1	448	49.9	5.06	2354.43	21	0	89651503.06	104928114	60367635.01	86874967.97	166933160.2	90543493.26	278457545.9	141456893.8	562192174.3	273126089.4	225820536.8	287656761.7	294785000.3	99883145.59	1	1	2.951298726	0.47001317	0.008523933	2.069359973
Q5BK64	Ribonuclease P protein subunit p40 OS=Rattus norvegicus OX=10116 GN=Rpp40 PE=2 SV=2	4	1	1	1	1	363	41.6	6.86	1.74	1	0	133279.8363	119746.6172	54364.3135	59956.65551	NA	42040.98393	NA	NA	370425.8606	NA	185342.4745	169128.5743	241632.3031	81877.68129	0.5	0.833333333	2.951137591	0.469989458	0.024025548	1.619326698
P20059	Hemopexin OS=Rattus norvegicus OX=10116 GN=Hpx PE=1 SV=3	53	24	916	24	1	460	51.3	7.65	2344.13	24	0	153156277.5	151527463.7	129033206.6	123874132.5	138993661.6	143079480.7	319823681.2	229304246.5	466721828.5	655121342.8	494691228.6	311382722	412840841.6	139944037.1	1	1	2.950042389	0.469828256	0.001596604	2.796802787
G3V645	2'-5'-oligoadenylate synthase-like protein 1 OS=Rattus norvegicus OX=10116 GN=Oasl PE=2 SV=1	5	2	6	2	1	512	58.9	7.23	14.76	2	0	79692.81498	71023.96875	25009.17777	NA	99243.87741	35224.71511	NA	NA	171200.2589	171713.7943	190565.6713	194947.0708	182106.6988	62038.9108	0.666666667	0.833333333	2.935362605	0.467661757	0.000178012	3.74955072
P97520	C5a anaphylatoxin chemotactic receptor 1 OS=Rattus norvegicus OX=10116 GN=C5ar1 PE=1 SV=1	4	1	3	1	1	352	39.4	8.81	8.37	1	0	197694.1369	299512.125	251336.5845	171565.4048	398351.0408	345883.6211	NA	NA	688332.876	950527.7984	860201.5584	754979.4598	813510.4232	277390.4855	0.666666667	1	2.932726483	0.467271561	3.05E-05	4.515700161
F1LSG1	Potassium channel subfamily T member 1 OS=Rattus norvegicus OX=10116 GN=Kcnt1 PE=4 SV=2	2	1	1	1	1	1237	139.5	7.39	0	1	0	2134273.206	3326021.75	1456569.734	2430938.359	2574109.616	1907582.223	9403257.651	957582.4912	10373653.34	5876056.637	7237867.121	6634354.638	6747128.646	2304915.815	1	1	2.927277692	0.466463923	0.009034966	2.044073477
Q5RJK9	Polymerase (RNA) I polypeptide C OS=Rattus norvegicus OX=10116 GN=Polr1c PE=1 SV=1	3	1	5	1	1	346	39	5.34	9.05	1	0	122997.977	170577.9844	168033.216	146292.6946	227533.0718	NA	604021.5401	375970.6608	834580.3704	483017.7685	316798.0758	314542.845	488155.2101	167086.9888	1	0.833333333	2.921563275	0.465615297	0.007182948	2.143697278
Q63041	Alpha-1-macroglobulin OS=Rattus norvegicus OX=10116 GN=A1m PE=1 SV=1	41	51	939	51	1	1500	167	6.9	2341.34	51	0	161445487.7	177368662	102635921.1	118535658.3	201621608.5	159502609.3	331092206.5	516051548.9	479480854	504760844.5	450754007.4	405321390.6	447910142	153518324.5	1	1	2.917633081	0.465030674	3.61E-06	5.442492798
D3ZRE7	SWAP complex protein (Predicted), isoform CRA_b OS=Rattus norvegicus OX=10116 GN=Swap70 PE=1 SV=1	18	10	28	10	1	585	68.7	6.04	69.71	10	0	5505785.079	5120215.094	2874936.967	4018533.663	4075446.622	5652709.445	16275390.66	13037385.13	19402191.99	8060703.982	12020292.79	10617118.56	13235513.85	4541271.145	1	1	2.914495397	0.464563374	0.00048415	3.315020064
Q4G061	Eukaryotic translation initiation factor 3 subunit B OS=Rattus norvegicus OX=10116 GN=Eif3b PE=1 SV=1	35	21	200	21	1	797	90.9	5.08	469.24	21	0	37794295.86	13075079.75	13099587.33	12538330.94	14819147.89	11075192.11	65714855.16	40797666.03	75621022.7	20239904.59	35660931.38	58743690.52	49463011.73	17066938.98	1	1	2.898177101	0.462124921	0.006442886	2.190919553
Q6P736	Polypyrimidine tract binding protein 1, isoform CRA_a OS=Rattus norvegicus OX=10116 GN=Ptbp1 PE=1 SV=1	23	9	113	8	1	556	59.3	9.16	283.33	9	1	13862677.44	10662491.68	6764857.804	8419619.055	16391135.82	12801287.36	39815993.37	34837900.36	44205621.15	17076808.63	33894341.24	28807734.35	33106399.85	11483678.19	1	1	2.882909055	0.459830942	0.000379448	3.420847732
Q5S255	Tyrosine-protein kinase OS=Rattus norvegicus OX=10116 GN=Btk PE=2 SV=1	5	3	3	3	1	660	76.4	7.77	6.85	3	0	NA	237778.0625	125412.0838	214507.3624	270456.4069	348359.6146	NA	NA	797969.7253	937341.1922	493068.939	531148.5649	689882.1054	239302.706	0.666666667	0.833333333	2.882884681	0.45982727	0.003166	2.499489089
P62243	40S ribosomal protein S8 OS=Rattus norvegicus OX=10116 GN=Rps8 PE=1 SV=2	52	12	180	12	1	208	24.2	10.32	477.81	12	0	94103672.99	46224364.86	38119852.5	34652470.42	47273127.13	39327982.09	186904933.1	275057736	140480969.9	26218985.83	81154571.66	153048529.4	143810954.3	49950245	1	1	2.879084063	0.459254346	0.026936177	1.569664043
Q5M891	C4b-binding protein alpha chain OS=Rattus norvegicus OX=10116 GN=C4bpa PE=1 SV=1	31	16	145	16	1	601	67.2	7.78	347.53	16	0	24962512.86	6442638.828	46418106.72	7270358.793	6671909.3	7923739.986	28932905.28	43570349.95	40750199.22	49031184.63	56262305.55	68434559.07	47830250.62	16614877.75	1	1	2.87876031	0.459205506	0.004784009	2.320208012
O35397	Caspase-6 OS=Rattus norvegicus OX=10116 GN=Casp6 PE=2 SV=2	4	1	4	1	1	277	31.5	6.93	8.44	1	0	137819.4764	253110.0313	95092.03524	165958.7493	355039.2409	72118.64732	487241.7984	815033.837	444444.256	466600.3487	615358.5341	277826.2394	517750.8356	179856.3634	1	1	2.878690672	0.459195001	0.002797156	2.553283312
A0A0G2K872	Cell adhesion molecule 3 OS=Rattus norvegicus OX=10116 GN=Cadm3 PE=1 SV=1	6	2	5	2	1	430	46.6	5.21	3.28	2	0	359703.8403	279033.9375	814694.1685	596183.4645	NA	544097.7175	408970.9447	NA	2351172.599	1629499.246	1512453.31	1559025.444	1492224.309	518742.6257	0.833333333	0.833333333	2.876617874	0.458882175	0.017183038	1.764900049
Q01728	Sodium/calcium exchanger 1 OS=Rattus norvegicus OX=10116 GN=Slc8a1 PE=1 SV=3	2	1	6	1	1	971	108.1	5	13.84	1	0	147500.6484	253428.4063	156047.3527	145615.3258	234751.0484	155003.4357	NA	NA	466884.3619	NA	642331.2257	459126.2487	522780.6121	182057.7029	0.5	1	2.871510537	0.458110414	0.000213555	3.670490256
P04639	Apolipoprotein A-I OS=Rattus norvegicus OX=10116 GN=Apoa1 PE=1 SV=2	64	15	244	15	1	259	30	5.74	581.16	15	0	44105640.01	35827259.35	33723325.06	37883263.75	38601281.11	35903950.05	128223006.6	61170553.51	97835880.48	69923167.06	133820653.4	154910644.3	107647317.5	37674119.89	1	1	2.857327997	0.455960097	0.001053579	2.977332894
Q5U334	Poliovirus receptor OS=Rattus norvegicus OX=10116 GN=PVR PE=1 SV=1	16	4	30	4	1	412	44.5	7.64	71.48	4	0	1073047.043	1607771.203	3038234.029	739338.1888	762923.5036	2388473.765	4157640.416	171731.7997	5920583.295	4219074.104	6349547.135	6625234.511	4573968.544	1601631.289	1	1	2.855818674	0.455730629	0.018072915	1.742971794
A0A0G2JZE7	Rho guanine nucleotide exchange factor 40 OS=Rattus norvegicus OX=10116 GN=Arhgef40 PE=1 SV=1	1	1	1	1	1	1516	165.2	5.47	1.94	1	0	48103.84721	66097.79688	33602.4084	32391.17847	67839.28461	18694.05034	173038.6641	50835.05582	75469.74798	NA	113269.0201	219733.5661	126469.2108	44454.76099	0.833333333	1	2.84489688	0.454066529	0.021298795	1.671644966
E9PTD9	Toll-like receptor 2 OS=Rattus norvegicus OX=10116 GN=Tlr2 PE=1 SV=1	3	2	6	2	1	784	89.4	6.58	6.2	2	0	76299.59615	116209.5117	73010.30671	32991.52481	166867.1691	80019.83733	66635.28826	57171.93121	286089.2311	303732.6905	488791.6387	347097.8632	258253.1072	90899.65764	1	1	2.841078986	0.453483308	0.040270719	1.395010616
D4ACF2	Tripartite motif protein 21 (Predicted), isoform CRA_a OS=Rattus norvegicus OX=10116 GN=Trim21 PE=1 SV=2	16	5	25	5	1	471	54.1	6.7	58.41	5	0	625322.4133	899894.3535	575156.6734	872524.7041	906292.0705	347930.9774	1713084.374	1290887.538	2373967.565	680948.43	2204364.944	3737652.558	2000150.901	704520.1987	1	1	2.839025631	0.453169313	0.014512903	1.838245707
Q32PY7	Nudcd3 protein OS=Rattus norvegicus OX=10116 GN=Nudcd3 PE=2 SV=1	5	1	1	1	1	299	33.1	6.27	2.51	1	0	199100.1264	214390.1875	247033.2607	193398.5501	201822.4486	230465.1306	546743.4998	114513.3888	552235.7898	808474.5795	1008489.381	NA	606091.3278	214368.284	0.833333333	1	2.827336752	0.451377539	0.018085911	1.742659611
D3ZY02	Protein-glucosylgalactosylhydroxylysine glucosidase OS=Rattus norvegicus OX=10116 GN=Pgghg PE=1 SV=3	3	1	6	1	1	697	76.9	5.31	8.39	1	0	17296.61428	36567.08203	NA	20921.89772	60253.34514	NA	NA	NA	79362.16898	123233.3076	82366.10032	96678.04117	95409.90453	33759.73479	0.666666667	0.666666667	2.826144966	0.451194435	0.004537227	2.343209492
R4I3Z7	Neutrophil cytosolic factor 2 OS=Rattus norvegicus OX=10116 GN=Ncf2 PE=2 SV=1	1	1	1	1	1	526	59.9	5.8	0	1	0	46449.54563	50787.74609	NA	NA	47483.77901	39363.77978	95711.22404	NA	198192.8094	95976.28852	NA	NA	129960.1073	46021.21263	0.5	0.666666667	2.823917491	0.450852003	0.032776846	1.484432839
Q8R5M4	Optineurin OS=Rattus norvegicus OX=10116 GN=Optn PE=1 SV=3	3	1	2	1	1	585	67	5.07	5.12	1	0	NA	NA	119341.6239	NA	229237.928	130996.7767	444341.285	531579.0034	453786.5624	366526.549	NA	NA	449058.3499	159858.7762	0.666666667	0.5	2.809094131	0.448566292	0.002068351	2.684375759
D3ZDZ1	Amyloid beta (A4) protein-binding, family B, member 1 interacting protein OS=Rattus norvegicus OX=10116 GN=Apbb1ip PE=1 SV=2	9	4	25	4	1	664	73.6	5.4	63.37	4	0	383654.5741	868332.2031	1175344.628	NA	922186.5638	883354.5077	2955490.373	NA	1908469.541	2483363.084	1426908.121	3075636.613	2369973.546	846574.4953	0.833333333	0.833333333	2.799486117	0.447078318	0.001986125	2.701993422
D4A7D3	Similar to TANK-binding kinase 1 OS=Rattus norvegicus OX=10116 GN=Tbk1 PE=1 SV=1	5	3	12	3	1	729	83.3	6.79	25.37	3	0	2751335.655	3506263.75	2222290.182	3958989.736	5685488.336	2188366.208	19550047.82	2457988.177	12791399.63	4594223.802	8570421.998	8885548.838	9474938.376	3385455.645	1	1	2.798718805	0.446959266	0.038276819	1.417064161
Q9WUD2	Transient receptor potential cation channel subfamily V member 2 OS=Rattus norvegicus OX=10116 GN=Trpv2 PE=1 SV=2	25	15	131	15	1	761	86.7	6.77	326.98	15	0	7779651.829	11725747.26	12238123.39	7756372.066	13083738.26	10414941.43	18045638.59	2152551.978	41257948.53	36716082.55	48793646.93	28658875.18	29270790.63	10499762.37	1	1	2.787757436	0.445254983	0.022964683	1.638939545
G3V878	Signal peptidase complex catalytic subunit SEC11 OS=Rattus norvegicus OX=10116 GN=Sec11c PE=1 SV=1	5	1	15	1	1	192	21.6	9.23	30.27	1	0	468643.1987	706993.5625	127926.6516	222234.4782	883567.0213	234575.903	681060.4589	1274002.77	924066.2742	1156112.953	2267807.067	1058285.07	1226889.099	440656.8025	1	1	2.784228206	0.444704829	0.011793925	1.928341638
Q5XIC1	Mannose-1-phosphate guanyltransferase alpha OS=Rattus norvegicus OX=10116 GN=Gmppa PE=2 SV=1	12	3	24	3	1	420	46.2	7.4	60.92	3	0	1039807.877	1081942	1105898.16	1076222.661	1033470.27	369523.2545	2298343.755	3427729.079	2964892.134	1847448.795	2651860.949	2695848.213	2647687.154	951144.0371	1	1	2.783686856	0.444620379	4.91E-05	4.308918508
Q66H28	Transmembrane protein 206 OS=Rattus norvegicus OX=10116 GN=Tmem206 PE=1 SV=1	2	1	5	1	1	350	40	7.42	5.68	1	0	113231.85	257478.25	36857.09486	58771.73053	210583.49	89063.91024	323366.9567	NA	386637.3776	292777.4431	463562.0264	310032.8687	355275.3345	127664.3876	0.833333333	1	2.782885198	0.444495291	0.001154815	2.937487584
A0A0G2KA88	Suppressor of glucose, autophagy-associated 1 OS=Rattus norvegicus OX=10116 GN=Soga1 PE=4 SV=1	2	2	2	2	1	1452	163.2	6.24	4	2	0	221012.6431	57863.78125	154040.7398	141297.054	78062.40656	43169.2777	431508.9388	NA	135016.1569	100644.5763	413282.3255	531592.4316	322408.8858	115907.6504	0.833333333	1	2.781601427	0.4442949	0.035523857	1.449479887
D3ZD89	N(alpha)-acetyltransferase 15, NatA auxiliary subunit OS=Rattus norvegicus OX=10116 GN=Naa15 PE=1 SV=2	10	7	18	7	1	865	100.9	7.61	30.71	7	0	4872147.633	1729309.125	1917514.145	2077185.894	2413611.751	577418.9656	6923252.635	5339523.192	7228539.641	3098159.18	5892148.594	9297031.048	6296442.382	2264531.252	1	1	2.780461685	0.444116915	0.002850936	2.545012532
O08949	Transcription initiation factor IIA subunit 1 OS=Rattus norvegicus OX=10116 GN=Gtf2a1 PE=1 SV=1	3	1	5	1	1	377	41.5	4.55	11.55	1	0	376477.1116	557230.3906	369486.2619	600400.6904	569080.0648	357927.6498	1366700.21	792900.3672	2630442.756	NA	886239.4693	876124.4228	1310481.445	471767.0282	0.833333333	1	2.777814825	0.443703291	0.026221811	1.581337317
B0BNA3	Arginyl-tRNA synthetase 2, mitochondrial OS=Rattus norvegicus OX=10116 GN=Rars2 PE=2 SV=1	2	1	2	1	1	578	65.3	8.41	4.47	1	0	22788.74909	24884.49414	10478.82399	14620.1126	14509.43333	NA	85726.56141	33610.76268	31928.75274	23051.8562	67855.6501	NA	48434.71662	17456.32263	0.833333333	0.833333333	2.774623135	0.443204003	0.036531432	1.437333303
P97569	Kallistatin OS=Rattus norvegicus OX=10116 PE=2 SV=1	24	9	88	9	1	423	48	8.53	173.93	9	0	5806805.742	5235136.156	3111339.039	4259402.836	6923086.962	4057867.221	16739502.51	7969643.669	8706145.719	14312575.69	17790136.01	16011363.57	13588227.86	4898939.659	1	1	2.773707946	0.443060731	0.000734842	3.133806029
D3ZAZ0	Eukaryotic translation initiation factor 3 subunit M OS=Rattus norvegicus OX=10116 GN=Eif3m PE=1 SV=1	35	11	91	11	1	374	42.5	5.74	232.59	11	0	7051231.981	2527114.836	3173941.067	3139464.22	3521229.465	2180649.741	9173497.683	8937528.391	15628038.73	5525194.633	7244279.848	13153530.62	9943678.318	3598938.552	1	1	2.762947512	0.441372635	0.003869615	2.412332242
G3V8C0	Dynactin subunit 5 OS=Rattus norvegicus OX=10116 GN=Dctn5 PE=1 SV=1	5	1	7	1	1	182	20.1	8.02	9.45	1	0	67711.97183	73658.59375	74711.56078	80027.33372	84588.31517	47725.38708	NA	121597.7708	170286.5788	NA	NA	297888.69	196591.0132	71403.86039	0.5	1	2.753226676	0.439841969	0.00935136	2.029125224
Q4QQT4	Serine/threonine-protein phosphatase 2A 65 kDa regulatory subunit A beta isoform OS=Rattus norvegicus OX=10116 GN=Ppp2r1b PE=2 SV=1	13	5	31	2	1	601	66	5.1	80.91	5	0	112527.5079	165704.5781	141710.8574	543212.5392	664550.4176	350884.626	904849.0195	170770.4287	1295641.386	868016.1322	1133871.381	1067337.288	906747.6059	329765.0877	1	1	2.749677391	0.439281743	0.011252964	1.948733071
P05545	Serine protease inhibitor A3K OS=Rattus norvegicus OX=10116 GN=Serpina3k PE=1 SV=3	38	17	267	3	1	416	46.5	5.44	697.89	17	9	43636325.73	26821220.97	34809308.8	33845175.48	44557230.93	40492322.81	151653049.1	22983914.11	50230200.4	142468246.2	155260133.3	93002735.68	102599713.1	37360264.12	1	1	2.746225584	0.438736209	0.018481525	1.733262196
A0A1B0GWW0	Ubiquitin protein ligase E3C (Fragment) OS=Rattus norvegicus OX=10116 GN=Ube3c PE=1 SV=1	5	4	14	4	1	962	110.4	6.68	20.85	4	0	166247.5962	228023.1719	341136.2261	484682.0945	1064224.771	582148.2949	464439.0452	2287923.371	1105537.437	1045759.113	1109689.149	1821888.571	1305872.781	477743.6924	1	1	2.733417106	0.436705908	0.018686676	1.728467944
D3ZPA7	Scavenger receptor class A, member 3 OS=Rattus norvegicus OX=10116 GN=Scara3 PE=4 SV=1	10	6	27	6	1	606	65.3	6.35	55.81	6	0	3039677.458	2161081.266	4345026.817	2938851.072	2185577.879	4031363.796	6389860.002	NA	9917384.104	7424940.538	12736312.32	6077586.277	8509216.648	3116929.715	0.833333333	1	2.729999527	0.436162572	0.001537243	2.813257476
A0A0G2JV84	Glutamic--pyruvic transaminase 2 OS=Rattus norvegicus OX=10116 GN=Gpt2 PE=1 SV=1	5	2	2	2	1	544	60.3	8.37	4.54	2	0	6429121.86	3174321.5	3660069.407	4366260.63	5392007.402	4523602.533	12387819.27	4549459.763	14414427.06	3671096.71	20648736.56	19366546.87	12506347.71	4590897.222	1	1	2.724161989	0.435232929	0.023835375	1.622778011
Q68FY4	Group specific component OS=Rattus norvegicus OX=10116 GN=Gc PE=1 SV=1	49	19	239	19	1	476	53.5	5.86	558.91	19	0	41900002.46	29458148.77	31756745.59	34149643.82	31122853.96	36712129.25	65065946.36	92948666.81	72871387.18	125006994.2	115032655	87607027.04	93088779.44	34183253.97	1	1	2.723227564	0.435083934	0.000120834	3.917810848
C6ZII9	NAD-dependent protein deacetylase OS=Rattus norvegicus OX=10116 GN=Sirt3 PE=1 SV=1	11	3	3	3	1	320	35	7.42	7.94	3	0	1626034.629	1624033.154	1595164.162	643315.1089	14046.7328	NA	3377148.897	622879.8067	2501359.254	5070846.545	3737385.284	2649307.473	2993154.543	1100518.757	1	0.833333333	2.719766949	0.434531692	0.029563133	1.529249543
G3V6N5	PQ loop repeat-containing 3 OS=Rattus norvegicus OX=10116 GN=Pqlc3 PE=4 SV=1	4	1	3	1	1	202	22.8	8.9	4.38	1	0	444319.818	525150.375	53598.10146	NA	NA	NA	NA	NA	643987.0543	899375.097	1296839.94	864004.604	926051.6739	341022.7648	0.666666667	0.5	2.715512773	0.43385185	0.033784756	1.471279213
F1LR92	Serine protease inhibitor A3M OS=Rattus norvegicus OX=10116 GN=Serpina3m PE=1 SV=3	20	6	37	5	1	419	46.8	5.66	91.06	6	0	1933403.65	1875502.484	2028329.899	1618084.145	2550564.613	1451547.644	4370613.753	4495339.469	3190347.322	7370785.211	5618380.784	6020719.508	5177697.674	1909572.073	1	1	2.711443966	0.433200634	0.000358713	3.445252884
D3ZXB1	Mitogen-activated protein kinase kinase kinase kinase OS=Rattus norvegicus OX=10116 GN=Map4k2 PE=1 SV=1	4	2	6	2	1	780	86.8	6.71	12.87	2	0	98705.46692	306428.8047	NA	73587.08418	296886.4029	38719.3398	692753.8515	NA	282684.6201	293238.1893	363690.8261	567436.9436	439960.8861	162865.4197	0.833333333	0.833333333	2.701376922	0.431585185	0.023822813	1.623006958
A0A0G2K0N6	Uncharacterized protein OS=Rattus norvegicus OX=10116 PE=1 SV=1	10	1	1	1	1	97	10.7	7.12	2.14	1	0	484484.1793	299744.6875	172689.399	286371.0827	385290.5176	NA	1124856.7	NA	740290.4562	721044.5524	NA	927459.564	878412.818	325715.9732	0.666666667	0.833333333	2.696867487	0.430859608	0.000980452	3.008573663
G3V836	Clusterin OS=Rattus norvegicus OX=10116 GN=Clu PE=1 SV=1	32	13	177	13	1	447	51.4	5.81	503.12	13	0	22924179.08	22758116.53	28068663.05	24092383.37	30585675.36	26958464.2	56151814.7	21558121.32	112128905.3	73914838.96	80347796.85	74381579.23	69747176.06	25897913.6	1	1	2.693158111	0.430261851	0.005023395	2.299002671
F1LMD9	Cyclin-G-associated kinase OS=Rattus norvegicus OX=10116 GN=Gak PE=1 SV=1	11	12	37	12	1	1305	143.6	5.73	77.56	12	0	2475721.215	2511931.07	2317512.522	3188031.862	3059941.884	2474924.271	6202109.818	4427282.334	13670831.74	4234984.62	5281934.947	9325701.424	7190474.147	2671343.804	1	1	2.691706749	0.430027743	0.013401016	1.872862274
D4A8A0	Carbamoyl-phosphate synthetase 2, aspartate transcarbamylase, and dihydroorotase OS=Rattus norvegicus OX=10116 GN=Cad PE=1 SV=2	17	29	168	26	1	2224	243.2	6.54	360.18	29	0	12930226.31	13728736.52	11688740.19	16900721.97	23213422.85	8157223.156	46133399.99	31401019.37	48607464.31	27578958.45	38081560	40981190.21	38797265.39	14436511.83	1	1	2.687440418	0.429338844	0.000106514	3.972593306
Q5I0D7	Xaa-Pro dipeptidase OS=Rattus norvegicus OX=10116 GN=Pepd PE=2 SV=1	11	4	18	4	1	492	54.7	5.95	33.83	4	0	506415.4263	1247692.594	1565706.157	1170353.899	940573.6283	508585.3823	2607682.421	1036715.544	4671312.504	2910070.418	1934107.741	2765445.812	2654222.407	989887.8479	1	1	2.681336489	0.428351318	0.00970461	2.013021913
Q63481	Ras-related protein Rab-7L1 OS=Rattus norvegicus OX=10116 GN=Rab29 PE=1 SV=1	14	2	19	1	1	204	23.1	7.77	43.87	2	0	164382.7393	208431.5313	120898.7776	150173.5732	352672.7199	171310.9237	369085.4355	564355.5659	616558.7334	310601.8973	656380.7644	601754.0719	519789.4114	194645.0441	1	1	2.670447705	0.426584078	0.000715726	3.145253206
D4ADD8	Dynactin 6 (Predicted), isoform CRA_b OS=Rattus norvegicus OX=10116 GN=Dctn6 PE=1 SV=1	7	1	1	1	1	190	20.7	6.67	2.31	1	0	NA	451619.125	245262.4316	300445.7285	107888.2059	NA	702283.7927	NA	NA	773395.1473	NA	NA	737839.47	276303.8728	0.333333333	0.666666667	2.670391343	0.426574911	0.013256391	1.877574695
M0R9B9	UBX domain-containing protein 7 OS=Rattus norvegicus OX=10116 GN=rCG_52671 PE=1 SV=2	3	1	1	1	1	490	54.8	5.16	0	1	0	231913.2566	337977.625	230840.5334	269664.8641	367584.9208	201792.311	1064005.894	534414.3213	872556.1529	NA	429580.478	743381.3143	728787.6321	273295.5851	0.833333333	1	2.66666449	0.425968378	0.002150471	2.66746641
P15205	Microtubule-associated protein 1B OS=Rattus norvegicus OX=10116 GN=Map1b PE=1 SV=3	8	13	54	12	1	2461	269.5	4.81	120.05	13	1	4348667.519	2481784.641	1780828.921	2834935.136	3208311.005	2248513.833	11085044.77	387369.3289	9875225.816	5948806.078	5648747.956	12100190.75	7507564.116	2817173.509	1	1	2.66492784	0.425685454	0.027990643	1.552987125
D3ZG88	Mammary tumor virus receptor 2, isoform CRA_a OS=Rattus norvegicus OX=10116 GN=Sssca1 PE=1 SV=1	42	4	8	4	1	199	21.3	5.12	20.47	4	0	2647906.679	1969983.516	3046608.761	231596.0223	233510.4081	NA	4733969.961	NA	4094311.903	2248919.54	6821734.271	3760621.47	4331911.429	1625921.077	0.833333333	0.833333333	2.664281489	0.425580107	0.021784719	1.661848038
A9LNM8	cGMP-dependent protein kinase OS=Rattus norvegicus OX=10116 GN=Pkg PE=2 SV=1	18	9	31	9	1	671	76.3	5.87	65.91	9	0	879583.3834	2109915.662	1701202.375	1259862.454	2345272.664	3174317.332	6113462.363	474719.9214	7948132.889	3960522.839	5576006.953	6481281.324	5092354.381	1911692.312	1	1	2.663793933	0.425500625	0.017200004	1.764471452
P37805	Transgelin-3 OS=Rattus norvegicus OX=10116 GN=Tagln3 PE=1 SV=2	18	3	25	1	1	199	22.5	7.33	58.36	3	0	55186.31084	119412.4844	18615.88811	50865.62076	107097.8725	NA	283236.8529	134915.7426	112435.0621	327017.1524	144647.6958	120188.7767	187073.5471	70235.63532	1	0.833333333	2.663513275	0.425454866	0.029823465	1.5254419
Q6MG49	Large proline-rich protein BAG6 OS=Rattus norvegicus OX=10116 GN=Bag6 PE=1 SV=2	6	4	25	4	1	1146	119.9	5.66	56.52	4	0	575243.2665	882703.2188	729028.5608	764751.4779	1584012.644	542085.3121	3206345.602	1935114.429	2264922.947	2142132.808	2019061.833	1932150.934	2249954.759	846304.08	1	1	2.658565416	0.424647351	0.000240684	3.618552779
Q8CF97	Deubiquitinating protein VCIP135 OS=Rattus norvegicus OX=10116 GN=Vcpip1 PE=1 SV=2	6	5	34	5	1	1221	134.5	7.2	82.05	5	0	975789.2507	572840.625	269526.7536	493142.6638	1255919.883	1050649.885	1866188.776	2008505.729	4079312.538	1035707.018	1081307.926	2191984.941	2043834.488	769644.8435	1	1	2.655555358	0.424155359	0.02374224	1.624478309
F1LPV0	Asparaginyl-tRNA synthetase OS=Rattus norvegicus OX=10116 GN=Nars PE=1 SV=2	24	10	54	10	1	558	64.1	5.86	144.13	10	0	4250979.74	4627275.609	2660312.475	2509858.266	9414784.922	2758323.819	5181357.854	23175206.45	12054569.14	8932120.863	11258202.51	9012886.986	11602390.63	4370255.805	1	1	2.654853892	0.424040625	0.02440928	1.612445031
A0A0G2JTX9	Derlin OS=Rattus norvegicus OX=10116 GN=Derl2 PE=1 SV=1	17	2	4	2	1	239	27.6	7.28	4.69	2	0	287481.3394	330716	286632.785	NA	NA	NA	NA	979321.4106	NA	NA	820467.0661	593511.7004	797766.7257	301610.0415	0.5	0.5	2.645027075	0.422430122	0.011737351	1.930429908
D3ZL83	FH2 domain-containing 1 OS=Rattus norvegicus OX=10116 GN=Fhdc1 PE=4 SV=2	2	1	1	1	1	1148	125.5	9.13	2.25	1	0	540582.1213	798127.875	696907.3184	736146.6072	816297.379	488476.935	1824963.598	281229.0882	1064803.697	NA	2586678.62	3213622.2	1794259.441	679423.0393	0.833333333	1	2.640857517	0.42174497	0.043801579	1.358510233
B0BNL2	Peptidyl-prolyl cis-trans isomerase OS=Rattus norvegicus OX=10116 GN=Pin1 PE=1 SV=1	12	1	12	1	1	165	18.3	8.82	21.54	1	0	137321.8314	189249.9531	NA	NA	187003.1162	63756.21622	315124.1744	300819.6627	665417.8212	263210.7445	218889.3908	521303.3568	380794.1917	144332.7792	1	0.666666667	2.638307069	0.421325341	0.032860099	1.483331132
K3W4U8	DNA helicase MCM9 OS=Rattus norvegicus OX=10116 GN=Mcm9 PE=3 SV=2	1	1	1	1	1	1128	124.5	7.24	1.82	1	0	724896.8208	414231.5313	1129352.508	567656.2335	520324.2025	500896.8181	1662612.525	NA	1889924.687	1394237.192	2553376.204	973343.9508	1694698.912	642893.019	0.833333333	1	2.636051196	0.420953841	0.003258586	2.486970813
A0A0G2K9P5	Component of oligomeric golgi complex 5 OS=Rattus norvegicus OX=10116 GN=Cog5 PE=1 SV=1	9	4	19	4	1	756	83.6	6.55	37.91	4	0	24589.12428	57831.49609	2107872.425	34303.05681	1828292.712	1566754.569	3101708.918	1500052.926	3123121.298	1408655.213	2325658.229	3321293.256	2463414.973	936607.2305	1	1	2.630147294	0.419980071	0.017301187	1.7619241
B4F775	Golgi associated PDZ and coiled-coil motif containing (Predicted) OS=Rattus norvegicus OX=10116 GN=Gopc PE=1 SV=1	6	1	6	1	1	308	34.1	6.54	13.52	1	0	252422.6928	224054.5625	111850.7808	236778.8063	311615.8979	125050.254	646722.6163	409250.7551	476820.9987	437049.5375	404772.0246	943505.5496	553020.247	210295.4991	1	1	2.629729354	0.419911054	0.003899685	2.408970472
Q6AYZ1	Tubulin alpha-1C chain OS=Rattus norvegicus OX=10116 GN=Tuba1c PE=1 SV=1	61	24	884	11	1	449	49.9	5.1	2350.06	24	17	507236135.6	581752069.3	488287060	575813814.5	818492238	480990960.8	1501501185	557940192.3	2581332662	1605656755	1146669586	1685052431	1513025469	575428713	1	1	2.629388201	0.41985471	0.006983875	2.155903542
A0A0G2JZ73	Alpha-1-antiproteinase OS=Rattus norvegicus OX=10116 GN=Serpina1 PE=1 SV=1	40	15	211	15	1	415	46.6	6.34	538.43	15	0	92405353.15	67503222.42	64170202.2	68920513.1	81869777.35	65361914.36	140391642.6	133861773.8	202117119.9	324796783.4	253518327.3	101156253.4	192640316.7	73371830.43	1	1	2.625535108	0.41921783	0.006530708	2.185039734
Q5FVM1	Transmembrane protein 231 OS=Rattus norvegicus OX=10116 GN=Tmem231 PE=2 SV=2	4	1	4	1	1	315	36.1	8.16	9.72	1	0	681799.0039	818835.1875	390009.4113	384847.7528	916911.8368	515368.8418	2318121.106	1151109.588	950094.6236	1851782.945	2362547.256	1090300.482	1620659.334	617962.0057	1	1	2.622587341	0.418729961	0.004632589	2.334176228
Q63198	Contactin-1 OS=Rattus norvegicus OX=10116 GN=Cntn1 PE=1 SV=2	1	1	1	1	1	1021	113.4	6.11	2.27	1	0	744562.6267	408534.1563	581417.0053	NA	830992.1178	677300.043	771480.7284	NA	1351155.606	3048370.565	NA	1629599.451	1700151.587	648561.1898	0.666666667	0.833333333	2.621420483	0.418536689	0.045397521	1.342967862
A0A3B0IYY4	Adiponectin b OS=Rattus norvegicus OX=10116 GN=Adib PE=4 SV=1	18	4	28	4	1	268	28.2	7.8	67.36	4	0	12953779.31	3488769.219	6239177.204	1996929.649	5098941.859	2179259.629	21601067.83	6496398.922	13774270.7	4580741.023	12297081.6	24588585.7	13889690.96	5326142.811	1	1	2.607832996	0.416279776	0.041224514	1.384844456
Q6AYC4	Macrophage-capping protein OS=Rattus norvegicus OX=10116 GN=Capg PE=1 SV=1	40	9	58	9	1	349	38.8	6.55	141.89	9	0	7440753.767	8315922.438	6181243.012	6341763.036	8387227.006	12730036.63	25831787.81	2922789.609	18736689.48	20895336.64	41663988.99	18418059.07	21411441.93	8232824.315	1	1	2.60074078	0.415097068	0.030077455	1.521758914
A1L108	Actin-related protein 2/3 complex subunit 5-like protein OS=Rattus norvegicus OX=10116 GN=Arpc5l PE=1 SV=2	16	2	12	2	1	153	17	6.8	25.11	2	0	2030787.711	1354093.875	1567947.869	3085773.838	2717389.954	2875296.437	5173782.445	5796714.598	7178809.934	3188120.669	8017764.188	6063716.055	5903151.315	2271881.614	1	1	2.598353399	0.414698219	0.000648911	3.187814864
Q6U6G5	Zinc finger CCCH domain-containing protein 15 OS=Rattus norvegicus OX=10116 GN=Zc3h15 PE=1 SV=1	16	5	12	5	1	426	48.3	5.3	30.47	5	0	984527.1285	284211.375	254440.1603	459791.947	454292.1779	142162.3858	1541642.3	1555121.372	1644050.07	569341.7713	330523.3063	1056060.868	1116123.281	429904.1958	1	1	2.596213976	0.414340483	0.024436275	1.611964996
Q5BK16	RCG26064 OS=Rattus norvegicus OX=10116 GN=Trex1 PE=1 SV=1	4	1	2	1	1	316	33.6	7.71	5.09	1	0	226513.2257	439889.2813	747445.1629	234348.0608	422126.7329	720639.0931	NA	1303809.912	703637.153	1035949.662	2065782.427	916616.8728	1205159.205	465160.2595	0.833333333	1	2.590847307	0.413441818	0.012110979	1.916820749
G3V8D5	6-phosphogluconolactonase OS=Rattus norvegicus OX=10116 GN=Pgls PE=1 SV=1	22	5	47	5	1	291	30.8	6.86	119.53	5	0	1365044.214	3099989.406	2175351.492	1355326.081	2120088.585	2344008.426	6298091.45	5727697.295	6550698.169	3861556.232	4634336.259	5194849.718	5377871.521	2076634.701	1	1	2.589705122	0.413250316	5.69E-05	4.244887734
D3ZZH6	Mitogen-activated protein kinase kinase kinase 5 OS=Rattus norvegicus OX=10116 GN=Map3k5 PE=1 SV=3	2	2	4	2	1	1379	154.3	5.81	8.96	2	0	346868.3888	428241.7813	93318.46716	369206.9191	414056.5387	457117.6505	924530.4864	NA	1632642.217	461894.9519	716522.3836	793225.8226	905763.1724	351468.2909	0.833333333	1	2.577083611	0.411128509	0.016022714	1.795263919
Q68G32	Ugt1a7c protein (Fragment) OS=Rattus norvegicus OX=10116 GN=Ugt1a7c PE=2 SV=1	15	7	77	3	1	543	60.7	8.27	158.6	7	0	5516234	5624284.75	4489563.411	4027977.431	8089605.948	4421357.798	7517005.875	12551466.55	13338797.61	18733486.74	19516519.89	11227961.05	13814206.29	5361503.89	1	1	2.576554372	0.411039312	0.001557481	2.807577243
Q6IFV0	Type I keratin KA11 OS=Rattus norvegicus OX=10116 GN=Ka11 PE=2 SV=1	6	4	28	1	1	491	52.6	5.1	57.12	4	0	NA	568679.8125	313336.4366	972873.7752	606738.9617	2228269.87	NA	2088522.378	1610127.561	2937460.972	3891340.987	1542602.858	2414010.951	937979.7713	0.833333333	0.833333333	2.573627945	0.410545764	0.029893221	1.524427287
P70617	Ninjurin-1 OS=Rattus norvegicus OX=10116 GN=Ninj1 PE=1 SV=1	9	2	27	2	1	152	16.5	6.55	66.89	2	0	1622800.305	2601985.375	1948095.902	1749550.918	3485105.723	1974550.138	3164229.3	6149297.105	8790300.096	6296231.574	5552698.847	4486388.046	5739857.495	2230348.06	1	1	2.57352545	0.410528467	0.001696071	2.770555971
P23514	Coatomer subunit beta OS=Rattus norvegicus OX=10116 GN=Copb1 PE=1 SV=1	47	35	539	35	1	953	106.9	5.96	1310.86	35	0	56616264.81	30205512.11	69644221.82	53154985.06	59347794.78	29712702.85	102809184.6	60804171.73	159061303.9	103723438.4	167425537.3	174438920.1	128043759.3	49780246.91	1	1	2.572180078	0.41030137	0.002706442	2.567601276
P07335	Creatine kinase B-type OS=Rattus norvegicus OX=10116 GN=Ckb PE=1 SV=2	45	13	183	13	1	381	42.7	5.67	466.83	13	0	16082206.79	24274347.17	7255148.785	15271016.47	32059530.16	14777765.36	69502162.93	9646768.579	56596132.49	58071279.04	40055465.81	48033286.23	46984182.51	18286669.12	1	1	2.569313318	0.409817068	0.010885527	1.963150541
A0A096P6L8	Fibronectin OS=Rattus norvegicus OX=10116 GN=Fn1 PE=1 SV=2	36	61	935	2	1	2477	272.3	5.67	2299.78	61	59	89742867.11	110818596.1	109088534.7	100473207.1	99859516.61	174359967.4	207659135.6	81312160.59	235045858.3	560973130.5	405225445	263725620.6	292323558.4	114057114.8	1	1	2.56295768	0.408741435	0.028325397	1.547823994
P62914	60S ribosomal protein L11 OS=Rattus norvegicus OX=10116 GN=Rpl11 PE=1 SV=2	23	4	70	4	1	178	20.2	9.6	163.18	4	0	52223026.19	20481410.63	24528022.16	17352342.64	24289743.24	24252394.67	76786906.77	126062969.7	109549209.2	13802457.64	28805751.51	62644645.67	69608656.75	27187823.26	1	1	2.560287968	0.408288815	0.046376502	1.333702012
F7EZ89	TBC1 domain family, member 15 OS=Rattus norvegicus OX=10116 GN=Tbc1d15 PE=1 SV=2	5	3	12	3	1	688	78.6	5.54	19.15	3	0	297647.7138	249735.375	594878.4808	295038.514	407904.9919	1030389.062	1228960.379	1736011.138	2266333.222	1206711.158	520042.0889	381375.143	1223238.855	479265.6895	1	1	2.552318853	0.406934928	0.040357617	1.394074486
Q9EPH8	Polyadenylate-binding protein 1 OS=Rattus norvegicus OX=10116 GN=Pabpc1 PE=1 SV=1	32	19	201	14	1	636	70.7	9.5	409.88	19	5	30511617.02	19121971.94	14070874.95	20498269.83	23079126.59	15461347.03	48029767.03	114872932.8	38722861.19	15568612.81	47836948.94	48140733.93	52195309.45	20457201.23	1	1	2.551439411	0.40678526	0.043758637	1.358936214
A0A0G2K617	RWD domain-containing protein 4 OS=Rattus norvegicus OX=10116 GN=Rwdd4 PE=1 SV=1	5	1	2	1	1	188	21.1	5.2	1.76	1	0	210091.1048	99766.90625	193362.0032	136704.0387	90578.20516	150187.212	179092.0556	399299.8217	461822.4416	161888.0014	395647.4695	645821.3729	373928.5271	146781.5784	1	1	2.547516734	0.406117045	0.014428383	1.840782338
F1M8D3	C-Maf-inducing protein OS=Rattus norvegicus OX=10116 GN=Cmip PE=4 SV=2	2	1	6	1	1	773	86.2	6.81	15.22	1	0	79651.98081	262282.375	430426.8181	340933.1853	274877.4175	337027.6526	497624.8542	NA	NA	1275827.758	392367.2411	763986.9614	732451.7037	287533.2382	0.666666667	1	2.547363596	0.406090938	0.028764704	1.541140091
D3ZL10	Collagen type VI alpha 6 chain OS=Rattus norvegicus OX=10116 GN=Col6a6 PE=1 SV=3	5	9	60	7	1	2264	246.6	6.71	140.18	9	0	1307461.14	1721493.762	1280467.696	2967920.323	1754299.384	1653653.524	4243023.468	1276466.783	2684076.509	8101668.965	5416595.258	5488264.407	4535015.898	1780882.638	1	1	2.546499023	0.405943514	0.021043227	1.67688766
A0A0G2JXS8	Translocon-associated protein subunit alpha OS=Rattus norvegicus OX=10116 GN=Ssr1 PE=1 SV=1	11	3	91	3	1	319	35.5	4.4	174.33	3	0	12939437.1	14093135.67	16047230.22	11789205.31	14133765.25	13134356.3	31125830.44	70064987.78	17780279.73	18670113.96	42444436.07	29058789.11	34857406.18	13689521.64	1	1	2.546283727	0.405906795	0.024155965	1.616975608
Q4V8H9	Interferon-induced protein with tetratricopeptide repeats 2 OS=Rattus norvegicus OX=10116 GN=Ifit2 PE=1 SV=1	8	3	10	3	1	464	53.9	6.49	17.14	3	0	383086.05	530452.3906	302480.4659	194705.2916	307690.2896	269631.6322	625937.6024	655372.7216	966492.191	566951.3091	758949.0112	1483756.098	842909.8222	331341.02	1	1	2.54393441	0.40550591	0.006171269	2.209625523
Q5M9F8	N-terminal kinase-like protein OS=Rattus norvegicus OX=10116 GN=Scyl1 PE=2 SV=1	2	1	5	1	1	807	89.1	6.37	11.36	1	0	235512.8075	182636.75	408191.5935	331297.7575	235896.0501	252341.3842	NA	516189.0105	677774.2647	465631.6213	764881.97	1059768.863	696849.146	274312.7238	0.833333333	1	2.540345691	0.40489282	0.002526531	2.597475369
S4VP54	MAP2K4delta OS=Rattus norvegicus OX=10116 GN=Map2k4 PE=2 SV=1	7	2	4	2	1	408	45.4	8.03	8.51	2	0	253127.3717	325351.1875	121634.0187	116281.1646	785742.5917	101887.912	947014.3452	964067.5112	393392.2053	1037419.671	401830.167	574790.3445	719752.374	284004.041	1	1	2.534303285	0.403858587	0.022414725	1.649466585
B2RZC9	Keratinocyte-associated protein 2 OS=Rattus norvegicus OX=10116 GN=Krtcap2 PE=2 SV=2	13	1	23	1	1	136	14.7	9.61	65.4	1	0	875175.1108	1075541.5	510301.8153	416842.361	1371404.907	497579.809	591369.8391	3648610.673	1227531.576	1494351.008	2567750.673	2499528.366	2004857.023	791140.9172	1	1	2.534133906	0.40382956	0.029420219	1.531354099
Q91XU1	Protein quaking OS=Rattus norvegicus OX=10116 GN=Qki PE=1 SV=2	5	1	3	1	1	341	37.6	7.96	9.12	1	0	189516.9748	232212.0313	102862.8174	138612.2293	394653.6801	209035.2366	567955.1578	NA	448584.0376	526429.3106	NA	591802.212	533692.6795	211148.8283	0.666666667	1	2.52756638	0.40270257	0.000503208	3.298252463
Q2HWF0	Formin-binding protein 1-like OS=Rattus norvegicus OX=10116 GN=Fnbp1l PE=1 SV=2	8	5	19	5	1	605	69.9	6.73	24.9	5	0	1435340.89	1836595.609	1481963.875	922901.7082	2070094.995	551371.6804	3359180.775	NA	3539501.283	6146131.666	1162043.375	3259621.084	3493295.637	1383044.793	0.833333333	1	2.525800794	0.402399095	0.021391884	1.669750965
O35276	Neuropilin-2 OS=Rattus norvegicus OX=10116 GN=Nrp2 PE=2 SV=1	4	3	10	3	1	925	103.8	5.31	25.35	3	0	485797.7725	823642.625	329542.4548	1517881.577	1217524.261	NA	926458.8419	NA	1741214.285	1903265.027	3536561.42	2935351.751	2208570.265	874877.7381	0.833333333	0.833333333	2.524433037	0.402163855	0.031217245	1.505605427
F1M277	Leucine-rich repeat-containing 25 OS=Rattus norvegicus OX=10116 GN=Lrrc25 PE=1 SV=2	11	3	28	3	1	308	33.6	6.83	49.5	3	0	1875483.262	3173043.688	3370516.267	2094102.086	3206626.037	3551481.003	7411675.721	2723863.345	9846074.645	8707748.769	9452472.634	5406266.745	7258016.977	2878542.057	1	1	2.521421203	0.401645401	0.003565259	2.447908915
A0A0G2JU66	Nuclear protein localization protein 4 homolog OS=Rattus norvegicus OX=10116 GN=Nploc4 PE=1 SV=1	12	6	21	6	1	608	68	6.49	33.33	6	0	1549630.465	1155572.164	1239908.203	1161262.293	1193258.93	1117151.187	3904261.217	2119336.26	4687112.935	3008294.765	2234547.822	2717593.539	3111857.756	1236130.54	1	1	2.517418391	0.400955401	0.001101115	2.958167321
Q7TQ77	Ac1288 OS=Rattus norvegicus OX=10116 PE=1 SV=1	11	6	34	6	1	709	80.4	6.89	91.26	6	0	1446168.188	2441195.471	1084490.685	1955538.399	3105964.092	1162066.283	9390274.924	1445200.707	5773594.676	2680598.949	3765258.934	5124563.563	4696581.959	1865903.853	1	1	2.517054644	0.400892644	0.037871822	1.421683801
Q9Z336	Dynein light chain Tctex-type 1 OS=Rattus norvegicus OX=10116 GN=Dynlt1 PE=1 SV=1	51	3	43	3	1	113	12.4	5.08	118	3	0	1170290.368	1179689.852	1798793.522	3015384.218	2146859.264	1145429.186	6707783.207	504754.7475	4402828.484	6004869.72	4713976.515	3971604.999	4384302.945	1742741.068	1	1	2.515751207	0.40066769	0.017859803	1.748123336
Q7TQ75	Microtubule-associated proteins 1A/1B light chain 3B OS=Rattus norvegicus OX=10116 GN=Map1lc3b PE=2 SV=1	3	1	1	1	1	416	45.7	7.87	2.16	1	0	63820.294	101999.7188	NA	91867.06319	166909.5115	56292.11271	154691.5961	NA	NA	219750.8935	344131.5829	249000.3275	241893.6	96177.74003	0.666666667	0.833333333	2.515068455	0.40054981	0.009413742	2.026237708
F1LXY6	Uncharacterized protein OS=Rattus norvegicus OX=10116 PE=1 SV=2	36	3	25	3	1	100	11.2	8.88	47.99	3	0	2221441.653	1764558.219	2801101.1	1676164.394	2778510.508	1818014.473	9033586.717	230582.1044	7435865.791	8940825.068	3620473.609	3525819.789	5464525.513	2176631.724	1	1	2.510542069	0.399767503	0.048905508	1.310642226
D3Z9U2	CD163 antigen (Predicted) OS=Rattus norvegicus OX=10116 GN=Cd163 PE=1 SV=1	30	25	219	25	1	1120	120.6	6.16	576.5	25	0	25644901.81	25764008.98	35178775.6	23313939.51	37591639.5	32156086.42	35273885.48	19778667.82	138774075.3	79843963.21	113327533.1	62675390.68	74945585.92	29941558.64	1	1	2.503062276	0.398471655	0.037032801	1.431413439
B0BN93	26S proteasome non-ATPase regulatory subunit 13 OS=Rattus norvegicus OX=10116 GN=Psmd13 PE=1 SV=1	47	15	77	15	1	376	42.8	5.83	177.31	15	0	7927023.32	11271669.73	9261443.417	7315197.407	22233634.48	10421349.28	18752858.82	39327672.52	40307973.38	15066950.66	30189710.2	27637097.53	28547043.85	11405052.94	1	1	2.503017215	0.398463837	0.005001829	2.30087116
Q32PX2	Aminoacyl tRNA synthase complex-interacting multifunctional protein 2 OS=Rattus norvegicus OX=10116 GN=Aimp2 PE=2 SV=1	17	3	28	3	1	320	35.4	8.31	67.67	3	0	878360.1907	1218423.918	792097.733	804215.1442	2224287.563	814217.8136	2924463.723	2342552.28	3999622.071	1785450.441	1751239.398	4038211.573	2806923.248	1121933.727	1	1	2.501861902	0.398263334	0.00563315	2.249248684
A0A0G2K5Y1	RCG20801, isoform CRA_c OS=Rattus norvegicus OX=10116 GN=Vipas39 PE=1 SV=1	4	1	2	1	1	491	56.8	7.14	5.85	1	0	NA	99785.35938	NA	182518.3995	237083.7392	NA	295366.7351	NA	370557.3146	426572.5608	NA	636349.2859	432211.4741	173129.166	0.666666667	0.5	2.496468296	0.397326055	0.038339043	1.416358732
Q6AYG5	Ethylmalonyl-CoA decarboxylase OS=Rattus norvegicus OX=10116 GN=Echdc1 PE=1 SV=1	23	5	31	5	1	299	32.6	7.03	63.87	5	0	1840338.915	1716575.439	2728786.453	3116647.133	1512511.318	1885157.496	4004238.485	5951290.687	5701661.464	6268195.938	5620065.256	4350235.809	5315947.94	2133336.126	1	1	2.491847335	0.396521431	3.80E-05	4.420216403
Q5XI80	SP100 nuclear antigen OS=Rattus norvegicus OX=10116 GN=Sp100 PE=2 SV=1	3	1	2	1	1	342	38.4	5.45	3.91	1	0	131677.1019	156931.0313	116144.013	146082.0437	98385.98493	109135.9421	162997.6968	NA	198663.3177	415513.0135	488715.7758	305345.2327	314247.0073	126392.6862	0.833333333	1	2.486275249	0.395549207	0.009231354	2.034734595
P62890	60S ribosomal protein L30 OS=Rattus norvegicus OX=10116 GN=Rpl30 PE=3 SV=2	58	5	101	5	1	115	12.8	9.63	297.55	5	0	72855098.84	34913123.23	38389793.83	31497234.54	38993386.16	38557359.39	91531949.71	232778762.3	72287354.1	37765060.64	85285452.5	113856037.9	105584102.9	42534332.67	1	1	2.48232654	0.394858911	0.048774386	1.311808189
F1LRI5	GCN1 eIF2 alpha kinase activator-like 1 OS=Rattus norvegicus OX=10116 GN=Gcn1 PE=1 SV=3	18	37	154	37	1	2671	292.9	7.3	347.36	37	0	13752646.1	13492287.75	19542715.83	11678821.01	17074850.27	12697379.18	29758487.56	47826320.13	31501925.25	28353678.98	38383058.9	43145720.27	36494865.18	14706450.02	1	1	2.48155504	0.394723912	8.76E-05	4.057495894
P68182	cAMP-dependent protein kinase catalytic subunit beta OS=Rattus norvegicus OX=10116 GN=Prkacb PE=1 SV=2	29	11	106	2	1	351	40.7	8.56	222.46	11	0	1575790.733	2084559.547	916666.3853	1187338.261	3020180.177	333653.2941	4683798.149	1020554.796	4032300.92	1704268.811	3956734.538	7225247.905	3770484.187	1519698.066	1	1	2.481074544	0.394639813	0.045550492	1.341506928
A2RUV9	Adipocyte enhancer-binding protein 1 OS=Rattus norvegicus OX=10116 GN=Aebp1 PE=2 SV=1	15	12	64	12	1	1128	128	5.2	164.6	12	0	4949755.344	2556178.984	5210318.634	5317479.99	6576231.454	3145294.006	7711017.614	NA	12406842.74	12743127.23	12633368.93	11855924.91	11470056.28	4625876.402	0.833333333	1	2.479542315	0.394371524	0.000147764	3.830431361
Q9ET50	Staufen double-stranded RNA-binding protein 1 OS=Rattus norvegicus OX=10116 GN=Stau1 PE=1 SV=1	12	4	7	4	1	495	54.8	9.52	17	4	0	590265.1651	338946.5522	267882.5021	88578.91268	363820.0852	22570.36604	743488.7116	1296446.907	551141.2691	NA	325022.0818	534963.9962	690212.5931	278677.2639	0.833333333	1	2.476745262	0.393881341	0.04377412	1.358782576
A0A0H2UI26	Metalloreductase STEAP3 OS=Rattus norvegicus OX=10116 GN=Steap3 PE=1 SV=1	6	2	5	2	1	498	55.6	9.22	11.06	2	0	679739.821	124853.4922	NA	NA	303913.4728	417888.9251	NA	1321341.605	737239.4856	NA	824335.1257	886741.2579	942414.3685	381598.9278	0.666666667	0.666666667	2.46964627	0.392634753	0.01822573	1.739315068
Q64560	Tripeptidyl-peptidase 2 OS=Rattus norvegicus OX=10116 GN=Tpp2 PE=2 SV=3	29	27	111	27	1	1249	138.2	6.38	222.27	27	0	20462976.84	12129784.87	10080870.49	9681209.37	14979964.98	15610331.08	37928618.75	36803773.12	60136425.97	16692387.92	23451423	29126781.84	34023235.1	13824189.61	1	1	2.461137764	0.391135924	0.010111163	1.995198888
F1MAC0	Interferon gamma-inducible protein 47 OS=Rattus norvegicus OX=10116 GN=Ifi47 PE=1 SV=1	16	6	28	5	1	420	47.4	5.66	55.07	6	0	1529282.327	1829591	2684454.609	1591154.076	1355839.31	1843403.36	3746418.876	871189.0847	5365786.595	3024717.527	7310892.209	6316301.291	4439217.597	1805620.78	1	1	2.458554778	0.390679889	0.023035894	1.637594929
P19939	Apolipoprotein C-I OS=Rattus norvegicus OX=10116 GN=Apoc1 PE=3 SV=1	25	4	53	4	1	88	9.9	9.09	118.01	4	0	18836772.83	14859629.5	12178561.73	8734401.122	10742032.13	15165301.93	46757298.9	20292848.68	19916433.47	21316733.64	25229975.54	64287218.2	32966751.4	13419449.87	1	1	2.456639558	0.390341441	0.028862203	1.539670523
D3ZXJ5	Elongation factor-like GTPase 1 OS=Rattus norvegicus OX=10116 GN=Efl1 PE=1 SV=2	10	7	30	7	1	1127	125.6	5.92	75.47	7	0	1490455.199	1275431.906	750420.6457	1064699.216	1681219.594	838497.6902	5206535.962	2330373.781	4318267.962	695297.2959	2358048.095	2532470.349	2906832.241	1183454.042	1	1	2.456227397	0.390268571	0.028467856	1.54564524
A0A0G2JYI0	LPS-responsive beige-like anchor protein OS=Rattus norvegicus OX=10116 GN=Lrba PE=1 SV=1	10	21	135	21	1	2783	309.3	5.74	353.34	21	0	4056865.945	5990009.223	7222655.357	5240318.807	9638611.57	8598860.407	16108406.49	9210155.733	23528563.47	13849611	22129281.84	14892857.13	16619812.61	6791220.218	1	1	2.447249843	0.388678309	0.001892538	2.722955392
B2RZB3	Eva-1 homolog B OS=Rattus norvegicus OX=10116 GN=Eva1b PE=1 SV=1	10	1	17	1	1	225	24.6	5	50.21	1	0	296680.1468	372443.5625	401217.0288	252698.8756	390620.5448	298669.6868	887674.2131	NA	385798.5173	NA	971801.9789	1035547.571	820205.5701	335388.3075	0.666666667	1	2.445540145	0.388374796	0.003910751	2.407739835
A0A0G2K7X7	Complement C7 OS=Rattus norvegicus OX=10116 GN=C7 PE=1 SV=1	30	20	166	20	1	846	93.6	7.25	379.12	20	0	19786747.81	20098608.63	19803951.25	18807341.38	23065482.2	16415909.8	27456577.89	4329188.506	50422449.43	94094380.39	59784452	51854860.61	47990318.14	19663006.84	1	1	2.440639853	0.387503699	0.045894503	1.338239329
A0A0U1RS25	UPF1, RNA helicase and ATPase OS=Rattus norvegicus OX=10116 GN=Upf1 PE=1 SV=1	28	24	107	24	1	1124	123.9	6.61	248.21	24	0	15146180.41	7336236.172	7396695.724	16541219.43	8796960.294	5997939.108	15464239.33	27045132.17	29526440.75	19142492.4	28150347.13	29800095.42	24854791.2	10202538.52	1	1	2.436137942	0.386701876	0.000757461	3.120639723
P47853	Biglycan OS=Rattus norvegicus OX=10116 GN=Bgn PE=1 SV=1	36	10	135	10	1	369	41.7	7.52	298.25	10	0	15634075.31	13276312.45	20567777.75	20218603.63	14207357.46	15019537.59	43015567.06	20108319.35	33675146.83	65047984.74	45225273.35	33670236.87	40123754.7	16487277.36	1	1	2.433619197	0.386252623	0.003750263	2.425938275
B2RYL4	Armadillo repeat containing 6 OS=Rattus norvegicus OX=10116 GN=Armc6 PE=1 SV=1	7	2	8	2	1	468	50.6	6.21	19.32	2	0	NA	389783.3945	377953.0189	265239.9315	597535.7553	507888.1627	587954.0989	NA	866133.7858	1727361.748	1097263.165	909184.5489	1037579.469	427680.0526	0.833333333	0.833333333	2.426064678	0.384902375	0.015512778	1.809310423
Q3KR59	Ubiquitin carboxyl-terminal hydrolase 10 OS=Rattus norvegicus OX=10116 GN=Usp10 PE=1 SV=1	3	2	4	2	1	794	87.3	5.17	10.01	2	0	531700.9845	371950.3594	492902.5373	555904.1191	641136.3483	243634.3101	1247771.817	1328760.432	1051123.717	454749.5618	1411223.257	1380084.792	1145618.929	472871.4431	1	1	2.422685798	0.384297093	0.001733809	2.760998747
A0A0G2K3S4	ATP-binding cassette subfamily A member 9 OS=Rattus norvegicus OX=10116 GN=Abca9 PE=1 SV=1	8	10	45	5	1	1623	183.1	7.4	83.64	10	0	989110.5577	1573500.875	1533614.325	1111586.383	1602232.595	1292927.191	2112381.153	1657440.092	4044928.691	3705394.209	4567022.203	3542162.317	3271554.777	1350495.321	1	1	2.422485088	0.384261112	0.002408048	2.61833486
A0A0G2JXT3	Farnesyl pyrophosphate synthase OS=Rattus norvegicus OX=10116 GN=Fdps PE=1 SV=1	15	5	17	5	1	420	48.6	6.57	36.07	5	0	398888.498	235103.9609	NA	430073.5739	375832.786	339100.4724	801564.4688	1240730.501	881607.8109	700869.425	670862.103	864412.273	860007.7636	355799.8582	1	0.833333333	2.417111035	0.383296601	0.000579485	3.236957801
B5DEJ5	Eefsec protein OS=Rattus norvegicus OX=10116 GN=Eefsec PE=1 SV=1	13	6	23	6	1	583	63.6	8.29	50.08	6	0	2113443.098	1897962.781	2508272.006	794875.1068	1463534.479	2227230.768	2584921.971	9034777.762	3519022.761	3397211.929	4203843.788	3763690.599	4417244.802	1834219.706	1	1	2.408241928	0.381700113	0.025102398	1.600284789
O70531	Sulfate transporter OS=Rattus norvegicus OX=10116 GN=Slc26a2 PE=2 SV=1	1	1	3	1	1	739	82	8.19	0	1	0	31543.10908	59036.55469	37494.79853	28296.51524	71382.65455	NA	125446.975	63507.29588	123200.9951	168297.1474	49686.34441	127985.6119	109687.3949	45550.72642	1	0.833333333	2.408027348	0.381661415	0.015357199	1.813687988
Q5XI26	Signal transducer and activator of transcription OS=Rattus norvegicus OX=10116 GN=Stat2 PE=1 SV=1	16	11	68	11	1	842	96.8	5.34	168.98	11	0	3891863.359	4921618.844	3446507.523	3069270.347	3899180.264	3402144.144	5554765.072	8241289.059	14314327.99	10181996.48	8408897.175	7755498.83	9076129.1	3771764.08	1	1	2.406335313	0.381356144	0.001606432	2.794137653
Q4G017	Nischarin OS=Rattus norvegicus OX=10116 GN=Nisch PE=2 SV=2	3	4	12	4	1	1502	166.4	5.38	26.67	4	0	1150064.575	884082.625	148819.6216	930779.2065	1293955.314	1187324.617	2692382.172	223025.9103	3139172.777	2289962.033	2417454.168	2690959.525	2242159.431	932504.3266	1	1	2.40444936	0.381015635	0.016219023	1.78997531
A0A0G2K4S4	DEAD-box helicase 51 OS=Rattus norvegicus OX=10116 GN=Ddx51 PE=3 SV=1	2	1	1	1	1	635	70.1	9.03	2.28	1	0	1298382.672	1177262	1030983.622	2109263.848	1029068.119	1349348.42	6477372.466	1261265.556	3801864.436	2156399.879	2683546.375	2837936.42	3203064.189	1332384.78	1	1	2.404008389	0.380935979	0.032913924	1.482620338
A0A0G2JZQ1	DEAD-box helicase 19A OS=Rattus norvegicus OX=10116 GN=Ddx19b PE=1 SV=1	17	6	20	1	1	492	55.3	8.18	50.47	6	5	1748523.029	1597280.008	1566355.614	2018309.59	2793229.478	1295025.831	4933272.75	2662363.991	6613636.904	2242658.69	4293188.72	5684020.218	4404856.879	1836453.925	1	1	2.398566508	0.379951765	0.005462797	2.262584938
Q5FVS1	Ferritin (Fragment) OS=Rattus norvegicus OX=10116 GN=Fth1 PE=2 SV=1	38	7	95	7	1	234	26.6	6.74	199.12	7	0	17163828.36	15378016.76	9123814.822	23455412.39	29770349.11	21574991.63	41203986.07	44391156.39	49673335.66	43473067.4	60849661.36	38962438.99	46425607.64	19411068.85	1	1	2.391707948	0.378708147	0.000101719	3.992597918
Q5M8B4	Ficolin (Collagen/fibrinogen domain containing) 1 OS=Rattus norvegicus OX=10116 GN=Fcna PE=1 SV=1	12	3	18	3	1	335	36.6	7.62	41.6	3	0	1378611.037	558095.375	1282012.002	452253.8818	856526.5856	894202.8552	2395219.415	2715962.774	2674867.896	545816.8472	2100681.206	2528449.907	2160166.341	903616.9561	1	1	2.390577474	0.378502823	0.006635176	2.178147553
P54645	5'-AMP-activated protein kinase catalytic subunit alpha-1 OS=Rattus norvegicus OX=10116 GN=Prkaa1 PE=1 SV=2	16	7	57	5	1	559	63.9	8.12	113.53	7	2	4723772.988	2191921.789	2028562.186	1535401.372	4859219.443	2615313.453	8508753.662	3378640.837	9623500.64	3397427.897	6952361.496	11012349.98	7145505.752	2992365.205	1	1	2.387912324	0.378018377	0.015842994	1.800162742
P05197	Elongation factor 2 OS=Rattus norvegicus OX=10116 GN=Eef2 PE=1 SV=4	56	43	806	42	1	858	95.2	6.83	2011.71	43	1	360781212.4	251291940	211983772.9	220299845	246731656.5	209528954.5	477070163.7	704305390.5	761054356.7	347176754.1	547318447.8	735550687.6	595412633.4	250102896.9	1	1	2.380670679	0.376699323	0.000688297	3.162224123
D3ZRE3	Casein kinase I isoform alpha OS=Rattus norvegicus OX=10116 GN=Csnk1a1 PE=1 SV=1	12	3	32	3	1	365	41.9	9.6	73.5	3	0	2546474.457	281607.5625	182827.2922	260034.7277	3548002.65	3513655.159	3926705.456	6574253.41	4102990.922	3377445.95	3738334.832	2868554.375	4098047.491	1722100.308	1	1	2.379679901	0.376518543	0.019904221	1.701054815
A0A0G2JYT1	ELKS/Rab6-interacting/CAST family member 1 OS=Rattus norvegicus OX=10116 GN=Erc1 PE=1 SV=1	12	11	27	11	1	1120	128.2	5.91	60.66	11	0	2835711.507	2461680.219	3277364.733	3027050.092	2214550.266	2773844.545	5696425.54	4346287.445	4485522.66	7982476.462	7013237.949	9946484.838	6578405.816	2765033.56	1	1	2.3791414	0.376420254	0.001742524	2.758821232
A0A0G2K2C2	GMP synthase [glutamine-hydrolyzing] OS=Rattus norvegicus OX=10116 GN=Gmps PE=1 SV=1	6	3	6	3	1	700	77.8	6.86	15.17	3	0	24679.17277	33387.98828	NA	NA	79610.47259	NA	44167.19587	140130.0789	104873.5169	131907.9883	126458.3643	104037.5069	108595.7752	45892.54455	1	0.5	2.366305383	0.374070792	0.032519603	1.487854765
Q4QRB0	Galactose-4-epimerase, UDP, isoform CRA_a OS=Rattus norvegicus OX=10116 GN=Gale PE=1 SV=1	11	3	14	3	1	348	38.3	6.47	26.69	3	0	854776.505	1534906.016	243613.6899	786868.1586	2132157.747	1315093.256	1487750.621	2101066.819	4138066.508	3643323.849	2372751.391	2498557.858	2706919.508	1144569.229	1	1	2.365011604	0.373833276	0.00935805	2.028814639
G3V982	Engulfment and cell motility 2 OS=Rattus norvegicus OX=10116 GN=Elmo2 PE=1 SV=1	14	8	70	4	1	732	83.7	5.95	139.88	8	0	876162.388	780037.5469	416179.4581	519238.2337	565174.2174	671144.056	837030.1728	NA	1362654.446	1019319.854	1581659.321	2734906.073	1507113.973	637989.3167	0.833333333	1	2.362287164	0.37333269	0.020763267	1.682704311
G3V843	Prothrombin OS=Rattus norvegicus OX=10116 GN=F2 PE=1 SV=1	44	23	308	23	1	617	70.3	6.71	785.57	23	0	57005820.63	62511759.27	38817721.14	38005752.31	43751007.79	53912975.58	109889839.3	144279607.3	46432362.46	110166280.6	142473576.1	141162268.9	115733989.1	49000839.45	1	1	2.361877682	0.373257402	0.001823523	2.739088755
G3V9S9	SEC24 homolog D, COPII coat complex component OS=Rattus norvegicus OX=10116 GN=Sec24d PE=1 SV=3	11	8	28	8	1	1033	112.8	7.2	71.87	8	0	2158878.338	3095040.094	1498726.988	2179559.631	3117655.736	1090588.861	5366749.741	4540320.343	7532620.342	2978931.464	5565730.834	5035671.835	5170004.093	2190074.941	1	1	2.360651682	0.373031911	0.001543958	2.811364518
P38062	Methionine aminopeptidase 2 OS=Rattus norvegicus OX=10116 GN=Metap2 PE=1 SV=2	24	8	89	8	1	478	53	6.02	150.32	8	0	10487223.67	4018198.492	6100530.027	5036903.137	3933231.62	4604397.391	16065255.4	6474314.097	13699931.98	10398183.02	14199888.13	19729256.31	13427804.82	5696747.389	1	1	2.357100272	0.372378058	0.004557162	2.341305533
Q9WV57	Macrophage-expressed gene 1 protein OS=Rattus norvegicus OX=10116 GN=Mpeg1 PE=2 SV=2	10	5	52	5	1	714	78.5	5.99	117.39	5	0	3920873.711	5109715.219	2825993.932	3041145.075	5852587.238	3799426.745	5141149.317	10211157.68	6588586.924	11748147.16	14850062.74	9310078.023	9641530.307	4091623.653	1	1	2.356406924	0.37225029	0.004303102	2.366218359
D4A1J6	Ankyrin repeat and FYVE domain-containing 1 OS=Rattus norvegicus OX=10116 GN=Ankfy1 PE=1 SV=3	29	23	169	23	1	1169	128.6	5.94	405.81	23	0	12252798.72	11372847.92	14246143.15	12686902.23	16466012.06	7599924.451	32056333.6	15496148.74	35583522.39	17592977.54	30202931.59	44656295.1	29264701.49	12437438.09	1	1	2.352952536	0.371613167	0.004847484	2.314483616
M0R735	Heterogeneous nuclear ribonucleoprotein Q OS=Rattus norvegicus OX=10116 GN=Syncrip PE=1 SV=2	27	14	87	10	1	562	62.6	7.56	183.19	14	4	10743732.46	10722212.38	6881767.805	7532001.722	9957198.575	10795117.44	26226758.9	32564667.21	27555618.86	8580840.265	16642559.77	21593031.47	22193912.75	9438671.731	1	1	2.351380934	0.371322992	0.005164084	2.287006702
Q3SWS8	mRNA export factor OS=Rattus norvegicus OX=10116 GN=Rae1 PE=1 SV=1	4	1	2	1	1	368	40.9	7.85	5.07	1	0	NA	190225.3438	324995.0233	NA	NA	NA	642041.1442	NA	567378.7962	606155.7155	NA	NA	605191.8853	257610.1836	0.5	0.333333333	2.349254509	0.370930069	0.009045242	2.043579809
P29534	Vascular cell adhesion protein 1 OS=Rattus norvegicus OX=10116 GN=Vcam1 PE=2 SV=1	29	15	72	15	1	739	81.2	5.24	158.12	15	0	8008094.399	9263807.367	10661249.48	8261799.587	12032520.19	13426708.15	23703011.23	1285567.503	36963216.03	18688089.77	37941701.42	25870022.57	24075268.09	10275696.53	1	1	2.34293296	0.369759862	0.032889828	1.482938398
D4A2D3	MYC-binding protein 2, E3 ubiquitin protein ligase OS=Rattus norvegicus OX=10116 GN=Mycbp2 PE=1 SV=3	1	2	5	2	1	4538	498.6	7.09	10.52	2	0	128428.0785	109415.6953	91663.19795	94936.52974	153765.6509	68799.46839	243926.3504	98484.31494	NA	239647.8299	358056.5386	320111.8178	252045.3703	107834.7701	0.833333333	1	2.337329324	0.368719908	0.007874324	2.10378672
D4A7I8	Sulfatase modifying factor 1 (Predicted) OS=Rattus norvegicus OX=10116 GN=Sumf1 PE=1 SV=1	7	2	5	2	1	372	40.1	6.32	13.33	2	0	630866.5605	587512.125	703766.98	613710.1904	667768.3816	817238.7998	1666375.955	2150427.099	781683.0425	972256.7199	2484177.953	1318975.129	1562315.983	670143.8396	1	1	2.3313144	0.367600846	0.008687492	2.061105582
F1LZX7	60S ribosomal protein L17 OS=Rattus norvegicus OX=10116 GN=Rpl17 PE=1 SV=2	38	7	112	7	1	204	23.5	10.17	277.49	7	0	58753953.3	28635866.69	18590524.04	30530110.48	39438201.58	31327718.65	81417333.49	135601994.6	84036293.69	28116960.26	68392161.38	84457512.99	80337042.73	34546062.46	1	1	2.325505051	0.366517287	0.012820828	1.892083926
D4A415	Abraxas 2, BRISC complex subunit OS=Rattus norvegicus OX=10116 GN=Abraxas2 PE=1 SV=3	8	3	6	3	1	424	47.9	6.06	15.2	3	0	7788841.7	1708482.875	2360897.273	8836865.842	6673788.83	4486697.226	9555849.998	8052138.154	17488064.82	3271823.35	13796841.33	21890569.17	12342547.8	5309262.291	1	1	2.324719919	0.366370637	0.041331577	1.383718024
Q6AYT1	Similar to 9230105E10Rik protein OS=Rattus norvegicus OX=10116 GN=Trim5 PE=1 SV=1	11	5	16	5	1	511	59	6.33	34.48	5	0	1920731.566	1267678.555	2681420.12	1379335.503	1511194.4	883133.0625	3254972.29	1921606.643	5420869.505	2091852.461	4380982.539	5337365.074	3734608.085	1607248.868	1	1	2.323602872	0.366161905	0.010980414	1.959381285
A0A0G2JX01	Tetratricopeptide repeat domain 7A OS=Rattus norvegicus OX=10116 GN=Ttc7a PE=1 SV=1	2	1	5	1	1	859	96.1	6.25	10.98	1	0	34942.27873	97992.32031	NA	NA	114259.6565	NA	165803.7809	202213.5281	94426.79904	229828.6365	283310.5697	172093.9887	191279.5505	82398.08517	1	0.5	2.321407713	0.365751423	0.033880308	1.47005265
Q794E4	Heterogeneous nuclear ribonucleoprotein F OS=Rattus norvegicus OX=10116 GN=Hnrnpf PE=1 SV=3	32	10	92	8	1	415	45.7	5.49	199.09	10	2	8169974.349	11844281.65	10138026.42	11258570.34	13941449.67	17994082.4	27657315.57	49030542.36	28070675.65	18290383.33	26098868.95	21021403.86	28361531.62	12224397.47	1	1	2.320076036	0.365502218	0.005954289	2.22517009
O08623	Sequestosome-1 OS=Rattus norvegicus OX=10116 GN=Sqstm1 PE=1 SV=1	21	5	33	5	1	439	47.7	5.17	77.6	5	0	661610.5148	507815.2969	715074.1219	738354.9659	675638.2898	608340.3024	1481822.919	1044207.439	2221183.144	1062869.898	1388609.458	1829295.806	1504664.777	651138.9153	1	1	2.310819922	0.363766103	0.001126561	2.948245288
F1LR02	Collagen type XVIII alpha 1 chain OS=Rattus norvegicus OX=10116 GN=Col18a1 PE=1 SV=2	11	11	83	11	1	1311	134.6	6.29	169.91	11	0	16325447.6	9530670.281	6182481.116	9838025.269	7763291.675	5971843.041	18272439.19	10761084.43	33994831.94	20342691.11	20689621.74	24004269.56	21344156.33	9268626.497	1	1	2.302839189	0.362263612	0.005998361	2.221967401
F1LX81	Schlafen family member 5 OS=Rattus norvegicus OX=10116 GN=Slfn5 PE=1 SV=3	3	2	18	2	1	884	101.1	6.65	27.22	2	0	383861.9041	741635.9375	362828.9763	667520.1579	907210.1044	391467.3788	1447775.712	304077.4189	1747130.714	1605445.386	1264353.975	1566111.984	1322482.532	575754.0765	1	1	2.296957305	0.361152923	0.009559542	2.019562914
F1M3L7	Epidermal growth factor receptor kinase substrate 8 OS=Rattus norvegicus OX=10116 GN=Eps8 PE=1 SV=2	2	1	9	1	1	822	91.9	7.62	22.73	1	0	102053.8235	187599.9688	76724.97071	121765.8771	207949.629	151574.8367	344716.5482	NA	NA	257683.3977	314339.8158	377919.4353	323664.7992	141278.1843	0.666666667	1	2.290975077	0.360020365	0.000530474	3.275335897
D3ZD23	ATP-binding cassette subfamily E member 1 OS=Rattus norvegicus OX=10116 GN=Abce1 PE=1 SV=1	31	14	118	14	1	599	67.3	8.34	282.63	14	0	15952501.38	8277487.516	9044217.991	9921212.032	10021848.8	8122562.331	37157778.43	25156344.96	26473300.28	6830408.19	16519902.02	28280326.07	23403009.99	10223305.01	1	1	2.28918241	0.3596804	0.014002639	1.853790108
Q1JU68	Eukaryotic translation initiation factor 3 subunit A OS=Rattus norvegicus OX=10116 GN=Eif3a PE=2 SV=2	33	42	320	42	1	1354	163.1	6.77	709.73	42	0	107014882.5	32363048.11	53894305.78	40833782.95	36533569.29	31541174.29	144551769.3	130025882.2	159725148.2	45770482.13	75738360.92	135560042.9	115228614.3	50363460.49	1	1	2.287940764	0.359444776	0.013376084	1.873671013
Q5FVQ6	Interferon-gamma-inducible GTPase Ifgga3 protein OS=Rattus norvegicus OX=10116 GN=MGC108823 PE=1 SV=1	23	7	49	2	1	417	48.2	6.19	122.43	7	0	207438.8899	314760.8125	161864.9942	175177.337	141303.6789	NA	284140.0003	327264.4319	393079.5839	241407.3429	730034.9229	770346.5906	457712.1454	200109.1425	1	0.833333333	2.287312512	0.359325506	0.041562544	1.381297878
P04961	Proliferating cell nuclear antigen OS=Rattus norvegicus OX=10116 GN=Pcna PE=1 SV=1	22	4	14	4	1	261	28.7	4.69	32.16	4	0	315517.5311	647726.0781	3718215.226	1601441.483	221593.1606	2298017.511	4391099.563	2101248.05	2949773.427	2892104.398	3987136.414	3805820.182	3354530.339	1467085.165	1	1	2.28652734	0.359176399	0.01659469	1.780030856
F1M779	Clathrin heavy chain OS=Rattus norvegicus OX=10116 GN=Cltc PE=1 SV=1	50	83	1992	83	1	1675	191.4	5.69	5339.28	83	0	622283579.9	679220540.9	704647242.2	683895844.6	964252102.5	558827134	1572124388	438685359.4	2434308298	1163655779	1871000829	2150017181	1604965306	702187740.7	1	1	2.285664093	0.359012406	0.013236823	1.878216238
P51556	Diacylglycerol kinase alpha OS=Rattus norvegicus OX=10116 GN=Dgka PE=2 SV=1	3	1	13	1	1	727	82.1	6.42	21.94	1	0	56951.17751	67368.15625	29765.24445	45068.02782	149393.3225	NA	NA	51158.19661	201333.1523	213967.4588	135541.3044	193771.3248	159154.2874	69709.1857	0.833333333	0.833333333	2.283117867	0.358528333	0.04070011	1.390404417
A0A0G2JT50	Growth arrest-specific protein 7 OS=Rattus norvegicus OX=10116 GN=Gas7 PE=4 SV=1	11	3	3	3	1	423	48.4	8	8.46	3	0	558301.7896	389623.875	283467.7614	246504.7833	260637.0691	197237.6285	412031.8636	NA	903078.8522	588428.7169	713059.1444	1053561.005	734031.9165	322628.8178	0.833333333	1	2.27515918	0.357011787	0.006932019	2.159140256
A0A0G2K9I6	Ceruloplasmin OS=Rattus norvegicus OX=10116 GN=Cp PE=1 SV=1	40	39	666	39	1	1084	123.6	5.68	1636.3	39	0	142087684.6	216258904	148046855	143105934.7	159444069.4	179348430.4	324083199.3	136523480.2	662900661	382205334	354766359.4	386016763.4	374415966.2	164715313	1	1	2.273109642	0.356620384	0.01346177	1.870897834
O35550	Rab GTPase-binding effector protein 1 OS=Rattus norvegicus OX=10116 GN=Rabep1 PE=1 SV=1	13	8	20	8	1	862	99.4	5.01	58.3	8	0	988251.328	2207783.402	1008884.505	583368.3328	2824534.597	1417258.694	4341225.156	3529467.677	2711705.048	3008906.754	2607646.083	4290557.799	3414918.086	1505013.477	1	1	2.269028244	0.355839902	0.002192823	2.658996422
G3V8Q1	Coatomer subunit epsilon OS=Rattus norvegicus OX=10116 GN=Cope PE=1 SV=3	31	7	59	7	1	308	34.6	5.12	148.16	7	0	2000299.546	1771126.211	5534505.175	5045867.6	4743307.317	1260548.995	5762727.229	5324781.889	6486400.388	7694232.601	9153091.6	11702222.22	7687242.655	3392609.141	1	1	2.26587925	0.355236762	0.006526815	2.185298697
Q6P3V8	Eukaryotic translation initiation factor 4A1 OS=Rattus norvegicus OX=10116 GN=Eif4a1 PE=1 SV=1	53	21	384	11	1	406	46.1	5.48	898.47	21	9	117887806.6	86621845.17	84480624.13	85580827.33	86702254.8	82826370.26	193835710.7	311525308.1	266001985.8	141492774.1	167653309.8	150862205.4	205228549	90683288.05	1	1	2.263135285	0.354710516	0.002468941	2.607489288
B1WC02	CTP synthase OS=Rattus norvegicus OX=10116 GN=Ctps1 PE=1 SV=1	16	8	40	7	1	591	66.6	6.58	86.04	8	1	4599068.994	4503191.969	1696927.351	2985030.443	6851232.742	1592539.416	8034170.002	741954.6632	11982180.84	5230983.121	13096405.98	11199021.25	8380785.976	3704665.152	1	1	2.26222496	0.35453579	0.049827874	1.302527642
B5DFH2	BPY2 interacting protein 1 (Predicted), isoform CRA_b OS=Rattus norvegicus OX=10116 GN=Map1s PE=2 SV=1	11	8	39	8	1	972	102.7	7.11	79.94	8	0	3158605.645	1707718.484	1921172.037	1923142.106	1898476.012	2332120.585	6791257.368	1258234.972	7945712.046	3180304.078	3325456.688	6671065.914	4862005.178	2156872.478	1	1	2.254192228	0.352990948	0.033318071	1.477320151
Q6JE36	Protein NDRG1 OS=Rattus norvegicus OX=10116 GN=Ndrg1 PE=1 SV=1	16	4	14	4	1	394	42.9	6.19	38.46	4	0	3238244.764	3967624.484	6860459.012	5189304.615	4194179.138	3074480.621	12732656.13	16140872.79	15061819.42	5863788.685	5113506.303	4833382.558	9957670.982	4420715.439	1	1	2.252502139	0.352665212	0.032053269	1.494127672
G3V943	Dynein, axonemal, assembly factor 5 OS=Rattus norvegicus OX=10116 GN=Dnaaf5 PE=1 SV=1	6	4	10	4	1	851	93.7	6.13	15.52	4	0	482597.0193	551732.6445	634654.3562	647634.2911	1042554.785	276492.3616	1378900.116	574079.3045	2253463.247	1373227.23	1383234.405	1217397.073	1363383.563	605944.2429	1	1	2.250014879	0.35218539	0.010696097	1.970774667
A0A096MIV5	ATP-binding cassette subfamily F member 2 OS=Rattus norvegicus OX=10116 GN=Abcf2 PE=1 SV=1	12	6	34	6	1	627	71.6	7.14	86.11	6	0	3788675.523	990104.2188	2146990.523	67700.67207	2406433.161	1897288.119	4593341.431	3448457.114	3544909.381	1922645.335	6076959.579	5760235.782	4224424.77	1882865.37	1	1	2.243614885	0.350948313	0.017471275	1.7576754
F1M7S0	Membrane-associated guanylate kinase, WW and PDZ domain-containing protein 3 OS=Rattus norvegicus OX=10116 GN=Magi3 PE=1 SV=1	2	2	8	2	1	1470	160.5	8.13	18.17	2	0	71765.45522	111646.5078	62253.77619	74313.10676	157908.2246	36767.36767	218310.3183	NA	115029.7979	257819.9878	172768.2683	196614.0352	192108.4815	85775.7397	0.833333333	1	2.239659864	0.350182067	0.005076881	2.294403016
A0A0G2JXT6	Myotubularin-related protein 6 OS=Rattus norvegicus OX=10116 GN=Mtmr6 PE=1 SV=1	13	6	22	6	1	655	75.5	7.93	49.57	6	0	1454183.749	1344528.281	953836.2843	1214609.114	1764512.667	924593.7546	4448496.493	2148189.86	4388032.423	932563.6201	2066339.988	3157237.626	2856810.002	1276043.975	1	1	2.238802155	0.350015716	0.022419021	1.649383356
D3ZPW7	Glutathione peroxidase OS=Rattus norvegicus OX=10116 GN=Gpx8 PE=3 SV=1	5	1	1	1	1	209	24.1	9.35	2.54	1	0	535714.3585	604114	473577.8789	731906.2735	NA	577143.062	935028.3604	107333.3733	1439485.453	1474617.924	1932050.136	1959143.205	1307943.075	584491.1146	1	0.833333333	2.237746721	0.349810929	0.048737	1.312141207
F1LM60	ArfGAP with RhoGAP domain, ankyrin repeat and PH domain 1 OS=Rattus norvegicus OX=10116 GN=Arap1 PE=1 SV=1	9	8	66	8	1	1443	161	6.13	127.12	8	0	3063205.608	2998802.367	3436514.351	2124669.274	2827751.812	1526290.007	6067069.146	1318173.277	6015737.368	4350840.8	6874365.232	11114121.09	5956717.82	2662872.237	1	1	2.236952167	0.349656698	0.034002815	1.468485127
A0A0G2JUS5	Dolichyl pyrophosphate phosphatase 1 (Predicted), isoform CRA_b OS=Rattus norvegicus OX=10116 GN=Dolpp1 PE=1 SV=1	3	1	2	1	1	238	27.1	9.44	0	1	0	45373.28145	69947.35938	38838.72009	36952.33455	52064.92674	35183.33829	NA	115595.9426	NA	118621.8225	100968.8061	79913.12556	103774.9242	46393.32675	0.666666667	1	2.236850243	0.349636909	0.000349423	3.456648512
B5DEN5	Eukaryotic translation elongation factor 1 beta 2 OS=Rattus norvegicus OX=10116 GN=Eef1b2 PE=1 SV=1	39	5	54	5	1	225	24.7	4.72	154.59	5	0	5572925.159	8237637.688	7621085.868	7485974.214	10417459.67	5714522.189	16341797.62	27533506.47	11584783.81	10882891.81	18948267.62	15464651.95	16792649.88	7508267.465	1	1	2.236554566	0.349579498	0.004881505	2.311446262
Q6MG08	ATP-binding cassette sub-family F member 1 OS=Rattus norvegicus OX=10116 GN=Abcf1 PE=1 SV=1	14	10	43	10	1	839	95.2	6.65	104.19	10	0	15858162.36	4711612.727	5986512.924	4447718.439	3706179.877	3883205.359	18679072	12710195.83	10270761.45	12961669.71	8499905.281	23132627.06	14375705.22	6432231.948	1	1	2.234948201	0.349267462	0.022624875	1.645413812
B1WBY1	Cul1 protein OS=Rattus norvegicus OX=10116 GN=Cul1 PE=1 SV=1	9	6	12	6	1	776	89.6	8	30.95	6	0	1668263.813	62068.61328	1269775.913	1326606.906	2479070.155	1660915.076	2980605.444	2921419.853	5395621.967	994365.4088	2342890.507	4284011.279	3153152.41	1411116.746	1	1	2.234508533	0.349182017	0.032643584	1.486202165
P50137	Transketolase OS=Rattus norvegicus OX=10116 GN=Tkt PE=1 SV=1	43	25	471	1	1	623	67.6	7.49	1234.72	25	25	118897078.9	118650525.5	71447245.14	100832389.9	127619547.7	140664710.4	224486122.7	492999304.7	229412720.4	169804810.1	226181171.4	171852509	252456106.4	113018582.9	1	1	2.233757492	0.349036022	0.01984582	1.702330952
Q9JLZ1	Glutaredoxin-3 OS=Rattus norvegicus OX=10116 GN=Glrx3 PE=1 SV=2	24	7	48	7	1	337	37.8	5.72	109.42	7	0	4243598.5	3945070.234	3928894.262	3253677.568	5212824.299	2595005.608	8124030.742	10609896.48	13177647.24	4765610.08	7674687.024	7199215.915	8591847.914	3863178.412	1	1	2.224036013	0.347141815	0.003542975	2.450631912
D3ZGN0	TBC1 domain family, member 4 OS=Rattus norvegicus OX=10116 GN=Tbc1d4 PE=1 SV=3	7	6	24	6	1	1309	147.3	7.36	64.94	6	0	1578737.289	1248697.125	2012103.664	1066253.564	1491009.342	1453330.459	4529986.868	416137.7113	4823728.242	1785672.357	2891445.047	5199384.454	3274392.447	1475021.907	1	1	2.219894112	0.346332259	0.046015585	1.337095052
G3V6T1	Coatomer subunit alpha OS=Rattus norvegicus OX=10116 GN=Copa PE=1 SV=1	52	52	672	52	1	1224	138.3	7.65	1671.61	52	0	135061261.2	114225842.8	158155018.9	113123694.2	125153597.9	70767916.43	283228733.2	176321297.2	272140535.1	133859207.9	354041338	370645901.5	265039502.2	119414555.2	1	1	2.219490762	0.346253342	0.004747141	2.323567869
A0A0G2K2C7	Ubiquitin-specific peptidase 9, X-linked OS=Rattus norvegicus OX=10116 GN=Usp9x PE=1 SV=1	15	32	138	21	1	2554	290	5.82	309.58	32	11	8507056.92	12155525.14	12730756.19	9463653.603	16635065.77	9908614.413	17328449.38	13861670.61	48456579.86	20037227.07	25333727.07	28989133.47	25667797.91	11566778.67	1	1	2.219096486	0.346176186	0.022109033	1.655430252
Q3T1J1	Eukaryotic translation initiation factor 5A-1 OS=Rattus norvegicus OX=10116 GN=Eif5a PE=1 SV=3	51	10	161	10	1	154	16.8	5.24	421.55	10	0	57318826.99	34606578.13	44653519.17	39328751.57	42524910.88	32233823.05	101550587.7	125760978.9	97675275.31	55834184.32	73682844.95	101655409.1	92693213.37	41777734.97	1	1	2.218722806	0.346103047	0.000739526	3.131046553
P21744	Insulin-like growth factor-binding protein 4 OS=Rattus norvegicus OX=10116 GN=Igfbp4 PE=1 SV=2	11	2	8	2	1	254	27.7	7.17	27.89	2	0	127709.6912	902960.4375	1029223.681	871866.209	549672.0534	166428.8826	841299.2643	2027057.727	1170289.73	365273.7298	1588307.854	2096200.567	1348071.479	607976.8258	1	1	2.217307341	0.345825895	0.043964393	1.356898919
O70436	Mothers against decapentaplegic homolog 2 OS=Rattus norvegicus OX=10116 GN=Smad2 PE=1 SV=1	5	2	9	1	1	467	52.2	6.58	19.03	2	1	418960.1141	845305.7188	686386.1593	586688.6865	584765.9619	428698.2026	1200164.807	270760.1063	2344891.567	1494185.288	1418787.645	1138447.592	1311206.167	591800.8072	1	1	2.215620782	0.34549543	0.028344222	1.547535459
A0A0G2K1F2	Acetyl-CoA carboxylase beta OS=Rattus norvegicus OX=10116 GN=Acacb PE=1 SV=1	4	6	19	2	1	2455	276.2	6.25	49.99	6	0	NA	428566.2656	388457.9602	385990.0588	380063.0753	288926.6691	805181.6027	1502803.528	1010032.833	661102.5785	509591.1769	487327.4964	829339.8692	374400.8058	1	0.833333333	2.215112405	0.345395769	0.028201858	1.549722278
D4A1Q9	Tubulin tyrosine ligase-like 12 OS=Rattus norvegicus OX=10116 GN=Ttll12 PE=1 SV=1	21	10	23	10	1	639	73.9	5.64	54.14	10	0	885382.0104	1532163.945	404285.4691	600835.5643	4121343.134	564840.5698	4165783.955	2011382.594	3303501.553	2731599.473	2139968.534	3607067.523	2993217.272	1351475.115	1	1	2.21477794	0.345330189	0.03500084	1.455921533
D3ZYU4	Cytochrome c oxidase assembly factor COX20 OS=Rattus norvegicus OX=10116 GN=Cox20 PE=1 SV=1	12	1	2	1	1	117	13.1	9.01	5.38	1	0	147077.6695	117465.3281	316944.6839	137188.5225	NA	240214.4155	NA	NA	NA	521799.5809	522862.0157	229556.8282	424739.4749	191778.1239	0.5	0.833333333	2.214744134	0.34532356	0.037037427	1.431359191
B2GV14	Taxilin alpha OS=Rattus norvegicus OX=10116 GN=Txlna PE=1 SV=1	13	5	33	5	1	557	62.5	6.58	91.98	5	0	1273273.046	861467.4063	1459079.419	1305555.186	1181985.662	595167.7593	3390895.814	1258047.728	2353804.408	1431118.877	1666574.557	4664233.486	2460779.145	1112754.746	1	1	2.211429925	0.344673182	0.036699172	1.435343734
B5DF91	ELAV-like protein 1 OS=Rattus norvegicus OX=10116 GN=Elavl1 PE=1 SV=1	13	3	12	3	1	326	36.1	9.04	26.44	3	0	1694764.971	2695920.234	686481.0784	995895.4118	2564491.457	2376812.865	6638143.772	5962931.096	5299749.829	1466381.07	2571078	2354356.687	4048773.409	1835727.67	1	1	2.205541419	0.343515218	0.042677488	1.369801151
Q3ZAV8	Enhancer of mRNA-decapping protein 4 OS=Rattus norvegicus OX=10116 GN=Edc4 PE=1 SV=1	18	18	59	18	1	1407	152.5	5.78	138.21	18	0	5092309.521	3948253.094	4684337.48	4629748.561	7682229.204	3828137.79	16712190.58	2619272.99	12929279.61	8818090.319	10223759.16	14491932.05	10965754.12	4977502.608	1	1	2.20306346	0.343027007	0.017765318	1.750427014
G3V9R9	Afamin OS=Rattus norvegicus OX=10116 GN=Afm PE=1 SV=1	35	16	91	16	1	608	69.2	6.21	206.25	16	0	19713186.23	10001383.08	8653220.116	12667627.5	13117267.8	20976525.13	33502995.46	14989502.01	29680256.19	45775312.78	29853305.51	33594176.55	31232591.42	14188201.64	1	1	2.20130727	0.342680668	0.003762152	2.424563662
G3V6H9	Nucleosome assembly protein 1-like 1 OS=Rattus norvegicus OX=10116 GN=Nap1l1 PE=1 SV=1	20	7	91	6	1	391	45.3	4.46	234.32	7	0	6165182.638	8117566.313	6787167.896	7399390.005	13711469.45	7224580.881	24063213.75	2156037.2	29764348.38	15831592.73	18882870.3	17720943.43	18069834.3	8234226.196	1	1	2.194478736	0.341331377	0.032244587	1.491543181
D4A9U6	Ubiquitin protein ligase E3 component n-recognin 2 OS=Rattus norvegicus OX=10116 GN=Ubr2 PE=1 SV=3	1	2	15	2	1	1755	199	6.16	21.43	2	0	426824.5971	851140.6328	1046094.288	462572.7184	1169963.042	909806.5457	1942314.986	1361620.068	1432360.101	916918.2351	2409104.017	2615818.638	1779689.341	811066.9707	1	1	2.194256954	0.341287483	0.008374679	2.07703183
P61212	ADP-ribosylation factor-like protein 1 OS=Rattus norvegicus OX=10116 GN=Arl1 PE=1 SV=1	19	3	18	3	1	181	20.4	5.72	30.74	3	0	1425245.211	1823413.188	2079872.259	1519167.719	1761424.055	2114862.037	2122204.065	2556718.574	6863339.758	6006278.308	3359298.935	2615638.039	3920579.613	1787330.745	1	1	2.193538954	0.341145351	0.027446013	1.561520735
F1LRL4	Similar to TBC1 domain family, member 8; BUB2-like protein 1; vascular Rab-GAP/TBC-containing (Predicted), isoform CRA_a OS=Rattus norvegicus OX=10116 GN=Tbc1d9b PE=1 SV=2	4	4	33	4	1	1262	141.8	5.29	81.41	4	0	1095179.419	1000815.313	1561465.606	1244263.91	2300597.307	758183.1636	1834288.579	1516572.693	3531433.109	3394142.227	3607095.408	3574729.936	2909710.325	1326750.786	1	1	2.193109931	0.341060402	0.005737474	2.24127927
Q68FX4	Hematopoietic cell-specific LYN substrate 1 OS=Rattus norvegicus OX=10116 GN=Hcls1 PE=1 SV=1	5	2	2	2	1	476	52.8	4.94	2.12	2	0	364563.3557	380408.6875	677843.0893	NA	601910.2728	782255.4659	1538260.42	267794.6684	1252466.462	1143934.287	2049725.615	1132913.821	1230849.212	561396.1742	1	0.833333333	2.192478803	0.340935403	0.037280728	1.428515616
A0A0G2KA38	Interferon-stimulated exonuclease gene 20 OS=Rattus norvegicus OX=10116 GN=Isg20 PE=4 SV=1	4	1	3	1	1	185	20.9	8.65	4.03	1	0	139112.9818	164008.1875	125866.0501	120679.4383	176953.4511	119189.1461	269424.6612	NA	279470.9518	330643.3067	523298.6941	140295.7728	308626.6773	140968.2092	0.833333333	1	2.189335306	0.340312281	0.01669026	1.777536898
A0A096MJ37	RCG35712, isoform CRA_e OS=Rattus norvegicus OX=10116 GN=Urgcp PE=4 SV=1	1	1	1	1	1	928	104.5	6.52	2.09	1	0	23616.00961	34457.94922	NA	NA	65121.53473	NA	102251.5405	98683.33824	124886.8952	39858.60193	101443.0886	72125.09586	89874.76005	41065.16452	1	0.5	2.188588822	0.340164177	0.040956141	1.387680971
G3V858	Exportin 6 OS=Rattus norvegicus OX=10116 GN=Xpo6 PE=1 SV=1	1	1	4	1	1	1125	128.7	6.32	8.51	1	0	58741.25101	104562.1484	85612.33206	117918.1527	94659.42499	NA	122758.1864	92186.45816	292212.1261	229753.4932	263411.9567	211169.3279	201915.2581	92298.66183	1	0.833333333	2.187629312	0.339973734	0.015307716	1.815089604
D3ZBL5	Type I inositol 3,4-bisphosphate 4-phosphatase OS=Rattus norvegicus OX=10116 GN=Inpp4a PE=1 SV=3	3	2	13	2	1	939	105.5	6.98	29.12	2	0	219462.027	210909.9844	397878.0957	287035.9465	415370.7623	212688.6631	683513.2837	221950.3371	679784.561	499185.4904	721283.1506	1007292.897	635501.6199	290557.5798	1	1	2.18717963	0.339884452	0.012277185	1.9109012
A0A140TAI1	Ubiquilin 1, isoform CRA_a OS=Rattus norvegicus OX=10116 GN=Ubqln1 PE=1 SV=1	6	2	4	1	1	582	62	4.94	10.01	2	0	257885.2125	405414.9688	NA	340362.1284	434887.9384	270126.04	698871.4606	562939.8518	696191.5095	405533.1978	1174099.162	941530.4572	746527.6065	341735.2576	1	0.833333333	2.184520297	0.339356084	0.011386699	1.943602159
F1LQ48	Heterogeneous nuclear ribonucleoprotein L OS=Rattus norvegicus OX=10116 GN=Hnrnpl PE=1 SV=2	26	10	48	10	1	623	67.9	8.47	92.5	10	0	4849401.315	4432651.859	3457875.867	4858233.969	5604386.326	5456073.986	8312052.629	6730774.287	15969015.18	15024306.07	9784207.858	6673971.948	10415721.33	4776437.22	1	1	2.180646546	0.338585278	0.007985631	2.097690762
D3ZL04	RCG47981, isoform CRA_a OS=Rattus norvegicus OX=10116 GN=Slc25a45 PE=1 SV=2	6	1	1	1	1	288	31.6	9.09	2.61	1	0	1219410.372	624110.625	548877.4934	656823.3518	497255.7757	396305.1629	1379497.323	793941.2572	1826864.609	1090121.819	1407172.595	2099094.672	1432782.046	657130.4635	1	1	2.180361626	0.33852853	0.006641912	2.177706883
Q566Q8	UPF0696 protein C11orf68 homolog OS=Rattus norvegicus OX=10116 GN=Bles03 PE=1 SV=2	4	1	1	1	1	292	31.4	6.1	2.13	1	0	148639.9628	209486.1563	135654.2609	NA	NA	NA	324883.7207	322330.2008	427576.9301	NA	NA	NA	358263.6172	164593.46	0.5	0.5	2.17665767	0.337790132	0.00951508	2.021587556
A0A0G2K0P9	Uncharacterized protein OS=Rattus norvegicus OX=10116 PE=1 SV=1	32	15	259	1	1	733	82.6	6.77	634.74	15	0	2413062.917	1167743.625	4530006.457	2728358.47	3400032.715	1426230.53	1928616.082	4173710.63	8341438.923	9381666.235	5449675.881	4657813.532	5655486.88	2610905.786	1	1	2.166101478	0.335678799	0.033852922	1.470403839
G3V918	Trifunctional purine biosynthetic protein adenosine-3 OS=Rattus norvegicus OX=10116 GN=Gart PE=1 SV=1	28	17	95	17	1	1010	107.5	6.61	253.11	17	0	5390345.813	6499084.727	5916285.888	7348371.945	10619808.68	6895519.934	18610846.99	6176057.582	26167560.64	11995296.83	14222378.49	15231859.05	15400666.6	7111569.498	1	1	2.165579146	0.335574061	0.015263007	1.816359897
Q2PQA9	Kinesin-1 heavy chain OS=Rattus norvegicus OX=10116 GN=Kif5b PE=1 SV=1	54	43	506	43	1	963	109.5	6.44	1361.73	43	0	68114554.41	61382163.62	72081994.46	65719983.61	90034757.03	56385051.47	203156520.8	39223887.57	276261887.7	98976290.39	98059968.77	174812476.2	148415171.9	68953084.1	1	1	2.15240803	0.332924604	0.048681345	1.312637431
F1M067	Solute carrier family 26 member 11 OS=Rattus norvegicus OX=10116 GN=Slc26a11 PE=1 SV=2	2	1	1	1	1	592	64.3	8.06	2.43	1	0	220530.7479	305501.7813	426364.3015	292571.5892	377832.6828	266242.949	394377.9186	882301.4889	539876.5396	NA	1054385.305	515913.1902	677370.8885	314840.6753	0.833333333	1	2.151471972	0.332735693	0.01288893	1.889783135
D4A631	Brefeldin A-inhibited guanine nucleotide-exchange protein 1 OS=Rattus norvegicus OX=10116 GN=Arfgef1 PE=1 SV=1	12	18	72	9	1	1846	207.8	5.77	166.27	18	8	8384925.384	6435578.203	11955464.06	6129233.961	11845632.38	7028471.742	9998615.965	8911584.506	21325043.17	33820260.66	15301416.63	21980988.84	18556318.3	8629884.29	1	1	2.150239525	0.332486841	0.030223774	1.519651307
Q6IRS6	Fetub protein OS=Rattus norvegicus OX=10116 GN=Fetub PE=1 SV=1	42	12	108	12	1	393	43.1	7.5	249.14	12	0	34273332.42	18885999.23	12596733.33	12935895.18	21594606.94	16334098.7	47607943.5	38747442.17	39941985.73	45340888.91	44477840.83	34525254.47	41773559.27	19436777.63	1	1	2.149201892	0.332277214	0.00016982	3.770011163
E9PSM5	72 kDa type IV collagenase OS=Rattus norvegicus OX=10116 GN=Mmp2 PE=1 SV=3	2	1	2	1	1	663	74.2	5.47	4.03	1	0	56930.26283	79690.64063	95554.86964	NA	NA	90440.18821	NA	NA	NA	NA	161158.3758	184549.3125	172853.8442	80653.99033	0.333333333	0.666666667	2.143153035	0.331053184	0.003312052	2.479902853
M0RDJ3	Interferon-induced, double-stranded RNA-activated protein kinase OS=Rattus norvegicus OX=10116 GN=Eif2ak2 PE=1 SV=2	25	11	34	11	1	513	58.2	7.44	69.2	11	0	2666461.919	1952479.305	2724739.606	2241827.297	2581440.702	2191688.242	7040129.919	8710088.269	5967727.945	826571.773	2366109.604	5851025.709	5126942.203	2393106.179	1	1	2.142379744	0.330896453	0.048250429	1.316498821
D4A7X9	Myosin IF OS=Rattus norvegicus OX=10116 GN=Myo1f PE=1 SV=1	8	8	53	3	1	1098	125.2	9.17	117.53	8	0	2669151.181	1820731.438	2420445.543	628303.0813	445772.5945	1336113.461	1909620.228	NA	3244381.444	3377939.902	4204346.391	3893205.747	3325898.742	1553419.55	0.833333333	1	2.141017694	0.330620256	0.010018601	1.999192919
Q6P7Q1	BRISC and BRCA1-A complex member 2 OS=Rattus norvegicus OX=10116 GN=Babam2 PE=1 SV=1	16	5	38	5	1	383	43.5	5.94	93.44	5	0	3258665.908	2663404.75	2656492.259	2969973.069	6016591.204	3967552.332	7187743.373	5697697.682	15119908.82	5831010.404	5689622.75	6478763.878	7667457.817	3588779.92	1	1	2.136508225	0.329704569	0.028741806	1.541485946
A0A0H2UH97	Anaphase-promoting complex subunit 5 OS=Rattus norvegicus OX=10116 GN=Anapc5 PE=1 SV=1	1	1	1	1	1	740	83.1	6.77	0	1	0	77797.2596	78695.49219	62411.86347	50514.32016	105749.4611	53715.63358	118845.1944	NA	243080.0185	127094.8959	NA	120999.3474	152504.864	71480.67168	0.666666667	1	2.133511905	0.329095071	0.014567902	1.836602989
G3V7G9	Eukaryotic translation initiation factor 3, subunit 6 interacting protein OS=Rattus norvegicus OX=10116 GN=Eif3l PE=1 SV=2	35	12	113	12	1	382	45.1	9.03	263.95	12	0	22280034.53	7340759.906	12217892.62	6839339.885	11620145.48	5725817.375	27119850.39	17752777.88	37854446.33	15411911.67	19603562.59	23083619.23	23471028.01	11003998.3	1	1	2.132954529	0.328981597	0.013508293	1.869399528
A0A1B0GWS0	PTPRF-interacting protein alpha 1 OS=Rattus norvegicus OX=10116 GN=Ppfia1 PE=1 SV=1	6	6	18	6	1	1266	142.5	6.25	41.87	6	0	2461217.534	2305651.641	1025361.168	1538234.52	2224993.178	1314141.422	6038740.576	4198541.287	4757768.372	3157248.077	2882777.609	2134077.37	3861525.548	1811599.91	1	1	2.131555387	0.328696622	0.008594798	2.065764326
Q5I0M1	Apolipoprotein H OS=Rattus norvegicus OX=10116 GN=Apoh PE=1 SV=1	51	18	426	18	1	345	38.4	8.21	1073.24	18	0	159698483.9	128821720	136670263.8	154433823.4	111385853.2	96744763.47	220413981.8	64554111.4	260482649.1	405500778.8	301588789.9	425447946.6	279664709.6	131292484.6	1	1	2.130089246	0.3283978	0.022366282	1.650406204
M0R781	Dipeptidyl peptidase 9 OS=Rattus norvegicus OX=10116 GN=Dpp9 PE=1 SV=1	2	2	14	2	1	862	98	6.57	31.95	2	0	1558828.908	290053.2813	1272373.224	1079845.924	1005964.263	1761464.238	2372120.077	1679815.998	4628883.07	2433621.485	1785151.092	1920299.254	2469981.829	1161421.64	1	1	2.126688314	0.327703845	0.024864039	1.604428322
Q925D4	Transmembrane protein 176B OS=Rattus norvegicus OX=10116 GN=Tmem176b PE=1 SV=1	15	4	21	4	1	263	28.5	8.34	52.73	4	0	1337988.109	1652227.156	2908593.315	2130833.648	1803491.401	2108392.108	1737061.869	5580318.02	4684115.328	3543623.741	4633869.097	5209378.034	4231394.348	1990254.289	1	1	2.126057143	0.327574933	0.004437419	2.352869561
Q9JJ79	Cytoplasmic dynein 2 heavy chain 1 OS=Rattus norvegicus OX=10116 GN=Dync2h1 PE=1 SV=1	1	5	14	5	1	4306	491.9	6.65	21.23	5	0	632593.8159	395961.0469	605510.5048	552132.5066	504254.9262	271763.2437	1258012.679	NA	1234714.811	765815.6797	957677.6577	1031491.941	1049542.554	493702.674	0.833333333	1	2.125859569	0.327534572	0.000439366	3.357173554
C9WPN6	Eukaryotic translation initiation factor 2 subunit 3, Y-linked OS=Rattus norvegicus OX=10116 GN=Eif2s3y PE=2 SV=2	41	16	206	2	1	472	51.1	8.4	492.21	16	0	3945316.803	2026974	2584330.503	3276572.826	3117078.738	1539822.05	5701375.433	7164685.351	5899637.301	2793910.509	4984013.202	8371719.929	5819223.621	2748349.153	1	1	2.11735238	0.325793141	0.004996565	2.301328459
G3V6W6	Proteasome 26S subunit, ATPase 6 OS=Rattus norvegicus OX=10116 GN=Psmc6 PE=1 SV=1	36	12	77	12	1	403	45.8	7.78	192.64	12	0	7858345.659	13363779.46	10873033.65	9392309.384	18090054.45	7559188.39	20773855.88	33435314.39	35237895.3	11789968.34	19101304.37	21595754.56	23655682.14	11189451.83	1	1	2.114105543	0.325126665	0.011170236	1.951937651
F1M4I4	Uncharacterized protein OS=Rattus norvegicus OX=10116 PE=1 SV=2	11	7	22	7	1	781	86	6.24	38.27	7	0	1455023.178	1044737.828	1299567.436	1317770.006	1756260.016	1124794.558	2284484.845	1223801.36	2494751.516	2394337.989	4022911.858	4476784.184	2816178.625	1333025.504	1	1	2.112621715	0.324821739	0.014787765	1.83009746
P46462	Transitional endoplasmic reticulum ATPase OS=Rattus norvegicus OX=10116 GN=Vcp PE=1 SV=3	65	44	686	44	1	806	89.3	5.26	1693.22	44	0	201872607.7	194878324	169008393.9	165038925.9	219547004.7	181362845.5	532433773.1	519489566.2	465088634.8	238848799.7	299956646.2	334978729.6	398466025	188618017	1	1	2.112555478	0.324808123	0.002128537	2.671918796
G3V7I2	Raftlin lipid raft linker 1 OS=Rattus norvegicus OX=10116 GN=Rftn1 PE=1 SV=1	21	7	30	7	1	554	61.2	6.64	67.81	7	0	1893941.468	1930841.25	1607230.781	3261903.702	2272542.575	2048585.903	5343342.571	1366359.073	6948953.019	1753672.824	5557005.529	6522563.716	4581982.788	2169174.28	1	1	2.112316576	0.324759007	0.038798595	1.411184001
F1MAF5	PCI domain-containing 2 OS=Rattus norvegicus OX=10116 GN=Pcid2 PE=1 SV=2	7	2	3	2	1	399	46.1	8.53	6.97	2	0	339346.6964	228320.4922	169264.4317	243198.5685	247073.1367	162890.0366	NA	NA	557948.8859	518376.4394	390661.4221	NA	488995.5824	231682.227	0.5	1	2.110630534	0.324412217	0.00142755	2.845408672
F1LXF5	Golgi to ER traffic protein 4 OS=Rattus norvegicus OX=10116 GN=Get4 PE=1 SV=2	8	2	10	2	1	330	36.7	5.41	21.58	2	0	247527.105	318047.2734	NA	225017.4247	653506.9926	222766.4445	642196.5285	446240.0083	795157.1331	799480.3214	736580.1548	800127.0594	703296.8676	333373.048	1	0.833333333	2.109639252	0.324208197	0.004187786	2.378015519
Q63570	26S proteasome regulatory subunit 6B OS=Rattus norvegicus OX=10116 GN=Psmc4 PE=1 SV=1	30	10	51	10	1	418	47.4	5.21	119.43	10	0	7525858.285	11898059.45	7191963.532	8910549.718	16831105.81	9180273.972	19207632.81	30565606.54	31536707.04	10474451.16	16571411.93	21404569.53	21626729.84	10256301.79	1	1	2.108628458	0.324000063	0.010963811	1.96003846
B2RZ72	Actin-related protein 2/3 complex subunit 4 OS=Rattus norvegicus OX=10116 GN=Arpc4 PE=1 SV=1	34	5	82	5	1	168	19.7	8.43	143.36	5	0	40961059.62	36973502	21242773.3	25542689.78	31024288.59	27386809.65	63451199.98	46205517.74	77681773.94	50925011.06	76238326.45	71382804.65	64314105.64	30521853.82	1	1	2.107149389	0.323695327	0.000278062	3.555858358
A0A0G2K022	Reticulocalbin-3 OS=Rattus norvegicus OX=10116 GN=Rcn3 PE=1 SV=1	33	11	120	11	1	337	38.9	4.86	269.75	11	0	13256397.54	16035794.66	23378299.91	16373503	15844051.55	15432104.67	36809808.84	1925098.389	35234878.91	43627341.68	43417402.13	50298980.3	35218918.37	16720025.22	1	1	2.106391462	0.323539086	0.027155584	1.566140853
D3ZX42	G protein-coupled receptor 21 (Predicted), isoform CRA_a OS=Rattus norvegicus OX=10116 GN=Rabgap1 PE=1 SV=1	7	6	10	6	1	1065	120.9	5.27	26.4	6	0	949280.8519	1416391.567	NA	682208.8286	1442141.245	410057.0001	1848868.336	982618.8222	2012201.092	2932798.106	2463637.73	2109945.269	2058344.893	980015.8986	1	0.833333333	2.100317858	0.322285025	0.012544098	1.901560562
Q3T1L0	Aldehyde dehydrogenase family 16 member A1 OS=Rattus norvegicus OX=10116 GN=Aldh16a1 PE=2 SV=1	19	12	91	12	1	802	85.4	6.15	250.23	12	0	12018317.15	8625618.91	7657311.802	8657294.754	11967590.71	9560860.628	16147721.68	21193529.28	29982415.5	13886752.89	17445379.71	23466632.07	20353738.52	9747832.326	1	1	2.088027147	0.319736141	0.001725791	2.7630118
D3ZUJ9	Sorting nexin 8 OS=Rattus norvegicus OX=10116 GN=Snx8 PE=4 SV=1	7	2	12	2	1	463	52.6	8.21	26.63	2	0	333347.3153	476932.0625	464688.5307	368278.6834	648684.7278	402798.9911	634117.5559	688574.3504	832809.9133	NA	1553071.964	976801.0664	937074.97	449121.7185	0.833333333	1	2.086461045	0.319410281	0.01273412	1.895031062
D3ZWQ8	Rho guanine nucleotide exchange factor 6 OS=Rattus norvegicus OX=10116 GN=Arhgef6 PE=1 SV=3	21	14	64	11	1	796	89.7	5.95	140.93	14	3	6774981.18	3988922.578	5065061.128	6144454.864	7958509.095	6032367.091	16549820.72	612003.2622	16333177.04	9098260.215	13193540.1	19026478	12468879.89	5994049.323	1	1	2.080209758	0.318107129	0.043776284	1.358761107
D4ADC7	Adhesion G protein-coupled receptor A2 OS=Rattus norvegicus OX=10116 GN=Adgra2 PE=1 SV=2	1	1	6	1	1	1336	143.3	8.38	14.31	1	0	92741.53193	174635.1094	71722.19784	84820.21991	190662.2686	69380.55926	NA	NA	183404.0827	165480.652	266198.0284	332186.4773	236817.3101	113993.6478	0.666666667	1	2.077460583	0.317532792	0.017501927	1.756914132
Q6P9V1	Tetraspanin OS=Rattus norvegicus OX=10116 GN=Cd81 PE=1 SV=1	28	4	122	4	1	236	25.9	5.52	335.3	4	0	38414583.66	57136808.55	25230688.67	25757887.8	65897616.14	39263456.68	55652638.51	46270248.3	87694090.12	91078673.31	109896033.3	131679220.1	87045150.61	41950173.58	1	1	2.074965207	0.317010819	0.012186661	1.91411527
A0A0G2JVD6	5'-AMP-activated protein kinase subunit gamma-1 OS=Rattus norvegicus OX=10116 GN=Kmt2d PE=1 SV=1	1	6	38	6	1	5840	628.4	5.87	47.78	6	0	5718550.538	5254147.875	5840328.464	5666801.635	6969330.787	5472569.139	7464904.587	16315866.47	18436711.64	8362592.813	7119255.257	14739785.98	12073186.12	5820288.073	1	1	2.074327932	0.316877415	0.012469153	1.904163046
A0A0B4J2J1	Fc fragment of IgG receptor IIIa OS=Rattus norvegicus OX=10116 GN=Fcgr3a PE=1 SV=1	15	3	21	3	1	249	28.1	8.25	43.96	3	0	715620.8263	1865366.25	820283.1822	1355210.755	1077185.622	2519343.159	3885706.931	3938881.731	1733419.399	1864599.84	3652685.851	2200050.075	2879223.971	1392168.299	1	1	2.068157976	0.315583709	0.015979888	1.796426269
A0A0G2K012	UBX domain protein 6 OS=Rattus norvegicus OX=10116 GN=Ubxn6 PE=1 SV=1	2	1	9	1	1	524	58.3	9.42	24.57	1	0	111426.1543	212994.6875	41499.03571	NA	407853.8343	92828.91422	456848.3308	NA	223153.8788	289716.5398	401367.0005	415848.4576	357386.8415	173320.5252	0.833333333	0.833333333	2.06199953	0.314288562	0.046269499	1.334705203
Q566E4	Heterogeneous nuclear ribonucleoprotein R OS=Rattus norvegicus OX=10116 GN=Hnrnpr PE=1 SV=1	12	7	51	3	1	632	70.8	8.13	97.39	7	0	1279563.839	3863191.656	868682.1885	1273587.959	1836341.832	1431592.788	2732754.931	3723211.29	3174291.106	4255287.075	4855640.623	2988717.061	3621650.348	1758826.711	1	1	2.05912858	0.313683467	0.007028829	2.153117022
Q5M7X1	Coatomer subunit beta' OS=Rattus norvegicus OX=10116 GN=Copb2 PE=2 SV=1	47	31	470	17	1	905	102.4	5.27	1116.89	31	14	72576775.18	45247048.72	106632525.8	71948282.83	83172350.15	33899489.9	126958662.4	95232967.53	142066014.6	117035816.9	189545146.3	180178590.4	141836199.7	68912745.43	1	1	2.058199812	0.313487534	0.002699972	2.56864074
Q5PPK9	EARP and GARP complex-interacting protein 1 OS=Rattus norvegicus OX=10116 GN=Eipr1 PE=1 SV=1	16	4	22	4	1	386	43.1	5.1	48.53	4	0	1606482.748	1302494.781	1413627.959	1333393.028	1140628.09	1792825.762	2392693.979	2826827.039	2367652.714	2992331.732	3790098.459	3092792.565	2910399.415	1431575.395	1	1	2.033004636	0.308138369	8.97E-05	4.047207557
Q5U2Q7	Eukaryotic peptide chain release factor subunit 1 OS=Rattus norvegicus OX=10116 GN=Etf1 PE=2 SV=3	33	13	101	13	1	437	49	5.71	208.19	13	0	27100039.18	11986751.81	17249864.55	15906813.57	17277084.86	15589705.83	28715012.06	54293927.36	27814343.72	25666690.41	31868638.03	45226240.87	35597475.41	17518376.63	1	1	2.032007654	0.307925339	0.005542687	2.256279646
D3ZXL1	RBR-type E3 ubiquitin transferase OS=Rattus norvegicus OX=10116 GN=Arih1 PE=1 SV=1	14	6	21	6	1	555	64	5.08	52.73	6	0	3431966.887	3058231.922	2460604.519	3252347.482	2369853.745	3445467.402	6391875.644	8747594.507	8701918.227	2086997.092	4730622.026	5880842.879	6089975.062	3003078.66	1	1	2.027910605	0.307048806	0.014739483	1.831517749
F1LS42	Protein kinase C OS=Rattus norvegicus OX=10116 GN=Prkcb PE=1 SV=2	14	8	45	3	1	672	76.7	6.93	79.91	8	0	1037780.837	1506409.281	1833118.276	1287746.998	1004327.959	1815570.338	2352490.822	453379.6565	4344202.268	3051824.713	3222497.552	3768766.605	2865526.936	1414158.948	1	1	2.02631178	0.306706269	0.030161343	1.520549324
Q4V7D4	Family with sequence similarity 126, member B OS=Rattus norvegicus OX=10116 GN=Fam126b PE=1 SV=1	2	1	3	1	1	456	50.8	7.74	5.33	1	0	99209.82445	193928.4844	80827.65745	104766.0363	168007.5653	84286.8748	193621.4165	370327.1371	186424.6599	NA	243630.6581	237475.7439	246295.9231	121837.7405	0.833333333	1	2.021507639	0.305675387	0.007978232	2.098093339
Q6URK4	Heterogeneous nuclear ribonucleoprotein A3 OS=Rattus norvegicus OX=10116 GN=Hnrnpa3 PE=1 SV=1	34	10	132	4	1	379	39.6	9.01	336.11	10	6	23265542.96	16646472.81	10744326.98	13692860.46	22291380.52	22647611.54	29693287.88	36027783.19	41845400.77	35796148.91	52135732.61	24199423.46	36616296.14	18214699.21	1	1	2.010260818	0.303252408	0.002232929	2.651125086
Q6P9U8	Eukaryotic translation initiation factor 3 subunit H OS=Rattus norvegicus OX=10116 GN=Eif3h PE=1 SV=1	34	10	76	10	1	352	39.9	6.67	202.05	10	0	29410488.12	13051572.19	16978831.29	11701946.89	14473857.71	16879546.14	43967755.37	28179396.62	48393956.86	24428732.77	22435754.6	38420120.57	34304286.13	17082707.05	1	1	2.008129392	0.302791693	0.007259649	2.139084377
A0A2P1EA62	ATP-binding cassette subfamily B member 11 OS=Rattus norvegicus OX=10116 GN=Abcb11 PE=2 SV=1	12	11	16	10	1	1321	146.2	7.4	33.06	11	1	2002057.704	4514308.422	3561888.495	2470091.378	2873163.063	4837626.182	7146575.154	10277904.23	3484289.741	3106352.737	6943062.37	9674002.219	6772031.075	3376522.541	1	1	2.005622943	0.302249289	0.026943281	1.569549519
A0A0G2K8H0	Caprin-1 OS=Rattus norvegicus OX=10116 GN=Caprin1 PE=1 SV=1	16	9	67	9	1	720	79.6	5.3	145.46	9	0	31506116.58	11172744.25	17202750.64	13929993.4	15685069.69	7367855.019	49322821.32	35534957.63	26329904.43	11324670.3	32928522.34	38413617.31	32309082.22	16144088.26	1	1	2.001294944	0.301311098	0.026386301	1.578621488
P02767	Transthyretin OS=Rattus norvegicus OX=10116 GN=Ttr PE=1 SV=1	47	7	110	7	1	147	15.7	6.16	303.53	7	0	65318359.07	66382000.5	56145462.25	77629301.37	72209320.93	56484063.02	150134279.3	150909756.1	58470281.94	191609292	149037695.8	88294328.62	131409272.3	65694751.19	1	1	2.000300936	0.301095338	0.008605329	2.065232521
P11497	Acetyl-CoA carboxylase 1 OS=Rattus norvegicus OX=10116 GN=Acaca PE=1 SV=1	21	38	192	34	1	2345	265	6.39	422.72	38	4	19447348.9	27475164.11	29051472.65	31422925.83	27587628.09	26039223.11	52437436.86	52101462	55775379.45	47710748.49	56166311.84	57283549.03	53579147.94	26837293.78	1	1	1.996443769	0.300257083	2.60E-07	6.585026652
D3ZZ38	Sorting nexin OS=Rattus norvegicus OX=10116 GN=Snx18 PE=1 SV=1	7	3	16	3	1	615	67.8	6.46	29.19	3	0	448037.2221	384051.8203	324005.5662	291192.3982	176351.9868	508463.4093	722730.2367	NA	844141.2156	407166.7446	804536.3101	768385.4181	709391.985	355350.4005	0.833333333	1	1.99631683	0.300229468	0.003106238	2.507765272
Q7TP51	Ab2-232 OS=Rattus norvegicus OX=10116 GN=Ube4a PE=1 SV=1	14	11	46	11	1	1085	124.3	5.24	112.42	11	0	4472385.796	4609129.938	5886448.352	4963355.637	4691474.911	2716696.313	4995095.898	17455120.45	6748817.398	5094542.772	9933612.137	10310123.07	9089551.955	4556581.825	1	1	1.994818113	0.299903303	0.043666217	1.359854431
F1LP76	Elongator complex protein 1 OS=Rattus norvegicus OX=10116 GN=Elp1 PE=1 SV=2	15	15	39	15	1	1331	149.1	6.34	88.09	15	0	6787616.528	5168000.203	5455013.358	6818476.815	9146644.4	5315519.998	17258197.38	9003556.225	18877597.33	8874935.946	9653911.687	13412492.95	12846781.92	6448545.217	1	1	1.992198471	0.299332602	0.007157887	2.145215162
W8BZ34	DDX3Y OS=Rattus norvegicus OX=10116 GN=DDX3Y PE=3 SV=1	42	24	298	4	1	658	73.3	7.75	655.52	24	20	104093774.4	52919274.55	58857227.4	47912836.36	56978512.75	59363134.19	152070566.3	145751769.3	128199029.9	75375497.91	104470968.5	150620516	126081391.3	63354126.62	1	1	1.990105429	0.298876084	0.001920438	2.716599709
D4AB03	Family with sequence similarity 120A OS=Rattus norvegicus OX=10116 GN=Fam120a PE=1 SV=2	18	17	94	17	1	1115	122.1	8.84	265.83	17	0	15860571.1	12937018.84	15766666.06	10228720.31	9012189.363	13271556.41	24271203.65	31761805.14	30413875.28	12980364.51	23153023.12	30663699.69	25540661.9	12846120.35	1	1	1.988200422	0.298460162	0.002282277	2.641631646
B5DFC8	Eukaryotic translation initiation factor 3 subunit C OS=Rattus norvegicus OX=10116 GN=Eif3c PE=1 SV=1	22	20	216	20	1	911	105.4	5.78	498.97	20	0	73896248.81	27085180.94	32050020	33840431.04	26137602.48	19014724.88	96070767.72	59404235	105495638.6	30241925.22	52743564.1	77558332.11	70252410.46	35337368.03	1	1	1.988048754	0.298427031	0.032077503	1.493799446
P63029	Translationally-controlled tumor protein OS=Rattus norvegicus OX=10116 GN=Tpt1 PE=1 SV=1	23	3	35	3	1	172	19.5	4.86	102.82	3	0	6207711.634	7306372.813	5979093.744	7224522.923	8833011.539	6322197.46	16769867.2	11552583.02	20220962.39	10575858.42	13325187.49	10691266.19	13855954.12	6978818.352	1	1	1.985429828	0.297854542	0.001871645	2.727776522
D3ZU40	Transmembrane protein 104 OS=Rattus norvegicus OX=10116 GN=Tmem104 PE=4 SV=1	2	1	1	1	1	496	55.6	6.9	2.07	1	0	NA	309047.5	444323.3676	376389.7885	572165.285	683520.8277	NA	NA	821952.4065	1248329.386	763160.2712	NA	944480.688	477089.3538	0.5	0.833333333	1.97967253	0.296593357	0.017259682	1.76296721
G3V805	EKC/KEOPS complex subunit Tprkb OS=Rattus norvegicus OX=10116 GN=Tprkb PE=1 SV=1	18	2	9	2	1	175	19.5	6.93	20.16	2	0	346581.9118	259735.4844	374012.2754	346257.2362	371337.5816	260304.5338	782625.1639	749678.5777	908301.793	526434.7928	481791.884	413934.878	643794.5149	326371.5039	1	1	1.972581881	0.29503504	0.003376628	2.471516783
Q9ER24	Ataxin-10 OS=Rattus norvegicus OX=10116 GN=Atxn10 PE=1 SV=1	20	7	17	7	1	475	53.7	5.15	39.54	7	0	1010796.499	1485261.156	849637.3442	1581300.703	2404412.114	1839889.003	1830908.774	3629275.922	3835280.747	4714885.032	2158686.946	1905383.996	3012403.569	1528549.47	1	1	1.970759618	0.294633655	0.021424229	1.669094798
D3ZII8	SET and MYND domain containing 5 (Predicted) OS=Rattus norvegicus OX=10116 GN=Smyd5 PE=1 SV=2	3	1	1	1	1	417	47	5.05	2.45	1	0	88468.44434	194098.0625	NA	NA	199685.6486	77722.14342	295004.6243	386533.4125	282877.2978	290628.4734	205460.1797	193509.7641	275668.9586	139993.5747	1	0.666666667	1.969154364	0.294279762	0.015484786	1.810094792
P07340	Sodium/potassium-transporting ATPase subunit beta-1 OS=Rattus norvegicus OX=10116 GN=Atp1b1 PE=1 SV=1	23	7	154	7	1	304	35.2	8.65	319.67	7	0	40047293.29	47754011.94	70756842.61	56099199.42	48104395.27	75096555.46	49722456.17	113744333.5	138078867	138750276.5	165798312	58372493.5	110744456.5	56309716.33	1	1	1.966702439	0.293738656	0.021515526	1.667248032
P81795	Eukaryotic translation initiation factor 2 subunit 3, X-linked OS=Rattus norvegicus OX=10116 GN=Eif2s3 PE=1 SV=2	44	17	215	3	1	472	51	8.4	504.74	17	14	74655741.48	35638259.95	54541060.43	49589528.49	54140638.81	38277129.65	95976208.57	87699471.22	106866405	58771580.69	100181328.7	152888990.6	100397330.8	51140393.13	1	1	1.963170884	0.292958104	0.005046536	2.297006624
D4A0E8	Protein arginine N-methyltransferase 5 OS=Rattus norvegicus OX=10116 GN=Prmt5 PE=1 SV=1	2	1	1	1	1	637	72.6	6.27	2.8	1	0	NA	NA	69209.66738	19427.40953	96563.43911	28140.60058	101455.7088	139441.6357	105592.9958	64825.8709	142782.5712	74017.41327	104686.0326	53335.27915	1	0.666666667	1.962791501	0.292874169	0.046097875	1.336319094
Q5PQM2	Kinesin light chain 4 OS=Rattus norvegicus OX=10116 GN=Klc4 PE=1 SV=1	22	11	60	7	1	619	68.9	6.25	154.62	11	0	1828574.103	4088668.578	3196302.021	1718212.079	5352909.154	1341355.129	5287051.683	4093801.618	9001070.925	4901349.622	4208156.089	6858685.28	5725019.203	2921003.511	1	1	1.959949443	0.292244869	0.019174666	1.717272192
D3ZU13	Eukaryotic translation initiation factor 4 gamma, 1 OS=Rattus norvegicus OX=10116 GN=Eif4g1 PE=1 SV=1	17	23	170	20	1	1598	175.6	5.38	390.3	23	3	27372325.8	16035653.88	17132676.33	16139496.93	18825937.75	21159749.35	41733867.69	53910332.78	36697904.73	18091896.78	33808466.43	44144803.51	38064545.32	19444306.67	1	1	1.957619058	0.291728184	0.00506523	2.29540083
A0A0G2JUE4	Golgin subfamily A member 4 OS=Rattus norvegicus OX=10116 GN=Golga4 PE=1 SV=1	6	12	30	12	1	2281	262.3	5.34	77.97	12	0	2142168.648	2485060.094	4061420.332	3071188.979	1072988.237	2403979.128	5919076.851	7683289.545	6357099.598	3365945.427	1993066.389	4502566.504	4970174.052	2539467.57	1	1	1.957171697	0.291628927	0.027737326	1.556935409
D3ZFA8	40S ribosomal protein S17-like OS=Rattus norvegicus OX=10116 GN=LOC100362366 PE=3 SV=1	56	6	54	6	1	135	15.5	9.77	143.06	6	0	24311877.97	14821245.28	14030517.57	12066386	15799023.41	11785543.59	23146229.85	45480623.79	30412758.7	14697772.04	28727244.79	39149593.89	30269037.18	15469098.97	1	1	1.956742098	0.291533589	0.012496847	1.903199547
F1LPS8	Transcriptional activator protein Pur-alpha OS=Rattus norvegicus OX=10116 GN=Pura PE=1 SV=3	23	5	78	5	1	289	31.9	8.59	173.77	5	0	12285243.41	10453776.58	11427135.88	7946681.487	13124834.84	12805778.03	29092287.47	25178722.44	26642147.71	6494617.531	14719097.3	30934156.17	22176838.1	11340575.04	1	1	1.9555303	0.29126455	0.021286221	1.671901433
P00762	Anionic trypsin-1 OS=Rattus norvegicus OX=10116 GN=Prss1 PE=1 SV=1	8	1	71	1	1	246	25.9	4.89	259.17	1	0	37994319.64	53406137	39321749.37	45736839.28	69436971.29	41288919.85	44042655.29	59123308.15	125442593.6	98968880.38	102054724.2	131330470.6	93493772.04	47864156.07	1	1	1.953314959	0.290772276	0.013129495	1.881751978
F1M5X2	AP complex subunit sigma OS=Rattus norvegicus OX=10116 GN=Ap4s1 PE=3 SV=1	7	1	2	1	1	144	16.9	5.19	1.93	1	0	89280.96302	104471.4922	208895.3281	175792.9908	165346.93	107207.4904	321608.6277	150301.7067	434669.5625	NA	212969.1359	265498.9302	277009.5926	141832.5324	0.833333333	1	1.953075136	0.290718951	0.021956034	1.658446105
A0A0G2JTM1	Uncharacterized protein OS=Rattus norvegicus OX=10116 PE=1 SV=1	4	3	9	3	1	706	80.2	5.96	17.34	3	0	862815.0116	1184255.531	1489573.977	1329759.527	1475987.736	1001293.235	1162767.134	1058785.329	1876928.313	2732742.235	4013343.372	3436773.195	2380223.263	1223947.503	1	1	1.944710257	0.288854905	0.045791621	1.339213982
Q3KRE8	Tubulin beta-2B chain OS=Rattus norvegicus OX=10116 GN=Tubb2b PE=1 SV=1	70	25	1249	2	1	445	49.9	4.89	3193.3	25	4	9101512.052	7960685.5	7846400.396	8821690.503	13257663.2	8189489.161	12128935.06	7127116	23180567.86	18218484.32	18220355.81	28271737.33	17857866.06	9196240.136	1	1	1.941866001	0.288219258	0.021859103	1.660367664
A0A0G2JU77	Eukaryotic translation initiation factor 3 subunit K OS=Rattus norvegicus OX=10116 GN=Eif3k PE=1 SV=1	29	4	15	4	1	215	24.8	4.97	30.56	4	0	1925647.639	1002159.5	2381433.466	1650500.54	1792162.895	810521.2198	3233805.198	4534270.321	3307842.381	2497791.02	1916023.446	3073380.95	3093852.219	1593737.544	1	1	1.941255781	0.288082762	0.006061831	2.217396176
G3V8H5	Inhibitor of kappaB kinase beta, isoform CRA_b OS=Rattus norvegicus OX=10116 GN=Ikbkb PE=1 SV=1	7	5	14	5	1	757	86.8	6.25	25.13	5	0	1925130.724	1509844.461	1736788.797	1563653.748	2449915.795	1185302.059	3356222.889	855446.0316	4614039.073	2786433.014	3338650.731	5152108.807	3350483.424	1728439.264	1	1	1.938444407	0.28745335	0.02978678	1.525976442
A0A0G2JWX1	26S proteasome non-ATPase regulatory subunit 11 OS=Rattus norvegicus OX=10116 GN=Psmd11 PE=1 SV=1	32	13	116	13	1	500	55.9	7.91	271.28	13	0	10330564.43	15038993.53	11347815.64	15811996.69	25358410.31	14608828.82	25422967.05	39228162.34	39896561.17	21212767.5	24358362.47	29062502.71	29863553.87	15416101.57	1	1	1.937166393	0.287166926	0.00407214	2.390177299
P12785	Fatty acid synthase OS=Rattus norvegicus OX=10116 GN=Fasn PE=1 SV=3	44	83	1552	83	1	2505	272.5	6.39	3973.32	83	0	209738253.3	410296388.5	309482362.2	305650474.9	433750143.3	395016836.8	628828743	282430882.7	903592144.7	961298918.4	756942724.8	461130846.5	665704043.4	343989076.5	1	1	1.935247625	0.286736543	0.016796949	1.774769596
A0A0G2K8P3	E3 ubiquitin-protein ligase OS=Rattus norvegicus OX=10116 GN=Nedd4 PE=1 SV=1	31	21	152	21	1	889	102.7	5.24	315.82	21	0	16270249.99	18110156.82	19809728.99	17885134.08	19741004.89	20114412.08	39894739.14	16144465.4	55799500.51	33151779.09	29275538.24	42212848.92	36079811.88	18655114.47	1	1	1.934043982	0.286466346	0.009931798	2.002972122
Q7TP57	Signal transducer and activator of transcription OS=Rattus norvegicus OX=10116 PE=2 SV=1	21	20	160	20	1	1165	134.5	6.95	372.08	20	0	19335478.61	25331777.11	21606395.15	20004102.67	27452598.42	23043820.59	29641200.02	27386665.53	67401084.79	51689862.33	46849219.2	41198270.8	44027717.11	22795695.43	1	1	1.931404868	0.285873322	0.006514911	2.186091513
Q6AYI5	Leucine-rich repeat protein SHOC-2 OS=Rattus norvegicus OX=10116 GN=Shoc2 PE=2 SV=1	2	1	5	1	1	582	64.9	8.46	8.85	1	0	366329.6207	345111.7188	311369.3427	332015.1097	277239.1057	282492.528	840777.4458	424744.566	735241.8388	703017.5569	501917.2017	488372.251	615678.4767	319092.9043	1	1	1.929464643	0.285436825	0.001625264	2.789076084
Q6AYD5	Eukaryotic peptide chain release factor GTP-binding subunit ERF3B-like OS=Rattus norvegicus OX=10116 GN=Gspt1 PE=1 SV=1	8	5	20	5	1	636	68.7	5.21	46.54	5	0	7519163.28	7910095.438	3590737.394	4899846.442	11566916.72	8406622.516	13248511.22	20146320.86	14873760.72	11999368.61	16986679.92	7428400.97	14113840.38	7315563.632	1	1	1.929289538	0.285397409	0.009322221	2.030480606
Q03555	Gephyrin OS=Rattus norvegicus OX=10116 GN=Gphn PE=1 SV=3	10	6	12	6	1	768	83.2	5.73	29.78	6	0	2990422.506	2426823.5	4134347.796	3500701.977	4501105.809	1980517.576	6988820.131	6310571.452	11911127.02	4046052.896	4017902.807	4389935.871	6277401.697	3255653.194	1	1	1.928154297	0.285141785	0.042384542	1.372792505
P05544	Serine protease inhibitor A3L OS=Rattus norvegicus OX=10116 GN=Serpina3l PE=1 SV=3	50	20	302	14	1	413	46.2	5.67	763.06	20	7	64614253.01	55022620.49	35701044.63	45669876.59	70887319.34	56802820.66	124770210.6	37823253.51	42903673.76	139901168.8	170148397	118055209.4	105600318.8	54782989.12	1	1	1.927611482	0.285019505	0.04754555	1.322890124
G3V7C6	Tubulin beta chain OS=Rattus norvegicus OX=10116 GN=Tubb4b PE=1 SV=2	61	27	1419	2	1	548	61.1	4.86	3622.9	27	33	525454935.7	516409057.7	531519143.4	624199247.8	693039787.5	516550931.8	1048757565	624626936.5	1720115809	1269465159	911660867	990254455.7	1094146799	567862184	1	1	1.926782289	0.284832646	0.00670734	2.173449678
Q56R17	Importin subunit alpha OS=Rattus norvegicus OX=10116 GN=Kpna4 PE=1 SV=1	7	3	18	1	1	521	57.9	4.94	36.61	3	0	376406.5079	410475.8984	229219.8328	339445.2138	660584.2183	199402.0865	833679.1706	651213.1208	750252.4301	530437.9031	302111.7404	1199148.087	711140.4088	369255.6263	1	1	1.925875621	0.284628236	0.035497249	1.449805303
B0BMS8	Myl9 protein OS=Rattus norvegicus OX=10116 GN=Myl9 PE=1 SV=1	62	8	182	3	1	172	19.8	4.92	498.37	8	0	2832885.341	2934053.891	1946820.293	3287788.707	4918627.849	3801306.205	8540697.818	1466607.693	7277185.381	10158731.46	5376795.282	5066165.897	6314363.922	3286913.714	1	1	1.921061662	0.283541305	0.043715322	1.359366318
E9PT66	Splicing factor 3b, subunit 3 OS=Rattus norvegicus OX=10116 GN=Sf3b3 PE=1 SV=2	7	7	31	7	1	1217	135.5	5.26	66.22	7	0	16757346.67	8171513.824	10633026.49	9961331.657	11645215	7950173.334	18823307.02	8436626.867	31945337.78	33342415.43	15088366.65	17354496.75	20831758.42	10853101.16	1	1	1.91942912	0.283172079	0.039711489	1.401083829
A0A0G2K8C7	Myotubularin-related protein 3 OS=Rattus norvegicus OX=10116 GN=Mtmr3 PE=1 SV=1	1	1	3	1	1	1207	135	5.91	2.06	1	0	NA	95047.25781	87888.99444	105547.8251	129318.8388	50336.53445	NA	NA	224940.8686	184279.5077	NA	129626.4866	179615.6209	93627.89011	0.5	0.833333333	1.918398682	0.282938867	0.017579077	1.755003932
M0R757	Elongation factor 1-alpha OS=Rattus norvegicus OX=10116 GN=LOC100360413 PE=3 SV=1	41	15	572	7	1	462	50.1	9.01	1577.64	15	8	626163152.3	478781068.7	422826731.8	539470430.5	425307206.2	393461779.3	682734227.8	1191847824	1137065115	727213771.5	737304048.2	1056842448	922167905.8	481001728.1	1	1	1.917182105	0.282663367	0.001390559	2.85681058
P84100	60S ribosomal protein L19 OS=Rattus norvegicus OX=10116 GN=Rpl19 PE=1 SV=1	18	5	132	5	1	196	23.5	11.47	396.98	5	0	119895574.3	61520795.56	84372076.24	64282324.6	83510451.71	81531084.1	155256857.3	261512146	131253932.6	26937163.54	206127621.1	167014800.2	158017086.8	82518717.75	1	1	1.914924166	0.28215158	0.046579585	1.331804385
B0BNH8	LOC685157 protein OS=Rattus norvegicus OX=10116 GN=LOC685157 PE=2 SV=1	5	1	1	1	1	222	25.1	8	1.66	1	0	899044.7581	NA	NA	NA	NA	824401.8442	NA	NA	1525964.409	1772536.487	NA	NA	1649250.448	861723.3012	0.333333333	0.333333333	1.913897936	0.281918774	0.025725377	1.589638252
G3V6Q2	RCG48721, isoform CRA_b OS=Rattus norvegicus OX=10116 GN=Trhde PE=4 SV=1	1	1	1	1	1	1066	121.9	7.3	0	1	0	91415.47557	94496.41406	98631.72894	62688.91478	125902.1631	77326.58606	NA	NA	NA	NA	157638.4932	193268.6004	175453.5468	91743.54709	0.333333333	1	1.912434742	0.281586625	0.003480484	2.458360358
Q6IMX7	Hsp70-binding protein 1 OS=Rattus norvegicus OX=10116 GN=Hspbp1 PE=1 SV=1	13	3	10	3	1	357	39.2	5.29	16.69	3	0	400699.675	341266.1875	272684.8231	NA	183089.8427	321663.0088	558815.3971	NA	721482.2713	263226.0735	727681.355	628806.2066	580002.2607	303880.7074	0.833333333	0.833333333	1.908651147	0.280726558	0.017587361	1.754799322
D3ZFL3	Mitogen-activated protein kinase kinase kinase 6 OS=Rattus norvegicus OX=10116 GN=Map3k6 PE=4 SV=1	2	2	3	2	1	1292	143.1	6.6	6.97	2	0	222804.721	165765.5313	NA	159456.5267	337571.2164	135192.2549	254436.6736	NA	425911.0038	NA	366997.4855	510592.2608	389484.3559	204158.0501	0.666666667	0.833333333	1.907758993	0.280523509	0.021202846	1.673605841
Q5XIR9	Ubiquitin-associated domain-containing protein 1 OS=Rattus norvegicus OX=10116 GN=Ubac1 PE=1 SV=1	3	1	2	1	1	409	45.5	4.94	4.93	1	0	122696.7709	240521.3125	99353.5782	78769.83784	201090.4463	NA	244972.7329	198583.2516	461466.72	NA	233409.3485	275418.6857	282770.1477	148486.3891	0.833333333	0.833333333	1.904350624	0.279746913	0.042538051	1.371222412
A0A0G2K227	Transporter OS=Rattus norvegicus OX=10116 GN=Slc6a6 PE=1 SV=1	3	1	17	1	1	631	71	6.7	41.47	1	0	842272.6875	939547.6563	1007779.151	362050.314	2130219.684	1448158.662	NA	NA	1569608.669	2062773.949	2873935.928	2036599.942	2135729.622	1121671.359	0.666666667	1	1.904060048	0.279680641	0.027016907	1.568364372
Q08013	Translocon-associated protein subunit gamma OS=Rattus norvegicus OX=10116 GN=Ssr3 PE=1 SV=2	10	2	38	2	1	185	21.1	9.61	117.01	2	0	6435742.701	7771769.625	7346124.176	7156467.024	11770903.23	7886249.809	5981552.155	26690677.16	9845439.33	12294622.1	20524747.27	16713752.24	15341798.38	8061209.427	1	1	1.903163355	0.279476067	0.044800484	1.348717294
D3ZMI7	Hypothetical protein LOC691141 OS=Rattus norvegicus OX=10116 GN=LOC691141 PE=4 SV=1	5	1	1	1	1	236	25.4	5.02	2.58	1	0	519006.7812	535998	456142.1408	310669.8779	307769.7792	534582.3562	NA	NA	749190.9556	924560.6117	895824.195	808767.8368	844585.8998	444028.1559	0.666666667	1	1.902099875	0.279233317	0.000238601	3.62232774
D3ZI42	Leucine-rich repeat and sterile alpha motif-containing 1 OS=Rattus norvegicus OX=10116 GN=Lrsam1 PE=1 SV=3	2	1	2	1	1	728	84	6.3	5.2	1	0	121788.161	114428.375	NA	NA	131994.5284	NA	NA	NA	289770.1155	253979.3591	135671.1341	252432.5201	232963.2822	122737.0215	0.666666667	0.5	1.898068565	0.278311897	0.039825066	1.399843496
A0A0G2K1C0	Actin-related protein 3 OS=Rattus norvegicus OX=10116 GN=Actr3 PE=1 SV=1	53	19	368	19	1	419	47.6	6.18	963.2	19	0	88121903.14	81256220.87	68998869.69	69099154.47	72501476.24	82693758.7	127933842.4	105375289.5	176651169	143907346.3	161936898.3	162165612.9	146328359.7	77111897.19	1	1	1.897610681	0.278207116	0.000103347	3.985702126
A0A0G2JZB8	Neuronal membrane glycoprotein M6-b OS=Rattus norvegicus OX=10116 GN=Gpm6b PE=4 SV=1	4	1	16	1	1	291	31.5	5.95	43.78	1	0	1094849.816	1621765	905616.0356	927399.3331	1875348.458	752587.8123	1209454.792	NA	2608787.644	2037887.961	3274210.594	2206074.079	2267283.014	1196261.076	0.833333333	1	1.895307855	0.277679763	0.017152201	1.765680143
Q641X8	Eukaryotic translation initiation factor 3 subunit E OS=Rattus norvegicus OX=10116 GN=Eif3e PE=2 SV=1	32	14	122	14	1	445	52.2	6.04	251.22	14	0	45830959.29	16317323.3	24691655.05	19196852.84	20716042.48	15718990.75	41229752.12	35303669.49	70863414.22	26986828.71	40076989.11	55366860.11	44971252.29	23745303.95	1	1	1.89390089	0.277357248	0.022799997	1.64206521
O35828	Coronin-7 OS=Rattus norvegicus OX=10116 GN=Coro7 PE=1 SV=2	13	9	60	9	1	922	100.7	5.9	138.86	9	0	3511945.93	4234626.648	3714775.984	4169912.036	4793647.541	4318587.122	11287519.35	3015621.497	8499381.017	8349685.727	6970373.89	8673170.575	7799292.009	4123915.877	1	1	1.891234507	0.276745383	0.008702212	2.060370341
Q641Y8	ATP-dependent RNA helicase DDX1 OS=Rattus norvegicus OX=10116 GN=Ddx1 PE=1 SV=1	29	18	160	18	1	740	82.4	7.23	374.61	18	0	42801253.34	17387120.05	20224143.82	19053859.74	23965592.87	9443762.632	42429430.79	50263044.42	47149589.97	20703662.66	41426755.69	49043864.05	41836057.93	22145955.41	1	1	1.889106031	0.276256335	0.011626356	1.934556383
A0A0G2KB56	Glutamine fructose-6-phosphate transaminase 1, isoform CRA_a OS=Rattus norvegicus OX=10116 GN=Gfpt1 PE=1 SV=1	36	18	93	15	1	699	78.9	7.02	240.08	18	3	16320626.62	15766919.2	18359151.37	17510941.48	17342991.21	15370852.99	24691806.37	24912329.65	42621066.28	21203558.26	29021603.85	47716813.61	31694529.67	16778580.48	1	1	1.888987552	0.276229096	0.007371053	2.132470466
D4AA13	Dmx-like 1 OS=Rattus norvegicus OX=10116 GN=Dmxl1 PE=1 SV=1	2	5	15	5	1	3017	336.8	6.44	33.24	5	0	2006884.737	1774370.156	1877448.408	1238553.735	1349451.002	1131633.491	1871620.031	NA	2707142.155	4976406.125	2685074.341	2511157.127	2950279.956	1563056.922	0.833333333	1	1.887506408	0.275888435	0.022659691	1.644746017
P85515	Alpha-centractin OS=Rattus norvegicus OX=10116 GN=Actr1a PE=1 SV=1	41	11	152	6	1	376	42.6	6.64	365.2	11	5	24745108.43	24744412.8	22319187.78	16888123.58	27181230.28	20089410.86	58584110.64	12017897.28	66156516.13	32593430.81	35160399.55	51806553.59	42719818	22661245.62	1	1	1.885148712	0.275345616	0.035842164	1.445605777
Q5XI86	Peptidyl-tRNA hydrolase 2 OS=Rattus norvegicus OX=10116 GN=Ptrh2 PE=1 SV=1	28	3	41	3	1	181	19.5	7.42	109.98	3	0	1743350.161	1416276.391	899991.4486	987718.7268	2200829.795	895041.5083	2022009.732	2223117.028	2622624.993	737970.3592	3656734.776	4070557.845	2555502.455	1357201.339	1	1	1.882920671	0.274832023	0.04953896	1.305053115
B5DF86	Conserved oligomeric Golgi complex subunit 8 OS=Rattus norvegicus OX=10116 GN=Cog8 PE=1 SV=1	5	2	2	2	1	634	70.7	5.01	2.42	2	0	122141.4344	170028.0156	147524.076	150989.1332	266997.1195	137243.8361	324199.7332	212768.1531	387697.7756	228146.1	292773.1026	423811.426	311566.0484	165820.6025	1	1	1.878934486	0.273911638	0.004845169	2.31469107
D4AAI2	Histocompatibility (Minor) HA-1 (Predicted), isoform CRA_b OS=Rattus norvegicus OX=10116 GN=Arhgap45 PE=1 SV=1	10	7	25	7	1	1116	123	6.13	84.45	7	0	2160495.301	3328884.125	1598697.559	1376146.836	3339121.608	2511842.553	4655464.422	1241851.176	5635412.609	5459416.577	5785672.793	4117189.923	4482501.25	2385864.664	1	1	1.878774315	0.273874614	0.022487258	1.648063497
P84092	AP-2 complex subunit mu OS=Rattus norvegicus OX=10116 GN=Ap2m1 PE=1 SV=1	37	14	188	14	1	435	49.6	9.54	468.29	14	0	52724834.4	44409302.77	33753778.04	29937506.09	35925076.06	37394193.74	69576708.22	60637308.18	109442360.8	23084216.7	70853712.38	105508940.9	73183874.53	39024115.19	1	1	1.875350003	0.273082333	0.02887759	1.539439054
P21588	5'-nucleotidase OS=Rattus norvegicus OX=10116 GN=Nt5e PE=1 SV=1	23	10	55	10	1	576	63.9	6.98	127.84	10	0	7365733.527	9362683.961	8282973.692	6124494.318	10188771.49	8914821.467	6565658.632	13991894.91	22067488.56	17864371.01	20746649.1	12936645.15	15695451.23	8373246.41	1	1	1.874476214	0.272879934	0.012703773	1.896067275
A0A0G2JZZ3	Cap-binding complex-dependent translation initiation factor OS=Rattus norvegicus OX=10116 GN=Ctif PE=1 SV=1	6	2	7	2	1	598	67.3	6.61	21.36	2	0	335195.851	201572.875	NA	293158.2267	300096.0315	178513.4114	594404.2505	421548.0726	435064.9625	374828.5945	456821.653	654193.4287	489476.827	261707.2791	1	0.833333333	1.870321791	0.271916334	0.002963914	2.528134402
G4XKZ2	Ubiquitin specific peptidase 9 Y-linked OS=Rattus norvegicus OX=10116 GN=Usp9y PE=2 SV=2	4	11	36	1	1	2552	291.7	6.02	81.38	11	0	1735311.899	2097173.25	1550227.724	2016030.089	3201459.282	1606812.944	3880817.881	5238908.51	4252729.982	2536370.484	3590901.277	3292389.013	3798686.191	2034502.532	1	1	1.867132693	0.271175183	0.002831727	2.547948618
Q0ZFS6	Interferon-related developmental regulator 2 OS=Rattus norvegicus OX=10116 GN=Ifrd2 PE=2 SV=1	2	1	1	1	1	441	47.8	6.68	1.83	1	0	187562.0999	122125.0391	140374.4512	104597.4023	130984.3754	102788.1235	307901.2669	216546.0534	357437.2539	138345.7669	241414.6224	207705.9765	244891.8233	131405.2486	1	1	1.863638066	0.270361573	0.00774208	2.111142345
Q5PQL7	Integral membrane protein 2C OS=Rattus norvegicus OX=10116 GN=Itm2c PE=1 SV=1	8	1	7	1	1	269	30.5	8.59	16.06	1	0	132788.4076	163823.75	243212.337	199078.1812	247598.9422	176688.4545	NA	NA	223703.148	265821.818	462409.3814	491792.5955	360931.7357	193865.0121	0.666666667	1	1.861768309	0.269925633	0.0211948	1.673770677
D3ZN38	Similar to StAR-related protein 1-4E (Predicted), isoform CRA_a OS=Rattus norvegicus OX=10116 GN=Stard5 PE=1 SV=1	4	1	2	1	1	213	23.9	6.52	1.74	1	0	71406.35345	165441.4844	89769.37779	147247.9129	NA	94661.38167	NA	213189.3528	NA	209944.6546	NA	NA	211567.0037	113705.302	0.333333333	0.833333333	1.860660848	0.269667219	0.023046983	1.637385919
P62193	26S proteasome regulatory subunit 4 OS=Rattus norvegicus OX=10116 GN=Psmc1 PE=1 SV=1	34	12	109	11	1	440	49.2	6.21	260.26	12	0	13347539.61	15934483.44	13831006.45	13863523.6	18182921.09	13525552.78	23426602.72	47191065.99	33149389.32	14976209.86	21756649.96	24373473.15	27478898.5	14780837.83	1	1	1.859089371	0.269300268	0.021584109	1.665865874
Q6P686	Osteoclast-stimulating factor 1 OS=Rattus norvegicus OX=10116 GN=Ostf1 PE=1 SV=1	53	8	63	8	1	214	23.7	5.68	145.3	8	0	25987699.13	30165772.52	23856134.9	26691126.73	26271533.82	45450041.7	61547047.28	24787822.94	49744942.74	103720894.4	47512117.98	44339495.83	55275386.86	29737051.47	1	1	1.858805232	0.269233886	0.047664165	1.321808011
A0A0G2K735	Ubiquitin-like modifier-activating enzyme 7 OS=Rattus norvegicus OX=10116 GN=Uba7 PE=1 SV=1	2	1	2	1	1	989	109.8	5.69	4.49	1	0	300223.3332	363006.2813	290713.9357	258539.6337	541881.8117	325812.8015	652856.6348	424167.8708	854921.7109	NA	NA	NA	643982.0721	346696.2995	0.5	1	1.857481816	0.268924571	0.022225865	1.653141328
F1M0R1	Ring finger protein 213 OS=Rattus norvegicus OX=10116 GN=Rnf213 PE=1 SV=3	4	16	65	16	1	5136	583	6.89	142.31	16	0	6300635.673	1789918.398	4591310.716	2445778.992	4720671.423	2499076.625	4492304.02	5948624.797	5269275.405	4454397.988	9957099.484	11349302.89	6911834.096	3724565.304	1	1	1.855742491	0.268517712	0.047483114	1.323460807
Q5D059	Heterogeneous nuclear ribonucleoprotein K OS=Rattus norvegicus OX=10116 GN=Hnrnpk PE=1 SV=1	37	14	186	14	1	464	51	5.33	451.8	14	0	71874162.3	61885802	42797240.26	52844895.08	48103271.32	61797393.86	128996679.2	154098101.9	106360919.8	81788765.25	94815173.5	62766321.9	104804326.9	56550460.8	1	1	1.853288646	0.267943065	0.006569874	2.182442959
D4A4K4	Vacuolar protein sorting 13 homolog C OS=Rattus norvegicus OX=10116 GN=Vps13c PE=1 SV=2	14	35	162	35	1	3739	418.4	6.84	409.39	35	0	19053058.2	18528135.08	14830591.39	14684552.6	32439166.95	12657286.42	38749281.23	23489973.2	44562249.51	35540758.46	37000498.73	28228479.98	34595206.85	18698798.44	1	1	1.850129941	0.267202231	0.003883699	2.410754437
Q56R18	Importin subunit alpha OS=Rattus norvegicus OX=10116 GN=Kpna3 PE=1 SV=1	17	6	35	4	1	521	57.7	4.94	80.14	6	2	2502290.536	2563374.344	1946720.421	2208931.327	3981063.496	1874874.471	5155173.553	3050751.586	4032813.164	5941585.527	5070508.855	4592190.613	4640503.883	2512875.766	1	1	1.846690531	0.266394122	0.002093545	2.6791177
Q3MIE5	Dock2 protein OS=Rattus norvegicus OX=10116 GN=Dock2 PE=2 SV=1	15	11	33	10	1	859	99	8.25	67.68	11	0	4775761.618	4227795	3104926.823	4850034.161	4590141.109	4390497.809	5866065.505	2018809.734	12000895.06	6829681.827	12061511.21	9076967.163	7975655.082	4323192.753	1	1	1.844852991	0.265961765	0.046271174	1.334689481
Q63691	Monocyte differentiation antigen CD14 OS=Rattus norvegicus OX=10116 GN=Cd14 PE=2 SV=2	29	8	94	8	1	372	40	5.52	205.78	8	0	9069476.389	10366337.1	8586991.791	4872507.335	10815365.22	8217782.831	11392786.29	6187860.165	21455644.03	22493126.5	19173055	15068851.17	15961887.19	8654743.445	1	1	1.844293513	0.265830039	0.022998688	1.638296938
P02680	Fibrinogen gamma chain OS=Rattus norvegicus OX=10116 GN=Fgg PE=1 SV=3	59	23	623	23	1	445	50.6	5.96	1688.66	23	0	214005227.8	194461036.5	162907792.7	208648304.9	164519140.5	384462478.9	391612859.7	279965633.6	346286854.1	669385381.1	446971723.6	315116393.5	408223140.9	221500663.6	1	1	1.842988343	0.265522588	0.018697888	1.728207446
Q4FZT9	26S proteasome non-ATPase regulatory subunit 2 OS=Rattus norvegicus OX=10116 GN=Psmd2 PE=1 SV=1	33	24	203	24	1	908	100.1	5.2	480.33	24	0	25160558.72	33137368.64	38080361.64	28649153.18	56473346.44	37763159.43	67508499.37	81398013.55	99730778.81	49409510.24	51457801.93	54336245.97	67306808.31	36543991.34	1	1	1.841802328	0.265243018	0.007903977	2.102154332
B2RZC6	Ilf2 protein OS=Rattus norvegicus OX=10116 GN=Ilf2 PE=1 SV=1	16	4	17	4	1	390	43	5.26	40.58	4	0	2537661.975	1174236.828	595203.7704	1138054.211	1785975.868	1126368.508	1912465.473	1785297.985	3154373.127	3623460.347	3055565.983	1804246.347	2555901.544	1392916.86	1	1	1.834927566	0.263618925	0.022681067	1.644336519
D3ZEY4	Diacylglycerol kinase OS=Rattus norvegicus OX=10116 GN=Dgkq PE=1 SV=1	1	1	3	1	1	937	102.5	7.3	6.13	1	0	120231.5123	133058.5469	77654.19798	116528.2678	155613.1356	68980.66216	192015.1583	144017.7823	263696.8587	75406.29206	260379.8464	296675.7908	205365.2881	112011.0538	1	1	1.833437693	0.263266156	0.030214214	1.519788699
D3Z9E5	Solute carrier family 5 member 8 OS=Rattus norvegicus OX=10116 GN=Slc5a8 PE=3 SV=1	2	1	2	1	1	611	66.4	7.64	5.42	1	0	200883.5397	517021.3438	NA	135190.9158	415614.2368	302090.3027	521744.713	NA	720777.2103	NA	502151.7645	553312.6941	574496.5955	314160.0678	0.666666667	0.833333333	1.828674788	0.262136477	0.023349367	1.631724889
O35824	DnaJ homolog subfamily A member 2 OS=Rattus norvegicus OX=10116 GN=Dnaja2 PE=1 SV=1	19	7	49	6	1	412	45.7	6.48	108.19	7	1	13849256.1	13784983.03	19860841.83	14600671.28	19131336	13083441.07	32914214.66	43183027.67	29295592.33	14340310.29	26337620.2	26173111.03	28707312.7	15718421.55	1	1	1.826348314	0.261583608	0.009284231	2.032254062
F1M6V0	Neurobeachin-like 1 OS=Rattus norvegicus OX=10116 GN=Nbeal1 PE=1 SV=3	7	14	43	14	1	2690	306.4	6.42	105.86	14	0	6385498.685	2886889.035	6241820.31	5073091.575	6265182.351	2551998.325	10984580.22	1798801.04	7999589.468	11898117.42	9093058.429	11913609.9	8947959.414	4900746.714	1	1	1.825835926	0.261461748	0.040789703	1.389449457
P24090	Alpha-2-HS-glycoprotein OS=Rattus norvegicus OX=10116 GN=Ahsg PE=1 SV=2	38	11	306	11	1	352	38	6.51	1011.97	11	0	106814123.5	110618847.9	102235520.4	150462525.8	111822930.3	126012027.8	247642377.3	95271098.6	202334677	340390750.5	207006507.8	198758807.6	215234036.4	117994329.3	1	1	1.824104919	0.261049814	0.015215705	1.81770792
F1LNL3	ATP-binding cassette subfamily A member 1 OS=Rattus norvegicus OX=10116 GN=Abca1 PE=1 SV=3	4	7	16	7	1	2261	253.8	6.7	36.8	7	0	1532637.863	2276131.953	1638010.185	1198283	1056484.087	1320193.553	1902712.601	1357816.329	4607784.61	3371733.734	3330244.22	1879326.287	2741602.963	1503623.44	1	1	1.823330822	0.260865473	0.042659573	1.369983496
D4A563	Pseudopodium-enriched atypical kinase 1 OS=Rattus norvegicus OX=10116 GN=Peak1 PE=1 SV=1	2	2	9	2	1	1733	191	6.96	23.38	2	0	280139.2132	199151.0625	467617.9555	191811.015	NA	196780.6619	NA	NA	380437.2405	379103.9425	515900.0943	669305.717	486186.7486	267099.9816	0.666666667	0.833333333	1.820242538	0.260129259	0.036779769	1.434391003
D3ZD83	Major facilitator superfamily domain-containing 10 OS=Rattus norvegicus OX=10116 GN=Mfsd10 PE=1 SV=1	3	1	5	1	1	456	49.4	9.91	10.29	1	0	229570.2402	434374.3125	258357.106	NA	444964.782	260943.3096	NA	NA	475769.3669	718642.8291	674299.4761	500650.7	592340.593	325641.9501	0.666666667	0.833333333	1.818993508	0.259831149	0.009566129	2.019263767
P63036	DnaJ homolog subfamily A member 1 OS=Rattus norvegicus OX=10116 GN=Dnaja1 PE=1 SV=1	21	7	69	7	1	397	44.8	7.08	172.46	7	0	12619537.45	9329893.781	13869429.05	17049078.73	14990325.87	9005334.989	21382614.89	42315162.29	21803296.65	13463438.49	16619746.24	24156011.24	23290044.97	12810599.98	1	1	1.818029211	0.259600857	0.0357331	1.446929305
Q5PPJ6	Leucyl-tRNA synthetase OS=Rattus norvegicus OX=10116 GN=Lars PE=1 SV=1	20	19	103	19	1	1178	134.2	7.28	243.39	19	0	16922164.43	19440112.56	16931404.33	16644705.96	21065751.76	18887233.74	44129505.46	28429548.48	48038500.35	21581869.35	29905844.24	27699080.87	33297391.46	18315228.8	1	1	1.81801668	0.259597863	0.005865082	2.231725912
Q6P6U2	26S proteasome regulatory subunit 6A OS=Rattus norvegicus OX=10116 GN=Psmc3 PE=1 SV=1	39	14	129	14	1	442	49.5	5.19	293.17	14	0	10251404.22	13839832.4	12675375.13	10901090.18	19785497.92	12604206.65	23713041.03	26516173.73	31649347.91	19596559.12	21440015.47	22547699.76	24243806.17	13342901.08	1	1	1.816981631	0.259350537	0.000660746	3.179965457
Q6AYU2	Pcbp2 protein OS=Rattus norvegicus OX=10116 GN=Pcbp2 PE=2 SV=1	29	8	97	7	1	362	38.2	6.79	212.8	8	1	21912366.37	21096771.88	22329208.47	26080100.83	20722697.79	25625817.52	44285972.8	38899396.71	49812608.18	32093378.54	49459114.85	35346190.48	41649443.59	22961160.48	1	1	1.813908475	0.25861537	0.000149097	3.826531095
A0A0G2K2P6	HBS1-like protein OS=Rattus norvegicus OX=10116 GN=Hbs1l PE=1 SV=1	8	4	9	4	1	679	74.8	6.6	20.48	4	0	1305054.773	973784.2188	1151533.604	1134291.891	668788.6382	186213.2912	1840613.357	1409092.426	2021676.121	977322.3211	NA	1927761.067	1635293.058	903277.736	0.833333333	1	1.810398943	0.257774287	0.018880272	1.723991753
F1LSM0	Ubiquitin-specific peptidase 24 OS=Rattus norvegicus OX=10116 GN=Usp24 PE=1 SV=2	9	18	58	18	1	2617	293.8	6.14	111.07	18	0	5247538.763	3378370.539	4221147.837	3207519.688	3712363.827	3680122.761	5652644.419	4699547.305	9906031.945	6625915.755	6219583.802	9312294.138	7069336.227	3907843.903	1	1	1.809011927	0.25744143	0.005655256	2.247547731
G3V8L1	PYD and CARD domain-containing OS=Rattus norvegicus OX=10116 GN=Pycard PE=1 SV=1	22	3	8	3	1	193	21.7	5.27	16.76	3	0	406979.3578	339950.1563	698688.9689	719617.258	461487.1688	614257.0872	926106.0085	339650.3213	1283484.873	614312.7119	1407572.374	1291478.725	977100.8355	540163.3328	1	1	1.808898857	0.257414284	0.041293441	1.384118926
B5DES1	RCG33340 OS=Rattus norvegicus OX=10116 GN=Rpl23a PE=2 SV=1	42	8	158	8	1	156	17.7	10.45	384.97	8	0	125541940.2	70947647	34540634.84	71038140.6	67745491.16	84304286.63	116939378.1	206133564.1	110041815.4	61458018.24	164168457.3	162126717.6	136811325.1	75686356.74	1	1	1.807608808	0.257104449	0.02925561	1.533790842
Q66H80	Coatomer subunit delta OS=Rattus norvegicus OX=10116 GN=Arcn1 PE=2 SV=1	42	21	243	21	1	511	57.2	6.21	583.85	21	0	64591960.59	26097029.4	70051599.26	59029329.6	57823768.5	25723653.13	86955446.53	60868413.67	91842927.7	54875157.78	129375382	123519148.4	91239412.68	50552890.08	1	1	1.804830793	0.256436492	0.021290206	1.671820136
Q920H8	Hephaestin OS=Rattus norvegicus OX=10116 GN=Heph PE=1 SV=1	6	5	28	5	1	1157	129.5	6.15	63.63	5	0	2006458.38	2092195.922	1506546.611	1333837.997	2030276.62	1886333.318	4257863.29	NA	3700168.798	1834064.676	2899675.52	3611706.172	3260695.691	1809274.808	0.833333333	1	1.802211404	0.255805733	0.005659101	2.247252555
P62198	26S proteasome regulatory subunit 8 OS=Rattus norvegicus OX=10116 GN=Psmc5 PE=1 SV=1	51	18	113	17	1	406	45.6	7.55	277.38	18	1	22126673.4	27389497.34	25315142.19	22482870.94	33315280.89	24849114.72	40488999.55	79289138.75	57833987.69	28722458.15	33785606.8	40060323.79	46696752.46	25913096.58	1	1	1.802052191	0.255767365	0.024249884	1.615290335
I6L9G6	RCG31562, isoform CRA_c OS=Rattus norvegicus OX=10116 GN=Tardbp PE=1 SV=1	27	7	45	7	1	285	32.1	6.99	106.5	7	0	5237916.987	6482630.594	3135753.984	2362302.811	8335965.488	6145064.408	8343998.677	13133681.52	13013859.29	7632157.075	8030028.542	6923932.646	9512942.958	5283272.379	1	1	1.8005778	0.255411891	0.015834035	1.800408399
D3ZE72	Methionine aminopeptidase OS=Rattus norvegicus OX=10116 GN=Metap1 PE=1 SV=1	19	5	16	5	1	386	43.2	7.17	36.58	5	0	3585025.024	2517739.859	452561.3733	1577919.449	2517199.447	702872.2689	2842816.181	4214468.453	4493203.105	3899410.136	1456624.353	3524354.702	3405146.155	1892219.57	1	1	1.799551283	0.255164228	0.047364339	1.324548519
D4AEP0	Adenylosuccinate synthetase isozyme 2 OS=Rattus norvegicus OX=10116 GN=Adss PE=1 SV=1	13	4	28	4	1	456	50.1	6.38	61.63	4	0	1285292.613	1686718.359	1390074.379	1511793.554	2274516.531	1789135.236	2993344.037	1799185.933	3509341.909	2515625.759	3623091.517	3397849.665	2973073.137	1656255.112	1	1	1.795057486	0.254078361	0.002176052	2.662330731
D3ZCS3	Poly(rC)-binding protein 4 OS=Rattus norvegicus OX=10116 GN=Pcbp4 PE=4 SV=1	5	2	19	1	1	403	41.4	8.16	20.9	2	0	5566510.341	4906589	4843834.924	3941601.777	3744747.946	3966939.097	9733443.813	9679581.897	9930543.228	6659711.571	6150845.239	6172873.558	8054499.885	4495037.181	1	1	1.791865019	0.253305291	0.001592363	2.797957922
G3V7W8	Similar to RIKEN cDNA D230025D16Rik OS=Rattus norvegicus OX=10116 GN=RGD621098 PE=1 SV=1	2	1	2	1	1	422	47.4	7.91	3.96	1	0	388712.8045	330570.7188	537837.4037	223896.1523	345087.715	559883.7519	409085.1478	375086.563	789410.4911	773352.1981	997355.441	927147.2118	711906.1755	397664.7577	1	1	1.790216914	0.252905656	0.024891727	1.603944971
Q6AYB5	Signal recognition particle 54 kDa protein OS=Rattus norvegicus OX=10116 GN=Srp54 PE=2 SV=1	28	12	49	12	1	504	55.7	8.75	113.91	12	0	15307174.45	11206114.38	11786390.59	12644686.01	17614019.49	10278737.14	16958431.05	23472079.33	20125114.92	39220037.15	23866437.15	17364344.32	23501073.99	13139520.34	1	1	1.788579292	0.252508198	0.015305532	1.81515157
P19945	60S acidic ribosomal protein P0 OS=Rattus norvegicus OX=10116 GN=Rplp0 PE=1 SV=2	45	10	278	10	1	317	34.2	6.25	834.89	10	0	199252763.3	99350383.58	143659956.1	105495190.7	139314498.9	113316015.9	239644661.1	322737919.2	212083888.4	113331980.9	227841592.9	313464560.9	238184100.6	133398134.7	1	1	1.785512976	0.251763011	0.01279983	1.892795798
A0A0G2K428	Dynactin subunit 1 OS=Rattus norvegicus OX=10116 GN=Dctn1 PE=1 SV=1	35	35	325	35	1	1263	139.8	5.69	839.8	35	0	52776295.18	50176289.29	57253656.12	56407469.05	62652350.31	45131421.65	133128415.1	28834170.52	133419405.9	88623545.98	79510177.26	115572935	96514774.95	54066246.93	1	1	1.78512067	0.251667579	0.027887126	1.554596241
A0A0G2QC02	Ski2-like RNA helicase OS=Rattus norvegicus OX=10116 GN=Skiv2l PE=1 SV=1	16	12	45	12	1	1244	137.2	6.38	110.02	12	0	7340209.542	2925971.895	2129272.93	3301676.198	2936372.904	2669393.999	6607215.736	5190947.871	8583168.079	4098148.222	6737490.786	6736496.106	6325577.8	3550482.911	1	1	1.781610546	0.250812775	0.019228285	1.716059449
M0R9X8	Cytoplasmic dynein 1 heavy chain 1 OS=Rattus norvegicus OX=10116 GN=Dync1h1 PE=1 SV=2	39	157	2010	157	1	4644	531.7	6.42	4669.05	157	0	342146820	358923393.9	375008173.8	394634788.3	375756923.3	317417933.4	667082478.7	197908398.1	821829290.9	647630802	755231760.6	763226105.1	642151472.6	360648005.5	1	1	1.780549075	0.250553948	0.01300759	1.885803161
D3ZRN5	TROVE domain family, member 2 OS=Rattus norvegicus OX=10116 GN=Trove2 PE=1 SV=1	4	2	11	2	1	538	60	8.06	19.09	2	0	559052.5696	582062.4688	522643.8273	637204.3244	816898.2709	612399.0041	1319522.116	521532.5986	1406736.898	839570.0013	1504479.91	1042913.896	1105792.57	621710.0775	1	1	1.778630603	0.25008576	0.012651293	1.897865086
O08629	Transcription intermediary factor 1-beta OS=Rattus norvegicus OX=10116 GN=Trim28 PE=1 SV=2	12	7	42	7	1	835	88.9	5.77	101.79	7	0	1899340.406	2641920.555	582973.3843	1536303.637	4662865.743	2144841.929	3218087.796	3174612.732	4217120.233	5245169.41	3059959.81	5006769.745	3986953.288	2244707.609	1	1	1.776157069	0.249481369	0.029678317	1.527560731
B1H264	TBC1 domain family, member 17 OS=Rattus norvegicus OX=10116 GN=Tbc1d17 PE=1 SV=1	1	1	2	1	1	646	72.8	5.22	4.18	1	0	255516.9638	NA	318866.8088	380235.8335	316521.2054	223503.0823	385162.8485	NA	551753.6509	696313.6687	556878.9908	464150.1137	530851.8545	298928.7787	0.833333333	0.833333333	1.775847266	0.249405611	0.004254675	2.371133609
Q5I0L4	Cytosolic Fe-S cluster assembly factor NUBP1 OS=Rattus norvegicus OX=10116 GN=Nubp1 PE=1 SV=1	17	3	7	3	1	320	34	6.07	14.56	3	0	111090.6925	90580.96875	NA	NA	104303.0536	NA	161617.1466	205196.2613	250972.0634	NA	126286.4204	161357.6075	181085.8998	101991.5716	0.833333333	0.5	1.775498671	0.249320352	0.034263217	1.465171863
A0A140TAE0	Major vault protein OS=Rattus norvegicus OX=10116 GN=Mvp PE=1 SV=1	59	40	698	40	1	871	96.8	5.63	1669.43	40	0	140664881.4	146495542.3	169599619.3	238165987.2	197008104.7	130771116.7	350144366.8	47730502.74	346635412.7	329786796.8	352408607	388035490.3	302456862.7	170450875.3	1	1	1.774451802	0.249064207	0.035012351	1.455778726
P06685	Sodium/potassium-transporting ATPase subunit alpha-1 OS=Rattus norvegicus OX=10116 GN=Atp1a1 PE=1 SV=1	40	41	923	28	1	1023	113	5.45	2310.71	41	13	322261510.9	371826849.1	464452286	325497145.5	334545745.6	461122669.4	466067088.7	598232838.6	1024376096	778754497	693627601.7	484032889.7	674181835.3	379951034.4	1	1	1.774391367	0.249049416	0.008282233	2.081852556
B5DEL9	40S ribosomal protein S7 OS=Rattus norvegicus OX=10116 GN=Rps7 PE=2 SV=1	30	6	43	6	1	194	22.1	10.1	97.16	6	0	40168839.88	25318457.63	40226848.41	29970247.63	25909579.01	35230443.4	67689623.52	88987102.82	54654016.57	45202715.92	46357242.88	45987478	58146363.29	32804069.32	1	1	1.772535069	0.248594836	0.007594564	2.119497154
G3V615	Complement factor B OS=Rattus norvegicus OX=10116 GN=Cfb PE=1 SV=1	29	19	260	19	1	763	85.3	6.96	597.15	19	0	100499088.4	58806340.01	36673130.79	48746293.98	59988035.23	62889856.19	74769993.54	40554661.91	100247950.5	163600997.5	137721142.4	134664200.2	108593157.7	61267124.09	1	1	1.772453976	0.248574967	0.04429645	1.353631078
Q7TQ70	Ac1873 OS=Rattus norvegicus OX=10116 GN=Fga PE=1 SV=1	38	28	453	28	1	782	86.6	5.74	1047.57	28	0	182090785.7	169746255.3	166829198.1	226757204.4	131297664.6	346121946.9	498968550.6	196960049.8	348862557.2	497219780.6	343096226.9	279294498	360733610.5	203807175.8	1	1	1.769975022	0.247967138	0.021977127	1.658029082
Q505J8	Phenylalanine--tRNA ligase alpha subunit OS=Rattus norvegicus OX=10116 GN=Farsa PE=1 SV=1	32	12	131	12	1	508	57.7	8.28	295.78	12	0	29935423.58	10747524.57	11296331.72	10657722.03	11034179.65	10624725.57	33722368.19	21446730.84	30597210.64	14010727.49	16573255.81	32786371.81	24856110.8	14049317.86	1	1	1.769204103	0.247777938	0.045984007	1.337393187
P14270	cAMP-specific 3',5'-cyclic phosphodiesterase 4D OS=Rattus norvegicus OX=10116 GN=Pde4d PE=1 SV=4	2	1	1	1	1	803	90.5	5.62	2.6	1	0	122547.5202	338577.4063	202285.14	139481.603	183742.6498	205369.1701	480030.4407	323367.1084	366565.1737	232796.955	NA	NA	350689.9194	198667.2483	0.666666667	1	1.765212548	0.246797006	0.026991169	1.568778306
D3ZD31	Mannose receptor, C type 1 OS=Rattus norvegicus OX=10116 GN=Mrc1 PE=1 SV=3	37	44	587	44	1	1456	164.9	6.86	1335.97	44	0	203902142.6	223019004.4	180128125.3	154799790.9	203619190.6	217169463.8	225468981.2	110517217.3	475431545.4	374998811.3	522657258.2	377168902.1	347707119.3	197106286.3	1	1	1.764059005	0.246513108	0.040486975	1.39268467
A0A0G2JV54	Polypyrimidine tract-binding protein 3 OS=Rattus norvegicus OX=10116 GN=Ptbp3 PE=1 SV=1	21	8	30	7	1	554	59.8	8.94	62.69	8	0	3205475.322	2923003.625	2779001.074	2759675.507	2489872.408	3714111.263	7494056.463	4034270.753	6919428.199	3008164.137	3988939.688	6074307.536	5253194.463	2978523.2	1	1	1.763690967	0.246422491	0.013886433	1.857409297
O08560	Diacylglycerol kinase zeta OS=Rattus norvegicus OX=10116 GN=Dgkz PE=1 SV=1	2	1	1	1	1	929	103.9	8.05	2.16	1	0	179236.1363	219037.4375	229797.0427	79357.11273	204754.5831	162516.7313	364278.3368	NA	206422.3323	351455.7382	NA	340159.1011	315578.8771	179116.5073	0.666666667	1	1.761863727	0.245972314	0.009586812	2.018325789
Q9JMJ4	Pre-mRNA-processing factor 19 OS=Rattus norvegicus OX=10116 GN=Prpf19 PE=1 SV=2	7	3	16	3	1	504	55.2	6.61	32.91	3	0	3487766.206	1867761.625	591576.2828	1342018.21	1421398.218	1253958.222	2394403.553	1361184.143	3573190.798	3640495.081	3626077.576	2954416.82	2924961.329	1660746.461	1	1	1.761232914	0.245816793	0.043644663	1.360068856
Q6MGC4	H2-K region expressed gene 2, rat orthologue OS=Rattus norvegicus OX=10116 GN=Pfdn6 PE=1 SV=1	9	1	5	1	1	127	14.5	8.88	15.66	1	0	784636.8373	1210327.625	665674.5328	679368.8715	1529533.288	696176.425	1858922.825	1087758.824	1232467.002	NA	2358671.796	1623277.9	1632219.669	927619.5966	0.833333333	1	1.759578684	0.245408692	0.024727983	1.606811307
B5DFH7	Tnf receptor-associated factor 2 OS=Rattus norvegicus OX=10116 GN=Traf2 PE=1 SV=1	3	1	6	1	1	497	55.5	6.99	15.14	1	0	138371.8833	NA	272308.5028	407932.6827	196854.5664	145265.653	439666.5345	416582.0177	392687.4903	304614.2016	357699.6522	535169.7569	407736.6089	232146.6576	1	0.833333333	1.756375099	0.244617271	0.013563731	1.867620832
P51583	Multifunctional protein ADE2 OS=Rattus norvegicus OX=10116 GN=Paics PE=1 SV=3	40	14	116	14	1	425	47.1	7.69	295.74	14	0	21025036.91	11038720.73	14293669.24	14837497.36	13916666.42	11608867.12	25851661.65	30154300	32715338.42	21665710.11	18712796.46	23116512.6	25369386.54	14453409.63	1	1	1.755252718	0.244339654	0.001857159	2.731150913
Q8VI02	Serine/threonine-protein phosphatase 4 regulatory subunit 1 OS=Rattus norvegicus OX=10116 GN=Ppp4r1 PE=1 SV=1	3	2	3	2	1	951	105.5	4.79	6.22	2	0	152609.6701	126078.9609	116902.9061	149616.397	110428.4322	104774.6457	198915.6056	173455.8308	301361.4039	NA	215910.2894	222394.0107	222407.4281	126735.1687	0.833333333	1	1.754899058	0.244252141	0.001562787	2.80610021
P47197	RAC-beta serine/threonine-protein kinase OS=Rattus norvegicus OX=10116 GN=Akt2 PE=1 SV=1	9	4	26	2	1	481	55.5	6.37	41.86	4	0	1285369.267	393133.0938	783113.3058	763660.3346	1513049.985	756876.9993	NA	979295.0508	1902147.389	1221424.671	1836343.473	2095912.696	1607024.656	915867.1642	0.833333333	1	1.754648183	0.244190051	0.029425644	1.531274024
A0A0G2K9K2	Transforming, acidic coiled-coil-containing protein 1 OS=Rattus norvegicus OX=10116 GN=Tacc1 PE=1 SV=1	2	1	1	1	1	784	85.6	5.02	2.78	1	0	1090351.516	NA	865916.3807	745360.0048	665019.3402	605642.9882	1180631.451	NA	1319347.049	835423.3783	1356142.418	2276234.713	1393555.802	794458.0459	0.833333333	0.833333333	1.754096153	0.244053396	0.046057137	1.336703062
Q7TSU1	Brefeldin A-inhibited guanine nucleotide-exchange protein 2 OS=Rattus norvegicus OX=10116 GN=Arfgef2 PE=1 SV=1	12	17	78	8	1	1791	201.8	6.51	176.8	17	0	2359745.638	1263614.156	2508739.432	2328066.977	2159851.958	1484879.816	3768850.918	3487487.099	3775559.203	2162654.679	2334358.138	5636412.894	3527553.822	2017482.996	1	1	1.748492467	0.242663766	0.021212788	1.673402248
B2ZDP8	Calcium release-activated calcium modulator 1 OS=Rattus norvegicus OX=10116 GN=ORAI1 PE=2 SV=1	4	1	1	1	1	304	33	7.17	2.39	1	0	405850.516	617553.9375	288477.8587	258055.1195	450610.8482	293314.7625	786406.5179	612415.7563	769643.7955	342209.4078	655432.887	866081.8825	672031.7078	385643.8404	1	1	1.742622693	0.241203365	0.012376185	1.907413207
D3ZC96	Tetratricopeptide repeat protein 39B OS=Rattus norvegicus OX=10116 GN=Ttc39b PE=3 SV=1	4	2	11	2	1	617	70.1	6.83	6.66	2	0	345702.8621	463056.5938	432263.3382	487096.8952	470595.8776	430027.533	338338.2233	726865.127	947334.4697	790335.0087	1006786.804	765022.4223	762447.0091	438123.85	1	1	1.740254517	0.24061277	0.007917657	2.101403316
F1LND1	Component of oligomeric golgi complex 1 OS=Rattus norvegicus OX=10116 GN=Cog1 PE=1 SV=1	5	4	17	4	1	980	108.6	7.3	39.19	4	0	532216.9821	679847.3516	1078917.87	1012887.209	1103725.326	482226.3566	1398810.036	1028668.307	1405062.772	1656452.462	1440825.923	1579148.815	1418161.386	814970.1825	1	1	1.740138984	0.240583937	0.002009427	2.696927767
A0A0G2JXG5	Uncharacterized protein OS=Rattus norvegicus OX=10116 PE=1 SV=1	12	2	5	2	1	165	17.7	6.38	10.85	2	0	1756398.965	513157.9063	2078893.26	1077307.147	732251.2625	1315340.522	2815232.269	2116313.356	3191111.633	1767341.052	1137891.494	1959198.563	2164514.728	1245558.177	1	1	1.737786936	0.239996528	0.039481641	1.403604805
G3V7L6	26S proteasome regulatory subunit 7 OS=Rattus norvegicus OX=10116 GN=Psmc2 PE=1 SV=1	52	20	118	20	1	433	48.6	5.95	299.76	20	0	19820786.36	24464552.05	23745034.03	19816084	32626806.83	24279217.91	36475758.26	58332903.33	51038357.02	33680866.02	33324868.35	38647598.4	41916725.23	24125413.53	1	1	1.737451057	0.23991258	0.003270007	2.485451318
O35303	Dynamin-1-like protein OS=Rattus norvegicus OX=10116 GN=Dnm1l PE=1 SV=1	28	16	64	16	1	755	83.9	7.08	138.81	16	0	3799668.242	4117417.477	7090192.047	7552696.681	4717573.952	4168310.341	9066264.813	7003853.226	13546901.7	8432701.956	8081176.72	8453257.237	9097359.276	5240976.457	1	1	1.735813803	0.239503138	0.0072842	2.137618138
D3ZV15	Cbl proto-oncogene OS=Rattus norvegicus OX=10116 GN=Cbl PE=1 SV=1	7	5	20	5	1	914	100.6	6.7	39.69	5	0	3087702.443	1261169.258	1457401.351	1472650.251	1996312.411	2024525.644	3424443.656	NA	3571514.346	2635674.693	2095297.558	4601111.437	3265608.338	1883293.56	0.833333333	1	1.73398795	0.239046075	0.019980029	1.699403886
D3ZW08	Adenylosuccinate lyase OS=Rattus norvegicus OX=10116 GN=Adsl PE=1 SV=1	8	3	23	3	1	484	54.8	7.11	47.18	3	0	3783565.548	3573236.25	3481618.325	4742563.188	5803499.154	4318035.027	7812106.494	6593462.556	9894781.749	5908771.22	7066046.797	7282883.487	7426342.05	4283752.915	1	1	1.733606535	0.238950535	0.00081865	3.086901734
Q498C9	RCG33491, isoform CRA_b OS=Rattus norvegicus OX=10116 GN=Zfp207 PE=1 SV=1	3	1	7	1	1	464	49.7	9.1	21.86	1	0	1175935.019	607038.125	828929.0516	625622.7437	NA	622211.52	1404422.173	1061021.169	954810.1268	1923277.769	NA	NA	1335882.809	771947.2919	0.666666667	0.833333333	1.730536299	0.238180713	0.042556626	1.371032811
Q6P7P5	Basic leucine zipper and W2 domain-containing protein 1 OS=Rattus norvegicus OX=10116 GN=Bzw1 PE=1 SV=1	13	7	44	7	1	419	48	5.92	87.14	7	0	5866194.853	6692237	5858512.084	3987269.135	3762516.32	3930923.228	5438983.045	11376082.51	9405994.861	5917756.992	9164934.337	10743041.17	8674465.487	5016275.437	1	1	1.729264191	0.237861348	0.009014115	2.045076906
F1M446	Ecm29 proteasome adaptor and scaffold OS=Rattus norvegicus OX=10116 GN=Ecpas PE=1 SV=3	9	13	58	13	1	1839	203.8	7.14	119.26	13	0	2962718.399	3874998.969	3888746.29	3852051.043	5609872.572	3653304.695	5940545.411	6893007.738	9122002.549	4887038.983	7019575.466	7338330.017	6866750.027	3973615.328	1	1	1.728086254	0.237565416	0.001706348	2.767932392
A0A0H2UHC9	Solute carrier family 35 member B1 OS=Rattus norvegicus OX=10116 GN=Slc35b1 PE=4 SV=1	3	1	4	1	1	358	39.5	9.35	5.95	1	0	362026.238	622458.25	446500.8705	335667.3691	675841.9269	492312.7241	509865.0108	635126.3149	703892.7367	1312555.839	1195609.265	711259.4916	844718.1096	489134.5631	1	1	1.726964671	0.237283453	0.034022916	1.468228467
Q498D8	Ring-box 1 OS=Rattus norvegicus OX=10116 GN=Rbx1 PE=1 SV=1	7	1	11	1	1	108	12.3	6.96	26.43	1	0	4847691.579	4295142	5092780.14	4218755.294	5402692.917	5610854.117	5424991.991	11758127.5	10513051.92	3710441.364	8359184.154	10713515.44	8413218.73	4911319.341	1	1	1.713026204	0.233764006	0.025564968	1.592354747
B5DF88	N-acetylglucosamine-1-phosphodiester alpha-N-acetylglucosaminidase OS=Rattus norvegicus OX=10116 GN=Nagpa PE=2 SV=1	6	2	4	2	1	517	55.8	6.16	10.15	2	0	487527.2097	589774.5625	487570.2934	476598.6903	581001.581	521144.3113	1105037.078	609957.763	442351.5272	793012.7927	1186212.216	1245945.915	897086.2154	523936.108	1	1	1.712205365	0.233555854	0.021246783	1.672706818
M0RA83	ATP-binding cassette sub-family A member 5 OS=Rattus norvegicus OX=10116 GN=Abca5 PE=4 SV=2	3	4	7	4	1	1653	186.9	7.09	10.75	4	0	702459.8038	899279.4453	1029259.429	529428.3589	975809.298	634588.677	1328366.602	NA	2326374.434	894013.7674	1295417.502	962361.2564	1361306.712	795137.5019	0.833333333	1	1.712039376	0.233513749	0.048803639	1.311547794
D4ADM8	Ras homolog family member D OS=Rattus norvegicus OX=10116 GN=Rhod PE=1 SV=1	16	2	4	2	1	210	23.7	8.02	9.17	2	0	234160.0797	692226.25	602062.4441	487185.8661	263002.664	707301.2603	405114.7703	783081.2207	656368.297	1195795.001	1178119.537	888717.6779	851199.4174	497656.4274	1	1	1.710415802	0.2331017	0.041474038	1.382223679
P68101	Eukaryotic translation initiation factor 2 subunit 1 OS=Rattus norvegicus OX=10116 GN=Eif2s1 PE=1 SV=2	54	18	155	18	1	315	36.1	5.08	382.8	18	0	57936367.58	34309111.89	50219168.57	45470041.02	47988641.3	39192269.3	67212961.31	82146164.77	85447600.65	60069161.84	73699970.42	101956135	78421998.99	45852599.95	1	1	1.710306484	0.233073942	0.000859706	3.065650042
P04797	Glyceraldehyde-3-phosphate dehydrogenase OS=Rattus norvegicus OX=10116 GN=Gapdh PE=1 SV=3	56	15	304	15	1	333	35.8	8.03	787.45	15	0	102134848.3	113560604.9	92709637.59	109364557.7	130382007.9	96881125.34	197512173.5	222169787	244244716.4	128257872.3	170054198.9	140958387.8	183866189.3	107505463.6	1	1	1.710296232	0.233071339	0.002837067	2.547130408
P62870	Elongin-B OS=Rattus norvegicus OX=10116 GN=Elob PE=1 SV=1	53	5	20	5	1	118	13.2	5.01	42.61	5	0	5149182.512	4840998.297	3557370.233	4327062.614	8298368.559	3965066.453	9290713.616	10322356.81	12227973.79	4478245.248	7438357.69	7784345.923	8590332.18	5023008.112	1	1	1.710196756	0.233046078	0.02014896	1.695747365
P19139	Casein kinase II subunit alpha OS=Rattus norvegicus OX=10116 GN=Csnk2a1 PE=1 SV=2	32	10	58	10	1	391	45	7.74	114.11	10	0	7433661.107	4248097.563	5420415.983	4689352.444	5457920.912	4301952.386	8358183.931	7188893.1	9750310.873	5247819.905	10855139.47	12542947.2	8990549.08	5258566.732	1	1	1.709695728	0.232918827	0.009861726	2.006047068
B2RYP3	Fam91a1 protein OS=Rattus norvegicus OX=10116 GN=Fam91a1 PE=1 SV=1	7	5	23	5	1	838	93.5	6.32	45.57	5	0	2044053.685	1783024.516	1463551.881	1035808.706	2240192.74	1393445.247	3972431.049	1887842.019	3637218.69	1245100.161	2579429.929	3694838.513	2836143.394	1660012.796	1	1	1.708506947	0.232616749	0.036899283	1.432982073
F1LWE6	Musashi RNA-binding protein 2 OS=Rattus norvegicus OX=10116 GN=Msi2 PE=1 SV=3	9	2	5	2	1	278	29.8	9.17	10.06	2	0	179958.7493	271324.1484	325584.2221	478822.3362	519615.1184	218167.3325	529642.22	323324.6226	850209.2644	NA	457173.5134	674803.0788	567030.5399	332245.3178	0.833333333	1	1.706662245	0.232147581	0.048888215	1.310795819
Q9QX81	Heterogeneous nuclear ribonucleoprotein A/B OS=Rattus norvegicus OX=10116 GN=Hnrnpab PE=1 SV=1	17	5	49	5	1	332	36.2	6.95	113.53	5	0	4993491.206	6200832.297	2016250.327	4692421.525	8729639.292	5173316.6	7915214.722	14005121.05	7817538.925	9564967.971	9393148.614	5575228.755	9045203.339	5300991.875	1	1	1.706322808	0.232061196	0.027868315	1.554889289
A0A0H2UHV9	Coatomer subunit gamma OS=Rattus norvegicus OX=10116 GN=Copg2 PE=1 SV=1	19	13	76	11	1	870	97.5	5.74	169.49	13	0	11267735.99	5874263.484	20854607.41	10672554.18	13214194.25	9084208.136	18794173.49	13267401.75	18408932.34	17719006.49	27927936.67	24708929.39	20137730.02	11827927.24	1	1	1.70255782	0.23110187	0.019347936	1.713365358
Q5M7U6	Actin-related protein 2 OS=Rattus norvegicus OX=10116 GN=Actr2 PE=2 SV=1	34	11	208	11	1	394	44.7	6.74	539.35	11	0	43106411.16	41887527.34	34504341.25	46139625.24	45733669.25	39468034.76	47377438.5	42105154.98	89774135.46	87592702.94	83637691.88	76218294.9	71117569.77	41806601.5	1	1	1.70110861	0.230732043	0.007416396	2.129807089
B5DF65	Biliverdin reductase B OS=Rattus norvegicus OX=10116 GN=Blvrb PE=1 SV=1	49	7	97	7	1	206	22.1	6.8	261.97	7	0	21456766.52	30534554.58	33022377.54	29837196.17	33781519.39	26892742.57	39674658.37	79506992.36	64863333.94	47081630.82	33641130.83	33735609.89	49750559.37	29254192.8	1	1	1.70063005	0.230609849	0.025771339	1.588863016
G3V8B6	26S proteasome non-ATPase regulatory subunit 1 OS=Rattus norvegicus OX=10116 GN=Psmd1 PE=1 SV=1	23	16	110	16	1	953	105.6	5.39	262.13	16	0	7156765.64	10832497.66	9252553.379	8953448.416	17924679.53	9571208.351	13854597.23	21253865.35	24028749.1	15326242.55	17625540.74	15638070.56	17954510.92	10615192.16	1	1	1.691397635	0.228245719	0.007972593	2.098400406
A0A0A0MY43	Activating signal cointegrator 1 complex subunit 3 OS=Rattus norvegicus OX=10116 GN=Ascc3 PE=1 SV=1	1	2	8	2	1	2201	250.4	6.92	20.13	2	0	1112577.814	705617.1406	935368.5168	454506.119	981219.3874	746846.8493	1075449.454	1237945.703	1868063.263	1609209.92	NA	1166235.367	1391380.741	822689.3045	0.833333333	1	1.691259062	0.228210137	0.009118719	2.040066167
D3ZZ62	Exportin for tRNA OS=Rattus norvegicus OX=10116 GN=Xpot PE=1 SV=1	3	2	9	2	1	728	83.4	5.47	17.84	2	0	213776.4326	358442.1875	167585.4685	259991.4968	611307.2653	297949.7894	625964.3702	396545.2152	512420.0169	595487.6764	569972.6549	527215.3777	537934.2186	318175.44	1	1	1.690684292	0.228062518	0.012667938	1.897294071
D3ZCZ3	Cystin 1 OS=Rattus norvegicus OX=10116 GN=Cys1 PE=4 SV=1	26	2	7	2	1	145	15.6	5.1	18.3	2	0	985848.1527	847839.125	738805.6247	767388.0484	890259.0575	321809.4659	1210961.048	NA	NA	NA	NA	1352214.483	1281587.765	758658.2457	0.333333333	1	1.689282062	0.22770217	0.024813724	1.605308053
P51607	N-acylglucosamine 2-epimerase OS=Rattus norvegicus OX=10116 GN=Renbp PE=2 SV=2	3	1	1	1	1	430	49.6	5.76	2.63	1	0	171006.8355	145833.5938	212619.8706	208039.9229	238491.7196	125552.0854	265369.4596	NA	364542.0358	184516.4955	422886.9582	311378.9518	309738.7802	183590.6713	0.833333333	1	1.687116115	0.227144974	0.014510563	1.838315737
Q80ZA3	Alpha-2 antiplasmin OS=Rattus norvegicus OX=10116 GN=Serpinf1 PE=1 SV=1	3	1	7	1	1	418	46.4	6.47	13.35	1	0	345543.6696	444323	483625.2393	526417.7544	306311.7359	471816.5349	590990.2773	NA	640023.7496	NA	726287.8771	940667.8279	724492.433	429672.989	0.666666667	1	1.686148423	0.226895801	0.004378852	2.358639733
B5DFB0	Leprecan-like 2 (Predicted), isoform CRA_b OS=Rattus norvegicus OX=10116 GN=P3h3 PE=2 SV=1	5	2	6	2	1	548	62.2	5.4	2.14	2	0	118351.9058	422107.1563	835516.4073	575013.0282	514706.1905	618057.4994	NA	NA	738162.4125	1038873.059	1032349.728	652955.1238	865585.0808	513958.6979	0.666666667	1	1.684152996	0.226381542	0.041235099	1.384732958
Q68FS9	COMM domain containing 10, isoform CRA_a OS=Rattus norvegicus OX=10116 GN=Commd10 PE=1 SV=1	17	3	22	3	1	202	22.8	6.43	34.52	3	0	1938066.39	1314828.891	640448.9967	1082862.882	1536079.244	704546.1491	2013635.959	1379518.342	1710245.55	1771208.018	2477421.995	2800132.516	2025360.397	1202805.426	1	1	1.683863702	0.226306935	0.019494666	1.710084201
Q7TPJ1	Ac2-233 OS=Rattus norvegicus OX=10116 PE=2 SV=1	13	9	64	9	1	1431	161.5	6.54	143.85	9	0	6033175.54	8926918.785	5646437.548	4380858.985	9246993.749	7545984.208	9052712.646	16978737.86	8477086.771	10141595.49	10743993.16	14778648.95	11695462.48	6963394.802	1	1	1.679563318	0.225196381	0.014329293	1.843775237
A0A0G2JX62	SRSF protein kinase 2 OS=Rattus norvegicus OX=10116 GN=Srpk2 PE=1 SV=1	4	2	3	1	1	712	80.5	4.96	8.66	2	0	360037.7812	87200.45313	316724.7109	235205.2735	195809.4215	194329.3266	412037.5123	184370.682	472387.3201	260022.9322	441299.6137	562160.1774	388713.0396	231551.1611	1	1	1.678735005	0.224982146	0.047940178	1.319300358
B2RYG6	Ubiquitin thioesterase OTUB1 OS=Rattus norvegicus OX=10116 GN=Otub1 PE=1 SV=1	33	7	63	7	1	271	31.3	4.94	137.69	7	0	4718895.053	6084924.063	4581267.867	3795834.966	8264715.3	4931781.408	6131023.594	10393970.14	11891268.61	8069954.118	8140398.98	9649614.11	9046038.259	5396236.443	1	1	1.676360618	0.22436745	0.0059999	2.221855988
Q9JK93	Agrin (Fragment) OS=Rattus norvegicus OX=10116 PE=2 SV=1	27	3	40	3	1	142	15.8	5.14	117.6	3	0	6377400.672	5082599.375	4698144.787	4172784.015	5598668.593	4181367.06	6090670.669	NA	11404904.47	7521143.899	6000642.802	10916096.01	8386691.571	5018494.084	0.833333333	1	1.671157011	0.223017255	0.014941482	1.825606324
D4AE96	Importin 7 OS=Rattus norvegicus OX=10116 GN=Ipo7 PE=1 SV=1	14	11	63	11	1	1038	119.4	4.82	147.38	11	0	2589825.327	5317561.25	3435745.947	3772076.917	5315346.273	4005462.029	4857394.843	3024342.479	9434100.916	8770236.414	7768476.527	6978253.704	6805467.481	4072669.624	1	1	1.671008972	0.222978782	0.031006717	1.508544215
F1LU27	Focadhesin OS=Rattus norvegicus OX=10116 GN=Focad PE=1 SV=2	2	3	10	3	1	1798	198.3	6.74	20.75	3	0	1048775.204	732340.7031	852347.9047	1039451.465	1404784.361	718734.6779	909773.1455	1436682.552	1734709.024	2090832.718	1750212.826	1759571.5	1613630.294	966072.386	1	1	1.670299574	0.22279437	0.007770041	2.10957669
Q75WE7	von Willebrand factor A domain-containing protein 5A OS=Rattus norvegicus OX=10116 GN=Vwa5a PE=2 SV=1	27	18	183	18	1	822	91.4	6.64	443.33	18	0	20711631.94	22551358.88	21887281.96	21006577.16	19568737.69	24762434.4	25168983.36	19546821.73	54858884.96	44237593.4	45994163.37	27717576.85	36254003.95	21748003.67	1	1	1.667003762	0.22193658	0.030498703	1.515718629
P17220	Proteasome subunit alpha type-2 OS=Rattus norvegicus OX=10116 GN=Psma2 PE=1 SV=3	12	2	14	2	1	234	25.9	7.43	11.66	2	0	3960457.116	3888404.375	4543733.413	2707159.472	3352723.176	4362883.279	5394445.665	9383933.947	7293220.958	3124662.69	6862541.241	5914914.771	6328953.212	3802560.139	1	1	1.664392667	0.221255794	0.018305488	1.737418689
Q68FR6	Elongation factor 1-gamma OS=Rattus norvegicus OX=10116 GN=Eef1g PE=2 SV=3	26	11	224	11	1	437	50	6.74	483.46	11	0	41527821.17	43001263.69	42012563.73	47207792.61	61850163.32	34388179.19	81382714.29	100631868.1	77544182.26	51092212.23	75416387.38	62163539.52	74705150.63	44997963.95	1	1	1.660189575	0.220157682	0.003684826	2.433583015
A0A0G2K3I9	Dual-specificity phosphatase 3 OS=Rattus norvegicus OX=10116 GN=Dusp3 PE=1 SV=1	36	5	105	5	1	211	23.1	5.85	293.58	5	0	5966366.518	7421555.563	6625510.426	6075806.501	9054856.623	5521792.177	13940171.63	5721482.598	11981110.87	12919795.02	10407049.85	12386836.63	11226074.43	6777647.968	1	1	1.656337787	0.21914891	0.006816697	2.16642601
A0A0G2JZG7	Serine--tRNA ligase, cytoplasmic OS=Rattus norvegicus OX=10116 GN=Sars PE=1 SV=1	24	10	41	10	1	536	61.3	6.86	100.61	10	0	7124580.604	8656641.844	5204859.525	5918235.755	12726426.82	7098023.323	11906787.88	17678894.6	18365982.32	7285529.731	10688012.42	11409392.58	12889099.92	7788127.979	1	1	1.654967658	0.218789511	0.033442964	1.475695239
P16067	Atrial natriuretic peptide receptor 2 OS=Rattus norvegicus OX=10116 GN=Npr2 PE=1 SV=1	2	2	10	1	1	1047	117.1	6.89	24.71	2	0	139408.5842	265523.8125	134243.0599	187121.1526	247535.5929	177282.6766	246804.8726	NA	300791.0074	NA	321424.5684	396492.6012	316378.2624	191852.4798	0.666666667	1	1.649070488	0.21723922	0.00991982	2.003496208
D4AC36	Eukaryotic translation initiation factor 3 subunit F OS=Rattus norvegicus OX=10116 GN=Eif3f PE=1 SV=3	29	8	101	8	1	361	38	5.45	235.49	8	0	31019267.91	20501973.84	17111807.68	14525425.74	18576799.38	11893173.46	34267662.97	22900827.88	46616381.83	27457385.98	23113391.26	32579886.4	31155922.72	18938074.67	1	1	1.645147316	0.216204793	0.022643308	1.645060126
B0BN99	Hmgb3 protein OS=Rattus norvegicus OX=10116 GN=Hmgb3 PE=1 SV=1	7	1	1	1	1	200	23	8.37	2.17	1	0	365403.2094	254318.0313	322501.997	NA	246643.8873	290045.8761	366442.6088	638615.1961	NA	475890.2216	NA	463551.2779	486124.8261	295782.6002	0.666666667	0.833333333	1.6435207	0.215775178	0.010993599	1.958860108
P62755	40S ribosomal protein S6 OS=Rattus norvegicus OX=10116 GN=Rps6 PE=1 SV=1	26	8	143	8	1	249	28.7	10.84	354.82	8	0	105854813.1	69231730.97	53300861.32	72975226.07	70464296.35	66209264.41	111532072.4	168835996.5	102464936.1	74742236.29	123927490	137626855.5	119854931.1	73006032.04	1	1	1.641712716	0.215297162	0.010486767	1.979358381
Q9Z1M9	Structural maintenance of chromosomes protein 1A OS=Rattus norvegicus OX=10116 GN=Smc1a PE=1 SV=1	1	1	3	1	1	1233	143.1	7.64	1.62	1	0	166551.0582	248754.0469	180723.776	145873.6287	149550.8537	262167.8644	289982.3419	196734.8944	NA	446374.8173	236759.6609	402392.8141	314448.9057	192270.2047	0.833333333	1	1.635453118	0.213638099	0.033687792	1.472527453
G3V7G0	Cytoplasmic dynein 1 light intermediate chain 1 OS=Rattus norvegicus OX=10116 GN=Dync1li1 PE=1 SV=1	29	13	135	12	1	523	56.6	6.29	315.3	13	1	22565292.5	21622451.67	16322651.83	19670793.41	18548993.97	14043291.42	35884891.86	8465436.952	46066878.47	34224375.58	29299618.79	30461982.49	30733864.02	18795579.13	1	1	1.635164514	0.213561454	0.045900231	1.338185129
A0A0G2K2P3	TNF alpha-induced protein 8 OS=Rattus norvegicus OX=10116 GN=Tnfaip8 PE=4 SV=1	5	1	5	1	1	192	22.2	8.92	2.14	1	0	215582.6335	190318.4844	NA	159698.7635	193437.9834	274337.3602	214448.937	NA	389654.5136	403201.136	377363.4077	304021.055	337737.8099	206675.045	0.833333333	0.833333333	1.63414896	0.213291642	0.011413551	1.942579216
Q5HZY3	Ubiquitin carboxyl-terminal hydrolase OS=Rattus norvegicus OX=10116 GN=Uchl5 PE=1 SV=1	3	1	1	1	1	324	37.1	5.22	2.59	1	0	327761.1857	516018.625	NA	NA	513085.3115	371431.9969	906194.6682	NA	885280.0062	594865.5007	553139.9996	586281.2951	705152.2939	432074.2798	0.833333333	0.666666667	1.632016361	0.212724508	0.027421054	1.561915856
G3V8T4	DNA damage-binding protein 1 OS=Rattus norvegicus OX=10116 GN=Ddb1 PE=1 SV=1	14	12	46	12	1	1140	126.9	5.26	100.94	12	0	5218221.877	7766178.938	5165528.401	6150953.04	6734985.868	4931044.195	8089331.185	10769291.64	12085172.94	10409554.05	10108685.56	7168646.7	9771780.347	5994485.387	1	1	1.630128312	0.21222179	0.001440486	2.841490958
D4AE88	Family with sequence similarity 120B OS=Rattus norvegicus OX=10116 GN=Fam120b PE=1 SV=1	2	1	3	1	1	785	88.7	6.52	5.96	1	0	277719.3362	174690.8125	167218.7683	119104.1349	247771.4941	114588.6911	356064.8389	193543.7669	326692.786	205310.3332	NA	409967.2735	298315.7997	183515.5395	0.833333333	1	1.625561522	0.211003411	0.043168014	1.364837931
Q0D2L6	Ras-related GTP-binding C OS=Rattus norvegicus OX=10116 GN=Rragc PE=1 SV=1	22	7	39	7	1	398	44.1	5.1	96.32	7	0	5695173.788	4342120.844	8118769.303	5433461.837	3768552.468	5583891.879	7212953.336	3178136.8	12254712.28	12186522	9385454.829	9310931.561	8921451.801	5490328.353	1	1	1.624939571	0.210837215	0.047553792	1.322814846
B3DMA5	CCR4-NOT transcription complex, subunit 7 OS=Rattus norvegicus OX=10116 GN=Cnot7 PE=1 SV=1	8	2	13	2	1	285	32.7	4.84	20.92	2	0	793377.3792	594604.7969	433053.5164	627649.0833	924018.6743	522701.2234	941507.7964	1062932.589	1013041.856	731061.6953	1158691.523	1411544.657	1053130.02	649234.1123	1	1	1.622111346	0.210080662	0.006617595	2.179299815
F1LVA9	Dedicator of cytokinesis 5 OS=Rattus norvegicus OX=10116 GN=Dock5 PE=1 SV=2	10	14	76	12	1	1868	214.5	7.69	178.08	14	1	3596678.515	3565578.48	3976200.474	3278195.519	3957388.458	2464375.229	5715464.452	6608897.256	5288304.881	2788537.273	5451645.19	7884058.536	5622817.931	3473069.446	1	1	1.618976533	0.209240554	0.014314618	1.844220237
G3V7W1	Programmed cell death protein 6 OS=Rattus norvegicus OX=10116 GN=Pdcd6 PE=2 SV=1	40	6	63	6	1	191	21.9	5.64	142.3	6	0	15504437.41	21636028.2	12765713.36	15963696.51	13670146.27	16594218.63	21377925.28	19894226.47	29181875.39	32803627	25902508.65	26277586.77	25906291.59	16022373.4	1	1	1.616882278	0.208678401	0.001727727	2.76252488
D3ZQ57	Plexin B2 OS=Rattus norvegicus OX=10116 GN=Plxnb2 PE=1 SV=1	28	39	285	38	1	1841	205.8	5.99	663.25	39	1	36293887.44	43451058.92	39872516.07	32014730.76	46142533.89	51475794.03	52730668.8	37962817.12	93381044.47	63634014.36	79167658.14	75978316.7	67142419.93	41541753.52	1	1	1.6162635	0.208512165	0.014016798	1.853351185
B1H241	Resistance to inhibitors of cholinesterase 8 homolog A (C. elegans) OS=Rattus norvegicus OX=10116 GN=Ric8a PE=1 SV=1	1	1	4	1	1	530	59.8	5.68	1.7	1	0	158118.7451	171875.875	159827.7415	100344.756	114675.5608	160193.4124	294613.1973	367361.954	198283.0086	115495.71	222128.561	198579.6129	232743.674	144172.6818	1	1	1.614339631	0.207994909	0.040265472	1.395067206
G3V887	V-type proton ATPase subunit a OS=Rattus norvegicus OX=10116 GN=Tcirg1 PE=1 SV=1	25	14	146	14	1	834	93.2	6.43	356.47	14	0	8544511.793	12330209	16864342.88	13126665.49	16355277.54	12502377	14276805.33	25235446.07	16477827.22	21713264.27	34831915.77	15886184.24	21403573.82	13287230.62	1	1	1.610837836	0.207051822	0.038155434	1.418443602
B1H248	Vacuolar protein-sorting-associated protein 36 OS=Rattus norvegicus OX=10116 GN=Vps36 PE=1 SV=1	3	1	1	1	1	386	43.7	7.46	2.09	1	0	825972.0943	739499.9375	NA	761212.9765	744734.334	285227.2649	1350661.233	987427.2803	1232148.114	1089845.758	1008543.274	792798.8528	1076904.085	671329.3214	1	0.833333333	1.604136824	0.205241408	0.010096954	1.995809622
A0A0H2UHQ0	4F2 cell-surface antigen heavy chain OS=Rattus norvegicus OX=10116 GN=Slc3a2 PE=1 SV=1	33	13	194	13	1	566	61.8	5.19	518.58	13	0	36091730.31	34117941.46	45150216.74	41347018.09	47634258.36	48259773.16	48733103.27	32327871.13	96699559.66	72464713.17	81158673.48	73606307.96	67498371.44	42100156.35	1	1	1.603280778	0.205009586	0.02661347	1.574898496
F1LRB8	S-adenosylmethionine synthase OS=Rattus norvegicus OX=10116 GN=Mat2a PE=1 SV=2	13	3	14	1	1	395	43.6	6.37	36.14	3	0	1125333.853	1319929.625	834567.9734	904177.2944	1438970.314	1103156.992	2143423.99	1391574.787	2062897.056	1427449.844	1763182.734	1970564.416	1793182.138	1121022.675	1	1	1.599594885	0.204010007	0.002029533	2.692603883
P50503	Hsc70-interacting protein OS=Rattus norvegicus OX=10116 GN=St13 PE=1 SV=1	24	9	67	9	1	368	41.3	5.39	145.15	9	0	16628417.83	19104228.88	15006518.65	12343227.56	26088679.69	13666419.44	33389433.88	40654139.87	18376652.35	30707840.14	21715763.5	19494649.79	27389746.59	17139582.01	1	1	1.598040523	0.203587788	0.033906439	1.469717819
A0A0G2KAE1	LIM and senescent cell antigen-like-containing domain protein OS=Rattus norvegicus OX=10116 GN=Lims2 PE=1 SV=1	25	7	45	3	1	341	38.9	8.03	105.9	7	0	2005161.761	2767040.531	1513200.972	1517996.751	1751020.058	1426685.682	3294652.217	3285701.646	3217783.371	1426269.689	3010636.728	3306278.547	2923553.7	1830184.292	1	1	1.597409459	0.203416252	0.013704807	1.863127076
G3V8G2	Proteasome (Prosome, macropain) 26S subunit, non-ATPase, 5 (Predicted), isoform CRA_a OS=Rattus norvegicus OX=10116 GN=Psmd5 PE=1 SV=1	35	14	97	14	1	504	55.8	5.27	229.32	14	0	8254035.054	11612656.26	9359632.967	9928100.147	13344828.84	11756102.44	17128022.61	24090819.15	22874780.11	14596964.97	10946785.85	12996096.27	17105578.16	10709225.95	1	1	1.597274933	0.203379676	0.019946882	1.700124981
Q68FR9	Elongation factor 1-delta OS=Rattus norvegicus OX=10116 GN=Eef1d PE=1 SV=2	40	9	165	9	1	281	31.3	5.06	478.97	9	0	36731623.37	36836990.59	38869169.23	47188375.01	57032244.28	41085783.59	72680851.06	63706461.7	64955836.4	56978156.48	81163789.36	71693751.5	68529807.75	42957364.34	1	1	1.59529824	0.202841886	0.000294598	3.530770206
Q62720	Zinc transporter 1 OS=Rattus norvegicus OX=10116 GN=Slc30a1 PE=2 SV=1	5	2	4	2	1	507	55.1	6.44	10.27	2	0	1729557.861	2338706.125	1701132.508	1830740.459	2324278.581	2497344.523	2080535.77	5550007.022	2963549.759	3203270.43	3091448.065	2914916.341	3300621.231	2070293.343	1	1	1.594277083	0.202563803	0.03356931	1.474057585
P40329	Arginine--tRNA ligase, cytoplasmic OS=Rattus norvegicus OX=10116 GN=Rars PE=1 SV=2	41	23	166	23	1	660	75.8	7.05	337.01	23	0	18759733.56	29072550.79	24198744.55	18969254.17	44453610.78	17722782.67	35498737.19	42597016.97	65120041.46	26929771.38	37115598.36	36629568.98	40648455.72	25529446.09	1	1	1.592218475	0.202002659	0.04911132	1.308818393
F1LZ05	Poly [ADP-ribose] polymerase OS=Rattus norvegicus OX=10116 GN=Parp14 PE=1 SV=2	12	17	124	17	1	1787	199.4	6.89	252.69	17	0	7635083.105	10256338.71	7774116.423	7128718.384	12277288.28	11456445.98	16479381.85	13208436.96	13839810.87	11625292.48	15736023.1	18700010.5	14931492.63	9421331.814	1	1	1.584860073	0.199990924	0.002456503	2.609682701
A0A0G2K9A2	Arp2/3 complex 34 kDa subunit OS=Rattus norvegicus OX=10116 GN=Arpc2 PE=1 SV=1	35	12	248	12	1	300	34.3	7.36	569.53	12	0	79755017.54	76318174.34	56223046.06	63138941.13	81161818.28	65318677.7	88561683.36	81991002.48	145082308.2	98786207.45	135906197.3	117812250.1	111356608.1	70319279.18	1	1	1.583585746	0.199641584	0.004632371	2.334196666
B1WC44	60S ribosomal export protein NMD3 OS=Rattus norvegicus OX=10116 GN=Nmd3 PE=2 SV=1	2	1	2	1	1	503	57.7	7.25	4.42	1	0	8008431.644	5543765.5	6498278.71	6734997.932	5535701.985	7389407.234	8079299.289	10149819.22	6561203.99	18224645.33	10861267.98	8961202.792	10472906.43	6618430.501	1	1	1.582385194	0.199312211	0.048703764	1.312437474
D4A9N5	Tripartite motif-containing 25 OS=Rattus norvegicus OX=10116 GN=Trim25 PE=1 SV=3	44	21	245	21	1	643	71.9	8.28	667.26	21	0	41803718.76	21374167.9	25438515.51	24153857.65	32929792.03	20606675.8	58209423.29	45494036.93	39738454.7	20368580.33	38288684.69	60409641.11	43751470.17	27717787.94	1	1	1.578461826	0.198234083	0.041811805	1.378701084
Q6PCT9	Proteasome (Prosome, macropain) 26S subunit, non-ATPase, 6 OS=Rattus norvegicus OX=10116 GN=Psmd6 PE=1 SV=1	30	13	75	13	1	389	45.6	5.52	174.85	13	0	5557186.26	8128531.422	8095148.633	8141354.545	11688329.51	7177673.539	5655490.635	17220514.3	16740926.95	13688580.69	13549031.45	10126794	12830223	8131370.651	1	1	1.577867195	0.198070447	0.037182954	1.429656111
G3V8S8	Oxysterol-binding protein OS=Rattus norvegicus OX=10116 GN=Osbpl5 PE=1 SV=1	5	3	5	3	1	898	101.6	7.91	11.27	3	0	452523.5344	604014.8359	580783.7581	527274.4006	755676.9593	643450.863	988034.7529	NA	862497.2319	442906.2125	1094184.962	1285752.45	934675.1218	593954.0585	0.833333333	1	1.573648851	0.196907829	0.033253914	1.478157231
B2RZ66	Signal recognition particle 19 OS=Rattus norvegicus OX=10116 GN=Srp19 PE=1 SV=1	47	5	41	5	1	144	16.1	9.85	133.27	5	0	7119875.729	4750061.75	5170654.255	3237931.075	5227202.258	3238406.962	8595577.184	8537853.077	5118611.971	5422882.458	8080084.074	9404693.69	7526617.076	4790688.672	1	1	1.571092925	0.196201873	0.015986823	1.796237833
A0A0G2JYA4	Serine/threonine-protein phosphatase OS=Rattus norvegicus OX=10116 GN=LOC100362453 PE=3 SV=1	46	9	100	1	1	309	35.5	5.43	262.56	9	0	1100637.417	1684884.125	928701.1126	1012348.133	2506187.083	1158391.301	1853091.055	2145929.949	2755153.943	2105939.32	1837167.979	2478715.349	2195999.599	1398524.862	1	1	1.570225642	0.195962065	0.019564415	1.708533134
P63245	Receptor of activated protein C kinase 1 OS=Rattus norvegicus OX=10116 GN=Rack1 PE=1 SV=3	75	16	404	16	1	317	35.1	7.69	1084.79	16	0	128558602.9	80409021.35	139428491.5	129399580.6	81500827.71	81586565.42	110342657.7	236731045	183854002.8	128589241.3	164849549.9	181908296.5	167712465.5	106813848.2	1	1	1.570137845	0.195937782	0.01843191	1.734429659
P41542	General vesicular transport factor p115 OS=Rattus norvegicus OX=10116 GN=Uso1 PE=1 SV=1	28	21	177	21	1	959	107.1	4.96	457.22	21	0	20164999.19	28243831.97	54518087.56	31644684.37	40608082.47	33937192.55	57097733.78	47755395.16	52129790.78	65857925.69	55399727.8	49331612.99	54595364.37	34852813.02	1	1	1.566455033	0.194917932	0.004887676	2.310897591
G3V8J0	SH3 domain-binding protein 4 OS=Rattus norvegicus OX=10116 GN=Sh3bp4 PE=1 SV=1	10	6	14	6	1	961	107.4	7.52	30.34	6	0	3936114.142	2620393.094	3145142.402	3715662.774	3869401.21	5039801.846	5346768.647	3110593.187	9090876.946	6244859.284	4259216.062	6913711.479	5827670.934	3721085.911	1	1	1.566121039	0.194825324	0.045150363	1.345338754
F1MA98	Nucleoprotein TPR OS=Rattus norvegicus OX=10116 GN=Tpr PE=1 SV=1	3	5	18	5	1	2360	267.1	5	42.99	5	0	2107772.392	520303.8438	924067.5151	1349357.816	1097108.663	854338.6368	NA	1749444.237	1918050.648	2173216.847	1752210.735	1346321.22	1787848.738	1142158.144	0.833333333	1	1.565325035	0.194604531	0.04351181	1.361392851
E9PTG5	Pleckstrin homology domain-containing A5 OS=Rattus norvegicus OX=10116 GN=Plekha5 PE=1 SV=2	1	1	2	1	1	1281	145.5	7.31	5.37	1	0	474872.1207	512736.9063	435367.61	396923.76	403844.6107	441266.7561	864446.788	660943.7764	NA	554353.5759	NA	NA	693248.0468	444168.6273	0.5	1	1.560776705	0.193340774	0.006463508	2.189531709
A0A0G2JY48	Eph receptor B2 OS=Rattus norvegicus OX=10116 GN=Ephb2 PE=1 SV=1	2	2	17	1	1	986	109.8	5.71	34.14	2	0	NA	228097.2813	379175.0607	295759.913	295993.5185	297640.7565	356416.8202	NA	505139.4311	NA	414250.8302	589599.8557	466351.7343	299333.306	0.666666667	0.833333333	1.557968074	0.192558554	0.015539156	1.808572573
Q8CHN6	Sphingosine-1-phosphate lyase 1 OS=Rattus norvegicus OX=10116 GN=Sgpl1 PE=2 SV=1	19	8	93	8	1	568	63.7	9.17	229.19	8	0	12791407.14	9208649.359	12514665.67	8372476.717	7623139.885	7327462.558	10982709.07	13992042.93	12317448.72	12230421.24	24895084.93	15417476.53	14972530.57	9639633.555	1	1	1.553226114	0.191234684	0.043302103	1.363491011
M0R5J4	Uncharacterized protein OS=Rattus norvegicus OX=10116 PE=3 SV=1	48	17	260	16	1	434	47	6.37	631.41	17	1	77426413.98	91209953.75	71320787.34	82260163.98	124774606.7	72279992.81	136507557.5	186691494.3	151553231.3	134820099.4	123820634.1	72425124.82	134303023.6	86545319.75	1	1	1.551823067	0.190842203	0.020255696	1.69345283
B5DF74	Oxysterol-binding protein OS=Rattus norvegicus OX=10116 GN=Osbpl11 PE=1 SV=1	3	2	20	2	1	754	83.9	7.18	32.38	2	0	1189485.061	1022435.969	924505.4179	1268249.491	1266394.697	736995.8602	1722006.461	1291961.867	2306953.233	1118385.137	1651663.874	1832920.307	1653981.813	1068011.083	1	1	1.548656039	0.18995497	0.012253854	1.911727298
P18421	Proteasome subunit beta type-1 OS=Rattus norvegicus OX=10116 GN=Psmb1 PE=1 SV=3	39	7	67	7	1	240	26.5	7.36	161.86	7	0	14345419.33	15873605.59	10374785.12	10669310.16	18188651.11	10836812.54	17770056.4	34210858.98	21010889.17	15786142.47	19367908.32	16172142.01	20719666.22	13381430.64	1	1	1.548389464	0.189880208	0.040150044	1.396313974
Q5RJN3	C-C motif chemokine ligand 21 OS=Rattus norvegicus OX=10116 GN=Ccl21 PE=2 SV=1	20	3	17	3	1	133	14.7	9.8	34.95	3	0	1603716.548	1393562.926	1517794.219	1733510.009	1350448.19	1987260.28	2212039.718	NA	2602373.865	2008445.225	2882573.807	2632561.046	2467598.732	1597715.362	0.833333333	1	1.544454532	0.188775127	0.000846053	3.07260243
D3ZT01	Component of oligomeric golgi complex 2 OS=Rattus norvegicus OX=10116 GN=Cog2 PE=1 SV=1	11	6	20	6	1	730	81.8	6.6	27.31	6	0	893942.9236	1249751.75	1277121.87	973834.2974	1425862.199	825818.5912	1997795.803	1498739.665	1617880.25	1357329.965	1700903.742	2085242.212	1709648.606	1107721.939	1	1	1.543391484	0.1884761	0.002702016	2.568312084
D4A3V3	Poly (ADP-ribose) polymerase family, member 12 OS=Rattus norvegicus OX=10116 GN=Parp12 PE=1 SV=2	14	8	29	8	1	706	79.4	8.51	68.46	8	0	4897276.306	3213268.766	4029108.068	2122273.211	3990265.271	4432798.191	6080890.152	5066375.824	6408878.864	3543949.446	6423916.507	7481568.826	5834263.27	3780831.635	1	1	1.543116391	0.188398684	0.013544293	1.86824366
Q6P502	T-complex protein 1 subunit gamma OS=Rattus norvegicus OX=10116 GN=Cct3 PE=1 SV=1	51	24	276	24	1	545	60.6	6.64	642.92	24	0	60439562.51	65336097.97	69802841.7	69317901.02	83520381.24	61783874.29	96293915.94	160167806	115156527.1	82440474.77	83752215.06	92472741.62	105047280.1	68366776.46	1	1	1.536525276	0.186539709	0.014928607	1.825980715
G3V6B0	Pyridoxal-dependent decarboxylase domain-containing 1 OS=Rattus norvegicus OX=10116 GN=Pdxdc1 PE=1 SV=1	17	12	55	12	1	785	86.9	5.53	128.98	12	0	8891224.962	11115536.79	21208424.04	12325600.27	12106227.49	13574982.75	16597174.43	24864154.63	28888403.04	15056532.55	20262936.33	16052838.15	20287006.52	13203666.05	1	1	1.536467709	0.186523437	0.032049372	1.494180476
Q68G11	Casein kinase II subunit beta OS=Rattus norvegicus OX=10116 GN=Csnk2b PE=1 SV=2	23	4	43	4	1	215	24.9	5.55	100.43	4	0	5587620.771	4252969.266	4409933.912	4330319.29	5667234.386	3146901.894	9820210.596	9067294.548	6765815.322	3988589.185	6139684.515	6244196.703	7004298.478	4565829.92	1	1	1.534069074	0.185844915	0.028123943	1.550923791
Q9ES53	Ubiquitin recognition factor in ER-associated degradation protein 1 OS=Rattus norvegicus OX=10116 GN=Ufd1 PE=1 SV=1	5	1	1	1	1	307	34.5	6.7	2.41	1	0	247487.317	439185.6875	495112.953	509617.6884	NA	256480.7567	578011.714	515873.2498	474362.4361	658082.6864	NA	752126.8528	595691.3878	389576.8805	0.833333333	0.833333333	1.529072739	0.184428146	0.026652432	1.574263156
B5DF89	Cullin-3 OS=Rattus norvegicus OX=10116 GN=Cul3 PE=1 SV=2	18	11	56	11	1	768	88.9	8.48	135.5	11	0	5688540.833	4718356.945	1538036.134	3707064.323	5478089.898	3678908.182	5424701.324	5732190.091	8554425.693	3689001.773	7672135.458	6846815.175	6319878.252	4134832.719	1	1	1.528448351	0.184250768	0.043566499	1.360847339
P84817	Mitochondrial fission 1 protein OS=Rattus norvegicus OX=10116 GN=Fis1 PE=1 SV=1	32	5	106	5	1	152	17	8.53	310.45	5	0	14924072.97	14247014.63	29407463.87	23278498.84	17275536.59	21229337.88	43761708.15	41897928.98	26065660.37	20769111.74	23163767.32	27924140.54	30597052.85	20060320.8	1	1	1.52525242	0.183341723	0.046736103	1.330347503
Q6AYF8	RCG43931 OS=Rattus norvegicus OX=10116 GN=Serpinb9 PE=1 SV=1	30	10	104	9	1	374	42.3	5.86	245.63	10	1	18573393.8	22816954.94	16172573.67	19091441.3	24215154.12	17548199.43	24258156.64	20379083.35	30084795.58	40032851.7	38402855.34	27443575.22	30100219.64	19736286.21	1	1	1.525120751	0.18330423	0.012780416	1.89345501
Q62920	PDZ and LIM domain protein 5 OS=Rattus norvegicus OX=10116 GN=Pdlim5 PE=1 SV=2	23	10	70	10	1	591	63.2	8.38	147.79	10	0	8887013.797	6245651.313	6637203.615	8871817.475	8361339.258	6439866.588	11202358.73	10363819.04	17688738.85	8586597.904	10153943.38	11175688.61	11528524.42	7573815.341	1	1	1.522155466	0.182459012	0.017449131	1.758226197
P62845	40S ribosomal protein S15 OS=Rattus norvegicus OX=10116 GN=Rps15 PE=1 SV=2	18	3	32	3	1	145	17	10.39	96.44	3	0	15408121.42	10586906.64	20647471.61	9905725.162	11839117.79	13702117.44	11415648.14	22305279.18	19028258.86	NA	25952231.1	25226701.12	20785623.68	13681576.68	0.833333333	1	1.519241837	0.181626912	0.041100853	1.386149165
A0A1B0GWQ7	Translin OS=Rattus norvegicus OX=10116 GN=Tsn PE=1 SV=1	16	4	31	4	1	282	31.9	9.2	78.86	4	0	3210738.769	4185902.234	2928267.353	2739371.925	4958194.768	3259212.766	3536946.827	4351472.424	7310359.805	4315035.69	6579486.221	6166037.536	5376556.417	3546947.969	1	1	1.515826131	0.18064939	0.027077232	1.567395734
P27605	Hypoxanthine-guanine phosphoribosyltransferase OS=Rattus norvegicus OX=10116 GN=Hprt1 PE=1 SV=1	50	9	79	9	1	218	24.5	6.54	155.76	9	0	8665418.474	10573054.23	5203486.406	8990593.133	11723946.1	8196897.177	12387273.76	19139204.69	13921539.43	6229694.011	15059314.66	13993277	13455050.59	8892232.587	1	1	1.513124006	0.179874521	0.041098145	1.38617778
P55009	Allograft inflammatory factor 1 OS=Rattus norvegicus OX=10116 GN=Aif1 PE=2 SV=1	7	1	7	1	1	147	16.8	8.27	13.87	1	0	1053378.231	806868.75	907586.1379	1302196.831	960498.1165	1353976.257	1808431.266	1141092.9	1292791.307	1371573.379	1665121.931	2334392.963	1602233.958	1064084.054	1	1	1.505740032	0.177749997	0.022078598	1.656028508
D3ZWG9	Protein prenyltransferase alpha subunit repeat containing 1, isoform CRA_b OS=Rattus norvegicus OX=10116 GN=Ptar1 PE=1 SV=1	3	1	1	1	1	425	48.2	7.12	2.7	1	0	66123.73167	69330.21875	NA	NA	101529.1069	NA	NA	102665.3091	114830.3774	124013.5132	132778.2502	NA	118571.8625	78994.35244	0.666666667	0.5	1.501016957	0.176385598	0.02250951	1.647633959
Q07014	Tyrosine-protein kinase Lyn OS=Rattus norvegicus OX=10116 GN=Lyn PE=1 SV=3	57	28	464	25	1	512	58.6	7.11	1093.11	28	3	248926908.7	282940035	234875235.9	207813782.3	298021308.9	255782214.5	176508507.6	33392967.29	208380748.7	122420556.9	207027243.5	270541457.6	169711913.6	254726580.9	1	1	0.666251292	-0.176361936	0.040553174	1.391975149
B4F7A5	CD99 molecule (Xg blood group) OS=Rattus norvegicus OX=10116 GN=Cd99 PE=1 SV=1	25	3	39	3	1	165	16.6	5.12	104.86	3	0	48943203.33	52436861.33	50980415.32	47839677.85	48595352.16	45223939.72	50236058.22	7929332.399	50068774.48	30833785.59	20930323.6	35348578.53	32557808.8	49003241.62	1	1	0.664401124	-0.177569642	0.037021309	1.43154823
D3Z865	Mannose-P-dolichol utilization defect 1 OS=Rattus norvegicus OX=10116 GN=Mpdu1 PE=1 SV=1	4	1	20	1	1	247	26.5	8.56	39.43	1	0	10010107.26	9767202	13382882.12	8355391.699	7301302.578	11077793.97	2637746.944	8144649.027	4396519.952	6968497.563	8421993.024	9175050.568	6624076.18	9982446.604	1	1	0.663572413	-0.178111677	0.033368504	1.476663264
Q923V4	F-box only protein 6 OS=Rattus norvegicus OX=10116 GN=Fbxo6 PE=1 SV=1	7	2	15	2	1	284	32.8	6.86	29.56	2	0	5110116.677	2891341	3944232.38	4505395.535	2679650.229	3776995.067	2443677.409	1110114.261	3148882.569	2448709.789	2788442.177	3242666.685	2530415.482	3817955.148	1	1	0.66276721	-0.178638986	0.026052121	1.584156913
A0A023IMI9	Transporter 2 ATP-binding cassette sub-family B OS=Rattus norvegicus OX=10116 GN=Tap2 PE=2 SV=1	19	11	70	2	1	703	77.7	6.73	152.48	11	9	29775932.97	29833089.19	31825535.32	25521723.88	36554314.33	32106775.91	15851337.34	5130143.794	21106222.75	16586091.39	32491093.23	31761333.27	20487703.63	30936228.6	1	1	0.66225602	-0.178974085	0.042945509	1.367082246
Q5PQV5	Trophoblast glycoprotein OS=Rattus norvegicus OX=10116 GN=Tpbg PE=1 SV=1	3	1	4	1	1	426	46.5	6.92	10.34	1	0	431051.6397	747395.5	512328.2243	759483.6585	695471.7113	609424.1138	430222.2693	NA	448280.8361	382693.8521	400640.1309	410369.5416	414441.326	625859.1413	0.833333333	1	0.66219585	-0.179013545	0.007064607	2.150911993
F1LPC6	Carboxypeptidase D OS=Rattus norvegicus OX=10116 GN=Cpd PE=1 SV=2	7	6	21	6	1	1378	152.5	6.09	44.12	6	0	2951409.566	2950864.219	3238265.043	4041776.24	3110636.513	3519691.846	3102186.856	1829630.159	1155100.971	1368314.352	2191864.922	3458138.883	2184206.024	3302107.238	1	1	0.661458234	-0.179497573	0.022867272	1.640785642
Q6AYZ4	Serine/threonine-protein phosphatase OS=Rattus norvegicus OX=10116 GN=Ppp1cc PE=2 SV=1	40	13	174	2	1	337	38.5	6.13	423.14	13	0	5345116.916	5247003.219	5303419.367	4695079.038	3506248.11	4916639.58	5079710.078	1034633.773	4101170.656	3874436.399	2733719.501	2363967.47	3197939.646	4835584.372	1	1	0.661334681	-0.179578702	0.031308901	1.504332177
Q5M9H2	Acyl-Coenzyme A dehydrogenase, very long chain OS=Rattus norvegicus OX=10116 GN=Acadvl PE=1 SV=1	58	32	312	32	1	655	70.8	8.81	770.28	32	0	67461728.57	93646425.2	112357773.4	132363955.1	95686776.9	79277502.51	45829447.08	101450578.9	45544873.37	85499042.29	54873807.16	50485159.62	63947151.41	96799026.94	1	1	0.660617709	-0.180049788	0.035505237	1.449707584
A0A0G2KA25	Transmembrane 9 superfamily member OS=Rattus norvegicus OX=10116 GN=Tm9sf4 PE=1 SV=1	23	13	131	13	1	643	74.7	7.06	281.92	13	0	41597272.91	45545148.06	54692252.51	41347345.64	49263762.92	57876086.53	15829783.77	36257512.35	29810697.91	33159172.27	44830628.31	31788657.04	31946075.27	48386978.1	1	1	0.660220508	-0.18031099	0.006316281	2.199538557
Q5XI78	2-oxoglutarate dehydrogenase, mitochondrial OS=Rattus norvegicus OX=10116 GN=Ogdh PE=1 SV=1	47	45	703	45	1	1023	116.2	6.77	1667.41	45	0	173132793.5	254940376.6	293011608.5	262817558.5	238605571.9	222588122.8	155752322.6	88595977.36	113815540.6	176883404.5	249765678.8	169012198.3	158970853.7	240849338.6	1	1	0.660042725	-0.180427951	0.015963356	1.796875801
P52944	PDZ and LIM domain protein 1 OS=Rattus norvegicus OX=10116 GN=Pdlim1 PE=1 SV=4	43	10	88	10	1	327	35.6	7.24	214.25	10	0	18752524.54	21018054.84	19670146.15	13930146.43	21517623.69	20849116.61	19275027.36	8600896.843	14938847.66	8080727.094	10859107.15	14539060.62	12715611.12	19289602.04	1	1	0.659195099	-0.18098603	0.0107668	1.967913354
P62747	Rho-related GTP-binding protein RhoB OS=Rattus norvegicus OX=10116 GN=Rhob PE=1 SV=1	37	7	78	5	1	196	22.1	5.24	209.81	7	0	16489853.81	19910802.13	19115986.29	13980188.5	20123309.76	22179516.88	13758033.68	2458822.542	16642929.56	9258765.871	15660237.86	15790452.06	12261540.26	18633276.23	1	1	0.658045322	-0.181744194	0.030957783	1.509230148
B1H270	Succinate--CoA ligase [GDP-forming] subunit beta, mitochondrial OS=Rattus norvegicus OX=10116 GN=Suclg2 PE=2 SV=1	42	15	146	15	1	434	47	7.72	342.49	15	0	43156223.57	71121544.11	86024791.05	89327895.75	73250184.96	67592287.56	30269531.61	68310815.11	26422955.74	76703874.11	48494629.37	32616120.2	47136321.02	71745487.83	1	1	0.656993526	-0.18243891	0.048443699	1.314762703
F1LRJ9	Methanethiol oxidase OS=Rattus norvegicus OX=10116 GN=Selenbp1 PE=1 SV=2	54	23	303	23	1	496	55.1	6.86	646.47	23	0	82811429.16	107130524.4	115040903.1	106989017.9	126266757	88481376.7	90464930.26	39165291.83	70769417.56	42265426.93	84242913.41	84142068.69	68508341.45	104453334.7	1	1	0.655875101	-0.183178856	0.009964159	2.001559351
Q3KRE0	ATPase family AAA domain-containing protein 3 OS=Rattus norvegicus OX=10116 GN=Atad3 PE=1 SV=1	23	12	57	12	1	591	66.7	9.29	129.83	12	0	12967607.27	16073431.59	23282757.2	22604344.3	15451508.31	13848426.48	10909157.75	11520951.88	7025718.529	9945784.411	17300490.83	11629816.47	11388653.31	17371345.86	1	1	0.65559994	-0.183361095	0.025395144	1.59524932
Q5I0D1	Glyoxalase domain-containing protein 4 OS=Rattus norvegicus OX=10116 GN=Glod4 PE=1 SV=1	33	8	47	8	1	298	33.2	5.27	102.24	8	0	6059873.881	7353991.781	10155062.98	8147225.108	9650367.063	6693241.23	7200433.81	2655916.5	6611771.442	3710559.203	6540851.038	4751283.867	5245135.977	8009960.34	1	1	0.65482671	-0.183873614	0.01988614	1.701449507
F1LU71	Methylglutaconyl-CoA hydratase, mitochondrial OS=Rattus norvegicus OX=10116 GN=Auh PE=1 SV=2	17	4	34	4	1	315	33.3	9.42	75.43	4	0	6791905.293	8427524.516	8671086.617	11083045.81	10152391	7815256.2	6982997.527	4687847.983	6007551.456	4441839.843	5684004.833	6835465.897	5773284.59	8823534.905	1	1	0.654305179	-0.184219642	0.002687222	2.570696454
D4ABI7	Very-long-chain (3R)-3-hydroxyacyl-CoA dehydratase OS=Rattus norvegicus OX=10116 GN=Hacd3 PE=1 SV=2	28	10	124	10	1	362	43.1	9.04	263.62	10	0	55241227.71	51386660.44	72082503.65	57700181.14	72627517.79	73871234.21	20802223.68	55172754.9	32722922.37	44739139.91	51996379.36	43972647.21	41567677.9	63818220.82	1	1	0.651344982	-0.186188928	0.007494192	2.125275185
Q66H12	Alpha-N-acetylgalactosaminidase OS=Rattus norvegicus OX=10116 GN=Naga PE=2 SV=1	23	9	145	9	1	415	46.8	5.86	349.9	9	0	32043749.59	42129903.72	33312158.29	49797812.65	39951924.99	44328956.7	13822287.6	30079657.27	13541701.46	31628871.18	41000802.04	27203975.41	26212882.49	40260750.99	1	1	0.651077833	-0.186367091	0.021858047	1.660388645
D3ZSU7	Migration and invasion enhancer 1 OS=Rattus norvegicus OX=10116 GN=Mien1 PE=1 SV=2	10	1	2	1	1	115	12.3	4.51	4.16	1	0	561817.8861	581879.375	598452.76	753194.4643	NA	504896.0006	283761.1644	NA	543109.7925	344615.8099	NA	NA	390495.5889	600048.0972	0.5	0.833333333	0.650773814	-0.186569931	0.038741305	1.411825754
A0A140UHX9	CCZ1 homolog B, vacuolar protein-trafficking and biogenesis-associated OS=Rattus norvegicus OX=10116 GN=Ccz1b PE=1 SV=1	13	5	33	5	1	480	55.6	6.02	78.85	5	0	3276242.96	4426937.938	4472677.998	4839243.746	5222892.53	4835390.243	2783945.626	1595506.57	3460656.424	3745735.124	2882707.543	3131236.906	2933298.032	4512230.902	1	1	0.650077112	-0.187035124	0.003210304	2.49345384
B1WBY5	DnaJ (Hsp40) homolog, subfamily C, member 11 OS=Rattus norvegicus OX=10116 GN=Dnajc11 PE=1 SV=1	19	9	31	9	1	559	63.2	8.32	64.17	9	0	8177173.222	9064109.641	11132801.08	9772538.277	7544459.444	7980328.706	5779778.097	5810270.536	5480504.454	4756073.289	7736841.22	5280450.218	5807319.636	8945235.062	1	1	0.649208165	-0.187616027	0.00103558	2.984816346
A0A0G2JVB6	Syntaxin-12 OS=Rattus norvegicus OX=10116 GN=Stx12 PE=1 SV=1	35	8	138	8	1	285	32.5	5.78	352.91	8	0	60449477.21	46293353.25	60479115.44	50424113.16	60558465.27	47953323.59	50953644.44	13321624.15	30402392.34	24475323.22	37691802.92	54736123.16	35263485.04	54359641.32	1	1	0.648707096	-0.187951351	0.021853464	1.660479713
B0BNK1	RAB5C, member RAS oncogene family OS=Rattus norvegicus OX=10116 GN=Rab5c PE=1 SV=1	48	8	229	5	1	216	23.4	8.41	587.73	8	3	101832987.7	108666426.7	98083762.67	93233510.56	124963581.6	93904063.76	63651102.87	29978730.18	75736982.08	53173384.27	86382870.52	93357945.19	67046835.85	103447388.8	1	1	0.648124971	-0.188341246	0.006760387	2.170028442
Q63524	Transmembrane emp24 domain-containing protein 2 OS=Rattus norvegicus OX=10116 GN=Tmed2 PE=1 SV=1	24	4	52	4	1	201	22.7	5.17	138.18	4	0	29118157.18	33512972.02	48990537.8	38004532.95	53559736.57	44288311.02	5373803.918	33569290.69	19103353.62	35602007.23	37997448.88	28559925.65	26700971.66	41245707.92	1	1	0.647363641	-0.188851696	0.044874627	1.347999148
A0A0G2K9L2	Target of myb1-like 2 membrane-trafficking protein OS=Rattus norvegicus OX=10116 GN=Tom1l2 PE=1 SV=1	5	2	17	2	1	528	57.9	4.82	35.03	2	0	1313926.356	1434223.656	1139923.152	1348793.573	1472657.64	1061082.089	758931.5862	413737.0217	953776.4116	980872.5028	869998.9097	1047242.995	837426.5711	1295101.078	1	1	0.646610975	-0.189356928	0.002624851	2.580895344
Q5XIT9	Methylcrotonoyl-CoA carboxylase beta chain, mitochondrial OS=Rattus norvegicus OX=10116 GN=Mccc2 PE=2 SV=1	41	16	158	16	1	563	61.5	8.31	411.99	16	0	23104106.92	33358313.13	46669164.92	45881924.96	38196154.35	26003636.76	16364659.16	32597127.23	11110110.29	30701739.13	29506974.02	17431206.43	22951969.38	35535550.17	1	1	0.645887548	-0.189843088	0.044291358	1.353681004
P62836	Ras-related protein Rap-1A OS=Rattus norvegicus OX=10116 GN=Rap1a PE=1 SV=1	67	14	212	4	1	184	21	6.67	542.26	14	10	326205066.5	268872136.9	196222126.4	188555800.7	241588289.1	250330331.8	247831985.6	70502185.81	212398876.3	103876019.3	150933642	164911727.1	158409072.7	245295625.2	1	1	0.645788414	-0.189909751	0.02823281	1.549245895
A0A0G2K8D1	Motile sperm domain-containing 2 OS=Rattus norvegicus OX=10116 GN=Mospd2 PE=1 SV=1	17	8	30	8	1	518	59.7	5.85	60.94	8	0	16443925.52	17487575	24048845.59	18927461.56	17619245.44	18680434.83	8386723.673	6222024.422	14689846.18	20613731.83	12137044.58	11058208.44	12184596.52	18867914.66	1	1	0.645783954	-0.18991275	0.01720428	1.764363498
P07943	Aldose reductase OS=Rattus norvegicus OX=10116 GN=Akr1b1 PE=1 SV=3	52	15	178	13	1	316	35.8	6.71	378.86	15	2	108869883.2	95403051.47	100869631.4	105540840	144538112.9	95827042.65	82118780.34	50830312.12	96626349.05	47700821.28	57541214.33	84826934.56	69940735.28	108508093.6	1	1	0.64456699	-0.19073194	0.0064418	2.190992763
D4A5I9	Myosin VI OS=Rattus norvegicus OX=10116 GN=Myo6 PE=1 SV=3	28	27	166	27	1	1285	148	8.41	417.37	27	0	45598994	53482778.11	36715598.73	40980422.55	59537893.45	48122841.79	35871081.24	14481339.36	35087184.32	28453834.63	26749951.28	42499422.52	30523802.22	47406421.44	1	1	0.643874844	-0.191198542	0.008799204	2.055556614
A0A0G2K516	Syntaxin 11 OS=Rattus norvegicus OX=10116 GN=Stx11 PE=3 SV=1	27	6	25	6	1	287	33.2	6.65	61.01	6	0	5006609.839	6645000.953	6193807.476	4766563.889	6048690.118	6565752.46	3689449.804	NA	4135552.724	3354740.832	3713306.188	4006226.296	3779855.169	5871070.789	0.833333333	1	0.643810185	-0.191242157	0.000382894	3.416921439
Q5FVQ8	NLR family member X1 OS=Rattus norvegicus OX=10116 GN=Nlrx1 PE=2 SV=1	28	21	177	21	1	973	107.5	7.56	393.56	21	0	16692386.02	24346975.92	38478411.4	27356156.04	26472646.25	26219203.16	15472289.38	8732405.187	8376971.459	23839955.37	26455372.3	19851165.9	17121359.93	26594296.47	1	1	0.64379819	-0.191250249	0.04862431	1.313146548
F1LN92	AFG3-like matrix AAA peptidase subunit 2 OS=Rattus norvegicus OX=10116 GN=Afg3l2 PE=1 SV=1	27	18	155	16	1	802	89.3	8.6	374.62	18	2	41357675.1	49978298.18	65155049.46	53836727.58	55377136.83	45640044.15	27683762.31	10082124.14	29230327.72	48310052.39	48690015.84	35773448.63	33294955.17	51890821.88	1	1	0.641634762	-0.192712115	0.02151668	1.667224739
D3ZRC4	Patatin-like phospholipase domain-containing 8 OS=Rattus norvegicus OX=10116 GN=Pnpla8 PE=1 SV=1	14	8	30	8	1	776	87.9	9.07	76.9	8	0	4333947.01	6429554.494	9065818.262	6602223.952	7980551.342	5612296.244	2655542.231	6077388.557	2414723.543	5154655.747	4195776.911	5125304.714	4270565.284	6670731.884	1	1	0.640194413	-0.19368812	0.025036941	1.601418734
A0A0G2JT24	Uncharacterized protein OS=Rattus norvegicus OX=10116 GN=Ankdd1b PE=4 SV=1	3	1	1	1	1	394	43.5	7.61	0	1	0	115337738.9	114320184	141244501.2	167307210.4	94050337.16	139037355.9	46916505.04	107747391.1	62870091.49	106556913.7	101870328.3	67706515.37	82277957.49	128549554.6	1	1	0.640048561	-0.193787074	0.011781135	1.928812867
Q91ZQ0	Vacuole membrane protein 1 OS=Rattus norvegicus OX=10116 GN=Vmp1 PE=1 SV=1	2	1	19	1	1	406	45.9	6.74	28.68	1	0	1768033.123	1867259.125	1908408.461	2095987.776	2169250.912	2026058.258	683829.9217	1621222.112	1410209.701	963889.7622	1456688.265	1438631.591	1262411.892	1972499.609	1	1	0.640006156	-0.193815849	0.001197517	2.921718313
Q6PCU4	Emd protein OS=Rattus norvegicus OX=10116 GN=Emd PE=1 SV=1	42	8	25	8	1	260	29.6	5.19	50.4	8	0	8931263.687	7678667.313	7749542.33	7207833.417	10616706.62	9326977.195	2377063.249	4043060.633	4510439.245	8866270.353	6343163.616	6823703.289	5493950.064	8585165.094	1	1	0.639935284	-0.193863944	0.016740238	1.776238372
Q63483	RAB38, member RAS oncogene family OS=Rattus norvegicus OX=10116 GN=Rab38 PE=1 SV=1	21	4	35	3	1	211	23.8	7.77	83.54	4	0	2427071.694	2446489.313	2967495.3	2657391.257	4260236.354	2978377.15	1676708.552	1642687.629	518432.066	2813900.808	2033801.996	2639788.846	1887553.316	2956176.845	1	1	0.638511637	-0.194831183	0.034851399	1.457779784
A0A0G2K8R3	LIM domain 7 OS=Rattus norvegicus OX=10116 GN=Lmo7 PE=1 SV=1	31	38	315	38	1	1729	195.6	6.6	832.13	38	0	100282072.9	136901145.6	138267063.8	131472485.4	114867208.1	108000220.7	121656000.6	5560515.56	64978871.11	111866218.3	81404963.08	79756758	77537221.1	121631699.4	1	1	0.63747544	-0.195536543	0.034700015	1.459670337
Q5XIU4	B-cell receptor-associated protein 29 OS=Rattus norvegicus OX=10116 GN=Bcap29 PE=1 SV=1	15	5	31	5	1	241	28.2	9.66	64.71	5	0	16227019.11	18564450.5	21545299	18852408.32	18787703.86	16299356.77	8818512.156	3513557.541	12393327.14	12563092.44	18887339.77	13992311.59	11694690.11	18379372.93	1	1	0.636294293	-0.196341972	0.014255728	1.8460106
Q63355	Unconventional myosin-Ic OS=Rattus norvegicus OX=10116 GN=Myo1c PE=1 SV=2	47	44	741	44	1	1044	119.7	9.39	1825.44	44	0	420001010.8	469692435.7	333879482.6	306302738.1	389951195.5	362324578.1	374672092.8	29499155.72	265870529.8	137972805.4	299270615.8	343538232.5	241803905.3	380358573.4	1	1	0.635726186	-0.196729899	0.041475904	1.382204139
Q7M0E3	Destrin OS=Rattus norvegicus OX=10116 GN=Dstn PE=1 SV=3	36	6	97	6	1	165	18.5	8.03	275.19	6	0	54302748.06	81148415.88	87772088.06	59449407.48	70498896.7	62945332.45	55981994.49	16414751.64	52795820.59	29701163.46	54295846.3	54967139.68	44026119.36	69352814.77	1	1	0.634813735	-0.197353685	0.015318636	1.814779903
P39052	Dynamin-2 OS=Rattus norvegicus OX=10116 GN=Dnm2 PE=1 SV=1	38	29	387	16	1	870	98.2	7.43	885.73	29	13	167159113	148316975.2	204662176.1	234199071.3	163475827.4	145666661.1	123366184.9	75874477.9	115220605.6	88442810.54	122806801.4	149100915.4	112468632.6	177246637.3	1	1	0.634531827	-0.19754659	0.004698376	2.328052231
Q6AXV4	Sorting and assembly machinery component 50 homolog OS=Rattus norvegicus OX=10116 GN=Samm50 PE=1 SV=1	41	14	182	14	1	469	51.9	6.8	409.62	14	0	45378999.02	70636693.66	68148883.93	58949811.47	67087816.02	52190182.37	36944808.58	17292439.49	21847656.56	50272595.48	58880168.02	44585508.88	38303862.83	60398731.08	1	1	0.634183238	-0.197785241	0.017763669	1.750467328
D3ZJF9	Alpha-galactosidase OS=Rattus norvegicus OX=10116 GN=Gla PE=1 SV=2	23	8	47	8	1	420	47.5	5.72	106.4	8	0	7631424.633	10502162.47	8450677.061	11584846.03	9567939.123	10236786.46	3483818.215	10017954.89	1998825.736	7844648.78	8719547.226	4683505.701	6124716.758	9662305.963	1	1	0.633877335	-0.197994777	0.032784718	1.484328548
Q9WUD9	Proto-oncogene tyrosine-protein kinase Src OS=Rattus norvegicus OX=10116 GN=Src PE=1 SV=4	24	11	123	6	1	536	59.9	7.42	232.75	11	0	14141632.41	11031970.25	15518960.25	15066422.34	17612522.74	16721978.84	13898560.08	1464912.337	11728138.24	4584259.299	11248862.7	14171908.61	9516106.877	15015581.14	1	1	0.633748823	-0.198082834	0.040725543	1.390133116
B0BN30	Mitochondrial carrier 1 OS=Rattus norvegicus OX=10116 GN=Mtch1 PE=1 SV=1	16	6	42	6	1	389	41.6	9.32	78.84	6	0	17753532.26	18115517.03	26043726.97	25445047.73	23425683.96	17984814.16	6227534.301	18389024.45	13502555.07	11316160.61	17771309.93	14132075.86	13556443.37	21461387.02	1	1	0.631666693	-0.199512022	0.008782687	2.056372594
Q920A6	Retinoid-inducible serine carboxypeptidase OS=Rattus norvegicus OX=10116 GN=Scpep1 PE=2 SV=1	23	9	92	9	1	452	51.1	5.53	183.57	9	0	40049844.24	43243585.53	45642031.48	61260369.63	52182735.89	56455460.47	26792987.61	32134157.29	28428366.7	32035367.78	45996945.46	23121659.88	31418247.45	49805671.21	1	1	0.630816666	-0.200096841	0.00271912	2.565571626
D3ZJ32	Extended synaptotagmin 2 OS=Rattus norvegicus OX=10116 GN=Esyt2 PE=1 SV=3	37	22	246	22	1	845	93.9	8.24	540.03	22	0	130241169.1	150928100.9	92755141.2	113152242.1	83227716.08	105426068.7	117190356.6	14693462.37	94995539.58	42142332.45	77103328.76	79391670.96	70919448.45	112621739.7	1	1	0.629713665	-0.200856882	0.044660977	1.350071781
Q2IBD0	Suppressor of tumorigenicity 7 protein OS=Rattus norvegicus OX=10116 GN=St7 PE=2 SV=1	3	1	22	1	1	577	66.1	7.88	75.35	1	0	933177.7998	544057.6289	870795.9718	449910.3266	430874.6881	951774.1675	584908.6939	491531.5324	449713.4883	477714.6034	202578.5467	425111.8674	438593.122	696765.0971	1	1	0.629470569	-0.201024571	0.046538496	1.332187656
Q9Z270	Vesicle-associated membrane protein-associated protein A OS=Rattus norvegicus OX=10116 GN=Vapa PE=1 SV=3	35	8	235	7	1	249	27.8	8.4	683.82	8	1	140409550.2	134958532.4	169121567	100505769.3	145557652.7	136703246.8	43680117.35	92758168.65	72981846.58	73462887.6	122440561.7	115144287.5	86744644.91	137876053.1	1	1	0.629149464	-0.201246169	0.00677272	2.169236879
Q9WVI4	Guanylate cyclase soluble subunit alpha-2 OS=Rattus norvegicus OX=10116 GN=Gucy1a2 PE=1 SV=2	7	3	12	3	1	730	81.7	7.69	32.82	3	0	1031611.831	1019282.75	528555.6941	853005.9006	1018692.792	881127.6082	569789.885	NA	588668.9297	526868.5429	638657.0468	467696.421	558336.1651	888712.7626	0.833333333	1	0.628252669	-0.201865658	0.005394453	2.268052586
P06302	Prothymosin alpha OS=Rattus norvegicus OX=10116 GN=Ptma PE=1 SV=2	22	5	65	5	1	112	12.4	3.84	176.71	5	0	12531527.85	12665533.42	10464263.67	9652394.263	9987225.461	9204304.799	13884866.87	4029294.501	7589772.682	2686875.965	5426087.749	6877985.146	6749147.152	10750874.91	1	1	0.627776549	-0.202194912	0.041956149	1.377204381
D4IGX4	Alpha-(1,6)-fucosyltransferase (Fragment) OS=Rattus norvegicus OX=10116 GN=Fut8 PE=2 SV=1	5	3	9	3	1	575	66.4	7.52	17.41	3	0	2775911.615	2815663.688	3951321.444	3331920.43	3513809.203	3406648.23	1808604.259	273178.3921	1772288.83	2370985.402	3051163.117	3150465.592	2071114.265	3299212.435	1	1	0.627760202	-0.202206221	0.025652425	1.590871573
Q566C7	Diphosphoinositol polyphosphate phosphohydrolase 1 OS=Rattus norvegicus OX=10116 GN=Nudt3 PE=1 SV=1	6	1	3	1	1	168	19.1	6.34	5.86	1	0	379019.5778	442099.375	628939.9997	437838.6899	426779.4012	NA	279198.6603	251597.793	NA	393817.9974	NA	236798.6993	290353.2875	462935.4087	0.666666667	0.833333333	0.62720043	-0.202593653	0.020512566	1.687980009
A0A0G2K8W9	Spectrin beta chain OS=Rattus norvegicus OX=10116 GN=Sptbn1 PE=1 SV=1	63	125	2407	114	1	2358	273.3	5.64	6363.77	125	11	1244457144	1845925844	1397745625	1299828521	1673192416	1795449575	1033904421	127360724.3	807453584.3	1473621173	1266217955	1089727166	966380837.2	1542766521	1	1	0.626394742	-0.203151896	0.025047058	1.601243279
P36860	Ras-related protein Ral-B OS=Rattus norvegicus OX=10116 GN=Ralb PE=2 SV=1	31	9	196	6	1	206	23.3	6.62	535.31	9	3	89614691.02	78876122.88	64559184.77	62896791.47	63151577.17	80456667.64	60983926.56	13605093.13	71956493.71	37910274.11	37058699.52	53481306.36	45832632.23	73259172.49	1	1	0.625623122	-0.203687209	0.017351909	1.760652739
G3V7A5	Low density lipoprotein receptor, isoform CRA_a OS=Rattus norvegicus OX=10116 GN=Ldlr PE=1 SV=1	3	2	8	2	1	879	96.6	5.05	19.46	2	0	1105374.894	979773.0938	1529289.257	1191299.48	1386970.235	973032.1813	399678.9714	770818.7601	461204.5617	1142392.836	1210498.436	490268.4908	745810.3427	1194289.857	1	1	0.624480178	-0.204481342	0.026463612	1.57735088
Q09073	ADP/ATP translocase 2 OS=Rattus norvegicus OX=10116 GN=Slc25a5 PE=1 SV=3	41	15	336	9	1	298	32.9	9.73	676.98	15	6	1051595820	1183792040	1867854686	1579850212	1072803097	1239738920	521421958.8	899059256.4	555941578	1070537793	1197125158	748534390.4	832103355.8	1332605796	1	1	0.624418233	-0.204524424	0.016081417	1.793675686
A0A0G2JTW9	Beta-globin OS=Rattus norvegicus OX=10116 GN=Hbb-b1 PE=1 SV=1	53	10	598	2	1	147	16	8.06	1396.75	10	0	174555631.3	116426601	126218745	201644373.1	75824449.86	106448083.7	101574427.7	75504175.82	104182315.3	103650246.5	45832248.12	69221477.69	83327481.86	133519647.3	1	1	0.624084047	-0.204756919	0.040008462	1.397848143
Q3MHT2	Cysteine desulfurase, mitochondrial OS=Rattus norvegicus OX=10116 GN=Nfs1 PE=1 SV=1	22	7	43	7	1	459	50.6	8.6	115.14	7	0	13368031.83	14270886.3	14161100.61	20038943.66	12030380.73	13405663.74	16170091.11	9672747.638	7051949.998	6701545.314	5951954.061	8898618.448	9074484.429	14545834.48	1	1	0.623854509	-0.204916682	0.016891401	1.772334328
A0A1S7IVG9	Vitamin K epoxide reductase complex OS=Rattus norvegicus OX=10116 GN=Vkorc1 PE=2 SV=1	8	1	29	1	1	161	17.7	9.13	78.48	1	0	16671645.6	21608024	33024988.65	14713760.19	18488681.17	14885980	7928626.4	13290260.06	11891796.94	9177836.473	14634236.35	17548737.78	12411915.67	19898846.6	1	1	0.623750508	-0.204989088	0.040121707	1.396620598
F1LST4	Microtubule-associated protein OS=Rattus norvegicus OX=10116 GN=Mapt PE=1 SV=1	5	2	6	2	1	752	78.5	6.3	14.78	2	0	3576471.296	2373269.25	2652116.015	2787797.522	3338348.451	2288594.417	2544676.999	387334.6456	1731293.259	1566516.15	2110231.03	2269104.523	1768192.768	2836099.492	1	1	0.623459358	-0.205191852	0.01783523	1.748721286
D3Z9P1	3-ketodihydrosphingosine reductase OS=Rattus norvegicus OX=10116 GN=Kdsr PE=1 SV=1	19	6	90	6	1	332	36	8.29	227.53	6	0	25437111.76	31582110.25	22785538.87	28630881.23	36354655.9	31728449.16	17461570.41	4635845.043	22921490.39	19742038.88	22353072.99	22696567.64	18301764.22	29419791.19	1	1	0.622090215	-0.20614663	0.009710743	2.01274754
D4AA91	Ceramide synthase 5 OS=Rattus norvegicus OX=10116 GN=Cers5 PE=4 SV=1	17	6	29	6	1	449	51.3	8.21	58.76	6	0	4987388.937	4144760.563	6682459.651	3680943.96	6535411.038	7593422.54	2330426.285	2103335.074	3051044.377	3156316.188	4864671.767	5397135.454	3483821.524	5604064.448	1	1	0.621659789	-0.206447223	0.030564737	1.514779337
B2RYF8	Cnpy3 protein OS=Rattus norvegicus OX=10116 GN=Cnpy3 PE=2 SV=1	24	5	18	5	1	276	30.6	6.13	40.92	5	0	5626848.83	4251639.391	6252671.39	7461684.95	5891364.463	5206965.377	3904232.09	5624442.685	1663810.229	2687621.13	3565393.784	4093099.54	3589766.576	5781862.4	1	1	0.620866829	-0.207001543	0.010792809	1.966865509
P54311	Guanine nucleotide-binding protein G(I)/G(S)/G(T) subunit beta-1 OS=Rattus norvegicus OX=10116 GN=Gnb1 PE=1 SV=4	54	13	276	8	1	340	37.4	6	802.1	13	6	491601304.2	626850773	414619686.3	371176079.1	548266219.5	521419565.2	443680480.7	82336820.87	445559209.5	161724857.6	335243272.8	375849781.5	307399070.5	495655604.5	1	1	0.620186815	-0.207477471	0.026656021	1.574204678
Q5FVI3	Leucine-rich repeat-containing protein 57 OS=Rattus norvegicus OX=10116 GN=Lrrc57 PE=2 SV=1	37	8	37	8	1	239	26.7	8.44	85.89	8	0	25294717.44	25307287.31	19617534.95	18029205.36	22586072.7	19796546.7	12738140.51	4936439.334	16591743.83	11339342.75	16558836.01	18691936.51	13476073.16	21771894.08	1	1	0.618966504	-0.208332853	0.006134583	2.212214953
G3V7K5	NPC intracellular cholesterol transporter 1 OS=Rattus norvegicus OX=10116 GN=Npc1 PE=1 SV=1	8	10	74	10	1	1278	142.9	5.53	161.96	10	0	29867865.86	44471539.81	47633931.31	40361358.96	41504074.81	42454424.13	24784081.84	19824835.69	23153175.8	31368279.49	34834769.39	18415454.1	25396766.05	41048865.81	1	1	0.618695926	-0.208522744	0.001498255	2.824414264
B0BN86	Transmembrane protein 11, mitochondrial OS=Rattus norvegicus OX=10116 GN=Tmem11 PE=2 SV=1	18	3	20	3	1	190	21.3	7.36	31.11	3	0	5719482.41	6472862.563	11103094.62	7053926.829	7297845.48	6554308.325	4178075.546	3924945.701	3812009.288	2886250.308	7601609.058	4941473.622	4557393.92	7366920.039	1	1	0.618629481	-0.208569387	0.020833734	1.681232885
Q5XIH7	Prohibitin-2 OS=Rattus norvegicus OX=10116 GN=Phb2 PE=1 SV=1	54	14	205	14	1	299	33.3	9.83	444.84	14	0	111247033.2	159140642.5	205977841.2	189888115.4	167437474.4	169884339.4	73340188.12	167277974	52008697.4	65798467.96	159146150.8	103224437.3	103465985.9	167262574.3	1	1	0.618584201	-0.208601176	0.024252575	1.615242144
B0BNJ4	ETHE1, persulfide dioxygenase OS=Rattus norvegicus OX=10116 GN=Ethe1 PE=1 SV=1	35	6	67	6	1	254	27.7	7.06	172.38	6	0	8081906.067	12540938.66	17013694.49	17954512.84	14055295.55	10563996.12	11421189.56	5352804.501	3984435.463	12741901	8659354.629	7443085.984	8267128.522	13368390.62	1	1	0.618408659	-0.208724438	0.033634265	1.473218058
F1M978	Inositol-1-monophosphatase OS=Rattus norvegicus OX=10116 GN=Impa1 PE=1 SV=1	24	5	24	5	1	277	30.5	5.29	54.72	5	0	4956439.385	7019013.633	7634171.675	6415144.766	5691990.106	5509145.472	5893787.367	697574.8235	5890105.965	2592179.104	4328795.789	3594590.368	3832838.903	6204317.506	1	1	0.617769626	-0.209173449	0.027083458	1.567295886
Q861Q1	MHC class I protein OS=Rattus norvegicus OX=10116 GN=RT1-CE4 PE=3 SV=1	14	5	83	1	1	373	42.1	6.55	181.57	5	0	503392.3202	674324.875	997675.4396	NA	701739.752	569443.1325	631781.6164	NA	358296.4145	264987.8737	348011.0693	523138.7274	425243.1403	689315.1039	0.833333333	0.833333333	0.61690675	-0.209780478	0.040075354	1.397122633
A0A0G2JWJ0	Protein phosphatase 1 regulatory subunit 12A OS=Rattus norvegicus OX=10116 GN=Ppp1r12a PE=1 SV=1	13	10	33	10	1	1032	115.2	5.47	67.08	10	0	10724999.06	13368160.06	7611932.364	6463559.245	10997464.8	10216098.49	7577747.141	1095941.967	8633652.933	8554601.785	4970500.744	5684675.588	6086186.693	9897035.669	1	1	0.614950466	-0.211159865	0.033853508	1.470396322
Q5XIE8	Integral membrane protein 2B OS=Rattus norvegicus OX=10116 GN=Itm2b PE=2 SV=1	24	5	53	5	1	266	30.3	5.3	131.55	5	0	11405115.75	13758007.53	14541299.2	13394030.49	17252705.53	11099270.56	6468380.153	3523638.583	6298336.207	7741067.844	13811993.68	12106783.82	8325033.38	13575071.51	1	1	0.613258897	-0.212356142	0.016804712	1.774568926
F1LPQ9	A-kinase anchor protein 2 OS=Rattus norvegicus OX=10116 GN=Akap2 PE=1 SV=2	38	30	354	30	1	870	95.9	5.17	942.21	30	0	140219136	194821237.7	163047189.5	149532034.4	135214032.6	144947630.5	172508634.6	7927921.906	64819117.64	113563394.2	101164504.5	108054583.9	94673026.12	154630210.1	1	1	0.612254397	-0.213068087	0.032181585	1.49239257
Q6IRK8	Spectrin alpha chain, non-erythrocytic 1 OS=Rattus norvegicus OX=10116 GN=Sptan1 PE=1 SV=1	62	148	2955	3	1	2452	282.2	5.31	8239.46	148	146	1566864798	2252911576	1729210727	1553489034	1849625964	2136835187	1409687482	242715490.8	895336151.3	1597567865	1386573989	1248123440	1130000736	1848156214	1	1	0.611420576	-0.21365995	0.011927459	1.923452068
D3ZQC1	Hexosyltransferase OS=Rattus norvegicus OX=10116 GN=B3galt6 PE=3 SV=1	4	1	2	1	1	325	37.1	8.95	5.73	1	0	694763.9142	797278.1875	1288710.152	NA	1269206.28	1254455.042	479877.9596	375227.8659	678181.1224	769160.9325	716046.7423	871185.9679	648280.0984	1060882.715	1	0.833333333	0.611076125	-0.213904684	0.018621702	1.729980628
A0A0A1FZ38	NADH-ubiquinone oxidoreductase chain 3 OS=Rattus norvegicus OX=10116 GN=ND3 PE=3 SV=1	13	1	32	1	1	115	13.1	4.44	76.53	1	0	3151392.498	3703891.75	5932105.168	6259110.605	4910836.984	4039182.329	1103240.235	3979060.103	1173743.944	2520431.719	4999899.69	3267152.375	2840588.011	4666086.555	1	1	0.608773107	-0.215544541	0.0486725	1.312716346
P05708	Hexokinase-1 OS=Rattus norvegicus OX=10116 GN=Hk1 PE=1 SV=4	30	27	290	25	1	918	102.3	6.71	626.06	27	2	106070004.3	125119924.8	114604493.2	157477351.8	116769173.4	117886077.9	90053431.72	5894519.198	70731696.02	79713678.6	118390711.4	83903852.57	74781314.91	122987837.5	1	1	0.608038294	-0.216069068	0.017429875	1.758705727
Q63635	Syntaxin-6 OS=Rattus norvegicus OX=10116 GN=Stx6 PE=1 SV=1	31	7	57	7	1	255	29	4.88	164.27	7	0	21424380.02	19617568.59	18450916.65	16993126.83	22802184.51	13680628.51	9424049.987	6103649.469	11405193.24	13562999.4	13931948.7	14246395.46	11445706.04	18828134.19	1	1	0.607904423	-0.216164697	0.002689323	2.570357034
B5DEF4	DNA-damage-regulated autophagy modulator 1 OS=Rattus norvegicus OX=10116 GN=Dram1 PE=2 SV=1	6	1	5	1	1	238	26.2	5.74	8.32	1	0	1259974.205	1278567.5	1227511.883	NA	1152566.984	NA	NA	NA	888263.4233	725307.1202	NA	625056.6933	746209.079	1229655.143	0.5	0.666666667	0.60684419	-0.216922802	0.001116438	2.95216539
Q63751	Vomeromodulin OS=Rattus norvegicus OX=10116 GN=Bpifb9 PE=1 SV=2	2	1	1	1	1	589	62.8	5.63	2.53	1	0	4490239.053	4861868	4008478.12	4038357.79	3430593.801	5048478.629	3386884.208	NA	1419092.592	4238267.077	3390108.975	651389.8227	2617148.535	4313002.565	0.833333333	1	0.606804308	-0.216951345	0.031688676	1.499095906
A0A0G2K9V4	Cytohesin-3 OS=Rattus norvegicus OX=10116 GN=Cyth3 PE=4 SV=1	11	5	25	5	1	471	54.8	6.43	30.98	5	0	3834598.726	3217085.188	2900595.961	3145161.717	4193993.569	3426998.447	2877261.236	217961.5129	2327069.114	1711502.787	2454683.35	2969874.47	2093058.745	3453072.268	1	1	0.606143916	-0.21742425	0.014566874	1.836633636
A0A0G2K350	NSF attachment protein gamma OS=Rattus norvegicus OX=10116 GN=Napg PE=1 SV=1	26	8	82	8	1	312	34.6	5.41	179.04	8	0	29778027.71	29201561.5	27028953.9	23289100.4	28387654.4	21898690.44	21166031.5	12196929.79	16023780.97	10135328.54	16832793.04	20140067.99	16082488.64	26597331.39	1	1	0.604665498	-0.218484811	0.000773469	3.111557088
D3ZB81	Solute carrier family 25 member 31 OS=Rattus norvegicus OX=10116 GN=Slc25a31 PE=3 SV=3	12	4	66	1	1	320	35.2	9.6	123.55	4	0	469677.2763	410856.75	763454.0631	673456.1597	NA	490503.3356	NA	248631.7995	370509.6774	310765.9417	473346.0517	294577.9543	339566.2849	561589.5169	0.833333333	0.833333333	0.604652107	-0.218494429	0.020740966	1.68317102
Q63746	NF-kappa-B inhibitor alpha OS=Rattus norvegicus OX=10116 GN=Nfkbia PE=2 SV=1	4	1	2	1	1	314	35	4.78	4.37	1	0	581693.4309	573468.1875	632484.3069	408104.9994	685152.8203	336049.6054	356880.3538	183222.9409	431875.5407	454990.4604	189809.0066	NA	323355.6605	536158.8917	0.833333333	1	0.603096704	-0.219613045	0.026767771	1.572387792
B5DER3	Hypertrophic agonist responsive protein B64, isoform CRA_b OS=Rattus norvegicus OX=10116 GN=Iah1 PE=2 SV=1	10	2	8	2	1	249	28	5.95	17.13	2	0	2115471.344	3038354.438	4639910.674	4465087.194	3863305.772	3643617.286	2199034.522	1760586.672	2517379.568	1436119.784	3216973.408	1994224.649	2187386.434	3627624.451	1	1	0.602980398	-0.219696806	0.01076592	1.967948852
O08815	STE20-like serine/threonine-protein kinase OS=Rattus norvegicus OX=10116 GN=Slk PE=1 SV=1	25	29	367	1	1	1206	137.8	5.02	1026.72	29	28	144133260.1	139230200.1	153176813.6	157394111.3	149024939.5	140499168.9	149722837.9	9926507.381	127679680.4	44589215.02	91818007.51	108821254.6	88759583.81	147243082.2	1	1	0.602809874	-0.219819643	0.022292018	1.651850615
Q99M64	Phosphatidylinositol 4-kinase type 2-alpha OS=Rattus norvegicus OX=10116 GN=Pi4k2a PE=1 SV=1	36	14	96	14	1	478	54.3	8.07	204.68	14	0	16603907.24	18253993.73	20147873.73	18028811.11	17551392.02	19710909.69	9244940.606	6087641.291	9597605.668	12453875.09	17322531.48	11772143.68	11079789.64	18382814.59	1	1	0.60272542	-0.219880492	0.00122999	2.910098419
A0A0G2JW90	Pyruvate dehydrogenase E1 component subunit alpha OS=Rattus norvegicus OX=10116 GN=Pdha1 PE=1 SV=1	32	12	172	12	1	390	43.2	8.19	363.14	12	0	88899229.04	111713242.2	192084435.3	172910775.7	110386869.6	151823275.3	82446664.06	36754255.44	74239158.25	147435701.8	83150080.13	74759880.23	83130956.66	137969637.8	1	1	0.602530803	-0.220020746	0.032383357	1.489678132
Q6IRH6	Phosphate carrier protein, mitochondrial OS=Rattus norvegicus OX=10116 GN=Slc25a3 PE=1 SV=1	30	12	328	12	1	357	39.6	9.29	802.77	12	0	283987566.1	337310155.4	647426419.5	536944018	397614574.8	405223928.8	141390630.1	179740046.3	151515855.2	382954357.3	461877611.1	254138525.7	261936170.9	434751110.4	1	1	0.602496842	-0.220045225	0.048874382	1.310918721
P48303	Sphingosine 1-phosphate receptor 1 OS=Rattus norvegicus OX=10116 GN=S1pr1 PE=1 SV=1	2	1	6	1	1	383	42.7	9.48	8.81	1	0	933529.2258	1076262.375	1140097.998	938359.855	1487398.114	1012229.521	429408.8369	339918.3868	880687.9215	494530.6896	843621.4	979696.5596	661310.6324	1097979.515	1	1	0.602297787	-0.220188733	0.010568442	1.975989032
G3V796	Acetyl-Coenzyme A dehydrogenase, medium chain OS=Rattus norvegicus OX=10116 GN=Acadm PE=1 SV=1	27	10	105	10	1	421	46.5	8.41	265.75	10	0	32459838.4	54447596.25	68672854.73	78480621.56	55817541.71	55002257.18	26378061.06	64934667.13	14656608.2	49887928.8	28424008.96	22627702.76	34484829.49	57480118.3	1	1	0.599943607	-0.22188957	0.044609642	1.350571262
Q32KJ5	N-acetylglucosamine-6-sulfatase OS=Rattus norvegicus OX=10116 GN=Gns PE=1 SV=1	16	8	47	8	1	544	60.9	7.72	91.49	8	0	7757010.774	9180219.938	11557787.03	13201775.7	12058130.07	11952008.37	6012617.523	3620689.807	5436121.549	13464183.62	6407264.84	4396785.252	6556277.098	10951155.31	1	1	0.598683601	-0.222802638	0.025026056	1.601607588
P06686	Sodium/potassium-transporting ATPase subunit alpha-2 OS=Rattus norvegicus OX=10116 GN=Atp1a2 PE=1 SV=1	27	23	398	8	1	1020	112.1	5.55	1111.7	23	0	6537911.213	5420722.453	11448460.55	8496601.285	7810001.971	7913297.361	5540831.002	480833.7118	7919800.819	5638214.08	3664939.726	5233188.248	4746301.265	7937832.472	1	1	0.597934169	-0.223346628	0.035875347	1.44520389
Q6NX65	Programmed cell death protein 10 OS=Rattus norvegicus OX=10116 GN=Pdcd10 PE=2 SV=1	21	4	31	4	1	210	24.3	7.39	73.69	4	0	12639754.45	17072057.13	12454506.54	15337110.6	13551655.34	10310119.76	16939738.71	2804912.851	4327098.793	8809510.151	7303374.381	8412853.095	8099581.33	13560867.3	1	1	0.597276055	-0.223824896	0.034598792	1.460939064
A0A0G2JUB0	Protein FAM3C OS=Rattus norvegicus OX=10116 GN=Fam3c PE=1 SV=1	19	4	12	4	1	227	24.7	8.03	24.9	4	0	6002724.611	7823679.625	10506492.72	5812823.947	7823940.392	8160746.781	6215823.427	1323982.484	3357347.591	4932050.735	4669992.291	7019410.66	4586434.532	7688401.346	1	1	0.596539427	-0.224360847	0.01710404	1.766901296
Q924S1	1-acyl-sn-glycerol-3-phosphate acyltransferase delta OS=Rattus norvegicus OX=10116 GN=Agpat4 PE=2 SV=1	24	9	43	9	1	378	43.8	8.41	81.21	9	0	10083000.78	10229194.22	9039030.442	5698277.917	9181225.486	8500233.466	3667865.457	47453.50331	4212852.578	5416192.771	8974384.937	9136260.345	5242501.599	8788493.719	1	1	0.596518785	-0.224375875	0.046621916	1.331409882
Q9QZK5	Serine protease HTRA1 OS=Rattus norvegicus OX=10116 GN=Htra1 PE=2 SV=1	7	3	19	3	1	480	51.3	7.65	48.68	3	0	3891148.483	4143608.797	5068081.501	4089935.431	3911990.774	5544557.011	2595532.374	379847.0077	2814894.568	2041391.134	4048910.281	4006129.621	2647784.164	4441553.666	1	1	0.596139181	-0.224652333	0.01679522	1.774814303
A0A0G2JYA2	ADP-ribosylation factor interacting protein 1, isoform CRA_b OS=Rattus norvegicus OX=10116 GN=Arfip1 PE=1 SV=1	15	4	25	4	1	373	41.4	6.67	66.63	4	0	8906735.6	6622079.125	4800647.09	5073315.019	7054973.433	5087561.668	5450540.556	216473.1446	4677033.291	3553188.801	3730319.849	4725291.011	3725474.442	6257551.989	1	1	0.595356531	-0.225222878	0.02955937	1.529304826
Q498R3	DnaJ homolog subfamily C member 10 OS=Rattus norvegicus OX=10116 GN=Dnajc10 PE=2 SV=2	15	9	80	9	1	793	90.7	7.14	135.23	9	0	14600342.49	8531141.047	21255115.02	16870589.24	14434653.46	13982139.68	7865193.197	6860586.319	6978530.297	7774161.253	11102312.82	12715123.7	8882651.264	14945663.49	1	1	0.594329671	-0.225972588	0.011460333	1.940802763
P32551	Cytochrome b-c1 complex subunit 2, mitochondrial OS=Rattus norvegicus OX=10116 GN=Uqcrc2 PE=1 SV=2	42	15	280	15	1	452	48.4	9.14	739.27	15	0	114429311.3	134400526.2	189097236.7	177322777.2	156602939.6	106656606.3	77399139.32	108162317.6	65699940.33	92250154.31	98856951.45	79345497.51	86952333.41	146418232.9	1	1	0.593862743	-0.22631392	0.002795169	2.553591929
Q9JJW3	Up-regulated during skeletal muscle growth protein 5 OS=Rattus norvegicus OX=10116 GN=Atp5md PE=1 SV=1	17	1	20	1	1	58	6.4	9.83	33.76	1	0	6130860.69	6448088.5	7416275.642	6836111.962	4879347.854	4766289.734	2984152.144	6765390.346	1430826.33	2170968.885	4994053.301	3308302.076	3608948.847	6079495.73	1	1	0.593626348	-0.226486831	0.021738594	1.662768548
G3V9N0	Polyadenylate-binding protein OS=Rattus norvegicus OX=10116 GN=Pabpc4 PE=1 SV=2	18	9	46	4	1	644	70.8	9.26	122.16	9	0	15394556.42	21348672.25	13523682.28	10027306.94	25625668.52	17415666.85	8311662.275	7434849.893	8421377.784	6812962.648	9908027.505	20309231.51	10199685.27	17222592.21	1	1	0.592227067	-0.227511748	0.045774926	1.339372349
Q5PPI8	Regulator of MON1-CCZ1 OS=Rattus norvegicus OX=10116 GN=Rmc1 PE=1 SV=1	12	6	25	6	1	657	74.8	7.94	35.52	6	0	4221564.333	4248654.594	3090056.981	3316473.605	4177924.142	5480824.307	1100904.753	1472613.226	2999501.594	2986205.526	2798356.743	3170360.5	2421323.724	4089249.66	1	1	0.592119319	-0.227590769	0.007779553	2.109045356
F7F3Z1	Lectin, mannose-binding 2-like OS=Rattus norvegicus OX=10116 GN=Lman2l PE=1 SV=2	3	1	8	1	1	349	40.1	9.26	14.13	1	0	1076178.198	1322710	1829592.692	1492577.371	1825130.444	1452343.621	434628.2214	1253710.173	728537.8013	793283.1272	1120130.467	996940.6997	887871.7482	1499755.388	1	1	0.592011041	-0.227670194	0.004856191	2.31370424
B0BMT9	Sqrdl protein OS=Rattus norvegicus OX=10116 GN=Sqor PE=1 SV=1	43	21	375	21	1	450	50.2	9.07	1007.15	21	0	133596637.3	173251395.5	249500549.6	204400410.8	175357080.1	137750706.2	139471988	12870373.7	66607597.97	148124499	158310321.9	110213548.7	105933054.9	178976129.9	1	1	0.591883705	-0.227763616	0.03063267	1.513815148
B2RZD1	Protein transport protein Sec61 subunit beta OS=Rattus norvegicus OX=10116 GN=Sec61b PE=1 SV=1	22	2	20	2	1	96	10	11.56	38.85	2	0	41822650.74	41422601.5	67396887.64	38688573.04	39969648.48	48006469.3	13105111.09	48074058.48	14140586.31	17436150.74	31981377.14	38953284.46	27281761.37	46217805.12	1	1	0.590286824	-0.228936911	0.028738454	1.541536599
D3ZFK5	RCG42279 OS=Rattus norvegicus OX=10116 GN=Spcs1 PE=1 SV=3	8	2	25	2	1	162	18.1	9.6	37.08	2	0	18879777.83	17686275.75	22476477.65	22752875.36	21465437.62	18324720.04	7854331.382	13447137.75	9195361.37	10924082.57	17595057.95	12626600.79	11940428.64	20264260.71	1	1	0.589235838	-0.229710847	0.000578618	3.23760806
D3ZV63	Odr-4 GPCR localization factor homolog OS=Rattus norvegicus OX=10116 GN=Odr4 PE=1 SV=1	9	3	6	3	1	447	50	6.18	12.87	3	0	3372531.579	4132756.75	5998435.958	5694409.21	5358148.922	6695424.159	1441161.04	NA	1791883.778	5420041.126	4021039.414	2646791.142	3064183.3	5208617.763	0.833333333	1	0.588291067	-0.230407746	0.035620653	1.448298123
A2RRT9	Cytochrome P450 4V2 OS=Rattus norvegicus OX=10116 GN=Cyp4v2 PE=2 SV=1	18	9	50	9	1	525	60.5	8.35	99.74	9	0	17003609.19	16510527.66	16736379.43	13397546.63	17409129.37	15112408.35	9709472.57	17401276.18	3268976.667	3161168.203	10809743.78	12130467.2	9413517.433	16028266.77	1	1	0.58730726	-0.231134631	0.017202041	1.764420022
Q5BK77	Retinoic acid receptor responder (Tazarotene induced) 2 OS=Rattus norvegicus OX=10116 GN=Rarres2 PE=1 SV=1	15	2	31	2	1	163	18.5	8.72	83.64	2	0	2284226.252	3062849.625	2146066.313	3010492.173	3243985.531	1694066.925	1971700.601	691200.7123	856197.8601	805198.6167	2225951.819	2516475.361	1511120.828	2573614.47	1	1	0.587158973	-0.231244298	0.02940908	1.531518561
P70470	Acyl-protein thioesterase 1 OS=Rattus norvegicus OX=10116 GN=Lypla1 PE=1 SV=1	9	2	4	2	1	230	24.7	6.51	8.74	2	0	2436335.888	3376953.25	2772696.8	NA	1447586.622	2456294.347	1452936.906	2107157.173	NA	1234752.468	1321008.683	1209019.606	1464974.967	2497973.381	0.833333333	0.833333333	0.586465404	-0.231757602	0.019389536	1.712432584
A0A0G2K6B2	RCG60109 OS=Rattus norvegicus OX=10116 GN=Triobp PE=1 SV=1	33	16	60	15	1	580	66.9	6.21	143.5	16	0	19215163.21	21025012.8	17143421.51	14721303.35	20429297.99	24056457.5	17259170.11	9427932.345	6837184.058	11717334.69	11670632.71	11222804.63	11355843.09	19431776.06	1	1	0.584395531	-0.233293114	0.0018677	2.728692881
A0A0H2UHZ9	GTPase IMAP family member 8 OS=Rattus norvegicus OX=10116 GN=Gimap8 PE=4 SV=1	20	11	45	11	1	716	80	8.07	108.35	11	0	10453727.75	8406127.344	6218454.624	7465819.679	6768045.746	7136295.091	6899980.495	1473921.626	3608637.466	2764035.425	3854276.365	8530151.204	4521833.763	7741411.707	1	1	0.584109712	-0.233505573	0.027639088	1.558476291
F1LSG0	Neural Wiskott-Aldrich syndrome protein OS=Rattus norvegicus OX=10116 GN=Wasl PE=1 SV=2	5	3	4	3	1	501	54.3	7.93	3.87	3	0	1636855.321	1835920.563	2115445.581	2467676.29	811380.7387	1945998.434	1612539.911	1170812.315	479635.0518	1719191.151	566148.3467	759666.5324	1051332.218	1802212.821	1	1	0.583356308	-0.234066102	0.038830639	1.410825463
F1M820	Sorbin and SH3 domain-containing protein 1 OS=Rattus norvegicus OX=10116 GN=Sorbs1 PE=1 SV=1	2	2	3	2	1	1290	143.3	8.22	9.16	2	0	296085.9818	330181.1875	255522.4234	367237.3371	224722.8197	293443.4129	145869.8778	191315.5556	NA	NA	NA	177969.1581	171718.1972	294532.1937	0.5	1	0.583020128	-0.234316452	0.006074634	2.216479883
P05065	Fructose-bisphosphate aldolase A OS=Rattus norvegicus OX=10116 GN=Aldoa PE=1 SV=2	54	18	291	16	1	364	39.3	8.09	666.52	18	2	304937937.1	259532760.9	310894802.1	377248657	227779405	297235515.5	219580134.5	36170573.84	224833855.4	203333548.2	188559493.2	163467179.8	172657464.2	296271512.9	1	1	0.582767686	-0.234504538	0.005860531	2.232063032
D4A7N1	MICOS complex subunit Mic25 OS=Rattus norvegicus OX=10116 GN=Chchd6 PE=1 SV=1	24	5	28	5	1	261	29.2	7.94	81.51	5	0	2829075.009	3592588.906	6585494.781	4560457.561	3743132.052	2642791.5	3621410.424	3115972.813	1336857.544	1744414.132	2277981.146	1859507.454	2326023.919	3992256.635	1	1	0.582633866	-0.234604275	0.036378034	1.439160775
Q64194	Lysosomal acid lipase/cholesteryl ester hydrolase OS=Rattus norvegicus OX=10116 GN=Lipa PE=2 SV=1	21	6	35	6	1	397	45.2	7.05	81.75	6	0	8512454.529	15898872.28	13335694.4	12146024.41	16501091.96	19506281.35	3426751.794	13013188.11	2234738.167	13295150.73	12889042.99	5111894.15	8328460.99	14316736.49	1	1	0.581729013	-0.235279276	0.048175214	1.317176347
F8WG88	Follistatin-related protein 1 OS=Rattus norvegicus OX=10116 GN=Fstl1 PE=4 SV=3	4	2	12	2	1	535	60.6	5.3	31.13	2	0	1614675.343	2362396.625	1754482.159	2523285.425	1243275.012	1883739.629	1614357.503	221153.2482	811511.1003	1001044.208	1140351.096	1831182.697	1103266.642	1896975.699	1	1	0.581592396	-0.23538128	0.02663495	1.574548114
M0RCX0	Pterin-4 alpha-carbinolamine dehydratase 2 OS=Rattus norvegicus OX=10116 GN=Pcbd2 PE=1 SV=1	8	1	5	1	1	127	14.1	9.2	10.23	1	0	1260122.006	1843571.625	2646004.616	2011868.913	NA	1287292.477	847122.5772	1535684.233	966582.4671	956353.0822	NA	913741.8972	1043896.851	1809771.927	0.833333333	0.833333333	0.576811274	-0.23896626	0.027719888	1.557208529
D3ZF13	Acyl carrier protein OS=Rattus norvegicus OX=10116 GN=Ndufab1 PE=1 SV=1	21	4	61	4	1	156	17.5	5.07	135.19	4	0	13669170.98	20113321.88	33827024.72	24628614.83	20637512.13	18621666.68	10980170.32	14874008.91	2359349.159	21464911.98	18634130.41	7506681.231	12636542	21916218.54	1	1	0.576584048	-0.239137377	0.043939732	1.357142596
A0A0G2JSV6	Globin c2 OS=Rattus norvegicus OX=10116 GN=Hba-a2 PE=1 SV=1	90	11	766	9	1	142	15.3	8.31	2526.4	11	2	11528905502	6817361986	10231012457	15715069514	5880069097	8210268558	9954869189	2774985939	6385250479	5471507922	2659532241	6374404153	5603424987	9730447852	1	1	0.575865065	-0.239679267	0.048924151	1.310476702
B2RZ77	Dermatopontin OS=Rattus norvegicus OX=10116 GN=Dpt PE=1 SV=1	18	4	15	4	1	202	24.2	4.86	32.18	4	0	2675290.157	5001419.75	3983022.778	3334642.127	3870572.919	3575566.947	578158.152	2264880.035	1025417.668	2943779.088	2615661.433	3448620.611	2146086.164	3740085.78	1	1	0.573806669	-0.241234409	0.016757319	1.775795463
P05982	NAD(P)H dehydrogenase [quinone] 1 OS=Rattus norvegicus OX=10116 GN=Nqo1 PE=1 SV=4	24	5	63	5	1	274	30.9	8.43	127.75	5	0	10920402.71	14943453.22	16267939.95	21504308.28	13548974.97	13491884.99	7500383.703	9152879.868	10315415.78	10254499.85	7813233.223	6947906.316	8664053.124	15112827.35	1	1	0.573291345	-0.241624615	0.002256629	2.646539835
P52555	Endoplasmic reticulum resident protein 29 OS=Rattus norvegicus OX=10116 GN=Erp29 PE=1 SV=2	46	10	271	10	1	260	28.6	6.62	706.04	10	0	76588009.83	55049468.7	85191150.17	81880892.3	70618457.07	47621408.78	50905662.5	61010074.4	20756313.9	17066596.53	36165317.09	52644397.51	39758060.32	69491564.48	1	1	0.572127864	-0.242506901	0.011352594	1.944904893
A0A0G2JUF5	Pulmonary surfactant-associated protein D OS=Rattus norvegicus OX=10116 GN=Sftpd PE=1 SV=1	23	8	179	8	1	414	42	8.43	498.83	8	0	55681561.73	75273620.69	70100734.77	80233870.51	87738052.35	98276871.01	36286396.03	818075.5872	44678918.82	102747441	48483520.87	34299114.17	44552244.41	77884118.51	1	1	0.572032466	-0.242579322	0.04794679	1.319240463
A0A0G2JWA5	Sarcolemmal membrane-associated protein OS=Rattus norvegicus OX=10116 GN=Slmap PE=1 SV=1	18	13	67	13	1	808	92.9	5.26	163.79	13	0	21737845.88	18754625.22	18881083.74	23451703.96	16834461.34	17525051.99	18016521.57	2849405.486	14173139.38	8104716.843	12738473.22	11148746.95	11171833.91	19530795.36	1	1	0.572011211	-0.242595459	0.005573892	2.25384145
B2GV57	Cysteinyl-tRNA synthetase 2, mitochondrial OS=Rattus norvegicus OX=10116 GN=Cars2 PE=1 SV=1	19	8	31	8	1	550	60.9	8.29	65.8	8	0	9900624.857	12370473.98	15601269.37	13391162.91	12296075.06	9874221.416	7178478.285	1767970.665	7082365.073	9627126.552	9706137.728	6632031.528	6999018.305	12238971.27	1	1	0.571863284	-0.242707786	0.005298099	2.275879931
P51646	ADP-ribosylation factor-like protein 5A OS=Rattus norvegicus OX=10116 GN=Arl5a PE=2 SV=1	11	2	11	2	1	179	20.7	6.79	19.12	2	0	2041133.714	1876214.125	2188748.265	1898966.751	794867.2093	1709901.953	588666.4713	801496.8841	1385985.874	1199195.795	956936.316	1053293.309	997595.775	1751638.669	1	1	0.569521439	-0.244489923	0.008963794	2.047508133
D3ZFY8	Ubiquitin-conjugating enzyme E2 V1 OS=Rattus norvegicus OX=10116 GN=LOC100912618 PE=1 SV=1	18	3	39	3	1	147	16.3	7.96	28.63	3	0	8563225.136	8691246.5	7853213.775	11168186.87	4853704.638	8219192.802	6368664.44	4350296.482	5342474.641	3149844.713	5225975.006	3659650.779	4682817.677	8224794.954	1	1	0.569353729	-0.244617831	0.004147597	2.382203448
F1LM47	Succinate--CoA ligase [ADP-forming] subunit beta, mitochondrial OS=Rattus norvegicus OX=10116 GN=Sucla2 PE=1 SV=1	28	10	123	10	1	465	50.3	7.69	333.79	10	0	46259889.47	64935618.97	68254939.34	85964044.53	76256811.13	47185514.13	36389020.5	45557219.64	24092953.55	50978616.06	30964948.84	32915173.16	36816321.96	64809469.59	1	1	0.568070101	-0.245598068	0.00422942	2.373719185
F1LPA4	Serine/threonine-protein kinase N2 OS=Rattus norvegicus OX=10116 GN=Pkn2 PE=1 SV=1	15	11	35	10	1	983	111.7	6.28	65.64	11	0	5623616.638	4938632.391	3503629.659	4890292.297	5480113.698	3664147.895	6002368.537	851992.4125	2959448.77	1695398.302	1423675.778	3010075.489	2657159.881	4683405.43	1	1	0.567356365	-0.246144069	0.036549027	1.43712418
A0A0G2K2D6	Tubulin polymerization-promoting protein OS=Rattus norvegicus OX=10116 GN=Tppp PE=1 SV=1	6	1	2	1	1	235	25.6	9.55	4.43	1	0	641347.4206	513090.875	684860.8045	683366.6344	609020.9497	417465.1968	557665.0833	158043.7617	NA	NA	NA	290114.7863	335274.5438	591525.3135	0.5	1	0.566796612	-0.246572754	0.037060886	1.431084202
P54001	Prolyl 4-hydroxylase subunit alpha-1 OS=Rattus norvegicus OX=10116 GN=P4ha1 PE=2 SV=2	31	14	132	14	1	534	60.9	5.9	320.67	14	0	56717389.04	53106729.12	67971519.43	61365800.21	70683357.06	50510809.21	46505669.64	21522228.88	22733477.53	21980208.59	44444538.12	46749484.04	33989267.8	60059267.34	1	1	0.565928778	-0.247238221	0.001975136	2.704402995
D3ZAA9	MAGUK p55 subfamily member 2 OS=Rattus norvegicus OX=10116 GN=Mpp2 PE=1 SV=2	17	8	27	7	1	552	61.5	6.44	65.98	8	0	12147943.37	10251955.44	6830821.871	7352490.672	11218512.08	11056456.69	7355996.964	2428871.805	5536508.599	1494613.119	4317858.659	12174297.41	5551357.759	9809696.687	1	1	0.565905138	-0.247256363	0.041017922	1.387026345
D4A3V2	NADH dehydrogenase [ubiquinone] 1 alpha subcomplex subunit 6 OS=Rattus norvegicus OX=10116 GN=Ndufa6 PE=1 SV=1	27	3	41	3	1	130	15.2	10.15	94.79	3	0	7705774.736	7806493	13319399.84	13804846.77	8021396.777	6475443.41	5027342.421	6336006.796	3704648.392	4732814.073	5747582.221	6733978.965	5380395.478	9522225.756	1	1	0.565035488	-0.247924275	0.013098094	1.882791897
Q6AYK6	Calcyclin-binding protein OS=Rattus norvegicus OX=10116 GN=Cacybp PE=1 SV=1	13	3	9	3	1	229	26.5	7.87	19.38	3	0	1360641.433	2304539.5	2558584.445	2618621.726	3166181.186	2244075.503	1944711.924	1204578.461	1435790.131	1056237.766	1238151.438	1170221.88	1341615.267	2375440.632	1	1	0.564785854	-0.248116189	0.003798403	2.42039896
P60905	DnaJ homolog subfamily C member 5 OS=Rattus norvegicus OX=10116 GN=Dnajc5 PE=1 SV=1	16	4	79	4	1	198	22.1	5.07	229.38	4	0	14229299.75	26090438.41	18532446.44	19390114.29	28558349	18050091.2	5896934.056	1734183.219	8393112.91	13842389.78	19259526.85	21352999.89	11746524.45	20808456.52	1	1	0.564507245	-0.24833048	0.040418677	1.393417906
G3V8S0	Serine peptidase inhibitor, Kunitz type, 2 OS=Rattus norvegicus OX=10116 GN=Spint2 PE=1 SV=1	22	4	27	4	1	250	27.5	8.13	66.29	4	0	6251296.859	5046579.844	5606615.486	5442076.294	6908425.877	5539754.539	1860791.066	448938.0752	1774854.663	4736960.505	6016469.112	4797244.048	3272542.911	5799124.816	1	1	0.564316688	-0.248477107	0.022649549	1.644940441
B2GV06	Succinyl-CoA:3-ketoacid coenzyme A transferase 1, mitochondrial OS=Rattus norvegicus OX=10116 GN=Oxct1 PE=1 SV=1	35	13	144	13	1	520	56.2	8.47	351.51	13	0	42706271.83	58993552.55	53913873.45	73325935.2	59305829.5	60505234.03	34965201.51	3639873.467	38909398.4	50674223.55	36372562.93	31987907.04	32758194.48	58125116.09	1	1	0.563580715	-0.249043876	0.007358402	2.13321649
P22062	Protein-L-isoaspartate(D-aspartate) O-methyltransferase OS=Rattus norvegicus OX=10116 GN=Pcmt1 PE=1 SV=2	31	5	23	5	1	227	24.6	7.68	56.24	5	0	6156830.094	6584127.563	6800613.673	5385559.765	5735671.324	6309998.892	4385742.941	2909380.911	3507583.457	3135650.236	3064040.693	3796247.801	3466441.007	6162133.552	1	1	0.562539091	-0.249847293	6.05E-06	5.218244625
Q6AYQ4	Transmembrane protein 109 OS=Rattus norvegicus OX=10116 GN=Tmem109 PE=2 SV=1	9	3	54	3	1	243	26.2	9.77	158.87	3	0	37661516.28	46539077.5	53027463.93	48907421.89	42503063.29	34134634.49	26650616.63	4105647.623	17149946.95	24761533.92	28002495.53	46974837.4	24607513.01	43795529.56	1	1	0.561872713	-0.250362059	0.01379876	1.860159939
B0K026	LETM1 domain-containing 1 OS=Rattus norvegicus OX=10116 GN=Letmd1 PE=1 SV=1	6	2	11	2	1	371	43.1	10.67	30.74	2	0	1899229.545	2144655.5	4356149.301	2844011.243	2039946.682	2100103.491	601474.6137	2261394.07	1098474.333	1401713.395	2415294.581	858116.259	1439411.209	2564015.96	1	1	0.561389332	-0.250735844	0.044388348	1.352731018
D3ZHR2	ATP-binding cassette sub-family D member 1 OS=Rattus norvegicus OX=10116 GN=Abcd1 PE=1 SV=1	9	5	30	5	1	737	81.9	8.53	85.03	5	0	6874089.432	8155754.5	8029563.8	6733331.26	8300081.869	8684515.384	1326357.888	7261021.056	837915.4335	4787886.45	5777145.777	6262210.781	4375422.898	7796222.708	1	1	0.561223436	-0.250864202	0.013372458	1.873788757
A0A0G2K8T0	Acid ceramidase OS=Rattus norvegicus OX=10116 GN=Asah1 PE=1 SV=1	31	12	141	12	1	428	48.3	9.17	309.92	12	0	69016422.04	90429712.32	88504536.1	95182698.89	99939727.5	104470999.9	30438482.56	31961710.2	47128079.79	67817205.69	75554169.04	53511014.76	51068443.67	91257349.45	1	1	0.559609105	-0.252115228	0.001259101	2.899939431
A0A0G2JXG3	Cell cycle control protein OS=Rattus norvegicus OX=10116 GN=Tmem30a PE=1 SV=1	19	7	105	7	1	364	41.1	7.97	287.95	7	0	29538348.49	62874884.5	35276912.68	57148928.5	35438745.08	39541172.91	15652998.94	17952172.86	28945313.48	27518577.45	28022216.01	27285546.62	24229470.89	43303165.36	1	1	0.559531173	-0.252175713	0.009699574	2.013247339
P29066	Beta-arrestin-1 OS=Rattus norvegicus OX=10116 GN=Arrb1 PE=1 SV=1	16	8	53	8	1	418	47	6.28	116.64	8	0	26488236.84	23287655.56	14928999.05	19342821.97	21050257.39	19045510.65	15482078.04	1743220.939	10809102.9	10324834.54	13371372.38	17708598.8	11573201.27	20690580.24	1	1	0.559346385	-0.252319164	0.008421522	2.074609412
Q3B7T6	CTD nuclear envelope phosphatase 1 OS=Rattus norvegicus OX=10116 GN=Ctdnep1 PE=2 SV=2	5	1	7	1	1	244	28.4	9.76	14.54	1	0	480364.6906	410385	607675.6372	360018.2075	441243.4422	614922.9338	273077.0122	175753.4316	311950.9467	325818.7351	NA	NA	271650.0314	485768.3186	0.666666667	1	0.559217267	-0.252419427	0.007222206	2.141330128
G3V7U6	Calpain-5 OS=Rattus norvegicus OX=10116 GN=Capn5 PE=1 SV=2	24	15	94	15	1	750	84.5	8.27	184.07	15	0	20105579.58	25630045.3	29283241.68	24053311.65	20848142.49	30041424.07	12966364.07	5045003.412	18304944.53	12644760.14	17931631.21	16871937.12	13960773.42	24993624.13	1	1	0.558573392	-0.252919756	0.001965935	2.706430845
D4A4P3	NADH:ubiquinone oxidoreductase subunit B3 OS=Rattus norvegicus OX=10116 GN=Ndufb3 PE=1 SV=1	11	1	8	1	1	99	11.3	9.04	17.82	1	0	2013364.319	2048583.5	3939807.777	3190662.08	2062926.265	1770405.833	673119.8931	2210217.531	692579.2356	985195.0597	1715377.37	2112360.869	1398141.66	2504291.629	1	1	0.55829826	-0.253133726	0.034997438	1.455963747
P62142	Serine/threonine-protein phosphatase PP1-beta catalytic subunit OS=Rattus norvegicus OX=10116 GN=Ppp1cb PE=1 SV=3	38	12	158	2	1	327	37.2	6.19	386.39	12	0	9790233.959	11856720.25	16735927.71	11934398.82	8336539.184	9621202.62	4956325.241	2799107.742	6744536.733	7736970.335	8046131.619	7807231.351	6348383.837	11379170.42	1	1	0.557895136	-0.253447425	0.006787138	2.16831332
Q68FW7	Threonine--tRNA ligase, mitochondrial OS=Rattus norvegicus OX=10116 GN=Tars2 PE=2 SV=1	3	3	11	1	1	723	81.6	7.87	10.7	3	0	NA	773800.3125	NA	1209592.202	NA	801594.4723	545000.6337	NA	NA	578108.6088	NA	428950.1902	517353.1442	928328.9956	0.5	0.5	0.557295039	-0.253914823	0.049922636	1.301702491
A0A0G2K9W7	Low-density lipoprotein receptor-related protein 2 OS=Rattus norvegicus OX=10116 GN=Lrp2 PE=1 SV=1	12	44	266	44	1	4660	519	5.24	601.8	44	0	46339341.44	42324543.32	43491028.95	40212716.87	46538144.21	42852500.7	13495977.42	1305039.777	15989015.36	27471638.63	55815903.26	31778164.35	24309289.8	43626379.25	1	1	0.557215387	-0.253976899	0.031917298	1.495973882
Q8R431	Monoglyceride lipase OS=Rattus norvegicus OX=10116 GN=Mgll PE=1 SV=1	29	7	50	7	1	303	33.5	7.37	116.52	7	0	14910557.43	13670952.55	12969195.74	11628783.12	13241187.49	9864454.76	7221300.918	2478309.402	6720956.316	8021129.916	6993202.836	11053801.29	7081450.113	12714188.51	1	1	0.556972244	-0.254166447	0.001765155	2.753217153
Q5XIE6	3-hydroxyisobutyryl-CoA hydrolase, mitochondrial OS=Rattus norvegicus OX=10116 GN=Hibch PE=1 SV=2	25	8	36	8	1	385	43	8.46	98.9	8	0	11434553.55	14830621.73	18152852.65	18642303.97	18421787.7	13568202.21	9878502.058	9511097.678	8055145.15	9422201.311	7568907.487	8476348.762	8818700.408	15841720.3	1	1	0.556675679	-0.254397752	0.000278005	3.555947393
P13264	Glutaminase kidney isoform, mitochondrial OS=Rattus norvegicus OX=10116 GN=Gls PE=1 SV=2	22	9	51	3	1	674	74	7.87	128.99	9	6	6470533.111	8419875.844	10873781.95	10344899.67	7179010.38	6386789.544	5754210.884	713459.5789	1768771.225	8967066.814	5802159.933	4639586.018	4607542.409	8279148.416	1	1	0.556523712	-0.254516327	0.030767575	1.511906732
Q498S7	N-myc (And STAT) interactor OS=Rattus norvegicus OX=10116 GN=Nmi PE=2 SV=1	24	5	25	5	1	280	31.7	5.77	63.25	5	0	9057939.525	10748571.78	8441297.994	6532351.748	6809994.191	6953291.472	4983949.466	1204527.536	5058591.292	5336718.073	6003473.795	4427073.553	4502388.953	8090574.452	1	1	0.556498056	-0.254536348	0.003951604	2.403226584
A7XYB9	NADH-ubiquinone oxidoreductase chain 4 OS=Rattus norvegicus OX=10116 GN=Nd4 PE=3 SV=1	6	2	36	2	1	459	51.7	9.41	85.43	2	0	4100454.568	4458026.313	6874733.768	8599733.661	6179734.298	5277274.96	905865.3444	4174291.308	1319097.771	6667404.683	3778084.615	2898899.463	3290607.197	5914992.928	1	1	0.556316337	-0.254678186	0.037951946	1.420765951
P29419	ATP synthase subunit e, mitochondrial OS=Rattus norvegicus OX=10116 GN=Atp5me PE=1 SV=3	45	3	55	3	1	71	8.2	9.35	93.27	3	0	48158637.27	53169481	96756028.87	78307996.03	53961675.86	50196324.28	29641128.99	66308638.58	19731638.24	17633425.61	48239551.19	30137718.56	35282016.86	63425023.89	1	1	0.556279126	-0.254707236	0.029266483	1.533629464
D3ZGE6	Cortactin, isoform CRA_c OS=Rattus norvegicus OX=10116 GN=Cttn PE=1 SV=3	24	12	68	12	1	546	61	5.31	153.48	12	0	31734715.16	23403581.13	28223894.01	17430382.31	25982032.88	28632780.01	22051982.59	10373223.77	12717384.48	10513624.43	14524511.73	16232621.94	14402224.82	25901230.92	1	1	0.55604403	-0.254890818	0.001724504	2.763335794
Q499N5	Acyl-CoA synthetase family member 2, mitochondrial OS=Rattus norvegicus OX=10116 GN=Acsf2 PE=2 SV=1	39	21	245	21	1	615	67.8	8.12	626.52	21	0	88623199.13	119882742.8	161237534.4	182870539.1	128368447.2	126584994.4	57341218.92	93494529.79	57006820.4	84281704.59	87596577.73	68973488.32	74782389.96	134594576.2	1	1	0.55561221	-0.255228219	0.002547284	2.593922632
Q5U2P5	C2CD2-like OS=Rattus norvegicus OX=10116 GN=C2cd2l PE=1 SV=1	4	2	8	2	1	706	76	7.46	19.95	2	0	2235020.867	1868335.5	2695006.715	2805219.475	1431193.409	2340739.547	819589.5183	NA	372745.0103	NA	1892246.034	1867232.578	1237953.285	2229252.585	0.666666667	1	0.555322126	-0.255455022	0.038311822	1.416667194
G3V6G7	Polyribonucleotide nucleotidyltransferase 1 OS=Rattus norvegicus OX=10116 GN=Pnpt1 PE=1 SV=1	10	6	23	6	1	784	85.8	8.13	55.99	6	0	2959015.182	3820651.531	5137969.8	6332770.841	4355852.653	3923805.445	1488308.011	995070.1362	2677012.818	4810766.718	2416605.532	2322892.397	2451775.935	4421677.575	1	1	0.554489986	-0.256106293	0.021135296	1.674991665
B1H257	BLOC-1-related complex subunit 5 OS=Rattus norvegicus OX=10116 GN=Borcs5 PE=1 SV=1	13	2	11	2	1	195	22.2	6.55	23.79	2	0	2975924.394	2738833.5	4869832.14	1188984.779	2845270.594	3430217.109	2786509.655	2010455.617	1038728.21	939109.6093	1516112.28	1707594.959	1666418.388	3008177.086	1	1	0.553962862	-0.25651935	0.037291506	1.428390078
D3ZIA7	Anterior gradient 2 (Xenopus laevis) (Predicted), isoform CRA_a OS=Rattus norvegicus OX=10116 GN=Agr2 PE=4 SV=1	22	3	22	3	1	175	19.9	9.01	49.55	3	0	8312810.477	7853209	10439339.24	10533493.14	6491927.546	7765788.184	6519936.617	342430.3035	6728376.084	4311347.104	4462539.653	6003001.578	4727938.557	8566094.599	1	1	0.5519363	-0.258111042	0.008362548	2.077661376
Q0R3W8	GIMAP1 OS=Rattus norvegicus OX=10116 PE=2 SV=1	39	10	51	10	1	300	33.3	8.75	104.26	10	0	26832887.33	30450391.31	31871082.52	22564853.95	27249075.04	31270526.38	14081328.47	13252605.97	13511283.81	10436352.07	16158276.73	26469230.53	15651512.93	28373136.09	1	1	0.551631405	-0.258351017	0.000838903	3.076288253
G3V8C4	Chloride intracellular channel protein OS=Rattus norvegicus OX=10116 GN=Clic4 PE=1 SV=1	69	14	235	14	1	253	28.7	5.59	649.53	14	0	185083610.5	222257120.3	166871253	211440763	166700207.3	199512737	149885002	29678945.05	103323575.6	93778344.95	96542227.27	161823933.1	105838671.3	191977615.2	1	1	0.551307355	-0.258606214	0.002442991	2.612078133
Q45QJ4	1-phosphatidylinositol 4,5-bisphosphate phosphodiesterase OS=Rattus norvegicus OX=10116 GN=Plcb3 PE=1 SV=1	14	15	93	15	1	1236	139.6	5.94	226.57	15	0	19150220.53	26292235.55	19162881.53	18814652.32	16308430.84	19191514.27	16820452.2	1638692.582	9644199.924	7291528.758	14999227.59	15118450.83	10918758.65	19819989.17	1	1	0.550896297	-0.258930147	0.008879845	2.051594615
Q566E5	KDEL motif-containing protein 2 OS=Rattus norvegicus OX=10116 GN=Kdelc2 PE=2 SV=1	21	8	44	8	1	508	58.7	8.31	84.97	8	0	11735320.27	14575454.16	12019634.8	11423700.26	11428059.78	9893307.461	8635431.389	3380624.298	5139659.276	8547438.725	5697082.659	7739093.321	6523221.611	11845912.79	1	1	0.55067277	-0.259106398	0.000547353	3.261732497
F1LN88	Aldehyde dehydrogenase, mitochondrial OS=Rattus norvegicus OX=10116 GN=Aldh2 PE=1 SV=2	52	25	596	1	1	519	56.5	7.33	1553.46	25	26	452135332.8	731624986.3	771249445.4	1064054281	794169849.8	566776239.8	357937448.3	635554059.5	190370612.4	545869280.8	349358438.9	331108356.2	401699699.4	730001689.2	1	1	0.550272287	-0.259422359	0.012569409	1.900685142
P18614	Integrin alpha-1 OS=Rattus norvegicus OX=10116 GN=Itga1 PE=1 SV=1	14	15	155	15	1	1180	130.7	5.96	361.36	15	0	58084327.65	70032947.06	32744544.07	38794416.96	58497288.97	61296455.32	29846576.5	13832393.39	33988768.48	19768768.3	30885679.72	47005454.39	29221273.46	53241663.34	1	1	0.548842234	-0.260552477	0.009563789	2.019370014
Q5U1Y1	Ras-related protein Rab-34 OS=Rattus norvegicus OX=10116 GN=Rab34 PE=2 SV=1	23	5	15	5	1	259	29.1	8.27	27.77	5	0	1481664.811	835118.1797	849625.8579	1389238.724	1525169.126	913398.9609	412182.1041	276420.8282	738794.9797	602586.3027	833941.3956	974180.9933	639684.4339	1165702.61	1	1	0.548754398	-0.260621986	0.012397854	1.906653482
F1LUA2	Translocating chain-associated membrane protein OS=Rattus norvegicus OX=10116 GN=Tram2 PE=3 SV=2	5	2	16	2	1	370	43.1	9.41	28.89	2	0	2257928.582	1782499.813	2784471.075	2229045.706	2325922.968	2460085.969	1062280.447	236334.3315	588678.9166	2367853.126	1308101.312	2029145.008	1265398.857	2306659.019	1	1	0.548585138	-0.260755962	0.016103516	1.793079291
G3V6P2	Dihydrolipoamide S-succinyltransferase (E2 component of 2-oxo-glutarate complex), isoform CRA_a OS=Rattus norvegicus OX=10116 GN=Dlst PE=1 SV=1	24	9	99	9	1	454	48.9	8.7	191.33	9	0	28221917.91	34846736.33	66545077.56	47636144.49	36966930.28	35849223.97	27924583.13	24477678.61	20715405.18	25539126.25	21037787.24	17295948.97	22831754.9	41677671.76	1	1	0.547817427	-0.261364156	0.008799801	2.055527149
D3ZBN4	Ergosterol biosynthesis 28 homolog OS=Rattus norvegicus OX=10116 GN=Erg28 PE=1 SV=1	19	3	23	3	1	140	15.8	9.91	47.06	3	0	14871262.84	17186817	32379827.82	18625101.97	18897215.74	17368184.9	4224296.972	15134262.6	7202703.723	8206300.46	17627984.23	12776683.66	10862038.61	19888068.38	1	1	0.546158551	-0.262681262	0.021451171	1.668548995
P53042	Serine/threonine-protein phosphatase 5 OS=Rattus norvegicus OX=10116 GN=Ppp5c PE=1 SV=1	7	3	10	3	1	499	56.9	6.2	20.14	3	0	1448059.183	1914824.219	2549557.619	2312310.978	2041559.344	2116048.661	1712624.268	313371.7213	926528.7581	1950048.975	727159.6624	1132572.784	1127051.028	2063726.667	1	1	0.546124177	-0.262708597	0.009635833	2.016110735
F1M9B2	Insulin-like growth factor binding protein 7, isoform CRA_b OS=Rattus norvegicus OX=10116 GN=Igfbp7 PE=1 SV=2	54	14	171	2	1	281	28.9	8.12	456.7	14	12	44693496.89	44706629.48	61036303.6	52711578.53	47179081.48	55712945.31	26821017.73	464312.787	13998974.99	43065359.36	41687637.91	41091858.47	27854860.21	51006672.55	1	1	0.546102281	-0.262726009	0.012857094	1.890857181
O55006	Protein RoBo-1 OS=Rattus norvegicus OX=10116 PE=1 SV=1	20	4	93	4	1	240	26.2	7.33	249.88	4	0	50015946.56	55006379	61674475.35	45696548.42	81555627.96	65282084.65	6794453.175	6962498.565	33277632.85	35244600.99	47110624.17	66755675.5	32690914.21	59871843.66	1	1	0.546014825	-0.262795565	0.031180967	1.50611042
Q62658	Peptidyl-prolyl cis-trans isomerase FKBP1A OS=Rattus norvegicus OX=10116 GN=Fkbp1a PE=1 SV=3	13	1	28	1	1	108	11.9	8.16	89.52	1	0	4141156.524	3808173.5	4474556.063	5816422.585	7564156.35	2876472.022	2606539.823	1285069.169	3176830.939	2249817.977	3581272.808	2759681.384	2609868.683	4780156.174	1	1	0.545979794	-0.26282343	0.016459431	1.783585182
Q9QYW3	MOB-like protein phocein OS=Rattus norvegicus OX=10116 GN=Mob4 PE=1 SV=1	12	2	15	2	1	225	26	5.78	37.6	2	0	430721.3327	974990.5	997502.2542	497649.4095	826630.8865	808573.8049	390053.6348	358691.0117	555437.3998	346861.3803	NA	NA	412760.8567	756011.3646	0.666666667	1	0.545971762	-0.262829819	0.027882495	1.554668367
Q9QX71	Napsin OS=Rattus norvegicus OX=10116 GN=Napsa PE=1 SV=1	18	5	68	5	1	420	45.6	8.84	160.12	5	0	35246601.21	29772815.44	15047320.93	24360210	42515280.07	28205179.37	16706580.86	1434260.469	10837942.82	26465927.92	24727479.43	15268296.77	15906748.05	29191234.5	1	1	0.544915223	-0.263671059	0.032830713	1.483719685
F1M953	Stress-70 protein, mitochondrial OS=Rattus norvegicus OX=10116 GN=Hspa9 PE=1 SV=1	44	29	345	29	1	679	73.7	6.16	932.92	29	0	118853518.7	148588617	287219441.5	269322746.6	151750920.7	149223367	114442115.4	122868974.1	35868852.29	191871411	75741190.62	69963415.87	101792659.9	187493101.9	1	1	0.54291416	-0.265268831	0.041595478	1.380953881
D4A465	Late endosomal/lysosomal adaptor, MAPK and MTOR activator 2 OS=Rattus norvegicus OX=10116 GN=Lamtor2 PE=1 SV=1	25	3	24	3	1	125	13.5	5.4	49.65	3	0	6073884.719	5675510.125	7703933.935	6952265.052	6765389.237	6242372.392	2976132.403	4260192.134	3794728.165	1971364.608	4913862.293	3473002.103	3564880.284	6568892.577	1	1	0.542691214	-0.265447209	0.000158669	3.799507915
A1L1J9	Lipase maturation factor 2 OS=Rattus norvegicus OX=10116 GN=Lmf2 PE=2 SV=1	14	7	59	7	1	702	80.2	10.02	131.01	7	0	26173291.57	31244068	47236301.23	27592842.05	34189951.92	38663595.33	14117704.99	13209158.85	15642593.57	21307357.34	24171899.57	22846085.01	18549133.22	34183341.68	1	1	0.542636627	-0.265490895	0.001907092	2.719628356
B0BNL7	RELT-like 1 OS=Rattus norvegicus OX=10116 GN=Rell1 PE=1 SV=1	6	1	14	1	1	272	29.5	8.1	42.9	1	0	1943381.64	2114857.813	1956643.37	1476300.487	1694316.406	1603252.91	1515597.414	819413.623	1937974.097	523210.4738	NA	81653.34528	975569.7906	1798125.438	0.833333333	1	0.54254824	-0.265561641	0.030960433	1.509192974
G3V6D3	ATP synthase subunit beta OS=Rattus norvegicus OX=10116 GN=Atp5f1b PE=1 SV=1	57	24	873	24	1	529	56.3	5.27	2391.9	24	0	553875968.3	825025622.3	1405854938	1241363025	843490890.2	589666449.9	565454026.4	527292047.8	185608289.1	854687054.3	413775862.4	414340295.6	493526262.6	909879482.3	1	1	0.542408387	-0.265673604	0.032167127	1.492587726
M0RDA4	EPH receptor B4 OS=Rattus norvegicus OX=10116 GN=Ephb4 PE=1 SV=2	12	9	46	6	1	987	108.7	6.95	103.63	9	3	6591512.682	8399676.688	5367587.08	5375041.711	8362422.798	7447529.016	5082938.639	655315.3485	3274519.182	3434296.659	4773564.667	5305359.96	3754332.409	6923961.662	1	1	0.542223165	-0.265821932	0.005723427	2.242343852
F1LRE1	Glutathione reductase OS=Rattus norvegicus OX=10116 GN=Gsr PE=1 SV=2	19	5	24	5	1	410	44.8	7.11	54.8	5	0	4024295.553	4258815.5	7227194.804	9444867.527	4030159.915	5235819.011	4231524.676	2754579.3	2375570.75	4153189.015	3143799.738	1893326.856	3091998.389	5703525.385	1	1	0.542120562	-0.26590412	0.02356008	1.627823239
P35286	Ras-related protein Rab-13 OS=Rattus norvegicus OX=10116 GN=Rab13 PE=1 SV=2	27	5	65	3	1	203	22.9	9.44	128.17	5	0	6078286.255	6389658.125	4515717.422	5826079.785	5680517.726	6696170.297	1960098.06	1543774.451	5060701.822	2806506.233	3937408.217	3758471.856	3177826.773	5864404.935	1	1	0.541883927	-0.266093731	0.001519933	2.818175556
A0A0G2JWI8	SEC14-like protein 3 OS=Rattus norvegicus OX=10116 GN=Sec14l4 PE=1 SV=1	52	19	408	15	1	400	46.1	5.78	883.92	19	4	267670354.8	346366446.7	279240045	246584192.9	412533682	219126734.8	213512478.8	25080958.81	162957185.3	137220001.5	253524446.6	166793902.6	159848162.3	295253576	1	1	0.541392807	-0.266487519	0.01058502	1.975308317
D3ZFQ8	Cytochrome c-1 OS=Rattus norvegicus OX=10116 GN=Cyc1 PE=1 SV=3	37	8	198	8	1	326	35.4	9.26	489.97	8	0	59196816.95	61018075.77	107846276.3	90377638.81	44759949.7	75141033.29	32816376.46	43099464.11	29334133.75	62216339.6	35524963.24	34121942.41	39518869.93	73056631.81	1	1	0.540934737	-0.266855129	0.010117841	1.99491215
P15943	Amyloid-like protein 2 OS=Rattus norvegicus OX=10116 GN=Aplp2 PE=1 SV=2	10	6	24	6	1	765	86.8	4.77	49.77	6	0	4139035.863	4309511.922	4745025.98	3751491.49	4509234.132	5182705.421	1865107.839	99740.04174	1859231.547	3435347.255	3877219.384	3251193.45	2397973.253	4439500.801	1	1	0.540144796	-0.267489804	0.007250124	2.139654566
Q63011	Zero beta-globin (Fragment) OS=Rattus norvegicus OX=10116 PE=3 SV=1	67	11	559	4	1	146	15.9	7.3	1347.75	11	5	1230444448	813515229.1	771324685.9	1100590327	703608777.4	776125203.8	638656689.8	144851982	887697987.1	234804057	428437097.8	579876835	485720774.8	899268111.9	1	1	0.540128987	-0.267502515	0.015422381	1.811848572
Q8R490	Cadherin 13 OS=Rattus norvegicus OX=10116 GN=Cdh13 PE=1 SV=1	11	5	27	5	1	714	78	5.15	72.28	5	0	12087866.96	15854824.42	17018783.24	14931917.83	11575169.53	21999199.65	16133149.83	2872513.189	10497120.94	5547798.328	4462086.736	10912056.84	8404120.976	15577960.27	1	1	0.539487894	-0.268018296	0.01874463	1.727123128
D4A5F1	Polycystin 2, transient receptor potential cation channel OS=Rattus norvegicus OX=10116 GN=Pkd2 PE=1 SV=1	1	1	4	1	1	966	109	5.6	9.8	1	0	720804.6059	998865.3125	1265367.699	1503726.074	989673.2976	1267593.856	572495.951	NA	687306.8507	511875.145	528747.7606	725821.6033	605249.4621	1124338.474	0.833333333	1	0.538316064	-0.26896266	0.003216162	2.492662084
P0DMW0	Heat shock 70 kDa protein 1A OS=Rattus norvegicus OX=10116 GN=Hspa1a PE=2 SV=1	44	23	340	20	1	641	70.1	5.82	831.95	23	0	120826444.2	113997759.7	131882878.9	106660882.4	139243075.4	105119537.9	99421848.31	4926306.024	77391559.18	60893345.3	61970950.73	81732112.53	64389353.68	119621763.1	1	1	0.538274575	-0.268996133	0.003250655	2.488029121
B1WBW4	Armadillo repeat-containing protein 10 OS=Rattus norvegicus OX=10116 GN=Armc10 PE=1 SV=1	38	8	70	8	1	306	33.4	7.97	172.3	8	0	9916800.486	10799441.62	18154165.65	13040086.4	11510758.66	9866556.812	4936995.55	4715764.531	3792819.255	8178844.897	11253646.14	6559601.394	6572945.295	12214634.94	1	1	0.538120486	-0.269120474	0.007990964	2.097400826
F1LP05	ATP synthase subunit alpha OS=Rattus norvegicus OX=10116 GN=Atp5f1a PE=1 SV=1	53	25	554	25	1	553	59.8	9.26	1306.88	25	0	712054109.6	867489639.3	1241219629	1242796556	800455152	683331568	735873969.7	650219279.7	291035277.8	479671438.4	379983057.2	446457291.1	497206719	924557775.7	1	1	0.537777878	-0.269397067	0.006334183	2.198309394
Q4FZV0	Beta-mannosidase OS=Rattus norvegicus OX=10116 GN=Manba PE=2 SV=1	12	8	35	8	1	881	101.2	7.24	97.39	8	0	4650081.764	5370699.172	5020420.187	7180402.692	7217943.671	6920984.754	1917039.125	6516305.06	417029.2718	4275189.441	4447636.044	1967750.732	3256824.945	6060088.707	1	1	0.537421992	-0.269684566	0.020958182	1.678646393
G3V632	Epimorphin, isoform CRA_a OS=Rattus norvegicus OX=10116 GN=Stx2 PE=1 SV=1	14	3	20	3	1	290	33.3	6.76	54.68	3	0	2206416.968	1450165.625	1930052.107	1087426.36	2874248.319	2023672.467	777625.1288	575182.5397	1715003.115	NA	849219.4912	1264935.229	1036393.101	1928663.641	0.833333333	1	0.537363322	-0.26973198	0.025687781	1.59027341
A0A096MKC1	Tyrosine-protein kinase OS=Rattus norvegicus OX=10116 GN=Fyn PE=1 SV=1	26	14	124	6	1	534	60.1	6	233.04	14	0	2661761.917	3942006.359	4007995.293	3613850.535	5460216.001	4611507.849	2959001.412	502740.1142	2458848.558	2446430.628	2730064.33	1957036.8	2175686.974	4049556.326	1	1	0.537265517	-0.269811033	0.005262711	2.278790478
D4ABM3	Dishevelled associated activator of morphogenesis 1 (Predicted) OS=Rattus norvegicus OX=10116 GN=Daam1 PE=1 SV=1	11	9	18	9	1	968	112.6	6.87	37.47	9	0	7796525.699	9033655.781	8359021.166	6591230.078	7558358.528	7734109.648	3506915.881	3421745.01	5541494.795	2514083.016	3920681.507	6224266.409	4188197.77	7845483.483	1	1	0.533835522	-0.272592531	0.000260533	3.58413726
Q6Q7Y5	Guanine nucleotide-binding protein subunit alpha-13 OS=Rattus norvegicus OX=10116 GN=Gna13 PE=1 SV=1	50	16	177	14	1	377	44	8.21	360.18	16	1	54971598.92	59973449.63	45157729	49788925.73	63023378.99	65931125.59	26779907.86	7941683.349	45522545.41	18534380.33	37628339.48	44378150.56	30130834.5	56474367.98	1	1	0.53353115	-0.272840219	0.003576443	2.446548692
F1LRS8	CD2-associated protein OS=Rattus norvegicus OX=10116 GN=Cd2ap PE=1 SV=2	18	9	56	8	1	637	70.4	6.38	101.55	9	1	10443583.41	12006949.47	19913033.5	15778437.24	9659548.724	16127740.22	17633869.17	2554487.804	9291740.782	2030592.912	5109001.922	8117649.731	7456223.719	13988215.43	1	1	0.533036094	-0.273243382	0.045154842	1.345295673
Q6AYD4	Endothelial cell-selective adhesion molecule OS=Rattus norvegicus OX=10116 GN=Esam PE=1 SV=1	36	9	75	9	1	394	41.9	9.23	186.52	9	0	19862207.48	27452899.55	18102546.53	16610100.51	23903708.7	23642656.87	10535376.45	1214734.322	8606379.429	16438608.4	15906994.68	16296064.19	11499692.91	21595686.61	1	1	0.532499527	-0.273680774	0.006864188	2.16341083
A0A0G2K639	Polymeric immunoglobulin receptor OS=Rattus norvegicus OX=10116 GN=Pigr PE=1 SV=1	26	18	231	18	1	782	86.9	6.39	636.23	18	0	76914405.36	67851256.75	47520745.74	49826095.31	71049560.21	67195695.13	26675967.85	55527992.41	17826906.27	45080449.25	35039327.09	22264544.67	33735864.59	63392959.75	1	1	0.532170524	-0.273949184	0.003052713	2.515314024
Q63362	NADH dehydrogenase [ubiquinone] 1 alpha subcomplex subunit 5 OS=Rattus norvegicus OX=10116 GN=Ndufa5 PE=1 SV=3	44	5	50	5	1	116	13.4	7.43	143.32	5	0	10862910.6	14380699.38	27730463.05	19950108.59	10541730.09	16170233.54	4597839.561	12880124.37	3724423.969	15119731.56	10683644.98	6006592.583	8835392.838	16606024.21	1	1	0.532059494	-0.274039803	0.038952719	1.409462222
O35568	EGF-containing fibulin-like extracellular matrix protein 1 OS=Rattus norvegicus OX=10116 GN=Efemp1 PE=1 SV=1	21	7	26	7	1	493	54.6	5.11	51.92	7	0	3437878.067	4542778.5	4479323.917	4238964.644	5328541.41	5125194.411	157810.2002	NA	1667354.008	4760359.201	2689828.101	2755763.102	2406222.922	4525446.825	0.833333333	1	0.531709468	-0.274325606	0.019240104	1.715792585
P21451	Endothelin receptor type B OS=Rattus norvegicus OX=10116 GN=Ednrb PE=2 SV=2	12	5	33	5	1	442	49.4	9.36	70.07	5	0	7715469.555	9023826.438	8146544.576	5930152.255	8809942.195	6811212.188	1235194.423	NA	5172994.856	2490288.107	5833824.952	5837711.851	4114002.838	7739524.535	0.833333333	1	0.531557568	-0.274449694	0.005863586	2.231836701
A0A0G2K401	Propionyl-CoA carboxylase alpha chain, mitochondrial OS=Rattus norvegicus OX=10116 GN=Pcca PE=1 SV=1	31	19	125	19	1	723	79.8	7.21	302.29	19	0	36633564.1	48441869.41	67915115.26	66890583.5	48955484.02	37764471.02	23017978.31	55763178.72	15740290.2	27080135.67	22926574.11	18316126.88	27140713.98	51100181.22	1	1	0.531127549	-0.274801172	0.014791068	1.830000466
P20788	Cytochrome b-c1 complex subunit Rieske, mitochondrial OS=Rattus norvegicus OX=10116 GN=Uqcrfs1 PE=1 SV=2	29	8	102	8	1	274	29.4	8.87	187.89	8	0	39100597.13	44273692.3	102083886.9	59796872.42	43596830.99	45908068.24	16507385.35	39795116.23	18449061.53	20231572.04	44482580.05	37826053.17	29548628.06	55793324.66	1	1	0.529608663	-0.27604492	0.037440684	1.426656226
Q9QYN5	B-cell lymphoma/leukemia 10 OS=Rattus norvegicus OX=10116 GN=Bcl10 PE=2 SV=1	4	1	3	1	1	233	26	6.25	6.25	1	0	702855.5803	1709127.375	1094767.953	1797350.118	1088601.743	1952276.095	956866.4783	NA	1020455.607	472363.0247	820825.7861	411545.8104	736411.3414	1390829.811	0.833333333	1	0.529476242	-0.276153522	0.028374259	1.547075471
P62994	Growth factor receptor-bound protein 2 OS=Rattus norvegicus OX=10116 GN=Grb2 PE=1 SV=1	33	7	56	7	1	217	25.2	6.32	110.15	7	0	17294228.02	18125162.31	14377765.85	15819408.95	17874701.13	17425049.02	11519549.35	2270830.915	11522100.56	6001812.827	11512621.72	10548017.6	8895822.163	16819385.88	1	1	0.528902912	-0.276624042	0.000867604	3.061678454
Q6AY58	B-cell receptor-associated protein 31 OS=Rattus norvegicus OX=10116 GN=Bcap31 PE=1 SV=1	38	11	190	11	1	245	27.9	8.88	511.23	11	0	100031800.8	95887446.65	161731999.5	101324470.8	121542100.7	121022177	23780457.46	78285998.89	49158318.27	55528755.03	68315854.87	95345672.82	61735842.89	116923332.6	1	1	0.528002765	-0.277363803	0.003110048	2.507232908
Q03346	Mitochondrial-processing peptidase subunit beta OS=Rattus norvegicus OX=10116 GN=Pmpcb PE=1 SV=3	11	5	27	5	1	489	54.2	6.7	56.25	5	0	4898711.407	11439643.92	13542101.91	14222356.73	9450599.87	10924009.36	4960159.571	10872960.57	4340598.761	9678975.375	2120519.443	1976270.616	5658247.39	10746237.2	1	1	0.526532896	-0.27857449	0.033458911	1.475488198
P35284	Ras-related protein Rab-12 OS=Rattus norvegicus OX=10116 GN=Rab12 PE=1 SV=2	49	11	135	10	1	243	27.3	8.41	303.05	11	0	17701804.95	14029632.63	12888814.53	12065915.97	15813491.25	11661484.67	7998382.232	187648.6625	9853901.732	3191564.953	8677012.583	14365977.78	7379081.323	14026857.33	1	1	0.526068038	-0.278958084	0.014860918	1.827954362
B0BMV4	Yip1 interacting factor homolog (S. cerevisiae) OS=Rattus norvegicus OX=10116 GN=Yif1a PE=1 SV=1	5	1	7	1	1	293	32	9.09	19.1	1	0	33340999.53	63494002.5	76752215.45	58974409.71	44608602.09	74067252.4	50771022.33	13224779.45	42320295.76	26335640.41	24290224.96	27629012.1	30761829.17	58539580.28	1	1	0.525487696	-0.279437448	0.010410136	1.982543597
A9UMW1	Glutathione S-transferase alpha 4 OS=Rattus norvegicus OX=10116 GN=Gsta4 PE=2 SV=1	27	8	98	6	1	222	25.5	7.33	171.29	8	0	34240275.95	38154007.06	31122307.03	30455935.4	36941552.38	20775923.77	24553414.16	12539529.55	20751645.73	2961399.061	19575624.21	20253410.79	16772503.92	31948333.6	1	1	0.524988381	-0.279850308	0.004028335	2.39487442
P63039	60 kDa heat shock protein, mitochondrial OS=Rattus norvegicus OX=10116 GN=Hspd1 PE=1 SV=1	55	28	520	28	1	573	60.9	6.18	1384.9	28	0	328469767.7	519394057.8	804398872.8	664635086.6	466282951.9	472420311.6	309515993.2	391013177	115446291.1	429701922.8	257178092	206096291.9	284825294.7	542600174.7	1	1	0.524926655	-0.279901374	0.011490071	1.939677288
Q6QI17	LRRGT00191 OS=Rattus norvegicus OX=10116 PE=2 SV=1	1	2	26	2	1	1687	194	9.23	85.68	2	0	7204683.624	7626523.031	8319674.706	7115242.79	8243091.849	8423889.187	2508319.809	1381275.748	4923178.813	5234040.235	5388562.318	5199509.652	4105814.429	7822184.198	1	1	0.524893601	-0.279928722	0.000524306	3.280415172
E9PT23	Putative sodium-coupled neutral amino acid transporter 10 OS=Rattus norvegicus OX=10116 GN=Slc38a10 PE=1 SV=2	6	5	6	5	1	1099	118.7	5.83	14.3	5	0	1504832.641	1426459.094	2356929.813	1721590.555	2001023.241	1941679.204	612390.4855	298056.0034	1095051.896	812881.5329	1231576.817	1693294.297	957208.5053	1825419.091	1	1	0.524377394	-0.280356039	0.005403815	2.267299527
F1M124	Cordon-bleu WH2 repeat protein-like 1 OS=Rattus norvegicus OX=10116 GN=Cobll1 PE=1 SV=2	16	13	44	13	1	1223	130.8	7.06	119.32	13	0	9461428.407	8466395.656	10437881.78	10691538.13	6953669.055	6486586.904	7783211.835	8895378.658	3285253.482	2262721.627	1006243.027	4271512.929	4584053.593	8749583.322	1	1	0.523916788	-0.280737685	0.017423786	1.758857472
Q5U1W6	MICOS complex subunit OS=Rattus norvegicus OX=10116 GN=Apool PE=1 SV=1	24	4	25	4	1	254	28.2	9.01	64.52	4	0	4538187.137	6916321.047	9108773.12	7420053.663	4265733.292	6023568.224	3530698.732	NA	325489.6063	4795463.809	4744610.566	3235652.661	3326383.075	6378772.747	0.833333333	1	0.521476969	-0.282764867	0.022126057	1.655095973
Q642B0	Glypican 4 OS=Rattus norvegicus OX=10116 GN=Gpc4 PE=1 SV=1	9	4	24	4	1	557	62.5	6	58.17	4	0	6419184.823	4714094.641	4196321.47	4584301.232	4798159.745	2997545.539	2085297.395	1543223.965	2889697.188	2884948.848	2548666.9	2494173.462	2407667.96	4618267.908	1	1	0.521335706	-0.282882529	0.001250329	2.902975696
Q6AYP5	Cell adhesion molecule 1 OS=Rattus norvegicus OX=10116 GN=Cadm1 PE=1 SV=1	8	2	18	2	1	476	51.8	4.83	49.98	2	0	3882440.114	4464764.203	3192476.417	3250666.16	4910721.905	4376604.04	1737861.811	696260.5832	1551855.191	1538498.969	2997153.559	3990198.956	2085304.845	4012945.473	1	1	0.51964445	-0.284293707	0.006501879	2.186961117
G3V804	Sideroflexin OS=Rattus norvegicus OX=10116 GN=Sfxn3 PE=1 SV=1	35	10	170	1	1	321	35.4	9.69	391.17	10	9	49546188.32	58718976.46	80427094.45	75407808.68	66326291.58	56457194.5	38230602.92	6838469.589	26353167.77	22206506.45	51854347.62	55479617.3	33493785.28	64480592.33	1	1	0.519439789	-0.284464787	0.006296366	2.200910035
A0A0G2JXT9	Rho guanine nucleotide exchange factor (GEF) 17 OS=Rattus norvegicus OX=10116 GN=Arhgef17 PE=1 SV=1	1	2	8	2	1	2056	221.9	6.28	23.97	2	0	2590983.215	2583613.938	2450522.427	1914610.6	1869207.319	3264491.304	1207976.874	325003.6675	2051015.369	988466.5181	1068861.045	1977184.157	1269751.272	2445571.467	1	1	0.519204321	-0.284661702	0.00605671	2.21776322
Q8R3Z7	EH-domain-containing 4 OS=Rattus norvegicus OX=10116 GN=Ehd4 PE=1 SV=1	60	28	624	25	1	541	61.4	6.76	1472.65	28	3	454714270.3	480558090.2	311857029.2	328148537.3	521756979.6	356698680.4	276405280.3	15874573.29	230969685.3	105523981.4	247128507.6	395790290.1	211948719.7	408955597.8	1	1	0.518268293	-0.28544536	0.012971675	1.887003941
M0R8W9	CD177 antigen-like OS=Rattus norvegicus OX=10116 GN=LOC100909700 PE=4 SV=1	23	12	139	1	1	819	86.8	5.87	361.05	12	10	32045783.74	32761284.61	60304894.38	43883824.76	49736607.51	39180653.52	9710422.075	67442.50928	25199925.98	30878795.76	19977935.2	47804665.54	22273197.84	42985508.09	1	1	0.518155975	-0.28553949	0.028751211	1.541343858
G3V9D7	Adducin 3 (Gamma), isoform CRA_a OS=Rattus norvegicus OX=10116 GN=Add3 PE=1 SV=1	23	12	110	12	1	705	78.8	5.95	261.37	12	0	23587359.15	28163456.84	22503791.3	19367649.56	24297418.16	23852473.32	11462973	1093848.361	12099236.17	15765195.46	15995581.51	16931853.3	12224781.3	23628691.39	1	1	0.517370222	-0.286198571	0.001634649	2.786575487
D4A5Z0	Hexosyltransferase OS=Rattus norvegicus OX=10116 GN=Csgalnact2 PE=3 SV=1	9	4	17	4	1	542	62.6	5.73	38.73	4	0	2639560.837	3100508.414	2760764.526	1880480.814	3087219.177	2489887.11	627538.4249	NA	1391478.23	658726.5025	1698275.085	2501179.218	1375439.492	2659736.813	0.833333333	1	0.517133682	-0.286397175	0.007670564	2.115172702
B5DEL8	NADH dehydrogenase (Ubiquinone) Fe-S protein 5 OS=Rattus norvegicus OX=10116 GN=Ndufs5 PE=1 SV=1	44	4	46	4	1	106	12.7	8.92	71.68	4	0	14758468.19	16903661.47	27531703.86	20917991.44	17367336.34	10876287.95	6941848.068	7939173.726	5039189.929	15603340.83	12795922.87	7685196.683	9334112.016	18059241.54	1	1	0.516860688	-0.286626499	0.011841586	1.926590127
A0A0A1FZ34	Cytochrome c oxidase subunit 1 OS=Rattus norvegicus OX=10116 GN=COX1 PE=3 SV=1	2	1	12	1	1	514	56.9	6.8	10.07	1	0	15595494.99	20347201	34114639.35	31466859.59	17317496.57	18241982.81	3202679.997	14534141.88	4069389.09	11629417.91	22669921.35	14727973.49	11805587.28	22847279.05	1	1	0.516717429	-0.286746889	0.030824267	1.511107242
A0A0G2JZH0	Calcium-binding protein 39 OS=Rattus norvegicus OX=10116 GN=Cab39 PE=1 SV=1	34	12	93	8	1	341	39.8	6.89	150	12	4	32911371.51	40169733.63	28503868.47	31032148.36	37341700.31	25429280.84	14886200.94	4391070.06	18044466.38	17943260.59	21496642.59	24188397.3	16825006.31	32564683.85	1	1	0.516664199	-0.286791631	0.001380665	2.859911684
G3V7P9	Hyaluronidase OS=Rattus norvegicus OX=10116 GN=Hyal2 PE=1 SV=1	5	3	7	3	1	473	53.9	7.25	9.47	3	0	3873173.98	4225277.25	2129687.077	2463909.502	3965209.24	3397604.198	1969434.37	73052.40323	2056856.786	1723113.514	1771497.075	2763361.417	1726219.261	3342476.875	1	1	0.516449126	-0.286972453	0.009560901	2.019501179
Q5BJS2	LHFPL tetraspan subfamily member 6 protein OS=Rattus norvegicus OX=10116 GN=Lhfpl6 PE=2 SV=1	19	3	17	3	1	200	21.7	7.39	35.7	3	0	1770089.724	3283396.766	3320292.554	2460547.572	2822789.15	3918624.384	1952369.538	72667.29916	1269789.052	1169752.479	2042479.019	2558887.988	1510990.896	2929290.025	1	1	0.515821541	-0.287500525	0.013066426	1.883843187
Q5FVL6	Tetraspanin-13 OS=Rattus norvegicus OX=10116 GN=Tspan13 PE=2 SV=1	19	3	22	3	1	204	22.2	8.37	51.78	3	0	21863635.56	23616520.06	20243596.44	19357949.32	27211899.27	25199432.99	11902966.62	NA	14517724.74	8323791.866	10252778.89	14028719.84	11805196.39	22915505.61	0.833333333	1	0.515161943	-0.288056227	0.000112614	3.948407615
D3ZC63	Cytidine/uridine monophosphate kinase 2 OS=Rattus norvegicus OX=10116 GN=Cmpk2 PE=1 SV=3	19	6	33	6	1	447	50.1	7.24	88.41	6	0	2029014.057	5767091.563	8236910.875	8557627.367	6085925.625	5579642.26	1376671.784	2904082.761	5098331.177	4748073.686	1152874.111	3378611.023	3109774.09	6042701.958	1	1	0.514633042	-0.288502333	0.031182115	1.506094431
D4A0Z1	Tetraspanin OS=Rattus norvegicus OX=10116 GN=Tspan14 PE=1 SV=1	13	3	4	3	1	270	30.7	6.51	9.8	3	0	3522079.497	3813156.75	3968506.945	2584654.218	3119221.23	5371624.264	234509.7287	457472.4145	1765802.947	2268285.934	3394448.027	3379786.507	1916717.593	3729873.817	1	1	0.513882691	-0.28913601	0.023812384	1.623197123
Q9ER34	Aconitate hydratase, mitochondrial OS=Rattus norvegicus OX=10116 GN=Aco2 PE=1 SV=2	48	32	679	32	1	780	85.4	7.83	1628.75	32	0	227426207.6	324269758.2	324591051.1	447576861.4	346763449.6	256875872	178888598.6	99440624.5	128486670	224348826.3	174139127.1	184416547.4	164953399	321250533.3	1	1	0.513472763	-0.289482588	0.001528068	2.815857319
D3ZTN2	COX assembly mitochondrial protein OS=Rattus norvegicus OX=10116 GN=Cmc1 PE=1 SV=2	9	1	4	1	1	106	12.6	8.24	8.95	1	0	NA	1720007.25	2477900.231	2529077.114	1136118.539	1975296.002	1129459.407	1281423.495	377200.0276	1251095.303	NA	NA	1009794.558	1967679.827	0.666666667	0.833333333	0.513190482	-0.289721407	0.028132196	1.550796365
F7EPE0	Prosaposin OS=Rattus norvegicus OX=10116 GN=Psap PE=1 SV=2	25	12	142	12	1	557	61.4	5.2	312.84	12	0	113941772.8	128428306.7	209062889	168380691.7	110457584.7	239806670.9	68275298.72	55083189.93	36808547.17	133278728.3	122999812.1	79933989.15	82729927.55	161679652.6	1	1	0.511690409	-0.290992723	0.014846306	1.828381592
Q68FY0	Cytochrome b-c1 complex subunit 1, mitochondrial OS=Rattus norvegicus OX=10116 GN=Uqcrc1 PE=1 SV=1	40	14	340	14	1	480	52.8	5.88	878.51	14	0	139772971.7	162680501.9	352567555.9	284460027.5	148017938	146323027	97277615.16	114548442.9	58740304.45	176112510.1	102951805.7	81209024.57	105139950.5	205637003.7	1	1	0.511289061	-0.291333499	0.03181223	1.497405886
Q62651	Delta(3,5)-Delta(2,4)-dienoyl-CoA isomerase, mitochondrial OS=Rattus norvegicus OX=10116 GN=Ech1 PE=1 SV=2	39	10	116	10	1	327	36.1	7.99	290.29	10	0	41972805.07	70815886.13	56002940.74	78752352.59	64507668.27	38070422.27	30086848.61	43239316.19	16222900.82	37633152.12	26797219.15	24745698.62	29787522.58	58353679.18	1	1	0.510465201	-0.292033859	0.003882686	2.41086773
A0A0G2KBB9	Ankyrin 2 OS=Rattus norvegicus OX=10116 GN=Ank2 PE=1 SV=1	2	8	44	3	1	3963	433.3	5.16	47.36	8	0	543119.8514	659230.3125	642970.1763	643434.2292	931726.3195	499231.4993	327551.8554	165764.8979	365412.6157	473417.1612	NA	NA	333036.6325	653285.398	0.666666667	1	0.509787351	-0.292610945	0.008293907	2.081240839
Q924S5	Lon protease homolog, mitochondrial OS=Rattus norvegicus OX=10116 GN=Lonp1 PE=2 SV=1	29	22	164	22	1	950	105.7	6.6	347.28	22	0	37134164.05	61228196.23	81919953.63	76886430.26	64672164.77	68171968.08	29229746.01	48207754.64	15269936.39	39270042.85	37768704.62	28811274.12	33092909.77	65002146.17	1	1	0.509104879	-0.293192741	0.002346331	2.629610721
A0A0G2JVR9	Rho family-interacting cell polarization regulator 1 OS=Rattus norvegicus OX=10116 GN=Ripor1 PE=1 SV=1	23	19	139	19	1	1231	133.2	6.02	366.71	19	0	29869558.8	29551284.58	27470080.93	24265131.25	28172350.71	19990377.97	24496578.93	791770.7665	17513275.98	8764465.733	9739726.919	19670333.51	13496025.31	26553130.71	1	1	0.508264937	-0.293909849	0.00687993	2.16241598
B1PLB1	CD34 antigen (Predicted) OS=Rattus norvegicus OX=10116 GN=Cd34 PE=1 SV=1	22	7	108	7	1	386	41.2	5.49	258.02	7	0	80652956.78	93925396.5	72215918.04	67929869.11	98225698.3	86654278.43	46673613.35	367906.3969	56325825.77	32759191.49	47467510.68	70323621.76	42319611.57	83267352.86	1	1	0.508237744	-0.293933085	0.003827087	2.417131665
D3ZUX5	MICOS complex subunit OS=Rattus norvegicus OX=10116 GN=Chchd3 PE=1 SV=1	43	10	130	10	1	227	26.4	8.13	348.21	10	0	54471170.44	68348707.28	109776069.7	86735434.49	72248979.11	79434890.13	34273512.85	27016196.01	24389149.6	46721276.62	63055565.22	42934969.46	39731778.29	78502541.86	1	1	0.506120915	-0.295745715	0.002455206	2.609912063
G3V729	Bone marrow proteoglycan OS=Rattus norvegicus OX=10116 GN=Prg2 PE=1 SV=1	5	1	17	1	1	227	25.1	6	41.37	1	0	4206929.157	11918047	12574518.36	13663596.6	9829280.46	11949142.33	8910424.67	1671231.323	2510046.211	3337733.823	9331562.324	6691575.751	5408762.35	10690252.32	1	1	0.505952731	-0.295890056	0.022054457	1.65650363
B1WC61	Acad9 protein OS=Rattus norvegicus OX=10116 GN=Acad9 PE=1 SV=1	32	17	114	17	1	625	68.8	7.69	298.19	17	0	18478442.78	33942703.13	52027524.38	41168166.49	52543893.97	27919683.42	19413372.1	23402850.93	7567753.668	29219762.83	22214728.14	12363407.77	19030312.57	37680069.03	1	1	0.505049833	-0.296665768	0.015368616	1.813365241
D3ZJP6	Unconventional myosin-X OS=Rattus norvegicus OX=10116 GN=Myo10 PE=1 SV=1	1	2	4	2	1	2060	237.1	6.3	9.88	2	0	650932.7769	1009635.891	591675.9531	893457.6335	826299.9279	959697.992	515830.7776	496191.2904	697344.8077	477518.3038	130111.9156	173385.3581	415063.7422	821950.0291	1	1	0.504974424	-0.296730618	0.004783794	2.32022753
Q6P9W6	Rab3b protein OS=Rattus norvegicus OX=10116 GN=Rab3b PE=2 SV=1	23	5	109	1	1	228	25.9	5.21	245.82	5	0	NA	1230453.875	1356323.332	2047671.93	1314037.485	2413286.436	648853.1859	574510.1531	984488.6601	646077.4227	1361660.472	NA	843117.9787	1672354.612	0.833333333	0.833333333	0.50415024	-0.297440022	0.017660354	1.753000595
A0A0G2K1Q8	ATP-binding cassette subfamily A member 3 OS=Rattus norvegicus OX=10116 GN=Abca3 PE=1 SV=1	25	36	578	36	1	1704	191.6	7.11	1336.19	36	0	214854869.4	279368263.2	266415041.7	221630404.9	289425817.3	318702433.2	114042851.6	11677738.37	150502700.5	171913484	208074782.3	145380832.4	133598731.5	265066138.3	1	1	0.504020364	-0.297551916	0.002127634	2.672103078
D3ZZX1	Inositol polyphosphate-5-phosphatase A OS=Rattus norvegicus OX=10116 GN=Inpp5a PE=1 SV=1	22	9	47	9	1	412	47.6	6.92	88.24	9	0	16516279.68	23440923.48	17813098.87	14262545.35	26583193.28	24277683.99	8274760.639	2769390.694	13861516.86	8983689.393	13787661.09	14251124.15	10321357.14	20482287.44	1	1	0.503916233	-0.297641651	0.004035263	2.394128155
P97532	3-mercaptopyruvate sulfurtransferase OS=Rattus norvegicus OX=10116 GN=Mpst PE=1 SV=3	47	10	91	10	1	297	32.9	6.32	184.23	10	0	15878361.62	23731440.63	36475035.21	41611572.77	26423084.21	21007346.95	14799816.12	17782468.73	6673154.357	18644775.07	13744017.02	11538142.33	13863728.94	27521140.23	1	1	0.503748348	-0.297786365	0.01055666	1.976473466
G3V8W2	Phosphatidate cytidylyltransferase OS=Rattus norvegicus OX=10116 GN=Cds2 PE=1 SV=1	14	4	43	3	1	444	51.4	7.05	109.63	4	1	15490725.06	12592173.83	22762077.48	11217784.01	10864157.48	21303722.86	4404762.478	2455417.173	4074503.492	19937572.88	5244072.738	11266483.2	7897135.326	15705106.79	1	1	0.50283869	-0.298571314	0.046394697	1.333531657
F1LXR9	Lymphoid-restricted membrane protein OS=Rattus norvegicus OX=10116 GN=Lrmp PE=1 SV=3	10	4	8	4	1	536	59.3	5.57	20.39	4	0	950721.9543	1221930.609	556162.4179	567327.646	1284347.629	1046696.885	559973.5369	NA	348050.7801	235174.3754	465147.65	748068.3063	471282.9297	937864.5235	0.833333333	1	0.502506405	-0.298858398	0.018641355	1.729522523
Q05962	ADP/ATP translocase 1 OS=Rattus norvegicus OX=10116 GN=Slc25a4 PE=1 SV=3	42	14	348	8	1	298	33	9.79	713.24	14	0	210073318.2	186925328.7	262091896.6	215361060.6	180751267.7	134508592.3	68134874.27	14742079.02	98788097.26	139505719.3	171434001.9	105134503.6	99623212.56	198285244	1	1	0.502423733	-0.298929854	0.005826498	2.234592398
Q9Z122	Acyl-CoA 6-desaturase OS=Rattus norvegicus OX=10116 GN=Fads2 PE=1 SV=1	2	1	2	1	1	444	52.3	8.82	3.67	1	0	1084417.339	1495825.625	1606079.381	1652809.05	NA	1667084.842	542594.828	1062905.268	NA	656380.7878	752429.8418	NA	753577.6815	1501243.247	0.666666667	0.833333333	0.501969073	-0.29932304	0.002075826	2.682809053
Q5RJN0	NADH dehydrogenase (Ubiquinone) Fe-S protein 7 OS=Rattus norvegicus OX=10116 GN=Ndufs7 PE=1 SV=1	24	4	52	4	1	218	23.9	9.99	177.45	4	0	9879018.339	10735187.97	23557067.57	16490577.42	13152564.85	9101061.946	7540424.549	8837599.111	3156165.634	8096983.926	8540479.749	5422400.958	6932342.321	13819246.35	1	1	0.501644022	-0.299604359	0.017011957	1.769245724
Q9JLS8	Leptin receptor gene-related protein OS=Rattus norvegicus OX=10116 GN=Leprot PE=1 SV=1	10	1	12	1	1	131	14.3	5.25	30.5	1	0	6466883.84	6015788.5	9466128.975	6072467.289	7134253.435	6564746.099	2046308.438	NA	NA	3413629.978	4706206.115	3782787.691	3487233.056	6953378.023	0.666666667	1	0.501516392	-0.299714868	0.002360509	2.626994339
P85834	Elongation factor Tu, mitochondrial OS=Rattus norvegicus OX=10116 GN=Tufm PE=1 SV=1	59	22	361	22	1	452	49.5	7.56	1038.94	22	0	110325720.4	160704660.3	267376692.3	273070470.8	183035606.2	153843983.9	103511669.4	86681053.12	59800593.65	144011664.3	96401614.09	85270594.52	95946198.19	191392855.6	1	1	0.501305014	-0.299897952	0.008206503	2.085841867
B1WC67	RCG29001 OS=Rattus norvegicus OX=10116 GN=Slc25a24 PE=1 SV=1	35	14	138	14	1	475	52.9	8.05	300.18	14	0	62917418.63	93487446.59	130742212.8	135916231.8	113225839.9	93943122.07	39932312.42	8701733.876	27693002.37	68061577.35	98877998.28	72275502.06	52590354.39	105038712	1	1	0.500675926	-0.30044329	0.013411459	1.872523974
P08461	Dihydrolipoyllysine-residue acetyltransferase component of pyruvate dehydrogenase complex, mitochondrial OS=Rattus norvegicus OX=10116 GN=Dlat PE=1 SV=3	31	14	136	14	1	632	67.1	8.53	322.15	14	0	45575807.19	77000629.48	103402544.2	93968528.28	78532219.44	58324551.59	53993537.5	18871817.16	16454264.54	73464146.19	34389988.1	31459373.77	38105521.21	76134046.7	1	1	0.500505659	-0.300591008	0.012627902	1.898668797
D3ZLT1	NADH dehydrogenase (Ubiquinone) 1 beta subcomplex, 7 (Predicted) OS=Rattus norvegicus OX=10116 GN=Ndufb7 PE=1 SV=1	45	5	31	5	1	137	16.6	8.46	56.1	5	0	4188010.401	5734562.156	7746947.754	5818907.013	5370614.481	5332550.676	1513421.119	3237538.563	1367169.999	3821164.059	4066097.67	3102273.886	2851277.55	5698598.747	1	1	0.500347134	-0.300728584	0.001643857	2.784135965
Q53AQ4	Transmembrane and ubiquitin-like domain-containing protein 1 OS=Rattus norvegicus OX=10116 GN=Tmub1 PE=1 SV=1	9	2	8	2	1	245	26.3	5.16	20.92	2	0	3155768.516	2861612.906	4359077.851	2580574.465	2919012.369	3863303.654	1832563.7	2501251.132	541732.0439	918216.0289	NA	2424233.131	1643599.207	3289891.627	0.833333333	1	0.499590684	-0.301385669	0.006738506	2.171436381
G3V8D2	Periaxin OS=Rattus norvegicus OX=10116 GN=Prx PE=1 SV=3	48	50	916	3	1	1383	146.2	8.1	1974.76	50	49	740030285.5	728520976.1	571230790.1	569861834.8	694714538	596620383.1	626759478.5	98244192.24	290232287.5	159096111.6	262120851.6	510783394.1	324539385.9	650163134.6	1	1	0.499166084	-0.301754931	0.004613867	2.335934929
A0A0G2JXY9	Epsin-2 OS=Rattus norvegicus OX=10116 GN=Epn2 PE=1 SV=1	17	8	41	8	1	604	64.6	8.24	108.11	8	0	6174231.857	6310928.453	3191782.286	7588181.937	4070745.288	4896454.1	4601238.006	42521.97816	4079850.302	1888211.705	1934306.116	3530478.236	2679434.391	5372053.987	1	1	0.498772797	-0.302097241	0.018599033	1.730509635
Q6Q0N3	5'-nucleotidase domain-containing protein 2 OS=Rattus norvegicus OX=10116 GN=Nt5dc2 PE=2 SV=2	5	3	21	3	1	553	63.6	7.17	44.05	3	0	1022917.712	2225107.313	2750832.956	2745505.314	1842600.763	2078935.525	434557.7557	82643.8224	263285.1951	1197768.474	1979581.058	2359351.445	1052864.625	2110983.264	1	1	0.498755553	-0.302112256	0.047916481	1.319515084
D4AE68	Guanine nucleotide binding protein, alpha q polypeptide, isoform CRA_a OS=Rattus norvegicus OX=10116 GN=Gnaq PE=1 SV=2	46	15	251	9	1	359	42.1	5.68	608.56	15	4	130768477.4	152690667.2	105942957.9	92374054.02	124052142.8	146628750.5	65930617.24	12386100.96	84841939.11	55039628.88	66502844.11	90293778.1	62499151.4	125409508.3	1	1	0.498360549	-0.302456344	0.001679609	2.774791807
Q5BJT2	Ubiquitin-like protein 3 OS=Rattus norvegicus OX=10116 GN=Ubl3 PE=3 SV=1	25	3	10	3	1	117	13.2	6.92	25.14	3	0	3050859.475	4655551.813	6400026.749	6639204.473	5988575.456	5678291.247	4037778.974	533868.9578	554974.7541	4521753.164	2382864.113	4071663.468	2683817.238	5402084.869	1	1	0.49681138	-0.303808465	0.014451851	1.840076525
A0A0G2JZA2	GrpE protein homolog OS=Rattus norvegicus OX=10116 GN=Grpel1 PE=1 SV=1	17	4	23	4	1	230	25.8	8.15	53.05	4	0	5593186.701	8397063.344	14935118.34	11706492.5	10865488.36	7595930.167	6548567.686	6841299.443	237515.7164	7030047.909	5241318.831	3455331.757	4892346.89	9848879.901	1	1	0.496741451	-0.303869598	0.017192705	1.764655789
A0A0G2JTU0	Rho guanine nucleotide exchange factor 15 OS=Rattus norvegicus OX=10116 GN=Arhgef15 PE=1 SV=1	8	4	9	4	1	850	92.9	8.1	19.25	4	0	1756793.7	2406108.313	1876464.659	2210964.86	2089586.571	2383543.925	NA	NA	NA	628083.3548	759346.8904	1768848.83	1052093.025	2120577.005	0.5	1	0.496135261	-0.304399906	0.007081296	2.149887252
D3ZGA5	Rab interacting lysosomal protein (Predicted) OS=Rattus norvegicus OX=10116 GN=Rilp PE=1 SV=2	2	1	1	1	1	366	41	5.12	1.63	1	0	888076.5216	1191491.125	1130157.145	884322.0272	1216412.264	1234379	NA	NA	673291.1419	760258.4038	459739.0521	271234.1365	541130.6836	1090806.347	0.666666667	1	0.496083182	-0.304445496	0.001806058	2.743268307
D4A0T0	NADH:ubiquinone oxidoreductase subunit B10 OS=Rattus norvegicus OX=10116 GN=Ndufb10 PE=1 SV=1	56	9	92	9	1	176	20.8	7.69	230.09	9	0	52212914.26	55078634.61	109013606	77186320.06	50613661.79	73151008.19	23130286.93	54089697.08	20670647.38	46892268.64	33561591.22	28583662.27	34488025.59	69542690.82	1	1	0.495925958	-0.304583159	0.008051538	2.094121153
G3V7N0	Heparan sulfate 2-O-sulfotransferase 1 OS=Rattus norvegicus OX=10116 GN=Hs2st1 PE=1 SV=1	18	5	21	5	1	356	41.8	8.57	42.83	5	0	8686718.278	8448127.063	14354957.56	18996286.73	10847612.81	13914323.77	5239757.065	1094049.567	5620690.339	3872293.732	13165538.86	8279564.818	6211982.396	12541337.7	1	1	0.495320559	-0.305113646	0.022960208	1.639024182
Q5U1Z9	Metaxin 2 OS=Rattus norvegicus OX=10116 GN=Mtx2 PE=1 SV=1	21	6	32	6	1	263	29.7	5.34	83.35	6	0	6374942.843	9625357.875	9929898.504	10882361.76	7765040.868	8959484.183	2643091.987	5137368.241	2133927.882	5387328.185	5525648.36	5644251.53	4411936.031	8922847.672	1	1	0.49445381	-0.305874272	0.000651312	3.18621092
M0R7V3	MICOS complex subunit OS=Rattus norvegicus OX=10116 GN=Apoo PE=1 SV=2	11	2	19	2	1	198	22.6	9.23	40.27	2	0	3921503.092	5711395.281	8134580.277	7324496.7	7623232.484	5523039.773	4041339.795	2552312.555	2914402.501	2818952.057	3320426.276	3251285.779	3149786.494	6373041.268	1	1	0.494236011	-0.306065614	0.000839038	3.07621837
A0A0G2JSM7	Adducin 1 (Alpha), isoform CRA_b OS=Rattus norvegicus OX=10116 GN=Add1 PE=1 SV=1	37	20	145	19	1	735	80.3	6.15	391.83	20	1	47333955.07	46797270	40096242.71	40744919.98	60538485.18	54092778.85	26343720.95	4993763.387	25401406.43	26240997.25	25084089.14	34893225.05	23826200.37	48267275.3	1	1	0.493630523	-0.306597994	0.000815948	3.088337518
Q7TP38	Amine oxidase OS=Rattus norvegicus OX=10116 PE=2 SV=1	12	16	490	16	1	1640	183.4	7.46	1226.39	16	0	423828547	602330661.4	532002281.3	412767663.5	436448226.8	656354139.9	297578411	41759859.01	295550689.1	224559621.6	241130462.3	409775210.6	251725708.9	510621920	1	1	0.492978658	-0.307171882	0.00258204	2.588037034
A0A0G2JSJ8	Alpha-L-fucosidase OS=Rattus norvegicus OX=10116 GN=Fuca1 PE=1 SV=1	11	4	24	4	1	462	53.4	6.24	47.31	4	0	3816278.85	4069410.469	4586925.783	5724505.987	3703342.754	6916027.048	1153627.863	1940212.583	1465224.596	6140686.708	2146412.078	1342704.831	2364811.443	4802748.482	1	1	0.49238711	-0.307693325	0.025403928	1.595099127
A0A0G2K2M2	Mitochondrial fission factor OS=Rattus norvegicus OX=10116 GN=LOC102556337 PE=1 SV=1	7	3	11	3	1	353	39.7	8.94	26.3	3	0	2979486.851	7791459.813	10118203.67	4997015.439	5880322.176	6861840.445	3821283.456	1117357.728	2085200.056	4900569.906	3720950.893	3353952.522	3166552.427	6438054.732	1	1	0.491849255	-0.308167982	0.016742135	1.77618916
O88280	Slit homolog 3 protein OS=Rattus norvegicus OX=10116 GN=Slit3 PE=2 SV=1	6	7	23	7	1	1523	167.7	7.59	55.36	7	0	3631468.629	4260992.75	6303774.77	3978806.436	4406852.413	3944472.153	1995022.577	160798.0094	2786434.655	1931576.654	3427111.19	2729115.749	2171676.472	4421061.192	1	1	0.491211584	-0.3087314	0.004025398	2.395191174
Q38PG1	AHNAK 1 (Fragment) OS=Rattus norvegicus OX=10116 PE=2 SV=1	26	12	265	3	1	543	58.7	5.45	520.4	12	0	3596008.653	4325456.063	5590845.687	6878396.482	4707148.528	3872220.702	5773968.574	104233.1038	3239944.229	1648391.612	1068623.306	2362398.689	2366259.919	4828346.019	1	1	0.490076707	-0.309735939	0.027096728	1.567083148
Q68FX0	Isocitrate dehydrogenase [NAD] subunit beta, mitochondrial OS=Rattus norvegicus OX=10116 GN=Idh3B PE=2 SV=1	42	12	104	12	1	385	42.3	8.75	238.74	12	0	36766079.55	39505709.66	50626447.49	51996766.24	42042756.3	32904103.26	29578757.4	12081405.28	14205637.66	20000603.1	22106920.32	25269047.81	20540395.26	42306977.08	1	1	0.485508459	-0.313803199	0.000354412	3.450491582
B4F7E2	Arylsulfatase B OS=Rattus norvegicus OX=10116 GN=Arsb PE=2 SV=1	14	6	37	6	1	528	58.9	6.6	84.92	6	0	13483044.59	11777908.84	12518277.97	19622928.61	12297474.09	14101458.67	4136446.76	13839949.49	3033082.761	7335934.736	7674233.484	4588793.64	6768073.479	13966848.79	1	1	0.484581281	-0.314633366	0.0046971	2.328170194
Q5XIE1	Protein THEM6 OS=Rattus norvegicus OX=10116 GN=Them6 PE=2 SV=1	15	3	4	3	1	207	23.7	8.87	6.13	3	0	3114437.668	2249163.063	2473792.498	1832381.231	2841104.227	3322851.125	1158183.85	1301365.88	1172771.208	993639.9194	1671444.387	1359245.504	1276108.458	2638954.969	1	1	0.483565833	-0.315544392	0.000256698	3.590577515
A0A0G2K6D5	Pitrilysin metallopeptidase 1 OS=Rattus norvegicus OX=10116 GN=Pitrm1 PE=1 SV=1	18	14	53	14	1	1035	117.3	6.89	120.51	14	0	4036864.493	6002145.305	7861252.373	8819746.113	6109412.482	5716997.3	1832848.94	1531230.102	2249107.31	4351314.745	5179106.108	3474342.774	3102991.663	6424403.011	1	1	0.48300078	-0.316052168	0.004603516	2.336910343
F1LUT4	Phospholipid-transporting ATPase OS=Rattus norvegicus OX=10116 GN=Atp8a1 PE=1 SV=3	32	27	276	27	1	985	110.9	7.02	712.77	27	0	104342555.3	135160995.4	164504193.7	116827735.1	166195393.6	144645238.4	47446803.23	5765150.941	62191989.76	87143735.81	113849144.5	84801934.41	66866459.78	138612685.2	1	1	0.482397839	-0.316594646	0.003005734	2.522049456
B2RYS2	Cytochrome b-c1 complex subunit 7 OS=Rattus norvegicus OX=10116 GN=Uqcrb PE=1 SV=1	46	6	52	6	1	111	13.6	9.31	115.77	6	0	21057378.79	19875310.19	30274671.84	31497069.53	19532050.46	11469394.77	4650814.129	21492862.43	5216968.569	8677773.392	10675807.59	13748184.36	10743735.08	22284312.6	1	1	0.482121	-0.316843951	0.01599817	1.795929693
D3Z9L0	Acylglycerol kinase OS=Rattus norvegicus OX=10116 GN=Agk PE=1 SV=2	17	6	72	6	1	490	54.2	8.6	190.41	6	0	7686978.916	10776336.31	30168211.69	20392271.1	14754914.26	17631195.99	8341036.263	3036271.258	4039555.148	17508322.94	10520240.87	5436216.938	8146940.57	16901651.38	1	1	0.482020389	-0.316934591	0.04923659	1.307712033
Q68G49	Carboxylic ester hydrolase OS=Rattus norvegicus OX=10116 GN=LOC291863 PE=2 SV=1	41	23	583	9	1	565	62.1	6.3	1406.66	23	0	158622633.1	154070243.6	186724918.5	217932911.8	176495100.7	119185511.1	88475749.48	25512859.12	40132338.49	66469654.33	110953274.3	156726685	81378426.8	168838553.1	1	1	0.481989601	-0.316962332	0.004461291	2.350539448
Q499V1	Uridine phosphorylase OS=Rattus norvegicus OX=10116 GN=Upp1 PE=1 SV=1	11	3	6	3	1	312	34.1	6.73	13.65	3	0	1884818.112	3564085.75	3204432.634	3299201.347	2909365.229	2442424.267	NA	1142753.249	2058626.167	1018743.377	886546.3262	1843041.297	1389942.083	2884054.557	0.833333333	1	0.481940288	-0.317006767	0.002148464	2.667871919
A0A0G2K2I0	SUZ12 polycomb repressive complex 2 subunit OS=Rattus norvegicus OX=10116 GN=Suz12 PE=1 SV=1	2	1	1	1	1	740	82.8	9.33	2.29	1	0	2778169.503	3974995.5	5195587.189	5947233.134	3586345.557	3289219.355	2458166.393	NA	1326463.173	2698157.974	1574491.175	1846872.64	1980830.271	4128591.706	0.833333333	1	0.479783522	-0.318954672	0.005581149	2.253276383
F1LPG9	WASH complex subunit 2C OS=Rattus norvegicus OX=10116 GN=Washc2c PE=1 SV=2	11	10	31	10	1	1328	145	4.75	80.78	10	0	13897777.1	7822117.813	17892878.24	9839381.363	10141014.4	8859187.012	7317213.976	3011302.824	5005108.61	5533927.277	5383134.174	6586167.117	5472808.996	11408725.99	1	1	0.479703781	-0.319026858	0.005034833	2.29801493
G3V912	Thioredoxin domain containing 13 OS=Rattus norvegicus OX=10116 GN=Tmx4 PE=1 SV=1	4	1	7	1	1	336	37.5	4.35	15.47	1	0	1727373.587	1943388.375	2208327.223	1792270.459	2108811.203	2407845.96	729255.2718	636742.21	1556887.583	968584.2646	NA	NA	972867.3325	2031336.135	0.666666667	1	0.478929762	-0.319728174	0.001012644	2.994543206
F1LZ81	Dedicator of cytokinesis 4 OS=Rattus norvegicus OX=10116 GN=Dock4 PE=1 SV=3	2	4	27	4	1	1966	224.8	7.81	69.77	4	0	9375084.667	8189111.469	22098164.25	15869718.44	5289496.339	13239679.49	6983138.127	339247.2389	5017647.664	7760406.951	6923760.69	8416819.37	5906836.673	12343542.44	1	1	0.478536587	-0.320084852	0.041682039	1.380051044
P22831	Synaptoporin OS=Rattus norvegicus OX=10116 GN=Synpr PE=1 SV=2	3	1	1	1	1	265	29.1	6.52	1.78	1	0	5887237.292	4523825	3785011.506	4415414.506	3874006.846	4153953.787	664962.5341	NA	3954097.296	340165.3837	2577609.121	3086065.368	2124579.941	4439908.156	0.833333333	1	0.478518894	-0.32010091	0.0105622	1.976245613
P59215	Guanine nucleotide-binding protein G(o) subunit alpha OS=Rattus norvegicus OX=10116 GN=Gnao1 PE=1 SV=2	31	11	202	9	1	354	40	5.53	478.58	11	0	43339844.19	44955788	95052336.02	59295701.63	41470944.16	64434882.84	27019857.96	11789754.82	35058460.57	33453158.95	21307924.85	38134719.93	27793979.51	58091582.81	1	1	0.478451062	-0.320162477	0.008334078	2.079142439
B0K010	Thioredoxin domain-containing 17 OS=Rattus norvegicus OX=10116 GN=Txndc17 PE=1 SV=1	19	2	14	2	1	123	14.1	4.93	30.26	2	0	2750563.343	3268193.25	2342771.757	3014803.084	3431773.357	2288730.08	2613212.132	1546984.755	914639.1129	762821.4478	1281188.276	1059808.632	1363109.059	2849472.478	1	1	0.478372425	-0.320233862	0.001276971	2.893818965
A0A0H2UHB3	Carbonic anhydrase 4 OS=Rattus norvegicus OX=10116 GN=Car4 PE=1 SV=1	47	16	259	16	1	314	35.6	6.8	690.35	16	0	298204423.2	310031153.5	189702728.9	153878889.8	330038820.7	319000865.8	124114896	1805452.881	148160957.8	113765051	127049392.1	249936011.3	127471960.2	266809480.3	1	1	0.477763984	-0.320786592	0.0108052	1.96636719
F7DLY1	EPS8-like 2 OS=Rattus norvegicus OX=10116 GN=Eps8l2 PE=1 SV=2	30	17	124	17	1	729	82.2	7.2	333.53	17	0	36097187.36	52781305.17	22919157.21	29793567.97	46511039.28	31394122.62	24389505.64	10632318.05	14951830.8	12002640.21	19744741.57	23081437.19	17467078.91	36582729.94	1	1	0.477467891	-0.321055829	0.003918258	2.406906971
P19836	Choline-phosphate cytidylyltransferase A OS=Rattus norvegicus OX=10116 GN=Pcyt1a PE=1 SV=2	28	8	65	8	1	367	41.7	7.03	158.85	8	0	24044081.16	16156609.28	21336997.51	15802264.52	15265573.96	21296550.05	5708025.367	8793091.056	6564407.408	4224410.152	8660797.629	20317342.28	9044678.982	18983679.41	1	1	0.476444992	-0.321987234	0.005340307	2.272433776
Q91ZW1	Transcription factor A, mitochondrial OS=Rattus norvegicus OX=10116 GN=Tfam PE=2 SV=1	5	1	4	1	1	244	28.2	9.74	8.68	1	0	1705970.668	2576602.25	3158090.057	2016078.166	958632.4284	1650956.501	770593.0436	752821.7381	465492.4644	1288317.787	1119639.077	1344573.522	956906.272	2011055.012	1	1	0.475823021	-0.32255455	0.012133681	1.916007427
Q9EPB1	Dipeptidyl peptidase 2 OS=Rattus norvegicus OX=10116 GN=Dpp7 PE=1 SV=1	20	7	82	7	1	500	55.1	5.05	203.66	7	0	29820136.35	32536452.69	30982652.13	54366131.44	36444828.63	38206506	12332858.84	5220517.539	8171771.263	37206710.45	26400766.65	16450777.67	17630567.07	37059451.21	1	1	0.475737403	-0.322632703	0.010400831	1.98293196
B0BNL6	Arrestin domain-containing protein 1 OS=Rattus norvegicus OX=10116 GN=Arrdc1 PE=1 SV=1	12	5	13	5	1	434	46.1	7.02	26.24	5	0	3966411.819	5447054.063	5216980.15	5715292.281	4524209.868	5645277.884	446127.0208	874313.387	4845997.601	2049619.258	2878831.102	3410228.25	2417519.436	5085871.011	1	1	0.475340297	-0.322995367	0.004371321	2.359387301
D3ZSI8	Phosphatidylinositol 4-phosphate 5-kinase type-1 alpha OS=Rattus norvegicus OX=10116 GN=Pip5k1a PE=1 SV=1	4	1	5	1	1	546	60.6	8.57	13.8	1	0	318726.7154	440649.8125	325493.8576	NA	606819.588	407324.2653	NA	NA	173516.6211	NA	123446.3819	299643.2971	198868.7667	419802.8478	0.5	0.833333333	0.473719432	-0.3244788	0.032087075	1.493669871
Q9WVK7	Hydroxyacyl-coenzyme A dehydrogenase, mitochondrial OS=Rattus norvegicus OX=10116 GN=Hadh PE=2 SV=1	30	9	89	9	1	314	34.4	8.76	186.18	9	0	42178801.09	55192603.05	80085386.82	86049323.3	58706046.88	67027296.79	24493821.99	68982181.51	15645868.53	28028331.4	20246956.88	26956536.79	30725616.18	64873242.99	1	1	0.473625408	-0.324565008	0.007875445	2.103724897
Q6IN37	GM2 ganglioside activator OS=Rattus norvegicus OX=10116 GN=Gm2a PE=1 SV=1	25	4	57	4	1	199	21.5	6.52	124	4	0	30840680.17	31369754.78	40520178.02	56743776.82	27213036.11	54568885.44	19169909.9	19134382.12	5511638.881	31245844.74	26905349.19	12233107.15	19033372	40209385.22	1	1	0.473356454	-0.324811697	0.008367779	2.077389798
Q62931	Golgi SNAP receptor complex member 1 OS=Rattus norvegicus OX=10116 GN=Gosr1 PE=1 SV=1	11	3	19	3	1	250	28.5	9.29	35.5	3	0	3442653.771	2098314.625	1988836.062	1849995.997	1671536.166	2367424.811	828806.8606	1503983.035	NA	188874.4243	966901.5679	1800036.312	1057720.44	2236460.239	0.833333333	1	0.472943995	-0.325190284	0.01306388	1.883927818
P37397	Calponin-3 OS=Rattus norvegicus OX=10116 GN=Cnn3 PE=1 SV=1	33	8	67	7	1	330	36.4	5.72	174.62	8	1	28470528.19	27911932.84	15262439.51	19837788.43	24796787.12	16437416.58	16412626.25	2789607.17	8590190	9530698.512	10427814.59	14945140.8	10449346.22	22119482.11	1	1	0.472404651	-0.325685835	0.003538357	2.451198351
D3ZVB7	Osteoglycin OS=Rattus norvegicus OX=10116 GN=Ogn PE=1 SV=1	3	1	2	1	1	298	34	6.19	3.95	1	0	1367584.496	1504624.375	1805366.486	3315379.527	1024025.707	1465474.476	793693.2957	341004.4252	511701.5954	1819116.968	636586.8601	843941.409	824340.7589	1747075.844	1	1	0.471840282	-0.326204985	0.040642163	1.391023187
F1M6W2	Endoplasmic reticulum metallopeptidase 1 OS=Rattus norvegicus OX=10116 GN=Ermp1 PE=1 SV=1	13	11	131	11	1	898	99.9	7.49	281.34	11	0	63666464.94	51883366.19	84777940.01	91513901.86	74095061.83	82911297.12	38216554.27	22521381.53	37988814.46	35601739.64	40826542.15	36586561.96	35290265.67	74808005.33	1	1	0.471744508	-0.326293147	0.000133852	3.873375135
Q66H43	BLOC-1-related complex subunit 6 OS=Rattus norvegicus OX=10116 GN=Borcs6 PE=2 SV=2	6	2	5	2	1	360	37.8	5.2	10.19	2	0	4828474.974	3573755.625	4158988.084	4921304.441	4086767.954	4275584.482	2439133.776	1368580.28	2474511.114	1863809.858	2485513.035	1545971.144	2029586.534	4307479.26	1	1	0.47117732	-0.326815622	1.40E-05	4.853871964
Q6PCT8	Succinate dehydrogenase [ubiquinone] cytochrome b small subunit, mitochondrial OS=Rattus norvegicus OX=10116 GN=Sdhd PE=2 SV=1	11	2	23	2	1	159	17	9.29	30.51	2	0	6906004.598	7526981.938	15834630.38	12045485.6	9519573.224	8250167.502	1628913.04	6925440.813	2738470.543	8097176.979	5033570.257	3874887.967	4716409.933	10013807.21	1	1	0.470990687	-0.32698768	0.011307128	1.946647691
D3ZUY0	Retinol dehydrogenase 14 OS=Rattus norvegicus OX=10116 GN=Rdh14 PE=1 SV=1	16	4	13	4	1	334	36.2	8.09	32.92	4	0	2285016.467	3023922.734	2921345.93	2771329.261	2374078.039	2042502.865	1351105.485	1045615.947	660565.9044	1097676.587	1691443.19	1391194.777	1206266.982	2569699.216	1	1	0.469419524	-0.328438851	8.62E-05	4.064492734
B5DF01	Vps11 protein (Fragment) OS=Rattus norvegicus OX=10116 GN=Vps11 PE=2 SV=1	14	11	61	11	1	903	103.6	7.01	140.02	11	0	57025153.24	55270516.03	76720232.94	76682934.7	63835950.73	116567025.3	37373618.21	8462643.684	34180355.32	14569659.68	63262950.08	51290926.04	34856692.17	74350302.16	1	1	0.468817088	-0.328996567	0.010594262	1.974929291
D3ZMI6	Olfactomedin 4 OS=Rattus norvegicus OX=10116 GN=Olfm4 PE=4 SV=1	16	7	44	7	1	511	57.9	5.87	98.12	7	0	8394048.464	7412358.094	10929507.95	14955099.88	7466969.773	10878234.85	930170.2351	714263.5904	6562408.376	6260706.485	7450383.028	6227560.592	4690915.384	10006036.5	1	1	0.468808542	-0.329004484	0.01111226	1.954197606
P42893	Endothelin-converting enzyme 1 OS=Rattus norvegicus OX=10116 GN=Ece1 PE=1 SV=2	24	15	139	15	1	762	86.1	6.8	349.9	15	0	53830264.2	61438586.35	49116386.88	34320308.17	56267301.24	56774479.23	18625481.24	11591540.11	31904255.64	27553818.43	28316374.84	28076182.18	24344608.74	51957887.68	1	1	0.468545005	-0.329248688	0.00024947	3.602981673
P0C643	RAS guanyl-releasing protein 2 OS=Rattus norvegicus OX=10116 GN=Rasgrp2 PE=1 SV=1	4	2	2	2	1	608	69.2	7.68	5.73	2	0	468578.648	629095.125	549660.5659	559380.5058	202700.7502	524643.8633	NA	NA	NA	284252.22	94691.83662	308003.4042	228982.4869	489009.9097	0.5	1	0.468257355	-0.329515392	0.035051274	1.455296192
P19511	ATP synthase F(0) complex subunit B1, mitochondrial OS=Rattus norvegicus OX=10116 GN=Atp5pb PE=1 SV=1	34	11	162	11	1	256	28.9	9.36	408.92	11	0	248758345	264460873.6	650813919.1	500868209.5	286795274.2	339335136.8	106198699.7	237851463.3	108342492.2	234878301	224518175.2	159567103.9	178559372.6	381838626.4	1	1	0.46763046	-0.330097208	0.016038356	1.794840151
Q5PQN7	Protein LZIC OS=Rattus norvegicus OX=10116 GN=Lzic PE=2 SV=1	10	2	11	2	1	190	21.4	4.96	20.91	2	0	3863230.246	3721977.375	5812131.8	4890423.374	3781255.712	4652285.901	1852559.896	843372.2911	2395102.028	3787362.22	2553581.561	1058769.288	2081791.214	4453550.735	1	1	0.467445267	-0.330269233	0.001648117	2.783011961
Q6PEC5	Uncharacterized protein (Fragment) OS=Rattus norvegicus OX=10116 PE=2 SV=1	31	4	64	4	1	163	17.1	9.01	179.34	4	0	21685073.34	52880965.5	77024327.84	71090070.47	47201212.31	40898023.91	29515259.27	49544697.84	8803822.131	13515947.17	19575131.39	23698545.72	24108900.59	51796612.23	1	1	0.465453232	-0.33212395	0.021419513	1.669190408
Q9R1T3	Cathepsin Z OS=Rattus norvegicus OX=10116 GN=Ctsz PE=1 SV=2	28	7	141	7	1	306	34.2	7.15	363.93	7	0	77016876.59	92043600.06	108525437.4	118367813.2	93421084.39	129497277.8	31996244.14	32013214.07	24299904.45	95390319.59	71150546.51	33128261.79	47996415.09	103145348.2	1	1	0.465327966	-0.332240846	0.002857432	2.544024096
D3ZY96	Neutrophilic granule protein OS=Rattus norvegicus OX=10116 GN=Ngp PE=1 SV=1	48	9	161	9	1	168	19.4	8.02	432.41	9	0	174589481.4	251974523.4	301408438.8	218064568.4	290315139.5	240835335.1	31999954.68	NA	77826182.47	126047495.6	121392700.3	215419294.3	114537125.4	246197914.4	0.833333333	1	0.465223784	-0.332338091	0.004228643	2.373798978
A0A0A0MXU8	Caveolin OS=Rattus norvegicus OX=10116 GN=Cav2 PE=1 SV=1	48	6	136	6	1	162	18.2	5.64	352.2	6	0	108897193.4	152050081.6	88072955.66	88227724.99	177284205.2	135271360.3	33065958.22	455104.5096	73535322.36	70597895.48	67717723.9	103386467.6	58126412.01	124967253.5	1	1	0.465133148	-0.332422709	0.009382602	2.027676706
F1M392	LIM and calponin homology domains 1 OS=Rattus norvegicus OX=10116 GN=Limch1 PE=1 SV=2	41	34	218	34	1	1085	121.4	5.63	560.69	34	0	56001035.75	57760110.63	44600956.33	45727667	37288084.67	35346218.39	43479244.96	4602542.282	16633521.49	17891508.21	17591752.78	28508535.91	21451184.27	46120678.8	1	1	0.465109899	-0.332444417	0.003793235	2.420990251
Q6IN44	Pulmonary surfactant-associated protein B OS=Rattus norvegicus OX=10116 GN=Sftpb PE=2 SV=1	44	14	256	3	1	376	41.6	6.74	620.62	14	11	129901182	83899447.69	101628056.3	131385250.9	166372771.4	126505023.2	59984487.31	1435649.166	55575836.71	90065285.95	90086691.78	45273552.53	57070250.57	123281955.3	1	1	0.462924606	-0.334489734	0.003869002	2.412401046
Q5PQP4	Cdc42 effector protein 2 OS=Rattus norvegicus OX=10116 GN=Cdc42ep2 PE=1 SV=1	6	1	3	1	1	214	23	5.57	6.52	1	0	605602.5191	500361.6875	NA	502577.2291	523549.5253	409909.4115	NA	234477.4599	170712.7373	166229.6934	NA	369351.154	235192.7611	508400.0745	0.666666667	0.833333333	0.462613546	-0.334781655	0.001560088	2.806850904
Q5BK62	Protein Mpv17 OS=Rattus norvegicus OX=10116 GN=Mpv17 PE=2 SV=1	11	2	17	2	1	176	19.6	9.47	37.4	2	0	4320916.335	4384961.875	8684297.744	6374242.421	3960939.142	4301301.201	653150.8677	2851865.609	786458.832	3904181.039	4407920.493	2102632.008	2451034.808	5337776.453	1	1	0.459186485	-0.338010903	0.015419464	1.811930723
T2CB11	Tyrosine-protein kinase receptor OS=Rattus norvegicus OX=10116 GN=Insr PE=1 SV=1	4	4	11	4	1	1384	156.8	5.97	25.52	4	0	2589317.307	1552045.25	2308678.515	1836189.357	543210.1592	2022718.219	373967.9224	834763.9084	2232116.162	361021.9164	459798.5443	711136.8479	828800.8836	1808693.134	1	1	0.458231896	-0.338914684	0.039120433	1.407596347
A0A0G2JW59	Fms-related tyrosine kinase 3 OS=Rattus norvegicus OX=10116 GN=Flt3 PE=3 SV=1	2	2	18	1	1	1002	113.7	6.61	20.24	2	0	963627.591	1102782.25	1027226.526	631251.8088	1156063.756	1130407.419	NA	105863.4116	616750.743	496582.1513	602914.5259	468790.4178	458180.2499	1001893.225	0.833333333	1	0.457314451	-0.339785075	0.001535334	2.813797133
D3Z979	alpha-1,2-Mannosidase OS=Rattus norvegicus OX=10116 GN=Man1c1 PE=1 SV=2	4	2	10	2	1	625	70.6	7.03	24.24	2	0	36297237.3	30922973.5	32002844.22	30501091.14	36430003.62	36384410.89	16695432.01	NA	24672013.88	11669744.95	13848007.01	10289657.35	15434971.04	33756426.78	0.833333333	1	0.457245405	-0.33985065	6.95E-05	4.158015195
D3ZTW9	Endonuclease G-like 1 (Predicted), isoform CRA_d OS=Rattus norvegicus OX=10116 GN=Exog PE=1 SV=1	20	5	13	5	1	368	41.3	8.72	31.33	5	0	1986851.746	1560024.711	3738507.61	3264741.352	2709789.794	3070323.039	1566608.047	NA	745259.6396	58803.82476	1651941.721	2198289.816	1244180.61	2721706.375	0.833333333	1	0.457132563	-0.339957841	0.016329424	1.787029134
F1LP26	Shroom family member 3 OS=Rattus norvegicus OX=10116 GN=Shroom3 PE=1 SV=3	2	3	14	3	1	1987	216	7.77	39.47	3	0	586333.7707	450468.0156	766478.1631	905724.649	225504.9734	472103.5798	194141.9412	19134.3675	274954.5041	393061.4137	225989.9086	449368.0398	259441.6958	567768.8586	1	1	0.4569495	-0.340131794	0.025035363	1.601446107
B1WBS4	Similar to Vacuolar protein sorting 26 homolog (VPS26 protein homolog), isoform CRA_a OS=Rattus norvegicus OX=10116 GN=Vps26b PE=1 SV=1	32	9	110	9	1	336	39.1	7.37	278.35	9	0	55558931.04	37123274.63	42303548.49	37030813.71	54833180.99	33772677.51	23108622.32	7882651.641	22125229.83	19877514.96	12212238.23	33288027.75	19749047.45	43437071.06	1	1	0.45465882	-0.34231438	0.001236104	2.907944988
A0A0G2KAM3	Pyruvate dehydrogenase E1 component subunit beta, mitochondrial OS=Rattus norvegicus OX=10116 GN=Pdhb PE=1 SV=1	28	10	168	10	1	423	46.2	8.41	424.75	10	0	62246635.06	83097520.56	114505173.8	111980231.9	85447503.59	73868832.46	34278895.21	30167743.7	22817972.16	68702709.75	46592714.34	38087930.22	40107994.23	88524316.24	1	1	0.453073189	-0.343831637	0.001134112	2.945344054
Q5EAP4	G protein subunit alpha 14 OS=Rattus norvegicus OX=10116 GN=Gna14 PE=2 SV=1	25	8	102	5	1	355	41.4	6.3	229.48	8	0	2132639.88	3233112.938	2526259.383	1489374.621	1394526.748	3292889.414	696048.5726	NA	1602254.163	505314.1235	469763.5503	2037438.312	1062163.744	2344800.497	0.833333333	1	0.45298683	-0.343914424	0.023420421	1.630405302
D3ZEG8	Translocase of inner mitochondrial membrane 29 OS=Rattus norvegicus OX=10116 GN=Timm29 PE=1 SV=1	16	3	11	3	1	267	29.9	8.03	26.85	3	0	254227.4189	919864.7969	1266803.181	913489.9624	1163710.09	699554.5635	171658.5242	573621.9573	NA	239474.3055	825641.0682	158584.6071	393796.0925	869608.3353	0.833333333	1	0.452843052	-0.344052291	0.043088443	1.365639199
A0A0G2JZ40	RCG54895, isoform CRA_a OS=Rattus norvegicus OX=10116 GN=Reck PE=4 SV=1	22	17	86	17	1	972	105.9	6.84	199.77	17	0	27416572.82	29495374.62	27199514.43	22268152.74	25963775.34	36958885.18	13179692.31	7320985.882	15207326.68	8613145.506	10532952.79	21777222.99	12771887.69	28217045.85	1	1	0.452630221	-0.344256453	0.000372092	3.429349667
Q62867	Gamma-glutamyl hydrolase OS=Rattus norvegicus OX=10116 GN=Ggh PE=1 SV=1	7	2	10	2	1	317	35.8	8.05	25.39	2	0	836655.6503	1135581.883	1262045.026	1173457.633	1465485.971	1287722.852	556331.9388	301599.6906	801444.7397	339147.7013	392422.935	847984.2052	539821.8684	1193491.503	1	1	0.452304744	-0.344568857	0.000493525	3.306690843
F1LMV9	Coronin OS=Rattus norvegicus OX=10116 GN=Coro2b PE=3 SV=3	3	1	2	1	1	480	54.9	8.27	5.75	1	0	883596.1857	691436.4375	667817.3267	NA	639052.2721	419652.5783	NA	NA	NA	NA	320628.2204	276115.7051	298371.9627	660310.9601	0.333333333	0.833333333	0.451865834	-0.344990495	0.03326775	1.477976571
A1A5P0	Cdc42 effector protein 1 OS=Rattus norvegicus OX=10116 GN=Cdc42ep1 PE=1 SV=1	25	7	53	7	1	388	41	7.36	126.18	7	0	13274120.59	8192009.625	10565900.81	8684176.6	10973062.95	8733130.696	12084053.64	1220700.552	2698091.266	2947162.685	3276767.212	4992062.884	4536473.041	10070400.21	1	1	0.450475944	-0.346328396	0.010825971	1.965533141
F1M7E5	Cadherin 5 OS=Rattus norvegicus OX=10116 GN=Cdh5 PE=1 SV=2	16	11	95	11	1	776	87.1	5.31	215.98	11	0	47682653.82	48398178.59	43102254.42	42412947.75	50047505.13	44641212.12	30567919.08	4901915.587	16678170.63	26245811.74	18577696.49	27357804.87	20721553.07	46047458.64	1	1	0.450004271	-0.346783364	9.36E-05	4.028724151
D4A4Q4	OCIA domain-containing 2 OS=Rattus norvegicus OX=10116 GN=Ociad2 PE=1 SV=3	20	3	15	3	1	132	14.7	9.77	16.62	3	0	4477066.782	5338243.313	9550130.698	5996923.143	4666031.185	4624726.743	675196.2487	1652722.249	1025348.337	3407355.022	5857527.475	2973137.068	2598547.733	5775520.311	1	1	0.449924439	-0.346860416	0.017176607	1.765062621
Q3S4A4	ADP-ribosylation factor GTPase activating protein 1 heart isoform OS=Rattus norvegicus OX=10116 GN=Arfgap1 PE=1 SV=1	20	5	30	5	1	425	46.7	5.57	78.63	5	0	3578230.558	2697221.844	3395115.943	1638210.453	2277645.576	3149598.009	2397491.088	544454.8106	1336862.196	608929.1221	499606.3455	2131994.68	1253223.04	2789337.064	1	1	0.449290642	-0.347472627	0.007301864	2.13656626
Q5XFX0	Transgelin-2 OS=Rattus norvegicus OX=10116 GN=Tagln2 PE=1 SV=1	76	15	242	13	1	199	22.4	8.25	624.14	15	2	208294761.7	239165876.8	233022696.8	241327016.7	236097279.8	194657302	162573605.2	14303549.14	100771313.8	96782769.9	109663878.6	123442269.8	101256231.1	225427489	1	1	0.449174285	-0.347585115	0.000173306	3.761186401
D4A6C4	Ras and Rab interactor 2 OS=Rattus norvegicus OX=10116 GN=Rin2 PE=1 SV=1	1	1	6	1	1	902	101.3	6.73	13.29	1	0	1150566.66	1391520.969	2768385.259	2049677.307	1488881.248	2012664.083	528844.7395	NA	943233.6025	204053.4633	1064761.009	1310310.977	810240.7583	1810282.588	0.833333333	1	0.447576949	-0.349132288	0.01216636	1.914839337
Q5BJM5	Pleckstrin homology domain-containing family O member 1 OS=Rattus norvegicus OX=10116 GN=Plekho1 PE=1 SV=1	4	1	3	1	1	408	46	9.07	8.63	1	0	188456.6645	130810.3828	196129.3334	150428.2541	98461.71105	256893.8408	NA	71810.01257	106205.7524	NA	50464.74567	NA	76160.17022	170196.6978	0.5	1	0.447483243	-0.349223223	0.031381709	1.503323409
D3ZFX1	Similar to Expressed sequence AW547186 (Predicted), isoform CRA_a OS=Rattus norvegicus OX=10116 GN=Tmem164 PE=4 SV=1	5	1	26	1	1	296	33.4	8.16	63.68	1	0	2001024.227	2096032.063	3523559.76	2004401.992	4322367.936	3222068.026	NA	NA	244921.7006	1088646.712	1971132.541	1810000.402	1278675.339	2861575.667	0.666666667	1	0.446843099	-0.349844945	0.027340008	1.563201363
P05964	Protein S100-A6 OS=Rattus norvegicus OX=10116 GN=S100a6 PE=1 SV=3	44	5	52	5	1	89	10	5.48	88.9	5	0	663859264	773560809.9	792919055.9	668788450.9	889463801.8	928308866.9	598304172.2	15127196.11	389697854.5	213942540	534911192.9	340179042	348693666.3	786150041.6	1	1	0.443545949	-0.353061383	0.001206829	2.918354262
F7FJQ3	NPC intracellular cholesterol transporter 2 OS=Rattus norvegicus OX=10116 GN=Npc2 PE=1 SV=1	32	5	68	5	1	152	16.7	7.93	199.76	5	0	163849066	103169240.3	182235319.2	218833243.6	128375336.1	260531202.3	67185306.64	18229841.61	39877653.87	217908655.7	94390001.46	30778552.12	78061668.56	176165567.9	1	1	0.443115357	-0.353483198	0.028228732	1.549308629
Q675A5	Group XV phospholipase A2 OS=Rattus norvegicus OX=10116 GN=Pla2g15 PE=1 SV=1	9	3	19	3	1	413	47.4	6.1	28.59	3	0	2236919.295	3952629.531	3913723.722	5152835.642	2960846.592	3304004.039	370542.873	3144049.014	543970.1451	2461861.25	1968209.051	1042630.369	1588543.784	3586826.47	1	1	0.442882809	-0.353711177	0.008395208	2.075968539
D3ZA93	Acyl-CoA thioesterase 13 OS=Rattus norvegicus OX=10116 GN=Acot13 PE=1 SV=1	7	1	4	1	1	140	15.3	8.84	8.61	1	0	1486465.159	2215347.25	2912800.909	4668126.736	2214085.351	3222181.432	695229.9019	2699912.456	889986.5892	1378858.65	1009804.688	703473.7803	1229544.344	2786501.14	1	1	0.441250257	-0.355315029	0.017471998	1.757657429
Q3LUD3	Nedd4 binding protein 3 OS=Rattus norvegicus OX=10116 GN=N4bp3 PE=2 SV=1	2	1	3	1	1	537	60	8.1	7.11	1	0	770181.248	528337.8125	1320605.506	712617.0856	907689.181	402521.3716	290812.0573	426679.278	297467.3249	NA	347144.13	NA	340525.6976	773658.7008	0.666666667	1	0.440149768	-0.356399523	0.031345973	1.503818245
D4A4H5	Stromal cell derived factor 2 (Predicted), isoform CRA_b OS=Rattus norvegicus OX=10116 GN=Sdf2 PE=1 SV=2	28	3	14	3	1	219	24	7.93	31.71	3	0	1287840.691	1946433.563	2422042.02	2278891.946	2839439.432	790874.1287	1094369.115	1279806.79	547013.7333	326155.0644	NA	987838.1125	847036.563	1927586.963	0.833333333	1	0.439428456	-0.357111823	0.019119303	1.718527944
Q5RJY4	Dehydrogenase/reductase SDR family member 7B OS=Rattus norvegicus OX=10116 GN=Dhrs7b PE=1 SV=1	21	5	36	5	1	325	35.3	9.55	99.5	5	0	12458285.33	13060795.09	13759044.46	12263209.29	14035314.29	13213596.84	5089960.864	4720409.755	2639969.786	2718236.519	8932698.31	10440548.53	5756970.626	13131707.55	1	1	0.438402287	-0.358127189	0.000280625	3.551873642
A0A387KC71	Aldo-keto reductase family 1, member C15 OS=Rattus norvegicus OX=10116 GN=17beta-HSD PE=2 SV=1	39	11	185	10	1	324	37.2	7.46	463.3	11	1	139713735.2	125924704.9	66762506.57	83770124.17	167261055.1	108414624	54515570.13	34423439.25	79961778.22	20905468.73	49581410.29	63598907.85	50497762.41	115307791.7	1	1	0.437938856	-0.35858652	0.003831361	2.416646926
F1LPG3	Phosphofurin acidic cluster sorting protein 1 OS=Rattus norvegicus OX=10116 GN=Pacs1 PE=1 SV=1	7	5	6	5	1	961	104.7	7.55	14.01	5	0	1805591.53	2799653.344	1581156.122	1965214.134	2020314.17	1727366.598	2051156.528	NA	235078.8771	258852.3268	666833.256	1119666.302	866317.458	1983215.983	0.833333333	1	0.436824564	-0.359692948	0.01288284	1.889988387
Q5U2X8	Acyl-CoA thioesterase 9 OS=Rattus norvegicus OX=10116 GN=Acot9 PE=1 SV=1	34	14	107	14	1	439	50.4	8.63	214.02	14	0	33304572.8	51216239.09	79922540.13	69485381.34	65055463.08	47914285.15	28577049.91	2222492.141	21167181.64	30697339.74	40219102.5	28496299.81	25229910.96	57816413.6	1	1	0.43637973	-0.360135431	0.003664626	2.435970341
G3V936	Citrate synthase OS=Rattus norvegicus OX=10116 GN=Cs PE=1 SV=1	27	13	222	13	1	466	51.8	8.41	382.94	13	0	159473010.9	229282259.6	304817033.5	380386776.8	251668140.2	237700214.3	130180947	50191746.67	58228775.42	216830907.2	121299570	103657133.7	113398180	260554572.6	1	1	0.435218537	-0.361292615	0.00380767	2.419340698
M0RAK0	Proline and serine-rich 2 OS=Rattus norvegicus OX=10116 GN=Proser2 PE=1 SV=1	7	2	4	2	1	471	50.5	6.35	8.71	2	0	181333.3413	291146.2813	314377.772	291958.5458	327955.5283	227469.213	155116.6308	NA	100150.3627	NA	NA	100009.6567	118425.5501	272373.4469	0.5	1	0.434791098	-0.361719356	0.003550346	2.449729321
Q811A2	Bone marrow stromal antigen 2 OS=Rattus norvegicus OX=10116 GN=Bst2 PE=1 SV=1	17	3	33	3	1	172	19.7	8.19	75.64	3	0	43361813.7	52589356.84	45445844.18	44421946.29	52217138.17	51764867.88	30135677.64	8879640.971	14022442.78	12367871.76	23776542.11	36714857.23	20982838.75	48300161.18	1	1	0.434425854	-0.362084336	0.000212752	3.672126349
B0BNJ8	H2-T24 protein OS=Rattus norvegicus OX=10116 GN=H2-T24 PE=2 SV=1	5	2	8	1	1	349	40	5.91	17.49	2	0	425745.822	479945.5938	253326.6456	256521.9544	441286.2813	404928.2524	81537.09488	NA	188115.2604	179938.4792	120978.1602	246786.9077	163471.1805	376959.0916	0.833333333	1	0.433657615	-0.362853023	0.002377044	2.623962779
D3ZJK8	Uncharacterized protein OS=Rattus norvegicus OX=10116 PE=1 SV=3	28	3	38	3	1	106	12.1	6.02	51.35	3	0	11125120.14	16907600.56	28065046.65	13403072.25	15965658.67	17910213.68	5797851.524	1455680.687	6455986.978	7027164.946	14434942.16	9601050.662	7462112.825	17229451.99	1	1	0.433102157	-0.363409653	0.008176582	2.087428204
D3ZE59	Transmembrane protein 115 OS=Rattus norvegicus OX=10116 GN=Tmem115 PE=1 SV=1	5	1	4	1	1	350	38	7.85	6.96	1	0	581685.755	464533.3438	987767.0945	741017.0419	NA	924965.8412	NA	310766.4517	NA	233344.1186	NA	414741.4661	319617.3455	739993.8153	0.5	0.833333333	0.431918942	-0.364597749	0.02238933	1.649958902
P41350	Caveolin-1 OS=Rattus norvegicus OX=10116 GN=Cav1 PE=1 SV=3	57	10	169	10	1	178	20.5	5.53	390.65	10	0	531817964.4	652624613.5	449980216.4	422426170.7	596879673.9	548968677.8	309513549.7	7749929.068	267283402.3	216934318.4	253102376	328457104.5	230506780	533782886.1	1	1	0.431836213	-0.364680941	0.000450815	3.346001642
Q6P9U0	Serine (Or cysteine) peptidase inhibitor, clade B, member 6a OS=Rattus norvegicus OX=10116 GN=Serpinb6a PE=1 SV=1	26	8	66	8	1	379	43	6.1	161.66	8	0	36326054.24	40291728.38	31722455.1	38595455.91	47144893.1	30297489.29	17312117.49	1034515.368	20000861.52	19851276.95	19194929.45	19095120.17	16081470.16	37396346	1	1	0.430027847	-0.36650342	0.000295175	3.529920428
P19643	Amine oxidase [flavin-containing] B OS=Rattus norvegicus OX=10116 GN=Maob PE=1 SV=3	47	21	264	18	1	520	58.4	8.21	632.31	21	3	183017647	260129497.9	304121323.6	272561291.3	294999591.5	254955349.1	63181160.98	312972104.9	38366508.38	75216051.86	113523049	70785969.69	112340807.5	261630783.4	1	1	0.42938681	-0.3671513	0.007694933	2.113795157
O55158	Tetraspanin OS=Rattus norvegicus OX=10116 GN=Tspan8 PE=2 SV=2	30	7	125	7	1	235	25.5	5.67	273.09	7	0	277075737.6	256684858.4	272805536.4	183123905.6	202612208.1	319437336.3	135498593.2	1983940.96	173094173.1	105014066.9	72688963.73	157959549.6	107706547.9	251956597.1	1	1	0.427480563	-0.369083627	0.001415291	2.849154255
A0A0H2UHI8	Pulmonary surfactant-associated protein C OS=Rattus norvegicus OX=10116 GN=Sftpc PE=4 SV=1	30	4	108	4	1	215	23.9	7.85	317.58	4	0	137871220.3	133705342.2	203778927.1	195970176.6	152079795.1	161639632	34736581.38	4659125.953	38849440.36	81737667.61	172820097	88128462.04	70155229.06	164174182.2	1	1	0.427321934	-0.369244815	0.005902721	2.228947744
P18910	Atrial natriuretic peptide receptor 1 OS=Rattus norvegicus OX=10116 GN=Npr1 PE=1 SV=1	5	5	14	4	1	1057	118.9	7.03	26.73	5	1	2437131.402	3147535.063	1695400.877	2475635.09	2224099.957	2521890.057	1185542.307	70283.87015	1232882.52	66538.90827	1284800.458	2355427.149	1032579.202	2416948.741	1	1	0.427224287	-0.369344066	0.006272109	2.202586403
A0A0G2K543	C2 calcium-dependent domain-containing 5 OS=Rattus norvegicus OX=10116 GN=C2cd5 PE=1 SV=1	3	3	7	3	1	1082	118.9	6.33	16.04	3	0	1684225.061	993849.2969	3267665.394	3130295.135	1147319.991	2600489.214	1206682.079	629068.0514	2053789.418	281227.0726	1002634.021	278333.5302	908622.3619	2137307.349	1	1	0.425124801	-0.371483558	0.03147334	1.502057167
B2RYW3	NADH dehydrogenase (Ubiquinone) 1 beta subcomplex, 9 OS=Rattus norvegicus OX=10116 GN=Ndufb9 PE=1 SV=1	29	4	40	4	1	179	21.9	8.07	84.81	4	0	16632052.41	19582103.97	31981978.73	20976854.63	15349224.07	16229946.72	5474754.658	14216471.1	5661413.911	5925858.924	12534958.79	7496439.829	8551649.536	20125360.09	1	1	0.424919082	-0.371693765	0.00300997	2.521437833
Q0R3X4	GIMAP4 OS=Rattus norvegicus OX=10116 GN=Gimap4 PE=1 SV=1	36	10	79	10	1	328	38	6.33	199.37	10	0	40359457.01	39491126.23	27445107.76	33756639.15	43104701.9	30357366.04	26205363.52	1580964.579	19370668.79	13640551.78	10277968.53	19859603.31	15155853.42	35752399.68	1	1	0.423911501	-0.372724801	0.000778511	3.108735247
Q63772	Growth arrest-specific protein 6 OS=Rattus norvegicus OX=10116 GN=Gas6 PE=1 SV=1	9	5	19	5	1	674	74.6	5.91	48.01	5	0	940012.1249	2487599.594	3529667.437	2796145.027	2381192.303	2929152.384	562077.2679	134805.8815	1071249.672	1270598.139	1359825.732	1976488.707	1062507.566	2510628.145	1	1	0.423203878	-0.373450361	0.008327379	2.079491669
P24062	Insulin-like growth factor 1 receptor OS=Rattus norvegicus OX=10116 GN=Igf1r PE=2 SV=2	2	2	3	2	1	1370	155.3	5.78	7.02	2	0	1147955.05	1194441.289	863745.9275	891541.8448	944366.4844	1167348.538	273135.2024	NA	334044.6352	256798.6828	666535.5916	649081.8201	435919.1864	1034899.856	0.833333333	1	0.421218714	-0.375492342	0.000336785	3.47264726
P19234	NADH dehydrogenase [ubiquinone] flavoprotein 2, mitochondrial OS=Rattus norvegicus OX=10116 GN=Ndufv2 PE=1 SV=2	33	6	61	6	1	248	27.4	6.68	132.19	6	0	9396097.137	11583402.2	35804766.77	29956546.51	13288410.6	12749094.84	9263509.911	9873758.117	2473263.069	12344386.87	5705770.257	7566116.466	7871134.115	18796386.34	1	1	0.418757838	-0.378037051	0.04478031	1.348912904
Q4V8F9	Hydroxysteroid dehydrogenase-like protein 2 OS=Rattus norvegicus OX=10116 GN=Hsdl2 PE=2 SV=1	16	6	22	6	1	524	58.3	6.19	54.9	6	0	9265298.329	11171761.72	24919468.44	20942958.55	10206948.72	12699191.67	3980167.067	7267976.128	930234.9799	12847606.13	7302717.105	5002842.915	6221924.054	14867604.57	1	1	0.418488669	-0.378316296	0.01944096	1.711282293
Q32KK2	Arylsulfatase A OS=Rattus norvegicus OX=10116 GN=Arsa PE=1 SV=1	7	2	5	2	1	507	53.7	5.57	11.96	2	0	1399322.842	1267374.219	1621549.866	2159750.609	1700338.392	1472940.756	NA	NA	355888.9496	984915.961	NA	NA	670402.4553	1603546.114	0.333333333	1	0.418074946	-0.378745858	0.014979924	1.82449039
D3ZW62	Thrombospondin type 1 domain-containing 1 OS=Rattus norvegicus OX=10116 GN=Thsd1 PE=1 SV=1	3	2	4	2	1	850	94.4	8.32	7.27	2	0	1757001.438	2126719.375	1736029.32	2056970.696	2307791.742	1793662.202	1416161.07	NA	350622.524	543329.9942	647875.8658	1137905.984	819179.0876	1963029.129	0.833333333	1	0.417303582	-0.379547887	0.000378206	3.422271586
Q5RKI8	ATP-binding cassette sub-family B member 8, mitochondrial OS=Rattus norvegicus OX=10116 GN=Abcb8 PE=2 SV=1	8	5	9	5	1	714	77.7	9.52	18.05	5	0	1953466.926	2942474.25	4904424.688	3229901.576	2026332.551	3312677.141	898948.5667	489678.5853	415580.649	1854204.781	1888169.179	2099395.921	1274329.614	3061546.189	1	1	0.416237265	-0.380659041	0.007736299	2.111466754
Q5PQK5	Radixin OS=Rattus norvegicus OX=10116 GN=Rdx PE=2 SV=1	47	34	680	20	1	583	68.5	6.27	1647.19	34	0	194459846.4	237538370.3	257589048.2	202482823.1	175435119.2	193683907.7	154733867.9	80069913.2	65628131.16	50028097.71	65785676.46	108595961.9	87473608.05	210198185.8	1	1	0.416148254	-0.380751923	0.000116212	3.934749025
Q9ER33	Cyclic nucleotide gated channel alpha 3, isoform CRA_a OS=Rattus norvegicus OX=10116 GN=Cnga3 PE=2 SV=1	2	1	1	1	1	670	76.4	7.28	1.66	1	0	209102.2045	175297.75	NA	234604.4314	221130.7043	181010.6435	97994.57454	NA	NA	NA	NA	71882.63474	84938.60464	204229.1467	0.333333333	0.833333333	0.415898543	-0.381012601	0.0020346	2.69152096
Q62713	Neutrophil antibiotic peptide NP-3A OS=Rattus norvegicus OX=10116 PE=1 SV=1	11	1	9	1	1	87	9.3	7.65	20.84	1	0	12227716.65	13807872	19070602.63	14289860.94	20200921.4	19162218.06	10932130.39	3673506.274	5988627.514	7666955.331	6716124.944	6067894.912	6840873.227	16459865.28	1	1	0.415609308	-0.381314735	0.000208727	3.680421369
O08775	Vascular endothelial growth factor receptor 2 OS=Rattus norvegicus OX=10116 GN=Kdr PE=1 SV=1	10	13	57	12	1	1343	150.3	6.37	111.84	13	0	9811766.592	11095886.27	13037831.64	11799442.04	10821242.42	12670479.73	5050416.827	3993964.549	5211354.803	4919752.056	3651095.807	5939561.384	4794357.571	11539441.45	1	1	0.415475705	-0.381454367	5.39E-07	6.268411235
P14604	Enoyl-CoA hydratase, mitochondrial OS=Rattus norvegicus OX=10116 GN=Echs1 PE=1 SV=1	45	10	139	10	1	290	31.5	8.13	340.18	10	0	74962550.58	94286809.63	112470312.7	163920706	108355177.3	84227895.37	40293947.49	94382182.78	16674689.52	53401892.65	29390426.31	30868972.62	44168685.23	106370575.3	1	1	0.415234054	-0.381707037	0.004518652	2.344991104
D3ZCI5	Syntaxin-binding protein 6 OS=Rattus norvegicus OX=10116 GN=Stxbp6 PE=1 SV=2	10	2	10	2	1	210	23.7	9.19	25.7	2	0	4047949.95	4804029.688	3196331.219	3267483.708	7903888.172	3986936.204	447066.9788	NA	1550472.733	960835.3535	2918734.999	3495529.554	1874527.924	4534436.49	0.833333333	1	0.413398209	-0.383631409	0.020505053	1.688139104
Q6PCU0	ATP synthase subunit gamma OS=Rattus norvegicus OX=10116 GN=Atp5f1c PE=1 SV=1	35	11	164	11	1	298	33	9.01	351.48	11	0	186139538.3	164410755	399547133.1	300493850.6	145445126.7	164503407.4	102301184.1	140948481.1	53813062.11	124542096.2	69151891.7	70903998.13	93610118.88	226756635.2	1	1	0.412821961	-0.384237207	0.012316818	1.909501476
Q71KM5	CRAMP (Fragment) OS=Rattus norvegicus OX=10116 PE=2 SV=1	43	5	108	5	1	171	19.3	8.43	302.97	5	0	69663091.6	79628146.63	93267762.9	77471979.4	117566524.2	72370159.16	13174382.56	150171.4711	26485468.67	54937868.15	29946659.14	85537631.24	35038696.87	84994610.66	1	1	0.412246101	-0.384843443	0.006397806	2.193968933
F1LSB2	Angiopoietin 1, isoform CRA_a OS=Rattus norvegicus OX=10116 GN=Angpt1 PE=4 SV=2	9	4	11	4	1	497	57.4	6.73	24.71	4	0	4274121.844	4336444.406	3834635.67	7020965.904	7788930.646	11816654.26	1495191.663	NA	5040336.489	2067001.215	1772771.422	3043090.918	2683678.341	6511958.788	0.833333333	1	0.412115376	-0.384981182	0.03110265	1.507202607
P70500	CDP-diacylglycerol--inositol 3-phosphatidyltransferase OS=Rattus norvegicus OX=10116 GN=Cdipt PE=1 SV=1	27	5	26	5	1	213	23.6	8.27	64.24	5	0	19938391.38	22740576.97	34840778.24	21076331	27775119.71	25803210.86	4486098.084	5033403.877	9105125.496	12537388.22	14354537.24	17022811.34	10423227.38	25362401.36	1	1	0.410971628	-0.386188159	0.000632766	3.198756865
B2RYW8	MICOS complex subunit Mic10 OS=Rattus norvegicus OX=10116 GN=Minos1 PE=3 SV=1	11	1	6	1	1	76	8.5	9.25	11.11	1	0	4525940.308	7079677.5	14984327.29	6095178.448	4755040.233	6695970.097	1590604.094	2396109.921	2114193.714	6629139.132	3599429.618	1699289.867	3004794.391	7356022.313	1	1	0.40848087	-0.388828278	0.03334901	1.476917054
Q99MC0	Protein phosphatase 1 regulatory subunit 14A OS=Rattus norvegicus OX=10116 GN=Ppp1r14a PE=1 SV=1	20	2	18	2	1	147	16.7	8.02	42.15	2	0	2372113.801	2320389.781	3427476.837	1781978.726	829114.7771	2933131.41	1862298.994	180530.3961	1649521.635	437982.3345	227744.2673	1214981.896	928843.2537	2277367.555	1	1	0.407858297	-0.389490698	0.018232719	1.739148561
D3ZR79	Transmembrane protein 245 OS=Rattus norvegicus OX=10116 GN=Tmem245 PE=1 SV=1	7	5	38	5	1	880	97.6	8.72	102.06	5	0	7758327.532	7927202.25	12309299.64	7790642.267	13371918.47	10898233.4	2916888.992	1503851.456	4561481.733	4842760.77	6601020.356	4065400.093	4081900.567	10009270.59	1	1	0.407811991	-0.389540009	0.000789577	3.102605511
O35370	Thrombomodulin OS=Rattus norvegicus OX=10116 GN=Thbd PE=1 SV=1	22	8	237	8	1	577	61.8	4.75	581.73	8	0	325613809.8	426610468.2	285126987.4	304484168.6	402883195.4	345066668.2	216964900	48808666.87	106693152.3	103208129.5	144190813.6	231426113.8	141881962.7	348297549.6	1	1	0.407358487	-0.390023231	0.00022435	3.649073926
D4A8Z2	Similar to fatty acid translocase/CD36 OS=Rattus norvegicus OX=10116 GN=RGD1565355 PE=3 SV=3	13	6	78	1	1	472	52.9	8.81	145.21	6	0	1916636.197	2333285.25	1461750.031	1086127.348	3575362.593	3608578.368	772140.1333	225195.2086	NA	NA	1593696.904	1190868.181	945475.1067	2330289.965	0.666666667	1	0.405732815	-0.391759866	0.046933366	1.328518298
Q5PPM8	Type 1 phosphatidylinositol 4,5-bisphosphate 4-phosphatase OS=Rattus norvegicus OX=10116 GN=Pip4p1 PE=1 SV=1	23	5	21	4	1	284	30	8.82	51.6	5	1	14319612.81	16761586.44	16905782.7	3269975.583	13325424.69	10875387.54	3689063.964	3059204.033	9204568.645	3612988.642	5583556.165	5451724.322	5100184.295	12576294.96	1	1	0.405539494	-0.391966845	0.008153454	2.088658375
F1LPJ1	Protein tyrosine phosphatase, receptor type, M OS=Rattus norvegicus OX=10116 GN=Ptprm PE=4 SV=2	7	9	27	9	1	1486	167.1	6.65	64.08	9	0	8909829.585	9285010.125	6145059.443	5107894.823	7716468.975	6673201.049	3063995.05	227430.9099	3911543.915	1159118.45	4757334.552	4633051.535	2958745.735	7306244	1	1	0.404961254	-0.392586527	0.001600754	2.795675404
Q3ZAV4	GIMAP9 OS=Rattus norvegicus OX=10116 GN=Gimap9 PE=2 SV=1	13	3	8	3	1	290	33.2	5.68	18.92	3	0	2309545.494	786725.8438	1544625.543	741281.4255	2431795.834	1040356.869	970026.176	34387.80383	874803.8177	526430.5415	514066.3119	638320.6468	593005.8829	1475721.835	1	1	0.401841234	-0.395945501	0.024903471	1.603740118
P50123	Glutamyl aminopeptidase OS=Rattus norvegicus OX=10116 GN=Enpep PE=1 SV=2	30	26	244	26	1	945	107.9	5.39	549.19	26	0	76334179.42	109532370	94399213.48	102150293.8	100004866	116229475.3	47770219.07	20716411.48	44378466.42	29823456.19	40327518.59	56257913.52	39878997.55	99775066.34	1	1	0.399689011	-0.398277792	1.47E-05	4.832682665
D3ZEJ2	Mitochondrial calcium uniporter regulator 1 OS=Rattus norvegicus OX=10116 GN=Mcur1 PE=1 SV=1	7	2	10	2	1	336	37.5	10.26	25.37	2	0	3203759.031	4298841.75	5228674.636	5329782.604	3199014.493	4378379.234	684678.5394	457534.5572	684708.0874	3497807.683	3687972.425	1219520.335	1705370.271	4273075.291	1	1	0.399096706	-0.398921857	0.004940483	2.306230591
O54698	Equilibrative nucleoside transporter 1 OS=Rattus norvegicus OX=10116 GN=Slc29a1 PE=1 SV=3	17	7	136	7	1	457	50	7.99	375.05	7	0	80370564.15	91577174.31	83857500.88	83035782.87	68501903.99	82703031.37	33497596.52	6303453.092	43665712.91	21353066.17	36242510.11	54222097.63	32547406.07	81674326.26	1	1	0.39850229	-0.399569179	6.72E-05	4.172630727
P56574	Isocitrate dehydrogenase [NADP], mitochondrial OS=Rattus norvegicus OX=10116 GN=Idh2 PE=1 SV=2	49	22	475	21	1	452	50.9	8.69	1095.54	22	1	336764512.8	543841277	617790567.8	826379981.2	519449300.3	453010370.4	217304396.6	168304848	127712183.9	281338775.5	273119512.1	238753843.2	217755593.2	549539334.9	1	1	0.39625115	-0.402029464	0.000955143	3.019931603
D4A987	Cdc42 GTPase-activating protein (Predicted) OS=Rattus norvegicus OX=10116 GN=Arhgap31 PE=1 SV=1	8	8	30	8	1	1428	155.4	5.57	76.89	8	0	5777000.064	4897300	5091739.983	5186512.682	5370958.544	4210289.869	4080997.743	572284.3615	553276.541	3927291.139	270229.0117	2691540.819	2015936.602	5088966.857	1	1	0.396138678	-0.402152752	0.002213274	2.654964818
A0A0G2JSL4	Tuberin OS=Rattus norvegicus OX=10116 GN=Tsc2 PE=1 SV=1	4	4	14	4	1	1809	201.1	7.18	33.78	4	0	NA	NA	2249226.38	1968695.574	2502017.651	3513833.512	NA	1820458.186	1045070.529	590082.1671	477179.9617	1131921.729	1012942.514	2558443.279	0.833333333	0.666666667	0.395921427	-0.402390994	0.006203813	2.207341301
Q32KJ6	N-acetylgalactosamine-6-sulfatase OS=Rattus norvegicus OX=10116 GN=Galns PE=1 SV=1	14	6	29	6	1	524	58.3	7.01	63.55	6	0	3871909.585	5950362.906	8065593.826	9776990.912	5943096.393	12483074.59	2834899.953	1810853.066	1676945.217	5718225.136	3906159.617	2295390.441	3040412.238	7681838.035	1	1	0.395792286	-0.402532674	0.008266521	2.082677227
A1L122	NEDD8-activating enzyme E1 regulatory subunit OS=Rattus norvegicus OX=10116 GN=Nae1 PE=2 SV=1	3	1	2	1	1	534	60.3	5.66	3.81	1	0	NA	988435.1875	NA	742765.785	1644681.434	884386.9944	543239.5907	81711.16115	819992.1696	236778.7306	NA	NA	420430.413	1065067.35	0.666666667	0.666666667	0.394745377	-0.403682947	0.046890398	1.328916081
B2GV75	D2hgdh protein OS=Rattus norvegicus OX=10116 GN=D2hgdh PE=2 SV=1	12	4	25	4	1	535	58.8	8.13	53.77	4	0	1097284.679	3489580.5	3062043.774	6277491.292	3839914.031	3201543.519	491979.8276	2295335.924	697607.0044	2160152.087	1746799.858	856003.6324	1374646.389	3494642.966	1	1	0.393358178	-0.405211816	0.018261037	1.738474564
A0A0G2JZH8	Dihydrolipoamide acetyltransferase component of pyruvate dehydrogenase complex OS=Rattus norvegicus OX=10116 GN=Pdhx PE=1 SV=1	12	5	55	5	1	502	54.1	8.75	146.27	5	0	6436197.782	8267386.422	23230362.4	15875033.54	10529889.76	8323424.644	6691268.911	2993932.507	2052346.154	6763053.18	5341022.196	4642692.109	4747385.843	12110382.43	1	1	0.392009573	-0.406703327	0.02163833	1.66477626
Q68FT1	Ubiquinone biosynthesis protein COQ9, mitochondrial OS=Rattus norvegicus OX=10116 GN=Coq9 PE=1 SV=2	21	5	12	5	1	312	35.1	5.77	21.95	5	0	4343683.495	7954980.039	15277849.78	16405739.49	9784188.381	8559133.048	3626752.848	12188522.01	891258.8362	2196471.646	3323340.219	2196377.805	4070453.894	10387595.71	1	1	0.391857174	-0.406872198	0.030929731	1.509623857
F7EZZ0	Death-associated protein 3 OS=Rattus norvegicus OX=10116 GN=Dap3 PE=1 SV=1	6	2	12	2	1	396	45.1	9.1	30.19	2	0	930854.3508	1348083.563	1881437.869	2125471.166	999005.2064	1357023.232	708793.4599	491129.5787	572350.152	765867.4585	NA	281927.8528	564013.7004	1440312.565	0.833333333	1	0.391591183	-0.407167095	0.003986569	2.399400715
B0LT89	Serine/threonine-protein kinase 24 OS=Rattus norvegicus OX=10116 GN=Stk24 PE=2 SV=1	37	16	92	7	1	431	48	5.43	190.34	16	8	47968385.08	53405589.72	34058139.37	40669729.14	50250973.94	43549634.72	22417397.34	3100751.351	19821189.16	14438696.54	19765080.95	25948885.37	17582000.12	44983741.99	1	1	0.390852324	-0.407987301	9.09E-05	4.041436117
M0RCJ4	Endothelial cell surface-expressed chemotaxis and apoptosis regulator OS=Rattus norvegicus OX=10116 GN=Ecscr PE=1 SV=2	15	2	6	2	1	224	23.6	7.34	15.53	2	0	1553807.301	1507604.25	2262536.379	1688001.31	2338562.644	1841827.771	NA	NA	532366.2457	NA	350432.6913	1303547.249	728782.0621	1865389.943	0.5	1	0.390686175	-0.408171957	0.005431396	2.265088532
[truncated: 188 more rows]
