# Supplementary material for: Identifying Potential Mitochondrial Proteome Signatures Associated with the Pathogenesis of Pulmonary Arterial Hypertension in the Rat Model
Source: Oxid Med Cell Longev. 2022 Feb 21;2022:8401924. doi: 10.1155/2022/8401924 (PMC8885180; doi:10.1155/2022/8401924)
Supplement: Supplementary Materials — Supplementary Table S1: the label-free quantitative analysis of the mitochondrial proteome in the rat model. Supplementary Table S2: the significant mitochondrial DEPs in the PAH rat model when compared with control. Supplementary Table S3: identification of upregulated mitochondrial genes based on functional enrichment of the PPI network. Supplementary Table S4: identification of downregulated mitochondrial genes based on functional enrichment of the PPI network. Supplementary Figure S1: the visualization of the PPI network with upregulated mitochondrial DEPs. Supplementary Figure S2: the visualization of the PPI network with downregulated mitochondrial DEPs. [file 8401924.f1.zip › Supplementary Table S3.txt]

Supplementary Table S3. Identification of up-regulated mitochondrial genes based on functional enrichment of the PPI network.
proteasome regulatory particle, and Maintenance of mitochondrial structure and function	autophagy of mitochondrion	Mitophagy - animal
Psmd2	Atg12	Csnk2b
Psmd6	Map1lc3b	Csnk2a1
Psmc6	Sqstm1	Tbk1
Psmc5	Fis1	Tbc1d17
Psmc3		Optn
Psmc2		Sqstm1
Psmd13		Tbc1d15
Psmd1		Fis1
Psmc4
