# Supplementary material for: Identifying Potential Mitochondrial Proteome Signatures Associated with the Pathogenesis of Pulmonary Arterial Hypertension in the Rat Model
Source: Oxid Med Cell Longev. 2022 Feb 21;2022:8401924. doi: 10.1155/2022/8401924 (PMC8885180; doi:10.1155/2022/8401924)
Supplement: Supplementary Materials — Supplementary Table S1: the label-free quantitative analysis of the mitochondrial proteome in the rat model. Supplementary Table S2: the significant mitochondrial DEPs in the PAH rat model when compared with control. Supplementary Table S3: identification of upregulated mitochondrial genes based on functional enrichment of the PPI network. Supplementary Table S4: identification of downregulated mitochondrial genes based on functional enrichment of the PPI network. Supplementary Figure S1: the visualization of the PPI network with upregulated mitochondrial DEPs. Supplementary Figure S2: the visualization of the PPI network with downregulated mitochondrial DEPs. [file 8401924.f1.zip › Supplementary Table S4.txt]

Supplementary Table S4. Identification of down-regulated mitochondrial genes based on functional enrichment of the PPI network.
Mitochondrion	mitochondrion	mitochondrial envelope	mitochondrial membrane	Mitochondrion inner membrane	mitochondrial inner membrane	mitochondrial matrix	inner mitochondrial membrane protein complex	mitochondrial protein complex	mixed, incl. mitochondrial transport, and Eukaryotic porin	mixed, incl. inner mitochondrial membrane protein complex, and Cytochrome c	Ubiquinone, and mitochondrial respiratory chain complex I assembly	mitochondrion organization	mitochondrial proton-transporting ATP synthase complex	mixed, incl. establishment of protein localization to mitochondrion, and Eukaryotic porin	mitochondrial respiratory chain complex III	mitochondrial respirasome	mitochondrial proton-transporting ATP synthase complex, catalytic core F(1)	proton-transporting ATP synthase complex, and ATP synthase D chain, mitochondrial (ATP5H)	fatty acid beta-oxidation, and mitochondrial tRNA methylation	mitochondrial transport	protein targeting to mitochondrion	mitochondrial respiratory chain complex III	mitochondrial ATP synthesis coupled electron transport	inner mitochondrial membrane organization	mitochondrial membrane organization	mitochondrial intermembrane space	mitochondrial nucleoid	integral component of mitochondrial inner membrane	mitochondrial outer membrane	integral component of mitochondrial membrane	Mitochondrial calcium ion transport, and uniplex complex	mixed, incl. Mitochondrial calcium ion transport, and regulation of mitochondrial fission	protein insertion into mitochondrial membrane	mitochondrial electron transport, NADH to ubiquinone	mitochondrial transmembrane transport	mitochondrial electron transport, ubiquinol to cytochrome c	protein import into mitochondrial intermembrane space	mitochondrial promoter sequence-specific DNA binding	TIM22 mitochondrial import inner membrane insertion complex	mitochondrial intermembrane space protein transporter complex	mitochondrial respiratory chain complex assembly	protein processing involved in protein targeting to mitochondrion
Atp5i	Atp5i	Atp5i	Atp5i	Atp5i	Atp5i	Tfam	Atp5i	Atp5i	Mtx2	Atp5i	Ndufa5	Tfam	Atp5i	Mtx2	Pmpcb	Ndufa5	Atp5b	Atp5i	Acadm	Timm10	Timm10	Cyc1	Dld	Timm10	Timm10	Timm10	Tfam	Tmem11	Nlrx1	Tmem11	Pmpcb	Pmpcb	Timm10	Dld	Timm10	Pmpcb	Mia40	Tfam	Timm10	Timm10	Tfam	Pmpcb
Mpst	Mpst	Coq5	Coq5	Coq5	Coq5	Coq5	Atp5b	Atp5b	Timm10	Atp5b	Ndufa7	Tmem11	Atp5b	Timm10	Uqcrc2	Ndufv2	Atp5d	Atp5b	Hadh	Timm9	Timm9	Uqcrc2	Ndufv2	Timm9	Timm9	Timm9	Slc25a5	Chchd6	Slc25a4	Slc25a4	Phb2	Phb2	Timm9	Ndufv2	Timm9	Uqcrc1	Hspd1	Lonp1	Timm9	Timm9	Ndufa5	Uqcrc2
Tfam	Tfam	Atp5b	Atp5b	Atp5b	Atp5b	Aldh2	Ndufa5	Ndufa5	Timm9	Cyc1	Ndufa6	Ndufa5	Atp5d	Timm9	Uqcrfs1	Pmpcb	Atp5a1	Atp5d	Etfb	Slc25a4	Samm50	Uqcrfs1	Pmpcb	Samm50	Slc25a4	Lyn	Tufm	Minos1	Scp2	Chchd6	Mcur1	Mcur1	Samm50	Coq9	Tst	LOC690344					Samm50
Coq5	Coq5	Tmem11	Tmem11	Apool	Tmem11	Mdh2	Timm10	Idh3B	Slc25a4	Atp5d	Ndufb9	Timm10	Atp5a1	Slc25a4	Uqcrc1	Uqcrc2	Atp5c1	Atp5a1	Acadvl	Slc25a5	Pmpcb	Uqcrc1	Coq9	Chchd6	Slc25a5	Cat	Atad3a	LOC690344	Samm50	Minos1	Afg3l2	Afg3l2			Mia40						LOC690344
Aldh2	Aldh2	Ndufa5	Ndufa5	Tmem11	Ndufa5	Dlst	Timm9	Timm10	Slc25a5	Uqcrc2	Ndufv2	Timm9	Usmg5	Slc25a5	LOC690344	Uqcrfs1		Usmg5	Hibch	Samm50	Uqcrc2		Uqcrc1	LOC690344	Samm50	Ak3	Lonp1		Phb2	LOC690344		Bcap31			Hspd1
Mdh2	Mdh2	Timm10	Timm10	Ndufa5	Timm10	Dld	Ndufv2	Timm9	Samm50	Atp5a1	Ndufb10	Slc25a4	Atp5c1	Samm50		Uqcrc1		Atp5c1	Echs1	Pmpcb	Mia40		Sdhd		Chchd6	Arl2			Mavs			Lonp1
Atp5b	Agps	Timm9	Timm9	Ndufa12	Timm9	Idh3B	Pmpcb	Samm50	Pmpcb	Uqcrfs1	Ndufb7	Slc25a5	Atp5f	Chchd3		Sdhd		Atp5f		Uqcrc2	Hspd1		LOC690344		Gimap5	Mia40			Maob
Acsf2	Atp5b	Lyn	Lyn	Timm10	Lyn	Eci1	Atp5d	Ndufv2	Phb2	Usmg5	Ndufs7	Samm50		Prkce		LOC690344				Tst					LOC690344				Ppp1cc
Apool	Acsf2	Cat	Nlrx1	Timm9	Abcb8	Acadm	Uqcrc2	Pmpcb	Chchd3	Uqcrc1		Pmpcb		Chchd6						Mia40									Gimap5
Tmem11	Tmem11	Nlrx1	Abcb8	Ndufa6	Src	Ivd	Atp5a1	Atp5d	Prkce	LOC690675		Phb2		Slc25a24						Gimap5
Dlst	Dlst	Abcb8	Src	Abcb8	Slc25a4	Hadh	Chchd6	Uqcrc2	Chchd6	LOC685596		Uqcrc2		Slc25a31						Hspd1
Oxsm	Ndufa5	Src	Ccdc90b	Src	Slc25a5	Slc25a5	Uqcrfs1	Atp5a1	Mcur1	Atp5c1		Chchd6		Minos1
Ndufa5	Dld	Ccdc90b	Acadm	Slc25a4	Ndufv2	Pmpcb	Usmg5	Chchd6	Afg3l2	LOC687508		Mia40
Dld	Cav1	Acadm	Ivd	Slc25a5	Pmpcb	Hspe1	Uqcrc1	Uqcrfs1	Bcap31	Atp5f		Gimap5
Idh3B	Idh3B	Ivd	Slc25a4	Ndufv2	Phb2	Ak3	Atp5c1	Usmg5	Slc25a24			Dnm2
Ndufa12	Glod4	Slc25a4	Scp2	Phb2	Atp5d	Mccc2	Sdhd	Uqcrc1	Slc25a31			Hspd1
Glod4	Timm10	Scp2	Slc25a5	Chchd3	Uqcrc2	Etfb	Minos1	Atp5c1	Minos1			LOC690344
Timm10	Timm9	Slc25a5	Samm50	Atp5d	Coq9	Tufm	LOC690344	Sdhd	Lonp1			Lonp1
Timm9	Hibadh	Samm50	Ndufv2	Uqcrc2	Atp5a1	Dlat	Atp5f	Minos1
Hibadh	Lyn	Ndufv2	Pmpcb	Atp5a1	Chchd6	Cs		LOC690344
Ndufa6	Cat	Pmpcb	Phb2	Chchd6	Uqcrfs1	Gls		Atp5f
Nlrx1	Nlrx1	Phb2	Atp5d	Uqcrfs1	Acadvl	Tst
Eci1	Eci1	Atp5d	Sfxn3	Acadvl	Usmg5	Tars2
Abcb8	Abcb8	Ak3	Uqcrc2	Cds2	Cds2	Atad3a
Src	Gsta4	Sfxn3	Coq9	Mpv17l	Mpv17l	Ogdh
Ccdc90b	Src	Uqcrc2	Atp5a1	Uqcrc1	Uqcrc1	Oxct1
Acadm	Ccdc90b	Coq9	Chchd6	Atad3a	Atad3a	Hspd1
Cmc1	Acadm	Atp5a1	Uqcrfs1	LOC685596	Atp5c1	Echs1
Ivd	Ivd	Chchd6	Acadvl	Atp5c1	Sdhd	Lonp1
Hadh	Hadh	Uqcrfs1	Usmg5	Sdhd	Minos1
Slc25a4	Slc25a4	Acadvl	Cds2	Minos1	Hspd1
Scp2	Arsb	Usmg5	Mavs	LOC690344	LOC690344
Auh	Scp2	Arl2	Pafah2	Atp5f	Atp5f
Slc25a5	Auh	Cds2	Mpv17l	Apoo
Samm50	Slc25a5	Mavs	Maob
Ndufv2	Samm50	Pafah2	Uqcrc1
Pmpcb	Ndufv2	Mpv17l	Atad3a
Phb2	Pmpcb	Maob	Ppp1cc
Chchd3	Phb2	Uqcrc1	Atp5c1
Idh2	Idh2	Mia40	Ogdh
Pi4k2a	Pi4k2a	Atad3a	Gimap5
Hspe1	Hspe1	Ppp1cc	Sdhd
Atp5d	Gsr	Atp5c1	Dnm2
Ak3	Atp5d	Ogdh	Minos1
Hsdl1	Ak3	Gimap5	Hspd1
Sfxn3	Hsdl1	Sdhd	LOC690344
Uqcrc2	Prkce	Dnm2	Atp5f
Coq9	Sfxn3	Minos1
Atp5a1	Uqcrc2	Hspd1
Chchd6	Coq9	LOC690344
Mccc2	Atp5a1	Atp5f
Etfb	Chchd6
Uqcrfs1	Mccc2
Acadvl	Etfb
Tufm	Clic4
Abcd1	Uqcrfs1
Hspa9	Acadvl
Usmg5	Tufm
Ech1	Gnpat
Bcat2	Hspa9
Arl2	Usmg5
Cds2	Ech1
Aco2	Lipe
Hibch	Bcat2
Dlat	Arl2
Mavs	Cds2
Pafah2	Aco2
Cs	Hibch
Mpv17l	Aldoa
Gls	Dlat
Tst	Mavs
Maob	Pafah2
Tars2	Cs
Uqcrc1	Mpv17l
Mia40	Gls
Atad3a	Tst
LOC690675	Armc10
Ppp1cc	Maob
LOC685596	Tars2
Atp5c1	Uqcrc1
Ogdh	Mia40
Gimap5	Atad3a
Sdhd	Ppp1cc
Sucla2	Atp5c1
Minos1	Ogdh
Suclg2	Gimap5
Oxct1	Sdhd
Hspd1	Hsdl2
LOC690344	Dnm2
Atp5f	Minos1
Apoo	Oxct1
Echs1	Hspd1
Lonp1	LOC690344
Nfs1	P4ha1
	Atp5f
	Echs1
	Lonp1
	Nfs1
