# Supplementary figures and images for: Identifying Potential Mitochondrial Proteome Signatures Associated with the Pathogenesis of Pulmonary Arterial Hypertension in the Rat Model
Source: Hindawi journal article supplement (doi:10.1155/2022/8401924), 2022-01-01

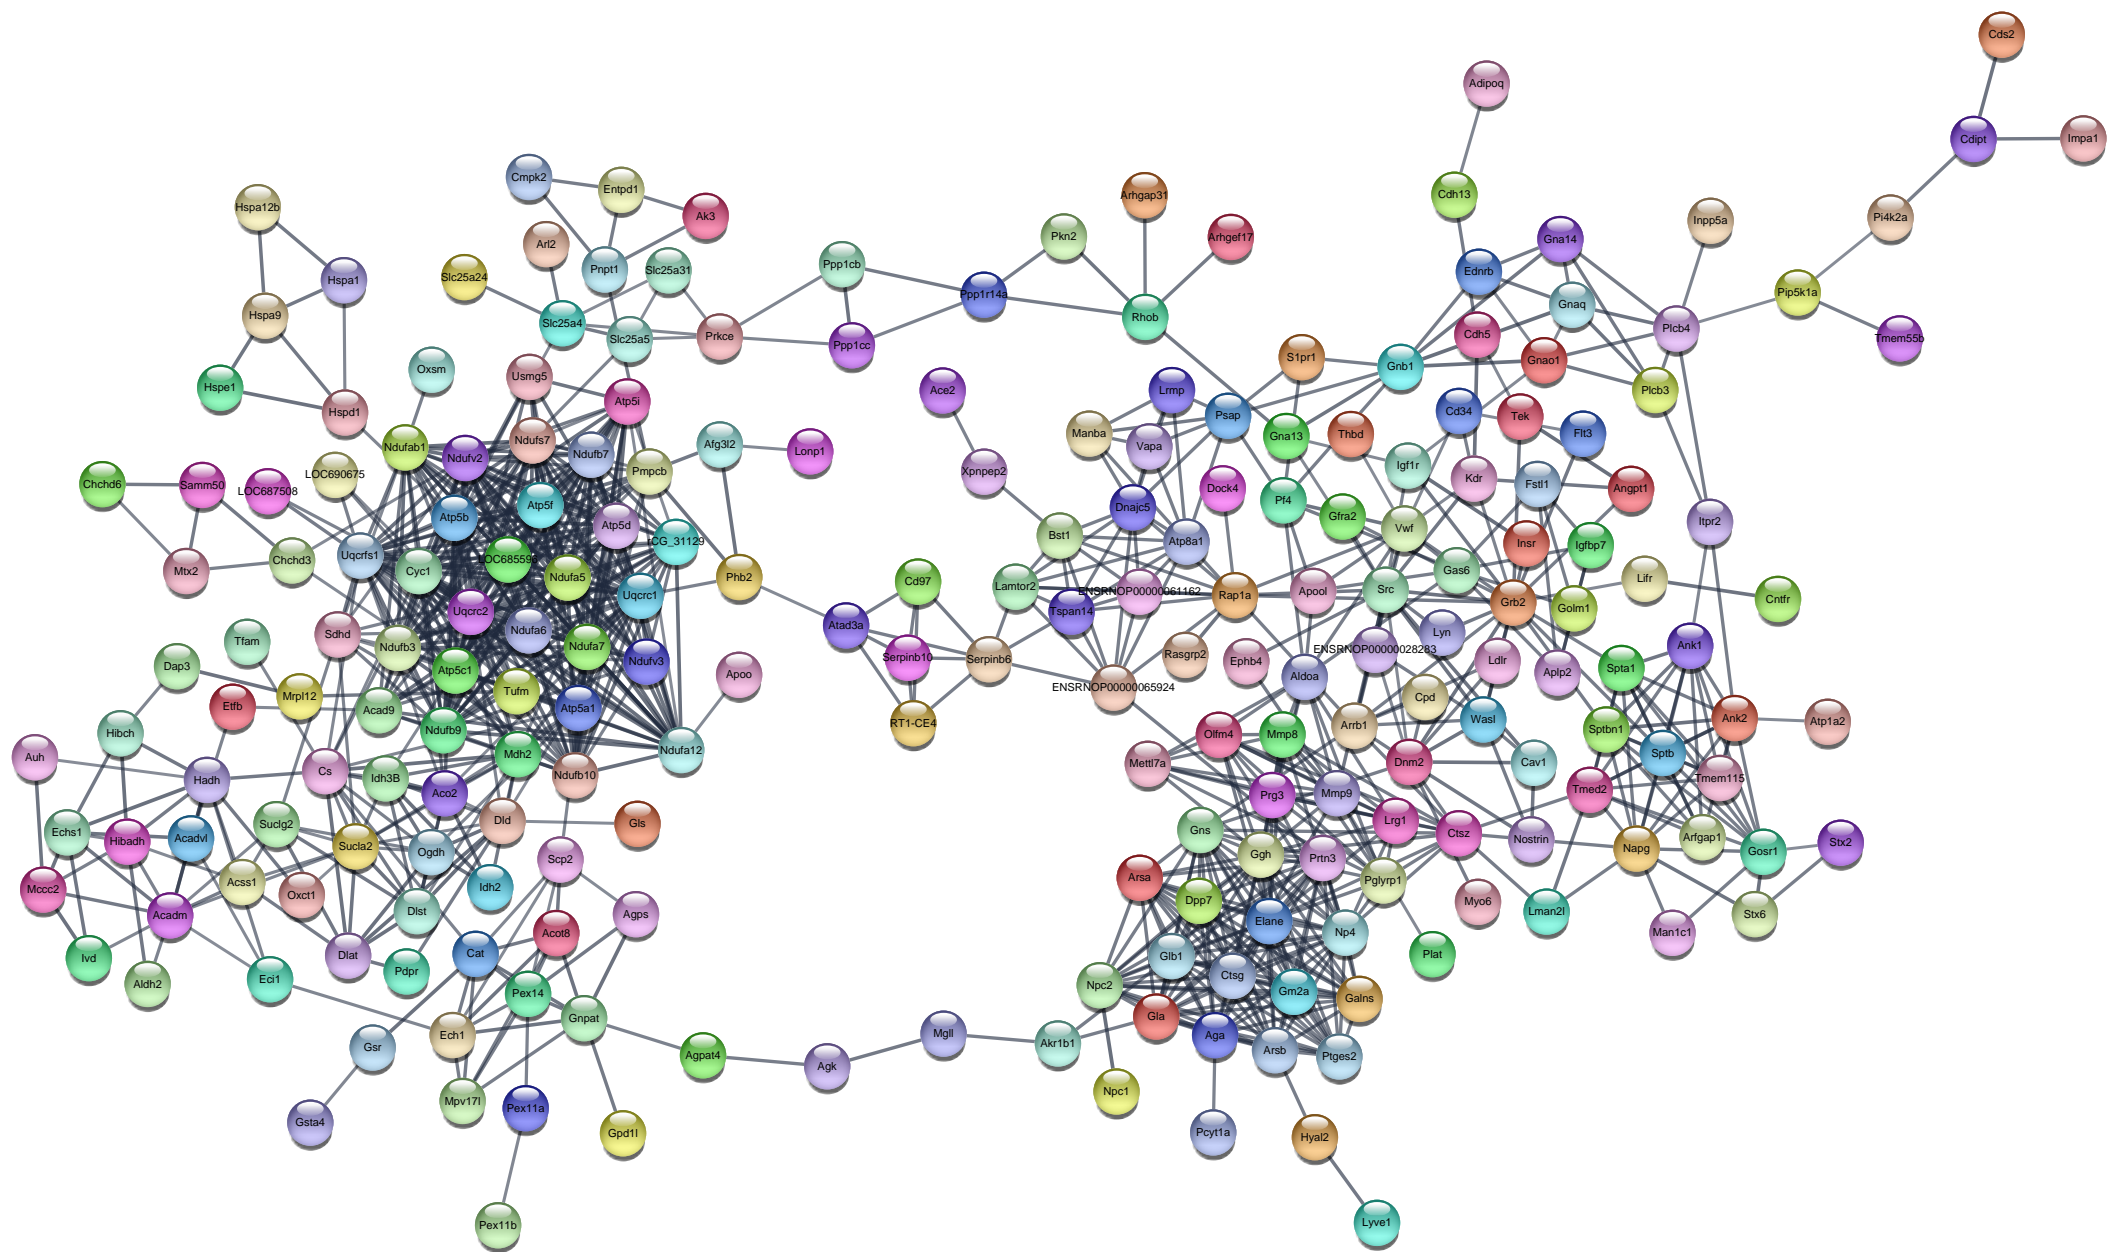

Supplement: f1 [file 8401924.f1.zip]

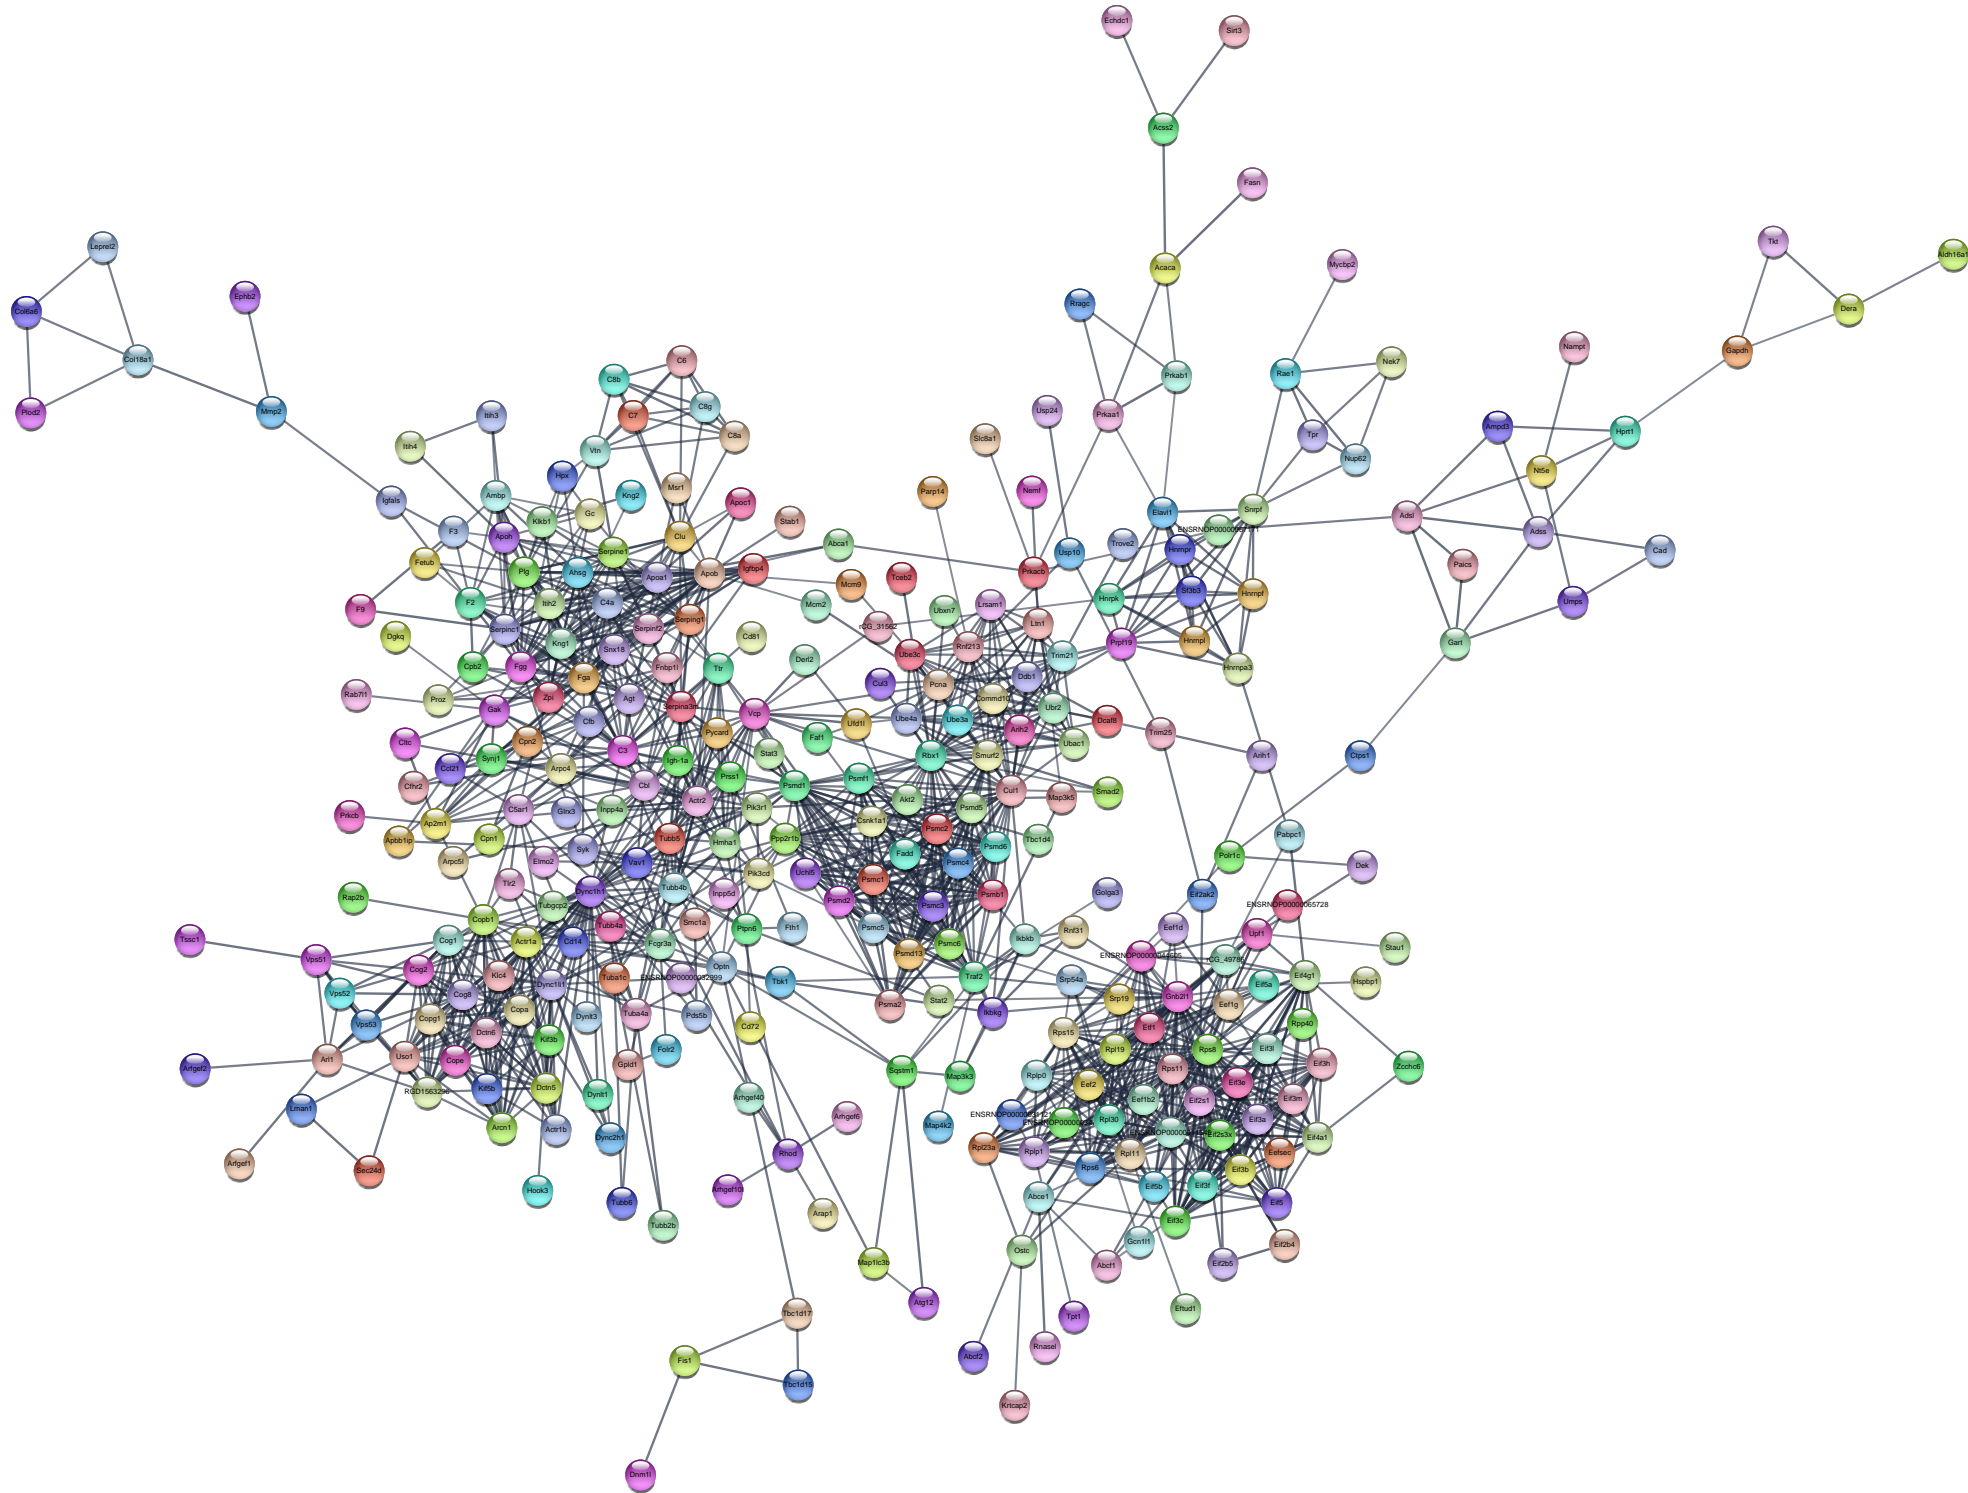

Supplement: f1 [file 8401924.f1.zip]
